# Supplementary material for: Genome-Wide Analysis of Two-Component Systems and Prediction of Stress-Responsive Two-Component System Members in Soybean
Source: PubMed Central journal article supplement — DNA Res. 2010 Sep 3;17(5):303–24. doi: 10.1093/dnares/dsq021 (PMC2955714; doi:10.1093/dnares/dsq021), 2010-09-03
Supplement: supp_dsq021_dsq021supp1.pdf [file supp_dsq021_dsq021supp1.pdf]

>GmHK01 (Glyma03g37760.1)

MYSNSSSLSTSFGGASNLSIYYIQPVNRDTGELYGKAIIEVPSNIINTSWFVKAVNSSLSYASLG  
TKWNNDHDLDFVSSSRIKGTQVISLGIPTTTITDFFTPVGANLSLVTKDGGKMLVEGIQNTRLGFS  
NDMVYFQSVNANGDQTSYDGVVSCKDGDAAASILNIQGVEYLIRCSTIDIMEIKSVYVLAVPRK  
GLDHFVLDIKKKGLALLTTMIVMILIAMVSFLYINVRSLRREMHLCWSLIKQNEATQQAERKCMN  
KSLAFASASHDVRASLAGLTGLIEMSFEVSPDSELGTNLRQMDSCTKDLLGLLNSILDASKVE  
AGKMLLEEEEFVDFQLLEDVVDLYHSVAMKKGVDIVLPCNGSVLRYRSTKGDGRGKLGKQVLC  
NLLSNAVKFTTEGHIAVRAWAQKPSLQSSMIATHQYSSRLLSRLCCRQNEARDDVEDLNIQQ  
DPNCMDFTIEVDDTGKGPKEKHKSVFENYVQVKEITLGGEGTGLGLGIVQSLVRLMHGDIEIM  
DKDIGEKGTCFRNVLLTAHETQMNDTRDDQAGSGNKNQSHGLTMSPKLSIWTRSPRSEAS  
RVVLLIQNEERRGTTQRFMERLGIKVKVKEWRQLHYTLKKIKQKGLHPNSSSSPESDSPA  
SSCTNGVPLSAQDGTNYISSIFKRTDIEASSGFLVIDANAGPFSELCKVVAEFKRGCLYPCRV  
VWLENPLIPSDNKILNKDVSNSNDIVLSKPLHGHRLFQVIRILPEYGGVWPCSSSETKKEKGQV  
SLTDEGAIRRVELQECGSSSVTQQSYDRSRARKSHIHQGEIQECEELSNEKPLWGMKCLVVED  
VLLRRITKSTLDRLGASVMCENGEQAVQTVEEGLTRNSSNRPCDFILMDCQMPVMDGYEAT  
RRIREIEKSHGVHIPIFALTANTGKEAILSIEAGMDDHLIKPINKEALLKAIKRIYTK\*

>GmHK02 (Glyma04g06190.1)

MENDCIKMDIEVPSMWPEDIGMEVGKQFNIEKPGRDQDMLEEVTHIEPTIVDFKRLMELTNF  
TEKGSSQLAYLMKQWEYKQANVVRLLREELDNLSKQRQDVELRKLEILEEHRFEERHGADK  
RPVSILDDVYDGIWQDIPCRSDVVENKRSEIDAEYDTVMCWKQRALHSEKQLEASIQREQIL  
EEKLQERIANIERQSSPVEELSQLKRADNLFHILQNAPIVIGHQDKELRYCFIYNHFPSLQEEDI  
GKTDVEIFTGAGVKEAQEFKREVLEKGLPAKREITFETELFGSKTFLIYVEPVFSKAGETIGINYM  
GMDITDQVRKRERMAKIREEIAVQKAKETELNKTIHTEETMRAKQMLATMSHEIRSPLSGVVS  
MAEILSNTKLDWEQRQLLDVMLSSGDLVLQLINDILDLSKVESGVMKLEATKFRPREVVRHVLO  
IAAASLQKILTLEGHVADDVPIEVIGDVLRRMQILTNLISNAIKFTHEGKVGINLYVVSEPTFAKAE  
CIQKMTSSHSTISVNAETTVMWIRCDVYDTGIGIPEDIAPTLTKRYMQVSADHTRKYGGTGLGLAI  
CKQLVELMGGQLTVSSKEHYGSTFTFILPYKVSIACDHSDDLDELSDVENNDAASDDTIESFFQ  
FQPRTLGLSLFSSNGSSRTHKLLTHKIGYTSSHLGGFSESLYSFPSNDIMSKGTCSADDASSVV  
EVPMESESASSGHSQKTKSNGEMSEAKVMGRQTQLSNALQTAILVEDNKNINVMVTQSMK  
QLGHSIDVVNNGVEAVRAVQRHTYDLILMDVCMVMNGLQATKLIRTFEETGNWDAARNAGIE  
QSVQDPDCECSVSTKRIPIVAMTANALSESAAECFANGMDSFVSKPVAFAQKLKECIEQYLVNF  
S\*

>GmHK03 (Glyma14g12330.1)

MVCEMESDCIEDMDIEVLSSMWPEDIGTDVVGKQFNIEKPGRDQDMLEEVTHIEPTIADFQRLME  
LTNYTDKGGSSQLAYLMKHWEYKQANAVRLLREELDNLSKQRKEVELRKLEILKDRFEENY  
GDKRPVSILDEVYTTWQDVPVPLRKSNIIVQTKRIEIDAEYDTVVYWKQRALQLERQLEASVQR  
EQILMEDIKLEESVNLERQSSPVEELSQLKRADNLFHILQNAPIVIGHQDKELRYRFIYNHFPS  
LQEEIIGKTDVEIFTGSGVKESQDFKREVMEKGLPAKKEITFETELFGSKTFLIYVEPVFSKAGE  
TIGVNYMGMEITDQVRKRERMAKLREEIAVQKAKETELNKTIHTEETMRAKQMLATMSHEIRS  
PLSGVVSMAEILSTTKLDREQRQLLNVMISSGDLVLQLINDILDLSKVESGVMKLEATKFRPREV  
VKHVLQTAASLQKMLTLEGNVADDMPIEVIGDVLRRMQILTNLVSNAVKFTHEGKVGINLYVVP  
EPPFAKAEHQKMITEQSTNSANGVKEEKRASTPRSSSDQNCLDVKSECSMNGDTEEQTHST  
ETVWIRCDVYDTGIGIPEKAIPTLFRRYMQVSADHARKYGGTGLGLAICKQLVELMGGRLTVTS  
KEHVGSTFTFILPYKVSTACDDSDDPDELSDVDDNDDDTTEGFFQFQPRTLGLSLFTSNGPTRPQ  
NILPGFRSSHKFNIGISENSYSFLTNTNRSKGIKMSSESTSSSSHSPETKQERPKILLVEDNKNINVM  
TQSMKRLGYSMDVVNNGVEAVRAVQHHTYDIILMDVYMPVMNGLQTTKLIRSYEDTGNWEA  
ARKAGIEQLICLLVHYIESRRQELQHVNLKXHADKPYTTQLFKQLSPDKEYATCHPQCSMMT  
ANTMSESAEECYANGMDSFVSKPVTFQKLDKDCLEQYLR\*

>GmHK04 (Glyma17g33670.1)

MVCEMESDCIEDMDIEVLSSMWPEDIGTDVVGKQFNIEKPGRDQDMLEEVTHIEPTIADFQRLME  
LTNYTDKGGSSQLAYLMQHWEYKQANAVRLLREELDNLSKQRKEVELRKLEILKDRFEENY  
GGDKRPVSILDEVYTTWQDVPVPLRKSDDVVVQNKRIEIEAEYDTVVYWKQRALQLEKQLEASV  
QREQILMDKLQESVKNLERQSSPVEELSQLKRADNLFHILQNAPIVIGHQDKELRYRFIYNHF

PSLQEEDIIGKTDVEIFTGSGVKESQDFKREVMKGLPAKKEITFETELFGSKTFLIYVEPVFASKA  
GETIGVNYMGMEITDQVRKRERMAKLREDIAVQKAKETELNKTIIHITEETMRAKQMLATMSHEI  
RSPLSGVVSMAEILSTTKLDREQRQLLNVMISSGDLVLQLINDILDLSKVESGVMKLEATKFRPR  
EVLVHVLQTAASLQKILTLEGNVADDIPVEVIGDVLRIQILTNLVSNAVKFTHEGKVGINLYVV  
TEPPFAKAEGHQKMITEQSTNSANGVKEEKRASTPRSNDDQNCCLDVNDECSSVKSECSING  
DTEEQTHSTETVWIRCDVYDTGIGIPEKAIPTLFRRYMQVSADHARKYGGTGLGLAICKQLVEL  
MGGRLTVTSKEHCGSTFTFILPYKVSTVCDSDSDPDELSVDVDDNDDDTTEGFFQFQPRTLGSL  
FSSNGPTRPQNVLPGFRSSHNFNGFSENSFSFLTNIISKGTNSTEDASSVIVDAPEMSESTGSS  
SHSPQTKHENVVNTNNQNQDKAHARLQNGSVDSQHKAMTLGTMSSEPQQTCQGQVKTDI  
TSQSVIKSNKYTSSEVTKSTLGPKILLVEDNKINVMVTQSMMLKRLGYGMDVVNNGVEAVRAVQ  
RHTYDVLMDVYMPVMNGLQTTKLIRSYEETGNWEAAREAGIEQCSPASNECSVPLKNRIHIA  
MTANTMSESADECYANGMDSFVSKPVTQKLLKDCLEQYLR\*

>GmHK05 (Glyma06g06240.1)

MENDSIEDMDIEALPSMWPQDIGTEVGKQFNIEKAGRDQDMLLEEVIIIEPTIVDFKRLMELTDF  
TEKGSSQLAYLMKQWEYKQASVVRLLREELDNLSKQRQDAELRKKSDVVDKELRYCFIYNHF  
PSLQEEDIIGKTDVEIFTGAGVKEAQEFKREVLEKGLPAKREITFETELFGSKTFLIYVEPVFASKA  
GETIGINYMGMDITDQVRKRERMAKIREEIAVQKAKETELNKTIIHITEETMRAKQMLATMSHEIR  
SPLSGVVSMAEILSNTKLDWEQRQLLDVMLSSGDLVLQIINDILDLSKVESGVMKLEATKFRPR  
EVLVHVLQTAASLQKILTLEGHVADDVPIEVIGDVLRRMQILTNLISNAIKFTHEGRVGINLYVVP  
KPNFAKAEDIQMMTPNQSTMSVNDTEEQPYSAEITVWIRCDVYDTGIGIPEDAIPTLFKRYMQV  
SADHTRKYGGTGLGLAICKQLVELMGGQLTVSSKEHYGSTFTFILPYKVSACDHSDDPDELS  
LENNDVASDDTIESFFQFQPRTLGSLFSSNGSSRTQKLLTHKIGYTSSHKLGGFSESLSYFSPN  
DIMSKGTCVDDASSVHQDKARAWSFNGYADSSEVTVSNEMAGATNSTSEVTKSTIKPKILL  
VEDNKINVMVTQSMMLKQLGHSIDVVNNGVEAVRAVQRHTYDLILMDVCMVMDGLQATKLIRT  
FEETGNCDAAARSAGIEESLPDQDYECYVPFTKRVPIVAMTANALSESAAEECFANGMDSFVSKP  
VTFQKLKECIEQYLVNFS\*

>GmHK06 (Glyma06g06180.1)

MYWKQRALHSEKQLEASIQREEILEEKLHERIANIERQSSPVEELSILKRADNFLHFILQNA  
VIGHQDKELRYCFIYNHFPSLHEEDIIGKTDVEIFTGAGVKEAQEFKREVLEKGLPAKREITFETE  
LFGSKTFLIYVEPVFASKAGETIGINYMGMDITDQVRKRERMAKIREEIAVQKAKETELNKTIIHITEE  
TMRKQMLATMSHEIRSPLSGVVSMAEILSNTKLDWEQRQLLDVMLSSGDLVLQIINDILDLSK  
VESGVMKLEATKFRPREVLVHVLQTAASLQKILTLEGHVADDVPIEVIGDVLRRMQILTNLISN  
AIKFTHEGRVGINLYVVPKPNFAKAEDIQMMTPNQSTMSVNDTEEQPYSAEITVWIRCDVYDTG  
IGIPEDAIPTLFKRYMQVSADHTRKYGGTGLGLAICKQLVELMGGQLTVSSKEHYGSTFTFILPY  
KVSACDHNNDVASDDTIESFFQFQPRTLGSLFSSNALWALFSLMDLAGHRTHSFPNSDIMSK  
GTCVDDASSVVDAPETSELASSSGHSLETKNKSLGQKANTTTQCVTSSSTSEVTKSTIKPKI  
LLVEDNKINVMVTQSMMLKQLGHSIDVVNNGVEAVRAVQRHTYDLILMDVCMVMDGLQATKLI  
RTFEETGNCDAAARSAGIEESLPDQDYECYVPFTKRVPIVAMTANALSESAAEECFANGMDSFV  
KPVTFQKLKECIEQYLVNFS\*

>GmHK07 (Glyma01g36950.1)

MGSKCRYLHRLCACATSWNKNSTPKGRRIFHRDVEKEEFQYASSHCLSSYYSVVFVRLAIMV  
MLAILIGLLTILWHFTKIYAKSLSSLAYGLRYELLQRPVLRMWNILNSTSEITTAQVKLSQYVIR  
RHSNPATQAEQVELYEAMRAVTWALFASRKALNSITINYKNGFVQAFHRDLKDNNTFYIYSDLS  
NYSMGASNSNAVNSISKYRAWVDRGNYSIAIYREPLDPVSGEKIGKAMKIAPEDLINIAGLSQV  
PDGVASWHVAVSKFTDSSLALPVWDSSNKTIMAVVGVTTALYSVGLMREL VEMHSGHM  
YLTSEQGYLLATSTAPLLATSTKPPKLMVDCEDNVIRLGAEWLQRTYGNFPSPSHDIHVEN  
VKLGHQRYIDSFVNLKRLPLVGVIIIPRKYIMGQVDERAYKTLVILISASLCILVIGCVCILITNG  
VSKEMNLRaelinqleARRKAeASSNYKSQFLANMSHEL RTPMAAVIGLLDILISDDCLTNEQY  
STVTQIRKSTALLRLLNILDLSKVESGKLVLEDAEFDLGRELEGLVDMFSVQCINHNVTVDL  
LSDDMPKLVKGD SARVVQIFANLINNSIKFTPSGHILRGWCENPNSSIGSPNFPLDQKKSRLQ  
KCRERP NANHAKRTSIKDKKVLWFEVDDTGCgidpskWDsvfesfeqADPSTTRLHGGTGLG  
LCIVRNLVNMGGDIRVVKKEGSGTLMRLCLLSEPMDVTEQQCAVDLTDNGLVLLALHGNM  
SRLITSKWLQKNGVCTMEASDWNGLTQILREL F HARSSVHNTDFDAHYPAKEELKSKLLNIGD

MRNPVFVIVVDIGLLDLSTDIWKEQFNFLHRYFGRAKFWWMLNHDTSNVTKMELRRKGHVLMV  
NKPLYKAKMIQILEAVIKERNLELQKKNMTAPRTTMKEGDLHEFLEIDSTHFDGASSDDSDIPET  
GGSNPVSANGDKPAEKLAKESSHASSPYHMNCLLEEDSECGETNTVTSSSKAVDGGKKSLEGLKI  
LLAEDTPVLQRVATIMLEKMGADVAVGDGQQAVDALNCMFAAEDCRRESLQKERNTRSQTE  
ISTCRPYDLILMDCQMPKMDGYEATKAIRKSEVGTSMHIPIVALTAHAMSCDEAKCLEVGMDAY  
LTKPIDFKMMVSTILSLTKRTS\*

>GmHK08 (Glyma11g08310.1)

MGSKCRYLFHRLCGCDTSWNKNSTPKSRRIFHRDVEKEEFQYASSHCLSSYYSVFVRLAIMV  
MLAILIGLLTILTWHTKIYTAKSRLSLAYGLRYELLQRPVLRMWNILNSTSEITTAQVKLSQYVIR  
RHSNPATQAEQVELYEAMRAVTWALFASRKALNSITINYKNGFVQAFHRDLKDNNTFYIYSDLS  
NYSMGASNSNEVNSISKHRAWDDKGLHGNYSYIYREPLDPVSGEKIGKAMKIAPEDLINIAGL  
SQVPDGVASWHVAVSKFTDSPLLSAALPVWDSSNKTIMAVVGVTTALYSVGQLMRELVEHMS  
GHMYLTSQEGYLLATSTAPLLETSTKPPKLMKMAVDCEDNVIRLGAEWLQRTYGNFPSPSHEI  
HVENVKLGHQRYIDSFFLNLKRLPLVGVIIIPRKYIMGQVDERAYKTLVILISASLCILVIGVCILI  
LTNGVSKEMNLRAELINQLEARRKAEASSNYKSQFLANMSHELRTPMMAAVIGLLDILISDDCLT  
NEQYSTVTQIRKCASTALLRLLNLDLSKVESGKLVLEDAEFDLGRELEGLVDMFVQCMNHNV  
ETVLDLSDMPKVVRGDSARVVQIFANLINNSIKFTPSGHILRGWCENQNSYVGSPLDQKKS  
SLQKCIERPANAHAKRTSVKDNKLVWFVDDTGCIDPSKWDSVFESFEQADPSTTRLHGGT  
GLGLCIVRNLVNMGGDIRVVKKEGSGTLMRLCLLLSAPMDVTEQQCAVDLTDNGLVLLALH  
GNMGRLLTSKWLQKNGVCTMEASDWNGLTQILRELPHAGSSVHNTDFEAHYPAKEELKSKLL  
NIRDMRNPGFVIVVDIGLLDLSTDIWKEQFNFLHRYFGRAKFWWMLNHDTSNVTKMELRRKGHIL  
MVNKPLYKAKMIHILEAVINERNLELQKKNMIAPRTTMKEGDLHEFLEIDSTHFDGASSDDSDIS  
EISGSNPVSANGDKPVEKLENSHPSSPHHMNCLKNLLVPAPVLPKTTNLNHYPPKNHHPFQ  
QKIRMKILNVGTQIGSPAQGLKILLAEDTPVLQRVATIMLEKMGADVAVGDGQQAVDALNCM  
FTAEDCRRESLQKERNTRSQTEISTCRPYDLILMDCQMPKMDGYEATKAIRKSEVGTSRHIPIV  
ALTAHAMSCDEAKCLEVGMDAYLTKPIDFKMMVSTILSLTKRTS\*

>GmHK09 (Glyma02g05220.1)

MGIKCIHVFDRLYSFFTCSSKSTMPSGRRIFHRDVEKEEFQYASTQCLSSYYSVFVRLAIMAM  
LAILIGLLTFLTWHTKIYTTKSLNSLAYDLRYELLQRPILRMWNILNSTAEITTAQVKLSQYVIRK  
HTNFATQADQVEMYEAMRAVTWALFAGKKALNSITVYKNGFVQAFHRDLKDNNTFYIYSDLA  
NYSMAASGYNEINSRSSHREAWNDKDIHGHPAIWYREPLDPISGEKIGKVRPIAPEDSINIAGLS  
QVPDGVASWHVAVSKFTDSPLLSAALPVWDSSNKSIEAVVGVTTALYSVGQLMKELVEKHS  
HMYLTSQEGYLLATSTNAPLLSNSTKPPKLMKMAVEQCNEVIREGAQWLQKTYGNFPQSHL  
HVENVRLGRQQYIDSFFLNLKRLPLVGVIIIPRKHIMGQADERAFKTLVILISASLCIIVIGVCILI  
LTNGVSKEMKLRAELISHLEARRKAEASSNYKSQFLANMSHELRTPMMAAVIGLLDILISDDRLT  
NEQCATVVTQIRKCASTALLRLLNLDLSKVESGKLVLEDAEFDLGRELEGLVDMFVQCMNHNV  
ETVLDLSDMPKLVVRGDSARVVQIFANLINNSIKFTLSGHIVLRGWCENPNCSQDNTFPLEQK  
KLRCSSKTRAKQHENHAKRTSNRDNKMILWFEVDDTGCIDPSKWESVFESFEQADPSTTRL  
HGGTGLGLCIVRTL VNKMGGEIKVVKKEGSGTLMRLCLRLSAPVDATEQHCQVDFANKGLVVL  
LALHGNMGRSATS KWLQKNGVVTMEAAEWNGLTQILRVLFHARSSAHNNGFDANYSVHDNL  
KSRLLSIQELRNPVFVIAVDIGLLDLSTDIWKEQLNFLHRYFGRAKFWWILNHDSNTMKMDLCR  
KGHTLVNKPLYKTKMIHILESIIKDRNEELQKKNMTTLRATVKEGNLHESLEIDYTCQDVASSD  
GSDISETGGSNPVSARGDKQREKVVRS DPSSQHQINNLVGLTNECMEDDNHRKEELCQSSLN  
SNDVTANASPKSSSTKQASFATGARDGDSEYGETRKASSSSRAVSGKKSLEGLRILLAEDTPV  
IQRVATIMLEKMGAIIVAVGDGRQAVDALNGMSGVEDCRRETLKERNTRSSQTEILSCPPYDL  
ILMDCQMPKMDGYEATKAIRKSEEGTGLHIPIVALTAHAMSCDEAKCLEVGMDAYLTKPIDFKL  
MESTILSLTRGTS\*

>GmHK10 (Glyma02g47610.1)

MCPENQELQKEHTCVVDTVEPIEQCPILDDYVQTRLELSFPLKNYVSLALRSALSTDLTLLLSL  
NNYEGVHSLHGCWWVIGIIMS YFCLLWRSQKQKLVQGHGAQQKQLKHFPRGSPRGTRWR  
KLLVIFVSLGIIGSFWLFWHLNTGIMQRREETLANMCDERARMLQDQFNVSMNHVHALAILVS  
TFHHGKHPAIDQKIFGEYTESTAFERPLTSGVAYALKVLHSDRMHFEKQHGWTIKKMETENE  
ALVQDCIPEKLDPAPIQDEYAPVIFAQETVSHIVSIDMMMSGKEDHENILRARASGKGVLTSPFKL

LKSNHLGVVLTFAVYNTNLPLDATPEQRTEATVGYL GASYDVPSLVDKLLHQLASKQTIVVNVY  
DTTNASAPITMYGTDVADTGLLHISLDFGDPLRKHEMHC RFKQRPPLPWTAINASVGVFVITLL  
LGHIFYAAINRIAKVEADYRQMRELKVRAEAADVAKSQFLATVSHEIRTPMNGVLGMLQMLMD  
TELDENQMDCAQTAHKSGKDLISVISEVLDQAKIEAGKLELEAVAFDPRAILDEVLSLFSEKSNE  
KGIELAVYASNQVPKVVIGDPKRFRQIITNLVGNLSLKFTHDKGHV FVSVHLASEVKNPLHIMDAV  
LREGLNLSQDITNRTYDTLSGFPVCNRWKS WANFTKLSGTNEPEIIQLLVIVEDTGIGIPTDAQS  
RIFTPFMQADSSTSR TYGGTGIGLSISRCLVDLMGGEIGFVSEPGIGSTFSFTGTFRKGESTSLD  
AMRQNNHFGSEFQELRTLVDVDRRKIRAEVTKYHLQRLGMSVDVTYSLNSAC SCLSNVCNMSM  
LAMILIDKDAWDKEYHILYTIKKRRQNGIKGDPNLNPKIFLLATHLSSNEQDELKSVGIDDILMK  
PLWFSSLIQCYRESLGTENKRVNRKKVSKLGNLLIDKQILVVD DNAVNRRAVAKGVLQKYGAKV  
TAVESGRAALKMLELPHNFDACFMDLQMPMDGF EATRIRKIRCLESEVNEKIACGQASAE MFG  
NISYWHIPILAMTADSTQSSNEECIKCGMNDYVSKPFEEEQLYMAMARFFKSDS\*

>GmHK11 (Glyma14g01040.1)

SNLIKGCWWVLIGITMSYFCLLWRNQQKQLVQGH PAAQQKCLKHFPRGSPSRGAGRWRKLL  
VIFVSLGIIGSFWLFWHLNTGIMRRREETLANMCDERARMLQDQFN VSMNHVHALAILVSTFHH  
GKHPSAIDQKIFGEYTESTAFERPLTSGVAYALKVLHSDRMHFEKQHGWTIKMETENEALVQ  
DCIPENLDPAPIQDEYAPVIFAQETVSHIVSIDMMSGKEDRENILRARASGKG VLTSPFKLLKSN  
HLGVVLTFAVYNTNLPLDATLEQRIEATVGYL GASYDVPSLVDKLLHQLASKQTIVVNVYDTTN  
ASAPITMYGTDVADTGLLYISSLDFGDPLRKHEMHCSFKQRPPLPWTAINASVGVFVITLLLGH I  
FYAAINRIAKVEDDYRQMRELKVRAEAADVAKSQFLATVSHEIRTPMNGVLGMLQMLMDTELD  
ENQMDCAQTAHKSGKDLISVISEVLDQAKIEAGKLELEAVAFDPRAILDEILSLFSEKSNEKGI EL  
AVYASNQVPKVVIGDPKRFRQIITNLVGNLSLKFTHDKGHV FVSVHLANEVKNPLHIMDAV LREG  
LNLNQDISNRTYDTLSGFPVCNRWKS WANFKQLSGINEPEIIQLLVIVEDTGIGIPTDAQSRIFTPF  
MQADSSTSR TYGGTGIGLSISKCLVDLMGGEIGFVSEPGIGSTFSFTGTFRKGESTSLDAMQQN  
NHFSGSEFQGLRTLVDVSRKIRAEVTRYHLQRLGMSVDVTYSLNSAC SCLSNVCNKSMSTQLA  
MILIDKDAWDKECHILYTIKKRRQNGIKGDPMNLNPKIFLLATHLSSNEQDGLKSVGII DDILMKPL  
WLSSLIQCYRVS LGTENKRVNRKKVSKLGNLLIDKQILVVD DNAVNRRAVAKGVLQKYGAKVTA  
VESGRAALKMLKLP HNFDACFMDLQMPMDGF EATRIRKIRCLESEVNEKIACGQASAE MFGSIS  
YWHIPILAMTADSTQSSNEECIKCGMDDYVSKPFEEEEKLYMAMARFFKSDT\*

>GmHK12 (Glyma08g11060.1)

MSLLHVVGFLKVGHL LLLVLCWVVSVVYLNWFLSSGIIMDTKMGGGGGGGSKMWHKKWWE  
KISGQGCKIHQQYYQYIGSKKV KRALWRKLLTWVVGWFIVSLRIFCYMSSQGTEKRKETLAS  
MCDERARMLQDQFN VSMNHIQAMSILISTFHAKSPSAIDQKTF AKYTERTAFERPLTSGVAYA  
VRVLHSEREQFEKQQGWTIK RMDTLEQNPVHKDDYAPEALEPSPVQEEYAPVIFAQDTIAHVIS  
VNVLSGKEDRENVLRARESGKGVLTAPFRLLKTNRLGVILTF AVYKRDLP SNTPNERIQATDG  
YLGGVDFVESLVEKLLQQLASKQTIVVHVYDTNRTHTPIAMYGSNESGDFFYHVSTLNF GD PFR  
KHEMHCRVFKQKPPWPVVAITTSIGILVIALLVGYIFHATVNRIAKVEDDYREMMELKRAEAAD  
VAKSQFLATVSHEIRTPMNGVLGMLHMLMDTDLVDTQEQEYVRTAQESGKALVSLINEVLDQAK  
IEFGKLELEAVLFDIRAILDDVLSLFSEKSQGKRVELAVYVSDHVP ELLIGDPGRFRQIITNL MGN  
SIKFTDKGHIFVTIHLVEEVRSIEVDKESSENTLSGSPVADSRRSWEGFKA FSQEGPLGSFSS  
PSNDLVNLI VSVEDTGEGIPLESQPLIFTPFMQVGS SISRKHGGTGIGLSISKCLVGLMNGEIGFV  
SIPKIGSTFTTAVFTNGHRSSSECKIQINNQPQSASSEFEGMTALIIDPRSVRAEVSGYHIQRL  
GIHVEMVSDLKQGLSTISNGNVVNMV LIEQEVWDRDLGLSSHFNNTRRIDHGVPPKLFILVNS  
SSSFKASVNLGVHNPTVITKPLRASMLAASLQRAMGVQNKGAPHRELQSLSLRHLLRGRKILIV  
DDNGVNRAVAAGALKKYGADVVCVSSGKDAISSLKPPHQFDACFMDIQMPMDGF EATRIR  
EMEDSVNREVSMDDFENITNWHVPILAMTADVIQATHEECLRCGMDGYVSKPF EAEQLYREVS  
RFFQSS\*

>GmHK13 (Glyma05g28070.1)

MSLLHVVG FALKVGHL LLLVLCWVVSVVYLNWFISSGIMETKMMGGGGGGGKMWHKKWW  
ENISGQGCKIHQQYYQYIGSKKV KRALWRKILLTWVVGWFIVSLWIFSYMSLQGTEKRKETLAS  
MCDERARMLQDQFN VSMNHIQAMSILISTFHAKSPSAIDQKTF AKYTERTAFERPLTSGVAYA  
VRVLHSEREQFEKQQGWTIK RMDTLEQNPVHKDDYAPEALEPSPVQEEYAPVIFAQDTIAHVIS  
VNVLSGKEDRENVLRARESGKGVLTAPFRLLKTNRLGVILTF AVYKRDLP SNATPNERIQATDG

YLGGVFDVESLVEKLLQQLASKQSVIVNVYDTTNHHTPIAMYGSNESGDVFFHVSTLNFQDPFR  
KHEMHCRCFKQKPPWPVVAITTSIGILVIALLVGHIFHATVNRIAEVEDDYRKEMELKKQAEAAD  
VAKSQFLATVSHEIRTPMNGVLGMLHMLMDTDLQVQEQEYVRTAQESGKALVSLINEVLDQAK  
IEFGKLELEAVLFDIRAILDDVLSLFSEKSGQKVELAVYVSDHVPPELLIGDPGRFRQIITNLMGN  
SIKFTDKGHIFVTIHLVEEVVRSIEVDKESSENTLSGSPVADSRRSWEGFKAFSQEGPLGSFSS  
PSSDLVNLIVSVEDTGEPILESQPLIYTPFMQVGPSISRKHGGTGIGLSISKCLVGLMNGEIGFV  
SIPKTGSTFTFTAVFTNGHCSSNECKVQQINNQPHSASSEFEGMTALIIDPRSVRAKVSRYHIQR  
LGIHVEMVSDLKQGLSTISNGNIIINMVLIEQEVWDRDLGLSSHFNTRRIDQGVPKLFILVNS  
SSSFKASVNLGVHNPIVITKPLRASMLAASLQRAMGVQNKGAPHRELQSLSLRHLLRGRKILIV  
DDNSVNRAVAAGALKKYGADVVCVSSGKDAISSLKPPHQFDACFMDIQMPMDGFEATKRVR  
EMEDSVNREVSMDDFENITNWHVPILAMTADVIHATHEECLKWGMGDGYVSKPFEAEQLYREVS  
RFFQSS\*

>GmHK14 (Glyma07g27540.1)

LKMQSHHPVALRLHDQMGSKRKYTFIAHRAWLPKFLLLWILLMALISWCIYSKMDDDTKVRR  
KEVLGSLCDQRARMLQDQFSVSVNHVHALAILVSTFHYYRPSAIDQETFAEYTARTAFERPLL  
SGVAYAQRVVNSERERFEKEHGWVIKTMERKSSLVRDEYAPVIFAQETVSYLESLDMMSGEED  
RENILRARATGKAVLTSPFSLGSHHLGVVLTFFPVYKSKLPQKPTVEERIEATAGYVGGSFDFVE  
SLVKNLLGQLDGNQAILVNVYDITNYTNPLVMYGNLYEEGDMSLVHESKLDGDPYRKHQMIC  
RYHQKAPTNIWIALTTAFLFFVILFLVGILYAGNHIVKVEDDFHAMEELKVRAEAADIKSSQFL  
ATVSHEIRTPMNGILGMLALLLDTELSSTQRDYAQTAAQACGKALITLINEVLDRAKIEAGKLELE  
AVPFDLRSIIDDVLSLFSEKSRHKGLELAVFVSDKVPDIVMGDPGRFRQIITNLVGNVSKFTEQG  
HIFVKVHLADNRKSIMNGKHDTFLNGESDEVFHSISGDYHFKTLGCEAADERNNSWDNFKHLIAD  
EEYGLDSSRETMAACESSEQVTLRVCVEDTGIGIPFSAQDGIFMPFVQADSSTSRNYGGTGIGL  
SISKCLVELMGGQINFISRPQVGSTFSFTAACEAFKSSVTNKKKLELDLPSFRGMKVIVVDG  
KPVRAAVTRYHLKRLGILVKVANRISKAVALCGKSGSLKSGMFQPDIIIMVEKDTWITGEDGIFNT  
WKHNGRTIKMPKMILLATNISNAEFDKAKFTGFTDTVIMKPLRASMVAACLQQVLGMGKKRQL  
GKDMPNGFLHSLLYGKKILVDDNGVNRVAAGALKKFGADVKAESGKVALEMLQLPHNFD  
ACFMDIQMPMDGFEATSIRIMMESKANEEMNGSEWHVPILAMTADVILATYDKCVKCGMDG  
YVSKPFEENLYQEVAKFFKSKTISDS\*

>GmHK15 (Glyma02g09550.1)

LKMQNHPVALRLHDQMGSKRKYTFIAHRAWLPKFLLLWILLMALISWCIYSKMDDDTKVRR  
KEVLGSLCDQRARMLQDQFSVSVNHVHALAILVSTFHYYRPSAIDQETFAEYTARTAFERPLL  
SGVAYAQRVVNSERERFEKEHGWVIKTMERKSSLVRDEYAPVIFAQQTVSYLESIDMMSGEED  
RENILRARATGKAVLTSPFRLLGSHHLGVVLTFFPVYKSKLPQKPTVEERIEATAGYVGGSFDFVE  
SLVKNLLGQLDGNQAILVNVYDVTNYTNPLIMYGNQYQEGDMSLAHESKLDGDPYRKHQMIC  
RYHQKAPTNIWIALTTAFLFFVILFLVGILYSAGNHIVKVEDDFHEMQLKVRAEAADVAKSQFL  
ATVSHEIRTPMNGILGMLALLLDTELSSTQRDYAQTAAQACGKALITLINEVLDRAKIEAGKLELE  
AVPFDLRSIIDDVLSLFSEKSRHKGLELAVFVSDKVPDIVMGDPGRFRQIITNLVGNVSKFTEQG  
HIFVKVHLADNRKSMNGKHETFLNGESDEVFYISGDYHFKTLGCEAADERNNSWDNFKHLIA  
DKEYGLDSSRETMAACESSEQVTLRVCVEDTGIGIPFSAQDRIFMPFVQADSSTSRNYGGTGIG  
LSISKCLVELMGGQINFISRPQVGSTFSFTAACGAFKSSVTDKKNLELDLPSNFRGMKVIVVD  
GKPVRSVTRYHLKRLGILVKVANSISKAVALCGKTGSLTSGMFQPDIIIMVEKDTWISGEDGIFN  
IWKQNGRMFKMPKMILLATNIISA EFDKAKATGFTDTVIMKPLRASMVAACLQQVLGMGKRRQ  
LGKDMPNGFLHSLLYGKKILVDDNGVNRVAAGALKKFGADVKAESGKALEMLQLPHNFD  
DACFMDIQMPMDGFEATSIRIMMESKANEEMNGNEWHVPILAMTADVIHATYDKCMKCGM  
DGYVSKPFEENLYQEVAKFFKSKTMSDS\*

>GmHK16 (Glyma05g34310.1)

MALKLHEQAGSIRKYTFIAHRAWLPKFLMLWILLMALIGCFIYSKMDADTKVRRKEVLGSLCD  
QRARMLQDQFSVSVNHVHALAILVSTFHYYRTPSAIDQETFAEYTARTAFERPLLSGVAYAQRV  
VNSERGTFEKQHGWWIKTMEREPSLVRDEYAPVIFAQETLSYLESLDMMSGEEDRENILRARA  
TGKAVLTSPFNLLGSHHLGVVLTFFPVYKSKLPPKPTMEERIKATAGYVGGSFDFVESLVENLLGQ  
LAGHQAILVNVYDITNSTNPLIMYGNQNEEGDMSLVHESKLDGDPYRNHTMICRYHQKAPTNI  
WIALTTAFLFFVILLVGYILYAGNHIVKVEDDFHQMEELKVRAEAADVAKSQFLATVSHEIRT

PMNGILGMLGLLLKTELSSTQRDYAQTAQACGKALIALINEVLDRAKIEAGKLELEAVPFDIRSIL  
DDVLSLFSEKSRNKGLELAVFVSDKVPDIVMGDPGRFRQIVTNLVGNSVKFTERGHIFVKVHLS  
ENSMSTMNGKTEKFINRGSSEPVHMSGAYNSKTLGSGYEAADERNNSWDNFKHLIADEEFFFDA  
SVKKAASESYEQVTLMVSVEDTGIGIPFSAQDRIFMPFVQADSSTSRHYGGTGIGLSISKCLVEL  
MGGEISFISQLQVGSTFSFTAGFGTIEKNAITDMKKHNLEDLPSNFRGLKAIVVDGKPVRAAVTR  
YHLKRLGIQAKVANSINKAVSLCGKNGSLTSVLFQPDIFVEKDSWVCGEDEIFNVWQLDWKQN  
GHMFKIPQMILLATNIGNAEFDKAKAAGFSDTVIMKPLRASMVAACLQQVLGTGKKRQHGKDM  
KPNGSTLVRSLGCGKILVVDNVDNRRVAAGALKNFGADVTCAESGKTALEMLQLPHNFDA  
CFMDIQPEMDGFQATQRIRMMETKANEQQMNGEGNGWKDKYHIPILAMTADVIHATYDECV  
KYGMDGYVSKPFEEENLYQAVAKFFNPKPTT DNSLIENGR\*

>GmHK17 (Glyma08g05370.1)

MKSLRHHPMALKIHEQAGSKRKYTFIAHRAWLPKFLMLWILLMALIGCFIFSKMDADTKVRR  
KEVLGSLCDQARMLQDQFVSVNVHVALAILVSTFHYYRTPSAIDQETFAEYARTAFERPLL  
SGVAYAQRVNSERETFQKQHGWWIKTMERESLVRDEYAPVIFVQETLSYLESIDMMSGEED  
RENILRARATGKAVLTSFRLGSHHLGVVLTFPVYKSKLPPKPTMEERIKATAGYVGGSFVVE  
SLVENLLGQLAGHQAILVNVYDITNSTDHLIMYGNQNEEGDMSLVHESKLDGDSYRKHTMICR  
YHQAPTNIWIALTTAFLFFVILLVGYILYGAGNHIVKVEDDFHQMEELKVRAEAHVAKSQFL  
ATVSHEIRTPMNGILGMLGLLLKTELSSTQRDYAQTAQACGKALIALINEVLDRAKIEAGKLELE  
AVPFDIRSILDDVLSLFSEKSRNKGLELAVFVSDKVPDIVMGDPGRFRQIVTNLVGNSVKFTERG  
HVFVKVHLSENRMSTMNGKIEKFLNGGLDEPVHMSGGYNKTLGSGYEAADERNNSWDNFKHLI  
ADEEFFYDASVKRVAASESYEQVTLMVSVEDTGIGIPFSAQDRIFMPFVQADSSTSRHYGGTGIG  
LSISKCLVELMGGEISFISQPQVGSTFSFTADFGTIKNAITDMKKHNLEDLPSNFRGLKAIVVDG  
KPVRAAVTRYHLKRLGIQAKVANSFNKAVSLCGKNGCLTSGLFQPDIFVEKDSWVCGVEDGIFN  
VWQLDWKQNRHIFKIPQMILLATNIGNDEFD KAKAAGFSDTVIMKPLRASMVAACLQQVLGTG  
KKRQHGKDMNPNGSTFVRSLLCGKKILVVDNVDNRRVAAGALKNFGADVTCAESGKTALEM  
LQLPHNFDA CFMDIQPEMDGFQATQRIRMMETKANEQQMNGEGCGEGNGWKDKKYHIPILAM  
TADVIHATYDECVKCGMDGYVSKPFEEENLYQAVAKFFNPKPTS IQQNARTGKAT\*

>GmERS1 (Glyma19g40090.1)

MMESDCIDTQYPPDELLVKYQYISDVLIALAYFSIPVELIYFVQKS AFFPYRWVLMQFGAFIVLC  
GATHFINLWTFSPHSKAVAVVMTIAKVSCAIVSCATALMLVHIIPDLLSVKTRELFLKNKAEELD  
REMGLILTQEETGRHVRMLTHEIRSTLDRHTILKTTLVELGRTLGLEECALWMPSSRGLNLQLS  
HTLTYHVQVGSTVQTNPIVNEVFNSPRAMRIPPTCPLARIRPLVGRYVPPEVVAVRVPLLNLNSN  
FQINDWPDMSAKSYAIMVLILPTDSVRKWRDHELELDVVDQVAVALSHA AILEESMRARDQ  
LLEQVALDLARQEAEMAIHARNDFLAVMNHMRTPMHAIILSSLLLLETETPEQRVMIETVL  
KSSNVLATLINDVLDLSRLEDGSLELEKGFNLHGVLGEIVELIKPIASVKKLPITLILSPDLPTHAI  
GDEKRLTQTLN VVGNAV KFTKEGYVSVRVSVAKPESLQDWRPPEFY PASSDGHFYIRVQVKD  
SGCGIPPQEIPHLFTKFAQSRSGPARPSSGAGLGLAICKRFVNL MGGHIWIESEGPDKGSTATFI  
IKLEICGNPDPSDHQAANRSQAYS GSGGLARFKPFIKDEDDTGFSTRRNQRSF\*

>GmERS2 (Glyma03g37470.1)

MMESDCIDTQYPPDELLVKYQYISDVLIALAYFSIPVELIYFVQKS AFFPYRWVLMQFGAFIVLC  
GATHFINLWTFSPHSKSVAVVMTIAKVSCAIVSCATALMLVHIIPDLLSVKRRESILKNKAEELDR  
EMGLILTQEETGRHVRMLTHEIRSTLDRHTILKTTLVELGRTLGLEECALWMPSSRGLNLQLSH  
TLTYHVQVGSTVQTNPIVNEVFNSPQAMRIPPTCPLARIRPLVGRYVPPEVVAVRVPLLNLNSN  
QINDWPDISAKSYAIMVLILPTDSVRKWRDHELELDVVDQVAVALSHA AILEESMRARDQLM  
EQVALDLARREAEEMAIHARNDFLAVMNHMRTPMHAIILSSLLLLETETPEQRVMIETVLKS  
SNVLATLINDVLDLSRLEDGSLELEMGFNLHGVLGEIVELIKPIASVKKLPITLILSPDLPTHAI  
GDEKRLTQTLN VVGNAV KFTKEGYVSVRVSVAKPESLQDWRPPEFY PASSDGHFYIRVQVKDS  
GCGILPQDIPHLFTKFAQSRSGPARPSSGAGLGLAICKRFVNL MGGHIWIESEGLDKGSTATFIV  
KLGICGNPDPSDHQAANRSQAYS GSGGLARFKPFITDENDTGFSTRRNQRSF\*

>GmETR1 (Glyma09g00490.1)

MESCNCIDPQVPADDLLMKYQYISDFIALAYFSIPLELIYFVKKSAVFPYRWVLVQFGAFIVLCG  
ATHLINLWTFRIHSRTVAVVMTTAKVLTAVVSCATALMLVHIIPDLLSVKTRELFLKNKAEELDR

EMGLIRTQEETGRHVRMLTHEIRSTLDRHTILKTTLVLELGRTLALEECALWMPTRTGLELQLSYT  
LRQQNPVGYTVPPIHLPVINQVFSSNRAVKISPNCVVARLRPYAGKYMPGAVVAVRVPLHLHSNF  
QIYDWPEVSTRSYALMVLMLPSDSARQWHVHELELVEVVADQVAVALSHAAILEESMRARDQ  
LMEQNVALDLARREAETAIRARNDFLAVMNHMRTMPHAVIALSSLLQETDLTAEQRLMVETIL  
KSSNLLATLINDVLDLSRLEDGSLQLEATTFNLHSLFREVLNLIKPVASVKKLSLTSHIASDLPY  
AIGDEKRLMQTILNVVGNVAVKFSKEGCISISAFVAKPESFRDARIPDFLPVLSDNHFYLRVQVKD  
SGSGINPQDIPKIFTKFAQNQSLTTRNPAGSGLGLAICRRFVNLMEGHIWVESEGIGKGCTVTFI  
VKLGIPDRSNEFKLPFVPKVPGNHGSTNFAGLKVLVTDDNGVSRVTVKGLLMHLGCDVTTASS  
SEECLRVVLSLEHEVVFMVDCAGLDGYELAIRIHEKFTKHQDRPLIVALTGNTKKVTKENCMRVG  
MDGLILKPVSVDKMRGVLSSELLERRVLFETV\*

>GmETR2 (Glyma12g37050.1)

MESCNCIDPQVPADDLLMKYQYISDFFIALAYFSIPLELIYFVKKSAVFPYRWVLVQFGAFIVLCG  
ATHLINLWTFRIHSRTVAVVMTTAKVLTAVVSCATALMLVHIIPDLLSVKTRELFLKNKAAELDR  
EMGLIRTQEETGRHVRMLTHEIRSTLDRHTILKTTLVLELGRTLALEECALWMPTRTGLELQLSYT  
LRQQNPVGYTVPPIHLPVINQVFSSNRAVKISPNCVVARLRPYAGKYMPGAVVAVRVPLHLHSNF  
QIYDWPEVSTRSYALMVLMLPSDSARQWHVHELELVEVVADQVAVALSHAAILEESMRARDQ  
LIEQNVALDLARREAETAIRARNDFLAVMNHMRTMPHAVIALSSLLQETDLTAEQRLMVETIL  
KSSNLLATLINDVLDLSRLEDGSLQLEAATFNLHSLFREVLNLIKPVASVKKLSLTSHVASDLPM  
YAIGDEKRLMQTILNVVGNVAVKFSKEGCISITAFVAKPESFRDARIPDFLPVPSDNHFYLRVQVK  
DSGSGINPQDIPKLFKFAQNQSLTRNPAGSGLGLAICRRFVNLMEGHIWVESEGIGKGCTVTFI  
VKLGIPDRSNEFKLPFVPKVPGNHGSTNFAGLKVLVMDDNGVSRVTVKGLLMHLGCDVTTASS  
SEECLRVVLSLEHEVVFMVDCAGLDGYELAVRIHEKFTKHQDRPLIVALTGNTKKVTKENCMRV  
GMDGLILKPVSVDKMRGVLSSELLERRVLFESV\*

### cDNAs

>GmHK01 (Glyma03g37760.1)

AAAAGAAAGGTTTTATTTTTCTCACTACTGATTATGGTCAAGTTTTGGCAATGTA  
AACTCATCACTACTTTCCACTTCTTTGGGGTGCCTCAAATTTAAGCATATATTATATCCA  
GCCCGTAAATCGTGACACTGGAGAGTTATATGGGAAAGCCATAATATCTGAAGTACCATCT  
AATATTATCAATACAAGTTGGTTTGTGAAAGCAGTTAATAGTTCACTTAGTTATGCCTCATT  
GGGAACCAAGTGGAAACAATGATCATGATCTTCTATTTCGTTAGTTCATCTAGAATAAAGGGG  
ACACAAGTGATCTCTCTAGGCATTCCAGTAACTATCACTGATTTCTTCACTCCGGTTG  
GGGCGAATTTGTCTTTGGTTACCAAAGATGGAAAAATGCTTGTAGAAGGGATTCAAATAC  
TCGTTTGGGCTTCTCTAATGACATGGTTTATTTCCAATCAGTGAATGCAAATGGTGATCAA  
CAAGTTATGACGGCGTTGTTTTCATGCAAAGATGGAGATGCAGAAGCTGCCTCTATTTTGA  
TATTCAGGTTGCTTGTAGTATTTAATTCGCTGCTCCACCATTGATATAATGGAATAAATCGG  
TGTATGTTTTGGCTGTCCACGAAAAGGATTTGACCACCTTTGTTCTGGACATTAAGAAAA  
AGGATTTGGCACTATTGACAACAATGATTGTCATGATACTCATTGCCATGGTCAGTTTTCTAT  
ACATAAATGTTAGATCATTAAAGCGAGAAATGCATTTGTGTTGGTCACTCATCAAACAAA  
TGAAGCCACACAACAAGCTGAGCGAAAATGTATGAACAAGAGCCTTGCTTTTGCTAGTGC  
CAGCCATGATGTTTCGCGCTTCGCTGGCGGGCCTTACTGGTTTGATAGAAATGTCCTTTCAT  
GAAGTTTCTCCTGATTCTGAATTAGGAACCAACTTAAGACAAATGGATTCTTGTACCAAG  
ATTTACTAGGACTATTGAATTCTATACTTGATGCAAGTAAAGTTGAAGCTGGCAAATGCT  
GCTTGAGGAAGAGGAATTTGATGTATTTCACTCCTTGAAGATGTGGTTGATTTATACCATT  
CTGTGGCTATGAAGAAAGGAGTAGATATTGTGTTGGACCCTTGAATGGTTCTGTA  
ATATTCGCGCACGAAAGGCGACAGAGGAAAACCAACAAGTTTTGTGCAATTTACTGAG  
CAATGCTGTAAATTTACCGAGGAGGGGCACATAGCTGTTGAGCATGGGCTCAGAAGCC  
AAGCTTGCAGAGCTCAATGATTGCTACTACCAATACGGGTCCAGTAGACTTTTGTGCGCG  
TTGTGTTGCCGCAAAATGAAGCACGTGATGACGTGGAAGACTTGAACATCAAACAAGAT  
CAAATTTGATGGATTTACTATTGAAGTGGATGACACTGGCAAAGGAATTCCTAAAGAGA  
AGCACAAGTCTGTTTTGAAAATTATGTCCAAGTCAAAGAACTACTCTTGGCCAAGAAGG  
AACTGGCTTGGGACTTGGTATTGTTCACTGGTACGTTTGTGATGCATGGAGATATTGAA  
ATCATGGACAAGGATATTGGTAAAAGGGAACCTGCTTTAGGTTCAATGTTCTCCTCACTG  
CCCATGAGACACAGATGAATGATGACACAAGAGATGACCAAGCTGGATCAGGTAACAAA

AATCAATCTCATGGACTAACCATGAGTCCCAAGTTATCTATTTGGACCCGTAGTCCTAGAT  
CCGAGGCTTCTCGAGTTGTTTTATTGATTCAAATGAGGAGCGTCGAGGGACTACGCAGA  
GGTTCATGGAGAGGTTAGGGATCAAAGTTAAGGTTGTGAAGGAGTGGAGACAACCTTCATT  
ACACTCTGAAGAAGATCATCAAACAAAAGGGTCTCCATCAAATAGCTCAAGCTCGCCAG  
AGTCTTCAGATTCTCCCTCTGCATCAAGCTGCACAAACGGAGTCCCTTTGAGTGCACAAGA  
TGGAAC TAATTACATAAGTTCAATCTTCAAGAGAACAGATATTGAAGCTTCTCGGGTTTT  
GTCCTGATTGTGATTGATGCTAATGCAGGACCTTTTTTCAGAGCTTTGCAAAGTGGTAGCTG  
AGTTCAAAAGAGGCCTTTGTTATCCTTGTAGGGTGGTTTTGGTTGGAGAATCCACTTATACC  
TTCTGTGGACAACAAAATCCTTAACAAGGATGTTTCTAATTCTAATGACATTGTCTTGTCTA  
AGCCACTTCATGGTCATCGTTTATTCCAAGTCATAAGGATTCTCCCCGAGTATGGAGGTGT  
TTGGCCATGCAGTTCTAGTGAAACAAAGAAAGAAAAGGGTCAAGTTTCTTAACTGATGAA  
GGTGAATTCGACGTGTTGAACTACAAGAGTGTGGCAGCTCAAGCGTTACACAGCAATCT  
TATGATAGATCTAGAGCAAGAAAATCTCATATCCACCAAGGAGAAATACAAGAATGTGAA  
GAGTTAAGCAATGAAAAACCCTTGTGGGGTATGAAATGTTTGGTTGTTGAGGACGTTGTT  
TGTTACGTAGGATAACTAAGTCTACTCTTGTATCGGCTTGGTCTTGTCTGTCAATGTA  
GAATGGTGAACAAGCTGTTTCAGACAGTTGAAGAGGGTCTAACTAGGAATTTCTCCAATCGT  
CCATGTGATTTTCATCTTAATGGACTGCCAGATGCCGGTAATGGATGGATATGAGGCAACG  
AGACGGATAAGGGAGATTGAGAAGTCTCATGGTGTTCACATTCCTATCTTTGCATTAACAG  
CTAATACAGGGAAAGAGGCAATATTGTCCATTGAAGCTGGAATGGACGATCACTTAATCA  
AACCCATCAACAAGAGGCTTTACTTAAAGCCATCAAAGAATATATACTAAAGAGTGAAC  
AGTAAATCTTATCTTTTTTAATTGCTTTATATGATTGTTATCAAGTTTTTAAATTAACAATGA  
CAGGAGATATCTTTTTACACCACTAACTAGCCTATATA

>GmHK02 (Glyma04g06190.1)

ATGGAGAATGATTGTATAAAGGACATGGACATTGAGGTCGTTCTTCAATGTGGCCTGAAG  
ATATTGGAATGGAGGTTGGGAAGCAATTTAACATAGAAAAGCCTGGAAGGGACCAAGACA  
TGTTAGAGGAGGTTACAATCATAGAGGAGCCAATATAGTTGATTTCAAGCGCCTCATGGA  
GCTTACAAATTTTACAGAAAAGGGCTCTTCTCAGTTGGCCTACCTAATGAAACAATGGGAG  
TACAAACAGGCCAATGTTGTGCGTCTCCTCAGGGAAGAACTTGACAATCTAAGCAAGCAA  
AGGCAGGATGTTGAGCTCAGGAAGTTGAGATATTGGAAGAGCATCGATTCCGAGGAAGA  
ACGACATGGGGCAGATAAACGTCCAGTTTCTATATTGGATGATGTTTATGATGGTATATGG  
CAAGACATACCTTGCAGGAGAAGTGATGTTGTGGTTGAAAACAAGAGGAGTGAGATTGAT  
GCTGAGTATGACACTGTCATGTGCTGGAAACAGCGAGCGTTGCATTTCAGAGAAGCAGCTG  
GAGGCAAGTATCCAAGAGAACAGATACTCGAAGAAAAGTTGCAAGAAAGAATAGCAA  
CATTGAAAGGCAGTCCACCTGTGGAAGAATCTCCAGATACTGAAGAGGGCAGATAA  
TTTCTTGCATTTTATACTCCAAAATGCACCTATTGTTATTGGCCATCAGGACAAAGAATTGC  
GCTATTGCTTTATCTATAATCATTTTCCAAGTTTACAAGAGGAGGACATCATCGGAAAAAC  
CGATGTTGAAATATTCACGGGAGCTGGTGTAAAGGAAGCTCAAGAGTTTAAAGAGAGAGGT  
TTTGGAAAAGGATTACCTGCAAAAAGGGAAATCACTTTTGGAGACAGAATTTGGGTCA  
AAGACATTTTGTATATGTAGAACCTGTGTTTAGCAAAGCAGGGGAGACAATAGGAATAA  
ATTACATGGGAATGATATAACAGATCAGGTGAGAAAAAGAGAAAGGATGGCAAAGATTC  
GGGAAGAGATTGCTGTTTCAGAAAAGCCAAGGAAACAGA ACTGAATAAAACCATTACATTA  
CAGAGGAACTATGCGAGCAAAACAATGCTGGCAACAATGTCTCATGAGATAAGATCTC  
CATTGTCTGGGGTTGTTAGCATGGCTGAAATTCTTTCTAACACGAAACTCGATTGGGAGCA  
AAGACAACCTCGGATGTCATGCTATCTTCTGGAGATTTGGTTCTTCAACTTATAAATGACA  
TACTCGATCTTTCCAAGGTTGAGTCAGGAGTGATGAAATTGGAAGCTACAAAGTTCAGGCC  
AAGAGAGGTAGTCAGGCATGTACTCCAGATCGCTGCGGCCTCATTGCAAAAATACTAAC  
CTTAGAAGGACATGTAGCAGATGATGTGCCTATTGAGGTCATTGGTGATGTTTTAAGAATG  
CGGCAAATTTCTACAAATTTAATTAGCAATGCCATCAAGTTCACCCATGAAGGCAAAGTTG  
GAATAAATCTTTATGTTGTGTCAGAGCCTACTTTTGCAAAAGCAGAATGCATCCAAAAGAT  
GACTTCAAGCCATTCAACTATTTCAAGTGAATGCTGAAACAACAGTGTGGATACGTTGTGAT  
GTATATGACACAGGCATAGGAATACCAGAAGATGCTATACCAACCTTGTTTAAAAGGTACA  
TGCAAGTCAGTGCAGACCACACTCGAAAGTATGGTGGTACAGGGCTAGGACTAGCAATAT  
GCAAACAACCTGGTTGAGTTGATGGGGGGTCAACTAACAGTTTCTAGCAAAGAACACTATG  
GTTCTACTTTCACTTTCATACTTCCATACAAGGTTTCAATCGCTTGTGATCATTCTGATGATC  
TGGATGAGCTCTCTGACGTGGAGAATAATGATGCTGCATCTGATGATACAATAGAGAGTTT  
CTTCCAATTCCAACCACGCACTTTGGGCTCTTTTTCTCATCTAATGGATCTAGCAGGACAC



ATAAGTTATTAACACACAAAATTGGCTACACCAGCTCACATAAGCTTGGTGGATTTTCTGA  
GAGTTTGTATTCAATCCCCTCCAATGATATCATGTCAAAGGGACATGTTTCAGCTGATGAT  
GCATCTTCTGTGGTTGAGGTTCCAGAGATGTCTGAATCGGCTAGTTCATCTGGTACAGCC  
AAAAAACTAAGTCAAATGGAGAAATGTCTGAAGCAAAGGTCATGGGAAGACAAACACAAC  
TTTCCAATGCGTTACAAACAGCAATCCTTCTTGTGAAGATAACAAGATTAATGTCATGGTG  
ACACAGTCCATGATGAAACAATTAGGCCATAGCATAGATGTTGTGAACAATGGAGTGAA  
GCCGTACGTGCAGTTCAGCGTCACACTTATGACCTGATTCTGATGGATGTCTGCATGCCAG  
TTATGAATGGTCTTCAGGCAACAAAAGTATTGCGACTTTTGAGGAAACAGGCAATTGGGA  
TGCTGCAAGAAATGCTGGAATCGAGCAAAGTGTACAAGATCCAGATTGTGAATGTTCTGTA  
CCATCTACAAAGCGGATCCCATTGTTGCGATGACAGCAAATGCTTTGTGAGAGAGTGCT  
GAAGAGTGTGTTGCAAATGGTATGGACTCGTTTGTGTCAAACCTGTGGCATTCCAAAAAC  
TGAAAGAATGATTGAACAATACCTTGTAATTTTCAGCTAG

>GmHK03 (Glyma14g12330.1)

ATGGTTTGCAGAGATGGAGAGTGACTGTATTGAGGACATGGACATTGAAGTCCTCTCTTCAA  
TGTGGCCTGAAGATATTGGCACTGATGTTGGAAAACAGTTCAATATAGAAAAGCCTGGAA  
GAGACCAGGATATGTTGGAGGAAGTCACAATCATAGAGGAGCCAATATAGCTGATTTCC  
AGCGTCTCATGGAGCTTACAAATTACACAGATAAAGGGTCTTCTCAGCTGGCATACTCAT  
GAAACACTGGGAGTATAAGCAGGCTAACGCGGTTCCGCTTCTCAGAGAGGAACTTGACAA  
CCTTAGCAAACAAGGAAGGAAGTTGAGCTCAGGAAGTTGGAGATACTCAAAGCACTCG  
GTTTCAGGAAGAGAATTATGGCGGTGACAAGCGCCCAGTTTCTATATTGGATGAGGTGTA  
CTATACATGGCAAGATGTGCCCGTGCCATTAAGGAAAAGTAATATAGTTGTGCAAACCAA  
GAGGATTGAAATTGATGCTGAGTATGATACTGTTGTGATTGGAAACAACGGGCGCTGCA  
GTTGGAAAGACAGTTGGAGGCAAGTGTGCAGAGGGAGCAGATACTAATGGACAAGTTGG  
AAGAAAGTGTAAAGAATCTTGAAAGGCAGTCTTCCACTGTGGAAGAACTATCTCAGATTCT  
GAAGAGAGCAGATAATTTCTTACATTTTATTCTCCAAAATGCACCTGTTGTTATTGGCCATC  
AGGACAAAGAGTTGCGCTATCGCTTATCTACAATCATTTTCCGAGTTTACAAGAGGAGGA  
CATCATAGGAAAAACAGATGTTGAAATTTTACAGGATCCGGTGTTAAGGAATCTCAGGAT  
TTCAAGAGGGAAGTAATGGA AAAAGGGTTGCCTGCAAAAAGGAAATTACTTTTGAGACA  
GAATTATTTGGGTCAAAGACATTCTTGATATATGTAGAACCTGTCTTTAGCAAAGCAGGAG  
AGACAATTGGAGTAAACTACATGGGAATGGAATAACAGATCAGGTAAGAAAAAGAGAAA  
GAATGGCAAAGCTCAGGGAAGAGATTGCAGTCCAGAAAGCAAAGGAAACAGAACTTAAT  
AAAACCATTACATTACAGAGGAGACTATGAGAGCAAACAATGCTGGCAACAATGTCT  
CATGAGATAAGATCTCCTCTGTCTGGAGTTGTTAGCATGGCTGAAATTCTTTCCACCACGA  
AACTTGATCGGGAGCAAAGGCAGCTCTTGAATGTCATGATATCTTCAGGAGATTTGGTTCT  
TCAGCTTATAAATGACATTCTTGATCTTCCAAGGTTGAGTCAGGAGTTATGAAATTGGAA  
GCTACAAAATCCGGCCAAGAGAGGTAGTAAAGCATGTACTCCAGACAGCTGCAGCTTCA  
TTGCAGAAAATGTTAACCTTAGAAGGAAATGTGGCAGATGATATGCCTATTGAGGTCAATG  
GAGATGTTTTAAGGATTCGGCAGATTCTACAAATTTAGTCAGCAATGCGGTAAGTTTTAC  
ACATGAAGGCCAAAAGTTGGAATAAACCTTTATGTCGTTCCAGAACCACCTTTTGCCAAAGCA  
GAAGGCCATCAAAGATGATCACAGAACAGTCAACAAAATTCAGCAAATGGGGTGAAGGA  
AGAGAAACGTGCATCAACGCCGGAAGCAGCAGCGATCAAATTTGCTTGATGTTAAAAG  
TGAATGCTCAATGAATGGAGATACTGAGGAGCAAACGCATTCAACTGAAACTGTGTGGAT  
ACGTTGTGATGTATATGACACAGGAATCGGAATACCTGAAAAGGCTATACCTACTTTATTT  
AGAAGGTACATGCAAGTAAGTGCTGATCATGCTCGAAAGTATGGTGGCACAGGGCTGGGA  
CTAGCAATATGCAAACAGCTGGTTGAGTTAATGGGGGGTGCCTAACAGTACTAGCAA  
GAACATGTTGGTTCTACCTTCACATTCATACTTCTTACAAGGTTTCAACAGCTTGTGATGA  
TTCTGATGACCCAGATGAGCTCTCAGATGTGGATGATAATGATGATGACACAACAGAGGG  
GTTCTTCCAATTCCAACCACGCACTTTGGGCTCTCTTCACTTCTAATGGACCTACCAGGC  
CCAAAATATACTACCAGGTTTCCAGAAGCTCACACAAGTTCAATGGCATTTCAGAAAATTC  
TACTCATTCTCACTACCAACACAAGATCAAAGGGATTAAGATGTCTGAATCAACAAGT  
TCATCAAGTCACAGCCCAGAAACAAGCAAGAAAGGCCTAAGATTCTTCTTGTGAAGAT  
AACAAAATCAATGTCATGGTGACACAGTCAATGATGAAGAGGTTAGGCTATAGCATGGAT  
GTTGTGAATAATGGAGTGGAAGCCGTACGTGCAGTTCAGCACCATACTTATGATATCATAT  
TGATGGATGTTTACATGCCAGTTATGAATGGTCTTCAAACAACAAAAGTATTGCGTCTTAT  
GAGGACACGGGCAATTGGGAAGCTGCAAGAAAAGCTGGGATAGAACAATTAATTTGTCTT  
CTTGTGCACTACATCGAATCTAGAAGACAAGAACTCCAACATGTTAACTTGATAAACATG

CAGACAAGAAACCTTACTACACTCAATTATTTAAACAACATCACCAGACAAAGAATATGC  
CACTTGCCACCCTCAATGTAGCATGATGACAGCAAACACAATGTCAGAGAGTGCTGAGGA  
ATGTTATGCAAATGGTATGGACTCGTTTGTGTCAAACCTGTGACATTCCAAAAATTGAAA  
GATTGTCTAGAACAGTACCTGAGGTGA

>GmHK04 (Glyma17g33670.1)

ATGGTTTGTGAGATGGAGAGTGATTGTATTGAGGACATGGACATTGAAGTCCTCTCTTCAA  
TGTGGCCTGAAGATATTGGCACTGATGTTGGAAAACAGTTCAATATAGAAAAGCCTGGAA  
GAGACCAAGATATGTTGGAGGAAGTCACAATCATAGAGGAGCCAACATAGCTGATTTCC  
AGCGTCTCATGGAGCTTACAAATTACACAGATAAAGGGTCTTCTCAGCTGGCATACTCAT  
GCAACACTGGGAGTATAAGCAGGCTAACGCGTTCGGCTTCTCAGAGAGGAACTTGACAA  
CCTTAGTAAACAAGGAAGGAAGTTGAGCTCAGGAAGTTGGAGATACTGAAAGACAATCG  
GTTTCGAGGAAGAGAATTATGGTGGTGACAAGCGCCAGTTTCTATATTGGATGAGGTTTAC  
TATACATGGCAGGATGTGCCAGTGCCACTAAGGAAAAGTGATGTGGTTGTGCAAAACAAG  
AGGATTGAAATTGAAGCTGAGTATGACACTGTTGTGTATTGGAAACAGCGGGCGCTGCAG  
TTGAAAAACAGTTGGAGGCAAGTGTCCAGAGGGAGCAGATACTAATGGACAAGTTGCAA  
GAAAGTGTAAAGAATCTTGAAAGGCAGTCTTACCTGTGGAAGAATCTCAGATTCTGA  
AGAGAGCAGATAATTTCTTACATTTTATTCTCCAAAATGCACCTGTTGTTATTGGCCATCAG  
GACAAAGAGTTGCGCTATCGCTTTATCTACAATCATTTTCCGAGTTTACAAGAGGAGGACA  
TCATAGGAAAAACAGATGTTGAAATTTTACAGGATCCGGTGTTAAGGAATCCCAAGATTT  
CAAGAGGGAAGTAATGGAAAAAGGGTTGCCTGCAAAAAAAGAAATTAATTTGAGACAGA  
ATTATTTGGGTCAAAGACATTCTTGATATACGTAGAACCTGTCTTTAGCAAAGCAGGAGAG  
ACAATTGGAGTAACTATATGGGAATGGAAATAACAGATCAGGTAAGAAAAAGAGAAAGA  
ATGGCAAAGCTTAGGGAAGATATTGCAGTCCAGAAAGCAAAGGAAACAGAACTTAATAAA  
ACCATTACATTACAGAGGAGACTATGAGAGCAAACAATGCTGGCAACAATGTCTCAT  
GAGATAAGATCTCCACTGTCTGGAGTTGTCAGCATGGCTGAGATTCTTCCACCACGAAAC  
TCGATCGGGAGCAAAGGCAGCTCTTGAATGTCATGATATCTTCTGGAGATTTGGTTCTTCA  
ACTTATAAATGACATTCTTGATCTTTCCAAGTTGAGTCAGGAGTTATGAAATTGGAAGCTA  
CCAAATTCGGCCAAGAGAGGTAGTAAAGCATGTAATCCAGACAGCTGCAGCATCATTGC  
AGAAAATATTAACCTTAGAAGGAAATGTGGCAGATGATATACCTGTTGAGGTCATTGGAGA  
TGTTTTAAGGATTCGGCAGATTCTCACAAATTTAGTCAGCAATGCAGTAAAGTTTACACAT  
GAAGGCAAAGTTGGCATAAACCTGTACGTTGTTACAGAACCACCTTTTGCCAAAGCAGAA  
GGCCATCAAAGATGATCACAGAACAGTCTACAAATTCAGCAAATGGGGTGAAGGAAGA  
GAAACGTGCATCAACGCCGCGAAGCAACGATGATCAAATTTGTCTTGATGTCAATGATGA  
ATGCAGATCTTCAGTTAAAAGTGAATGCTCAATAAATGGAGATACTGAGGAGCAAACGCA  
TTCAACTGAACTGTGTGGATACGTTGTGATGTATATGACACAGGAATTGGAATACCAGAA  
AAGGCTATACCTACTTTATTTAGAAGGTACATGCAAGTAAAGTGTGATCATGCTCGAAAGT  
ATGGTGGCACAGGGCTGGGACTAGCAATATGCAAACAGCTGGTTGAGTTAATGGGGGGTC  
GTTTAAACAGTACTAGCAAAGAACATTGTGGTTCTACCTTACATTCATACTTCCATAAAG  
GTTTCAACAGTACTGATGATTCTGATGATGATGATGATGATGATGATGATGATGATGATGAT  
ATGACGATACAACAGAAGGCTTCTTCCAATTCACCTCGCACTTTGGGCTCTCTCTTCTCT  
TCTAATGGACCTACCAGGCCACAAAATGTACTACCGGATTGAGAAGCTCACACAACCTT  
AATGGTTTTTCAGAGAATTCTTCTCATTCTCACTACCAACATAATATCAAAGGGACTAA  
TTCAACCGAGGATGCTTCTTCACTCATTGTTGATGCTCCAGAGATGTCTGAATCAACAGGT  
TCATCAAGTCACAGCCCTCAAACAAGCATGAAAATGTAGTTAACACAACAACCAAGAAAT  
CAAGATAAGGCACATGCTCGGTTACAGAATGGTAGTGTAGACTCTTCTCAACATAAGGAG  
GCAATGACTCTAGGAACAATGTCAAGTGAACCACAACAACATGTCAAGGTCAAGTGAAG  
ACAGACATAACCTCCCAAAGTGTTATTAAGAGTAATAAATATACATCATCAGAAGTAACCA  
AATCCACATTAGGGCCTAAGATTCTTCTTGTGTTGAAGATAACAAGATCAATGTCATGGTGAC  
ACAGTCAATGATGAAGAGGTTAGGATACGGCATGGATGTTGTGAATAATGGAGTGAAGC  
CGTACGTGCAGTGCAGCGCCATACTTATGATGTCATTTTGTGATGGATGTTTACATGCCAGTT  
ATGAATGGTCTTCAAACAACAACAACTGATTCGGTCTTATGAGGAAACAGGCAATTGGGAA  
GCTGCAAGAGAAGCTGGAATTGAACAATGTTACCAGCTTCAAATGAATGTTCTGTACCAC  
TAAAAACCGGATCCACATCATTGCGATGACAGCAAACACAATGTCAGAGAGTGCTGACG  
AATGTTATGCAAATGGTATGGACTCATTTGTGTCAAACCTGTGACATTCCAAAACTGAA  
AGATTGTCTAGAACAGTACCTGAGGTGAGGTGAATCAATCCATGTAATTTCCGCTTGTGT  
ATAAATAGAATAAGAGCCTAGGAAAGTTTTGCAACAATGAATCATGTTCTCTCTCTCAT

CATCAGTGTCTACCTTAAAAATTGTATAGATCTACAATATTGTTTTTTTTTTAATCTCTCCG  
AATGCATAATAGCTATTTAGAAAGCTAGTTGGAGCGTGCAATGTAGTAGAGGTACATAACA  
TAAGCCTTTCTATATTATGGCTATGTATTGGGAGTTTTGGCAAATATTGGCACTACAAGAA  
ATCATAAGAGACAACCCTTTTG

>GmHK05 (Glyma06g06240.1)

ATGGAGAATGATTCTATAGAGGACATGGACATTGAAGCCCTTCCTTCAATGTGGCCTCAAG  
ATATTGGAACCGAGGTTGGGAAGCAGTTAATATAGAAAAGGCTGGAAGGGACCAAGACA  
TGTTAGAGGAGGTTACAATCATAGAGGAGCCAATATAGTTGATTTCAAGCGTCTCATGGA  
GCTTACAGATTTTACAGAAAAGGGCTCTTCTCAGTTGGCATATCTAATGAAGCAATGGGAG  
TACAAACAGGCCAGTGTGCGTCTTCTCAGAGAAGAACTTGACAACCTAAGCAAGCAA  
AGGCAGGATGCTGAGCTCAGGAAGAAAAGTGATGTTGTGGACAAGAGTTGCGCTATTGC  
TTTATCTATAATCATTTCGAAGTTTACAAGAGGAGGATATCATAGGAAAAACCGATGTTGA  
AATATTCACGGGAGCTGGTGTTAAGGAAGCTCAAGAATTTAAGAGAGAAGTTTTGGAAAA  
AGGATTACCTGCAAAAAGGGAAATCACTTTTGAGACAGAACTATTTGGGTCAAAGACATTT  
TTGATATATGTAGACCTGTGTTTAGCAAAGCAGGGGAGACAATTGGAATAAATTACATGG  
GAATGGATATAACAGATCAGGTGAGAAAAAGAGAAAGGATGGCAAAGATTCGGGAAGAG  
ATTGCTGTTTCAGAAAGCCAAGGAAACAGAACTGAATAAAACCATTCAAATTACAGAGGAG  
ACTATGCGAGCAAAACAAATGTTGGCAACAATGTCTCATGAGATAAGATCTCCATTGTCTG  
GGGTTGTTAGCATGGCTGAAATCTTTCTAACACAAAACCTCGATTGGGAGCAAAGACAAC  
CCTGGATGTCATGCTATCTTCTGGAGATTTGGTTCTTCAAATTATAAATGACATACTTGATC  
TTTCCAAGGTCGAGTCAGGAGTGATGAAATTGGAAGCTACAAAATTCGGCCAAGAGAGG  
TAGTCAAGCATGTACTCCAGACCGCTGTGGTTTCATTGCAGAAAATATTAACCTTAGAAGG  
ACATGTAGCAGATGATGTACCTATTGAGGTCATTGGTGATGTTTTAAGGATGCGGCAAAT  
CTCACAATTTAATTAGCAATGCCATCAAGTTTACCCATGAAGGCAGAGTTGGAATAAACC  
TTTACGTTGTGCCAAAGCCTAATTTGCAAAAAGCAGAAGACATCCAATGATGACTCCAAA  
CCAATCAACTATGTCAGTGAATGACACTGAGGAGCAACCTTATTCAGCTGAAACAACGGT  
GTGGATACGTTGTGATGTATATGACACAGGCATAGGAATACCAGAAGATGCTATACCAAC  
CTTATTTAAAAGGTACATGCAAGTCAAGTGCAGACCACACTCGAAAGTATGGTGGCACAGG  
GCTAGGACTAGCAATATGCAAACAACCTGGTTGAGTTGATGGGGGTCAACTAACAGTTTC  
TAGCAAAGAACACTATGGTTCTACTTTCACTTTCACTTCTCCATACAAGGTTTCAATCGCTT  
GTGATCATTCTGATGATCCGGATGAGCTTTCTGATTTGGAGAATAATGATGTGCGCATCTGA  
TGATACAATAGAGAGTTTCTTCCAATTCCAACCACGCACTTTGGGCTCTCTTTTCTTCTA  
ATGGATCTAGCAGGACACAGAAGTTATTAACACACAAAATTGGCTACACCAGCTCACATA  
AACTTGGTGGATTTTCTGAGAGTTTATATTCATTCCCCTCCAATGATATCATGTCAAAGGG  
ACATGTTCAAGTTGATGATGCATCTTCTGTGCATCAAGATAAGGCTCGTGCTTGGTCTTTAA  
TGGTTATGCAGATTCCTCTGAAGTTACTGTGTCAAACGGAGAAATGGCTGGAGCAACAAA  
CAGCACATCAGAAGTAACCAATCCACAATAAAGCCTAAGATCCTTCTTGTGAAGATAAC  
AAGATTAATGTCATGGTGACACAGTCCATGATGAAGCAATTAGGCCATAGCATAGATGTTG  
TGAACAAATGGAGTGGAAAGCAGTACGTGAGCTTCAAGCAACAAAACCTGATTGACCTGTA  
TGGATGTCTGATGCCAGTTATGGATGGTCTTCAAGCAACAAAACCTGATTGCGACTTTTGA  
GGAAACAGGCAATTGTGATGCTGCAAGAAGTGTGGAATTGAGGAAAGTCTACCAGATCA  
AGATTATGAATGTTATGTACCATTTACAAAGCGGGTCCCATTGTTGCGATGACAGCAAAT  
GCTTTGTCAGAGAGTGCTGAAGAGTGTGTTTCAAATGGTATGGACTCATTTGTGTCAAAC  
CTGTGACTTTCCAAAACCTTAAAGAATGTATTGAACAATACCTTGTAATTTTCAAGCTAG

>GmHK06 (Glyma06g06180.1)

ATGTAAGGAAACAGCGAGCGTTGCATTCAGAGAAGCAGCTGGAGGCAAGTATCCAAAG  
AGAAGAGATACTTGAAGAAAAGTTGCATGAAAGAATAGCAAACATTGAAAGGCAGTCCTC  
TCCTGTGGAAGAACTCTCCAGATCCTGAAGAGAGCAGATAATTTCTTGCAATTTATACTC  
CAAATGCACCTGTTGTTATTGGCCATCAGGACAAAGAGTTGCGCTATTGCTTTATCTATA  
ATCATTTTCCAAGTTTACACGAGGAGGATATCATAGGAAAAACCGATGTTGAAATATTCAC  
GGGAGCTGGTGTTAAGGAAGCTCAAGAATTTAAGAGAGAAGTTTTGGAAAAAGGATTACC  
TGCAAAAAGGGAAATCACTTTTGAAGACAGAACTATTTGGGTCAAAGACATTTTTGATATAT  
GTAGAGCCTGTGTTTAGCAAAGCAGGGGAGACAATTGGAATAAATTACATGGGAATGGAT  
ATAACAGATCAGGTGAGAAAAAGAGAAAGGATGGCAAAGATTCGGGAAGAGATTGCTGTT  
CAGAAAGCCAAGGAAACAGAACTGAATAAAACCATTACATTACAGAGGAGACTATGCGA  
GCAAAAACAATGTTGGCAACAATGTCTCATGAGATAAGATCTCCATTGTCTGGGGTTGTTA

GCATGGCTGAAATTCTTTCTAACACAAAACCTCGATTGGGAGCAAAGACAACCTCCTGGATGT  
CATGCTATCTTCTGGAGATTTGGTTCTTCAAATTATAAATGACATACTTGATCTTTCCAAGG  
TCGAGTCAGGAGTGATGAAATTGGAAGCTACAAAATTCCGGCCAAGAGAGGTAGTCAAGC  
ATGTA CTCCAGACCGCTGTGGTTTCATTGCAGAAAATATTAACCTTAGAAGGACATGTAGC  
AGATGATGTACCTATTGAGGTCATTGGTGATGTTTTAAGGATGCGGCAAATTCTCACAAAT  
TTAATTAGCAATGCCATCAAGTTTACCCATGAAGGCAGAGTTGGAATAAACCTTTACGTTG  
TGCCAAAGCCTAATTTTGAAAAGCAGAAGACATCCAAATGATGACTCCAAACCAATCAA  
CTATGTCAGTGAATGACACTGAGGAGCAACCTTATTCAGCTGAAACAACGGTGTGGATAC  
GTTGTGATGTATATGACACAGGCATAGGAATACCAGAAGATGCTATACCAACCTTATTTAA  
AAGGTACATGCAAGTCAGTGCAGACCACACTCGAAAGTATGGTGGCACAGGGCTAGGAC  
TAGCAATATGCAAACAACCTGGTTGAGTTGATGGGGGGTCAACTAACAGTTTCTAGCAAAG  
AACACTATGGTTCTACTTTCACTTTCACTTTCCATACAAGTTTCAATCGCTTGTGATCATA  
ATAATGATGTCGCATCTGATGATAACAATAGAGAGTTTCTTCCAATCCAACCACGCACTTT  
GGGCTCTCTTTCTCTTCTAATGCACCTTGGGCTCTCTTTCTCTTCTAATGGATCTAGCAGG  
ACACAGA ACTCATTCACTCCCTCCAATGATATCATGTCAAAGGGACATGTTCAAGTTGAT  
GATGCATCTTCTGTGGTTGATGCTCCGGAGACGTCTGAATTGGCTAGTTCATCTGGTACA  
GCCTAGAAACAAGAACA AAAAGTTTGGGTCAAGGGAAGGCAAACACA ACTACTCAATGTG  
TTACAAGCAGCAGCACATCAGAAGTAACCAAATCCACAATAAAGCCTAAGATCCTTCTTGT  
TGAAGATAACAAGATTAATGTCATGGTGACACAGTCCATGATGAAGCAATTAGGCCATAG  
CATAGATGTTGTGAACAATGGAGTGGAGCAGTACGTGCAGTTCAGCGCCACACTTATGA  
CCTGATTCTGATGGATGTCTGCATGCCAGTTATGGATGGTCTTCAAGCAACAAAACCTGATT  
CGGACTTTTGAGGAAACAGGCAATTGTGATGCTGCAAGAAGTTCGGGAATTGAGGAAAGT  
CTACCAGATCCAGATTATGAATGTTATGTACCATTTACAAAGCGGGTCCCATTGTTGCGA  
TGACAGCAAATGCTTTGTGAGAGAGTGTGAAGAGTGTGTTTGCAAATGGTATGGACTCATT  
TGTGTCAAACCTGTGACTTTCAA AAAACCTGAAAGAATGTATTGAACAATACCTTGTA AAT  
TCAGCTAG

>GmHK07 (Glyma01g36950.1)

GCTCAACCTCTCCAATGGGTAGCAAGTGCAGATACTTGTTTCATAGATTATGCGCTTGTGC  
CACTTCATGGAACAAAACAGCACCCCAAAGGGTCAAGAATTTTCCACAGAGATGTGGA  
AAAAGAAGAATTCAGTATGCTAGTAGTCACTGTCTCTTCTCTACTATAGTGTGTTTGTGG  
TTCGACTAGCAATCATGGTGATGCTAGCCATCTTGATTGGGTTGCTCACTATACTGACATG  
GCATTTACCAAGATTTATACAGCAAAATCACTTAGCAGTTTGGCATATGGTTGCGTTATG  
AACTTCTGCAACGCCCTGTTTTGAGGATGTGGAATATTTAAACTCTACTTCTGAAATTACT  
ACAGCTCAAGTCAAACCTGTCTCAGTATGTGATAAGACGTACAGCAACCCTGCGACTCAA  
GCAGAGCAAGTTGAGCTGTATGAAGCGATGAGGGCTGTAACATGGGCGTTATTTGCTAGT  
CGGAAAGCTCTAAACTCTATAACTATCAACTATAAGAACGGATTTGTTCAAGCATTCCATA  
GAGATCTGAAGGACAACAACACATTTTACATCTATTCTGATCTTTCAAATTACTCCATGGGT  
GCTAGCAACTCTAATGCGGTCAATTCATTTCAAAGTATCGAGCTTGGGATGTTGCGTGGTA  
ACTATTCTGCAATCTGGTACCGTGAACCACTTGACCCTGTGAGTGGTGAGAAGATTGGAAA  
AGCTATGAAAATTGCACCTGAAGACTTGATCAACATAGCTGGCCTTTCCAAGTCCCTGAT  
GGCGTAGCTTCGTGGCACGTGCGGGTGAGCAAGTTCACAGATTCACCATTGCTTTACAGCA  
GCATTACCAGTTTGGGACTCTTCTAATAAGACTATTATGGCAGTTGTGGGGTAACAACCTG  
CACTTTATAGTGTAGGACAATTAATGAGAGAGCTAGTTGAGATGCACAGTGGCCATATGTA  
TTTGACATCTCAAGAGGGTTATTTACTCGCAACTTCCACAAGTGCACCTCTACTGGCAACT  
TCAACAAAGCCTCCTAAGCTTAAGATGGCTGTTGACTGTGAAGACAACGTGATTGACTG  
GGAGCTGAGTGGTTACAGAGAACTTATGGGAACAATTTTCTCCAAGTCATGACATTCATG  
TAGAGAATGTCAAGCTAGGCCACCAGAGATATTACATTGACTCATTGCTCCTAAATTTGAA  
GAGACTTCTTTGGTAGGTGTGATCATCATACCAAGAAAGTATATCATGGGGCAGGTAGAT  
GAAAGAGCCTACAAAACGTTGGTTATTCTGATATCTGCGTCATTATGTATTTTAGTCATTGG  
ATGCGTTTTGCATTTTGTATTTGACAAATGGAGTATCAAAGGAAATGAATCTAAGAGCAGAA  
CTGATAAATCAACTGGAAGCAAGAAGAAAAGCAGAGGCATCAAGTAACTATAAAAAGTCAA  
TTCTTGCAAACATGAGTCATGAACTGAGGACACCTATGGCAGCAGTTATTGGGTTGCTTG  
ACATTCTTATATCAGATGACTGTCTCAAAATGAACAATATTCAACAGTTACTCAAATAAGA  
AAATGCTCAACTGCTCTGCTCCGCTTCTTAATAACATATTGGATCTGAGTAAGGTGGAAT  
CTGGA AAAACTGGTCTAGAAAGATGCCGAATTTGACTTGGGAAGGGA ACTTGAAGGGCTTG  
TAGATATGTTTTCTGTTCAAGTGCATTAACCATAATGTGGAGACTGTTTTAGACCTGTCTGAT

GACATGCCAAAGTTAGTTAAGGGTGATTCTGCAAGGGTGGTTCAAATATTTGCAAATCTGA  
TCAACAATTCAATCAAGTTTACTCCATCGGGTCATATTATTCTGCGAGGATGGTGTGAAAA  
CCCAAATTTCTCCATTGGTAGTCCAAATTTTCTCTTGACCAGAAGAAATCACGGAGTCTA  
CAAAGTGCAGAGAGAGGGCCAAATGCAACCATGCTAAGAGAACATCTATAAAAGATAAG  
AAAGTGATACTTTGGTTTGAAGTTGACGACACAGGCTGTGGTATTGACCCAAGCAAATGG  
GATTCTGTGTTTGAAGCTTTGAGCAAGCTGATCCATCAACTACACGACTGCATGGAGGCA  
CTGGTCTTGGTCTTTGCATTGTGAGAACTTGGTTAACAAGATGGGTGGAGACATCAGGGT  
TGTCAAAAGGAGGGCTCAGGAACACTGATGCGATTATGCTTGCTTCTCAGTGAGCCAAT  
GGATGTCACAGAACAACAGTGTGCAGTAGATTTGACAGACAATGGCTTAGTGGTACTGCT  
TGCACTGCATGGCAACATGAGTCGATTAATTACATCCAAGTGGCTACAGAAAAACGGGGT  
GTGCACAATGGAAGCATCTGACTGGAACGGACTAACTCAAATTTTGAGGGAACCTTTTCAT  
GCAAGAAGTTCAGTTCATAACTGACTTTGATGCACACTATCCAGCAAAAGAGGAATTGA  
AGTCTAACTACTCAACATAGGAGATATGAGGAACCCGGTTTTTGTCAATTGTTGTTGACATT  
GGACTACTTGATTTGAGTACAGATATATGGAAGGAACAGTTTAACTTCTTCCACAGGTACT  
TTGGTAGAGCAAAGTTTGTATGGATGCTAAATCATGACACTTCCAATACCGTAAAGATGGA  
GCTCCGTAGGAAAAGGGCATGTACTTATGGTCAACAAACCCCTTTACAAAGCAAAAATGATT  
CAAATTTTGGAAAGCTGTCATAAAGGAGAGAAATCTTGAGCTACAAAAGAAAAACATGACT  
GCTCCAAGGACCACAATGAAAGAGGGTGATTTGCATGAGTTTCTTGAGATTGATTCCACTC  
ATTTTGATGGTGCTAGCTCTGATGATTCTGACATACCTGAAACAGGTGGTTCTAATCCTGTT  
AGTGCTAATGGAGATAAACCAGCTGAGAAGCTAGCCAAATCTCATGCCTCATCACCATAC  
CATATGAATAACTGCCTAGAGGAAGATTCTGAATGTGGGGAAACAAATACGGTCAACCAGC  
TCAAGTAAAGCAGTAGATGGAAAAAATCTCTTGAGGGCCTAAAGATTTTGCTTGAGAA  
GATACACCAGTACTTCAAAGGGTTGCTACCATAATGCTTGAAAAAATGGGAGCTGATGTTG  
TTGCTGTAGGTGATGGACAACAGGCAGTAGATGCTCTCAATTGCATGTTGCTGCTGAAGA  
TTGTAGAAGGGAATCACTCCAGAAGGAAAGAAACACGAGATCTCAAACAGAGATTTGAC  
TTGTCGTCCTTATGACTTGATCCTAATGGATTGTCAGATGCCAAAGATGGATGGTTATGAG  
GCAACAAAAGCAATAAGGAAATCAGAAGTGGGAACAAGCATGCACATTCCCATTGTTGCT  
CTTACAGCACATGCAATGTCATGTGATGAAGCCAAATGCCTGGAGGTGGGCATGGATGCT  
TACTTAACAAAGCCAATAGACTTCAAATGATGGTGTCCACCATTCTTCACTACTAAAA  
GAACATCTTGA

>GmHK08 (Glyma11g08310.1)

ATGGGTAGCAAGTGCAGATACTTGTTCATAGATTATGCGGTTGTGACACTTCATGGAACA  
AAAACAGCACCCCAAAGAGTGAAGAATTTCCACAGAGATGTGGAAAAAGAAGAATTCC  
AGTATGCTAGTAGTCACTGTCTCTCATCCTACTACAGTGTCTTTGTGGTTCGACTAGCAATC  
ATGGTGATGCTAGCCATCTTGATAGGGTTGCTCACTATACTGACATGGCATTTCACCAAGA  
TTTATACAGCAAATCACTTCGCAGCTTGGCATATGGTTTGCATTGAACTTCTGCAACG  
CCCCGTTTTGAGGATGTGGAATATTTTAACTCTACTTCTGAAATCACTACAGCTCAGGTCA  
AACTGTCTCAGTATGTGATCAGACGTCACAGAACCCCTGCGACTCAAGCAGAGCAAGTTG  
AGCTGTATGAAGCATGAGGGCTGTAACATGGGCGTTATTTGCTAGTGCAGAAAAGCTTAA  
ACTCTATAAATCAATTATAAGAATGGATTTGTTCAAGCGTTCCACAGAGATCTTAAGGA  
CAACAACACATTTTACATCTATTCTGATCTTTCAAATTACTCCATGGGTGCTAGCAACTCTA  
ATGAGGTCAATTCCATTTCAAAGCACCGAGCTTGGGATGATAAAGGCCTTCATGGTAACTA  
TTCTTCAATCTGGTACCGAGAACCCTTGACCCTGTGAGTGGTGAAAAGATTGAAAAGCT  
ATGAAAATTGCACCTGAAGACTTGATCAACATCGCTGGACTTTCCCAAGTGCCTGACGGTG  
TAGCTTCGTGGCATGTCGCAGTGAGCAAGTTCACAGATTCACCATTGCTTTCAGCAGCATT  
GCCAGTTTGGGACTCTTCTAATAAGACTATTATGGCGGTTGTGGGGGTCACAACTGCACTT  
TATAGTGTAGGACAGCTAATGAGAGAGCTAGTTGAGATGCACAGTGGCCATATGTATTTGA  
CATCTCAAGAGGGTTACTTACTTGAACCTCCACAAGTGCACCTCTACTGGAACTTCAAC  
AAAGCCTCCTAAGCTTAAGATGGCTGTTGACTGTGAAGACAACGTAATTGCACTGGGAGC  
TGAGTGGTTACAGAGAACTTATGGGAACAATTTTCTCCAAGTCATGAGATTCATGTAGAG  
AATGTCAAGCTAGGTCAACAGAGATATTACATTGACTCATTCTTCTAAATTTAAGAGACT  
TCCTTGGTAGGTGTGATCATCATACCAAGAAAGTATATCATGGGGCAGGTAGATGAAAG  
AGCCTACAAAACGTTGGTTATTCTGATATCTGCATCATTATGTATTTTAGTCATTGGATGTG  
TTTGCATTTTGTATTTGACAAATGGAGTATCAAAGGAAATGAATCTAAGAGCAGAACTGAT  
AAATCAACTGGAAGCAAGAAGAAAAGCAGAGGCATCAAGCAACTATAAAAGTCAATTCCT  
TGCAACATGAGTCATGAACTGAGGACACCTATGGCAGCAGTAATTGGGTTGCTTGACATT

CTCATATCAGATGACTGTCTCACAAATGAACAATATTCAACAGTTACTCAAATAAGAAAAT  
GTTCAACTGCTCTGCTCCGTCTTCTTAATAACATCTTGGATCTGAGTAAGGTGGAATCTGG  
AAAAGTGGTCTAGAAAGATGCAGAAATTTGACTTAGGAAGGGAAGTTGAAGGGCTTGTAGA  
TATGTTTTCTGTTTCAGTGCATGAACCACAATGTGGAGACTGTTTTAGACCTGTCTGATGATA  
TGCCAAAGGTAGTCCGTGGAGATTCTGCGAGAGTGGTTCAAATATTTGCAAATCTGATCAA  
CAATTCAATCAAGTTTACTCCATCGGGTCATATTATTCTGCGAGGATGGTGTGAAAACCAA  
AATTCTTACGTTGGTAGTCCCTTTGACCAGAAGAAATCTCGGAGTTTACAAAAGTGCATAG  
AGAGGCCAAATGCAAACCATGCAAAGAGAACTTCTGTGAAAGATAACAAAGTGATACTTT  
GGTTTGAAGTTGACGACACAGGCTGTGGTATTGACCCAAGCAAATGGGATTCTGTGTTTGA  
AAGCTTTGAGCAGGCTGATCCATCAACTACACGACTGCATGGAGGCACTGGTCTTGGTCTT  
TGCATTGTGAGAACTTGGTTAACAAGATGGGTGGAGACATCAGGGTTGTCAAAAAGGAG  
GGCTCAGGAACACTAATGCGATTATGCTTCTCAGTGCGCCAATGGATGTCACAGAA  
CAACAGTGTGCAGTAGATTTGACAGACAATGGCTTAGTGGTACTGCTTGTCTGCATGGCA  
ACATGGGTCGATTAATTACATCCAAGTGGCTACAGAAAAACGGGGTGTGCACAATGGAAG  
CATCTGACTGGAACGGACTAACTCAAATTTTGGGGAAGTCTTTCATGCAGGAAGTTGAGT  
TCATAAATACTGACTTTGAGGCACACTATCCAGCAAAGAGGAATTGAAGTCTAAACTACTC  
AACATAAGAGATATGAGGAACCCGGGTTTTGTCATTGTTGTTGACATTGGACTACTTGACT  
TGAGTACAGATATATGGAAGGAACAGTTTAACTTCCACAGGTAAGTTTGGTAGAGCAAA  
GTTTGTATGGATGTTAAACCATGACACTTCCAATACCATAAAAATGGAGCTCCGTAGGAAA  
GGGCATATACTTATGGTTAACAACCCCTTTACAAAGCAAAAATGATTCATATCTTGGAAAG  
CTGTCATAAATGAGAGAAATCTTGAAGTACAAAAGAAAAACATGATAGCTCCAAGGACCA  
CAATGAAAGAGGGTGATTTGCATGAGTTTCTTGAAGATTGATTCCACTCATTTTGTGGTGCT  
AGCTCTGATGATTCTGACATATCAGAAATAAGTGGTCTAATCCCGTTAGTGCTAATGGAG  
ATAAACCAGTTGAGAAGCTAGAAAACCTCATCCATCATCACCACACCATATGAATAACTG  
CCTAAAGAATCTTCTAGTCCAGCTCCAGTTCTGCCACTGAAGACAACCAACCTAAATCAC  
TATCCACCAAAGAATCATCATCCATTTCAACAGAAGATCAGGATGAAGATTCTGAATGTGG  
GGACACAAATAGGGTCACCAGCTCAAGGCCTAAAGATTTTGTGCTGCAGAAGATACACCAG  
TACTTCAAAGGGTTGCTACCATAATGCTTGA AAAAATGGGAGCAGATGTTGTTGCTGTAGG  
TGATGGACAACAGGCAGTAGATGCTCTCAATTGCATGTTCACTGCTGAAGACTGTAGAAG  
AGAATCACTCCAGAAGGAAAGAAACACAAGATCTCAAACAGAGATTTGACTTCCCGTCC  
ATATGACTTGATCCTAATGGATTGTCAGATGCCAAAGATGGATGGCTATGAGGCAACAAA  
AGCAATCAGGAAATCAGAAGTGGGAACAAGCAGGCACATTCCCATGTTGCTCTTACAGC  
ACATGCAATGTCATGTGATGAAGCAAATGCCTGGAGGTGGGCATGGATGCTTACTTAAC  
AAAGCCAATTGACTTCAAATGATGGTGTCCACCATTCTTCACTCACTAAAAGAACATCTT  
GA

>GmHK09 (Glyma02g05220.1)

ATGGGTATCAAGTGCATACACGTTTTTGTATAGATTATATAGTTTTTCACTTGTTCTGAAGAA  
AAGCACCATGCCAAGTGGCAGAAGAATTTCCACAGGGATGTGGAAAAGGAAGAATTTCA  
GTATGCTAGCACTCAATGTCTCTCATCTTACTACAGTGTCTTTGTGGTTCGTCTAGCAATCA  
TGCCCATGCTAGCAATCTTGATTGGTCTTCTCACTTTTCTGACATGGCATTTCACAAAGATT  
TATACAACAAAGTCTCTTAATAGCTTGGCTTATGATCTGCGTTACGAAGTTCTGCAACGCC  
CCATCTTGAGGATGTGGAACATTTTGAATTCTACTGCTGAAATTACAAGTCTCAGGTTAA  
GCTGTCTCAGTATGTGATCAGAAAACACACCAACTTTGCCACTCAAGCAGACCAAGTTGA  
GATGTATGAGGCGATGAGGGCTGTAACGTGGGCGCTGTTTGTGTTAAAAGGCTCTCAA  
TTCAATAACTGTCAAATACAAGAATGGATTTGTCCAAGCATTCCATAGAGACCTGAAGGAT  
AATAATACCTTTTACATTTATTCTGATCTTGCAAATTAATCCATGGCTGCCAGTGGCTACAA  
TGAGATCAATTCACGTTTCGTGCGTGAAGCTTGAACGATAAAGACATTCATGGTCACAA  
GCCTGCAATTTGGTATCGCGAACCCTTATCCAATCAGTGGTGAGAAGATTGGAAAAGT  
AAGGCCAATTGCACCAGAAGACTCGATCAATATAGCCGGCCTCTCCAAGTACCTGACGG  
TGTAGCTTCGTGGCAGTTGCTGTTAGCAAGTTTACAGATTGCGCGTTGCTTTCTGCAGCA  
TTGCCAGTTTGGGATTCTTCTAATAAAAAGCATTGAGGCAGTTGTGGGTGTCACAAGTGCAC  
TTTACAGTGTGGGGCAGCTCATGAAAGAGCTAGTTGAGAAGCATAGTGGTACATGTATTT  
GACCTCCAAGAGGGTTACTTACTTGAAGTCTCCACAAATGCTCCTCTACTATCAAATCTA  
CCAAGCCTCCTAAGCTTAAGATGGCTGTTGAGTGTCAAATGAAGTAATAAGAGAGGGAG  
CTCAGTGGCTGCAGAAAACCTATGGGAATAATTTCCCTCAAAGTCATGAGCTTCATGTAGA  
GAATGTCAGGCTAGGCCGCAACAATATTACATTGACTCATTCTTCTGAACTTAAAGAGA

CTTCCTCTGGTGGGTGTAATCATCATACCTAGAAAGCATATTATGGGGCAGGCAGATGAAA  
GAGCCTTCAAACATTGGTTATTCTGATATCTGCATCATTGTGTATTATTGTCATTGGATGT  
GTTTGCATTTTGATACTGACTAATGGAGTATCAAAGGAAATGAACTTAGAGCAGAAGTGA  
TCAGTCACCTGGAAGCAAGAAGGAAGGCAGAGGCATCAAGCAACTATAAAAGTCAATTC  
TTGCAAATATGAGTCATGAATTGAGGACACCAATGGCAGCAGTAATCGGGTACTTGACAT  
TCTTATATCTGATGACCGTCTCACAAATGAGCAATGTGCAACAGTACTCAAATAAGAAAA  
TGCTCAACTGCCCTGCTTCGTCTACTTAATAACATCTTAGATCTGAGCAAGGTGGAATCTG  
GAAACTGGTCTTAGAAGATGCAGAATTTGACTTGGGGCGGGAACCTGAAGGGCTTGATG  
ATATGTTTTCTGTGCAGTGCATTAACCACAATGTAGAGACTGTTTTAGACCTGTCTGATGAT  
ATGCCAAAGCTAGTTCGGGGTGATTCTGCTAGGGTAGTTCAAATTTTTGCAAATTTGATCA  
ACAACTCAATTAAGTTTACTCTATCTGGTCATATTGTTCTGAGAGGATGGTGTGAAAACCC  
AAATTCCTGCAGTGACAATACAAATTTCTCTAGAACAAAAGAAATTACGGTGTCTCGCAG  
AAGACCAGAGCAAAGCAACATGAAAATCATGCAAAAAGAACTTCTAATAGAGATAACAAA  
ATGATACTTTGGTTTGAAGTTGATGACACAGGCTGTGGTATTGACCCAAGTAAATGGGAAT  
CTGTGTTTTGAAAGCTTTGAGCAAGCTGATCCATCAACTACTAGACTGCATGGAGCCTGG  
TCTTGGTCTTTGCATCGTCCGAACCTTGGTTAATAAGATGGGTGGAGAAATCAAGTTGTC  
AAAAAGGAGGGCTCAGGAACACTGATGAGATTATGCTTGCCTCAGTGCACCTGTGGAT  
GCCACAGAACAACATTGTCAAGTAGATTTTGTCTAACAAAGGGCTTGGTGGTCTTCTTGAC  
TACACGGCAACATGGGTGCGATCAGCTACATCTAAGTGGTTACAGAAAAACGGGGTGGTCA  
CTATGGAAGCAGCCGAATGGAATGGACTAACACAATTTCTTAGGGTACTCTTTCATGCAAG  
AAGTTCAGCTCATAATAATGGCTTTGATGCAAATTATTCAGTGCATGACAATTTAAAGTCAA  
GACTACTGAGCATACAGGAATTGAGGAACCCAGTTTTTGTCTATTGCTGTTGACATTGGACT  
ACTAGACTTAAGCACAGATATATGGAAGGAACAGCTCAATTTCTTCAAAATACTTTGGG  
AGAGCAAATTCGTGTGGATACTAAACCATGACTCCTCCAATACCATGAAGATGGACCTTT  
GCAGGAAAGGACATACACTGACAGTGAATAAACCCCTTTACAAAACAAAATGATTCATA  
TTTTGGAATCCATCATAAAGGACAGAAATGAAGAGCTACAAAAGAAAAATATGACTACTCT  
AAGAGCTACAGTGAAAGAGGGCAATTTGCATGAGAGTCTTGAGATTGATTATACTCAATGT  
GATGTTGCAAGCTCAGATGTTCTGACATATCCGAAACGGGTGGTTCTAATCCTGTTAGTG  
CCAGAGGAGATAAACAAAGAGAGAAGGTAGTGAGATCCGATCCATCATCACAAACACCAG  
ATAAATAACTTAGTTGGATTAACAATGAATGCATGGAAGATGATAATCATAGGAAGGAAG  
AGTTATGTCAGAGCAGCCTTAACCTAACGATGTCACTGCTAACGCCTCACCAAAATCATC  
CTCCACTAAACAAGCATCCTTTGCAACAGGAGCTCGAGATGGAGATTCTGAATATGGTGA  
AACACGTAAGGCCAGTAGCTCAAGTAGAGCAGTGAGTGGAAGAAATCTCTTGAAGGTTT  
GAGGATATTGCTTGCAGAAGATACACCAGTAATCAAAGGGTTGCAACCATAATGCTCGA  
AAAAATGGGAGCCATTGTTGTAGCTGTAGGTGATGGACGACAGGCTGTGGATGCTCTGAA  
TGGCATGTCTGGTGTGAAGATTGTAGAAGGGAGACTCTTCTTAAGGAAAGAAACACAAG  
ATCATCTCAAACCTGAGATTCTCAGTTGCCCTCCATATGATTTGATCCTAATGGATTGTCAGA  
TGCCAAAGATGGATGGCTATGAGGCAACAAAAGCAATCCGGAATCAGAAGAGGGAAC  
GGCTTGACATGTTCCAATTGTTGCTCTTACAGCTCATGCAATGTGATGATGAAGGCAAT  
GCCTAGAGGTGGGCATGGATGCCCTATTTAACAAAGCCAATTGACTTCAAACCTGATGGAGT  
CCACCATTCTTCACTCACGAGAGGGACATCCTAACTTTTTATCTGTGATGAAGGCTAGCA  
AAGGGTTGTCTTAGACCGACTAGAAATGTATAGAATTTTACCAATATTAACATCAAGAAA  
CACGGCTTAACATACAAATTCAGAAACGTAATCCAGTTTTCTGAATTAACCTATTTTTAC  
AGCAAATTAAGCTTGTACCCCTTGTCTTCTCAACAATACAGAAGGCCAAATTCGGT  
GTGAATGTGACTACACTTTGTACAAGAAACAATTTTTGTATGTATTACCTAATTTATTACC  
TATTTGT

>GmHK10 (Glyma02g47610.1)

ATGTGTCCGGAGAATCAGGAGTTACAAAAGGAGCATACATGTGTTGTAGACACTGTAGAA  
CCTATAGAACAATGCCCAATTCTTGATGATTATGTCCAGACAAGGCTCGAATTATCATTCC  
CATTGAAAAATTATGTATCATTGGCCTTGCCTCTGCACTTTCAACTGATTTGACTCTGCTT  
CTAAGCTTATGCAATAACTATGAAGGCGTGCCTCCTTGCATGGATGCTGGTGGTTCATTG  
GAATTATAATGTCCTACTTCTGTTTACTATGGAGGAGTCAAAGCAGAAGCTAGTTCAGGG  
GCATCCAGGTGCACAACAAAAGCAGTTGAAACATTTTCCAAGGGGTCTTCAAGGGGTAC  
TGGGAGGTGGAGGAAAAAGTTACTAGTTATATTTGTGTCACCTTGAATTATCGGGTCTTT  
TGGTTATTTTGGCACCTGAATACGGGCATTATGCAGAGAAGAGAAGAAACACTAGCAAAT  
ATGTGTGATGAGAGAGCCGTATGCTGCAAGATCAGTTAATGTGAGCATGAACCATGTTT

ATGCTCTGGCTATCCTTGTATCTACCTTTACCATGGTAAACATCCTTCTGCAATTGACCAG  
AAAATTTTTGGAGAATATACAGAGAGTACAGCATTGAAAGACCACTTACTAGTGGTGTG  
CTTATGCTTTGAAAGTTCTCCACTCTGATAGGATGCATTTTGAGAAGCAGCATGGGTGGAC  
AATTAAGAAAATGGAACTGAGAATGAGGCATTAGTCCAAGATTGTATTCCTGAAAAATTG  
GATCCAGCACCCATTCAAGATGAATATGCACCAGTGATATTTGCTCAAGAAACAGTTTCCC  
ATATTGTATCTATTGACATGATGTCAGGGAAGGAGGACCATGAGAATATTTTGAGAGCAAG  
GGCATCTGGAAGGGGGTTCTGACATCCCCTTTAACTACTAAAGTCCAATCACCTGGGT  
GTTGTACTTACATTTGCTGTCTATAACACTAATCTTCCTTTAGATGCTACACCGGAGCAGCG  
TACCGAAGCTACTGTGGGGTATCTGGGTGCATCTTATGATGTTCCATCACTGGTGGACAAG  
CTTCTGCACCAACTTGCCAGTAAACAAACCATTGTTGTAAATGTTTATGACACAACTAATG  
CATCTGCACCAATCACAATGTATGGTACAGATGTTGCTGACACTGGCCTACTACACATAAG  
CAGCCTAGATTTTGGGGATCCGCTACGAAAACATGAGATGCACTGCAGGTTCAAGCAGAG  
GCCTCCATTACCTTGGACAGCAATCAATGCATCAGTGGGGGTGTTTGTATTACTTTGCTTC  
TGGGTCAATTTTTATGCAGCAATTAATAGAATAGCAAAGTTGAGGCTGACTATCGTCA  
AATGAGAGAGCTGAAAGTTCGTGCTGAAGCTGCAGATGTGGCAAATCTCAGTTTCTTGC  
AACAGTTTCACATGAGATCAGGACTCCAATGAATGGTGTGTTTAGGTATGCTGCAAATGTTG  
ATGGATACTGAGCTTGATGAAAACCAGATGGACTGTGCCCAAACCGCCACAAGAGTGGT  
AAAGATCTTATCTCAGTCATAAGTGAGTTCGTGATCAGGCTAAGATTGAGGCAGGAAAG  
CTTGAACCTGAAGCTGTAGCCTTTGATCCACGAGCTATTCTTGATGAAGTTTTATCACTTTT  
CTCTGAAAAATCTAATGAAAAAGGAATAGAGCTGGCTGTTTATGCATCCAATCAAGTACCC  
AAAGTTGTCATTGGCGATCCTAAACGGTTCGGCAAATAATTACTAATCTTGTGGCAATT  
CACTTAAGTTTACTCATGATAAAGGGCATGATTTGTCTCTGTTTCTGCGAGTGAAGTG  
AAAAACCACTTCAATTTATGGACGCAGTGCTGAGAGAAGGCTTAACTTAAGCCAGGAC  
ATAACAAACAGAACATATGATACGTTAAGCGGGTTTCTGTATGCAACAGATGGAAAAGTT  
GGGCCAATTTTACGAAGTTAAGTGGCACAAATGAGCCTGAAATTATTCAACTTCTAGTAAT  
AGTTGAGGACACAGGTATAGGAATTCCTACAGATGCACAAAGCCGCATATTCACACCTTTT  
ATGCAGGCTGACAGTTCACCTCCCGAACATATGGTGGAACTGGAATAGGACTGAGCATT  
AGTAGATGTCTAGTTGATCTCATGGGAGGAGAAATTGGATTTGTAAGTGAGCCTGGAATTG  
GAAGTACTTTTTCTTTACTGGAACCTTTCAGAAAAGGAGAAAGCACGTCTCTGGATGCAAT  
GCGGCAGAATAATCATTTTTGGTTCAGAGTTCAGAAATTGAGAACATTAGTGGTAGATAGA  
AGAAAAATCCGAGCTGAGGTCACAAAATATCATCTGCAGAGATTGGGAATGTCCGTGGAT  
GTAECTTACAGTCTGAATTCTGCATGCTCTTGTCTATCTAATGTGTGTAACATGAGTATGTT  
GGCCATGATTCTTATTGACAAGGATGCTTGGGATAAAGAATATCATATCTTATACACAATC  
AAGAAACGTAGACAGAATGGCATCAAAGGGGATCCATTGAATTTACCAAAGATTTTTCTCC  
TAGCTACCCACCTTAGCTCCAATGAACAGGATGAGCTCAAGTCAGTTGGTGTATAGATGA  
TATATTAATGAAGCCTCTATGGTTTAGTTCTTTGATTCAAGTGTACAGAGAATCCCTGGCA  
CTGAAAACAAGCGAGTAAATAGGAAAAAAGTATCCAAACTCGGGAATTTATTAATTGACA  
AACAAATTTTGGTGGTTGATGATAATGCAGTGAACAGAAGAGTTGCAAAGGTGTTCTACA  
GAAATATGGGATAAAGTGACTGCTGTGAGAGTGGCAGGGCTGCTCAAAGATGCTTGA  
GCTGCCGCAATTTTTGATGCTTGTGTTTCTGAGATCTCCAATGCCAGAAATGGATGGTTTTG  
AAGCGACGAGGAAAATCCGTTGTCTGGAGAGTGAGGTAATGAGAAAATTGCATGTGGGC  
AAGCATCTGCAGAGATGTTTGGTAACATCTCTTATTGGCACATTCCGATACTAGCAATGAC  
AGCAGATTCAACTCAGTCTTCCAATGAAGAGTGCATAAAGTGTGGAATGAATGACTATGTG  
TCAAAGCCGTTTGAAGAAGAGCAGCTCTACATGGCAATGGCACGTTTCTTCAAGTCAGATT  
CATAGTGTGGAAGTTTGAATCTTTGATTATTAGTGCAGACACCCTGCTCACAAGTGTGGA  
CTGACCTCCAGTGTGATGTGTAGTATGATATCAATTATCATCGAATGCCATTTGTTGGTTTT  
CCATTAAGAGCTAGCGGATGGATTAATTTTGGCTAAATTATTTCCAGATATTGTAATGGT  
TGGACATGCCCCAGCTGATGTGTTCTAATTGAGACTGCTTGCCAGCATCAAAGCTATCAA  
TTCAGCATCATGGATCTCACCTATGGTCTTGTGTTTGTGATAGTAAGTACCATGTTTACATCC  
CAGGATTTTCAATTTTTTTTTGTTCTAGGCCAGAGACCATGAGTGTCTTCCAACCCATTG  
AGTCAAAGACTAATCCCGCTCACGATACATGACTGTCGCTGACTTATGGGAATTTTGCATA  
CGGATATTGATTTTGAAGTCAAGATATTATCACTTATTGCAGGACAGGAGGAGGTC AACAG  
AAGGCATAATTTTATTTTTGTGTACATAACCCGTTTTTGTTCCTGCTTCCCGTCTGCTTATTAT  
TTTTGTAAATATTTATATTTGGAGCTAGTAGGATAAGAGAAAAATGTTATAGTGTGACAT  
CATTATTTCAATTTTGGGGGCCAAGATGGAAGGAATGACAGATCTTTGAACCCCTATAA  
TTTTGTAAGTAGCATGTAAAGCAAATATTACATGATACCAGTAGAATGACATCATA



>GmHK11 (Glyma14g01040.1)

TCTAATTTAATTAAGGATGCTGGTGGGTCCTCATTGGAATTACAATGTCCTACTTCTGTTT  
ACTATGGAGGAATCAAAGCAGAAGCTAGTTCAGGGGCATCCAGCTGCACAACAAAAGT  
GTTTGAAACATTTTCCAAGGGGTCTTCAAGGGGTGCTGGGAGGTGGAGGAAAAAGTTAT  
TAGTTATATTTGTGTCACCTTGAATAATCGGGTCCTTTTGGTTATTTTGGCACCTGAATACG  
GGAATTATGCGGAGAAGAGAAGAACTCTAGCAAATATGTGTGATGAGAGAGCCCGTATG  
CTGCAAGATCAGTTTAAATGTGAGCATGAACCATGTTTCATGCTCTGGCTATCCTTGTATCTAC  
CTTTCACCATGGTAAACATCCTTCTGCAATTGACCAGAAAATTTTGGAGAATATACAGAG  
AGTACAGCATTGAAAGACCACTTACTAGTGGTGTGCTTATGCTTTGAAAGTTCTCCACTC  
TGATAGGATGCATTTTGAAGAAGCAGCATGGGTGGACAATTAAGAAAATGGAACTGAGAA  
TGAGGCATTAGTACAAGATTGTATTCCAGAAAATTTGGATCCAGCACCCATTCAAGATGAA  
TATGCACCAGTGATATTTGCTCAAGAAACAGTTTCCCATATTGTATCTATTGACATGATGTC  
AGGGAAGGAGGACCGTGAGAATATTTGAGAGCAAGGGCGTCTGGAAAGGGGGTTCTGA  
CATCCCCTTTAACTACTAAAGTCCAATCATCTGGGTGTTGTACTTACATTTGCTGTCTAT  
AACATAATCTTCTTTAGATGCTACACTAGAGCAGCGTATTGAAGCTACTGTAGGGTATC  
TGGGTGCGTCTTATGATGTTCCATCACTGGTGGACAAGCTTCTACACCAACTTGCCAGTAA  
ACAAACCATTGTTGTAATGTTTATGACACAATAATGCATCTGCACCAATCACAATGTAT  
GGTACTGATGTTGCTGACACTGGCCTACTATACATAAGCAGCCTAGATTTTGGGGATCCGC  
TACGAAAACATGAGATGCACTGCAGCTTCAAGCAGAGGCCTCCATTACCTTGGACAGCAA  
TCAATGCATCAGTGGGGGTGTTTGTATTACTTTGCTTCTGGGTCATATTTTTTATGCAGCA  
ATAAATAGAATAGCAAAGTTGAGGATGACTATCGTCAAATGAGAGAGCTGAAAGTTCGT  
GCTGAAGCTGCAGATGTGGCAAATCTCAGTTTCTTGCACAGTTTACACGAGATCAGG  
ACTCCAATGAACGGTGTGTTTAGGTATGCTGCAAATGTTGATGGATACTGAGCTTGATGAAA  
ACCAGATGGACTGTGCCAAACCGCTCACAAGAGTGGTAAAGATCTTATCTCAGTCATAA  
GCGAGGTTCTTGATCAAGCTAAGATTGAGGCTGGAAAGCTTGAAGCTGAAGCTGTAGCCTT  
TGATCCTCGAGCTATTCTGGATGAAATTTTATCACTTTTCTCTGAAAAATCTAATGAAAAAG  
GAATAGAGCTGGCTGTTTATGCATCCAATCAAGTACCCAAAGTTGTCATTGGCGATCCTAA  
ACGGTTCGACAAATAATTAATACTTGTCTGGCAATTAAGTGAAGAACCCACTTCATATTATGGAT  
GCAGTGCTGAGAGAAGGCTTAACTTGAACCAGGACATATCAAACAGAACATATGATACG  
TTAAGTGGGTTTCTGTATGCAACAGATGGAAAAGTTGGGCAAATTTAAGCAGTTAAGTG  
GCATAAATGAGCCTGAAATTATTCAACTTCTAGTAATAGTTGAGGACACAGGTATAGGAAT  
TCCTACAGATGCACAAAGCCGCATATTCACACCTTTTATGCAGGCTGACAGTTCCACCTCC  
CGAACATATGGTGGAACTGGAATAGGACTGAGTATTAGCAAATGTCTAGTTGACCTCATG  
GGAGGAGAAATTGGATTTGTAAGTGAGCCTGGAATTGGAAGCACTTTTTCTTTACCGGAA  
CCTTCAGAAAAGGAGAAAGCACGTCTCTGGATGCAATGCAGCAGAATAATCATTTTGGTTC  
AGAGTTCCAAGGATTGAGAACATTAGTGGTAGATAGCAGAAAAATCCGAGCTGAGGTAC  
AAGATATCATCTGCAGAGATTGGGAATGTCCGTGGATGTAAGTACTTACAGTGAATTTGCA  
TGCTCTTGTGTTTCTAATGTGTGTAACAAGCATATGTCTGACCCAATTGGCCATTTCTTAT  
AGACAAGGATGCTTGGGATAAAGAATGTCAATCTTATACACAATCAAGAAACGTAGACA  
GAATGGCATCAAAGGGGATCCAATGAATTTACCAAAGATTTTTTCTCCTGGCCACCCACCTT  
AGCTCCAATGAACAGGATGGGCTCAAGTCAGTTGGTATAAATAGATGATATACTGATGAAG  
CCTCTTTGGCTTAGTTCTTTGATTCAAGTGTACAGAGTATCCCTTGGCACTGAAAACAAGA  
GAGTAAATAGGAAAAAAGTGTCCAACTCGGGAATTTATTAATTGACAAACAAATTTTGGT  
TGTTGATGATAATGCAGTCAACAGAAGAGTTGCAAAGGTGTTCTACAGAAATATGGGGC  
TAAAGTTACTGCTGTGGAGAGTGGCAGGGCTGCTCTGAAGATGCTTAACTGCCACATAA  
TTTTGATGCTTGTTCATGGATCTCCAAATGCCAGAAATGGATGGTTTTGAAGCAACGAGG  
CAAATCCGTTGTCTCGAGAGTGAGGTAATGAGAAAATTGCGTGTGGGCAAGCATCTGCA  
GAGATGTTTGGTAGCATCTCTTATTGGCACATTCCAATACTGGCAATGACAGCAGATTCAA  
CTCAGTCTTCCAATGAAGAGTGCATAAAGTGTGGAATGGATGACTATGTGTCAAAGCCATT  
TGAAGAAGAGAAGCTCTACATGGCAATGGCGGTTTTCTTCAAGTCAGATACATAG

>GmHK12 (Glyma08g11060.1)

ACAGTGTGACAGCTAGCTTCTAAGAAATAAAAGAAATCTTTCTGGAACACACTCACGTGCTT  
GTGTTGTTCTTGTGTTGATTCTAGGGCCATGAAGTGCAAGCTAGAAGACCTTCTTTGCTGAGT  
GATAGTGAAGATCGAATCTTTTTGTAGGTTTAGTTTTGGCCCTTCTTTTTGTTCTGCGTCTT  
GGTTGGTAGCTGCTGCTAGCTAACAAGATAATAAGGAGTATCAATTTCTGTTTTAGAATTA

GAAACCCAGAATCTTGTGATTCTTTTATTCTTTAAAGGGTGTGTGTGTGTTAGCCTTGTGGG  
GATTCTGTGGATTTGACAGCGGTTCTTTCTTCTCTCTCTAACACAAGCCTATACCTGGAA  
TCAGCTAGAGTTGACACCCACAACTGTTTGAAGTGTGTCTTTTTAACTTGTGTTGGTTACT  
GTTGTGGATGAGCTTGCTCCATGTAGTTGGGTTTGGTCTTAAAGTGGGGCATCTACTTTTG  
GTGCTATGTTGCTGGGTTGTGTCTGTGGTTTATCTTAACTGGTTTCTCAGCAGTGGAATTAT  
TATGGACACCAAGATGGGTGGTGGAGGTGGTGGTGGTAGCAAGATGTGGCCACAAAAAT  
GGTGGGAGAAGATCTCAGGGCAGGGTTGCAAAATCCACCAACAGTACTACCAGTATATTG  
GCTCCAAGAAAGTTAAGAGAGCGTTGTGGAGGAAGCTTTTGCTGACATGGGTAGTGGGTT  
GGTTCATAGTATCTTTGCGGATCTTCTGCTACATGAGCTCGCAAGGTAAGTACTGAGAAGAGGAA  
AGAACTCTTGCAAGCATGTGTGATGAAAGGGCTAGGATGCTGCAGGATCAGTTTAAATGT  
CAGTATGAACCATATCCAAGCCATGTCCATTCTAATCTCCACTTTCCACCATGCTAAGAGC  
CCCTCAGCCATCGATCAGAAAACCTTTGCAAGTACACAGAAAGAACAGCTTTTGAGAGA  
CCTCTTACAAGTGGTGTTCGATGCTGTAAGGGTGTCCATTCTGAAAGGGAACAATTTG  
AAAAGCAGCAAGGTTGGACTATCAAGAGGATGGATACTCTAGAGCAGAACCCGGTTCATA  
AGGACGATTATGCCCCAGAGGCACTGGAGCCATCCCCTGTTCCAGGAAGAATATGCTCCTG  
TCATCTTTGCACAGGATACAATTGCACACGTGATTTCTGTTAATGTGCTTTCTGGAAAGGAA  
GACCGTGAATAATGTGCTGCGTGAAGAGAATCAGGCAAAGGGGTTTTAACTGCGCCCTTT  
AGGCTGCTCAAAACAATCGACTAGGGGTTATCCTGACCTTTGCTGTTTACAAGAGAGATC  
TCCATCAAAACAACCCCAAATGAAAGGATTCAAGCAACTGACGGGTATCTTGGGGGAG  
TCTTTGATGTTGAGTCATTAGTGGAGAAATTACTTCAGCAACTTGCTAGCAAGCAAATGT  
AATTGTTTATGATATGATACTACAAATCGTACTCATCCAATTGCCATGTATGGCTCAAATG  
AATCAGGGGATTTTTCTATCACGTCAGCACTCTTAACTTTGGAGACCCTTTTAGGAAGCAT  
GAGATGCACTGCAGGTTCAAGCAGAAGCCACCATGGCCATGGGTGGCAATAACTACTTCT  
ATTGGTATCCTTGTTATTGCACTCCTTGTGGATATATTTCCATGCCACTGTGAATCGAATT  
GCCAAAGTAGAAGATGATTACCGTGAGATGATGGAACCTTAAAAACGAGCTGAGGCGGCT  
GATGTTGCAAAATCCAGTTTCTTGCTACTGTTTCCCATGAGATCAGAACACCAATGAATG  
GTGTTTTGGGGATGTTGCATATGCTTATGGACACAGATCTAGATGTAACCCAACAGGAATA  
TGTCAGGACAGCACAGGAAAGTGGAAAAGCTCTGGTGTCACTTATAAATGAGGTTTTGGA  
TCAGGCTAAGATTGAGTTTGGTAAGCTAGAGCTTGGAGCTGTGCTCTTCGACATACGGGC  
AATTTGGATGATGTATTGTCTCTATTTTCTGAGAAGTCTCAAGGAAAAAGAGTAGAGTTG  
GCAGTTTATGTGTCAGATCATGTTCCCTGAATTAATAGGTGATCCAGGAAGATTTCCGAC  
AAATAATTACCAATCTCATGGGTAACCAATTAAGTTCACGGACAAAGGACATATTTTTGTC  
ACAATCCATCTTGTTGAGGAGGTTGTCGTTCAATAGAGGTTGACAAAGAATCCAACCTCAG  
AAAATACCTTGAGTGGTTCGCCCGTTGCTGATAGTCGCCGGAGCTGGGAAGGATTCAAGG  
CTTTCAGTCAAGAGGGACCTCTTGGTTCCTTCTCATCCCCCTCCAATGATCTTGTCAATTTG  
ATTGTATCTGTTGAAGATACAGGTGAAGTATTCTTGAATCTCAGCCACTCATCTTCCAC  
CCCATTATGCAGGTAGGTTTCCATCTCCCGAAAGCATGGAGGAACAGGCATTGGCCT  
AAGCATTAGCAAATGTTTGGTTGGCCTCATGAATGGGGAATTTGGATTTGAGCATAACC  
AAGATTGGGTTCCACATTCACTTTTACTGCTGTATTACCAATGGACACCGTGTCAAGT  
AGTGTAATAATCAGCAAATCAACAACCTCACTCAGTCTGCATCTTCAGAATTTGAGGGGAT  
GACTGCATTAATTATTGACCCAAGATCTGTTAGAGCAGAAGTGTCTGGATATCACATCCAA  
CGGCTTGGCATTATGTTGAAATGGTTTCAAGATTTAAAACAAGGTTTGTCAACCATAAGCA  
ATGGGAATGTAGTTGTTAATATGGTCTGATTGAGCAGGAGGTTTGGGATAGAGATTTAGG  
CTTGTATCTCACTTTGTCAATAACACGAGGAGAATTGATCATGGGGTTCTCCAAAGCTG  
TTCATTCTTGTTAATTCTAGTAGTTCTTTTAAAGCTAGCGTAACTTTGGGTGTTTATAATCCT  
ACTGTGATCACCAAACCTCTGAGAGCAAGTATGCTTGTGCTCACTACAACGAGCCATG  
GGTGTCCAAAACAAGGGAGCTCCTCATAGAGAGCTCCAAAGTTTGTCTCTTCGCCATCTTC  
TTCGTGGCAGGAAAATTCTAATTGTAGACGACAATGGTGTGAACCGTGCAGTAGCAGCTG  
GTGCATTGAAAAAGTATGGAGCAGATGTGGTTTGTGTTAGCAGTGGAAAAGATGCCATCT  
CTTCTTGAAGCCACCCCATCAGTTTGTGCTGTTTCTGATGATATTCAAATGCCAGAAAT  
GGATGGATTTGAAGCTACAAAGCGAATTAGGGAGATGGAAGATAGTGTGAACAGAGAAGT  
ATCTATGGATGACTTTGAGAATATTACAACTGGCATGTACCCATTTTAGCCATGACCGCA  
GATGTGATACAGGCTACACACGAGGAATGCCTAAGGTGTGGCATGGATGGATATGTTTCA  
AAACCATTTGAAGCTGAACAGCTGTATAGAGAAGTCTCACGGTTTTTCCAGTCATCTTGAA  
AAGAAAATACGGTGCCGAGTTAAACCAGAATATTTGATAATGGAAGCGTAGCTGTCCGTA  
ATCCAGGACACTCCGAAGTGGGCAAATAGGTTCCGAAGTCTCCTGAGAGTAAGTTCCTA

TTAACAGCCAGTGCATGTTTTAGTATTTAACACCTCAAAGCTTGGTGGTTGTTCACTAGA  
GACAGAAGAATGCTATCTATCTCATCTGAAAGATAAAAAGAAAATGGAACAAAGGGGATA  
ATATTGTAGAAGTTCAGAAATGGTTCATTCTACCTTTTTGACCTATTTTGTGTCTTTCTGC  
TGTGTTTGAAGGGTCCCGTTTTAAAACATTGTTTTGTGGCAGGGAGTGTACATAGGAGC  
CAAGTTTGATTGGTTGCAATTGAGTTGTAATTGGTTGTTAAGGGTACCAAACCCATTAATT  
CTTCTCCATGTAAAGTCAGCCGAAATGATTGAGGCTGATTAGAAGACTAGGGTGTATTAT  
AATACAGGTTCTGGAGTCTCATCCTTGATGATGTAATAATAACAATTATAGTAATCTAGCCT  
AGGCGCGTTACATTTTTATGTGATTGATGCATGTATCACAAGGGCTTGATTCAGGTGAAA  
GGAAGAAAATTAGCTTCTGGCATCAAAGGGGAGGAAGGAAGCAAGTACACACCATCAAT  
CTTTGTATATGACTCACAATAAAGATGGTATTGATGATCAGCAAGCTTGCTTCCTTT  
TGTTCTAACAGTGCTGGAATTCGGCTTGCAAACATGTAAGTATACATTATACTGTAGTGT  
GAGTGATCCACCATTTTTGGCCGATTTTTATTTCCAATTCTGGATTCCTTTGACTC  
>GmHK13 (Glyma05g28070.1)  
GCTACCGTATTATTCTTATCATCTTTGCCTTTCCAAATTCTCCTACTACCTGAACCTCGATGAA  
CAACAACCTATTGCTTTAAAGCTCTTTTTCAGCTTCACTTCCATGTTCAAGTGACCTTTTTTT  
TACAGTGTGCAGCTAGCTTCTAAGAAAAAATAAAAATCTCTAGAACACACTCACGTGCTTG  
TGTTGTTCTTGTTTGGTTCTAGGGCCATGAAGTGCAGCTAGTAGATTTTCTTTGCTGAGTG  
ATAGTGAAAATCGAATCTTTTGTAGGTTTGTAGTTTGTGACCTTCTTTTTGTCTGCGCCTTG  
TTGGTAGCTGCTGCTAGCTGACAAGATAATAAGGAGTATCAATTTCTGTTTAGCATTAGAA  
ACCCAGAATCTTGATTCTTTTATTCTTTAAAGGGTATTTGAATTTTTCTTATCTGCCTCTA  
GTTTCAGTGTTCAATTTGCATTTCTGAATTTAAGCTATTGGGGTGGATAAGACAGCATCTT  
ATCAAGGTCACATCTCTTATTATTATTTTTATTGAAGATGTCTTTTTTATTTTCTTCCCCTT  
CAACCTACTTGTTTTTAGGAATTGGGTTTCTGTTGTTGTTGTTGTTTCATCAAATCTCGAATT  
TTCTTCAATCACAAGCCTAAAAAACAATCTTTTATGTAATAGGTGTGTGTTAGCCTTGTGG  
GGATTCTGTGATTTGACAGCGGTTCTCTCCTCTCCTCTCTCTGTCTCTGTCTCGGTCTC  
TGTCTCTCTCTCTCTCTCACACACACACAAGCCTGCCTGGAATCAGTTAGAGTTGAC  
ACCCGCAACCTGTTTGAACCTGTTTCTTTTTAACCTGTGTTGGTTACTGTTGTGGATGAGTTT  
GCTCCATGTAGTTGGGTTTGTCTAAAAGTGGGGCATCTACTTTTGGTGTCTATGTTGCTGG  
GTTGTGTCTGCTGTTTACCTTAACTGTTTTATTAGCAGTGAATTATGGAAACCAAGATGAT  
GGGTGGTGGTGGTGGTGGCGGTGGCAAGATGTGGCACAATAAATGGTGGGAGAATATAT  
CAGGGCAGGGTTGCAAAATCCACCAACAGTACTACCAGTATATTGGCTCTAAGAAAGTTA  
AGAGAGCGTTGTGGAGGAAGATTTTGTGACATGGGTGCTGGGTTGGTTCATAGTATCTTT  
GTGGATCTTACGCTACATGAGCTTGAAGGTAAGTACTGAGAAGAGGAAAGAACTCTCGCAAG  
CATGTGTGATGAAAGGGCTAGGATGCTGCAGGATCAGTTTAACTGTCAGTATGAACCATAT  
CCAAGCCATGTCCATTCTGATCTCCACCTTTACCATGCTAAGAGCCCTCAGCCATCGAT  
CAGAAAATTTTGAAGTACACAGAAAGAAGCAAGCTTTGAGAGGCCCTTACAAGTGGT  
GTTGCGTATGCTGTAAGGGTGTCTCATTCTGAAAGGGAACAATTTGAAAAGCAGCAAGGT  
TGGACTATCAAGAGGATGGATACTCTAGAGCAGAAACCCGTTTATAAAGATGATTATGCC  
CCAGAGGCTTGGAGCATCCCCGTTTCCAGGAAGAATATGCTCCTGTGTCATCTTTGCACAG  
GATACAATTCACATGTGATTTCTGTTAATGTGCTTTTCTGAAAGGAAGACCGTGAAATG  
TGCTGCGTGCAAGAGAATCAGGCAAAGGCGTTTTAACTGCGCCCTTCAAGGCTGCTCAAAA  
CAAATAGGCTAGGGTTATCCTGACATTTGCTGTCTACAAGAGAGATCTTCCATCAAATGC  
AACCCCAAATGAAAGGATTCAAGCAACTGACGGGTATCTTGGGGGAGTCTTTGATGTTGA  
GTCATTAGTGGAGAAATTAATTCAGCAACTGCTAGCAAGCAAAGTGAATTGTTAATGTG  
TATGATACTACAATCACAATCATCCAATTGCCATGTATGGCTCAAATGAATCAGGGGATG  
TTTTCTTTCACGTCAGCACTCTTAACTTTGGAGACCCTTTTAGGAAGCATGAGATGCACTGC  
AGGTTCAAGCAGAAGCCACCATGGCCATGGGTGGCAATAACTACTTCAATTGGTATCCTT  
GTTATTGCACTCCTTGTGGACATATTTTCCATGCCACTGTGAATCGAATTGCCGAAGTAGA  
AGATGATTATCGTAAGGAGATGGAACCTAAAAACAAGCTGAGGCCGAGATGTTGCAAA  
ATCCCAGTTTCTTGTACTGTTTCCCATGAAATCAGAACCAATGAATGGTGTGTTTAGGG  
ATGTTGCATATGCTTATGGACACAGATCTAGATGTCACCCAACAGGAATATGTCAGGACAG  
CACAGGAAAGTGGAAAAGCTCTGGTGTCACTTATAAACGAGTTTTTGGATCAGGCTAAGA  
TTGAATTTGGTAAGCTAGAGCTTGGAGCTGTGCTCTTTCGACATACGGGCAATTTTGGATGA  
TGTATTGTCACTATTTTCTGAGAAGTCTCAAGGAAAAGGAGTAGAGTTGGCAGTTTTATGTG  
TCAGATCATGTTCCAGAATACTAATAGGTGATCCTGGAAGATTTTCGACAAATAATTACCA  
ATCTCATGGGTAACCTCAATTAAGTTTACAGGACAAAGGACATATTTTTGTCACAATCCATCTT

GTTGAGGAGGTTGTCCGTTCAATAGAGGTTGACAAAGAATCCAACCTCAGAAAATACCTTG  
AGTGGTTCCCCTGTTGCTGATAGTCGCCGGAGCTGGGAAGGATTCAAGGCTTTCAGTCAA  
GAGGGACCTCTTGGTTCCTTCTCATCCCCCTCCAGTGATCTTGTCAATTTGATTGTATCTGT  
TGAGGATACAGGTGAAGGTATTCCTCTTGAATCTCAGCCACTCATCTACACCCCATTATG  
CAGGTAGTCCATCCATCTCCCGAAAGCATGGAGGAACAGGAATTGGCCTAAGCATTAGT  
AAGTGTGGTTGGCCTCATGAATGGGGAATTTGGATTTGTGAGTATACCCAAGACTGGAT  
CCACATTCACTTTTACAGCTGTATTCACCAATGGACACTGCAGTTCAAATGAGTGTAAGT  
TCAGCAAATCAACAACCAACCTCACTCTGCATCTTCAGAATTCGAGGGGATGACTGCATTA  
ATTATTGACCCAAGATCTGTTAGAGCAAAAGTGTCTAGATATCACATCCAACGGCTTGGCA  
TTCATGTTGAGATGGTTTCAGATTTAAACAAGGTTTGTCAACCATAAGCAATGGGAATAT  
AATTATTAATATGGTTTTGATTGAGCAGGAGGTTTGGGATAGAGATTTAGGCTTGTATCTC  
ATTTTGTCAATAACACAAGGAGAATTGATCAGGGGGTTCCTCCAAAGCTGTTCAATCTTGT  
AATTCTAGTAGTTCTTTTAAAGCTAGTGTAACTTGGGTGTTTATAATCCTATTGTATCAC  
CAAACCTCTGAGAGCGAGTATGCTTGTCTGCCTCACTACAACGAGCCATGGGTGTCCAAA  
TAAGGGAGCTCCTCATAGAGAGCTCCAAAGTTTGTCTCTTCGCCATCTTCTTCGTGGCAGG  
AAAATTCTAATTGTAGATGACAATAGTGTGAACCGTGCAGTAGCAGCTGGTGCATTGAAAA  
AGTATGGAGCAGATGTGGTTTGTGTTAGTAGTGGTAAAGATGCCATCTCTTCCTTGAAGCC  
ACCCCATCAGTTTGTATGCCTGTTTCATGGATATTCAAATGCCAGAAATGGATGGATTTGAA  
GCTACAAAGCGAGTTAGGGAGATGGAAGATAGTGTGAACAGAGAAGTATCTATGGATGAC  
TTTGAGAATATTACAACTGGCATGTACCCATTTAGCCATGACTGCAGATGTGATACATG  
CTACACACGAGGAATGCCTAAAGTGGGGCATGGATGGATATGTTTCAAACCCCTTTGAAG  
CTGAACAGCTGTATAGAGAAGTCTCACGGTTTTTCCAGTCATCTTGAAAAGAAAATACAGT  
GCTGATCTAAACCAGATAAACTGATAATGGAAGCATAGCTGTTTGTACTCCAGGACACTCT  
GAAGTGGGTAATAGGTTTCAAGTCTCCTGAGAGTAAGTTCCTATTTAACAGCCAGTGC  
ATGTTTTAGTATTTACCACCTCAAAGTTTGGGGTGTTCCTACTAGAGACTGAAGAATGTT  
ATCTATCTCATCTGAAAGGAAAAAGAAAATGGAACAAAGGGGGACAATATTGTAGAAGTT  
CAGAAATGGTTCATTCTACCTTTTTGACCTATTTTGTGCTTTTCTGCTGTGTGTGAAGGTC  
CCTGGTTTAAACTTTGTTTTGTGGCAGGAGTGTACGTAGGAGCAAAGTTTGATTGGTT  
GCAATTGAGTTGTAATTGGTTGTTAAGGGTAGCAAACCCATATTAATTCTTCTTCCTTGTA  
AACTCAGCCTCTCTTCTCATTCCGAAATGATTGAGGCTGATTGGAAGATTAGGGTGTATTAT  
AATACAGGTTCTGGAGTCTCCTCCTTGTGTATGTAATAATAACAATTATAGTGATCTAGCCT  
AGGCACGTTACATTTTATGTGATTGATGCATGTATCACAAGGGCTTGATTCAGGTGAAAG  
GAAGAAAATTAGCTTCTTGGCATCAAAGGAAGCTAGCCCATCATCAATCTTTGTATATGAC  
TCACAATAAAGATGGTGATTGATGTATCACACCAAGCTTGCTTCTTTTGTCTTAACAGTG  
CTGGAATTCGGCTTGCAAACATGTAAGTATGATACATTATACTCTAGTGTGGAGTGATCCAC  
CATTTTTTGGCCTATTTGTACATTTCCAATTTCTGGATTTCCCTTG

>GmHK14 (Glyma07g27540.1)

TTTGAAGATGCAGAGCCACCATCCTGTGGCTTTGAGGTTACATGATCAAATGGGGTCTAAG  
AGAAAGTACACATTCATTACAGGCTCATAGAGCTTGGCTTCCAAAGTTTCTGCTGCTGTGGA  
TCCTGCTAATGGCTTTGATCAGTTGGTGCATCTATAGCAAATGGATGATGACACTAAAGT  
CCGAAGGAAAGAGGTTTTGGGTAGCCTCTGTGATCAAAGGGCAAGAATGTTGCAAGACCA  
GTTTGTGTTAGTGTAAACCATGTCCATGCCCTTGCATCCTTGTTCACCTTCCATTA  
ACAGATACCCTTCTGCCATTGACCAGGAAACCTTTGCTGAGTACACTGCCCGGACAGCATT  
TGAACGGCCGTTACTGAGTGGTGTGGCCTATGCGCAAAGAGTTGTTAACTCTGAGAGGGA  
GAGATTTGAGAAAGAACATGGATGGGTTATAAAAACAATGGAAGAAAGTCTTCACTGGT  
TAGAGATGAGTATGCACCGGTGATATTCGCGCAAGAACTGTCTCATATCTTGAGTCTCTT  
GATATGATGTCTGGGAGGAGGACCGAGAAAACATTTTAAAGGGCTAGAGCCACTGGGAA  
GGCGGTTCTGACTAGTCTTTCAGTCTTTTGGGTTCTCACCATCTCGGTGTGGTTTTAACAT  
TCCCTGTGTACAAATCTAAGCTCCCTCAGAAGCCAACAGTGAAGAACGCATTGAAGCAA  
CTGCAGGATATGTTGGAGGATCCTTTGATGTTGAGTCCCTTGTAAAGAATTTACTTGGGCA  
ACTTGATGGTAACCAAGCAATTTTGGTGAATGTATATGATATTACAACTATACTAATCCCC  
TAGTCATGTATGGGAACCTATATGAAGAAGCGATATGTCTTGTGCATGAAAGCAAGCT  
TGATTTTGGAGATCCATACAGGAAACATCAGATGATATGTAGGTACCATCAGAAGGCACC  
GACAACTGGATAGCTCTTACCACGGCATTCTATTCTTTGTGATTCTTTTTTGTGGGTT  
ACATTTTATATGGTGCTGGAAACCATATTGTCAAAGTTGAAGATGATTTCCATGCAATGGA  
GGAATTGAAAGTCCGAGCAGAAGCAGCTGATATTGCCAAGTCCAGTTTCTAGCTACGGT

CTCTCATGAAATTAGAACACCCATGAATGGTATTTTAGGAATGCTTGCTCTGCTTCTAGATA  
CAGAATTGAGTTCAACCCAACGAGATTATGCTCAGACTGCTCAAGCATGTGGAAAGGCAC  
TCATAACATTAATAAATGAGGTGCTTGACCGTGCTAAAATTGAAGCTGGCAAGCTAGAGCT  
GGAGGCTGTTCCATTTGATCTTCGTTCCATAATTGATGATGTTCTTTCTTTTTCTGAGAA  
ATCTAGACACAAAGTTTAGAGCTGGCTGTGTTTGTTCGACAAAGTTCCGGATATTGTC  
ATGGGAGATCCTGGGAGATTACAGACAAATAATAACAAATCTTGTTGGCAACTCTGTTAAAT  
TACTGAACAAGGGCATATATTTGTTAAAGTTCATCTAGCAGACAATCGAAAGTCCATAAT  
GAATGGAAAACACGATACTTTTCTAAATGGAGAATCAGATGAAGTTTTCCATATATCTGGT  
GATTATCATTCAAACCTTAAGTGGATGTGAAGCTGCCGATGAACGGAATAGTTGGGATA  
ATTTAAGCATCTAATCGCTGACGAAGAATATGGCCTTGATTCTTCTAGAGAAACAATGGC  
TGCTTGTGAATCTTCTGAGCAAGTCACCTTGAGGGTGTGCGTGGAGGACACTGGAATTGG  
AATTCCTTCTCAGCTCAGGATGGGATATTCATGCCATTTGTGCAGGCTGACAGCTCAACC  
TCACGAAATTATGGGGTACTGGTATTGGCTTGAGTATCAGTAAATGTCTGGTTGAGCTAA  
TGGGTGGTCAGATAAACTTCATAAGTCGACCCAGGTTGGGAGCACCTTTCTTTACTGC  
AGTTTGAAGCATTAAAGAAAAGTTACGTTACCAACAAGAAGAAAAATTTGGAAGATCTG  
CCTTCAAGTTTTAGAGGGATGAAAGTCATTGTGGTTGATGGGAAGCCTGTTAGAGCTGCTG  
TGACTIONTACTTTGAAGAGACTAGGGATACTAGTTAAAGTTGCAAAATAGGATCAGTAA  
GGCTGTTGCTTTATGTGGTAAGAGTGGTTCTTTGAAATCGGGAATGTTCCAGCCTGATATT  
ATCATGGTTGAGAAGGACACATGGATAACTGGAGAGGATGGCATTTTCAATACATGGAAA  
CATAATGGTCGTACGATTAAGATGCCTAAAATGATCCTTCTGGCAACCAATATTAGTAATG  
CCGAATTTGATAAAGCTAAGTTCACGGGTTTCACTGATACTGTGATCATGAAGCCTCTGAG  
AGCTAGTATGGTGGCTGCTTGTCTTCAGCAAGTTTTGGGTATGGGAAGAAGAGGCAGCT  
AGGGAAGACATGCCTAATGGTTTTCTACATAGCCTTCTCTATGGAAAGAAAATTTGGTG  
GTTGATGACAATGGGGTAAACCGGAGGGTTCAGCAGGTGCACTAAAGAAGTTTGGAGCT  
GATGTGAAGTGTGCTGAAAGTGGCAAAGTCGCCCTTCAAATGCTGCAATTGCCTCACAAAT  
TTGATGCTTGCTTCATGGACATCAAATGCCAGAAATGGACGGATTTGAAGCAACTAGTAG  
AATTCGGATGATGGAGAGCAAGGCAAATGAGGAGATGAATGGCAGTGAGTGGCATGTAC  
CTATACTGGCCATGACAGCTGATGTGATCCTTGCTACGTACGACAAGTGCCTGAAATGTG  
GCATGGATGGATACGTCTCAAAGCCATTTGAGGAAGAGAATCTGTATCAGGAAGTTGCAA  
AGTTTTTCAAATCCAAGACCATCTCAGACTCATGA

>GmHK15 (Glyma02g09550.1)

CTTGAAGATGCAGAACCACCATCCTGTGGCTTTGAGGTTGCATGATCAAATGGGGTCTAA  
GAGAAAGTACACTTTCATTCAAGCTCATAGAGCTTGGCTTCAAAGTTTCTGCTGCTGTGG  
ATCCTGCTAATGGCTTTGATCAGTTGGTGCATCTATAGCAAATGGATGATGACACTAAAG  
TCAGAAGGAAAGAGGTTTTGGGTAGCCTCTGTGATCAAAGGGCAAGAATGTTGCAAGACC  
AGTTTAGTGTAGTGTAAACCATGCCATGCCCTTGCCATCCTTGTTTCAACCTTCCATTAC  
TACAGTTACCCTTCTGCCATTGACCAGGAAACCTTTGCTGAGTATACAGCCAGGACGGCCT  
TTGAAAGGCCATTGCTGAGTGGTGTGGCCTATGCACAAAGAGTTGTTAACTCTGAGAGGG  
AGAGATTTGAGAAAGAACATGGATGGTGCATAAAGACAATGGAAAGAAGTCTTCACTGG  
TTAGAGATGAGTATCGCCGGTGTGATCTTCGCGCAACAACACTGTCTCATATCTTGAGTCTAT  
TGATATGATGTCTGGGAGGAGGATCGAGAAAACATTTAAGGGCTAGAGCCACTGGGAA  
AGCGGTTCTGACTAGCCCTTTCAGGCTGTTGGGTTCTCACCATCTTGGTGTGGTTTTAACAT  
TCCCCGTGTACAAATCTAAGCTCCCCCAGAAGCCAACAGTGGAAAGAACGCATTGAAGCAA  
CTGCAGGATATGTTGGAGGATCCTTTGATGTTGAGTCCCTTGTAAGAATTTACTTGGGCA  
ACTTGATGGTAACCAAGCAATTTTGGTGAATGTATATGATGTTACAACTATACTAATCCCC  
TAATCATGTATGGCAACCAATATCAAGAAGGCGATATGTCTCTTGCCCATGAAAGCAAGCT  
TGATTTTGGAGATCCATACAGGAAACATCAGATGATATGTAGGTACCATCAGAAGGCACC  
GACAAATTGGATAGCTCTTACCACGGCATTCTATTCTTTGTGATACTTTTTTTAGTGGGTT  
ACATTTTATACAGTGTGGAATCATATTGTTAAAGTCAAGATGATTTCCATGAAATGCA  
GGAATTGAAAGTCCGAGCAGAAGCAGCTGATGTTGCCAAGTCCCAGTTTCTAGCTACGGT  
CTCTCATGAAATTAGAACACCCATGAATGGTATTTTAGGAATGCTTGCTCTGCTTCTGGATA  
CCGAATTGAGTTCAACCCAACGAGATTATGCTCAGACTGCTCAAGCATGCGGCAAGGCAC  
TGATAACATTAATAAATGAGGTGCTGGACCGTGCTAAAATTGAAGCTGGCAAGTTAGAGCT  
GGAGGCTGTTCCATTTGATCTTCGGTCCATAATTGATGATGTCCTTTCTTTTTTCTGAGA  
AATCTAGACACAAAGGTTTAGAGCTGGCTGTGTTTGTTCGACAAAGTTCCAGATATTGT  
CATGGGAGATCCTGGGAGATTCAGACAAATAATAACAAATCTTGTTGGCAACTCTGTTAAA

TTTACTGAACAAGGGCATATATTTGTTAAAGTCCATCTAGCGGACAACCGAAAGTCCATGA  
TGAATGGAAAACACGAGACTTTTTCTAAATGGAGAATCAGATGAAGTTTTCTATATATCTGG  
TGATTATCATTTCAAACCTTAAGTGGATGTGAAGCAGCTGATGAACGGAACAGTTGGGAT  
AATTTAAGCATCTAATAGCTGACAAAGAATATGGCCTTGATTCTTCTAGAGAAACAATGG  
CTGCTTGTGAATCTTCCGAGCAAGTCACATTGAGGGTATGCGTGGAGGACACTGGAATTG  
GAATTCCTTTCTCAGCTCAGGATAGGATATTCATGCCATTTGTGCAGGCTGACAGCTCGAC  
CTCACGAAATTATGGGGGACTGGAATTGGCTTGAGTATCAGTAAATGTCTGGTTGAGCTA  
ATGGGTGGTCAGATAAACTTCATAAGTTCGACCCAGGTTGGGAGCACCTTTTCTTTACTG  
CAGTTTGTGGAGCATTAAAGAAAAGTTCAGTTACTGACAAGAAGGAAAATTTGGAAGATCT  
GCCTTCAAATTTTAGAGGGATGAAAGTCATTGTGGTTGATGGGAAGCCTGTTAGAGCTTCC  
GTGACTAGATAACATTTGAAGAGACTAGGGATACTAGTTAAAGTTGCAAATAGCATCAGTA  
AGGCTGTTGCTTTATGTGGTAAACTGGTCTTTGACATCAGGAATGTTCCAGCCCGATATT  
ATCATGGTTGAGAAGGACACATGGATATCTGGAGAGGATGGCATTTCATATATGGAAA  
CAGAATGGTCGTATGTTAAGATGCCTAAAATGATCCTTCTGGCAACCAATATTATTAGT  
CCGAATTTGATAAAGCTAAGGCCACAGTTTTACTGATACTGTGATCATGAAGCCTCTGAG  
AGCTAGTATGGTGGCTGCTTGTCTTCAGCAAGTTTTGGGGATGGGAAGAGGAGGCAGCT  
AGGGAAGACATGCCTAATGGTTTTCTACATAGCCTTCTCTATGGAAAGAAAATTTTGGTG  
GTCGATGACAATGGGGTAAACCGGAGAGTTGCAGCAGGTGCACTAAAAAAGTTTGGTGCT  
GATGTGAAGTGTGCTGAAAGTGGCAAAGCCGCACTTGAAATGCTTCAATTGCCTCACAAAT  
TTGATGCTTGCTTCATGGACATTCAAATGCCAGAAATGGACGGATTTGAAGCAACCAGCC  
GAATTCGGATGATGGAGAGCAAGGCAAATGAGGAGATGAATAATGGGAATGAGTGGCAT  
GTGCCTATACTGGCCATGACAGCTGATGTGATCCATGCTACATACGACAAGTGCATGAAAT  
GTGGCATGGATGGATATGTCTCAAAGCCATTTGAGGAAGAGAATCTGTATCAGGAAGTTG  
CAAAGTTTTTCAAATCAAAAACCATGTCAGATTCATGA

>GmHK16 (Glyma05g34310.1)

ATGGCCTTGAAGTTACATGAGCAAGCGGGGAGCATAAGAAAGTACACTTTCATT CAGGCA  
CATAGGGCATGGCTGCCCAAGTTTTTATGCTGTGGATCCTTCTCATGGCTCTAATTGGCT  
GTTTCATCTATAGTAAAATGGATGCTGACACTAAGGTTAGAAGGAAAGAGGTGCTGGGTA  
GCCTCTGTGATCAAAGGGCAAGAATGCTGCAAGATCAATTCAGTGTCAAGTGTCAACCATG  
TCCATGCCCTTGCCATCCTTGTTTTCAACCTTCCATTACTACAGAACCCCTTCTGCCATTGAC  
CAGGAAACCTTTGCAGAGTATACAGCCCGGACAGCATTGAACGACCATTACTCAGTGGG  
GTGGCCTATGCACAAAGAGTAGTTAACTCAGAGAGGGGAACATTTGAGAAGCAACATGGA  
TGGGTTATAAAGACAATGGAAGAGAGCCTTCACTGGTTAGAGATGAGTATGCACCGGTG  
ATATTTGCGCAAGAAACACTCTCTTACCTCGAATCTCTTGATATGATGTCCGGGGAGGAGG  
ACCGAGAGAATATTTGAGGGCTAGGGCCACTGGGAAAGCTGTTCTCACTAGTCCTTTCAA  
TCTGTTGGGTTCTCATCATCTTGGTGTGGTTTTAACATTTCTGTTTATAAATCTAAGCTCCC  
TCCAAAGCCGACAATGGAAGAGCGCATTAAAGCAACTGCAGGATATGTTGGAGGATCCTT  
TGATGTTGAGTCCCTCGTGGAGAATTTACTTGGTCAACTTGCTGGTCACCAAGCAATTTT  
GTGAACGTATATGATACACAAATCTACTAACCCCTTAATCATGTATGGCAACCAAAAACG  
AAGAAGGTGATATGTCTCTTGTCCATGAAAGTAAAGCTTGATTTTGGAGATCCATACAGGAA  
CCATACAATGATATGTAGGTATCACCAGAAGGCACCAACAAATTGGATAGCACTTACCAC  
GGCATTCTTATTCTTTGTGATTCTTTTATTAGTGGGTTATATTTTATATGGTGCTGGAATCA  
CATTGTCAAAGTAGAGGATGATTTTCATCAAATGGAGGAATTAAGTCCGAGCAGAAGC  
AGCTGATGTTGCCAAGTCACAGTTTCTAGCTACTGTCTCTCATGAAATCAGAACACCCATG  
AATGGCATTCTAGGAATGCTTGGTCTGCTTCTAAAGACAGAATTGAGTTCAACTCAACGAG  
ATTATGCCCAGACTGCTCAAGCATGTGGGAAGGCTCTGATAGCCTTAATAAATGAGGTACT  
TGACCGGGCTAAAATTGAAGCTGGCAAGTTAGAGCTGGAAGCAGTTCCATTTGACATTG  
TTCCATACTTGATGATGTCCTTTCTTTTTTCTGAGAAGTCCAGGAACAAAGGTTTAGAGC  
TGGCGGTGTTTGTCTGATAAAGTTCCAGATATTGTTATGGGAGATCCTGGGAGATTGAG  
ACAAATAGTAACAAATCTTGTGGCAACTCTGTTAAATTCAGTGTGAGCGAGGACATATATT  
GTGAAAGTCCATCTATCTGAAAATAGTATGTCCACAATGAATGGAAAACTGAGAAATTTA  
TAAACAGAGGATCAGGCGAACCTGTGCATATGTCTGGTGCTTATAATTCAAAACCTTTAAG  
TGGATATGAAGCAGCTGATGAGCGGAACAGCTGGGACAATTTAAGCATCTAATTGCTGA  
TGAAGAATTTTTCTTTGATGCTTCTGTTAAAAGGCAGCCAGTGAATCTTATGAGCAAGTCA  
CCTTGATGGTCAGTGTGGAGGACACTGGAATTGGAATTCCTTTCTCAGCCCAAGATAGGAT  
TTTCATGCCTTTTGTGCAGGCAGACAGCTCAACCTCTCGACATTATGGTGGTACTGGCATT

GGCTTGAGTATCAGTAAATGCCTGGTTGAACTAATGGGTGGTGAAGATAAGTTTCATAAGCC  
AACTGCAGGTTGGCAGCACATTTTCATTTACTGCAGGTTTTGGAACGATTGAGAAAAATGC  
AATAACTGACATGAAGAAACATAATTTGGAAGATCTGCCTTCCAATTTTAGAGGGCTTAAA  
GCCATAGTGGTTGATGGAAAACCTGTTAGAGCAGCAGTGAAGTACTAGATACCATCTGAAGAGA  
CTAGGGATACAAGCTAAAGTTGCAAATAGCATCAATAAGGCTGTTTCTTTATGTGGGAAAA  
ATGTTTCTTTGACCTCGGTATTATTTTCAGCCGATATTATTTTTGTTGAGAAAGATTCATGG  
GTTTGTGGAGAGGACGAGATCTTCAATGTGTGGCAACTGGACTGGAAACAAAATGGGCAT  
ATGTTAAGATACCTCAAATGATCCTTCTTTCGACCAACATCGGTAATGCTGAATTTGATAA  
AGCTAAAGCTGCAGGTTTCAGTGATACTGTGATCATGAAGCCTCTAAGAGCTAGCATGGT  
GGCTGCTTGTCTTCAGCAAGTTCTTGAACAGGGAAGAAGAGGCAGCATGGGAAAGACAT  
GAAGCCTAATGGTTCACCTTTGGTACGAAGCCTTCTTTGTGGGAAAAAAATCTTAGTGGTT  
GATGACAATGTGGTAAACCGGAGGGTCGCTGCAGGTGCATTAATAAATTTTGGAGCTGAT  
GTGACGTGTGCAGAAAGTGGCAAACCTGCTCTTGAATGCTGCAGTTGCCTCACAAATTTG  
ATGCTTGTTCATGGATATTCAAATGCCAGAAATGGACGGGTTTCAAGCAACTCAGCGAAT  
TCGGATGATGGAGACAAAGGCAAATGAGCAGCAGATGAATGGTGAAGGAAATGGGTGGA  
AAGACAAGTACCATATACCTATATTGGCCATGACAGCTGATGTAATTCAGCCACATATGA  
TGAGTGCCTGAAATATGGGATGGATGGATACGTCTCAAAGCCTTTTGGAGGAAGAAATCT  
GTATCAAGCAGTTGCAAAGTTTTTCAACCCCAAGCCTACCACAGACAACAGCCTAATAGA  
AAATGGCAGAACTTAAAAGCAACTTAATGTTAATGAAAGACACTTACTTTCACTACTGG  
CATTTTTTCGTAGTTTGTGTTAATTTGAATGTGCTTTAATCAGTTGGTTTTTGAAGATATCT  
GAGGATATGCATACAACAGGCATATGCAGTGATCATTCTAACCACCAGCTGAACATGATT  
TCAATCTGAGTAAATGTATACCACTACCTCAACTTGTGTACAGATTCTCCCACGGGATG  
AGGAAAATCATGTAAATTCATATATTTTTTTTTCTTTCTTTTGCATCTCCCGATACTTCCC  
TATGATTAGGGTTTCACTATTATTATTTTTTTTTCTCTGTAAAATTTTCTCGTATAGGATTTT  
GGTAGTCACTATATTCAGAAGAAAAGGGTTGGTTGGTGCTAATAATGCCTAGATCGCATTG  
GC

>GmHK17 (Glyma08g05370.1)

ATGAAGAGCCTGAGGCACCATCCATGGCCTTGAAGATACATGAGCAAGCGGGGAGCAA  
AAGAAAGTACACTTTCATTCAGGCACATAGGGCCTGGCTTCCAAGTTTTTGTGCTGTGG  
ATCCTTCTCATGGCTCTAATTGGCTGTTTCATCTTTAGTAAAATGGATGCTGACACTAAAGT  
CAGAAGGAAAGAGGTGCTGGGTAGCCTCTGCGATCAAAGGGCTAGAATGCTGCAAGATC  
AATTTAGTGTAGTGTCAACCATGTCCATGCCCTTGCCATCCTTGTTTCAACCTTCCATTAC  
TACAGAACCCCTTCTGCCATTGACCAGGAAACCTTTGCAGAGTATACAGCCAGGACAGCA  
TTTGAACGGCCATTACTCAGTGGGGTAGCCTATGCACAAAGAGTAGTTAACTCAGAGAGG  
GAAACATTTGAGAAGCAACATGGTTGGGTATAAAGACAATGGAAGAGAGCCTTCACTG  
GTTAGAGATGAGTATGCACCGGTGATATTTGTGCAAGAACTCTCTTACCTCGAATCTA  
TTGATATGATGTCCGGGGAGGAGGACCGAGAAAATATTTTGGGGCTAGGGCCACTGGGA  
AAGCTGTTCTCACTAGTCTTTTTAGGCTGTTGGGCTCATCATCTTGGTGTGGTTTTAACA  
TTTCTGTTTATAAATCTAAGCTCCCTCCAAGCCAACAATGGAAGAGCGAATTAAGCAA  
CTTCAGGATATGTTGGAGATCCTTTGACGTTGAGTCCCTCGTGGAGAATTTACTTGGTCA  
ACTTGCTGGTACCAAGCAATTTTGGTGAACGTATATGATATCACAACTCTACTGACCAC  
TTAATCATGTATGGCAACCAAAAACGAAGAAGGTGATATGTCTCTTGTCCATGAAAGTAAGC  
TTGATTTTGGAGATTCATACAGGAAACATACAATGATATGTAGGTATCACCAGAAGGCACC  
AACAAATTGGATAGCACTTACCACAGCATTCTTATTCTTTGTAATTTCTTTTATTAGTGGGTTA  
TATTTTATATGGTGCTGGAATCACATTGTCAAAGTAGAGGATGATTTTCATCAAATGGAG  
GAATTAAGTGCAGCAGAAAGCAGCTCATGTTGCCAAGTACAGTTTCTAGCTACTGTCT  
CTCATGAAATTAGAACCCCATGAATGGCATTTTAGGAATGCTTGGTCTGCTTCTAAAGAC  
AGAATTGAGTTCAACTCAACGTGATTATGCCAGACTGCTCAAGCATGTGGGAAGGCTCT  
GATAGCATTAAATAATGAGGTACTTGACCGGGCTAAAATTGAAGCTGGCAAGTTAGAGCT  
GGAAGCTGTTCCATTTGACATTCGTTCCATACTTGATGATGTCCTTTCTTTTTTCTGAAAA  
GTCTCGGAACAAAGTTTTAGAGCTGGCGGTGTTTGTCTGATAAAGTTCCAGATATTGTT  
ATGGGAGATCCTGGGAGATTACAGACAAATAGTAACAATCTTGTGGCAACTCTGTTAAT  
TCACTGAGCGAGGACATGATTTTGTGAAAGTCCATCTATCTGAAAATAGAATGTCCACGAT  
GAATGGAAAAATTGAGAAATTTCTAAACGGAGGATTGGACGAACCTGTGCATATGTCTGG  
TGGTTATAATTCAAAACCTTTAAGTGGATATGAAGCAGCTGATGAGCGGAACAGCTGGGA  
CAATTTAAGCATCTAATTGCCGATGAAGAATTTTTCTATGATGCTTCTGTTAAAGGGTGG

CAAGCGAATCTTATGAGCAAGTCACCTTGATGGTCAGTGTGGAGGACACTGGAATTGGAA  
TTCTTTCTCAGCCCAAGATAGGATTTTCATGCCTTTCTGTCAGGCAGACAGCTCAACCTC  
TCGACATTATGGTGGTACTGGCATTGGCTTGAGTATCAGTAAGTGCCTGGTTCGAACTAATG  
GGTGGTGAGATAAGTTTCATAAGCCAACCGCAGGTTGGGAGCACATTTTCATTTACTGCAG  
ATTTTGAACAATTAAGAAAAATGCAATAACTGACATGAAGAAACATAATTTGGAAGATCT  
GCCTTCCAATTTTAGAGGGCTTAAAGCCATAGTGGTTGATGGAAAACCTGTTAGAGCAGCA  
GTGACTAGATACCATCTGAAGAGACTAGGGATACAGGCTAAAGTTGCAAAATAGCTTCAAT  
AAGGCTGTTTCTTTATGTGGGAAAAATGGTTGTTGACCTCGGGATTATTTAGCCCGATAT  
TATTTTTGTTCGAGAAAGATTCATGGGTTTGTGTAGAGGATGGGATCTTCAATGTGTGGCAA  
CTGGACTGGAACAGAATCGGCATATATTTAAGATACCTCAGATGATACTTCTTGCAGCCA  
ACATCGGTAATGATGAATTTGATAAAGCTAAAGCTGCAGGTTTCAGCGATACTGTGATCAT  
GAAGCCCCTAAGAGCTAGCATGGTGGCTGCTTGTCTTCAGCAAGTTCTGGGAACGGGGAA  
GAAGAGGCAACACGGGAAAGACATGAATCCTAATGGTTCCACTTTTGAAGAAGCCTTCTT  
TGCGGGAAAAAATCTTAGTGGTTGATGACAATGTGGTAAACCGGAGGGTAGCTGCAGG  
GCATTAATAAATTTGGAGCTGATGTGACGTGTGCAGAAAGTGGCAAAACTGCTCTTGAAA  
TGCTGCAGTTGCCTACAATTTTGTGCTTGCCTTTCATGGATATTCAAATGCCAGAAATGGA  
CGGGTTTGAAGCAACTAGGCAAAATTCGGATGATGGAGACAAAGGCAAAATGAGCAGCAGA  
TGAATGGTGAATGTGGTGAAGGAAATGGATGGAAAGACAAGAAGTACCATATACCTATAT  
TGGCCATGACAGCTGATGTGATTCACGCAACATACGATGAGTGCCTGAAATGTGGGATGG  
ACGGATATGTCTCAAAGCCTTTTGGAGGAGAGAATCTGTATCAAGCAGTTGCAAAGTTTTT  
CAACCCCAAGCCTACCTCAATACAACAAAATGCCAGAACTGGAAAAGCAACTTAATGTTA  
ATTGCAAAGTTTTTCACTCTCTCACTACTGCCATTTTTCTAGTTGGCTGCTAAATGGTAATT  
TCAATGTGCTTTTTTCAATCAGTTGGTTTTCAAGATATCTGAGGATATGCATGCAATGCAAC  
TTGATACACACACCACGCATATGCAGTGATCATTCTAACCACCAGCTGAACATCATGAGT  
AAAAAAAATATGTATACCACTACCCCAACTTGTGTACAGTACAGATTCTCCACGGGATGA  
GGAAAATCATGTATATTCAATATTTTTTTTTTATCTTTTGCATCTCTCGATACTTCCCTACTGT  
GATAAGGGTTTCACTATAGTTTCTCTATTATTATTATTTTTTTCTGTAAAATTTTCTGGTATAT  
TAAGATTTGGTTAGTTACTATATTCAGACGAA

>GmERS1 (Glyma19g40090.1)

GCATATTTATTTAAATACGCCCTTTTATTCATTTCCGCTAGATTTTATCAGGATTCCAGCGA  
TTGTTTCGTTACCAGCAATGATCCGTTTCATACGGTGGTTAGATGATGGAATCCTGTGATTGT  
ATAGACACACAGTATCCTCCAGATGAACTTCTCGTAAAGTATCAGTATATCTCGGATGTGC  
TAATTGCTCTTGCCTATTTTTCTATTCCTGGAGCTCATCTATTTTGTTCAGAAGTCTGCTT  
TCTTTCCATATAGATGGGTGCTTATGCAGTTTGGTGTCTTTATTGTTCTCTGTGGAGCAACT  
CATTTCATAAACCTGTGGACATTCTCCCACACTCTAAGGCTGTTGCTGTTGTCATGACGAT  
TGCCAAAGTGTGCGTGTGCTATTGTGTCATGTGCGACTGCTCTGATGCTTGTACACATTATTC  
CCGATCTGTTGAGTGTCAAGACGCGCAATTATTCCTGAAGAACAAGGCTGAAGAGCTTG  
ACAGGGAGATGGGACTTATTCTTACTCAAGAAGAGACTGGAAGGCATGTTAGAAGTTGA  
CTCATGAAATAGGAGCACACTTGACAGTGCATACTATTTTAAAGACTACTCTTGTGGAGCT  
GGGAGGACTTTGGGCTTGGAGGAGTGCATTATGGATGCCTTCAAGAAGTGGTCTGAA  
TCTGCAACTTTCCATACTTTAACCTACCACGTGCAAGTTGGGTCTACAGTGCAAACAAC  
AATCCTATTGTCAATGAAGTTTTCAACAGTCTCGAGCTATGCGGATACCACCAACCTGTC  
CACTGGCCAGGATCAGACCTCTTGTGGGAAGATATGTGCCGCTGAAGTTGTTGCTGTTT  
GGGTGCCACTTCTAAATTTGTCCAATTTTCAAATCAACGATTGGCCCGATATGTCAGCAA  
AAGCTATGCAATCATGGTTCTCATCCTCCCTACTGATAGTGTTAGAAAATGGCGAGACCAT  
GAGTTGGAACCTTGTGATGTGGTTGCAGATCAGGTAGCAGTTGCCCTTTCACATGCTGCTA  
TTTTGGAGGAGTCTATGCGAGCCCGTGATCAACTCTTGGAGCAGAATGTCGCTTTAGATTT  
AGCTCGGCAAGAGGCAGAGATGGCAATTCATGCCCGCAACGATTTTCTTGGCGTCATGAA  
TCATGAAATGAGGACGCCAATGCATGCAATTATAGCATTGTCATCCCTTCTCTTGGAGACT  
GAACTGACTCCAGAGCAGAGGGTTATGATAGAGACAGTGTGAAGAGTAGTAATGTTTTG  
GCGACACTCATTAATGATGTTCTAGATCTTCTCGACTTGAAGATGGTAGCCTCGAATTAG  
AAAAGGGAAAATTCACCTTTCATGGTGTGTTGGGAGAGATCGTTGAACTGATAAAACCAAT  
AGCATCTGTGAAAAGTTACCTATCACCTTAATTCTGTCTCCTGATCTGCCTACTCATGCCA  
TTGGTGTGAAAAGCGACTTACACAACTCTTTTGAATGTTGTGGGTAATGCTGTCAAATT  
CACTAAGGAGGGCTATGTTTCTATAAGAGTATCGGTTGCAAACCGAATCTTTACAGGAT  
TGCGCACCTCCAGAGTTTTATCCAGCATCTAGTGATGGCCATTTCTACATACGAGTCCAGG



TTAAGGACTCTGGATGTGGCATTCCCCACAAGAAATTCCGCATCTCTTTACCAAGTTTGC  
CCAGTCTCGGAGTGGACCAGCTCGACCTAGCAGTGGTGCAGGTCTTGGGCTTGCCATTTG  
TAAAAGATTTGTAACCTCATGGGAGGCCACATATGGATTGAGAGTGAGGGTCCTGACAA  
AGGAAGCACAGCTACATTTATAATCAAACCTTGAGATTTGTGGCAATCCAGATCCATCCGAT  
CATCAAGCTGCAAACAGAAGCCAAGCATACAGTGGGAAGTGGTGGCCTCGCTAGATTTAAA  
CCCTTCATCAAAGATGAAGACGACACTGGTTTTTCTACTAGACGCAATCAAAGAAGTTTTCT  
AATATCCAAGACACCAACATTGCATACCTTTCGATCACAGTCGACAAGATGGAGTACACAT  
ACTTTTCATTTGCATGTGTCTAAATTGTATAATTTACAGTTTGCAGCTGTAGAATAGGAATAC  
TATGTCAGGCATATTTCTAACAACAAGTCTTATGTGAACTCCTGCCGATTAACTAGAATA  
CAATGCAATGAAACAATTTGAGAGACAATCCGTTACTTAATTTGACTTGTAGTATATATTG  
TGTTAGTGCCTTGTTACTTTTTTTCCGGCTTTTTAATGAACCAATGTTTACTTATATTTCC

>GmERS2 (Glyma03g37470.1)

CCGTGAGGGAGAGAGCTTAAGGATTAATGAATGCTTTTTAACTACTCTCACACTCTTTCT  
TCCTTTCTTCTTTCTTCTTCTTCTTCTTCTTCTTCTTCTTCTTCTTCTTCTTCTTCTTCT  
ATCCACCTGTGTTTCTTCTTCTTCTTCTTCTTCTTCTTCTTCTTCTTCTTCTTCTTCTTCT  
GATTGTATAGATACGCAGTATCCGCCGATGAACCTTCTTGTGAAGTATCAGTATATCTCGG  
ATGTGCTAATTGCTCTTGCGTATTTTTCGATTCCGGTGAGCTCATCTATTTTGTTCAGAAG  
TCTGCTTTCTTCCGTATAGATGGGTGCTTATGCAGTTTGGTGCCTTTATTGTTCTCTGTGGA  
GCAACTCATTTATAAACCTGTGGACATTCTCTCCGCACTCTAAGTCTGTTGCTGTTGTCAT  
GACGATTGCCAAAGTTTCGTGTGCTATTGTGTCATGTGCGACGGCACTGATGCTTGTACAC  
ATTATCCCGATCTGTTGAGTGTCAAGAGGCGCAATCGATCCTCAAGAACAAGGCTGAA  
GAGCTTGACAGAGAGATGGGACTTATTCTTACTCAGGAAGAGACGGGAAGACATGTTAGA  
ATGTTGACTCATGAAATTAGGAGCACACTTGACAGGCATACAATTTAAAGACTACTCTTG  
TGGAGCTGGGGAGGACTTGGGCTTGGAGGAGTGTGCATTATGGATGCCTTCGAGAAGTG  
GTCTGAATCTGCAACTTCCCATACTTTAACCTATCATGTGCAAGTTGGGTCTACGGTGCA  
AACAACAATCCTATTGTCAATGAAGTTTTCAACAGCCCTCAAGCTATGCGGATACCACCC  
ACCTGTCCATTGGCCAGGATCAGACCTTGTGTTGGGAAGATATGTGCCCCCTGAAGTTGTTG  
CTGTTCCGGTGCCGTTTTGAATCTGTCAAATTTCAAATTAACGATTGCCTGATATTTCA  
GCAAAGAGCTATGCAATCATGGTTCTCATCCTCCCTACTGACAGTGTAGAAAATGGCGAG  
ACCATGAGTTGGAACCTGTTGATGTTGTGTCAGATCAGGTAGCAGTTGCCCTTTCACATGC  
TGCTATTTTGGAGGAGTCTATGCGTGCCCGTGATCAACTCATGGAGCAGAATGTTGCTTTA  
GATTTAGCCCGGCGAGAGGCAGAGATGGCAATTCATGCTCGCAATGATTTTCTTGCTGTCA  
TGAATCATGAAATGAGGACACCAATGCATGCAATTATAGCATTGTCATCACTTCTTGGGA  
GACTGAACTGACGCCAGAGCAAAGGTTATGATAGAGACAGTGTGGAAGAGTAGTAATGT  
TTTGGCAACTCATTAAATGATGTTCTAGATCTTCTCGACTTGAAGATGGTAGCCTCGAAT  
TAGAAATGGGAAAATTCAACCTCCATGGAGTTTTGGGAGAGATTGTTGAACTGATAAAACC  
AATAGCATCCGTGAAAAGTTACCTATCACCTAATTCTGTCTCCTGATCTGCCTACTCATG  
CCATTGGTGATGAAAAGCGGCTTACACAAACTCTTTGAATGTGCGTGGGTAAATGCTGTCAA  
ATTCATAAGGAGGGCTATGTTTTCTGAAGAGTATCAGTTGCAAACCAGAATCTTCAGAC  
GATTGGCAGCTCCAGAGTTTTATCCAGCATCTAGTGATGGCCATTTCTACATTTCCGAGTCC  
AGTTAAGGACTCTGGATGTGGGATTCTCCCACAAGATATTCCGCATCTCTTACCAAGTT  
TGCCAGTCTCGGAGTGGACCAGCTCGACCTAGCAGTGGTGCAGGTCTTGGGCTTGCCAT  
TTGTAAGATTTGTAACCTCATGGGAGGCCACATATGGATTGAGAGTGAGGGCCTTGA  
CAAAGGAAGCACAGCTACATTTATAGTCAAACCTGGGATTTGTGGCAATCCAGATCCATCC  
GATCATCAAGCTGCAAACAGAAGCCAAGCATATAGTGAAGTGGTGGCCTCGCTAGATTT  
AAACCCTTCATCACAGATGAAAACGACACTGGTTTTTCTACTAGACGCAATCAAAGAAGTT  
TCTAATATCCAAGACACCAAATTTGCATACCTCTCAATCACAGTCGACAAGATGGAGTAAA  
CCTCCTACTTTTCAATTTGCATGTGCTAAATTGTATAATTTGCAGTTTGCGGCTGTAGAATAG  
GATTACTATGTCAGGCATATTTCTAACAACAGGTTTTATGCGAACTCCTGTTGTATTA  
AGAATACAATACAACAAAACAAAGTTGAGAGACGATCTGTTACTTAATTTGACTTGTAGTA  
TATATTGTCAGTGGCTTTTCCGTTTTAGCGTTCATAAAAATGACAGTATTGGCATG

>GmETR1 (Glyma09g00490.1)

ATGGAATCCTGCAATTGTATTGACCCACAAGTGCCAGCTGATGACTTATTGATGAAATACC  
AATATATCTCTGATTTCTTCAATTGCCCTGCTTATTTCTCAATCCCTTGGAGCTTATCTACT  
TTGTTAAGAAATCAGCAGTATTTCCATATAGATGGGTCCCTGTTTCAGTTTTGGTGCCTTCA  
GTTCATTTATGTGGAGCAACACATCTAATTAATTTATGGACATTTAGAATTCATTCAAGA  
ACTGT

GGCTGTTGTAATGACCACTGCTAAGGTTTTAACTGCTGTGGTATCGTGTGCAACTGCCCTC  
ATGCTGGTACATATTATTCCTGATTTATTAAGTGTTAAAAGTATGGGAATTATTTTTGAAGAA  
CAAGGCTGCAGAGCTTGATAGAGAAATGGGCCTGATTTCGCACACAAGAAGAACTGGTC  
GACATGTTAGGATGTTGACTCATGAGATTAGAAGCACTCTTGATAGACACACAATATTGAA  
AACGACTCTTGTTGAACTGGGTAGAAGTTTTGGCACTAGAGGAATGTGCGTTATGGATGCCA  
ACACGAACTGGTTTGGAGCTTCAACTCTTTACACATTGCGACAGCAGAACCAGTTGGAT  
ACACAGTACCCATTATCTTCTGTTATCAATCAAGTATTTAGTAGCAACAGGGCAGTAAA  
AATTTACCTAATTGTCCAGTTGCTAGATTACGACCTTATGCTGGAAAATACATGCCTGGG  
GCAGTAGTAGCTGTTTCGAGTTCCCTCTCCTACATCTTTCTAATTTCCAAATATATGATTGGCC  
TGAGGTTTTCGACAAGAAGTTATGCTTTGATGGTTTTGATGCTTCCATCAGATAGTGCTAGG  
CAATGGCATGTGCATGAGTTAGAAGTGGTTGAGGTAGTCGCTGACCAGGTAGCTGTTGCT  
CTTTCACATGCTGCAATCTTAGAAGAGTCAATGAGGGCAAGGGATCAGCTCATGGAGCAG  
AATGTTGCATTGGATCTAGCAAGAAGAGAAGCAGAACTGCAATTCGTGCTCGTAATGAC  
TTTTTGGCTGTTATGAACCACGAGATGAGAAGTCCCATGCATGCAGTTATTGCACTCTCTTC  
ATTACTACAGGAAACAGATTTGACGGCTGAGCAACGTCTGATGGTGGAGACAATATTGAA  
AAGCAGCAATTTGTTGGCTACCCTCATCAATGACGTTTTTGGATCTTTCACGGCTGAAGAT  
GGCAGTCTTCAACTTGAAGCAACAACATTTAACCTCCATTCTTGTTCAGAGAGGTCTTA  
ACTTGATTAAGCCTGTTGCATCTGTTAAAAAGTTATCACTCACTTACATATAGCCTCAGAT  
TTGCCAATGTATGCCATTGGTGATGAAAACGTCTCATGCAAATATTCTGAATGTTGTTG  
GTAATGCTGTGAAGTTCTCAAAGAGGGGCTGCATTTCCATCTCTGCTTTCGTTGCAAAGCC  
TGAATCCTTTAGAGATGCTAGAATTCCTGACTTTCTTCCAGTGCTAAGTGATAACCACTTTT  
ATTTGCGAGTACAGGTAAGATTTCAGGATCAGGAATTAATCCACAAGATATCCCAAAGAT  
ATTCATAAGTTTGCACAAAACCAATCGTTAACAACAAGAAATCCTGCTGGAAGTGGACTT  
GGCCTGGCAATTTGTAGGAGGTTTGAATCTTATGGAAGGACATATTTGGGTTGAAAGCG  
AAGGTATTGGTAAAGGATGTACAGTCACTTTTATTGTAAGAACTTGAATCCCAGACCGATC  
AAATGAATTTAAGCTACCTTTTGTACCTAAAGTACCGGGAAATCATGGATCTACAACTTT  
GCTGGGCTCAAAGTTCTTGTACGGATGACAATGGGGTTAGCAGGACAGTAACAAAGGGA  
CTTCTTATGCATTTAGGATGTGATGTAACCACAGCAAGCTCAAGTGAAGAATGTCTGCGTG  
TTGTTTCTCTGGAACATGAAGTGGTCTTCATGGATGTTTGTGCAGGGTTAGATGGTTATGAA  
CTTGCAATCCGCATACATGAAAAGTTTACTAAACATCAAGATAGACCACTAATAGTTGCTC  
TACTGGAACACCAAAAAGGTAACAAAAGAAAAGTGTATGAGGGTTGGTATGGATGGCC  
TTATATTGAAACCTGTTTCTGTTGACAAAATGAGGGGTGTTTTATCAGAAGTATTGGAGCGC  
CGAGTTCTGTTGCAAACTGTTTAACTGTTAGATTGTTGTATATAGCTACATCAAATTTGGA  
GAAACACAACTTATGAAAACATGAGGCAATTGACATTAATTTTCATCCTTTTTGCTTTTAT  
GAGATCCCAGCGAAAGGAACAACGATTGAGTCTACGTTGTTAAATCATTTTTTATGAACAG  
AAGTTCGTATATGTTGTATATTCTGCATTTTTATAGCAGTCTTCAATGTTTTTCAATGGCGG  
T

>GmETR2 (Glyma12g37050.1)

GCAGAGATCTGTCTACATCATATTTGTTATGTGAAAAAGGAAAAATTGCCTGAGGTGGTTC  
AATCACTATGGAATCCTGCAATTGTATTGACCCACAAGTGCCAGCTGATGACTTATTGATG  
AAATACCAATATATCTCTGATTTCTTCAATTGCCCTTGCTTATTTCTCAATCCCTTTGGAGCTT  
ATCTACTTTGTTAAGAAATCAGCAGTATTTCCATATAGATGGGTCCTTGTTGAGTTTGGTGC  
TTTTATAGTTTTATGTGGAGCAACACATCTAATTAATTTATGGACCTTTAGAATTCATTCAAG  
AACTGTGGCTGTTGTAATGACCACTGCTAAGGTTTTAACTGCTGTGGTATCATGTGCAACT  
GCCCTCATGCTGGTACATATTATTCCTGATTTATTAAGTGTTAAAAGTATGGGAATTATTTTT  
GAAGAACAAGGCTGCAGAGCTTGATAGAGAAATGGGCCTGATTTCGCACACAAGAAGAAA  
CTGGTGCACATGTTAGGATGTTGACTCATGAGATTAGAAGCACTCTTGATAGACACACAAT  
ATTGAAAACGACTCTTGTTGAATTAGGTAGAAGTGGCACTAGAGGAATGTGCGTTATGG  
ATGCCAACACGAACTGGTTTGGAGCTTCAACTCTTACACATTGCGACAGCAGAACCCA  
GTTGGATACACAGTACCCATTATCTTCTGTTATCAATCAAGTATTTAGTAGCAACAGGG  
CAGTAAAAATTTACCTAATTGTCCAGTTGCTAGATTACGACCTTATGCTGGAAAATACAT  
GCCTGGGGCAGTAGTAGCTGTTTCGAGTTCTCTCCTACATCTTTCTAATTTCCAAATATATG  
ATTGGCCTGAGGTTTCAACAAGAAGTTATGCTTTGATGGTTTTGATGCTTCCATCAGATAGT  
GCTAGACAATGGCATGTGCACGAGTTAGAAGTGGTTGAGGTAGTTGCTGACCAGGTAGCT  
GTTGCTCTTTCACATGCTGCAATCTTAGAAGAGTCAATGAGGGCAAGGGATCAGCTCATCG  
AGCAGAATGTTGCATTAGATCTAGCAAGAAGAGAAGCAGAACTGCAATTCGTGCTCGTA

ATGACTTTTTGGCAGTTATGAACCATGAGATGAGAACTCCCATGCATGCAGTTATTGCACT  
CTCTTCATTACTACAGGAAACAGATTTGACAGCTGAGCAACGACTGATGGTGGAGACAAT  
ATTGAAAAGCAGCAATTTGTTGGCTACCCTCATCAATGACGTTTTGGATCTTTCACGGCTTG  
AAGATGGCAGTCTTCAACTTGAAGCAGCAACATTTAACCTCCATTCTTTGTTTCAGAGAGGT  
CCTTAACCTTGATTAAGCCTGTTGCATCTGTTAAAAAGTTATCACTCACTTCACATGTAGCCT  
CAGATTTGCCAATGTATGCCATTGGTGATGAAAAACGTCTCATGCAAACCTATTCTGAATGT  
TGTTGGTAATGCTGTGAAGTTCTCAAAGAGGGTTCATTCCATCACTGCTTTCGTTGCAA  
AGCCTGAATCCTTTAGAGATGCTAGAAATTCCTGACTTTCTTCCAGTGCCAAGTGATAACCA  
CTTTTATTTGCGAGTACAGGTAAAAGATTCAGGATCAGGAATTAATCCACAAGATATCCCG  
AAGTTATTCATAAGTTTGCACAAAACCAATCATTAAACAAGAAATCCTGCTGGAAGTGGAC  
TTGGCCTGGCAATTTGTAGGAGGTTCTGTAATCTTATGGAAGGGCATATTTGGGTTGAAAG  
CGAAGGTATTGGTAAAGGATGTACAGTCACTTTTATTGTA AAACTTGAATCCCAGACCGA  
TCAAATGAATTTAAGCTACCTTTTGTACCTAAAGTACCAGGAAATCATGGATCTACAACTT  
TGCTGGGCTCAAAGTTCTTGTGCATGGATGACAATGGGGTTAGCAGGACAGTAACAAAAGG  
ACTTCTTATGCATTTAGGATGTGATGTAACAACCTGCAAGCTCAAGTGAAGAATGTCTGCGT  
GTTGTTTCTCTGGAACATGAAGTGGTCTTCATGGATGTTTGTACAGGGTTAGATGGTTATGA  
ACTTGCAGTCCGTATACATGAGAAGTTTACGAAGCATCAAGATAGACCACTGATAGTTGCT  
CTTACTGGAAACACCAAAAAGGTAACAAAAGAGAACTGTATGAGGGTTGGTATGGATGGC  
CTTATATTGAAACCTGTTTCTGTTGACAAAATGAGGGGTGTTTTATCAGA ACTATTGGAGCG  
CCGAGTTCTGTTGCAAAGTGTTTAACCTGTTAGATTGTTGTACATAGCTATATCAAATTTGG  
AGAAGAGCACAACTTATGAAGCAATGAGGCAATTGACATTAGTTGTCATCCTTTTTGCTG  
TTTTGAGATCCCGCAAAGGAACAACGATTGAGTCTGCGTTGTTAAATAATTTTTTGTGA  
ACACAAGTTCGTATATGTTGTGATTCTGCATTTTATAGCAGACTTTCGATGTTTTGCAATG  
GCGGTA AAATTGCATTTATACTGTCCTAGACTGTTTTGATTAATTGATTTAAGTTTAATTACT  
TGTTAGATCTCTATACCTGTATAGTCTTTGTTTTAGTCTCTACATTCAA AATATTTGGTTAG  
CCCCTACGCATATGTACCTCCGTTCCCTATGGATAAGAC

>GmHP01 (Glyma15g10660.1)  
MDVGQMQRQWIDYTKSLFLEGFLDGQFLQLQQLQDENNPDFVVEVVSLFFEDSERLLKDLTFA  
LDQNGVDFKKVDAHVVHQLKGSSSSIGAQRVKNACIAFRNFCEEQNTDACVRCLQQVKQEYCL  
VKNKLETMRLEQQIVAAGGSIPTELSFSG\*

>GmHP02 (Glyma13g28390.1)  
MDVGQMQRQWIDYTKSLFLEGFLDGQFLQLQQLQDENNPDFVVEVVSLFFEDSERLLKDLTFA  
LDQNGVDFKKVDAHVVHQLKGSSSSIGAQRVKNACIAFRNFCEEQNTDACLRCLQQVKQEYCV  
KNKLETMRLEQQIVAAGGSIPTELSFIG\*

>GmHP03 (Glyma07g38310.1)  
MEVDQMQRRECLDYTKSLFLEKGFLLDGQFLQLQQLQDENNPDFVVEVVSLFFEDSERLLNDLTF  
ALNQKSIDFKKVDAAHVHQLKGSSSSIGAQRVKNCCISFRNFCEEQNIDACLSCCLQQVRQEYCH  
VKNKFETLIRLEQQIVAAGGSIPMMEFSF\*

>GmHP04 (Glyma10g29890.1)  
MDGIVQLQRQLVDYASLFEHGFLLDQFNQLQQLQDESNDPFDVVEVVTLFFEDAERLLNELTK  
TLGQPSIDFKRLDAHVVHQLKGSSSSIGAQRIRVVCISFRNSCEEQNVEGCLKNLQQVKQEYSLV  
KSKLETFRMEQQILAAGG\*

>GmHP05 (Glyma20g37450.1)  
MDGIVQLERQLVDYASLFEHGFLLDQFNQLQQLQDESNDPFDVVEVVTLFFEDADRLLNELTK  
ALGQPSIDFKRLDAHVVHQLKGSSSSIGAQRIRVVCISFRNTCEEQNVEGCLKNLQQVKHEYSLV  
KSKLETFRMEQQILAAGGSVSR\*

>GmHP06 (Glyma19g33420.1)  
MDGFLDDQFNQLQKLQDESSPYFVMEVMTMFFGDSEKLLNRIALALEQKPVDFKSVDSNVHQ  
FKGSSASVGVARVKDVCTNFRNICEAQNLEGRLYPEINFEVNTENATSTKYFLNWSGDLIFFIFS  
EFVI\*

>GmHP07 (Glyma07g01840.1)  
MDRNQSRQVAAMKQSLFDQGFLLDEQFIQLEELQDDANPNFVEEIVTLHYRDSSRLISSIEQAL  
KERNPLDFNKLDLTMHQFKGSSSSIGAKKVKAECLNFRFYCRGNAEGCMRSFQQLKREYAA  
LRKKLEAYFQLARQAGP\*

>GmHP08 (Glyma08g21510.1)  
MDRNQSRQVAAMKQSLFDQGLLDEQFIQLEELQDDANPNFVEEIVTLHYRDSSRLISSIEQAL  
KERNPLDFNKLDLTMHQFKGSSSSIGAKKVKTECNLFREYCRAGNAEGCMRSFQQLKREYAA  
LRKKLEAYFQVTRQ\*

>GmHP09 (Glyma02g16980.1)  
MTMDVAQLQRKLRHQAAMFQQGFLDDQFSQLQKLQDESTPDFVIEVITMFFDDSENLLKNM  
ARCLEQVPADFKQIDAAHAHQYKGSSASIGAARVKNVCATFRAFCEAKNQEGCMRCLSLLQQA  
YSLKKNALQYLFSLQQQIKAAGGSIPTQ\*

>GmHP10 (Glyma10g02820.1)  
MTMDVVQLQRKLRHQAAMFQQGFLDDQFSQLQKLQDESTPDFVIEVITMFFDDSENLLKNM  
ARCLEQVPVDFKQIDAAHAHQYKGSSASIGAARVKNVCATFRAFCEAKNLEGCMRCLSLLQQA  
YSLKKNALQYLFNLQQQIKAAGGSIPTQ\*

>GmPHP01 (Glyma07g03390.1)  
MLGLGADLLWADMNRLAFLFHQGVLDQFLQLQQLQDETSNPNFVSEVVNIYFHESEKLLRNL  
RALLMEKEFSDYKKMGIHLNQFVGSSSSIGAKRVRNVCVAFRAATEQNNRAGCLRLEMELH  
EYCYLKNKLHELFIQEQRALAAGVRYVPVQN\*

>GmPHP02 (Glyma08g22720.1)

MLGLGADLLWADMNRLAFLFHQGVLDLQFLQLQQLQDEETSPNFVSEVVNIYFHESEKLLRNL  
RALLMEKEFSDYKMKGIHLNQFMGSSSSSIGAKRVRNVCAAFRAATEQNNRAGCLRALEMLEH  
EYCYLKNKLHELFIQEQQRALAAGVRYPVQN\*

>GmPHP03 (Glyma15g01010.1)

MLGFGADLLWADMNRLAFLFHQGVLDLQFLQLQQLQDEASPINFVSEVVNIYFHESEKLLTNL  
RGLLMEREYKMKGIHLNQFMGSSSSSIGAKRVTNVCAAFRAATDQSNRAGCLRALEMLEHEYC  
YLKNKLHELFIQEQQRALVAGVRYPVQN\*

### cDNAs

>GmHP01 (Glyma15g10660.1)

GTCCGTAATAGTGCAAGAAAAATAATTTGCTTCTCTCTGTCTTTCTCACAAAGACAACAGA  
GGAACACTCCCAAACAACCATGGACGTGGGTCAGATGCAGAGACAGTGGATCGACTAC  
ACCAAATCCCTCTTCCCTCGAGGGCTTCTGGATGGTCAGTTTCTGCAACTTCAGCAGCTT  
AGGATGAGAACAACCTGACTTTGTGGTCAAGTTGTCTCTCTCTTTGAAGATTCTGA  
AAGGCTTCTCAAAGATCTCACCTTGGCCTAGATCAGAATGGCGTTGACTTCAAAAAAGTT  
GATGCTCATGTGCACCAGTTAAAGGGTAGCAGTTCAAGCATAGGTGCACAAAGGGTGA  
AATGCCTGCATTGCTTCCGCAACTTCTGTGAGGAGCAGAACACAGATGCGTGCCTCAGA  
TGTCTGCAACAAGTAAACAAGAGTACTGCCTTGTCAAGAATAAGCTTGAACAATGTTCA  
GGCTTGAGCAACAGATTGTGGCAGCTGGTGGTCAATCCCTACGGAAGTGGTTTCTCAGT  
GATGATGGGTGGGTTTGTAGAGATGCTTGTATTATGATCCTCTTCTTTGTTAAAGATTATCC  
TTTATCTTATTTAGTCCATGGTGAATGTATGGGTTTTTATGAAGATAGAAGTTTTCCATCCAA  
TGTACCTTTTTCTTCAACAAAAAGCTTTCATAATTTGTAATCTTTTGCATGCTTTACTGAAG  
GATGATAGTAGCACCATAATTGAACTTCTCTTTTATCTCTTCCAAACAAGGAAGAAA  
ATTAGTGGTGACAACACAATACAATCCTTTGAACACCAATACTCTAAATGAACATCTGAA  
TAATAAATGTACAACAATGATACATGTGAATACCATAGCATTATAAAAC

>GmHP02 (Glyma13g28390.1)

CACCACTATCTTCTTATGTTGTTTTGTATTGTGTGACAGACAACCTCAAAAAACCATGGACG  
TGGGTCAGATGCAGAGACAGTGGATCGACTACACCAATCCCTCTTCCCTTGAGGGCTTCC  
TGGATGGTCAGTTTCTGCAACTTCAGCAGCTTCAAGATGAGAACAACCTGACTTTGTGGT  
CGAAGTTGTCTCTCTTCTTTGAAGATTCTGAAAGGCTTCTCAAAGATCTCACCTTTGCC  
TAGATCAGAATGGTGTGACTTCAAAAAAGTTGATGCTCATGTGCACCAGTTAAAGGGTAG  
CAGTTCAAGCATAGGCGCGCAAGGGTGA AAAATGCCTGCATTGCTTCCGCAACTTCTG  
TGAGGAGCAGAACACAGATGCGTGCCTCAGATGTCTGCAACAAGTGAACAAGAGTACTG  
CATAGTCAAGAATAAGCTTGAACAATGTTCAAGGCTTGAGCAACAGATTGTGGCAGCTGG  
TGGATCAATCCCTACGGAAGTGGTTTCTTATTGAGTACTGAGAGGGTTTGTAGAGATGCTT  
GTATTATGATCCTCTTTGTTAAAGATTACCTTTATCTTATTAAGTCCATGGTGAATGTATGG  
GTTTTTATAAATAAGAGTTTTCCATCCAATGACTTTTTCTTCAACAAAAAGCTTTCATA  
ATTTGTAATCTTGAATGCTTTAATGAAGGATGATAGCACCATAATTGAACCTTCTCTT  
TATCTCTTCCAAACAAGGAAGAAAATTAGTGGTGACAACACAATACAATCCTTTCAACA  
CCAAATAGTCTAAATGAACATCTGAATTATGAATACCTTAGTTGGATAAACACTTATT

>GmHP03 (Glyma07g38310.1)

AAAACATGGAGGTGGATCAGATGCAGAGAGAGTGCTTGGACTACACCAATCCTTATTCT  
TGGAGAAGGGCTTCTTGGATGGTCAATTTCTTCAACTTCAGCAGCTACAGGATGAGAACAA  
CCCGGACTTTGTAGTTGAAGTGGTCTCTCTCTTCTTTGAAGATTCTGAGAGACTTCTCAATG  
ACCTTACCTTTGCTCTAAATCAGAAAAGTATTGACTTCAAAAAAGTTGATGCTCATGTTTAC  
CAGCTAAAGGGTAGCAGCTCAAGCATAGGTGCTCAGAGGGTAAAGAATTGTTGCATTTCT  
TTCCGCAACTTTTGTGAGGAACAGAACATAGACGCGTGCCTCAGTTGTCTGCAACAAGTAA  
GGCAAGAGTACTGCCATGTTAAGAATAAGTTTGAAGACTGATCAGGCTTGAGCAACAGA  
TCGTGGCAGCTGGTGGTCAATCCCAATGATGGAATTTAGTTTCTAAGGATGTGAATTTGT  
AGAGAAGGAAACAAGAGTATTTTGTGATCCACTTCATCTTTGGTGA AATTCTCTTTTATGT  
TTATGTCTCTGATGAATGTATGGATTTTATGAAGAGATAACTCAGATAAGTTTCCATCTAG  
TGTAACCCTTTTCAAAAAACAAAAAGCCTAATTTGTAATCTTTTGCATGCTTTAATGAACA  
CCAGATACCCTAGTTAAATTAACATACGTCACAAGTATGTTTGAAGAAAATAACCTTATT  
AAAACCCTTAAATTGATATAGACAAGTTAAAAATAGTTTCAACAATGGTAGTGGGAGGATA

AGGTTAGTGATTTTATAAGACTTGTGAGTGATTCTGTAGTCATTA CTTTCGTTAGACTTGATT  
GCACTGATGTAAGACCAGACCATGTAACTGTTTCGGTGGGGCTAGATCCAAGACTAGTG  
ACATTGTCGTCATTACGTGGAAATGTACCATAAGTCATTAGTTGGCATGAATTCATCGGTTA  
AAAAATATAGTGGTTGAAGATTATGCAGATATAAAGTCACTTTATTTTGAAGATGAAATT  
TGGGAGGGACAGCAGATAATTCTTTTAAATTCGTGTTCAAAGATAAGGGGAATCCGTA AAA  
GATATGATGCTTACAAATCAAATCAGTGTCCGGTGGTATTATCGGTGTATGACAAAGTGA  
CACCTAATGGAGGAATACATGATTTATTTATCCTTCTTAAAAAATCGCATTGCATATATGTA  
CTTAAATCAAGAGTATTGGTTAAGTTGATTTAAAAAATATATTTTATTA AAAATTA AAAAT  
AAATAGTATACTATTAAGAAGTAATTTTATAAACTATATTAGTATATTTCTTCACT

>GmHP04 (Glyma10g29890.1)

CACACTATAAACTAGGCAGAAGAAGAAATCAGTACCTAAAAAATATTGAGTGGCTGG  
TTAGA ACTTGAGACTAATAATGGATGGTATAGTTCAACTGCAGAGGCAACTTGTTGATTAT  
ACTGCTTCCCTATTTTCATGAGGGTTTTCTAGATGACCAATTTAACCAGCTTCAGCAACTTCA  
AGATGAAAGCAACCCAGATTTTGTGGTTGAAGTGGTGACTCTTTTTTTGAAGATGCGGAG  
AGGCTTCTTAATGAGCTCACAAAACACTAGGCCAGCCAAGCATTGATTTTAAAAGGTTGG  
ATGCTCATGTTACCAGTTGAAGGGTAGCAGCTCCAGCATTGGAGCACAGAGAATTCACA  
GAGTCTGCATTTCTTCCGAAACTCTTGTGAGGAGCAAACGTTGAAGGGTGTCTTAAAAA  
CTTGCAACAGGTGAAACAGGAGTATTCCTTGGTGAAAAGCAAGCTTGA AACTCTCTTCAG  
GATGGAGCAACAGATTTTGGCTGCAGGTGGGTAGTGTGATACGAGGCAGAGATATTTTGC  
AGCCATTGCAATTTGCAAACAACACTCCGAACAAATCATGTCCAATCTGCAAACAAGCA  
ACCCCACTTCTATGTTGTATTTAACTTTGTGTATGATTTTGTCCAGTGGATCATGGTTGTGA  
AATTGGATTTATCATTTAAGCCAGAGTTGGCCCATATTTAGTCCAAAAGCAATGTGAATAA  
CCCATGATCTCTAGCTGTTCAAATATTA ACTATCTTAATTTTGCCTATAAACTGTCTTCGA  
T

>GmHP05 (Glyma20g37450.1)

ACCTAAAAAATATTGAGTGGGTGGTTAGA ACTTGAGACTAATAATGGATGGTATAGTTCA  
GCTGGAGAGGCAACTTGTTGATTATACTGCTTCTCTATTTTCATGAGGGCTTTCTAGATGACC  
AATTTAACCAGCTTCAGCAACTTCAAGATGAAAGTAACCCAGATTTTGTGGTTGAAGTGGT  
GACTCTTTTTTTGAAGACGCGGATAGGCTTCTTAATGAGCTCACAAAAGCACTAGGCCAG  
CCAAGCATTGATTTTAAAAGGTTGGATGCTCATGTTACCAGTTGAAGGGTAGCAGCTCCA  
GCATTGGAGCTCAGAGAATTCACAGGGTCTGCATTTCTTCCGAAACACTTGCAGGAGC  
AAAACGTTGAAGGCTGCCTTAAAACTTGAACAAGTGA AACACGAGTATTCCTTGGTGA  
AAAGCAAGCTTGA AACTCTTTCAGGATGGAGCAACAGATTTTGGCCGCAGGTGGATCGG  
TTTCTAGGTAGTGTGATACGAGGCAGAGATGTTTTGCTGCCATTGTAATTTGGAACAACA  
CTCAGAACAAATCATGTCCAATCTGCAAACAACAACCCCACTTCTATCTTGTATTTTCA  
CTTTGTGTATGATTTTGTCCAGTGGATCAGGTCGTGAAATTGGATTTATCATTTAAGCCAGA  
GTTGGCCCATATTTAGTCCAAAAGCAATGTGAATAACCCATGATCTCTCAGCTGTTTAGAT  
ATTA ACTATCTTAATTTTGGC

>GmHP06 (Glyma19g33420.1)

ATGGATGGATTTCTGGATGATCAGTTCAATCAGCTTCAGAACTGCAAGATGAGAGTAGTC  
CATATTTTGTGATGGAGGTTATGACCATGTTCTTTGGTGATTCTGAGAACTTCTAAATAGA  
ATTGCACTAGCTCTAGAACA AAAACCTGTGGATTTCAAAGTGTAGATTCTAATGTCCATC  
AGTTCAAAGGAAGCAGTGCCAGTGTGGTGTGCGAGAGTTAAAGATGTCTGCACTAACTT  
CAGAAATATTTGCGAGGCTCAGAACCTGGAAGGGCGATTGTATCCAGAAATCAATTTTGA  
AGTAAACACTGAAAATGCTACAAGTACAAAATACTTCTTAAATTGGTCTGGTGATTTAATTT  
TTTTATCTTTTCAGAATTTGTCATTTAA

>GmHP07 (Glyma07g01840.1)

CTTCACTTTTACTTATAATGGACAGAAACCAATCCCGCAGGCAGGTTGCCGCAATGAAACA  
GTCCCTCTTTGATCAGGGGTTCTGGACGAACAGTTTATCCA ACTGGAAGAATTGCAGGAT  
GATGCAAATCCTAACTTTGTTGAGGAAATCGTGACTCTTCACTACCGTGATTTCGTCACGGC  
TTATCTCAAGCATAGAGCAGGCTCTCAAAGAGAGGAACCCCTCTGGATTTCAACAAGCTGG  
ACACACTTATGCATCAGTTCAAAGGAAGCAGTTCAAGCATAGGAGCCAAAAAGGTGAAAG  
CAGAGTGCAATCTGTTCAAGGAATATTGCAGGACAGGAAATGCAGAAGGATGCATGAGG  
AGCTTCCAACA ACTGAAGAGAGAATATGCTGCACTGAGAAAGAACTTGAAGCTTATTTTC  
AGTTGGCTAGGCAAGCTGGACCCTAGGAAACAGCATGTGCGCTCCAAATGAAGACTTGGAT  
GAAAATATGCATAATAGGGCAAATGTAATGTAATAGGTGAAATTTGTAGCATAAAAAAAA

TACTATATATATTCACCACAGGAAAGTGATGTTGCGCCCTTTTGAGATATTTTGTTCAAAAT  
ATCAGTTTTGTTTTTTAGATGTTATAGGAATATTACTCTTGCACTTTATGCTATATAATATA  
ATACATATAACCCTGCAATCCACGTATGGGCTTGTGT

>GmHP08 (Glyma08g21510.1)

CCCACCTCACCTCTTTTTCTCTCTTAACTTTTACTTATAATGGACAGAAACCAATCCCGCAG  
GCAGGTTGCTGCAATGAAACAGTCCCTCTTTGATCAGGGGTTACTTGATGAACAGTTTATC  
CAACTGGAAGAATTGCAGGATGATGCAAATCCTAACTTTGTTGAAGAAATTGTGACTCTTC  
ATTACCGTGATTTCGTCGCGGCTTATCTCAAGCATAGAGCAGGCTCTCAAAGAGAGGAACC  
CTCTGGATTTCAACAAGCTGGACACACTTATGCATCAGTTCAAAGGAAGCAGCTCAAGCAT  
AGGAGCCAAAAGGTGAAAACAGAGTGTAATCTGTTCAAGAGAATATTGCAGGGCAGGAA  
ATGCAGAAGGATGCATGAGGAGCTTCCAACAACCTGAAGAGAGAATATGCAGCACTGAGA  
AAGAACTTGAAGCTTATTTTCAGGTGACTAGACAATAG

>GmHP09 (Glyma02g16980.1)

AAGGGGTGTCGAGTTTTGAAGGAGAGAGAGAGACGCATTTGTAACGACAAGAAGCA  
GAAGGTGATGTAATACTGAGTGGTCAAATTAAGGATCGGGATTCAGGAATTTCCATTCTGA  
GCACACAGAAGAACAGAAAGAACTCCTTTTAATTTTCAATTTCAAGTCAAGATCGATCT  
GACATCATAGAAAATGACCATGGATGTCGCTCAGCTGCAGAGGAAGCTGCGCGAACACC  
AAGCCGCTATGTTTCAACAGGGTTTTTTGGATGATCAGTTCAGCCAGCTTCAGAACTGCA  
AGATGAGAGCACTCCAGATTTTGTGATTGAGGTTATCACTATGTTCTTTGATGATTCTGAGA  
ATCTCCTAAAAACATGGCACGTTGTCTAGAACAAGTGCCAGCTGATTTCAAACAAATAGA  
TGCTCATGCTCATCAGTACAAGGGAAGCAGTGCCAGTATTGGTGCTGCTAGAGTTAAAAAT  
GTGTGCGCCACCTTCAGAGCTTTTTGTGAGGCTAAGAACCAGGAAGGATGTATGAGATGT  
CTATCACAGTTGCAACAGGAGTACTCTACTGAAGAACGCTCTACAGTACTTATTCAGTC  
TGCAGCAACAAATCAAGGCTGCTGGTGGTTCCATTCCACACAATAGAGTAGATGAGTGA  
TAAAAAAGTGAAGCTTTTGTGAGGCTGCTGATTTTGTCTTTTTTTTATCTTTTCTGGATT  
ACTCGTTCAGAATTACGTCCAAGGTTTGAACGATGGATTATGGTGCTGATATGATGAATAA  
ACATTTCTTGCCTAGTTTGTGCGCATACATACATGATATTATATTATTCTTCTCCACTAACTG  
TTGTTAAGTTTGAAGTTTCCCATGTTTACTCGTTAGGGTGATAATGTTTATCGTTCACCTCATT  
TGTTAAAGTAAATGCGTATATTTGTAGTGTTAGCTCTTTGAACTCTTCTGTTCACTTCAAAG  
AATTTATTTGGAAGTGTTGGAATTAATAGCCCTTCAACTGT

>GmHP10 (Glyma10g02820.1)

GAAGGAGAGAGAGAGACATTTGTAACGACAAGAAGCAGAAGGTATAGAGGGAGTGGT  
CAAATTACGGATCAGGATTCAGGAATTTCCATTCTGAGACACACAGAAGCACAGAAAGAA  
ACTCCTTTTAATTTTCAATTTTCAAGTCAAGATCTGACATCATAGAAAATGACCATGGAT  
GTCGTTCACTGCAGAGGAAGCTGCGCGAACACCAAGCCGCTATGTTTCAACAGGGTTTT  
TTGGATGATCAGTTCAGCCAGCTTCAGAACTGCAAGATGAGAGCACTCCAGATTTTGTGA  
TTGAGGTTATCACTATGTTCTTTGATGATTCTGAGAATCTCCTCAAAAACATGGCACGTTGT  
CTAGAACAAGTGCCAGTTGATTTCAAACAATAGATGCTCATGCTCATCAGTACAAGGGA  
GCAGTGCCAGTATTGGTGCTGCCAGAGTTAAAAATGTGTGTGCCACCTTCAGAGCTTTTTG  
TGAGGCTAAGAACCTGGAAGGATGTATGAGATGTCTATCACAGTTACAACAGGAGTACTC  
TCTACTGAAGAACGCTCTACAGTACTTATTCAATCTGCAGCAACAAATCAAGGCTGCTGGT  
GGTCCATTCCACACAATAGAGTAGATGAATGATAAAAAAAGTGAACTTTTGTGGA  
GCAGCTGATTTTGTCTTTTTTATCCTTTTCTGGATTTTTTCGTTCAAGATTACGTCAAAGGTT  
TGAACAATGGGATTATAGTGCTGATATGATGAATAAGCATTCTTGCCTGGTTTGTACATA  
CATAAATTATGATTCTTTTCCAATAAAGTGTGTTAAGTTTAAAGGTTTCCCATGTTTACTC  
GTTAGGGAGATAATGTTTATCATTTCAGTCATTTGTTAAAAGAAAGTGCGTATATTATAATT  
ATAGTGTAGCTCTTGAAGTCTTCTGTTCAAGTTAAAGAATTATTTGAAAGTGTGGAATT  
CTTAGCTCTTGAAGT

>GmPHP01 (Glyma07g03390.1)

ATGCTTGGTTTGGGTGCGGACCTCTTGTGGGCCGACATGAACCGTCTCCTCGCCTTTCTCT  
TCCACCAGGGAGTGTGGATGAGCAATTCTTGAGCTTCAGCAGCTGCAGGATGAGACCT  
CCCCAACTTTCGTCTCCGAGGTTGTCAACATTTATTTCCACGAATCCGAAAAGCTTCTCAG  
AAATCTCAGAGCTTTGCTGATGGAGAAGGAGTTTTCTGACTATAAGAAAATGGGGATACAT  
TTGAATCAGTTCGTGGGTAGCAGCTCAAGTATTGGCGCCAAGAGAGTTAGAAATGTTTGC  
GTTGCCTTTCGTGCAGCTACTGAACAGAATAACCGTGCTGGTTGCTTGCAGCGTTGGAG

ATGCTGGAGCATGAATATTGCTATCTCAAGAACAATTGCACGAATTGTTCCAAATTGAAC  
AGCAACGTGCTTTGGCAGCAGGAGTAAGGTACCCGGTGCAGAATTA

>GmPHP02 (Glyma08g22720.1)

ATGCTTGGTTGGGTGCGGACCTCTTGTGGGCCGACATGAACCGTCTCCTCGCCTTTCTCT  
TCCACCAGGGAGTGTTGGATGAGCAATTCCTTGCAGCTTCAGCAGCTGCAGGATGAGACCT  
CCCCAACTTCGTCTCCGAGGTTGTCAACATTTATTTCCACGAATCCGAAAAGCTTCTCAG  
AAATCTCAGAGCTTTGCTGATGGAGAAGGAGTTTTCCGACTATAAGAAAATGGGGATCCA  
TTTGAATCAGTTCATGGGTAGCAGTTCAGTATTGGCGCCAAGAGAGTTAGAAAATGTTTGC  
GTTGCCTTTCGTGCCGCTACTGAACAGAATAACCGTGCTGGTTGCTTGCAGCGTTGGAG  
ATGCTGGAGCATGAATATTGCTATCTCAAGAACAATTGCACGAATTGTTCCAAATTGAAC  
AGCAACGTGCTTTGGCCGCAGGAGTAAGGTACCCGGTGCAGAATTAACAAAGCAATGCAA  
TGCAAGGAAATGAAATGATGATGAAAAAATATTTTTAGGATTTGTTTGTATTTTTGCTTTGT  
GTTCAATTTCTGGTTTCGTAAGGCTAAGGGCACGTATCTCCGTTATAGACAAGCCAAGCGA  
TACCCAGCTTTTGTGCTTTGTTGTGTAGGGAATAGAAAAAAGGGATCAACGCCTCTGGCTT  
TGTGATTCTCTAGTGTACTACGTAGTGCCATCATGCTCTTCTTACAGTATGCTTCGCTGT  
AACCTGTTCACTTTTTTTAACTAAAGTGGATCAAATCTATTAAGTTGGTGGTGTTCGA  
TT

>GmPHP03 (Glyma15g01010.1)

GCAATAGAAGCTGCAGGAACACATAACCCGATAGAAAGAAAGAACTTTAGGGGTGTGTG  
TGACATTATAAGTCTCCATTGTTCCCTCTTGTAAACGTTCTTGGCGTAATTAATTAGTACTAGT  
CGTTACCCTTATTAATAGAGTACGTACTACACTGCTAGCTCTGTTCAATTTGGTGTGGTTGCC  
TAATCTGAGTGTTAATCAGTTAGCCAAAACGGGTCTCCCTCTGTGGATGCTTGGTTTCGG  
TGCGGACCTCTTGTGGGCCGACATGAACCGTCTACTCGCCTTTCTTTCCACCAGGGAGTG  
TTGGATGAGCAATTTTTGCAGCTTCAACAGCTGCAAGATGAGGCCTCCCCTAACTTCGTCT  
CTGAGGTCGTCAACATTTATTTCCACGAGTCCGAGAAGCTACTACCAATCTCAGAGGATT  
GCTAATGGAAAGGGAGTACAAGAAAATGGGGATCCATTTGAATCAGTTCATGGGTAGCAG  
CTCAAGCATTGGTGCCAAGAGAGTCAAAACGTCTGTGCTGCCTTTCGTGCTGCTACTGAC  
CAGAGCAACCGTGCTGGATGCTTGCAGCGTTGGAGATGCTGGAGCATGAATATTGCTAT  
CTCAAGAACAATTGCATGAACTGTTCCAAATAGAGCAGCAACGTGCTTTGGTAGCAGGA  
GTGAGATACCCTGTGCAGAAATCAATAATGCAAATGAGACCGAATTGGTAGAATAAAGATC  
TCGATCGATGATTTGTTTTCCCTTTTCTTCTTCTTCTTCTCTCT



>GmRR1 (Glyma02g03140.1)

MDTDSFVSDHVSPEDESHEVHVLAVDDSLVDRKVIERLLKISACKVTAVDSGIRALQFLGLDEQ  
RRTSESDGFVPDLKVDLIITDYCMPMTGYELLKKIKESTMFREIPVIMSSSENILPRIDRCLEEG  
AEDFIVKPVKLSVVKRLKGYMTPKEVIKMRSDQDRRSDGYVNGGDDGGVLEINNKRKLEEQDTS  
DVLSLPPSTSTLSSSPSVSSPSSSPTSSASVLASPIRRLKMTSTD\*

>GmRR2 (Glyma17g10170.1)

MAITGDIFRQSITEMLAESPSGAPELHVLAVDDSLVDRKVIERLLKISSCKVTVVESGTRALQYL  
GLEGENGSLGFDSVKVNLIMTDYSMPGMTGYELLKKIKQESSVFREIPVIMSSSENVLTRIDRCL  
EEGAEDFLLKPVKLSVVRRLKDFIMKGKVKKEGKISHKMRSIDCSPPLTATCSLLSLPCDPSP  
SLLSPLSTKKARL\*

>GmRR3 (Glyma05g01730.1)

MAITGEIFRQSIKEMLEESPSGAPELQVLAVDDSLVDRKVIERLLRISSCKVTVVESGTRALQYL  
GLDGGNSSLGFDSVKVNLIMTDYSMPGMTGYELLKKIKQESSVFREIPVIMSSSENVLTRIDRCL  
EEGAEDFLLKPVKLSVVRRLKDFIMKGKVKKEGKISNKRMRSIDCSPPLTATCSPVSLPCDPPS  
SSSSSLLSPLSSKKARL\*

>GmRR4 (Glyma08g40330.1)

MDSNSVVSWPRLPENIDGFGIKQKQSEEVHVLAVDDSIIVDRKVIEHLLKVLACKVTAVDSEGLRA  
LQLLGLLDEQKIPSETNGFGGLKVDLIITDYCMPGMTGYELLKKIKESSFKETPVVIMSSENVL  
PRIDRCLEEGAEDFIVKPVKLSVVKRLKDFMTTKEVIRGELSQEEREGINKRKLDDTSDVSPSSP  
PSISSPLPSSPSSVIDSPIRRLKMTGTD\*

>GmRR5 (Glyma18g17330.1)

MDSNSVVSWPRLPENINGFGLKQSQSEEVHVLAVDDSTVDRKVIEHLLKVLACKVTAVDSEGLR  
ALQLLGLLDEQKIPSETNGFVGLKVDLIITDYCMPGMTGYELLKRIKESSTFKETPVVIMSSENVL  
PRIDRCLEEGAEDFIVKPVKLSVVKRLKDYMTTKEVIRGELSQEEREGINKRKLDDTSDVSPSSP  
PSISSPLPSSLSSVIDSPIRRLKMTNTD\*

>GmRR6 (Glyma15g37770.1)

MAMTVEAQFHVLAVDDSIIDRMLIERLLKTSSFHVTTVDSATKALKFLGLVEDELRTFDTTVASEI  
HQVDVINLIITDYCMPGMTGYDLLRKIKESKSLKNIPVIMSSSENVP SRINRCLEEGAEEFFLKPV  
QQADVNLKPLHMLKSRAKEEQDQPFNKRKDMEEIHSPNKTRIKCSS\*

>GmRR7 (Glyma04g42680.1)

MEFVDTRKLQLQHQQLQQQPQHVFHVLAVDDSVDRKLLERLLRGSSCKVTCVDSGDKALKY  
LGLIDELDDTSSTLESESSHPPQPLQREGIKVNLIMTDYCMGMSGYDLLKRVKGSSWKDV  
PVVIMSSENVSPSRISMCL EEGAEFFLLKPLQLSDLDKLQPYFLKSLDNSCEKESANSSIDSDND  
NVINNSNNSNSNNNNNSISKRKAMSPEPHREERSRPKMKELAVV\*

>GmRR8 (Glyma06g12100.1)

MEFLDTRKLQLQHQQLQQQPQHVFHVLAVDDSVDRKLLERLLRGSSCKVTCVDSGDKALKYL  
GLIDELDDTSSTLESESSHPPQPLQREGIKVNLIMTDYCMGMSGYDLLKRVKGSSWKDVP  
VVIMSSENVSPSRISMCL EEGAEFFLLKPLQLSDLDKLQPYFLKSLDNSCEKESANSSIDSDND  
VINNSNNSNNSNNNNNSISKRKAMSPEPHQEERSRPKMKELAVV\*

>GmRR9 (Glyma03g28570.1)

MGMAAAESQFHVLAVDDSIIDRKLIERLLRTSSYQVTTVDSGSKALEFLGLRENDESNP SIPSVC  
PNNHQPQEVEVNLVITDYCMPGMTGYDLLKKIKESSLRNIPVIMSSENVSP SRINRCLEEGAEE  
FFLKPVRLSDLNKLPKPHMKTKFKDQKQETVERFEDSEVQQQQSQQQIIQNEHHQAPKLQVL  
QPESSESHQPPTIEQQQILQQANNNNK RKTMEQGLSPETDRTRPRYSGIATVV\*

>GmRR10 (Glyma19g31320.1)

MGMAAESQFHVLAVDDSLDRKLIERLLRTSSYEVTTVDSGSKALEFLGLCENDESNPSTPYVC  
PNNHQEVEVNLVITDYCMPGMTGYDLLKKIKESSLSRNIPVVIMSSENVPSRINRCLEEGAEFF  
LKPVRLSDLNKLPKMKTKLKDQKQGTVEKLEDLEVQQQQPQQQIIQNEQQQAPKSRDLLQ  
PESEHPHAQPTIEQQQQSLQQANNNSKRKTMEQGLSPETDRTRPRYSGIATVV\*

>GmRR11 (Glyma11g21650.1)

MGMAAEAQFHVLAVDDSLDRMLIERLLKTSSFHVTAVDGSKALKFLGLVEEKRNEEPPPCIA  
LESHQDVEVNLITDYCMPGMTGYDLLRKIKESKSLKDIPVVIMSSENVPARINRCLEEGADEFFL  
KPVQQSDVNLKLRPHLMKSKVKDGEDQQISNKRKETEESHSPDKTRTKMEPQKVVNFS\*

>GmRR12 (Glyma04g29250.1)

MGMAAEAQFHVLAVDDSLDRMLIERLLKTSSFHVTAALDMSGKALKFLGLVEDEQRNKEPPSIA  
LESHQDVEVNLITDYCMPGMTGYDLLKKIKESKSLKDIPVVIMSSENVPARINRCLEEGADEFFL  
KPVQQSDVNLKLRPHLLKSKVKDEEVQQINKKKEGNRRKPFTR\*

>GmRR13 (Glyma13g03560.1)

MELVNSQKLKQHEQQHFHVLVDDSVDRKLLERLLRDSSCKATFVDSGDKALKFLGLLDD  
LDNSSSTSSSELQNLGKIVNMIMTDYCMPSGMDLLKRIKGSWKDVPVVIMSSENVPSRISM  
CLEGGAEKFLKPLQSSDLEKLQPCFLKSSDNSSEQDQSAERSVASHDNDNYIDTIKALCPEH  
GFKLQFVSTIATTILRFWKS\*

>GmRR14 (Glyma06g19870.1)

MASAGDLFTHGLPEVGGAGKLHVLAVDDSHVDRKVIERLLKISSCKVTVVESGSRALQYLGLD  
GEKSSIGFDSVDVNLIMTDYSMPGMTGYELLKKIKESSVFREVPVVIMSSENILTRIDSCLEEGA  
EEFLLKPVKLSVVKRVTDVDFIMRGEGMKGVKRSKRSRSDDCIPSLSTAFASVSHPCDLSSPPS  
PCVSQSKKSRLSI\*

>GmRR15 (Glyma04g34820.1)

MASAGDVFRQGLPEVCAAGKLHVLAVDDSHVDRKVIERLLKISSCKVTVVESGSRALQYLGLD  
GEKSSIGLDSVKVNLIMTDYSMPGMTGYELLKKIKESSVFREVPVVIMSSENILTRIDSCLEEGA  
EEFLLKPVKLSVVKRVTDVDFIMRGEGMKGVKISKRSRSDDCIPSLSTAFSSVSHPCDISSPPSPC  
VLQPKKSRLSI\*

>GmRR16 (Glyma06g14750.1)

MAAGSSSNWVMESGDVPHVLAVDDNLIDRKLVEKLLRNSSCKVTTAENGPRALELLGLTSGG  
QNTMNGRSKVNMIITDYCMPGMTGYELLKKIKESSVTKEVPVVIMSSENIPTRINKCLEEGAQM  
FILKPLKQSDVKKLTQCLMN\*

>GmRR17 (Glyma04g40100.1)

MAASSSNWVMESGDVPHVLAVDDNLIDRKLVEKLLRNSSCKVTTAENGPRALELLGLTSGG  
QNNMNGRSKVNMIITDYCMPGMTGYELLKKIKESSVMKEVPVVIMSSENIPTRINKCLEEGAQM  
FILKPLKQSDVRKLTQCLMN\*

>GmRR18 (Glyma13g26770.1)

MAMTVEAQFHVLAVDDSIIDRMLIERLLKTSSFHVTTLD SATKALKFLGLVEDELRTFDTTVASEI  
HQDVDVNLITDYCMPGLTGYDLLRKIKESKSLKNIPVVIMSSENVPSRINRCLEEGAEFFLKPV  
QQADVNLKLPKMLKSRAKEEQDQPFNNKRKDMKEIHSPNKTRIKCSS\*

>GmRR19 (Glyma17g03380.1)

MNLSNGKGSMTLTASVVMKSGDAVSDQFPAGLRVLVDDDDPTCLMILEKMLRTCLYEVTKC  
NRAETALSLLRENKNGFDIVISDVHMPDMDGFKLLEHIGLEMDLPVIMMSADDGKSVVMKGV  
HGACDYLIKPVRIEALKNIWQHVVRRKNEWKDAEQSGSAEEGDRHPKASDEADYSSANEG  
SWRNSKKRRDEEEEAE DRDDTSTLKKPRVWVSVELHQFVA AVDQLGIDKAVPKILELMNV  
PGLTRENVAHLQKYRYLRLSGVSGHQNNLNSFLGPQEATFGTISSINGIDLQTLAVAGQL  
PAQSLATLQAAGLGRSTAKAGVPIPLMDQRNLFSEFNPRLRFEGEQPQHLSTSKPMNLLHGIP  
TNMEPKQLANLHQSTQSIGGLNMRVNASATQGNPILMQMAQSQPRGQMLSENTGPRVPRPLPS

SLGQPTVSNGISNGLLGRNGIAGNNRGPAYNPVPPSSSLLSFPMNQTSEMSVNNSSFPIGTTPI  
SSITTKGSFQEEVTSIGIKGSSGFPSYDIFNELHHQKSHDLEITNPGLTYNASHHVNPLQGNIDVA  
PSVLVHQGFSSTQQTGQSRDGLIGKAMFSMGEGLEQNNLQANFNPLLVDNSIRIKAERIPD  
ASSQTNLFPEHYGQEDLMTALLKQQEGMGAENEFDFDGYSLDNIPV\*

>GmRR20 (Glyma09g04470.1)

MNLSHGKGSTSSSPLKAGDTVSDQFPAGLRVLLVDDDDPTCLMILERMLRACLYEVTCKKRAEV  
ALSLLRENKNGFDIVLSDVHMPDMDGFKLLEHIGLEMDLPVIMMSADDGKQVVMKGVTHGAC  
DYLIKPVRIEALKNIWQHVVRRMRKNGLRDVEQSGSMEEGDRPPKGSDDGNYSVSSVNEAKSSK  
KRRDEDEEGDERDDSSTLKKPRVVWSVELHQQFMAVVNQLGIDKAVPKKILELMNVPLTRE  
NVASHLQKYRLYLRRLSGVSQQQGNLSNSFMSSQEATFGGTSINGIDLQTLAAGQFPSQSLA  
KFQAAGLGRRTAKAGMPMSLSDQKNLFSFENPRLRFEGESLQHLNSKPINLLHGILTNMEPK  
QLANLHQSTQPLGSLNMRVNSPATQNKPLMQMTQSQPRGQLLENASSHVTRYPSLVQPT  
VPNGISSGVLGNAIAGTSNITTTYNPVQQNSSLLSFPMNQTNEMSASNHLRSTPGITSIPNKGM  
FHEEGTSGVKGSGGFVQGYDMFNDLHHQKSHDWDLTNTGMTYDASQHANPLQGNIDVSPSV  
LVHQSFPSMQQTVQNRDTSIGKAMFSTGEGMHQSSSLQNIQHHNNLLLDNSVRVKAERIPDP  
SCQINNLFSDQYQGEDLVSAFLKQQEGVGTAEENEFDFDGYSLDNIPV\*

>GmRR21 (Glyma07g37220.1)

MNLSNGKGSMTLTAASVVMKSGDAVSDQFPAGLRVLLVDDDDPTCLMILEKMLRTCLYEVTCK  
NRAETALSLLRENKNGFDIVLSDVHMPDMDGFKLLEHIGLEMDLPVIMMSADDGKSVVMKGV  
HGACDYLIKPVRIEALKNIWQHVVRRKRKNEWKDAEQSGSAEEGDRQPKASDEADYSSSANEG  
SWRNSKKRRDEEEEEADRDDTSTLKKPRVVWSVELHQQFVAAVDQLGIDKAVPKKILELMNV  
PGLTRENVAASHLQKYRLYLRRLSGVSQHQNNMNSFLSPQEATFGTISSINGIDLQTLAVAGQL  
PAQSLATLQAAGLGRPTGKAGVPMLMDQRNLFSEFENPRLRFEGEQQHLSTSKPMNLLHGI  
PTNMEPKQLANLHQSTQSIGSLNMRVNASATQGSPLMQMAQSQPRGQMLSENIGPRVPRLP  
SSLGQPTVSNGISNGLLGRNGIAGNNRGPAYNPVPPSSSLLSFPMNQTSEMSVNNSSFPLGSTP  
GISSITTKGSFQEEVTSIGIKGSSGFPSYDIFNELHHQKPHDWEITNPNTYNASQHANPLQGNID  
VTPSVLVHQGFSSTQQTGQSRDAALIGKAMFSMGEGLEQNNFNQNASQNLNSLLLDNSIRVKA  
RIPDASSQTNLFPEHYGQEDLMSALLKQQEGMGPSENEFDFDFDGYSLDNIPV\*

>GmRR22 (Glyma15g15520.1)

MNLSNGKGSSTSSSPLKAGDSVSDQFPAGLRVLLVDDDDPTCLMILERMLRACLYEVTCKQRAE  
VALSLLRENKNGFDIVLSDVHMPDMDGFKLLEHIGLEMDLPVIMMSADDGKHVVMKGVTHGAC  
DYLIKPVRIEALKNIWQHVRKRKNGLRDVEQSGSVEEGDQPPKVSDDGDYSSVNEARSSK  
RRDEDEEGDEKDDSSSTLKKPRVVWSVELHQQFMAAVNQLGIDKAVPKKILELMNVPLTREN  
VASHLQKYRLYLRRLSGVSQQQGNLNSFMSSQEATFGGTSINGIDLQTLAAGQFPSQSLAK  
LQATGLGRRTAKAGVPMLPSDQKNLFSFENPRLRFEGESLQHLNSKPINLLHGIPTNMEPKQ  
LANLHQSTQPLGSLNMRVNAPVTQNNPLMQMAQSQPRGQMLGENAGSHVTRFPSSLVQPT  
VSNGISNGVLGNGIAGTSNITTTYNPVQQNSSLLSFPMNQTNEISVSNFPLRSSPGITSITNKGMFH  
EEGTSIGKGPFGFVQGYDMFNLHHQKSHDWDLTNTGMTYDAAHANPLQGNIDVSPSVLVH  
QSFPMTMQTVQNRDTSIGKAMFSTGEGMHQSNLQNVGQHNNLLLDNSVRVKAERIPDPSC  
QINNLFADQYQGEDLVSAFLKQQESIGTSENEFDFDFDGYSLDNIPV\*

>GmRR23 (Glyma11g37480.1)

MDNGCFSSPRRDFPAGLRVLLVDDDDPTWLKILEKMLKCKNYEVTTCCLARHALSLLRERKDG  
YDIVISDVNMPDMDGFKLLEHVLEMDLPVIMMSVDGETSRVMKGVQHGACDYLLKPIRMKEL  
RNIWQHVLKRRIHEAKEFEKLSDDGNLFAVEDVTSTKKRKDADNKHDDKECLDPSSTKKARV  
WSVDLHQKFVKAVNQIGFDKVGPKKILDLMNVPLTRENVAASHLQKYRLYLRSRIQKENDQRSS  
SSGLKHSDFPLKDMRSFGFQNSVNNQQQNDVAIDSYNHS DGSLLQNVETKSHEADPKGIVS  
QSTIAKKGRILTEENHAVFDCSMPTPYTWTEVPHMQLKEEHKSIVHLEDSFNQLPLHGKQQQHI  
QVDQSQSVASISSAPLITEEENDYANSVSSIGNAVGTFFPIQPGSLIMNVAFIWKFTKATFFWED  
LHFYWLQGEYNNMNFSLQNIGMSEYYDPGLISEAPTHLYDSADYSVIDQGLFIA\*

>GmRR24 (Glyma05g27670.1)

MDNGCFSSPRHDAFPAGLRVLVDDDDPTWLRILEKMLKKCLYEVTTCCLATEALKKLRERKDA  
YDIVISDVNMPDMDGFKLLEQVGLEMDLPVIMMSVDGETSRVMKGVQHGACDYLLKPIRMKEL  
RNIWQHVFRRMHEARDFESHEGDFDFEGIHLMRNGSDHSDDGNLFAVEEITSIKKRKDADNKH  
DDKEFGDHSPMKKARVVWSVDLHQKFVKAVNQIGFDKVGPKKILDLMNVPWLTRENVASHLQ  
KYRLYLSRLQKENDQKSSSSGIKHS DSPSKDPGSFSILDANKQQNDVAIDSFSYSDGSLLLQM  
DATSHEGNLKGIVSEPTTEKRRGSTGDIPDPKIQKSSQKSLNQPFTSVESSEANHAVFDCTIPTQ  
YSWSEFPKGPLKEEQKTLVQLEDLSQLPLHNGTQHIIHVDQSQSIASINSNPSITEEEVA  
AKLETKPLYAGYESDYVSPVSSIGSAVEVFPSSQSKSLMVNDQSSEPTFTSNLSLKAQGFNRDCISD  
LDFYQRNLLLGGEVASAPLEEDLNFFLLQTECYNMNFGLNIDMSEYYDPRLIAEVP SHFYDSA  
DYSSVDQSLFIA\*

>GmRR25 (Glyma08g10650.1)

MPNTLTTCCLATEALKKLRERKEAYDIVISDVNMPDMDGFKLLEQVGLEMDLPVIMMSVDGET  
SRVMKGVQHGACDYLLKPIRMKELRNIWQHVFRRMHEARDFESHEGDFDFEGIHLMRNGSDH  
SDDGNLFAVEEITSIKKRKDADNKHDDKEFGDHFPTKKARVVWSVDLHQKFVKAVNQIGFDK  
VGPCKILDLMNVPWLTRENVASHLQKYRLYLSRLQKENDQKSSSSGIKHS DSPSKDLGSFSFL  
NTANKQQNDIATDSFSYSDGTLIIQMDATSYEGDLKIVSEPTTEKRRASTSEIPDPKVQKSSQ  
KSLNKPFTSVESSEANHAVFDCTIPEYSWSEFPKGPLKEEQKTPVQLEDSLCQLPLHGTQHII  
QIDQSQSIASINSNPSITEEEVAAKLETKPLYAGYESDYVNPVSSIGSAVEAFRSQSKSLMVSDQ  
SSEPTFTSNLSLKTQGFNLDCISDLDFYQRNLLLGGEVASAPLEEDLNFFLLQSECYNMNFGLO  
NIDMSEYYDPRLTAEVPSHFYDSADYSSVDQSLFIA\*

>GmRR26 (Glyma04g06650.1)

MTVEKKRNDSGDEFPVGMRLAVDDDDPTCLLVKTLQRCQYHVTTTNQAIKALALLREHKDK  
FDLVIDSVHMPDMDGFKLLELVGLEMDLPVIMLSANGDTKMVMKGISHGACDYLLKPVMEEL  
KNIWQHVI RRKFKDSKEKNKTSNLDKPTSNSGNLGSSTGNSDQNEKLTKKRKDQDEDEDE  
DQENDLDNEDPSAQKPRVVWSVDLHRKFVA AVNQLGIDKAVPKKILDLMNVEKLTRENVAS  
HLQKYRLYLKRISCVANQQANMVAALGVADPSYLRMSSVSGVGHVQTLGSGGQLHNNNFRSF  
PPSGIINRLNTPAGLNVHGFPSGVLQLSQSNLNNANDHHKFQSVIVPNQNGVQGMTVSVGL  
DQLQNNKVVMSVQNLTTVFDKTTFPIPNKLPDPRPKITNSVSHTSVHFSNNALMLEPRPQGS  
QGSVRIGTLSSSVASQHFSLSLLDQGRYSDNWTSAVQPSVIQTNFFPPSECFRQTNIPPADN  
MASVPLQGGNLSGPSITSLSRQSHDSMTEMHSEGMTFTNRPGHTSSNVPFQGWDDHNQDAT  
HHSNIINLDFNYCDPLQMKHEGFVELTDETLKQHQGNTMDQQKSQENHFSNNLGSLEDLVSS  
MMK\*

>GmRR27 (Glyma17g33230.1)

MTVVENHTMDDL RDQFPIGMRLAVDDDDSTCLMVLETLLRRCQYHVTTTKNAIT ALNLLRENKT  
MFDLVIDSVHMPDMDGFKLLELVGLEMDLPVIMLSVND DPKMVMKGITHGACDYLLKPVRIEEL  
QNIWQHVI RRKFKDSKEQNKTSDYDKTNSDSGNRGRSAATGNSDQNGKPSKRRKDQDEDDDE  
ENDTDHNDPSTQKPRVVWSVELHRKFVSAVNLLGIDKAVPKKILDLMNDEKLTRENVASH  
LQKYRLYLKRISCVANRQANMVAALGTADSSYL RMGSLSGVGHVQTLTGPQQFHNNAFRPF  
PGGMIGRLNTSVGLNNHGLSSEALQLSHAQNLNNSINDPLKFQSSACGNQNAIQGMPMSIGL  
DQLQHNGKVS SVGPIQNMSP LIDARPTFAVSNRLSDQIPKVTMGCSPSPVLDVSNNAVLKA  
DSENTQGRGVYENLTSVASQHSQFSLPLLGHGRCSDIWSSPMRSGTNSYPPSETLQGGNLS  
GASSITSLSNQSHDSQTD MHSQGLIFTNNSGQISNNVPFLGWDDHNHDSYHSNVIGNSIDSLID  
PEGHTSINSTYNRNLDNFCDPLQMKHGDGIMGLSDENSLKQQRHYIMNQKSKSQRAPNNIGS  
LEDFVSSMMKQKQDKVKFLDGSYLCNNNYPDG TSM\*

>GmRR28 (Glyma14g13320.1)

MDDL RDQFPIGMRLAVDDDDSTCLMVLETLLRRCQYHVTTTKNAIT ALKLLRENKTMFDLVID  
VHMPDMDGFKLLELVGLEMDLPVIMLSVND DPKMVMKGITHGACDYLLKPVRIEELQNIWQHVI  
RRKKIDSKERNKTS DHDKPNADNGN RVSAGTGNSDQNGKPSKRRKDQDEDEEENEDGHD  
NEDSSTLKKPRVVWSVELHRKFVSAVNQLGIDKAVPKKILDLMNVEKLTRENVASHLQKYRLY  
LKRISCVANRQANLVAALGTADSSYL RMGSLSGVGHMQLTGPQQFHNNAFRPFPPGGMIGR  
LNASVGLNMHGSSSEALQLSHAQNLNKSINDPLKFQSAIACGNQNGIQGMPMSIGLDQLQHN  
KGVSVGPIQNMSSLIDDRPTFGVSKKLS DQTKV TIGCSPSPVLDISNNDLVLKADSENTQGGG

VYENLTSVASQHSQFSLPLLDHGRCSDIWSSPMQSSGTNSYPPSETLQGGNLSGQSSITSLFN  
QSHDSPTDMHSQGLIFTNNLGQMSNNVFPQGWDDNNHDSNYDANVIGNSIDTLIDPEGHTSINS  
NYNRNLDFNFCNPLQMKHDGIMGLSEENSLKQQYGYIMNRQKSQNSSATNNLGSLEDFASSM  
MKQATYSVWRAC\*

>GmRR29 (Glyma15g24770.1)

MAVEKQREDEGCDRFPVGMRLAVDDDPICLKVLENLLRKCQYHVTTTNQAVEALKMLREN  
NKFDLVIDVNMPDIDGFKLLELVGLEMDLPVIMLSAHGDTKLVKMGVTHGACDYLLKPVRIE  
LKNIWQHVVRRKNFDSRDQNKASNEEKAPNIAGEGSQGLRSENSADQNKRLGKKRKDQSEE  
EEEDGEENGDEDEDPSAQKKPRVWVSVELHRKFVAAVNQLGLDKAVPKKILDMNVEGLTREN  
VASHLQKYRLYLKKAQQANMVAALGGSDSYLRMGSDIGYGDFTSSGSGRITNTTSPSYAST  
GIFSRNLNSPAALNMRAISSALIRPVQSQNINCSLNTLGNIQPSVFPANHSSSLLQGIPTSIELNQ  
SKQSNCTTGISQLSQVDSSGFVAVSGFPDSRATVNGPNNSLPCVSNNHIMLQGNPQQMHGPG  
AFRNQSSVRAASLCAESFDAGLCSSSNLLDYNRCNENWQNAQAQLSKFPAHSLPLCEAFSNDQ  
LPTRINVSNSRTHIVNSPVDSSRMGISVPLEDTRNELACQEGLIGNIVKPSSYTPQQRWEEHK  
LDYNQNVGHSFNPNVNSHASSSGVKSSMGHGLNQNTTICSNRVDASLVGQLNGASPSISRCTE  
VEKFSSDIRLKPNEAYILEQMKSQDGFQMNTFGTLDDIMGAMVKREQNELTLLDGEMGFDAYP  
VGSCN\*

>GmRR30 (Glyma09g14650.1)

MAVENQREDGGCDRFPVGMRLAVDDDPICLKVLENLLRKCQYHVTTTNQAVEALTMLREN  
NKFDLVIDVNMPDIDGFKLLELVGLEMDLPVIMLSAHGDTKLVKMGVTHGACDYLLKPVRIE  
LKNIWQHVVRRKNFDSRDQNKASNEEKAPNFAGGGSQGLRSENSADQNKRLGKKRKDQSD  
EEEGGEENEDDEDPSAQKKARVWVSVELHRKFVAAVNQLGLDKAVPKKILDMNVEGLTREN  
VASHLQKYRLYLKKAQQANMVAALGGSDSYLRIGSIDGYGDFTSSGSGRITNATLPSYAST  
GIFSRNLNSPAALNMRGISSALIRPVQSQNINSSLNTLGNIQPSIFPANQSSSLLQGIPTSIELNQS  
KQRNCTTGISQLSQVDSSGFTVAVSGFPDRATVNGPNNSLPCVSNNHIMLQGNPQTHGPGAF  
SNQSSVRAASLCAESFDVGLCGSSNLLDHNRCNDNWQNAQAQLSKFPANSLPLCEAFSNDQLP  
PTSINDSNSSTHIGNNSPVDSSRMGISVPLEDTRNELRCQEGLIGNIVQPSYTPRQRWEEHKL  
DYNQNMSCPFSVNSHASSSGVTSSMGHVLNQNTTICSNRVDASLVGQLNGASPSISRCTE  
EKFSSDIRLKPNEAYILEQMKSQDGFQMNTFGTLDDIMGVMVKREQNESTLLDGEMGFDAYPV  
GSCN\*

>GmRR31 (Glyma06g06730.1)

MTVEKKMNDSGDEFPVGMRLAVDDDPICLKVLENLLRRCQYHATTTNQAIAKALALLREHKDK  
FDLVIDVHMPDMDGFKLLELVGLEMDLPVIMLSANGDTKLVKMGISHGACDYLLKPVMEEL  
KNIWQHVIIRKKFDSKEKNKTRNIDKPTSNSNGLGSSGTGNSDHNEKLTKKRKDQDEDEDEE  
QENDHDNDPSAQKKPRVWVSVELHRKFVAAVNQLGIDKAVPKKILDMNVEKLTRENKYRL  
YLKRISCVANQQTNMVAALGGADPSYLRMNSVSGVGHISGISGQLHNNAFRSFPSPGIINRL  
NTPAGLNVHGFPSGVLQLSQSNLKNNTNDNLKFQSAIVPANQNGVHGMTVSVGLDQLQNNKG  
VMSVQNLTTVDAKTTFPISNKLPPRPKITNSGSHTPDVSFSNNALMLEPRPQGTQGSVRIET  
LSSSVASQHSEFSLSLLDQGRYSDNWASTVQPSVIQTNSYPPSECFGQTNIPPTDNMASVPLQ  
GGNLSGASITSLSRQSYDSMTDMHSEGVFTNRPGHISSNVQYQGWHDNNQDATHHSNLSIN  
SLTPVNGAAVPAGHAAMNSALHRNLDFNYCDPLQMKHEGFVELTDEALSKQHQQGNIMNLPKS  
QQSHFSNNLGSLEDLVSSMMKQENDKMKLLDGNLICNNYSGGLSRCDSRFSSTFQNMHPR\*

>GmRR32 (Glyma13g22320.1)

MVVGDRFPVGMRLAVDDDKTCLTVLENLLRKCQYNVTTTNQAIAKALEMLRKNRNKFDLVID  
VNMPDMDGFKLLELVGLEMDLPVIMLSGYGDKERVMRGVIQGACDYLTGPVRIEELQNIWQH  
LRRRIDSKDKNKTASEGKGCMSMAGKKESEDEEEYDKENEEHSNQQKPRLVWDAELHRKF  
LAAVNHLGIDKAFPKRILDMNVEGLTRENVASHLQKYRLGLRKPTQQPSMVAALGSSDPYLQ  
MDSVEGFRTLSGSVGLSTTLPSYASGGVFCRLNPPSGLRGVNSALFQPVLSQNNMSAKAF  
GNMQLSMFSANQTSLLQGIPTSIDANKFQQNRSPGIRKLSPLDDSSGFKVSSGFSSTRATVIN  
PNNFVHDLNHNHLLQRNSPPAQNSGAFRNHSSLGAASVNTQSFDPGICELDHNHRNKSQWQ  
TTQISKFPTNTSAVSKVFTHDQLAQNNLKFSSSTFCSGNSPVDFSSTRAIAPPLEDARDKRCN

KDMSQTFNSTKSVSPNGDTSSLGHSLDQNNVSSEGIGASLVNPSITQSNEGEKFYSMKSNDACILRSMESQEGLMQNTFGSLNDIMSEITEQEQNTIMLMDGELEFDLDHAFDSF\*

>GmRR33 (Glyma07g26890.1)

MAPAAAEFPVGLRVLVDDDDATTLKIIEQMSIRCRYRVTTCATEATVALNLLRERKGCDFVVLSDVHMPDMDGYKLEHVGLEMDLPVIMMSGDSTTSAVMKGIRHGACDYLIKPVREEELRNIWQHVRKFWNDSKEQDNSSGSMEDSDQNKRGNDDAEYTSVADAAVVKAPKKRSSLKEEDIELESDDPAASKKPRVVWSVELHQQFVSAVNQLGLDKAVPKRILELMNVPGLTRENVAHLQKFRLYLKRLTGVAQQQNGMLNTPGPIESNLGTNGRFDVQALAAAGHVPPETLAAIHAELLGHPTNNIMSTVDQTTLLQASIQGLKSHSHAGHAVAYGQPLVKCPSNIGKNFSPSILTVNDTSSGYGAWLSSNNTIGLVRPNNsvervGIQNNMLILEHQQRQQPQQKQQQQQQKQQQLQQQSLIHDRSCSINVQPSCLVVPSQSSETFQAINSPASVNQDCSFAWNAIIDYSLLPQKSNNFSASQFPGGDTKARGVLYGYTTPSSCSTSSSNGNIQQLQNSTLTFGAARPLPSLLPMTDRKDPYGFKSGDLLDQVCFRNLGFVKGKDCIPSRFVENEIESSVSDFTQMKNVNDISGNRQKEEPNIPKVSHPIIERYPSRDHSSVFAE\*

>GmRR34 (Glyma03g32720.1)

MAHQNLGTKLTALVVDDNKINRKHQKLLSVGMKNQGVENGQEAVDIHCHGQRFDLILMDMDMPIMNGIEATKELRSMGIGSMIVGVSSRCTEAERKFMEAGLNDYHEKPLNNSKLSSLLDKINPSFTRN\*

>GmRR35 (Glyma19g35470.1)

MTIYSTERFIKLLSVGVKNQGVENGQEAVDIHCHGQIFDLILMDMDMPIMNGIEATKELRSMGIGSMIVGVSSRCTEAERKFMEAGLNDYHEKPLNNAKLSSILDKINPSFTRN\*

>GmRR36 (Glyma19g35480.1)

MEPRQLTALIVEDDMVIRMVHQKILNSVGLKIQVAENGKEAIEIHGSGQSFIDLILMDRDMPVMNGIEATKTLRSMGINSMITGVSTRSVAAHIREFMEAGLDDYVEKP\*

>GmPRR37 (Glyma04g33110.1)

MESGDEINLNIESGNGKSGGDFVDRSKVRILLCDNDSKSSQEVFTLLLRCSYQVTSVKSARQVIDALNAEGQHIDIILAEIDLPMKKGMLKYIAQDKEFRIPVIMMSAQDEVSVVVKCLRLGADYLVKPLRTNELLNLWTHMWRRRRMLGLVEKNILNYDFDLVVSDPSDANTNSTTLFSDDTDDKSKRSTNPEVGVISVQQEQEVNVTINVIGLHVEYEEKWWWVSSSTLIQRGSTIAIAAAVEEPPDAHASECGPDVDGVNDHQTAFHSSGPKKSELRIGESSAFFTYVKASILKSNLEGGVNVDKNGATHVRMEVMHQTCAQGGVNDLQIRENGEAYESQSQDDLPSSTSIPDSLIERSTPPASMEVSQQKHREENLHQGMHPRNGTHCSELEVSGMASQQVYPYISGVVNHVMMPSSAQISAMISQYSHLPQGGPHGTGMTSFPYYPMSICLQPGQIPNPHSWQSFNGSSSSEAKLSKVDRREAALMKFRQKRKERCDFDKIRYVNRKRLAERRPRVRGQFVRKLGANADLNGQPASIDYDEDEDEDDQGAR DSSPEDA\*

>GmPRR38 (Glyma05g00880.1)

MKLLKYIARDKELCRIPVIMMSAQDEVSIVVKCLRLGAADYLVKPLRTNELLNLWTHMWRRRRMLGLVENNITYDFDLVASDPSDANTNSTTLFSDDTDDKSKRSTNPETGVSIQQEQEASIAIAAVVELPNALLSEYQPDVPGISDRRTVAATPRQHPSSTRTNDGHFLSGPKKSELKIGESSAFFTYVKATTLKRNVESAHVDNTTTTEVRVEDMNQACTEQGGNDLKTENEEMFENHSQDDLPSNSIPDSFSIERSTPPASTEGVVHPRNGSHGSGPAQHAYPYISGVVNHVMMPSSAQLHAGSSMI AQYNHLPQCPHANGMTSFPYYPMSICLQPGQISTNSWPSLGSSSSCEVKISKVDRREAALVKFRQKRKERCDFDKIRYVNRKRLAERRPRVRGQFVRKLNGINVDLNGQPASTDYDEDEDEEEDNHGARDSSPEDA\*

>GmPRR39 (Glyma06g14150.1)

MWATSSKCLDIFPNQDIFGSRWIRGLTLVSHPTFPDPPAVKLNKSGFGLVPQQILNSDAIVPFHARGGDDGGSGSKGGAHLKGFMRWEKFLPKMILRVLLVEADDSTRQIIAALLRKCSYKVAAPVDGLKAWELLKGRPHNVDLILTEVDLPSVSGYALLTLIMEHEICKNIPVIMMSSQDSISTVYKCLRGAADYLVKPIRKNELRNLWQHVVRRQSVGLLFIHFSSTTINGPQDESVAQQKVEATAEN

NAASNRSSGDAACIQRMELIEKGSQAQSSCTKPDCEAESGPVDNIDNIQEFSPKCGEAYPR  
LNVSICKNGEASTTDADPEHFGNGISGEAHDNHVYQMNSSKEAIDFIGAFHHTPICTLKNSTVNC  
TGKFDLSPQLDLSLRRSRPSSFENELTEERHTLMHSNASAFKRYTNRQLQISTPAVLINFSDDQ  
RQQIANCKNISRIATGCNSDSSTPSMQRQIVSPTTVQSKEPELATSHSQPGHSLPIPVKGVFRN  
DLCTTYGVSFVPSVFRAQSGSPAMPSPNSVMLLEPNFQVNAFYQSNMKESSEQLYEPGGPNG  
NTTQNHIVYTQEHSENAEDQGHISPTTDQSVSSSFCNGNASHLNSIGYGSNCGSSSNVDQVN  
TVWAASEGKHKDLTSNANSHRSIQREAALNKFRKLRKERCYKVKRYESRKKLAEQRPRVKG  
QFVRQVHPDPLVAEKDCKEYDHSISDTLERRA\*

>GmPRR40 (Glyma19g44970.1)

MGRVSRGRTGHVWTEWNESEIHIHIYLPSEDILLDFRGSAAAAADCLRMGEVPAVMQATQG  
EQSNNASAVHWERFLPRMVLRLVLLVEADDSTRQIIAALLRKCGYKVVAFCDGLKAWETLKNK  
AFDLDLILTEVDLPSISGFSLTLIMEHDICKNIPVIMMSSHDSVSMVFKCMLKGAADFLIKPVRK  
NELRNLWQHVVRRHAISRPPQNLTLPEIELGFAAENHAASNDSSGSVASTPKDDECSEKTSEA  
HSTCPSPFLEAESTYEMMQDILQLKSSSNLSDIDTVKHENSTKERCESDKHNDEAGEKSLFIL  
EDARCNTKTFKPTGLRLGQSYECHETRNQDEVLRIELIKSNPEINTDIHRCSDDELVDPSTGAILIA  
TFKNLPKSTDEKCSFSSGNTAKFDFDTQLELSLRRDFPGSSCKAAFKERQILNHSNASAFSRY  
SNSKLLQPLFPTSTISAKLTNASQNSHESLKLKSKNTSTSHQYSEKSNQEEKIITSVIGQSGQV  
DPKLPNSQLGLFPATGVTSDHKSKGNGNVFPSKLYAKSGVHPISTPKSVCQKESPFPSTSS  
QSNPQSHNSERHHWLEDATHASDQNVNDQSNLECEHDSPAASQSAGPSFFHDTANHNSG  
VYRSDGNATSAKVAKESHEIFIDSGQRSYDGFITDSDHRTSQREAALTKFRLKRKDRCYEKKV  
RYQSRKRLAEQRPRVKGQFVRQVHDDHPVADVGGGS\*

>GmPRR41 (Glyma13g19870.1)

MPGLSGIGLLYKIMGHKTRKNIPVMMSSHDSMGLVFKCLSKGAVDFLVKPIRKNELKNLWQH  
VWRRCHSSSGSGSESGTQTQKSVKSKSLEKFDNNSGNGEDDNGSIGLNNGDGSNDNGSGTQ  
SSWTKHAVEVDSPKPVSHWDKIAECPDSTCAQVVSNAEIGENKVVPLAAKECPEQKEQLGS  
KHSNAPDVGPSKFNDQINRGQLDLNCENQSSKLSTSDSQMHSGGFEALYKKPKSSDIENKDT  
NNDEELPSLELSLKRRLRGVEDAGIAIQDDRNVLRRSDQSAFSRYNAALNPKSPTGCVGSNSP  
HNNSLEVTKKDSHDIQSHSSGNPPNQNNSGASNNIDMGSTTNNAYAKSAVISEPAVASTTKY  
TTATMLAPPKLDHRKDSAAPDFHLHCENHNCIADNMKHQLPPDHAESIKKMATAAPHFEGN  
VGNHSINRSASGSNNGSNGQNGSSTAVNAGGTNMKSNNGLTGNSGSGDASGSVSANRVDQN  
KTSQREAALTKFRQKRKERRERCFHKKVFKEKQIHGAFLTFVVFFMETSSLS\*

>GmPRR42 (Glyma12g07860.1)

MPILSGIGLLCKIMSHKTLKNIPVIMMSSHDSMGIVFKCLSKGAVDFLVKPIRRNELKNLWQHVV  
RRCHSSSGSGSESATLTKFAKSRSDAYENNSDSSDENDYGSRLSIRDGSDNGSGTQSSW  
TKCLAQVGSPPHPVSPHKQLVDAPDSTCAQVMQTKTEKVVSRVWHATEKECHELIDLDDVARV  
KDLAMGISLNMQLEHPLEELSSNPIVKGANKMSDVEDDMQIIKRKSNVCEKQGLENGDKTGT  
QENQAMNAQGTGNVGSCLDNSSAAPNTETMHNFPSSHNGTSPSNQKSNNSNINDRASNNTY  
LGTKPDTDFDKKPESGRGIGSYNSCELLTEALNKDSKSSTLTISFTIITLPIKLHSTPQCVSSNAFG  
GPAESNAANYGVDGNAVESDHGSNNGQDGSNNLTIRTINVENGNVAAGSIGIGGIDRKSIGNGT  
DEVRLALREAALTKFRLKRKERCFEKRVRYHSRKKLAEQRPRIKQFVRRIVYGLKAKKKKIN  
KVTTWCLGTILSTFLNNTSQNGDHYLTDSVPLTASSFLLSD\*

>GmPRR43 (Glyma04g40640.1)

MGEVVIMSGEKKSVRVEGVEKEDSGGSGSKAGEFKGLMRWEKFLPKMVLRLVLLVEADDSTR  
QIIAALLRKCSYKVVAVPDGLKAWELLKGRPHNVLDLILTEVDLPSISGYALLTLIMEHEICKNIPVI  
MMSSQDSISTVYKCMRLGAADYLVKPIRKNELRNLWQHVVRRQSSTTINGLQDESVAQQKV  
EATAENNAASNRSSGDAACIQRNIEKIEKGSQAQSSCTKPDCEAESDPVGNMQEFSLLKCGEA  
YPSGTETQQVETSFRLLGQTLMMHDCHAGGLNVSIRKNGEASTTNDKDTDEHFGNASISGEAH  
DNPYVQINSSKEAMDLAGFHTHPNCSLKNSTVNCTGNFHDSPQLDLSLRRSCPGSFENKLT  
ERHTLMHSNASAFKRYTTRQLQISMPAVLINFSDDQREQITNCKNISHIATGSNSDSSTPMQR  
CIVSPTTVQSKESELATSHPPQGHSLPIPVKGVFRNDLCTAYGSVLPSVFHTQSGPPAMPSPNS  
VLLLEPNFQVNAFYQSNMKESSEQLYESRGPNGNTTQNHIVYTQEHSKSEHAEDRGHISPTTD

QSVSSSFCNGNASHLNSIGYGSNCGSSSNVDQVNTVWAASEGKHEDLTNNANSHRSIQREAA  
LNKFR LKRKERCYEKKVRYESRKKLAEQRRPVKGGQFVRQVHPDPLVAEKDGGKEYDHSDF\*

>GmPRR44 (Glyma16g02050.1)

MDELNCAMTTTTTENSNAELVQWERFLPRMVLRLVLLVEADHSTRQIIAALLRKCSYTVIAPVDG  
LKAWETLKKKASELDLILTEVELPAISGFALLSLIMEHDICKSIPVIMMSSHDSVNMALKCMLNG  
AVDFLIKPIRKNE LRNLWQHVVRRHTIITPTQNTTFSPKCLKTASEDNSASNKSNGSVASSKKN  
NECSERLSEAQSTCTSPIIMEAASTY MENMQDVSQDVHCQVMQTHVQSTCASPIFEAESTFVEN  
MQDVPQLESSKLNKIDMVDHEKFAKFERKSAKHND ETEDEK SIVTIVSEAARCDKSFELTDLMLEQ  
DCGVAEPETENEDEILKSELGRDNSHVSILHGCNAEQVKPSKG AIDLIATFGNLPKHPNENCSL  
NGGNTTKFDCETQLELSLRSDFP GSSGKQASESTEE SQRLNHSNTSAFSWYSNSKLLQPLFSP  
PSITSPKVNWL NWD SHECLKLSGNCQYDDSNQNL ENMISTVIGQYGLLPVSGVISKLKSEGHG  
HVFTSVFYAQSGIHPMLSPKPV CQNESSPFPTSTSSQSNPESHCS DQPHDCSNDATCLDQNVK  
DNTDSDHARHESPAADQSAGNNLCHDAANHVNSSAYGSMDSGNDGHATSAIVSKNTSDGFS  
DSGCHNYDGRVTD SHRSSQREAA LVKFR LKRKERCFEKKVRYQSRKRLAEQRRPVKGGQFV  
RQHNPFAEAGGDS\*

>GmPRR45 (Glyma07g05530.1)

MDELNGAMTTENSNAEVVRWERFLPRMVLRLVLLVEADHSTRQIIAALLRKCSYTVIAPVDGLKA  
WETLKKKAPELDLILTEVELPAISGFALLSLIMEHDICKNIPVIMMSSHDSVSMALKCMLKGAVD  
FLIKPIRKNE LRNLWQHVVRRHAISTPTQNTTFSPKCLKTASEDNSASNKSSG SVASSKKNNE  
CSERLSEAQSTCTSPIFEAESTYVENMQDVPQYVHCQVMQTLVQSTCTSPIFEAKSTYVENMQ  
DVPPLKSSKLNKIDMVKHEKFAQFERESA EHND ETEDEK SVTIVSDAARCDK TSELTELPEQD  
CGVAEPETENEDEILKSEL DGDNSHVSM MQGCSAERVKPSKG AIDLIATVGNLPKHL DENC SL  
NGGNTTKFDCETQLELSLRSDFP GSSGNQASEATEESQRLNHSNTSAFSWYSNSKLLQPHFS  
TPSITFPEVNNLSWDSHESHKLSGITSGNCQYGGSNQNL ENMIGTVICQYGVTPKLSNSQCGL  
LPVSGVISNLKSEGHGNVFTSLFYAQSGIHPMSSPKPV CQNESSPFPTSTSTQSY PESHNSDQL  
HDCSNDATCLNQNVDNTDSDHARHDS PVADQSAGNSLCHDAANHVNSSAYGSMDSGNDG  
NATSAIVSKNAPDGFSDSGCHNYDGRVTD PHRSSQREAVLVKFR LKRKERCFEKKVRYQSR  
KRLAEQRRPVKGGQFVRQHDHPVAEAGGDS\*

>GmPRR46 (Glyma05g06070.1)

MVFSANDLQEWKDFPKGLKVLLLRDNISAAEIRAKLEAMDYNVSTFCEENEALSAISSGLESF  
HIAIVEVSSSSGQGGFKFLEN AKDLPTIMTSNNHCLNTMMKCIALGAVEFLRKLPLSEDKLRNIW  
QHVVHKAFNARASILSESLKPVKESVVSMLQLQTDDEQHETPSTPQLRQGT RLLDDGDCQEQ  
TNCSTGKESGEHEGESKSVETT CGNLNAESTPQQRKSEITLVREEVESTPQQRKSEITLVKEEV  
DIVDASKGESVASPHTQKRKRKSEKDKNWTPELHKTFVKAVEQLGIDQAIPSRILELMKVEGLT  
RHNVA SHLQKYRMHKRQILPKEERKWLNL RERSYCVKRPIMAFPPYHSNH TLPLPPVYPMWG  
QSGSPTAGMQIWGSPGYPFWHTTAENWHWKPFPGMHADAWGCPVLP LPPPQTGFPYSQIF  
FIKSQNMP SLLNADAVDHTFTMPQSSFEHYPAEEVVDKVVKEAISKPWLP LPLGLKPPSPD SVL  
AELSRQGISNIPPKGSNSC\*

>GmPRR47 (Glyma17g16360.1)

MVFTANDLQEWKDFPKGLKVLLHERDNISAAEIRAKLEAMDYNVSTFC DENDALSVISSGLESF  
HIAIVEVSSSSAQGGFKFLEN AKDLPTIMTSNNHCLNTMMKCIALGAVEFLSKPLSEDKLRNIW  
QHVVHKAFNAGANILSESLKPVKESVASMLQLQTDNEQHESRVSIDIEKVSSFVDNDHELSPGN  
DKYPAPSTPQLMQGT RLLDDGDCQEQANCSTEKESGEHDGESKSVETT CGNLNAEITPQQRK  
SEITLVREEVDIVDASMGESVASPHTQKRKVL SNTDRNTKASNKVG VHS DSCEIRGKRKKIKVD  
WPELHKKFKV KAVEQLGIDQAIPSRILELMKVESL TRHNVA SHLQKYRMHKRQILPKEERKW  
SNQRERSYSVQRPIMAFPPYHSNH THPLPPVYPMWGGSGGPMAGMQIWGSPGYPLWQPTAE  
NWRWKPFPGMHADAWGCPVLP IPPQAPGFPYSQNMP ALLNADAADHTFTMPQSSFEHYLAE  
EVVDKVVKEAINKPWLP LPLGLKPPSTESVLAELSRQGISNIPPKGSKSC\*

>GmPRR48 (Glyma01g40900.1)

MVCTANDLQEWKDFPKGLRVLLLEGDSSSAAEIREQLEAVDYNVSTFYDENEALSALSSSPEG  
FHVAIVEVSTCSLGGFKFLENSKDLPTIMTSKDQCLNTMMKCIALGAVEFLSKPLSEDKLRNI



WQHVVHKAFNAGANVLSSESLKPVKESVESMLQLQTENGQDKSRISIDLENSAVCDKYPAPSTP  
QLKQGTRLLDDGDCHDQTNCSSTEKESVEHDGECKSVETLCENLNAESSPPQPREPKTLIKEEE  
DFANGSRGESAVSLSPNNKKFLSNADGNTSPNRTGVLNDSFMLHKKFVKAVEQLGIDQAIPSR  
ILEIMKVEGLTRHNVASHLQKYRIHKRQSAPREEDRKWHNQRDAMQRNYMQRPIWAYPPYH  
SNHTLSPAPIYPMWGGQPGSQTAGVQIWHGHPGYHIWHPTECHWKPYQGVHVDWAGCPLLPA  
PQAPCFPYNQNIPLHNPKAVDYRFGMPQSSFEHHPAEVVDKVVKEAISKPWLPPLGLKPP  
SMDSVLAELSKQGISIPLGNKRSSTPKLR\*

>GmPRR49 (Glyma11g04440.1)

MVCTANDLQGWKDFPKGLRVLLLEGDSSSAEIREQLEAMDYKVSTFYDENEALSALSSSPK  
GFHVAIVEVSTSCSLGGFKFLENADLPTIMTSKDQCLNTMMKICIALGAVEFLSKPLSEDKLKN  
WQHVVHKVDWTPPELHKKFVKAVEQLGIDQAIPSRILEIMKVEGLTRHNVASHLQKYRIHKRQSA  
PREEDRKWHNQGDAMQRNYMQRPIWAYPPYHSHHTLSPAPIYPMWGGQPGSQTAGVQIWHG  
PGYPMWHPTECHWKPYQGVHVDWAGCPLVPPPQAPCFPYNQNTPLHNPKAVDYRFSMP  
RSSFEHHPAEVVDKVVKEAMSQPWLPLPLGLKPPSMDSVLAELSKQGISIPLGNKGSSTPK  
PRRDVRPTPPPGPT\*

### cDNAs

>GmRR1 (Glyma02g03140.1)

ATCACATCGTATTTAAGATTTGCCACCCACGTTAAGGAATCCTCTTTTCTTTTCTTTCT  
TTCTTTCTCTTGATCTTTCATTTTTTTTCCCCTTCCCTTTTTTCGATGGACACGGACAGCTT  
GTTTCTTCGATCATGTTTCGCCGGAGGATTCCCACGAGGTTTATGTCTTGGCCGTTGATG  
ACAGCCTCGTCGATCGAAAGGTCATTGAACGCTTGCTTAAATCTCAGCTTGTAAAGTTAC  
TGCTGTGGATAGTGAATCAGAGCACTGCAGTTTCTGGGGCTGGACGAGCAGAGAAGGA  
CCTCTGAATCTGATGGTTTTGTCCCGGATTTGAAGGTGGATCTAATTACTGACTACTGC  
ATGCCCGAAATGACCGGTTACGAGTTGCTCAAGAAAATCAAGGAATCGACCATGTTTCA  
GAAATCCAGTAGTGATCATGTCTTCCGAAAACATTTTCCGCGCATAGACAGATGTTTGG  
AAGAAGGTGCAGAGGATTTATAGTAAAGCCAGTGAAATTATCTGATGTAACCGGTTAA  
AGGGTTACATGACACCCAAAGAGGTTATTAAGATGAGAAGCCAAGAAGACAGAAGAAGT  
GATGGCTATGTTAACGGTGGTGTGATGGTGGTGTCTGGAGATAAACAACAAAAGAAAGCTG  
GAAGAGCAAGACACCTCTGACGTGTCATTATCACACCGTCAACTTCTACCCTTTCATCAT  
CACCGTCCGTTTCCCTACCATCACCGTCATCTTCTCCTACTTCTTACGCCAGCGTGCTTGC  
TCTCAATCAGACGGCTTAAATGACCAGCACCGATTGACTCTCTGTTATGTCATCCACAG  
CAGCATTCTCTTTTTGCTCTTAAAGAAATTTACTACTATTATTATTGTTTTTCTCCTTCCGGG  
TTCGAATTGCAATTTCCCGTTGCGTGTAACGGTTTTTTGTTGCATTGCCCGCTCTTATCTT  
TGCTAATTTATTTGTTTGTGCTAAAGTTAATGAAGCATATTATTATTATGTGGC

>GmRR2 (Glyma17g10170.1)

CTACTTGTGTTCTGTTGTACTTTCTATTCTCATAAGATAACTAACTCACTTTGTGTGATAG  
AGTTCTCATTCTCATGGCTATTACCGGCGATATTTTCCGGCAGAGCATAACGGAAATGCTT  
GCGGAGTCCCTTCCGGTGCGCCAGAATTCACGTTCTCGCCGTCGATGACAGCCTCGTT  
GATCGCAAGGTGATCGAACGGTTGCTGAAGATTTCTTCTGCAAAGTGACGGTTGTGGAG  
AGTGGAACCGCGCTCTTCAAGTATCTTGGGTTGGAGGGAGAGAACGGTTCTTGGGTTT  
GATAGTGTTAAGGTTAATCTCATAATGACGGATTATCCATGCCGGGGATGACAGGATATG  
AATTACTCAAGAAAATCAAGCAGGAGTCTTCTGTGTTTAGAGAGATTCCGGTGGTGTGATCAT  
GTCATCGGAGAATGTTTTGACCCGAATTGATAGGTGCCTGGAGGAAGGAGCAGAGGATTT  
TCTGTTGAAGCCAGTCAAATTGTCAGATGTAAGACGCTTAAAGATTTTATCATGAAAGGG  
AAAGTGAAGGAAGGTGAGAAAATATCTCACAAAAGAATGAGGTCAATTGATTGCAGTCCA  
CCTCTAACTGCAACATGCTCACTATTGTCTTCCATGCGATCCATCACCATCATTACTCTC  
ACCATTATCCACGAAGAAGGCTAGATTGTGATCAGAGATTGAGTAGTAGTAGTGTGCTATG  
TCTCAATTTTGCCTACACTAGTGTTCAAATCAAAGCATGTAGTGTATTTTGCATTTGTTTAC  
CAATCTACACCTTACCTTAGGAACGAGAAAGCTAATGTCAGAGTCACTAATTTTTTGGCAT  
CTTGTGTTGCTACTGATCTTGTATGTACAGAGGAAATTTATCAAATTTATAAAATAGGG  
CGTATTTTGCACCAACATTTATTTTTTACATAAATACCTCGTTTTGTTT

>GmRR3 (Glyma05g01730.1)

ATCTCCCCATTTATTTTTTTCATTATTTATTACGCGTCCTTCTTTCTCTCTCCTTTACCATGT  
AAATAAAGCCCACCATTTTCCATTTCCATGTATCTGTGTACTTTCTATTCTTAGAAGAAAGA  
AGAAAACACTACTTTTGTAGAGTTCGAGTTCATTCTCATGGCTATTACCGGCGAAATTTTC  
CGACAGAGCATAAAGGAAATGCTTGAGGAGTCTCCTTCCGGTGCGCCGGAACCTCAAGTT  
CTCGCCGTTGACGACAGCCTCGTTGATCGGAAGGTGATAGAGCGGTTGTTGAGGATTTCTT  
CCTGCAAAGTGACGGTTGTGGAGAGTGAACGCGTGCTCTTCAGTATCTGGGGTTGGACG  
GAGGGAACAGTTCTCTCGGGTTTGATAGTGTTAAGGTTAATCTCATAATGACGGATTATC  
CATGCCGGGGATGACTGGATATGAATTACTCAAGAAAATCAAGCAGGAGTCTTCTGTGTTT  
AGAGAGATTCGGTGGTGATCATGTCATCGGAGAATGTTTTGACCCGAATTGATAGGTGC  
CTGGAGGAAGGAGCAGAGGATTTTCTGTTGAAGCCAGTCAAATTGTCTGATGTAAGACGC  
TAAAAGATTTTCATCATGAAAGGGAAAGTGAAGGAAGGGGAGAAAATATCTAACAAAAGA  
ATGAGGTCAATTGATTGCAGTCCACCTCTAACTGCAACATGCTCACCAGTGTCTCTCCAT  
GCGATCCTCCATCATCATCCTCATCATCATTACTCTCACCATTATCCTCAAAGAAGGCTAG  
ATTGTGATCAGAGATTGAGTAGTAGTGTGCTATGTCTCCAATTTTGCCTACACTAGTGTTCA  
TATCAAAGTATGATGTATTTTGCATTTGTTCCACCAATCTCTATACCTTAGGAATCAGAAA  
AGCTAATGTCAGAATCACTAATTTTTTGGCCTCTACTTGGTCTCCTGATCTTGCTATGTATTA  
TGTACAGAGGAAATTTATCAATAATTTATAAAATAGGGCGTTATTTTGACCAAC

>GmRR4 (Glyma08g40330.1)

GAGGATTCCTTCGTCCTGTCTCTGTCTTTCTTACTCTCTCTCTCTCTCCCCTTTCTCTCTCT  
CTCTTTTTCTATCCTCGAAGCAAGAAATGGACTCTAACAGCGTCGTTTCTTGCCGAGGTT  
GCCGAAAACATCGACGTTTTCGGTATCAAACAGAAACAATCCGAAGAGGTTTCATGTTTT  
AGCCGTTGATGACAGTATCGTTGATCGCAAAGTCATCGAACACTTGCTCAAAGTCTTAGCT  
TGTAAGTTACTGCTGTGGATAGTGGGCTGAGAGCACTGCAATTGCTTGGACTATTGGACG  
AGCAGAAAATCCCCTCTGAAACTAATGGTTTTGGGGTTTTAAAGGTGGATCTAATCATCAC  
AGACTATTGTATGCCCGAATGACCGGTTATGAATTACTCAAGAAAATTAAGGAATCCTCC  
AGTTTCAAGGAAACTCCTGTGGTGATTATGTCCTCCGAAAATGTTTTGCCACGCATAGACA  
GATGTTTGGAGGAGGTGCAGAGGATTTCATAGTGAAGCCAGTGAAGTTATCAGATGTGA  
AGCGTTTGAAGGATTTTCATGACAACAAAGGAGGTTATAAGGGGTGAATTAAGCCAAGAAG  
AAAGGGAAGGATCAACAAGAGGAAGCTATTAGACACCTCTGATGTGTCGCCATCATCAC  
CACCGTCCATTTCTCATCACCCTCCATCGTCACCCAGCTCAGTGATTGATTCTCCAAT  
CAGACGGCTTAAAATGACCGGCACTGATTGATATTCTCTAGCAATTAATTTGCTGTTTTCT  
TAATTTTCTCATTCTGTAGGCACTACAGCTGCAAGCCTGCAATGTCTATCTTTATAATTAT  
AAATAGTAGTGTTTTTTTCTTCTTC

>GmRR5 (Glyma18g17330.1)

ATGGACTCTAACAGCGTCGTTTCTTGCCGAGGATGCCAGAAAACATCAACGGTTTCGGC  
CTCAAACAGAACCAATCCGAAGAGGTTTCATGTTTTAGCCGTTGATGACAGCACCGTTGATC  
GCAAAGTACCGAACACTTGCTCAAAGTCTTAGCCTGTAAAGTTACTGCTGTGGATAGTGG  
GCTGAGAGCACTGCAATTGCTTGGACTATTGGACGAGCAGAAAATACCCCTGAAACTAA  
TGGTTTTGTGGGTTTTGAAGGTAGATCTAATCATCACAGACTATTGTATGCCCGGATGACC  
GGTTATGAATTACTCAAGAGAATCAAGGAATCATCTACTTTCAAGGAAACGCCTGTGGTTA  
TTATGTCATCTGAAAACGTTTTGCCACGCATAGACAGATGTTTGGAGGAGGGTGCAGAGG  
ATTTTCATAGTGAAGCCAGTGAAGTTATCTGATGTGAAGCGTTTGAAGGATTACATGACAAC  
AAAGGAGGTTAGGGGTGAATTAAGCCAAGAAGAGAGGGGAAGGGATCAACAAGAGGAAG  
CTATTGGACACCTCTGATGTGTCGCCATCATCACCACCGTCCATTTCTCATCACCCTTCC  
ATCTTCACTCAGCTCAGTGATTGACTCTCCAATCAGACGGCTTAAAATGACCAACACTGAT  
TGA

>GmRR6 (Glyma15g37770.1)

ACATTATTCTTCATCTCTATCCCTCTTCTTCTTTTCATCCATTTTTCTTCTTCTGTT  
GTGGCTAGCTAGCACATAATATCTTCCAAGTTATTATGGCTATGACTGTAGAGGCTCAGTT  
CCATGTTTTGGCTGTTGATGACAGTATTATTGACCGAATGCTGATTGAGAGGCTCCTAAAA  
ACCTCTTCTTTCATGTTACTACAGTGGACTCTGCCACTAAGGCCTTAAAATTTCTTGGTTT  
GGTTGAAGATGAGTTGAGGACTTTTGCACCACTGTTGCATCAGAAATTCATCAGGATGTA  
GATATAAACCTGATTATAACAGATTACTGCATGCCAGGAATGACTGGCTATGATCTGCTGA  
GAAAATCAAGGAATCTAAATCTTTAAAACATACCAGTTGTGATTATGTCCTCAGAGAA  
TGTACCATCAAGGATCAACAGATGCTTGAAGAGGGAGCAGAAGAGTTCTTTCTGAAACC  
AGTTCAACAGGCAGATGTGAACAAGCTGAAGCCACATTTGATGAAATCAAGAGCAAAGGA

AGAGCAAGACCAACCCTTCAATAACAAAAGGAAGGACATGGAAGAAATCCATTCCCCAAA  
TAAAACCAGAATAAAATGTAGCAGTAAAATTGGTTTCAAATTAATAAATAAAAAAATTGAT  
GAAACATAGGTAGTGCCTATAACATTTTCTTCTCTCGCTTGCTTGGTAGTAAAAGTTA  
GGCAGTCAATAATCATGCAAAGGGATAAAGAGTACAAGTCATTTATGTAATAGCCTGA  
GAAAGAATCCATTCAATTTTGGTCATCAAATATCATTTCATTTTGACAAGTC

>GmRR7 (Glyma04g42680.1)

CATGCACCTACTAATAGCAAAAAAAAAAGCTAAGAGGGATAATTACATTCCACCTCTCCTT  
CCCATTCTCACTCTCTCTCTCTTTCTATTTCTCTCTCCGTGCGTGACCTTGAATTACTGAT  
ATTTTATATTTTAAACCAGCTATATATATTACAAGAAAACATAGATAGTGTGTGTTTCATCAGC  
TTATTCTCAAACCTGATATGGAGTTTGTGGATACCAGAAAACATAATTACAACATCAACA  
ACAACTGCAACAACAGCCGCAACATTTTCATGTGTTGGCAGTGGACGACAGTGTATAGA  
TAGGAAGCTATTGGAGAGGCTCCTTAGAGGTTCTTCATGCAAAGTTACCTGTGTGGACTCT  
GGAGACAAGGCTTTGAAATATCTTGGGCTAATAGATGAGCTTGATGATACTTCTTCAACCT  
CTTTAGAATCAGAATCTTCTCATCCTCCACCTCAACCATTACAACGAGAGGGAATCAAAGT  
GAATTTGATCATGACAGACTATTGCATGCCTGGGATGAGTGGCTATGATTTACTCAAACGA  
GTCAAGGATCTTCTGGAAAGATGTTCCAGTCGTGATTATGTCATCAGAAAATGTACCTT  
CCAGAATCAGCATGTGCTTAGAAGAAGGGGCAGAAGAGTTTCTATTGAAGCCTCTTCAGTT  
ATCGGATTTGGATAAGCTTCAGCCGTACTTTCTGAAATCCGTTGATAATTCCTGTGAAAA  
GAATCTGCTAACAGTTCATAGATTCAGACAATGACAATGTCATCAACAACAACAGCAATA  
ACAGTAACAGTAACAATAACAACAACAATAGCATCAGCAAAGGAAGGCCATGTCTCCTG  
AGCCTCATCGGGAGGAGAGATCAAGACCCAAAATGAAAGAGTTAGCGGTGGTGTAAAA  
AAAACAACACTATAGAGAGAGGTTGATGGATGCATGCATAGGTATTATATATTATAGTTA  
TGACTATGATCCTAATTATGGATATCTCCTCTACTCTAAGAGCTTAATTAATGAATTCCAG  
TGCCTACTAATGTTGTTACAGTTACCATTTACCTTC

>GmRR8 (Glyma06g12100.1)

GTGTTTCATCAGCTTATTCTCAAACCTGATATGGAGTTTCTGGATACCAGAAAACACAGTTA  
CAACAACAACAACCTGCAACAACAGCCACAACATTTTCATGTGTTGGCAGTGGACGACAGT  
GTCATAGATAGGAAGCTTTTGGAGAGGCTCCTTAGAGGTTCTTCATGCAAAGTTACCTGCG  
TGGACTCTGGAGACAAGGCTTTGAAATATCTTGGGCTAATTGATGAGCTTGATGATACTTC  
TTCAACCACTTTAGAATCAGAATCTTCTCATCCTCCACCTCAACCATTACAGCAAGAGGGA  
ATCAAAGTGAATTTGATCATGACAGACTATTGCATGCCTGGGATGAGTGGCTATGATTTAC  
TCAAACGAGTCAAGGGATCTTCTTGGAAAGATGTTCCAGTCGTGATTATGTCATCAGAAAA  
TGTACCTTCCAGAATCAGCATGTGCTTAGAAGAAGGGGCACAAGAGTTTCTATTGAAGCCT  
CTTCAGTTATCGGATTTGGATAAGCTTCAGCCGTACTTTCTGAAATCGCTTGACAATTCTTG  
TGAAAAAGAACTGCTAACAGTTCATAGATTCAAACAATGACAATGTCATCAACAACAAC  
AGCAATAACAGTAACAATAACAACAATAATAATTAGCAAAGGAAGGCCATGTCTCCT  
GAGCCTCATCAGGAGGAGAGATCAAGACCCAAAATGAAAGAGTTAGCGGTGGTGTAAAA  
AAAAAAAAACACTATATATAGAGAGTGGTCGATCGATGCATGCATACGTATTATACATTAT  
AGTTTATGACTATGATCCTAATTA

>GmRR9 (Glyma03g28570.1)

CCTCAACATATTCATAAGATTTATTTCTTTATTTTATTCATTTAATTATTTGTTCCTAGTCT  
TTATCTTATAATAATTTTCGCATTGCTTGCCCGTAATTCAAGATCAACTTGGAAAATTTGC  
AAGATTTGGGATGAAATCTGGTTCGGATCTTGCTTTGTGGGATGGGGATTTTGGTGGGTCTT  
ATTTCAATACAAAGCTCTTCTCTTCTTCCAAAATCCCATCTCTTTCTTTTTTTTTCAT  
CATAACACAAAACACAAAACATAAACCTTTCTTCCAACCAACCCTTTTTTCCAATTCTTTGT  
TTCTTCCAAAATCTTCAATCCAATTTTTCACCTTTTCAACAATGGGGATGGCTGCAGCGGAG  
TCACAGTTTCATGTCTTGGCTGTTGATGACAGCATCATAGATAGGAAACTCATTGAGAGGC  
TCCTCAGAACCTCTTCTATCAAGTTACTACAGTTGATTCTGGTAGCAAGGCTTTAGAGTTT  
CTGGGGTTGCGTGAGAATGATGAGAGCAATCCAAGTATACCATCTGTTTGTCCCAACAAC  
CATCAGCCTCAGGAGGTGGAGGTGAATCTTGTATAACAGATTACTGTATGCCTGGCATGA  
CAGGCTATGACTTGCTTAAGAAAATCAAGGAATCTTCATCTTTGAGAAACATACCAGTGGT  
GATTATGTCATCTGAAAATGTGCCTTCAAGGATTAACAGATGTTTGGAGGAAGGAGCCGA  
AGAATTTTTCTTGAAGCCTGTGAGGTTGTCAGATTTGAACAAGCTTAAACCCACATGAAG  
AAAACCAAGTTCAAAGATCAAAGCAAGAAACAGTAGAAAGGTTTGAAGACTCAGAAGTT  
CAACAGCAACAGTCACAACAACAATCATCATCCAAAATGAGCATCACCAGCACCAAAA  
TTACAAGTTCTTCAGCCAGAGTCAGAATCAGAGTACATCCACAACCAACTATTGAACAAC

AGCAACAAATTCTACAACAAGCCAACAACAATAACAAGAGGAAGACCATGGAACAGGGC  
CTTTCACCTGAGACTGACAGAACAAGACCAAGATACAGTGGCATAGCCACTGTGGTATGA  
TCATAAAAATCATTGGCAAAAATTTTCTTGAATTTCAAAAATGTAATTCTCATATAACTTTT  
TTTTCTTTCTTTAAAAACAATAACTCAAGTGGTTAATATAGGCTCTATAGGAGTGTA  
ATAGAGTTGTTTCCTGTACACATTTTCTGGAAATATTTCTTCCAATTTTGCTTCCCCCAA  
TATAATGAAAAGGAAAAAATATTGAATTGAGTA

>GmRR10 (Glyma19g31320.1)

ACCCTCAACAACCTAAAAATATTTCACTAAGATTTATTTCCCTTATTTTATTCATTTATTCTTT  
GTTCTAGTCTTTATCTTATAATTTCTCATTGCTTGGCCGGTAATTCAAGATCAACTTGGA  
AATTTGCAAGATTTGGGATGAAATCTGGTCGGATCTTGCTTTGTGGGATGGGGATTTTGGT  
GGGTCTTATTTCAATACAAAGCTCTTCTCTCAATCCCATCTCCCTCTCTTCTTCTTCTT  
TTCTTCTCATAACACAAACACAAAACATAAACCTTTCTTCCAACCAACCTTTTTTCCAATTC  
ATCTTTGTTTCTTCAAAAATCTTCAATCCATTTTCACTTTTCACAAATGGGGATGGCTGCA  
GAGTCACAGTTTCATGTCTTGGCTGTTGATGACAGTCTCATAGATAGGAAACTCATTGAGA  
GGCTCCTCAGAACCTCTTCTTATGAAGTTACTACAGTTGATTCTGGTAGCAAGGCTTTAGA  
GTTTCTGGGTTGTGTGAGAATGATGAGAGCAACCCAAGTACACCATATGTTTGTCCCAAC  
AACCATCAGGAGTGGAGGTGAATCTTGTTATAACAGATTACTGTATGCCTGGCATGACA  
GGCTATGACTTGCTTAAGAAAATCAAGGAATCTTCATCTTTGAGAAACATACCGGTGGTGA  
TTATGTCATCTGAAAATGTGCCCTCAAGGATTAACAGATGTTTGGAGGAAGGAGCAGAAG  
AATTTTTCTTGAAGCCTGTGAGGCTGTCAGATTTAACAAGCTTAAACCCCATATGAAGAA  
AACCAAGTTGAAAGATCAAAAACAAGGAACAGTAGAAAAGCTTGAAGACTTAGAAGTTCA  
ACAGCAACAGCCACAACAACAATCATCATCCAAAATGAGCAGCAACAAGCACCAAAATC  
CCGAGATCTTCTCAGCCAGAGTCAGAGTCACATCCACATGCACAACCAACTATTGAACA  
ACAGCAACAATCACTACAACAAGCCAACAACAATAGCAAGAGGAAGACCATGGAACAGG  
GCCTTTCACCTGAGACTGACAGAACAAGACCAAGATACAGTGGCATAGCCACTGTGGTAT  
GATCATAAATCATTGGCAAATAATTTTCTTGAATTTCAAAAATGTAATTCTCATAACTTCTT  
CTTCTTCTTTAAAAAATAACTTAAGTGTGGTTAATATAGGCTCTATAGGAGTGTAGT  
AGAGTTGTTTCTGTACACATTTTCTGGAAATATTTCTTCCAATTTTGCTTCCCCCAATA  
TAAATGAAAAGAAAAAGAAATATTGAATTGAAAAGAAATTATCAGATGATAAA

>GmRR11 (Glyma11g21650.1)

ATCACATCACTTTTACCCTTCTATTCTTATTCATTTATCTCTTCTCCTTCTTTTTTTCTGTTA  
TTCTCCCTTGCTTCTTTGTTTTGGCTTGCATTTTACATCAGCATAAAAATCATGGGTATG  
GCTGCAGAAGCTCAGTTCCATGTTCTGGCTGTTGATGATAGCCTTATTGACAGAATGCTGA  
TTGAGAGGCTCCTCAAACCTCTTCTTTTATGTTACTGCTGTGGATTCTGGTAGTAAGGCT  
TTGAAGTTTCTTGGTTTGGTTGAAGAGAAGAGAAATGAGGAGCCTCCTCCCTGTATTGCTC  
TAGAATCCCATCAGGATGTAGAAGTAAACCTGATCATAACTGATTACTGTATGCCAGAAAT  
GACTGGCTATGATCTGCTGAGAAAGATCAAGGAATCTAAATCTTTAAAGACATACCAGTG  
GTGATTATGCTCTCAGAGAATGTCCAGCAAGGATTAACAGATGCCTAGAAGAGGGAGCT  
GATGAATCTTTCTGAAACCAGTTCAACAGTCAGATGTAACAAGCTGAGGCCACATTTGA  
TGAAATCAAAAGTTAAGGATGGGGAAGACCAACAATCAGTAACAAGGAAAGAAACA  
GAAGAAAGCCATTCCCCAGATAAAACTAGGACAAAAATGGAGCCTCAAAAAGTGGTTAAT  
TTCAGTTAAAAATTGATTATAATTGATACATCATAGATGTTCCCTAGAAAATTTTCTATCCT  
CTGTCTCACCAACTAACTAGTGAGAAGAGTAGATGGCATCTCAATCATACTAAAGAAATGT  
GTAGTATAGGCCCTGACATTAACAGAATTTTCAATTTCAATTTTGTCTGACATATA  
AATTATAAATTGTTTCAGCTCTTAATCTTATGTGACTAATGCACAAAA

>GmRR12 (Glyma04g29250.1)

ATCTCACATCACTTTCTTCATCCTTGTATTCTATTCTTTTCTTATTCATATCTCTTCTTCTTTT  
TTCTGTTATTATTCCTTGCCTCTTTTGTGTTTTGGCTTGCATTTTACATCATCAGAATCATGG  
GTATGGCTGCAGAGGCTCAGTTTTCATGTTCTGGCTGTTGATGACAGCCTTATTGACAGAAT  
GTTGATTGAGAGGCTCCTCAAACCTCTTCTTTTATGTTACTGCTTTGGACTCTGGTAGTA  
AGGCTTTGAAGTTTCTTGGTTTGGTTGAAGATGAGCAGAGAAATAAAGAGCCTCCCTCTAT  
TGCTCTAGAATCCCATCAGGATGTAGAAGTAAACCTGATCATAACTGATTACTGTATGCCA  
GAAATGACAGGCTATGATCTGCTGAAAAGATCAAGGAATCTAAATCTTTAAAGACATAC  
CAGTGGTGATTATGCTCTCAGAGAATGTCCAGCAAGGATCAACAGATGCCTAGAAGATG  
GAGCTGATGAATCTTTTTGAAACCAGTTCAACAGTCAGATGTAACAAGCTGAGGCCACA  
TTTGTGAAATCAAAAGTTAAGGATGAAGAAGTCCAACAATCAACAAAAAAGGAAGG

AAACAGAAGAAAGCCATTACCAGATAAAACTAGGACAAAAATGGAGCATCAAAGAGTG  
GTTAATCTCAGTTAAAAATAAATGATACATCATATAGATGTGTTCCCAAGAAAACCTTACATC  
TCCTCTGACTCGCCAATACTAGTGAGAAGAGTAGATGGCATCTCAATCATACTGAAAGA  
AATGTGTAGTATAGGCCACTGACAGAAGAGAGAATTTCAATTTCAAATTTCAATTTGTCTGA  
CAAATATAAATTGTTGAGCTCTTTCTCTTAGGTGATTAATGCACAAGATTTTTTTTTCTA

>GmRR13 (Glyma13g03560.1)

CTTTCTAATCCCCCCTCTCTCTCACACACATCACGCATTGTGTGTAATGATAAATATA  
AACGAATTTTCAAGTAGATAAGTTAGCTAACAGGTTAAGAAGATTGTTTATCTGAACACTA  
CGTACTGAGATGGAGCTTGTGAATAGCCAAAAGCTAAAACAACATGAGCAGCAACAGCAT  
TTTCATGTGTTGGTGGTAGATGATAGTGCATAGATAGGAAGCTTTTGGAGAGGCTCCTAA  
GAGATTCTTCATGCAAAGCTACCTTTGTGGATTCTGGAGACAAGGCTTTGAAATTTCTTGG  
CCTGCTTGATGATGACCTTGATAATTCTTCTCAACTTCTTCGGAATCATTGCAACTAAACG  
GAATCAAAGTGAATATGATCATGACAGACTACTGCATGCCAGGAATGAGTGGCTATGATTT  
ACTCAAACGAATCAAGGGATCTTCTTGGAAAGATGTGCCCGTGGTCATAATGTCATCAGAA  
AACGTACCATCTAGAATCAGCATGTGCTTGGAAAGGAGGGGCAGAGAAGTTTCTATTGAAG  
CCTCTTCAGCAATCAGATTTAGAAAAGCTTCAGCCATGCTTTCTCAAATCCTCTGATAATTC  
TAGTGAACAAGACCAATCTGCTGAAAGATCTGTAGCTTCTCACGATAATGACAATTATATC  
GATACCATTAAGGCATTGTGTCCGGAGCATGGTTTTAAACTGCAATTTGTATCGACAATTG  
CAACTACAATATTGCGATTTTGGAAAGTCTCTATAGTTGCTACACAATTATATATGTAATTGT  
GTCAAGTACATTTTCCAGTAATTGTACACAGTTTGTCTGTAACACATAACTGTCACAATT  
TAAAATTACATGTAAGACATCAACAAAGTTAACTCAATTATTTGAGTAGGAATGTATGA

>GmRR14 (Glyma06g19870.1)

ATTCATTATAAAGCATAACCATCTCTCTCTCTTTCATTCTTGAGGTCTTCTTTCAATTTATA  
CCATTCTTCTTATTTCTTTTTACCAATCACTACTTATTCAATCCAAGGATGGCTTCCGCCGG  
CGATCTTTTACGCATGGTTTCCCGGAAGTTGGTGGTCCCGGAAGTTACACGTGCTTGCT  
GTTGATGACAGCCACGTGGACCGCAAGGTGATCGAGCGGTTGCTCAAATCTCGTCTTGC  
AAAGTGACGGTGGTGGAAAGTGGTAGCAGGGCTCTACAGTATCTGGGGTTGGATGGAGA  
AAAAAGTTCCATTGGTTTTGATAGTGTGGATGTTAATTTGATAATGACGGATTATCCATGC  
CGGGGATGACAGGATACGAATTGCTCAAAAAGATTAAGGAGTCATCTGTTTTAGAGAGG  
TTCCAGTGGTGGTTATGTCGTCTGAGAATATCTTGACCAGAATTGATAGTTGCTTGGAGGA  
AGGAGCAGAGGAGTTTCTGTTGAAACCTGTCAAGTTGTCAGATGTAACGCGTAACAGA  
TTTCATCATGCGAGGGCAAGGGATGAAAGGAGTAAAAAGATCTAAAAAAGAAGCCGATC  
AGATGATTGCATTCCATCTCTATCAACTGCATTTGCATCAGTTTCTCATCCATGTGATCTAT  
CATCACCTCCATCACCATGTGTATCGCAATCGAAGAAATCTAGATTGAGCATATAGATTGA  
GCAGCAATGTTTATGTCTCCATTTTGCCTAACCATTGTTTCAATTTCAAAGCCTCTGATGT  
AATTTGCGTTTTTACTAAACATTGCTGACAACGACTACTAGAATTAGGAATGAGGAAGA  
GGATGACAGAGTCATTTTGTCTTGTAGTTGCGTTCGCTTACATATTTTTTGTGATTTTGTG  
CTGTACAGAGAAAGTTCAATAAATTAATGAAACCCTCTATTTTGAAGGGTCTTCAAATTTT  
GTTT

>GmRR15 (Glyma04g34820.1)

AAACAAGATCTCTCTGATTTGGATCCTCCGAATCTCCCCTCTTTTCAATTTTCAATTCTTCTT  
ATTATTTATTCACCCTTTTCCCCTTCTTACCATTCAATTTCTTTTATAATACCATTCTTTTTT  
CTCTTTATCTCTTTCATCAATACTTCATCGTTTTCGTTAAGGGATGGCTTCTGCCGGCGATG  
TTTTCAGGCAGGGTTTCCCGGAAGTTTGTGCTGCCGGGAAGTTACACGTGCTTGCTGTTGA  
TGACAGCCACGTGGACCGCAAGGTCATTGAACGGTTGCTCAAATCTCGTCTTGCAAAGT  
GACGGTGGTGGAGAGTGGAAAGCAGGGCTCTGCAGTATCTGGGGTTGGATGGAGAAAAAA  
GTTCCATTGGTCTTGATAGTGTGAAGGTTAATTTGATAATGACGGATTATCCATGCCCGG  
GATGACAGGATATGAATTGCTCAAGAAGATAAAGGAGTCATCTGTTTTTAGAGAGGTTCCA  
GTGGTGGTTATGTCGTCTGAGAATATCTTGACCAGAATTGATAGTTGCTTGGAGGAAGGAG  
CAGAGGAGTTTCTGTTGAAACCTGTCAAGTTGTCAGATGTAACGCGTAACAGATTTTCAT  
AATGAGAGGTGAAGGGATGAAAGGAGTAAAAATATCTAAAAAAGAAGCCGATCAGATG  
ATTGCATTCCATCTCTATCAACTGCATTCTCATCAGTTTCTCATCCCTGTGATATATCATCAC  
CTCCATCGCCATGTGATTGCAACCGAAGAAATCTAGATTGAGCATATAGATTGAGCAGTG  
ATGTATGTCTCCTCATTTTTGCAAACCATTGTTTCAATTTCAAAGCCTCAGATGTAATTT  
CGTTTTTACTAAACATTGCTGACAACGAGTACTAGGATTAGGAATGAGGAAGAGGAT

GACAGAATCATTTTGTCTTTAGTTCGGTGGCTTACATATTTTTTTTTGTTTCATTCTGATGCTG  
TACAGAGAAAGTTCATTAATTAATGAAACCCTCTATTTTGAGGGGTCTTACCTCA

>GmRR16 (Glyma06g14750.1)

GTTTTGAATACGCGAGCAAGGTGGGGACTGAATCAAATCCTAGATACCCGAAAAGGATCA  
CGTTATATCTGTGACTTGATTTTTATCTCTCTGATATAAAGTTTGATTCTTTCTTCTCTCT  
GGTTTTCTAAAATTCCTCGCCACCAACCACCTTCGAATTCATATCCATTTACTCTCCCTG  
TATATATAGGGATATCGTTACGTTACATACTCTTGTGACTTTAACTTATGTTTTCTCTC  
TTCATTTATGCATATACATACGTCTTGTCAACCCTATGCGTTTTTGTTCCTTTCTTCCTCT  
CTTCTCTTACAATTAATACTATTATTAATTGCAACTGCGTTTATTAGTTTACCTTCTTGAGTA  
ACAACATATTTACTCATCACTAGTGTAGTTGTGGGGAAAAAGGAAAAAACAATACTGA  
GAGAGAGAGAGAGAGAGGTAACGAGGACACAGTAGTACCATTTATCCTCTGCTTATTT  
ATTAGCTATCAGCAACGCTTCGCATGGCTGCAGGTTCTTCTTCAAATTTGGGTCATGGAAG  
TGGTGATGTTCTCATGTTTTGGCCGTTGATGACAACCTTATTGATCGCAAACCTCGTTGAGA  
AACTCCTCAGGAATTTCTTCTGCAAAGTTACAACCTGCAGAAAATGGGCCAAGGGCATTGG  
AATTATTGGCTTAACAAGTGGTGGACAGAACCATGAACGGTAGATCCAAAGTAAATA  
TGGTTATCACAGACTATTGCATGCCAGGGATGACAGGCTACGAGCTACTTAAGAAAATCA  
AGGAATCGTCGGTAACGAAGGAGGTTCCAGTAGTGATCATGTCATCTGAGAACATACCAA  
CACGAATTAACAAGTGTCTGGAAGAAGGAGCTCAGATGTTTATTCTAAAGCCCTCAAAC  
AATCTGATGTAAAAAACTGACATGTCAGTTAATGAATTGAGAAAGTGAGATTTGACTTTT  
AAGAGAGTATAAGCTAAGCAAGAAGGCAAACCTCTATGAGATCTGTGGTCTGGTAATGTGA  
GCAGCATTCCAGAACCCTGCACCTTGCATGGCTGTCTATTGCTAAAATCTATATTATATAG  
CCTTACCCTCTAATTTTAGTACTAGTTCAGGTGTAGGAATGCGTTTCATTGTTTTGAAGATG  
CTTACTTTCTTTCTTCTCACTCTTCTTGTATTGACCTACATATTCCATTTTATTTTCCTAGAA  
TATAATTCATGTTCTTTTTTTTCAATGTT

>GmRR17 (Glyma04g40100.1)

GTGACTTTCAACTTATGTTTTCTCTCTGCATTTATACATATACGTCTTGTCAACCTAAGCGTT  
TTTGTTCCTTTCTTCCTCTTCTCTCCACAATTAATATTATTAATTGCAACTGCGTTTA  
TTAGTTTACCTTCTTGTGTAACAACATGCTAGTAGTACATACCTTCTTCTTCCCCGTTA  
CCATCTTTTCTCATCACTAGTGTAGTTGTTGTGGGGAAAAGGAAGAAAAACAACAACA  
TAAGAGAGAGAGAAGGAAACGAGGACACAGTAGTACCATTTATCCTCTGCTTATTTATTA  
GCTATCAGCAACTGCTACGCATGGCTGCAAGTTCTTCTTCAAATTGGGTCATGGAAAGTGG  
TGATGTTCCCTCATGTTTTGGCCGTTGATGACAACCTTATTGATCGCAAACCTCGTTGAGAAC  
TCCTGAGGAATTCTTCTTGAAGTTACAACCTGCAGAAAATGGGCCAAGGGCATTGGAGTT  
ATTGGGCTTGACAAGTGGTGGACAGAACAACATGAACGGTAGATCCAAAGTAAATATGAT  
AATCACAGACTATTGCATGCCAGGGATGACAGGCTACGAGCTACTTAAGAAAATTAAGGA  
ATCGTCTGTAATGAAGGAGGTTCCAGTAGTGATCATGTCATCTGAGAACATACCAACACG  
GATTAACAAGTGTCTGGAAGAAGGAGCTCAGATGTTTCTTAAAGCCCCTCAAACAATCT  
GATGTAAGAAAATGACATGTCAGTTAATGAATTGAGAAAGTGAGATTTGACTTTTAAAG  
AGTCTAAGCTTAAGCAAGAAGGCAAACCTATAATGAGATCTGTGGTCTGATGTTGAG  
CAGCAGACTCCAGAACCCTGCATTTGTCTAGGCGTCTTTTGTAAAATCTATAGGCCCT  
AACCAGAATGTTACCCTCTAATTTTAGTACTAGTTTAGGTGTAGGATTTTATTTCATTGTTTT  
TGAAGATGCTTTACTTTCTTGTAGACCTACATATTCCAATTTATTTTCTAGAATAAAT

>GmRR18 (Glyma13g26770.1)

ATGGCTATGACTGTGGAGGCTCAGTTCATGTTTTGGCTGTTGATGACAGTATTATTGACA  
GAATGCTGATTGAGAGGCTCCTAAAAACCTCTTCTTTTCTGTTACTACTGACTCTGC  
CACTAAGGCCTTAAAATTTCTTGGTTTGGTTGAAGATGAGTTGCGGACTTTTGACTACTG  
TTGCATCAGAAATTCATCAGGATGTAGATGTAACTTGATTATAACAGATTACTGCATGCC  
AGGACTGACTGGCTATGATCTGCTGAGAAAAATCAAGGAATCTAAATCTTAAAAACATA  
CCAGTTGTGATTATGTCCTCAGAGAATGTACCATCAAGGATCAACAGATGCTTGGAAAGAG  
GGTGCAGAAGAATTTCTTCTGAAACCAGTTCAACAGGCAGATGTGAACAAGCTGAAACCT  
CACTTGATGAAATCAAGAGCTAAGGAAGAGCAAGACCAGCCCTTCAATAACAAAAGGAAG  
GACATGAAGGAAATCCACTCCCAAATAAAACCAGGATAAAATGTAGCAGTTAA

>GmRR19 (Glyma17g03380.1)

GTCTTCTCTTTCTTTCTTCTACTCCGATTCCTGAGTTGCGTTGGTCTTGGTGGAGTTACAAA  
CTCAGCAGCAGAAGAAGAAGCTCCTCAATTGTTAACCTCAAATTCGATTTCGAACTATGTA  
AACGCCACTTTCGTGTCGGGTTTGTGTCTCTGCTTTGTTGCTTGCCTGTTACTGTTCTCT

AGTTCGGATCTCCCAAGCATGAATCTCAGCAACGGAAAGGGATCCATGTCAACGCTTACT  
GCAAGCGTCGTTATGAAATCCGGCGACGCCGTCTCCGACCAGTTTCCGGCGGGTCTCCGG  
GTTCTCGTGGTGGACGATGACCCACGTGTCTCATGATTCTTGAGAAGATGCTCCGCACGT  
GCCTCTACGAAGTTACCAATGCAATCGAGCAGAACTGCTCTCTCACTGCTTAGAGAGA  
ACAAAATGGGTTTGACATTGTTATAAGCGATGTGCATATGCCGGACATGGATGGATTTAA  
ACTTTTGGAGCACATTGGGTTAGAGATGGACCTTCTGTTATCATGATGTCTGCGGATGAT  
GGTAAAAGTGTGTTATGAAGGGCGTGAICTCATGGTGCTTGTGATTACTTAATTAAGCCTG  
TTCGCATTGAGGCTTTGAAGAACATATGGCAGCACGTGGTTCGGAAGAGGAAGAATGAGT  
GAAAGATGCCGAGCAATCAGGCAGTGCCGAAGAAGGAGATCGCCATCCAAAGGCTTCT  
GATGAAGCAGATTACTCTTCATCGGCGAATGAAGGCAGTTGGAGAACTCCAAGAAGAGA  
AGGGATGAGGAAGAGGAGGCAGAGGATAGGGATGACACATCCACGTTAAAGAAGCCGC  
GGTGTGTTGGTCTGTGGAGCTCCATCAACAGTTTGTGGCTGCTGTGGATCAACTGGGAAT  
TGACAAGGCTGTTCTAAAAAATTCTGGAATTGATGAATGTTCTGGGCTCACTAGAGAA  
AATGTTGCCAGCCACCTGCAGAAATACCGATTGTATCTTCAAGGTTGAGTGGAGTGTCTC  
AGCACAGAATAACTTGAACAACCTCTTCTCGGCCCCCAAGAGGCAACATTTGGGACAA  
TTTCTTCAATTAATGGGATTGATCTTCAAACCTTTGCAGTCGCTGGCCAGCTCCAGCACA  
AAGTCTAGCCACACTTCAAGCAGCAGGACTTGGTAGGTCGACTGCAAAGCTGGTGTACC  
TATTCCTCTCATGGATCAAAGAAATCTTTTTCAGTTTTGAAAACCCAAGTTAAGATTTGGAG  
AAGGCCAGCCACAACATTTAAGCACTAGTAAACCAATGAACTTGTTCATGGAATCCCTAC  
CAACATGGAACCAAGCAGCTTGCCAATTTGCACCAGTCTACCCAATCCATTGGCGGCTT  
GAATATGCGAGTCAATGCTTCTGCTACACAAGGCAACCCCATATTGATGCAGATGGCACA  
ATCCAACCTAGAGGTCAGATGCTTAGTAAAATACTGGTCTCTCGTGTTCGAAGACTTCCA  
TCATCTTTGGGGCAGCCTACTGTATCAAATGGAATTTCTAATGGTCTTCTGGGCAGAAATG  
GGATTGCGGGTAATAACAGAGGACCTGCATATAATCCTGTTCCACCGAGCTTTCATTGTT  
GAGTTTTCTATGAATCAAACCTCTGAAATGTCTGTCAACAATAGTTTCCCAATTGGAACCA  
CCCAGGTATATCAAGTATCACAACAAAAGGCTCTTTTCAAGAAGAAGTTACATCAGGAAT  
TAAAGGATCCAGTGGGTTTCCAAGTTATGATATTTTAAATGAACTGCATCATCAGAAGTCC  
CATGATTTGGAGATAACAAACCCAGGCTTGACATACAATGCCTCCCATCATGTAAACCTT  
TACAAGGTAACATTGATGTTGCACCATCAGTTTTAGTGCATCAAGGGTTTTCTTCTACACAA  
CAGACCGGCCAAAGCAGAGATGGCGCTTTGATTGAAAAGCTATGTTCTCCATGGGAGAA  
GGCTTGGAAACAAAATAACCTCCAAAATGCTAACTTCAATCCACTTCTGTTGACAATTCAT  
AAGGATCAAGGCTGAAAGAATTCCTGATGCAAGCTCCCAGACTAATCTCTTCCCTGAGCAT  
TATGGGCAGGAGGATCTGATGACTGCACTTCTAAAACAGCAAGAAGGCATGGGACCAGCT  
GAGAATGAGTTTGAATTTGATGGATATTCTCTAGACAACATTCTGTCTAGAACAATCCTT  
TCTGACTGAAGTTGCCAGTGTAAATAGTTTGTACACAAGCACATGATCATCTGCTGTTA  
GCTGTTTTGGAATTGAGTCTAATTGTTCAACAACAGAAATTTGGTTGATGTCAAATATTCAG  
ACTTCTGGGGAGTAGCATATTGTGATGGTTTACTCTGGATGCTCAAGATGAATCAGCTCAA  
ATCTCAACTGCATATATGCATAAAGCATGTGCTATTTTTGACTGCAATTTATAGCAAAATTG  
CTAGCAAGCTTCTAATTTAGGGTGTCTTGAAGGTATGTTGGCTTAGGGCAGAATTGCAG  
AACCAAGGTTTTGATACATCTGCAAAGTTGTCATAGGAGCATTCTAACTTCAATACCAAA  
TTATGAAATTTTTTCTTCTGTTTTTCTTTGTAATTTATTCATTCAAAGTAAGTACCGTAA  
GTTTGTAAATATTGCATTTGTTGTTCTAGACATTTTGTATGGCCATTCTTTTCTGGTTGATT  
CTGTGACTTTCGTTACGCATGTGTTTTTTTTGTTTCATTGTGTTTTTTATTCTCTGTACATAT  
GGTTTAGGCCTTGGCATGTTTGGGGCATATAATTCAAGTACATTCTTTCTGGTTTCTATATA  
AGAACTATACGGTTAGAGATTCTATCAAATTGCA

>GmRR20 (Glyma09g04470.1)

ATGAATCTCAGCCACGGCAAGGGATCCACTTCGAGTTCTCCTCTGAAAGCCGGAGACACC  
GTCTCCGACCAGTTCCCGGCGGGTCTCCGGTACTGGTTGTGGATGATGACCCCACTTGC  
CTTATGATCCTTGAGAGGATGCTGCGTGCTTGTCTCTATGAAGTGACGAAATGCAAGCGAG  
CGGAGGTTGCATTGTCGTTCTGAGAGAGAACAAAATGGGTTTGATATCGTTTTAAGTGA  
TGTGCATATGCCAGATATGGATGGATTTAAGCTTTTGGAGCATATTGGGTTGGAGATGGAC  
CTTCCAGTTATTATGATGTCAGCTGATGATGAAAACAAGTTGTGATGAAAGGGGTGACAC  
ATGGTGCCTGTGATTACCTGATTAACCTGTTCCGATTGAGGCTTTGAAGAATATATGGCA  
GCATGTGGTTCCGATGAGAAAGAATGGTTTGGAGATGTGGAGCAATCTGGTAGCATGGA  
AGAAGGAGATCGGCCTCAAAGGGATCAGATGACGGAAATTAATCGTCTTCCGGTGAATGA  
AGCCAAAAGCTCAAAGAAGAGGAGGATGAGGACGAGGAAGGAGATGAGAGGGATGAT

TCCTCCACGTTGAAGAAGCCGCGAGTTGTTTGGTCTGTTGAGCTTCATCAACAGTTTATGG  
CTGTTGTGAATCAACTTGAATTGATAAGGCTGTTCTAAAAAGATTTTGAATTGATGAAT  
GTTCTGGGCTTACTAGAGAAAATGTTGCTAGCCATCTTCAGAAATACCGTTTGTATCTTAG  
AAGGCTGAGTGGAGTTTCACAGCAGCAGGGTAACCTTGAGCAACTCCTTCATGAGCTCACA  
AGAAGCAACATTTGGGGGAACCTCAATCAATGGAATTGATCTTCAAACCCTTTCAGCTGCT  
GGCCAGTTCATCACAAAGTCTAGCCAAGTTTCAAGCTGCTGGACTTGGCAGGACAAC  
GCCAAAGCAGGTATGCCTATGTCTCTATCCGATCAAAGAACCTTTTCAGTTTTGAGAACC  
CAAGATTAAGATTTGGAGAAGGGTCACTACAACATTTAAGCAACAGTAAGCCAATAAACTT  
GTTTCATGGAATTCTTACCAACATGGAGCCAAAGCAACTTGCCAATTTGCACCAATCTACC  
CAACCCCTTGGTAGCTTGAATATGCGAGTCAATTCTCCTGCCACGCAGAACAACCCCTTGC  
TGATGCAGATGACTCAGTCTCAACCAAGAGGTGAGTTGCTAAGTGAAAATGCCAGTTCTCA  
TGTAACCAGGTATCCGTCATCTTTGGTGCAGCCTACAGTACCAAATGGTATTTCTAGTGGT  
GTTTTGGGAAATGCAATTGCTGGAACCAGCAACATAACTACTACTTATAACCCTGTTCAAC  
AAAACCTCTTATTGTTGAGTTTTCCCATGAACCAACCAATGAAATGTCTGCCAGTAATTC  
CATCTTAGAAGCACTCCAGGTATAACTAGTATCCCAAATAAAGGTATGTTTCATGAAGAAG  
GTACCTCTGGTGTAAAGGATCTGGTGGATTTGTTCAAGGTTATGACATGTTTAATGACCTT  
CACCATCAGAAGTCCCATGATTGGGACTTAACAACACAGGCATGACATATGATGCTTCTC  
AGCATGCAAATCCTTTACAAGGTAACATTGATGTCTCACCATCAGTTTTGGTTCATCAGAGT  
TTTCCCTCTATGCAACAGACTGTACAAAATAGAGATACTACTTCAATTGAAAAGCTATGTT  
CTCCACAGGTGAAGGCATGCATCAGAGTAGTCTCCAAAATATTGGTCAACACCACAATAA  
CCTTCTTCTTGACAATTCAGTAAGGGTTAAGGCTGAAAGAATTCCTGATCCTAGCTGTCAG  
ATTAATAACCTCTTCTCTGACCAATATGGTCAGGAGGATCTTGTGAGTGCATTTCTGAAACA  
GCAAGAAGGCGTTGGAACAGCTGAAAATGAGTTTGACTTTGATGGATATTCCTTAGACAAC  
ATTCCAGTTTGAACAGATTCTGCCCGTTCTTCTCTAATTGCAGTCGCCAATGCAATAGT  
TGGCGTTCCATTTGAACCAAATCGCACTGCAATTAGTTTGTGGATCTTAGTTTAAATTTTT  
CAACAAATAGAATTTAATTGATGTAATAAATTCAGGCTTCAGGGAGTAGTATGTTATTATG  
ATTTAGTCTGGATGCTTAAAAGATGAATAACAACAACTTTAATGCATGTGTGCAAAAGG  
CATATTTGCAATTTTTGGCTGCTTTGTTGTTGCCAAGGTTCTAGCAAGCTTATGTTGTTAAG  
GTGTACATGAAGACACTGGTTTAGGGAAAACCTGTAGAGGGCAAGGCTTTGATACACCTG  
CAGACTTGTAGGAGCATTTTAACTTAATAACACATTATGAAATATTTTTCCCTTGCTCC

>GmRR21 (Glyma07g37220.1)

ATTAATAATTCTGACCCAAAATCCGTCTTCTCTTTCTACTCCGATTCCCTGCGTTGCTTT  
TGGTCTTGGTCAATTGCGAACTCAGCAGCAGAAGAAGTTCCTCAATTGTTTCACCTCAA  
TTCGATTGCAACTATGTAAACGCCACTGTGCGCTCGGGTTTGTGTCTCTGTTTTGTTGCG  
GTGTTACTGTTCCCTCGGTTCCGATCTCCGAAGCATGAATCTCAGCAACGGAAAGGGATCC  
ATGTCAACCCTTACTGCAAGCGTGGTTATGAAATCCGGCGACGCCGTCTCCGACCAGTTTC  
CGGCGGGTCTCCGGTTCTCGTGGTGGACGATGATCCCACGTGTCTCATGATTCTTGAGA  
AGATGCTCCGACAGTGCCTCTACGAAGTTACCAAATGTAATCGAGCAGAAACTGCTCTC  
ACTGCTTAGAGAGACAATAAATGGGTTTGACATTGTTATAAGCGATGTGCATATGCCGGAC  
ATGGATGGATTTAAACTTTTTGGAGCACATTTGGGTTAGAGATGGACCTTCTGTTATAATGA  
TGTCTGCGGATGATGGTAAAAGTGTGTTATGAAGGGTGTGACTCATGGTGTGTTGATTA  
CTTAATTAAGCCTGTTTCGATTGAGGCTTTGAAGAACATATGGCAGCACGTGGTTTCGGAAG  
AGGAAGAATGAGTGGAAAGACGCGGAGCAATCAGGGAGTGCTGAGGAAGGAGATCGGC  
AACCAAAGGCTTCTGACGAAGCAGATTACTTCTCAGCGAATGAAGGCAGTTGGAGAA  
ACTCAAAGAAGAGAAGGGATGAGGAAGAGGAGGCAGAGGATAGAGATGACACATCCACA  
CTAAAGAAGCCACGGGTTGTTTGGTCCGTGGAGCTCCATCAACAGTTTGTGGCTGCTGTG  
GATCAACTGGGAATTGACAAGGCTGTTCTAAAAAATTCTGGAATTGATGAATGTTCTG  
GGTCACTAGAGAAAATGTTGCCAGCCACTGCAGAAATACCGATTGTATCTTCAAGGTT  
GAGTGGAGTTTCTCAGCACCAGAATAACATGAACAACCTTCTCAGCCCCAGGAGGC  
AACATTCGGGACAATTTCTTCAATTAATGGAATTGATCTTCAAACCTTTCAGTTTGCAGTTGCCGGCC  
AGTCCCAGCACAAAGTCTAGCCACACTTCAAGCAGCAGGACTTGGTAGGCCAACTGGAA  
AAGCTGGTGTACCTATGCCTCTCATGGATCAAAGAAACCTTTTCAGTTTTGAAAACCAAG  
GTTAAGATTTGGAGAAGGCCAGCAGCAACATTTAAGCACTAGTAAACCAATGAACTTGTG  
CATGGAATCCCTACCAACATGGAGCCAAAGCAGCTTGCCAATTTGCACCACTACCCAA  
TCCATTGGCAGCTTGAATATGCGAGTCAATGCTTCCGCTACACAAGGCAGCCCTTATTGA  
TGCAGATGGACAATCCCAACCTAGAGGTCAGATGCTAAGTAAAATATTGGTCTCGT



TTCCAAGACTTCCATCATCTTTGGGGCAGCCTACTGTATCAAATGGAATTTCTAATGGTCTT  
CTGGGCAGAAATGGGATTGCTGGTAATAACAGAGGACCTGCATATAATCCTGTTCCACCA  
AGCTCTTCGTTGTTGAGTTTTCCAATGAATCAAACCTCTGAAATGTCTGTCAACAATAGTTT  
TCCCTTTGGAAGCACTCCAGGTATATCCAGTATCACAACAAAAGGCTCATTTC AAGAGGAA  
GTTACATCTGGAATCAAAGGATCTGGTGGATTCCAAGTTATGATATTTTAATGAACTGCA  
CCATCAGAAGCCTCATGATTGGGAGATAACAAACCCAACTTGACTTACAATGCCTCCCA  
GCATGCAAACCCTTTACAAGGTAATATTGATGTCACACCATCAGTTTTAGTGCATCAAGGG  
TTTTCTTCTACACAACAGACTGGTCAAAGCAGAGATGCTGCTTTGATTGGAAAAGCTATGT  
TCTCCATGGGAGAGGGCTTGGAAACAAAATAACTTCCAAAATGCTAGTCAAAACCTCAATTC  
ACTTCTTCTTGACAATTC AATAAGGGTCAAGGCTGAAAGAATTCCTGATGCAAGCTCCCAG  
ACTAATCTCTTCCCTGAGCATTATGGGCAGGAGGATCTAATGAGTGCACCTTCTAAAACAGC  
AAGAAGGCATGGGACCATCTGAGAATGAGTTTGACTTTGATGGATATTCTCTGGACAACAT  
TCCTGTCTAGAACAACCCCTCCCGATTGAAGTTGCCAGTGTAAATAGTTTGTTACACAAG  
CACATGATCATCCTGCAGTTAGCTATTTTGGAACTGAGTCAAATTTGGTTGATGTCAAATA  
TTCAGACTTCTGGGAGTAGTAGTATTGTAATGGTTTAGTCTGGATGCTCAACATGAATC  
AGCTTCAAACCTCAACTGCATATATCCACAAGCATGTGCAAATTTGACTGCTATTTATAG  
CAAATTTGCTAGCAAGCTTCTAATTTTAGGGTGTCTTGAAGGTGTTGGCTTAGGGCAGAA  
TTGCAGAAGCAAGGTTTTGATACATCTGCAAAGTTGTCTAGGAGCATTCTA AACTTGAAT  
AACAAATTATGAAATTTTTTTCTTCTGTTCCTTTTGTAATTTATGTCATTGAAAGCAAGTAAC  
GACTTCCGTAAGCATGTA AATATTGCATTTGGTAGCTTTAGACATCTGGTCTGGTCATTCTT  
TTATGGTTGATTCTGTACTTTCCGATAGATATGCGCTGTTTTTTATGTTCACTGTGTCTTGCA  
TTCTTTGTACATGAACCTGATTATGTGATTTGTGTGAGACTACATAGCTATCCGTTTTATAA  
ATATGCAATATGCTGTAATTAAGGCC

>GmRR22 (Glyma15g15520.1)

ATGAATCTCAGCAACGGCAAGGGATCCACTTCGAGTTCTCCTCTGAAAGCCGGAGATTCT  
GTCTCCGACCAGTTTCCGGCGGGTCTCCGGGTGCTGGTGGTGGATGATGACCCCACTTGC  
CTTATGATCCTTGAGAGGATGCTCCGTGCTTGTCTCTATGAAGTGACGAAATGCCAGCGAG  
CTGAGGTTGCATTGTCTCTTTGAGAGAGAACA AAAACGGGTTTGATATCGTTTTAAGCGA  
TGTGCATATGCCAGATATGGATGGATTTAAGCTTTTGGAGCATATTGGGTTGGAGATGGAC  
CTTCCGGTTATTATGATGTCAGCTGATGATGGGAAACATGTTGTGATGAAAGGGGTGACAC  
ATGGTGCCTGTGATTACCTGATTA AACCTGTTCCGATTGAGGCTTTGAAGAATATATGGCA  
GCATGTGATTCCGAAGAGAAAGAACGGTTT GAGAGATGTGGAGCAATCGGGTAGCGTGG  
AAGAAGGAGATCAGCTCCA AAGGTATCTGATGATGGAGATTACTCGTCTTCTGTGAATGA  
AGCCAGAAGCTCTAAGAAGAGGAGGGACGAGGACGAGGAAGGAGATGAGAAGGATGAT  
TCCTCCACGTTGAAGAAGCCGCGAGTTGTTGGTCTGTTGAGCTTCATCAACAGTTTATGG  
CTGCTGTGAATCAACTTGG AATTGATAAGGCTGTTCC TAAAAAGATTTTGG AATTGATGAA  
TGTTCTGGGCTCACTAGAGAAAATGTTGCTAGCCACCTCCAGAAATACCGTTTGTATCTT  
AGAAGGCTGAGTGGAGTTT CACAGCAGCAGGTA ACTTGAACA ACTCCTTCATGAGCTCA  
CAAGAAGCAACATTTGGGGAACTCAATCAATGGAATTGATCTTCAA ACTCTTTCAGCTG  
CTGGCCAGTTC CATCACAAAGTCTAGCCAAGCTTCAAGCCACGGGACTTGGCAGGACAA  
CTGCTAAAGCTGGTGTGCCTATGCCTCTATCTGATCAAAAAACCTTTT CAGTTTTGAGAAC  
CCAAGATTAAGATTTGGAGAAGGGTCACTACAACATTTAAGCAACAGTAAGCCTATAAACT  
TGCTTCATGGAATTCCAACCAACATGGAGCCAAAACA ACTCGCCAATTTGCACCAATCTAC  
CCAACCCCTTGGTAGCTTGAATATGCGAGTCAATGCTCCTGTCACACAGAACAACCCCTTTG  
TTGATGCAGATGGCTCAGTCTCAACCAAGAGGTCAGATGCTAGGTGAAAATGCTGGTTCT  
CATGTAACCAGGTTTCCGTCATCTTTGGTGCAGCCTACAGTATCAAATGGTATTTCTAATGG  
TGTTTTGGGAAATGGGATTGCTGGCACCAGCAACATAACTACTTATAATCCAGTTCAACAA  
AACTCGTCATTGTTGAGTTTTCCCATGAACCAACA AATGAAATATCTGTCAAGTAATTTCC  
TCTTAGAAGCAGTCCAGGTATAACTAGTATCACA AATAAAGGTATGTTTCATGAAGAAGGT  
ACCTCTGGTATTAAGGACCTGGTGGATTTGTTCAAGGGTATGACATGTTTAATGAACTCC  
ACCATCAGAAGTCCCATGATTGGGACTTAACA AACACTGGCATGACATATGATGCTGCTCA  
CCATGCAAATCCTTTACAAGGTAACATTGATGTCTCACCATCAGTTTTGGTCCATCAGAGTT  
TTCCACCATGCACCAGACTGTACAAAATAGAGATACTACTTCAATTGGAAAAGCTATGTT  
CTCCACAGGTGAAGGCATGCATCAAAGTAATCTCAA AATGTTGGTCAACACCACAATAA  
CCTTCTTCTTGACAATTCAGTAAGGGTTAAGGCTGAAAGAATTCCTGATCCTAGCTGCCAG  
ATTAATAACCTCTTCGCTGATCAATATGGTCAGGAGGATCTTGTCAAGTGCATTTCTGAAAC

AGCAAGAAAGCATTGGAACCTTCTGAAAATGAGTTTGACTTTGATGGATATTCCTTAGACAA  
CATTCCGGTTTAGAACAGATTTCGGCCAGTTCTCTCCTAATTGCAGTCGCCAATGTAAATA  
GTTGGCGTTCCATATGAACCAAATCACACTGCAATTAGTTAGTTTGGATCTTAGTTTAAAAT  
TTTCAACAAATAAAATTTAGTTGATGTAAAAAATTTCAGGCTTCAGGGAGTAGTATGTTATTA  
TGATTTAGTCTGGATGCTCAAAGATCATTAAAGTGATCCATCAAGATGAATAACAACAAC  
TTAAATGCATGTATGCAAAGGCATATTTGCAATTTTTGGCTGCTTTCCATTGCAAAGGT  
TCTAGCAAGCTTCTATTGTTAAGGTGTACATGAAGACATTGGTTAAGGGTAAAAGTGTAGA  
GGGCAAGACTTTGATACACCTGCAGACTTGTGTAGGAGCTTTTTAACTTGAATAACACAT  
TATGAAATATTTTTCTTTGCTCCTTTTTGCTATTTATTTATGCTCTTCTAATTGAGC

>GmRR23 (Glyma11g37480.1)

ATGGATAATGGTTGTTTCTCTTCCCAAGACGTGATTTTCTGCTGGTCTGAGAGTTCTAGT  
TGTGGATGATGATCCAACGTGGCTCAAGATCCTTGAGAAGATGCTCAAAAAGTGCAATTAT  
GAAGTGACTIONCATGTTGTTTAGCAAGGCATGCTCTAAGCTTGCCTCGTGAAAGGAAGGATG  
GATATGATATAGTGATCAGCGATGTAACATGCCCGACATGGATGGTTTTAAACTTCTGA  
GCATGTTGGCTTGAGATGGATCTTCTGTCATTATGATGTCTGTGGATGGGAAACAAGC  
AGGGTGTAGAAAGGTGTTCAACATGGAGCCTGTGATTATCTCCTTAAGCCTATAAGGATGA  
AAGAAGTGAAGAACATATGGCAGCATGTCTTAAGAAAAGGATACATGAGGCCAAAGAAT  
TTGAAAAGCTATCAGATGATGGGAACCTGTTTGCGGTAGAAGATGTTACCTCAACAAGA  
AAAGAAAAGATGCAGATAACAACACGATGACAAAGAATGTTTGGATCCATCATCCACCA  
AGAAAGCTAGAGTAGTCTGGTCTGTGGATCTTCATCAGAAGTTTGTAAAGCGGTGAATCA  
GATTGGATTTGATAAAGTGGGGCCGAAGAAAATACTAGATCTGATGAATGTCCCATGGCT  
GACTAGAGAGAACGTTGCTAGCCACTTGCAGAAATACAGGCTTTATTTGAGTAGGATTCAG  
AAAGAAAACGATCAGAGATCTTCTCAAGTGGATTGAAGCATTTCAGATTTTCTTTAAAAG  
ATATGAGAAGTTTTGGTTTTGAGAACTCAGTAAACAACCAGCAACAAAACGATGTTGCCAT  
TGACAGCTACAATCATTCCGGATGGATCATTACAACCTTCAGAATGTGGAAACTAAAAGTAC  
GAAGCGGATCCCAAGGGAATTGTTTACAGTCCACCATAGCGAAAAAAGGAAGGATTTTG  
ACTGAAGAAAACCATGCAGTATTTGATTGTTCCATGCCAACACCATACACTTGGACTGAAG  
TTCCACACATGCAACTCAAGAAGAACAAGTCAATTGTTTATTAGAAAGATAGCTTCAA  
TCAGTTGCCATTACATGGTAAGCAGCAGCAACACATCCAAGTGGATCAATCACAATCAGTT  
GCTTCAATTAGTTCCGCTCCCTTGATAACGGAGGAAGAGAATGATTATGCCAATTCTGTGA  
GTTCAATAGGGAATGCAGTTGGCACCTTTCTATTCAACCAGGAAGTCTTATTATGAATGT  
AGCATTCTGATCTGGAATTTACCAAAGCAACCTTCTTTTGGGAGGACTTGCATTTCTATT  
GGCTACAAGGTGAATGCTATAATAATGAACCTCAGTCTGCAGAATATAGGAATGTCTGA  
ATATTATGATCCAGGACTTATTTGAGAAGCTCCAACACACTTATATGATTCAGCTGATTACT  
CAGTTATAGATCAAGGTCTATTCATAGCATGA

>GmRR24 (Glyma05g27670.1)

ATGGACAATGGTTGCTTCTCTTCTCCACGCCACGATGCTTTTCCAGCTGGTTTGCAGATTCT  
TGTTGTTGATGATGATCCAACATGGTTGAGGATCCTTGAAAAGATGCTCAAGAAGTGCTTA  
TATGAAAGTACTACATGTTGTTTAGCAACAGAGGCCCTGAAAAAAGTTCGTGAAAGGAAA  
GATGCATATGACATAGTGATCAGCGATGTGAACATGCCTGACATGGATGGTTTCAAACCTC  
TGGAGCAAGTTGGACTTGAGATGGATCTTCTGTTATCATGATGTCTGTTGATGGAGAAAC  
AAGCAGGGTGTAGAAAGGTGTTCAACATGGAGCATGTGATTATCTCCTTAAGCCTATAAG  
GATGAAAGAACTGCGAAACATATGGCAACATGTCTTTAGAAAAAGGATGCATGAGGCAAG  
AGATTTTGAAGTCAAGAGGGTTTTGACTTTGAGGGCATTCACTTAATGAGAAATGGATCA  
GATCACTCTGATGATGGTAACCTGTTTGTGTAGAAAGAAATTACCTCAATTAAGAAAAGAA  
AAGATGCAGATAACAACATGATGACAAAGAATTTGGAGATCATTCTCCCATGAAGAAAG  
CTAGAGTAGTTTGGTCTGTGGATCTTCATCAGAAGTTTGTCAAAGCAGTGAATCAAATTGG  
ATTTGATAAAGTTGGTCCCAAGAAAATTCTAGATCTGATGAATGTTCCGTGGTTGACTAGA  
GAAAATGTTGCTAGTCACTTGCAGAAATACAGGCTCTACTTGAGTAGGTTGCAAAGGAG  
AATGATCAGAAATCTTCTCAAGTGGAAATAAAGCATTCCGATTACCTTCAAAGATCCAG  
GAAGTTTTAGTATTCTAGACACTGCAAACAAGCAACAAAATGATGTTGCCATTGACAGCTT  
CAGTTATTCAGATGGAAGTTTACTACTTCAGATGGATGCCACTAGTCATGAAGGTAATCTC  
AAGGGAATTGTGTCAGAGCCTACAACAGAAAAAAGAAGAGGTTCCACTGGTGACATTCCT  
GACCCCAAGATACAAAAAGTTTACAGAAGAGCCTCAATCAACCTTTTACATCTGTAGAGT  
CATCAGAAGCAAACCATGCAGTCTTTGATTGCACCATACCAACACAGTACTCTTGGAGTGA  
GTTTCCAAAAGGGCCACTCAAAGAAGAACAAGACACTTGTTCATTAAGAGGATAGCCT

CAGCCAGTTGCCATTGCATGGTAATGGTACACAGCATCACATTCACGTTGATCAGTCACAA  
TCAATTGCCTCAATTAATTCCAATCCCTCTATAACAGAAGAAGAGGTTGCTGCCAAATTAG  
AGACCAAACCGTTGTATGCTGGTTACGAGAGTGATTATGTGAGTCCTGTGAGTTCAATAGG  
ATCTGCAGTTGAAGTCTTTCCTAGTCAATCCAAAAGCCTTATGGTGAATGATCAATCTTCAG  
AGCCCACTTTCACCTCAAACCTGAGCTTGAAGGCTCAGGGATTTAATCGAGATTGCATTTT  
TGATCTGGATTTTTACCAAAGAAACCTATTATTGGGTGGTGAGGTAGCTTCTGCACCTTTG  
GAGGAGGACCTGAATTTCTTTTGCTACAACTGAATGCTACAACATGAATTTGGCCTGC  
AGAATATAGATATGTCAGAGTATTATGATCCAAGGCTTATTGCTGAAGTCCCTAGCCACTT  
TTATGATTCAGCAGATTATTCATCAGTAGATCAAAGTCTATTCATAGCATGATTGGTCTTGC  
CCTGCCCTTTTCTGCATCTTCAACAAAATCCAATAATGCACGAAAGGACGATTTACTG  
TTACTATTTGAACTTTTCTTTCTTCGTTTCCAAGAAAATCAACTTTAGGGGGCTGGGGTATT  
CTTTTTTCCAATTAGAAAGGATTTTGATATTTAAGCACAGATAAAAGCGGATGATGTGTGAT  
GACAAACATTAAGCTTATCAATAAGCTTGCTTCTTTAATAATAACTGAATATTTGGAGAAG  
CATTTTCTTGTTGTGTAAGCCCACAGTGGTCTCAGCAAAGAGTTGAAGGTAATTTTATCC  
TTGAAAATGCAAAGTAATGCAACTAAAGATCG

>GmRR25 (Glyma08g10650.1)

ATGCCGAATACTTTGACTACATGTTGTTTAGCAACAGAGGCCCTGAAAAACTTCGTGAAA  
GGAAAGAAGCATATGACATAGTGATCAGCGATGTGAACATGCCTGACATGGATGTTTCA  
AACTTCTGGAGCAAGTAGGACTTGAGATGGATCTTCTGTTATCATGATGTCTGTTGATGG  
AGAAACAAGCAGGGTGATGAAAGGTGTTCAACATGGAGCATGTGATTATCTCCTTAAGCC  
TATAAGGATGAAAGAAGTGCAGAAACATATGGCAACATGTCTTTAGAAAAAGGATGCATGA  
GGCAAGAGATTTTGAAGCCATGAGGGTTTTGACTTTGAGGGCATTCACTTAATGAGAAAT  
GGATCAGATCACTCTGATGATGGTAACCTGTTTGTGTAGAAGAACTACGTCAATTAAGA  
AAAGAAAAGATGCAGATAACAAACATGATGACAAAGAATTTGGAGATCATTTTCCACAA  
AGAAAGCTAGAGTAGTTTGGTCTGTGGATCTTCATCAGAAGTTTGTCAAAGCAGTGAATCA  
AATCGGATTTGATAAAGTTGGTCCCAAGAAAATTCTAGATCTGATGAATGTTCCATGGTTG  
ACTAGAGAAAATGTTGCTAGTCACTTGCAGAAATACAGGCTCTACTTGAGTAGGTTGCAAA  
AGGAAAATGATCAGAAATCTTCATCAAGTGAATAAAGCACTCGGATTCACCTTCGAAAG  
ATCTAGGAAGTTTTAGTTTTCTGAACACTGCAACAAGCAACAAAATGATATTGCCACTGA  
CAGCTTCAGTTATTCAGATGGAACCTTACTAATTCAGATGGATGCTACAAGTTATGAAGGT  
GATCTCAAGGGAATTGTGTCAGAGCCTACAACAGAAAAAGAAGAGCTTCCACTAGTGAA  
ATTCCGGATCCAAAGGTACAAAAAGTTCGCAGAAGAGCCTCAACAAACCTTTTACATCTG  
TAGAGTCATCAGAAGCAAACCATGCAGTCTTTGATTGCACCATACCAACAGAATACTCTTG  
GAGTGAGTTTCCAAAAGGTCCACTCAAAGAAGAACAGAAGACACCTGTTCAATTAGAGGA  
TAGCCTCTGCCAGTTGCCATTGCATGGTACACAGCATCACATTCAGATTGATCAATCACAA  
TCAATTGCCTCAATTAATTCCAATCCCTCTATAACAGAAGAAGAGGTTGCTGCCAAATTAG  
AGACCAAACCTTTGTATGCTGGTTACGAGAGTGATTATGTGAATCCTGTGAGTTCAATAGG  
ATCTGCAGTTGAAGCCTTTGCTAGTCACTTCAAGAAAGCCTTATGGTGAGTGATCAATCTTCA  
GAGCCCACCTTTCACCTCGAATTTGAGCTTGAAGACTCAGGGATTCAATCTAGATTGCATTT  
CTGATCTGGATTTTTTACCAAAGGAACCTATTATTGGGTGGTGAGGTAGCTTCTGCACCTTT  
GGATGAGGACCTGAATTTCTTTTTGCTACAAAGTGAATGCTACAACATGAATTTTGGACTG  
CAGAATATAGATATGTCAGAGTATTATGATCCAAGGCTTACTGCTGAAGTCCCTAGCCACT  
TTTATGATTCAGCAGATTATTCATCGGTAGATCAAAGTCTATTCATTGCATGA

>GmRR26 (Glyma04g06650.1)

ATGACCGTAGAGAAGAAAAGGAATGATTCCGGCGACGAGTTCCCCGTCGGAATGCGTGTT  
CTTGCCGTCGATGATGACCCACTTGCCTCTTGGTTCTGAAAACCTCCTCCAAAGATGTC  
AATATCATGTAACCACGACTAATCAAGCAATAAAGGCGTTGGCTCTGTTGAGAGAACACA  
AAGACAAGTTTACCTGGTAATCAGTGATGTACACATGCCAGACATGGATGGATTTAAGCT  
GCTTGAGCTAGTGGGACTTGAGATGGATCTTCTGTCATAATGTTATCTGCAAATGGTGAT  
ACGAAGATGGTGATGAAGGGGATTTCTCATGGGGCCTGTGATTATCTGCTGAAACCTGTG  
AGAATGGAGGAGCTCAAGAACATTTGGCAGCATGTAATCAGGAGGAAGAAGTTTGAAGTCA  
AAGGAGAAGAACAACCAAGCAACCTAGACAAACCTACTTCTAATAGTGAAATGGACTA  
GGTTCATCAGGAACAGGAAATTTGATCAAATGAGAAGCTGACTAAGAAAAGGAAGGAT  
CAAGATGAAGATGAAGATGAGGATCAGGAGAATGATCTTGACAATGAGGACCCATCAGCC  
CAGAAGAAGCCTCGGGTTGTTTGGTCTGTGGACCTGCACCGCAAGTTTGTGCTGCTGTTA  
ATCAGCTAGGCATTGACAAGGCTGTACCTAAAAAATTCTTGATTTGATGAATGTTGAAAA

GCTTACAAGGGAGAATGTGGCAAGCCATCTTCAGAAGTATAGGCTTTATCTGAAAAGAATT  
AGCTGTGTGGCTAACCAACAAGCCAATATGGTGGCGGCCTTAGGGGTTGCAGATCCATCC  
TATTTGAGAATGAGTTCGGTGAGCGGGGTTGGACATGTACAAACATTAAGTGGTTCGGGA  
CAGCTTCATAACAATAATTTAGATCCTTTCCACCTAGTGGGATAATTAATAGATTGAACAC  
TCTGCTGGTTTGAATGTGCATGGATTTCTTCTGGAGTACTTCAATTGAGTCAATCACAAA  
ATTTAAACAATGCCAATGATCATCATAAATTCCAGTCAGTCATTGTTCCCTGTTAATCAGAAT  
GGTGTTCAGGGAATGACAGTGTCTGTAGGGCTTGATCAACTGCAAAAACAATAAGGTTGTTA  
TGTCTGTTCAGAACCTGACCACTGTTTTGATGCCAAAACAACTTTTCTATCCCAAATAAA  
CTCCCAGATCCAAGACCAAAAATAACCAACTCTGTCTCTCATACTTCAGATGTGCATTTCT  
CAAACAATGCCTTGATGTTGGAACCACGCCCTCAAGGCTCACAAAGGGAGTGTAAAGATTG  
GAACATTATCTTCTTCAGTAGCCTCTCAACATTCGGAATTTTCTTTGTCTTTGCTGGATCAA  
GGTAGATATAGTGATAATTGGACAAGTGTGTGCAGCCATCTGTGATCCAGACAAACTTTT  
TCCCTCCAAGTGAATGTTTTAGACAGACTAATATACCTCCTGCAGATAACATGGCTTCTGT  
ACCCTTGCAAGGTGGGAATCTAAGTGGTCCATCCATCACTTCATTGTCCAGGCAATCCCAT  
GATTAATGACAGAAATGCACCTCTGAAGGAATGACTTTTACTAACAGACCTGGGCATACAA  
GCAGTAATGTGCCATTTCAAGGGTGGGATGACCATAATCAGGATGCTACTCACCATTCAA  
TATTATAAACTTGATTTTTAATTATTGTGATCCCTTACAAATGAAGCATGAAGGGTTTGTGG  
AGTTAACTGATGAGACCTTATTGAAACAACATCAGGGGAATACCATGGACCAGCAAAAAT  
CTCAAGAAAATCATTCTCTAATAATCTTGGTTCACTGGAAGACTTGGTCAGTTCAATGATG  
AAATAGGAGAAAGATAAGATGAAACACTTGATGGAAACCTCATTGCAATAAATACTCTGG  
TGGGTTATCTATGTGGTAGCAGGTTTGGCAGCACATACCAGCATATCATGCACATCCTCGT  
TGATGAATTTTGTAGTTTTTATTGTGTTAACCCTTTTTTCTTCTCATAGTTACTATAGGCTT  
TAGCTTCTCCAGATTACTTTTTCTGGGTAAGTTTTCTAGGTTTGTCCATTAAGGGCTTTC  
TAATTTTATACAAATGCTTTGTTGTCCTTGCCTTCAGGTCCAGCAATGCATTATGAAGTATC  
AATCACTTTGTTAATCTACATAGATATGCTGGCCTGCAAAATTGGACCTAGATCTTCTCTCA  
CAGCCTCACTTGTAGTGAGGAGAGAGAGACAAAAGGTCCAGGTGGAACCCACTTGAACCT  
GTGTCTTCTCACTCCTCGCTGCACTCTGTGTAGCAGATGGGGAGAGATCTGGGGTTGCAA  
ATTTGTAATAATGTTAGGGATCCATAAACAAGATTGTAGTGATTATGATGAATGACAATAA  
ACATGGATGCCCCCTTTTATGCTTGGAATGCCTTTG

>GmRR27 (Glyma17g33230.1)

ATGACCGTGGTGGAGAATCATACAATGGATGATCTCAGAGACCAGTTTCTATTGGAATGC  
GTGTTCTTGCTGTTGATGATGACTCAACATGTCTCATGGTTTTGGAGACTCTGCTTCAAGG  
TGTCATACCATGTAACCACTACTAAAAATGCAATAACGGCATTGAATTTGTTGAGAGAAA  
ACAAAACCATGTTTGACCTGGTAATCAGTGATGTCCACATGCCAGACATGGATGGATTTAA  
GCTGCTGGAGCTTGTGGGGCTTGAGATGGACCTACCTGTCATAATGTTGTCTGTAAATGAT  
GACCCTAAGATGGTGATGAAGGGAATTACACATGGAGCTTGTGATTATCTTCTGAAACCTG  
TTAGAATTGAGGAGCTACAGAACATTTGGCAGCATGTAATCAGGAGGAAAAAGATTGATT  
CAAAGGAGCAGAACAAAACCAGCGACTATGACAAAATAATTCTGATAGTGGTAATGGAA  
GAGGGTCAGCAGCGACAGGAATTCTGATCAAAATGGAAAGCCTTCAAAAAGAGGAAAG  
GATCAGGATGAAGATGATGATGAGGAGAAATGATACTGACCATGACAATGAGGACCCATCA  
ACTCAGAAGAAGCCTCGAGTTGTTTGGTCTGTGGAGCTGCACCGCAAGTTTGTCTGCTG  
TCAATCTATTAGGCATTGACAAGGCTGTACCTAAAAGATTCTTGACTTGATGAATGATGA  
AAAGCTTACAAGGGAGAATGTGGCCAGCCACCTCCAGAAATATAGACTTTATCTGAAAAG  
AATTAGCTGTGGGGCAAACCGACAGGCTAATATGGTGGCAGCCTTAGGTAAGTGCAGATTC  
ATCTTATTTGAGAATGGGTTCTCTGAGTGGCGTTGGACATTTGCAGACATTGACTGGTCCA  
CAACAGTTTCATAACAATGCTTTCAGACCCTTTCCACCTGGTGGAAATGATTGGTAGATTGA  
ACACTTCTGTTGGTCTGAATAATCATGGGTTGTCTTCTTCAGAAGCTCTTCAGTTGAGTCAT  
GCACAAAATTTAAACAACCTCCATAAATGATCCACTTAAGTTCCAATCATCCATAGCTTGTG  
GTAATCAAAATGCTATCCAGGGAATGCCAATGTCTATAGGCCTTGATCAATTGCAACATAA  
TAAGGGTGTTAGTGTTAGTGTGCTCTATTCAAAACATGTCCCCTCTTATTGATGCCAGAC  
CACTTTTTGCTGTGTCAAATAGACTCTCAGATCAAATACCAAAAGTAACAATGGGTTGCTC  
ACCCTCTCCGGTCTTGGACGTCTCAAACAATGCCTTGGTATTGAAAGCAGATAGTAAAAC  
ACACAAGGGAGAGGAGTATATGAGAATTTAACTTCAGTAGCATCTCAGCATTACAATTTT  
CGTTTCTTTGCTGGGTGATGGTAGGTGTAGTGATATTTGGTCAAGTCTATGCGGTCATC  
TGGGACAAATCTTACCCTCCAAGTAAAATTTGCAAGGGGGGAATCTGAGTGGTGTCTC  
ATCAATTAATCACTGTCTAATCAATCCCATGATTCACAGACGGATATGCACTCTCAAGGA

CTCATT TTTTACAAATAATTCAGGACAAATTAGCAATAATGTGCCATTTCTCGGGTGGGATG  
ACCATAATCATGATAGTAGTTACCATTCAAATGTTATTGGTAACTCAATAGACTCTCTGATT  
GATCCAGAAGGTCATACTTCTATTAACCTAACCTACAACAGAACTTGGACTTCAATTTCT  
GTGATCCCTTACAAATGAAGCATGATGGAATTATGGGATTGAGTGACGAAAACCTCATTGAA  
ACAACAACACAGGTACATCATGAACCAGCAGAAGTCTCAAACAGTCGCGCCCCTAATAA  
TATTGGTTCATTGGAAGACTTTGTGAGTTCGATGATGAAACAGAAACAAGACAAGGTGAAA  
TTCTTGGACGGATCATATTTATGCAACAATAATTACCCTGACGGAACATCCATGTGATATG  
AACTTTGGCAGTATATTTGCGCATCATGTCATGCTTTGTTGATGAATTTTGTAGCGTGACAA  
GTCTTGGTTTACCCTCTTCCCAGTTTTGTCTTCTTGGTGGTATTTTCTAGGTCTAGGGTATT  
ATTACTTTTACAGCAAGGGCTTTCTCAATTTGTGAAAATGCGTTGTTTTATGGATGGGGCC  
CTCTAGTGCATTATGGAGTTAACCATGTTTAGTTTTGTGCAGACATGCTTTTCTAGCAATTT  
GTTAGTGGTCCATAAGCAAGAATAAAATAATTTTAGTGGCAATAAACTCGGGGTCTTCCCT  
TTATGAATGCAAATAATGGCCGACGAAATAGCATTATG

>GmRR28 (Glyma14g13320.1)

ATGGATGATCTCAGAGACCAGTTCCCTATTGGAATGCGTGTTCTTGCTGTTGATGATGACT  
CAACATGTCTCATGGTTCTGGAGACTCTGCTTAGAAGATGTCAATACCATGTAACCACTAC  
TAAAAATGCAATAACGGCATTGAAGTTGTTGAGAGAAAACAAAACCATGTTTGACCTGGTA  
ATCAGTGATGTCCACATGCCAGACATGGATGGATTTAAGCTGCTTGAGCTTGTGGGGCTTG  
AGATGGACCTACCAGTCATAATGTTGTCTGTAATGATGACCCTAAGATGGTGTGATGAAGG  
GAATTACACATGGAGCTTGTGATTATCTTCTGAAACCTGTTAGAATTGAGGAGCTACAGAA  
CATTTGGCAGCATGTAATCAGGAGGAAGAAGATCGATTCAAAGGAGCGGAACAAAACCA  
GTGACCATGACAAACCTAATGCTGATAATGGCAATGGAAGAGTGTGAGCAGGAACAGGAA  
ATTCAGATCAAATGGAAAGCCTTCCAAAAGAGGAAAGATCAGGATGAAGATGATGAGG  
AGGAGAACGAGGATGGCCATGACAATGAGGACTCATCAACTCTGAAGAAGCCTCGAGTT  
GTTTGGTCTGTGGAGCTGCACCGCAAGTTTGTCTGCTGTTAATCAACTAGGCATTGACA  
AGGCTGTACCTAAAAGATTCTTACTTGTGATGAATGTTGAAAAGCTTACAAGGGAGAATGT  
GGCCAGCCACCTCCAGAAATATAGGCTTTATCTGAAAAGAATTAGCTGTGTGGCGAACCG  
ACAGGCTAATCTGGTGGCAGCCTTAGGCACTGCAGATTCATCTTATTTGAGAATGGGTTCT  
CTGAGTGGGGTTGGACATATGCAGACATTGACTGGTCCTCAACAGTTTCATAACAATGCTT  
TCAGACCCTTCCACCTGGTGAATGATTGGTAGATTGAATGCTTCTGTTGGTCTGAATAT  
GCATGGGATATCTTCTCAGAAGCTCTCAGTTGAGTCATGCACAAAATTTAAACAAATCC  
ATAAATGATCCACTTAAGTTCCAATCAGCCATAGCTTGTGGTAATCAAATGGTATCCAGG  
GAATGCCAATGTCTATAGGCCTTGATCAATTGCAACATAATAAGGGTGTAGTGTGGTCC  
TATTCAAAACATGTCTCCCTAATTGATGATAGACCAACTTTTGGCGTGTCAAAGAACTCT  
CAGATCAAACACAAAAGTAACAATTGGTTGCTCACCTCTCCGGTTTTGGACATCTCAA  
CAATGACTTGGTATTGAAAGCAGATAGTAAAACACACAAGGGGGCGGAGTATATGAGAA  
TTAACTTCAGTAGCCTCTCAGCATTCCCAATTTTCTCTCCCTTTGTTGGATCATGGTAGGT  
GTAGTGATATTTGGTCAAGTCTATGCAGTCAATCTGGGACAAATTTACCCTCAAAGTGA  
AACTTTGCAAGGGGGAATCTGAGTGGTCAATCATCCATTACTTCACTGTTAATCAATCC  
CATGATTCACCGACAGATATGCACTCTCAAGGACTCATTTTTACAAATAACTTGGGACAAA  
TGAGCAATAATGTGCCATTTCAAGGCTGGGATGACAATAATCATGATAGTAATTACGATGC  
AAATGTTATTGGTAATTCAATAGACTCTGATTGATCCAGAAGGCCATACTTCTATCAACT  
CAAATAATAGAAATCTGGACTTCAATTTCTGTAATCCCTTACAGATGAAGCATGATGG  
AATTATGGGATTGAGTGAAGAAAACCTATTGAAACAACAATATGGGTACATCATGAACCG  
GCAGAAGTCTCAAACAGTAGTGCCACTAATAATCTTGGTTCATTGGAAGACTTTGCCAGT  
TCAATGATGAAACAGGCAACATACTCTGTATGGAGGGCCTGCTAA

>GmRR29 (Glyma15g24770.1)

GGTGGAAAAAGTGAAGGACAAATAACAGAGCAGAGAGAGAGATTTCACTAAAATACTAAA  
AGATTTTATGGTTTTGTTTTGCTGGCTTCAAATCCATCACTGTCCATTCTGTACAGGCTTCGT  
GACCTTGTCCAGTTCTACATTTTTTTTTCTTCTCCCTTTATCTCTTGGCCTTTTTGTTGTTGG  
TGAAAGAGAAGCCTTGAGAACAAATTTCCCGTTTTCAAATTTGGAGCTTTTGGGTCTCTGA  
GGTTTGATCTCTGCACAAGAACCTTGTCTCATCTGGGTGTGTTGCTTTTGCCTCTGCTG  
GCTCGACATGGCTGTGGAAAACAAAGGGAAGATGAGGGCTGTGACCGTTTTCTGTGGG  
TATGCGTGTCTTGTGTGGATGACGACCAATTTGCCTGAAGGTGTTAGAGAATCTCCTT  
CGCAAATGCCAGTATCATGTTACTACAATAATCAGGCAGTTGAAGCGCTGAAAATGTTGA  
GGAAAACAGAAATAAGTTTGACCTTGTATCAGCGATGTGAATATGCCTGACATTGATGG

ATTTAAGCTCCTTGAGTTGGTGGGACTTGAATGGACCTACCTGTCATCATGTTGTCAGCA  
CATGGTGATACAAAGCTGGTGTGAAGGGTGTACACATGGTGCATGTGACTATTTGCTG  
AAACCTGTTTGAATTGAAGAGCTGAAGAACATATGGCAACATGTAGTTTGAAGAAAGAAT  
TTTGACAGCAGGGATCAGAACAGGCTTCCAATGAGGAGAAGGCTCCCAATATTGCTGGG  
GAAGGTAGTCAAGGCTACGATCAGAAAACAGTGCTGACCAGAATAAAAGGCTTGGTAAA  
AAAAGGAAGGACCAAGTGAGGAGGAAGAAGAAGATGGGGAAGAGAATGGAGATGATG  
AGGACCCCTCAGCACAGAAGAAACCTCGTGTAGTTTGGTCTGTTGAGCTGCATAGAAAAT  
TTGTTGCTGCAGTTAATCAACTGGGCTAGATAAAGGCTGTTTCTAAGAAAATACTTGACCT  
GATGAATGTTGAAGGGCTTACAAGGGAATAATGTTGCAAGCCATCTACAGAAATATAGACT  
CTATCTGAAAAAGGCAGCCAGCAAGCTAACATGGTTGCTGCATTGGGTGGTAGTGATTC  
TTACCTACGTATGGGTTCAATAGATGGATATGGAGATTTTGCACCTCGTCTGGGTCTGGA  
AGGATCACAAACACTACTTCACCATCATATGCATCTACGGGAATTTTTCAGTAGGCTGAATT  
CTCCAGCTGCCTTGAACATGAGAGCAATTAGTTCTTCTGCGCTTATCCGGCCTGTTGAGTC  
TCAAAACATCAACTGCTCCTTAAACACACTTGGAAACATTGAGCCATCTGTTTTCTGCAA  
ATCATAGCTGAAGTTTATTACAGGGAATCCGACATCAATTGAGCTTAACCAATCAAGCA  
AAGCAACTGTACAACCTGGAATATCACAGTTAAGTCAAGTTGATTCAAGTGGATTTGCAAGT  
GCCTCTGGGTTCCAGACAGTAGGGCTACTGTTAATGGTCCAACAATTCTCTACCGTGTG  
TCTCAAATAATCATATAATGTTACAAGGAAATCCACAACAATGCATGGCCAGGAGCATT  
TAGAAATCAGTCTTCTGTTAGAGCGGCTTCTTTGTGTGCAGAATCTTTGACGCGGGCTTAT  
GTAGTTCTTCTAATTTGTTAGATTATAATCGGTGCAATGAAAACCTGGCAGAATGCCGCTCA  
ATTGTCTAAATTTCTGCCACTCCTTGCCACTTTGTGAGGCTTTCAGCAATGACCAACTGC  
CTCCACTAGAATTAATGTTTCCAACCTCAAGAACTCATATTGTCAACAGTCCAGTTGATTTT  
TCTTCTAGAATGGGAATTTCTGTTCTTTGGAGGACACCAGAAATGAGCTGGCATGCCAAG  
AGGGCTTGATTGGGAATATTGTAAGCCTTCAAGTTACACACCACAACAAGGTGGGAAG  
AACATAAACTGGATTATAACCAAAACGTGGGTGATTCTTTAATCCTGTAATTCACATGCT  
TCTTCCAGTGGAGTAAAAGTTCTATGGGGCATGGTTTAAACCAAAATAATACAATTTGTA  
GCAATAGAGTTGATGCATCTTTGGTTGGCCAACTAAATGGAGCATCCCATCAATCAGCAG  
GTGCACTGAAGTTGAGAAATTCTTTCAGACATTGACTGAAGCCAAATGAAGCCTACATT  
TTGGAGCAAATGAAGTCCAAGATGGATTTATGCAGAATACTTTGGGACCTTGGATGACA  
TAATGGGTGCAATGGTCAAAAGGGAGCAAATGAGTTGACATTGTTGGATGGAGAAATGG  
GATTTGATGCCTACCCTGTTGGATCATGCAACTGATTTCTTCTTATTGAGCAAGAATCCAGG  
AGCATTAAAATCGTGGAACCTGCTCCTGTCCCCGGAGCCGAGTGATTGTGTAGTAGTTTCT  
TTGATGTACAATTATTATTATGTTCTGCTACTAAATTTACTTTATTGGCCAACATTTTGTGTT  
ATACTTATGGACTTTTGTAGCCATCTGATCCGTTCCATCTTTTTTTTTTCAATCTTGTAGT  
GTATCCCCATAAAAAAATTTCTGTCTATGGTTTAGATAAAAATAATTGTAATATGAATGCTTC  
TTGGTGCTC

>GmRR30 (Glyma09g14650.1)

GTTTTGCTGGCTTCAAATCCATCACTGTCCATTTTGTACAGGTTTCGTGACCTTGTCCGTT  
CCACATTTTTCTTCTCCCTTTTCTTGCCCTTTTTGTTGTTGGTGAAGAGTGCCCTAGAG  
AACAAAGTTCCTGTTTTCAAATGAAGCTTTTGGGTCTCTGAGGTTTGTCTCTGCACAAG  
AACCTTGTTTTCTCATCTGGGTGTGTTGCTTTTGCCTCTGCTGGCTCGATATGGCTGTGGAA  
AACCAAGGGAAGATGGGGTGTGATCGTTTTCTGTGGGTATGCGTGTTCTTGCTGTG  
ATGACGACCCAATTTGCCTCAAGGTGTTGGAGAATCTCCTTCGCAAATGCCAGTATCATGT  
TACTACAATAATCAGGCAGTTGAGGCACTGACAATGTTGAGGGAAAACAGAAATAAGTT  
TGACCTCGTTATCAGCGATGTGAATATGCCTGACATTGATGGATTTAAGCTCCTTGAGTTG  
GTGGGACTTGAATGGACCTACCTGTCATCATGTTGTCAGCACACGGTGATACAAAGCTG  
GTGATGAAGGGTGTACACATGGTGCATGTGACTATTTGCTGAAACCTGTTTGAATTGAAG  
AGTTGAAGAACATATGGCAACATGTGGTTTGAAGAAAGAATTTTGTAGCAGGGATCAGA  
ACAAGGCTTCCAATGAGGAGAAGGCTCCTAATTTTGTGGGGGAGGTAGTCAAGGCCTAA  
GATCAGAAAACAGTGTGACCAGAATAAAAGGCTTGGTAAAAAAGGAAGGACCAAAGT  
GATGAAGAAGAAGAAGGTGGGGAAGAGAATGAAGATGATGAGGACCCCTCAGCACAGAA  
GAAAGCTCGTGTGTTTGGTCTGTTGAGCTGCATAGAAAATTTGTTGCTGCAGTTAATCAA  
CTGGGCTAGATAAAGGCTGTTCCAAGAAAATACTTGACCTAATGAATGTTGAAGGGCTTA  
CAAGGGAAAATGTGGCAAGCCATCTACAGAAATATAGACTCTATCTGAAAAAGGCAGCC  
AGCAAGCTAACATGGTTGCTGCATTGGGTGGTAGTGATTCTTACCTACGTATAGGTTCAAT  
AGATGGATATGGAGATTTTGCACCTCATCTGGGTCTGGAAGGATTACAAACGCTACATTA

CCATCATATGCATCTACTGGAATTTTCAGTAGGCTGAATTCTCCAGCTGCCTTGAACATGA  
GAGGAATTAGTTCTTCTGCACTTATCCGGCCTGTTTCAGTCTCAAACATCAACAGCTCCTT  
AAACACACTTGGAAACATTGAGCCATCCATTTTCTGCAAATCAAAGCTCAAGTTTATTAC  
AAGGAATTCCAACATCAATTGAGCTTAACCAATCTAAGCAAAGAACTGTACAACCTGGAAT  
ATCACAGTTAAGCCAAGTTGATTCAAGTGGATTACAGTTGCCTCTGGCTTCCCAGACCAT  
AGGGCTACTGTTAATGGTCCAAACAATTCTCTCCCGTGTGTCTCAAATAATCATATAATGTT  
ACAAGGAAATCCACAAACGCATGGCCAGGAGCGTTTAGCAATCAGTCTTCTGTGAGAGC  
GGCTTCTTTGTGTGCTGAATCTTTGACGTGGGCTTATGTGGTTCTTCTAATTTGTTGGATC  
ATAATCGGTGCAATGATAACTGGCAGAATGCAGCTCAATTGTCTAAATTTCTGCCAATTC  
CTTGCCACTTTGTGAGGCTTTCAGCAATGACCAACTGCCTCCCCTAGCATCAATGATTG  
AACTCAAGTACTCATATTGGCAACAACAGTCCAGTTGATTTTTCTTAGGATGGGAATTC  
TGTTCTTTGGAGGACACCAGAAATGAGCTGAGATGCCAAGAGGGCTTGATTGGGAATAT  
TGTACAGCCTTCAAGTTACACACCACGACAAAGGTGGGAAGAACAATAAACTGGATTATAA  
CCAAAACATGAGCTGTCCCTTAATTCTGTAATTCACACGCTTCCCTCCAGTGGAGTGACA  
AGTTCTATGGGCATGTTTTAAACCAAAATAACAATTTGCAGCAATAGAGTTGATGCAT  
CATCTTTGGTTGGCCAACTAAATGGAGCATCCCCATCAATCAGCCGGTGCCTGAAGTTGA  
GAAATTCTTTCAGACATTGCACTGAAGCCAAATGAAGCCTACATTTTGGAGCAAATGAAG  
TCCAAGATGGATTTATGCAGAATACTTTGGGACCTTGGATGACATAATGGGTGTAATGG  
TCAAAGGGAGCAAATGAGTCGACATTGTTGGATGGAGAAATGGGATTTGATGCCTACC  
CTGTTGGATCATGCAACTGATTTCTTCTTAACCAGAACGAATCCAGGAGCAATAAAATCGT  
GAACTTGCTCCAGTCTCTGAAACCGATTAATGTACACCTATTTTTATGTTCTGCTACTAAA  
TTTATTTTCTGGCCAACATTTTGTGTTTCACTTATGGACTTTTGTAGCCATCTGATCTGTT  
CCATCTTTTTTCTTTCAATCTGTAGTGTATCCCCATAAAAATTGTCTTTGGTTTAGATAAA  
ATAATTGTAATATGAATGTTTCTTGGTGCTCTTTCTTTCTTTGG

>GmRR31 (Glyma06g06730.1)

ACTATTTTTCTCACAAAATAAACAAAAAATCTTTCCTTATTGTTTTCCGTGTTTCCTT  
TGTTTCATAGCTTCTGGGTTTTGGTTTTGAGACCCACAATACAAAGTTCACAAGTGTGTGTA  
AAGATTGAAGAAGAAAATGACCGTAGAGAAGAAAATGAATGATTCCGGCGACGAGTTTCC  
CGTCGGAATGCGTGTCTCGCCGTCGACGATGATCCCACTTGCTTATTGTTCTGGAACT  
CTCCTCCGAAGATGTCAATATCATGCAACCACGACTAATCAAGCAATAAAGGCGTTGGCG  
CTGTTGAGAGAACACAAAGACAAGTTTACCTGGTAATTAGTGATGTGCACATGCCAGAC  
ATGGATGGATTTAAGCTGCTTGGAGCTAGTGGGACTTGGAGATGGATCTTCTGTGATAATGT  
TATCTGCAAAATGGTGATACGAAGCTGGTGATGAAGGGGATTTCTCATGGGGCCTGTGATTA  
TCTGCTGAAACCTGTAAGAATGGAGGAGCTCAAGAACATTTGGCAGCATGTAATCAGGAG  
GAAGAAGTTTACTCAAAGGAGAAGAACAACCCGCAACATAGACAAACCTACTTCAA  
CAGTAGCAATGGACTAGGGTCATCAGGAACAGGAAATCTGATCACAATGAGAAGCTGAC  
TAAGAAAAGGAAGGATCAAGATGAAGACGAAGATGAGGAGCAGGAGAATGATCATGACA  
ATGACTGCCATCAGCCCAGAAGAAGCCTCGGGTTTGGTCTGTGGAGCTGCACCCGA  
AATTTGTTGCTGCCGTTAATCAGCTAGGCAATGACAAGGCTGTACCTAAAAAATCTCGA  
TTTGATGAATGTTGAAAAGCTTACAAGGGAGAATAAGTATAGGCTTTATCTGAAAAGAATT  
AGCTGTGTGGCTAACCAACAACCAATATGGTGGTGGCCTTAGGGGGTGCCGATCCATCC  
TATTTGAGAATGAATTCTGTGAGCGGGTGGACATATAACAATCAATAAGTGGTTCTGGAC  
AGCTTCATAACAATGCTTTCAGATCCTTCCACCTAGTGGGATAATTAATAGATTGAATACT  
CCTGCTGGTTAAATGTGCATGGATTTCTTCTGGAGTACTTCAATTGAGTCAATCACAAA  
TTTAAAAACACCAATGATAATCTTAAGTTCCAGTCAGCCATTGTTCTGCTAATCAGAATG  
GTGTTTCAATGGAATGACAGTATCTGTAGGGCTTGTCAACTGCAAACAATAAGGGTGTAT  
GTCTGTTCAAACCTGACTACTGTTTTGATGCCAAAACAATTTTCCATCTCGAATAAAC  
TCCAGATCCAAGACCAAAAATAACCAACTCTGGCTCTCACACTCCAGATGTGAGTTTCTC  
AAACAATGCCTTGATGTTGGAACCACGCCCTCAAGGCACACAAGGGAGTGAAGAATTGA  
AACTTTATCTTCTCAGTAGCCTCTCAACATTCAGAATTTCTTTGTCTTTGCTGGATCAAGG  
TAGATATAGTGATAATTGGGCAAGTACTGTGCAGCCATCTGTGATCCAGACAACTCTTAC  
CCTCCAAGTGAATGTTTTGGACAGACTAATATACCTCCTACAGATAACATGGCTTCTGTAC  
CCTTGAAGGTGGGAATCTAAGTGGTGCCTCATCACTTCACTGTCCAGGCAATCCTATGA  
TTCAATGACAGATATGCACTCTGAAGGAGTGACTTTTACCAACAGACCTGGGCATATAAGC  
AGTAATGTGCCATATCAAGGGTGGCATGACAATAATCAGGATGCTACTCACCATTCAAATA  
TTTTGTCAATAAACTCACTGACTCCAGTCAATGGTGCTGCTGTTCCAGCTGGCCATGCAGC

AATGAACTCAGCCTTACACAGAACTTGGACTTTAATTATTGTGATCCCTTACAAATGAAG  
CATGAGGGATTTGTGGAGTAACTGACGAGGCCTTATCGAAACAACATCAGGGGAATATC  
ATGAACCTACCGAAATCTCAACAAAGTCATTTCTCTAATAATCTTGGTTCCTGGAAGACTT  
GGTCAGTTCAATGATGAAACAGGAAAATGATAAGATGAAATTATTGGATGGAAACCTCATT  
TGCAATAATTACTCTGGTGGGTTATCTCGATGTGATAGCAGGTTTAGCAGCACATTCCAGA  
ATATCATGCATCCTCGCTGATGAATTTTTTTGTAGTTTTTCATCGTGTTTTAAGGGCTTTAGCT  
TTTGTCTTCTCGTAGTTACTATAGGATTTAGCTTCTCCAGATTACTTTGTTCTCTAGGTTTTGT  
TCCACTAAGGGCTTTCTATTTTTTAACAAATGCATTGTTGTCCTTGCCTTGAGTCCAGCAA  
TGCAATATGGAGTGTTATTGATCACTTTGTTAATCTCCTTAGATATGTTGGCCTTCAAATTG  
GACCTAGATCTTCTGTCACAGCCACACTTGCAGCGAGGAGAGACACAAGGTCCTGGTG  
GAGCCCATCACAAATGGGATCCACTTGAACCCTGTGTCTTTTTTCATGCCTTGATGCTTG  
GTGTAGGTGTGGCAGCTTGAGAGAGATCAGGGATTGCAAATTTAAATGTTAGGGATCCAT  
AAACAAGATTATAGTGATTAAGTTGAATGACAATAAACACGAATCCCCCTTTTATGCTTG  
GAAATGTTGTCTATTAATAATTACACATTCAATATT

>GmRR32 (Glyma13g22320.1)

TGGCCGCAGACAGAGAGAAAGACACTTTCACTGAAATTCTAAAAGAATAAAAGATTTGTG  
TTTTGTATTTTTATGTTGAATTGAATCCCTCGTTGTTTTTTGTGAGTCACTGTCATAGTCCAA  
TTTGTGCTGTTGGTTTTGTAACCCTCCTTCTCCAGCCTTTTTCTTGAGTTTTCTATCTCTCTC  
TCACTCCTTTTTAAATTTTAATAATTTGTTGTCTGTTGCGTGAAAGAGGCCCTGAAAACAA  
GGTTTCTGCTGTCAAGTTTGTAGCTTTTTGCTCTGTGATTGGTGTGTTCTCAAATAATGCTT  
CATTCTCATCTGGGTAAGTTCTTGTGTTAAGATGGTGGTGGGTGACCGTTTTCCGGTGG  
GTATGCGTGTACTTGCCGTTGATGACGACAAAACGTGTCTCACAGTTTTGGAGAACCTGCT  
TCGCAAATGCCAGTATAATGTCACTACAATAATCAGGCAATTAAGGCGCTAGAAATGTTG  
AGGAAAAACAGAAACAAGTTTGACCTTGTATTAGCGATGTAATATGCCTGACATGGATG  
GGTTAAACTTCTTGAGCTAGTGGGACTTCAAATGGACCTACCTGTTATTATGTTGTCAGG  
ATACGGTGATAAAGAGCGGGTGTGAGAGGTGTTATACAGGGTGCTTGTGACTACTTAAC  
CAAACCAGTTCGAATTGAAGAGTTACAGAACATATGGCAACATGTACTGCGAAGGAGGAT  
TGATAGCAAGGATAAGAATAAGACTGCAAGTGAGGGAAAAGGCTGCAGTATGGCTGGTA  
AGAAGGAACTAAGTGAGGATGAGGAAGAGGAAGAATATGATAAAGAGAATGAGGAACAC  
TCAAATCAGAAGAAGCCTCGTTTAGTTGGGATGCCGAGTTGCATAGGAAATTTCTTGCTG  
CTGTTAATCATCTGGGAATTGACAAGGCTTTCCCAAGAGAATACTCGACTTGATGAATGT  
CGAAGGACTTACAAGAGAAAACGTAGCAAGCCATCTGCAGAAATACAGACTCGGTCTCAG  
AAAACCTACTCAGCAGCCTAGCATGGTTGCTGCGTTGGGTAGTAGTGATCCTTACCTGCAG  
ATGGATTCAGTAGAAGGCTTTCGCACTTTGTGCGGATCAGTAGGAATGTTAAGCACCACAC  
TACCATCATATGCATCTGGTGGAGTGTGTTGTAGGCTGAACCCACCATCTGGCTTGAGAGG  
AGTTAACTCTGCACTTTTTCAGCCTGTTCTGTCTCAAACAATAGCATGTCTGCAAAAAGCAT  
TTGGAACATGCAACTGTCCATGTTTTCTGCAAATCAAACCTCAAGTTTATTACAGGGCATT  
CCAACATCAATAGATGCTAATAAATTTCAAGGAGAACCGTTACCTGATAGGAAAGTTGA  
GTCCACTTGATGATTCAGTGGATTTAAAGTTTCTCTGTTTTCTCAGACACTAGAGCTACC  
GTTATAAATCCAAATAATTTTTGTGATGATCTCTCAAATAATCATTACTTTTACAAAGAAAT  
TCACCACCAGCACAGAATTCGGGAGCATTAGAAATCACTCTTCTCTTGGAGCTGCGTCG  
GTGAACACACAATCATTTGACCCTGGTATCTGTGAATTGGATCATAATCGGCATAATAAAA  
GCTGGCAGGGAACAACCTCAGATATCTAAGTTTCTACCAATACTTCTGCTGTCAGTAAGGT  
TTTCACTCATGATCAGCTGGCTCAAATAAATTTAAATTTTCTCATCCACTTTTTGCAAGT  
GGAACAGTCCAGTTGATTTTTCTTCCACTAGGGCTATTGCTCCTCCCTTGGAGGATGCTAG  
AGATAAGCGGGGTTGCAACAAGACATGAGCCAAACCTTCACTCCACAAAGTCTGTCTC  
TCCTAATGGAGACACTAGTTCCTTAGGACATAGTTTAGACCAAATAAATTCAGTTAGCAGC  
GAGGGAATTGGTGCATCTTTGGTTAATCCATCAATCACACAATCAAATGAAGGTGAGAAAT  
TCTATTCGATGAAGTCAAATGATGCCTGCATTTTTCGGGAGCATGGAGTCCCAAGAAGGACT  
CATGCAGAATACTTTTGGGTCCTTAAATGACATAATGAGTGAAATAACCGAACAGGAGCA  
AAATACGATTATGCTGATGGATGGAGAATTGGAGTTTGATTTGGATCATGATTTGATTCCT  
TCTGA

>GmRR33 (Glyma07g26890.1)

AAATCTTGCTTCTCCATCACTCAAACCTCAAACCTCCCTCCCTCACTTCTTCTCCTCGATCCA  
CAGCGTTTTAAAACCTCAAACCAAAACCATCTTCCGGGGTCACTTTCTTCTCCTTAGGG  
TTGTGTTTGTGTTTTGACTGCGCGTTTTGATTCTCGGCTATGCTCACTCTCCGACATTGT



GTTGCGCTTCTCCGACTCTGAATTCTCGCGAAAACGACGTCGTTGCGTTGCTTTCCGGTGGC  
GGCCATGGCTCCTGCTGCGGCGGAGTTTCCGGTGGGTCTCCGGTCTGGTGGTTCGACGA  
CGACGCCACCACGTTGAAGATTATCGAGCAAATGTCTATTCGCTGCCGTTACCGTGTACC  
ACATGCACTGAGGCTACTGTGGCTTTGAATCTTCTGCGGGAGAGGAAAGGTTGTTTTGATG  
TGGTGTGAGTGATGTTTCATATGCCAGACATGGATGGCTATAAACTCCTTGAACATGTTGG  
GCTGGAAATGGACCTTCTGTAATTATGATGTCTGGTGTAGTACTACAAGTGCTGTCATG  
AAGGGAATCAGACATGGGGCTTGTGATTATTTGATTAAGCCTGTACGTGAGGAAGAATA  
AGGAATATATGGCAGCATGTTGTTAGGAAATCTGGAATGACAGCAAAGAAGCAGGATAAT  
TCTGGCAGCATGGAAGATAGTGATCAAATAAACGGGGGAATGATGATGCTGAATATACT  
TCTGTTGCTGACGCAGCAGTAGTTAAAGCACCAAAAAGAGGAGCAGTTTAAAAGAAGAA  
GATATTGAATTAGAGAGTGATGATCCAGCTGCATCTAAGAAGCCCCGTGTAGTGTGGTCTG  
TGGAAGTGCATCAACAATTTGTCAGTGCAGTGAATCAACTTGGGCTTGACAAGGCTGTGCC  
AAAGAGAATACTTGAATTGATGAATGTCCCTGGTTTGACAAGAGAAAATGTTGCAAGTCAT  
TTGCAGAAATTTAGACTTTATTTGAAGCGATTAACCTGGAGTGGCACAGCAACAAGATGGGA  
TGCTAAACACAGTTCTGGCCCTATAGAATCCAATCTGGGAATTAATGGAAGATTTGACGT  
ACAAGCTTTGGCTGTGCTGGCCATGTTCCCTGAAACACTTGCAGCCATTCATGCTGAG  
CTCTTAGGTCACCCGACAAATAACATAATGTCTACAGTGGACCAAACCTACTACTGCAAG  
CATCAATACAGGGGCTAAAACATTCCCATGCTGGACATGCTGTGGCATATGGTCAGCCTCT  
TGTAAGTGTCTTTCGAACATTGGCAAGAATTTCTCTCCATCTATCTTACTGTAAATGATA  
CGTCATCAGGATATGGTGCATGGCTGTCTAATAACAATTGTTTACTGAGACCCAA  
TAATAGTGTGAAAGGGTGGGTATTCAGAATAACAACATGCTGATATTAGAGCACCAACAA  
AGGCAGCAGCCCCAGCAAAAACAACAGCAGCAACAGCAAAAGCAACAGCAACAGCTGCA  
GCAGCAGTCATTGATACATGATCGAAGTTGTTCAATCAATGTTCAACCATCTTGCCTGGT  
GTTCCCTCTCAATCCTCTGAAACTTTCCAGGCAATAAATAGTCTGCTTCTGTCAATCAGGA  
TTGCAGTTTTGCCTGGAATGCCATTATTGATTATAGTCTATTGCCACAAAATCAAATAATT  
CATTTAGTGCATCTCAATTCCTGGTGGGGACACAAAAGCTCGAGGTGTTCTCTATGGGTA  
TACGACACCCTCTTCTGTTCAACAAGCTCCAGCAATGGCAATATAACAACAGCTTCAAAC  
TCCACTTTAACATTTGGTGCTGCAAGACCTTTGCCTAGCCTTTGCCCATGACTGACAGAA  
AAGATCCCTATGGTTTTAAATCGGGTGATTTACTTGATCAAGTATGCTTTAGGAATCTTGGG  
TTTGTGGCAAAGATAGCTGCATTCCAAGTAGTTTTGTAGAAAATGAAATTGAGTCATCTG  
TAAGTGATTTTACCAAATGAAAGTTAATGTAGATATCAGTGGCAACAGACAGAAGGAGG  
AGCCAAATATTCCAAAAGTGAGCCACCCTATCATAGAAAGATATCCATCTCGTGATCATT  
AAGTGTGTTGCTGAATAGGTAAGGTGATGGCTATTTCTTTGAGTGTTATGTTTTATAAGAT  
TGTGAATATTAGTTAACTACATGGTGTAGTATGAACATTATGATTATTGGGGCTTATT  
GTAAGTATAATGAAGATCATATCTTAACTGTTAATAAATTTCTTCTATGATAAAAATTG  
AAGAGTTATTTAGCTATTTTCAACCATTGTATGTGTTGTTCTTCTGCACAAGTTGTCTACT  
TGTAATAATCTAACTTCTAAAT

>GmRR34 (Glyma03g32720.1)

TTTTCACTTCCACCTCCTACTCATAATAGTGAATTTAGTCTCAGAATTTGAGAAAGAGTTC  
TCATTCAGTGGTGTAGGGGACGTAAAAAGTTACGGAATGGCACATCAAACCTTGGGCA  
CCAAATTAACAGCACTTGTAGTAGATGACAATAAAATCAACCGAAAGATTCATCAAAGCT  
GTTGGAGAGTGTTGGAATGAAAATCAAGGAGTGAAAATGGCCAAGAAGCAGTGGACA  
TTCATTGCCATGGACAAAGATTTGACCTGATTCTCATGGACATGGATATGCCCATCATGAA  
TGGCATTGAGGCAACAAAGGAATTCGCTCAATGGGCATTGGTAGCATGATTGTTGGTGT  
ATCATCACGCTGTACGGAAGCAGAAATACGAAAATTTATGGAAGCGGGACTGAATGACTA  
CCATGAGAAACCCTTGAACAATTCTAAGCTTAGTTCACTTCTTGATAAGATCAACCCAGT  
TTTACTCGTAATTAGTGGAATTTCAACCGGTAATGTATGAAAAGCAAAGAAGAAAAAA  
ACTTAACCTTACCCGTTCTTGTTCCAAATTCATGGCTAGTTTTCTCTCTTTTTTTCTTT  
TTCTTTTGGTGAATCTGTAGTTCTTTTTTTACTATGGTGAAGTCTGTGACTACGTACGTGACT  
ATCAATGTTACACAAAATAAAGAAAAA

>GmRR35 (Glyma19g35470.1)

ATGACAATATACTCAACCGAAAGATTCATCAAGCTGTTGGAGAGTGGTGGCGTGAAAAATC  
AAGGAGTGGAAAATGGCCAAGAAGCAGTGGACATTCATTGCCATGGGCAAATATTTGACC  
TGATTCTCATGGACATGGATATGCCATCATGAATGGCATTGAGGCAACAAAGGAATTC  
GCTCAATGGGCATTGGTAGCATGATTGTCGGTGTGTCATCACGCTGTACGGAAGCAGAAA

TACGAAAATTTATGGAAGCGGGGCTGAATGACTACCATGAGAAACCCTTGAACAATGCTA  
AGCTTAGTTCAATTCTTGATAAGATCAACCCTAGTTTTACTCGTAATTAG

>GmRR36 (Glyma19g35480.1)

ATGGAACCTCGTCAGTTAACAGCACTTATTGTTGAGGATGACATGGTGATTCCAATGGTTC  
ATCAAAGATTCTGAACAGTGTGGATTGAAAATTC AAGTCGCGGAAAACGGAAAAGAAG  
CTATAGAAATTCATGGCTCCGGACAAAGTTTTGACCTAATTCTCATGGATAGGGATATGCC  
CGTGATGAATGGCATTGAGGCCACAAAGACACTTCGATCAATGGGGATTAATAGCATGAT  
TACTGGTGTATCAACACGCTCAGTGGCAGCGCATATACGAGAATTTATGGAAGCAGGACT  
AGATGACTACGTAGAGAAGCCTTGA

>GmPRR37 (Glyma04g33110.1)

CGTTGTGAGCAGAATTTGATGAGAGTTTTATGAAAGTCTGTAGCGTCGTCGTTTTGATGG  
GAGGGGTAGTTGGTGAGTGAGTGAATGAGTGAGTGAGTTTTCTGGGGGGTTGGGTATGG  
AGTCTGGTGTAGATTAATTTGAACATAGAAAGTGGGAATAATGGGAAGAGTGGTGGTG  
ATGGGTTGTTGATAGGAGTAAGGTGCGGATTTTGTGTGCGATAACGATTCCAAGATTC  
TCAAGAGTTTTACGCTTCTTTGAGATGTTCTTATCAGGTTACCTCGGTAAGTCGGCAA  
GACAGGTAATTGATGCACTGAATGCGGAGGGGCAACATATAGATATCATACTGGCTGAGC  
TTGACCTTCCGATGAAGAAGGGCATGAAGATGTTGAAGTACATAGCACAGGATAAAGAGT  
TTCGCCGAATCCCTGTTATAATGATGTCCGCACAAGATGAGGTATCCGTTGTTGTTAAGTG  
CTTGAGACTTGAGCAGCAGACTATCTAGTAAAGCCTTACGCACTAATGAACTATTAAT  
TTGTGGACGCACATGTGGAGACGGAGGCGCATGCTTGGACTTGTAGAGAAGAACATCTTG  
AATTATGATTTTGTCTGGTAGTATCTGACCCGAGTGATGCCAACACAAACAGCACCACCT  
TGTTCTCTGATGACACAGATGACAAGTCCAAGAGAAGCACTAATCCTGAGGTAGGAATAT  
CAGTCCAACAAGAGCAAGAGGTGAATGTTACAATTAATGTCATTGGATTACATGTGGAGTA  
TGAAGAAAAGTGGTGGTATGTCTCCTCCACACTGATCCAAGGGGTTCTACTATTGCAATT  
GCTGCTGCTGTTGAGGAACCTCCAGATGCTCATGCATCAGAATGCGGGCCTGATGTGGAT  
GGAGTTAATGATCACCAACAGCACATTTTTCATCTGGTCCGAAGAAGAGTGAAC TAAGG  
ATAGGGGAGTCATCAGCCTTCTTACGATGTTAAAGCATCAATACTTAAGAGCAACTTGG  
AAGGGGTTGTTAATGTAGACAAAATGGTGCTACACATGTGAGGATGGAAGTTATGCATC  
AAACATGTGCTCAACAAGGGGTGAATGACCTTCAAATACGGGAAAATGGAGAGGCATATG  
AAAGTCAATCGCAAGATGACTTACCCAGCAGCACTAGTATACCTGATTCTTTGTCTATTGA  
GAGGTCTTGTACTCCACCTGCATCAATGGAAGTTTCACAGCAAAAGCACTACAGGGAAGA  
AAATTTACATCAGGGTGTGATGCATCCAAGAAATGGGACTCATTGTTCCGAGCTTGAAGTA  
TCTGGCATGGCTTCCCAACAGGTTTATCCATATTATTTTACGGGGTTGTTAATCATGTTAT  
GATGCCTTCATCAGCACAAATCTCAGCTATGATTTACAGTACAGCCATCTTCCCAAGGT  
GGTCTCATGGAACGGGGATGACATCCTTCCCATATTACCCAATGAGCATATGCTTACAAC  
CTGGTCAGATTCCTAATCCTCATTGATGGAATCATTGGAAGTCAAGTTCATCTGAAGC  
AAAATTAAGTAAAGTTGATAGGAGAGAAGCAGCATTGATGAAGTTCAGACAGAAAAGGAA  
AGAGCGCTGCTTTGATAAGAAAATTAGGTATGTTAACC GGAAACGACTTGC GGAAAGGCG  
GCCTCGTGTGAGGGTCAGTTTGTGAGAAGTTGAAGGGTGTAAATGCGGATCTTAATGAG  
GCAGCCTGCATCGATTGACTATGACGAAGATGACGAAGAGGATGAAGATGACCAGGAG  
CAAGAGATTCTTCTCCCGAGGATGCTTGAGCATGTCAAATTGCTATTTTGACATAAGGATG  
AAGGGCCAACCAATTTATGAGCTAATATTGGCCTGTCAAAGGACTGCTGTAATGGAAG  
TTCTCTACCAAAGCACCAATTTATGAGCTTGTGCTCATGTATTTGGGGTGTGATCCAATA  
TGCGCCCTCATCATTTATGGTTGAAACAAGCTCATTCTGGTCTTTTTTTAATTGCAGTTCATC  
AAATGATCCGTA CTACTGAGCTATTGCGTAGGGTATTTACCTTCTGGTGGTTATGTCCTATG  
CAGTTGAAAGTATCACCCCTGCGTTTTATTGAACAGTTACAAGCAGGTTGTTCTTGCTTATT  
TTATGGAGAAATGTTAAGACATCTTTAAAAAATTGACCTGAGAAATGAGTTATTTGACTATT  
TATCTAAAGTTTTACTTTC

>GmPRR38 (Glyma05g00880.1)

AAGAGTGGCGATGGATTCATTGACAGAAGCAAAGTGAGGATTTTGTGTGTGATAACGATT  
CCAAGAGTTCTGAAGAGGTTTTGCTCTTCTTTTGGGATGCTCTTACCAGGTTACTTCAGTA  
AGGTCAGCTAGGCAAGTAATTGATGCACTGAATGCGGAGGGGCAATATATAGATATCATA  
CTAGCTGAAGTTGACCTTCCAATAAAGAAAGGCATGAAGTTGTTGAAGTACATAGCAAGG  
GATAAAGAATTGTGTGCAATCCCTGTTATAATGATGTCTGCACAAGATGAGGTTTCCATTG  
TTGTAAGTGCTT GAGGCTTGGAGCAGCAGATTACCTAGTAAAGCCTTACGCACAAATGA  
ACTACTAAATTTGTGGACACACATGTGGAGAAGGAGGCGCATGCTTGGACTTGTAGAGAA

CAACATCTTGACTTATGACTTTGATCTGGTAGCATCAGATCCAAGTGATGCCAATACAAAC  
AGTACCACCTTGTTCTCTGATGACACAGATGACAAGTCCAAAAGAAGCACTAATCCAGAG  
ACAGGAGTATCAATCCAACAGGAACAAGAGGCTAGTATTGCCACCATTGCTGCTGTGGTG  
GTGGAGCTTCCAATGCTCTTCTATCAGAATATCAGCCTGATGTGCCTGGAATAAGTGATC  
GTCGAACAGTTGCAGCTACTCCAAGGCAGCATCCATCAAGCAGCAGAATAATGATGGAC  
ATTTTTTATCTGGTCCAAGAAGAGTGAAGTGAAGATTGGAGAGTCATCAGCCTTTTTTAC  
CTATGTCAAAGCAACAACACTTAAGAGAAACGTTGAAGAGAGTGCTCATGTTGACAATACT  
ACTACTACAGAAGTCAGGGTGAAGATATGAATCAAGCATGACTGAACAGGGGGGTAAT  
GACCTTAAACACATGAAAATGAAGAAATGTTTAAAACCATTCAAGATGACTTACCCA  
GCAGCAATAGTATCCCCGATTCTTTCTCTATTGAGAGATCTTGTACTCCACCTGCATCGAC  
GGAAGGAGTGGTGCATCCAAGAAATGGTAGTCATGGTTCTGGGCCTGCTCAACATGCTTA  
TCCATATTATATTTCCAGGAGTTGTTAATCACGTTATGATGCCATCATCAGCACAACCTTCATG  
CTGGTCTTCCATGATTGCACAGTACAATCATCTTCCCAATGTCCTCCTCATGCAAATGG  
GATGACATCCTTCCCATATTATCCGATGAGCATTGCTTACAACCTGGTCAGATTTCTACTA  
ATTCTGGCCATCATTAGGAAGTTCAAGTTCATGTGAAGTAAAAATAAGTAAAGTTGATAG  
GAGAGAAGCAGCATTGGTGAAGTTTAGACAGAAAAGGAAAGAGCGCTGCTTTGATAAGAA  
AATTAGGTATGTCAACAGAAAACGGCTCGCAGAAAAGGCGGCCTCGTGTGAGGGGACAGT  
TTGTCAGAAAAGTTGAATGGTATTAATGTGGATCTTAATGGGCAACCTGCTTCCACTGATTAT  
GATGAAGATGATGAAGAAGAGGAAGACAATCATGGAGCAAGAGATTCTCTCCTGAGGAT  
GCTTGAGAATCTTAAATTGTTCTTTGACCAAAGGGTGAATGGCCAATGAATTCCTTCTG  
CACTAAAACGTGCTGTTGAGGACTTGACACTGTTCTGGTTTTGATGGAAAATTCATGCG  
ACAGCATTAAATCGATGAGCACGTGCTGTCTGTCCGGGATGCTGATCCAAGTCCCCTGGGT  
ACCCTCCTCATCAGTTGGAGTTCAAACAACCTCTTGCTGGGTATCACTTTCCAAAAGAAT  
GATCCGTCACTCTTCCAGAAGGTATACCTCCTCAGGTCATGTCCAACACGGTTGAAAGTA  
TGGCAGTTTTGTTAATTGTAACCTATTGAACCTATTATGAGATTTACTGTCAAACAATTTTA  
CAACCTGCTCAAGCATATCCTGATATCTCTCTTATAATTTTACTCTGTACCAAGTGTGTG  
TTATTAACCTAATTTAGAGTGGTCAAACCCAAGGTTGAAAGTAGCTGGGTGATTATTTCTG  
ATATTGGTTAGTTGTAGTCATTAATATAGGTTGAGCTATTTACCAACTGTTGAGTGGAATG  
ATCAACCGAAACCTCTGGACAATGTTACTATTAAGATTTTTCACTACAAAGAGGCCATTT  
ATAGCAATTGAAA

>GmPRR39 (Glyma06g14150.1)

ATGTGGGCCACCTCTTCCAAGTGTCTAGATATTTTCCCAAACCAGGATATTTTCGGCAGCC  
GTTGGATCCGAGGTCGTTAACGCTCGTGTCTCATCCACGCCGTTTCGATCCTCCCCTGT  
TAACTTAACGGTAGTGGTTTTGGTTTGGTTCCCCAGCAGATTCTGAATTCTGATGCTATAG  
TACCATTCCATGCCAGAGGTGGTGTATGATGGTGGAAAGTGGGAGCAAGGGTGGTGTGCTC  
ATTTGAAGGGCTTTATGAGGTGGGAGAAGTTCTTGCCCAAGATGATTTTGAGGGTGTATT  
GGTTGAAGCAGATGATTCCACCAGACAGATTATTGCCCGCTTCTCAGAAAATGCAGCTA  
CAAAGTGGCTGCTGTTCTGATGGCTGAAGGCGTGGGAATTACTGAAGGGAAGACCACA  
CAATGTTGATCTAATTTGACAGAAAGTGGATTGCCATCCGATCTGGCTATGCACCTTCA  
CATTAAATTGAGACAGATTTGCAAAAACCTCCTGTTATAATGATGTCTTCCCAAGTA  
TTCAATTAGCACAGTATACAAATGCATGTTGAGAGGTGCTGCTGATTATCTTGTTAAGCCC  
ATTGAAAAAATGAATTGAGGAACCTTGTGGCAACATGTTTGGAGAAGACAATCAGTAGGA  
CTTCTATTCATTCATTTTTCATCAACCACAGGCATTAATGGTCCCCAAGATGAGAGTGTTC  
ACAACAGAAGGTTGAAGCCACTGCAGAAAATAATGCTGCTAGTAATCGTTCAAGTGGTGA  
TGCTGCTTGCATTCAGAGAAAATATGGAATTAATTGAGAAAGGAAGTATGCACAGAGCTCT  
TGTACGAAGCCTGACTGTGAAGCTGAGAGTGGCCCTGTCGATAACATCGATAACATCCAG  
GAATTTTCTCCGCTGAAATGTGGGGAAGCGTATCCAAGATTAATGTGAGCATCTGCAAAA  
ATGGTGAGGCAAGCACAACCTGATGCTGATCCAGAGCATTGTTGGGAATGGCATCAGTGGTG  
AGGCTCATGACAATCACTATGTTCAAATGAACTCTTCCAAGGAAGCCATTGACTTCATTGG  
AGCATTTCACTCATCCAATCTGCACCCTGAAAAATTCCACAGTTAATTGCACGGGCAAG  
TTTGACCTTTCTCCTCAATTGGATCTTTCTCTGAGAAGATCTCGTCCCAGCAGCTTTGAGAA  
TGAACCTACTGAAGAAAGGCACACCCTGATGCATTCTAATGCTTCAGCTTTCAAGCGGTAT  
ACTAACAGGCAATTGCAAATCTCGACGCTGCAGTGTTAATTAACCTTCTCTGATCAACAAA  
GACAACAGATAGCAAATTGTGAAAAAACATCTCACGCATCGCTACTGGCTGCAACTCAG  
ATAGTTCAACACCTAGTATGCAAAGATGTATCGTGTCTCCAACCTACAGTCCAATCAAAGA  
ACCTGAACTTGCAACCTCACACTCCAGCCAGGGCATTCTCTCCAATTCCTGTAAAGGGT

GTAAGGTTCAATGATCTATGCACAACCTATGGTTCTGTATTTCTTCAGTGTTTCGTGCCCA  
GTCAGGTTACCAGCAATGCCAAGTCCAAATTCAGTTATGCTCCTTGAACCAAATTTCAA  
GTCAATGCATTTTATCAGTCAAATATGAAAGAGAGTAGTTCAGAGCAGCTTTATGAACCTG  
GTGGTCCAAATGGAAACACCACCCAAAACACATTGTGTACACACAGGAGCACAAATCAG  
AAAATGCAGAAGATCAAGGACATATCTCTCCTACCACTGATCAAAGTGTTTCAAGTAGTTT  
CTGCAATGGAAATGCAAGCCATCTTAACAGCATTGGTTATGGAAGCAACTGTGGAAGTAG  
CAGCAATGTTGATCAAGTTAACACTGTCTGGGCAGCTTCAGAGGGCAAGCATAAAGACCT  
CACAAGCAATGCAAACCTCTCATCGATCTATCCAAAGAGAAGCAGCTCTAAACAAATTCGG  
CTTAAAAGGAAAAGAGAGATGCTATGAGAAGAAGGTTTCGATATGAGAGCAGAAAGAAAC  
TAGCAGAGCAGCGTCCAGAGTGAAAGGACAATTTGTGCGTCAAGTGCATCCTGATCCTC  
TTGTTGCAGAAAAGATTGCAAAGAATATGATCATTACATATTTCTGACACACTGGAGAG  
GAGAGCATGAATTCCTTAGTATATAGTTGCTTCAAATTTTGTTCCTCCGAATCCTTAAATA  
CCAGAAGCACTTGATCTGTATATGCTTTCTAAAACCGTTTTTCTCATTGCCCCTTCTGTAG  
ATCGTGATATAAATATACCTGATGTATATCATTGTAATTTTACAGTCTTTAGGGATCTTCGT  
G

>GmPRR40 (Glyma19g44970.1)

GTCTAATTGGGTGGATCCCAAGTGGAGTAGGGGAAAATCAAAAACCAATGGCGGAGAATG  
GGACGCGTCAGCAGGGGAAGGACAGGCCACGTTTGGACGGAATGGAATGAGAGTGATGA  
GATCCACATTCACATATATCTGCCATCAGAAGATATTTTGTGGATTTTCGCGGTTTCAGCAG  
CAGCAGCAGCAGCAGATTGTTTGAAGAATGGGTGAAGTGCCGGCTGTGATGCAGGCGACG  
CAGGGGGAACAGAGCAACAATGCCTCCGCTGTTTATTGGGAGCGCTTTCTGCCTCGGATG  
GTGCTTCGGGTCTTGCTTGTGCAAGCTGATGATTCTACTCGACAGATCATTGCTGCACTTCT  
CCGTAATGCGGTTACAAAGTTGTTGCATTTTGTGATGGCTTAAAGGCATGGGAGACATTG  
AAGAACAAAGCATTGACTTAGATCTCATATTAACAGAAGTGGATTTGCCATCAATATCTG  
GATTTTCACTTCTTACTTTAATCATGGAGCATGACATTTGCAAAAACATTCTGTCTATAATG  
ATGCTTCTCATGATTGAGTAAGCATGGTGTAAATGCATGTTAAAAGGTGCAGCTGATT  
TCTTATAAAACCTGTTTCGCAAGAATGAGCTAAGAAACTTGTGGCAGCATGTATGGAGAAG  
GCACGCCATAAGCAGGCCTCCTCAAATTTAACACTGCCGGAGATTGAACTTGGTTTTGCT  
GCAGAAAACCATGCTGCAAGCAATGACTCTAGTGTTCTGTGGCTTCTACACCAAAGAT  
GATGAATGCAGTGAGAAAACAAGTGAGGCTCATAGCACTTGCCCATCGCCATTTTTGGAA  
GCTGAGAGTACCTACATGGAAAATATGCAGGATATATTGCAGCTGAAGAGCTCTTCAAATT  
TGAGCAATATTGACACAGTGAAGCATGAAAACCTTACCAAATGTGAAAGGGAGTCAGATA  
AGCATAATGATGAAGCTGGAGAGAAATCACTGTTTATATTGGAAGATGCAAGGTGCAACA  
AACTTTTAAACCAACAGGTTTAAAGGCTAGGTCAAAGCTATGAGTGCCATGAAACGAGAA  
ATCAAGATGAAGTTCTAAGAATAGAGTTGATAAAATCCAATCCTGAAATTAATACAGATAT  
TCATAGATGCAGTGATGAACTGGTAGATCCTTCTACTGGCGCCATTGACTTGATTGCTACA  
TTCAAGAATCTTCAAAGAGCACTGATGAAAATGTAGTTTCAGTAGTGGTAACACTGCCA  
AGTTTGATTTTGATACACAATTGGAACCTTTCTTAAAGAAGAGATTTTCTGGAAGCTCATGT  
AAAGCTGATTCAAGGAAAGGCAAATATTGAACCATTCAAATGCTTCTGCTTTTCTAGTT  
ATAGTAATAGTAAGTTGTTGCAGCCCCTTTTTCCAACACCATCAACTATCTCTGCTAAATTA  
ACCAATGCCAGTCAGAATTCTCATGAATCCCTTAAATTATCAAAAATACATCTACTTCTCA  
TCAATATAGTGAAAAAAGTCAAATCAGGAGGAGAAAATCATCACTTCAGTCATTGGTCAG  
TCTGGACAAGTTGATCCAAAATTACCAAACAGTCAACTTGGATTGTTTCTGCTACAGGGG  
TTACTTCTGATCACAAGTCTAAAGGAAATGGAAATGTCTTCCCTTCTAAGCTTTATGCAAAA  
TCAGGTGTCCATCCCATATCGACTCCAAAATCAGTGTGCCAGAAAGAGAGTTCTCCATTTT  
CCACAAGCACTTCTCCAGTCCAATCCTCAAAGTCACAACCTCAGAACGTCATCACTGGTT  
GGAAGATGCAACCCATGCTTCTGATCAAATGTAATGATCAAAGCAATTTGGAATGTGAG  
ACACATGACTCTCCTGCTGCTAGTCAGAGTGCTGGTCTAGTTTTTTCCATGACACAGCAA  
ATCATAATAGTAGTGGTGTATACAGAAGTGTGAAATGCTACTTCAGCTAAGGTAGCCAA  
GGAGAGCCATGAAATTTTTATTGATAGTGGTCAACGCAGTTATGATGGATTATAGGGACA  
GATTCTCATCGCACTAGCCAACGAGAAGCAGCTCTAACAAAGTTTTGACTGAAGCGGAAA  
GACAGATGCTATGAGAAAAAGGTGCGATATCAAAGCCGGAAGAGATTGGCAGAGCAGCG  
CCCTCGCGTGAAAGGGCAATTTGTTGCGCAAGTACACGATGATCATCCAGTAGCAGATGT  
GGGTGGTGGTTCTGAAATTGTTTTGTTACCATCATCATTGAATTACAGTCTGACTTCCAAA  
ACTGATTTGCCTCTCTTGACAAGGATTAACCTGTAGGATCTAGTTTGTCTGGTGAAATTATGT  
TTCTTCTAGCATTGTTAGTATTTTCTTCTGGTTTGTATATTGGCTGTCTCTTAGAATGTAG

GATTGTAATTATTTAGTAGGATTGATTTGAAGTTTTGATTTTACCTAGAGTATTTGTTTTCTT  
GATTGAATACTAATATAGGGCTATCGTTGTATAGGCAGTATGCGTCTGTCTTGAAAGATTC  
AAATACCTTTTATATATATATATATATCTCGGCAAGCATCTCTGGTTTGAATCAAACGA  
TCTTTCTTTAATCTTTACATTGATCATTGAGTATCCTTTTTGTTGCACTATCAAGCTAATGTA  
GTTAACATGGGTACATTGATAATTTGTTTTGAGATTCGCTGTAGTCACTACATAAGACTCCT  
GGAACATTGCACGTTGGAECTATTGGCCTCTGAGGTTCCCTTATGATTTGTAAAAGTACTT  
GTATTATGCGGTTACGCGGTCATGGTCCCCCGACCGTTCATGTACTTCACTTTTCTTTT  
CCTAATTCCTCTCTCTTTTCGCGTATCATTAGTTCATCTGAAATGATCGCCAAGCGTGTTAA  
CTGAACGCAGAGTGTGGTTTACTCTAGAAAGCATTTTCGTGGCTTGTGGAACTTGGAGA  
ACACTTGGCTCCGGTTGCAAATACACCCATATGAAAACAGGGCAGAGGTTATCCCCGAA  
AGCATAACTAGTGTGAACATGTGTGATGTGTGTAATTGTATGTGACGTGTGCATACCAGT  
TGTAGGACACACAGCATGATGAGTTTGCTGTAGGATCTGACGAGGCATGGTCCAAACATT  
TGTATAATTGAAGTGAAAACACATCATCTCTTTTCATTCCATGCATAAACTGTTCATTTTT  
T

>GmPRR41 (Glyma13g19870.1)

GAAATGTAATGGAGTTGCTGAAGAAGTTAAGATTGGAAAGGGGGGATTGTGGAGTCCTC  
CTCTGTCCAGCAGCATATACCACAGCCTCAAGGGGCAATAATTTGTTGGGAGAGGTTTTG  
CATATTAGATCCCTTAAGGTCTTGCTTGTGGAGTATGATGACTCTACCCGTCATGTTGTCAC  
TGCCTGCTTCGCAATTGTAGTTATGAAGTTATTGACGCAGCAAATGGATTGCAAGCTTGG  
AAGATATTGGAGGATTTAACCAATCATATTGATCTCATTTTAACTGAGGTGGCAATGCCTG  
GCTTATCAGGCATTGGTCTACTATACAAGATTATGGGCCACAAAACCCGGAAAAATATTCC  
AGTAGTTATGATGTCATCTCATGATTCTATGGGTTTGTCTTTAAGTGTGTTGCAAAGGGTG  
CTGTTGACTTTCTAGTTAAACCCATACGGAAGAATGAGCTTAAAAACCTGTGGCAGCATGT  
TTGGAGAAGATGTCACAGTTCTAGTGGGAGTGGCAGTGAAAGTGGCACACAAACCCAGAA  
GTCTGTAAAATCAAAGAGTCTTGAGAAGTTTGATAATAATTCTGGAAGCAATGGCGAAGAT  
GATAATGGAAGTATAGGACTGAATAATGGGGATGGAAGTGACAATGGTAGTGGCACTCAG  
AGCTCATGGACCAACATGCTGTAGAAGTTGATAGTCCTAAACCAGTTTCCCCTGGGATA  
AAATAGCTGAGTGCCCTGACAGTACCTGTGCTCAAGTTGTTCACTCCAATGCTGAAATTGG  
TGAGAACAAGGTGGTTCTCTAGCTGCGAAGGAGTGCCAGAACAGAAGGAACAACCTTGG  
TTCTAAACATAGCAATGCACCTGATGTCGGCCCTCTAAATTTAATGATCAAATTAATAGA  
GGACAACCTGGATCTTAATTGTGAAAATCAATCTAGCAAGCTAAGCACTTCTGATTCTCAGA  
TGCATAGTGGAGGATTTGAAGCCCTGTATAAAAAACCCAAGTCCTCAGATATTGAAAATAA  
AGACACTAATAATGATGAAGAATTGCCATCTCTTGAGCTCAGTTTAAAGAGGCTTAGAGGA  
GTTGAAGATGCTGGTATTGCAATTCAGGATGACAGGAATGTTTTAAGACGTTCTGATCAGT  
CTGCTTTCTCAAGGTACAATGCAGCCTTAAACCCTAAGAAATCTCCCCTGGATGTGTTGG  
AAGCAATTCTCCTCATAATAATAGCTTAGAAGTTACAAAGAAAGATTTCATCTCACGATATTC  
AATCTCATTCTAGCGGCAATCCTCCTAACCAAACTCAAATGGTGCTAGCAATAACATTGA  
TATGGGTTCCACTACTAATAATGCTTACGCTAAATCTGCAGTTATAAGTGAGCCAGCAGTA  
GCATCGACAACCAAAATATACGACGGCAACAAATGCTGGCACCACTAACTAGACAGACAT  
AAAGATTCTGCACTCCAGACTTCCATCTCCATTGTGAAAACCATAACTGTATTGCTGACA  
ACATGAAGCACAGCTGCCACCTGATCATGATGCTGAATCTATAAAGAAAATGGCCACTG  
CTGCTCCACATTTTGAAGGTAATGTTGGAAACCACAGTATCAATAGAAGTGCCTCAGGCAG  
CAACAATGGAAGCAATGGACAAAATGGGAGCAGCACGGCGGTTAATGCTGGAGGGACAA  
ACATGAAAAGCAACAATGGACTCACTGGGAATAGTGGCAGTGGTGTGCTAGCGGAAGT  
GTAAGTGCCAACAGAGTAGATCAAACAAGACTTCTCAAAGGGAAGCGGCCTTAACTAAA  
TTTCGCCAAAAGAGAAAAGAGAGAAGGGAGAGGTGCTTTTCAAAAAGGTTTTTAAAGAA  
AAGCAAATCCATGGGGCCTTTTTAACATTTGTAGTCTTCTTCATGGAACAAGTAGCCTAA  
GCTGATGATGTTAGAGGCCTTTTCCAGTTTGAAGCCTTGAAATTTCTTGCGCCTCACTTCT  
CATCTTGATCTTCTTGACCCACTCCAAGTGTTCGATATCAGAGCAGAAAGAGATTAGCTG  
AACACGACCTCGATTTTCGTGGACAATTTGTTGACAGTCCTCTAACGAAAATGCAAGTGA  
GGCAACAACAGATAGCTGATTCAGAGCATTGCCACAATGGCATAATGATGGGGATATGC  
GAGAAAAGGTGCGAGGAGTCTGCATGTAGAATTTGGGAATTGTTCTGTGTGTTTGTGTTAAA  
AAGGTATAATGACTCTGGTTATTCCAATGTTTCATTTGAAACCTGAATCAATTTATGTTG  
GAGAGATTGTTATATGCTGATTGATGCTCGGATAACTTATAGCGACTCAATAATTTCAATTA  
CTTGTCGATCTTGTGCTTGAAGAATCAAATGTGTTAGTTC

>GmPRR42 (Glyma12g07860.1)

GATGACACAAGATTTAATAAGGTGGTTGAAGATGGAAACAATGGATTGAGGGGTCTGATT  
CAAATCCATGGGAGCTTGCAGATTTACAACAACCACCTCAAGAGCCAGCCGTATGCTGG  
GAGAGATTTCTCCATTAAGATCGATAAAAAGTTTTGCTGGTGGAAAGATGATGATTGCACAC  
GCCATGTTGTGCGTGCTCTGTTACAGAATTGTAGTTACAAAGTCACTGCCGTTTCCAATGG  
CCTTCAAGCGTGGAAAGTCCTGGAAGATCCAGAAAATGGCATTGATCTTGTCTAACAGA  
GGTAGCTATGCCTATTTTGTCTGGAATAGGTCTTTTGTGCAAGATCATGAGCCACAAAAC  
CTGAAGAATATTCCTGTGATTATGATGTCATCTCATGATTCTATGGGTATAGTCTTTAAGTG  
TTTGTCAAAGGTGCAGTTGATTTTTAGTGAAACCTATTCGGAGGAATGAACTTAAAAAC  
CTCTGGCAGCACGTTTGGAGAAGATGCCACAGTTCTAGTGGTAGTGGGAGTGAAAAGTGCG  
ACCCTCACCAGAAAATTTGCAAAGTCAAGAAGTAATGATGCATATGAAAACAATAGTGAC  
AGCAGTGATGAGAATGACTATGGAAGCAGAGGCTTGAGCATTCTGTGATGGAAGTGACAAT  
GGAAGTGGCACTCAGAGTTCATGGACTAAATGTCTAGCTCAAGTTGGCAGTCTCATCCA  
GTTTACCTCATAAACAGTTGGTTGATGCCCTGATAGCACATGTGCCCAAGTGATGCAAA  
CAAAGACTGAAAAAGTTAGTAGTAGATGGTGCATGCGACGGAAAAAGAGTGCCATGAA  
CTTATTGATCTTGATGATGTTGCAAGGGTTAAGGACTTGGCTATGGGAATATCTTTGAAT  
GCAACTAGAGCATCCACTCGAGGAAGTCTAGCAATCCAATTGTGGGTAAAGGGGCAAA  
TAAGATGTCTGATGTAGATGATATGCAGATCATTAAAGAGAAAGAGCAATGTCTGTAAAAA  
GGACAATTGGAATACAATGGTGATAAAACCGGGACACAGGAAAATCAGGCTATGAATGCT  
CAAACCTGGAATGTAGGAAGCTGTTCCCCACTAGACAATAGCTCAGCTGCACCAAATACA  
GAGACAATGCACAACCTTCCATCTCATTCAAATGGCACTCCTTCAAATCAAAAATCTAATG  
GGAGCAACAACATCAATGACAGGGCCTCCACTAATACATATCTTGGCACCAAACCTGATA  
CTTTTGACAAGAAGCCGGAGTCTGGAAGAGGGATTGGCTCGTATAATTCTTGTGAACTCCT  
AACTGAGGCTCTGAACAAGGATTCCAAGTCGAGCACACTTACTATCAGCTTACCATTATA  
ATCACATTGCCATAAAGCTGCACTCACTCCGCAATGTGTATCATCAAATGCATTTGGAG  
GGCCAGCAGAAAGTAATGCTGCAAACCTATGGTGTGGATGGAAATGCAGTGGAGAGTGATC  
ATGGGAGCAATAATGGACAGGATGGAAGCAACAACCTTGACAATCAGAACGATAAATGTGG  
AAAACGGAAATGTGGCTGCTGGGAGCATTGGAATTGGTGGCATTGATAGGAAAAGCATTG  
GGAACGGGACAGATGAAGTACGGCTTGCAATTGAGAGAGGCTGCCTTGACCAAATTCGCC  
TAAAGAGAAAAGAAAGATGCTTTGAGAAGAGGGTTTCGATATCACAGCAGGAAAAAACTAG  
CAGAACAGCGACCACGTATTAAGGGACAATTTGTCAGACGAATAGTGATGGTCTGAAGG  
CAAAGAAGAAAAAGATAAACAAAGTGACAACCTGGTGCCTGGGGACAATTCTATCGACAT  
TCCTCAATAACACCAGCCAAAATGGTGATCATTATTTGACTGATTCCGTTCCATTAAGTCC  
TCTAGCTTCTTGCTATCGGACTAG

>GmPRR43 (Glyma04g40640.1)

ATGGGAGAGGTGGTCATCATGAGTGGAGAGAAGAAGTCAGTTAGAGTGGAGGGGGTGGGA  
GAAGGAAGATAGTGGTGGAAAGTGGGAGCAAGGCTGGTGAATTTAAGGGGTTGATGAGGT  
GGGAGAAGTTCTTGCCCAAGATGGTTTTGAGGGTGCTGTTGGTTGAAGCAGATGATTCCA  
CAAGACAAATTTGCGCGCTTCTCAGAAAATGCAGCTACAAAGTGGTTGCTGTTCTCTGA  
TGGCTTGAAAGGCAATGGGAATTAAGGGAAGACCGCACAAATGTTGATCTAATTCTGAC  
AGAAGTGAATTTGCCATCCATATCTGAGTATGCACTTCTCACATTAATTATGGAGCAGAG  
ATTTGCAAAAACATCCCTGTTATAATGATGTCTTCCAAGATTCAATTAGCACAGTATACAA  
ATGCATGTTGAGAGGTGCTGCTGATTATCTTGTTAAGCCTATTAGAAAAAATGAACTGAGG  
AACTTGTGGCAACATGTTTGGAGAAGACAATCATCAACCACTGGTATTAATGGCCTCCAAG  
ATGAGAGTGTTCACAACAGAAGGTTGAAGCCACTGCAGAAAATAATGCTGCTAGTAATC  
GTTCAAGTGGTGTGCTGCTTGCATTGAGAGAAATATAGAACTAATTGAGAAGGGAAGTG  
ATGCACAGAGCTCTGTACCAAGCCTGACTGTGAAGCTGAGAGTGACCCTGTGCGTAACA  
TGCAGGAATTTCTGCTGAAATGTGGGGAAGCATATCCAAGTGGAAACAGAGACACAAC  
AGGTTGAAACAAGCTTTGCTTAGGCCAGACATTAATGATGCATGACTGTCATGCTGGAG  
GATTAATGTGAGTATCCGCAAAAATGGTGAAGGCAAGCACGACTAATGACAAGGATACTG  
ATACAGAGCATTTGGGAATGCTAGCATCAGTGGTGAAGGCTCATGACAATCCCTATGTTCA  
AATTAACTCTTCCAAGGAAGCTATGGACTTGATTGGAGCATTTCATACTCATCAAACCTGTT  
CCCTGAAAAATTCACAGTTAATTGCACAGGCAACTTTGACCATTCTCCTCAATTGGATCTT  
TCTTTGAGAAGATCTTGTCCCGGAAGCTTTGAGAATAAACTCACTGAAGAAAGGCACACC  
CTGATGCATTCTAATGCTTCAAGCTTTCAAGCGGTATACTACCAGGCAATTGCAAATATCAA  
TGCCTGCAGTGTTAATTAAGTCTCTGATCAACAAAGAGAACAGATAACAAATTTGTGAGAA  
AAACATCTCACACATCGCTACTGGCAGCAACTCAGATAGTTCAACACCTATGCAAAGATGT

ATTGTGTCTCCAACACTACAGTCCAATCAAAGAATCTGAACTTGCAACCTCACACCCCCCGC  
AAGGACATTCTCTCCCAATTCCAGTAAAGGGTGTAAAGTTCAATGATCTATGCACAGCCTA  
TGGTTCTGTA CTTCCTTCAGTGTTCATACACAGTCAGGTCCACCAGCAATGCCAAGTCCA  
AATTCAGTTGTGCTCCTTGAACCAAACCTTCAAGTAAATGCATTTTATCAGTCAAATATGAA  
AGAGAGTAGTTCAGAGCAGCTTTATGAATCTCGTGGTCCAAATGGAAACACCACCCAAAA  
CCACATTGTGTACACACAGGAGCACAATCAGAACATGCAGAAGATCGAGGACATATCTC  
TCTACAACCTGATCAAAGTGTGTCAAGTAGTTTCTGCAATGGAATGCAAGCCATCTAAC  
AGCATTGGTTATGGAAGCAACTGTGGAAGTAGCAGCAATGTTGATCAAGTTAACACTGTTT  
GGGACAGCTTCAGAGGGAAAGCATGAAGACCTCACAAATAATGCAAACCTCTCATCGATCTA  
TCCAAAGAGAAGCAGCTCTAAACAAATTTGCTTGAAGAAAGAGAGATGCTATGAGA  
AGAAGGTTGATACGAGAGCAGAAAAAACTAGCAGAGCAGCGTCCAGAGTTAAAGGA  
CAATTTGTTGTCAGTGCATCCTGATCCTCTTGTTCAGAAAAAGATGGCAAAGAATATG  
ATCATTAGATTCTGACTACTGGAGAGGAGAGCATGAATTCCTTAGAGTATATAGTTGC  
TTCAAATTTTGTTCCTGAATCCTTAAATACCAGAAGCACTTAATCTGTATATGCTTTCTA  
AAACCGTTTTTCTTATTTGCCCTTACTGTAGATCGTGATATAATATACTGATGTATTATA  
TCATTGTAATTTTACAGTCTTATAGGATCTTCGTGCATCATTATTTATTTATTTATTTA  
TAAGGAGTTGTTTACTTACAACCTTACAAGTTACAAGGACCGACTGATTTATCTTGTAAAGT  
TTTTACAT

>GmPRR44 (Glyma16g02050.1)

GAAGATATTTCTAACTATTTTACGGCTGTGGTTGTGGGCGAAAGCTGCTTGCCAGAACT  
GAGCAAAGAAGCAAGTAAAGGGCGGTTTGGAAATTGTTACTATTATTTTCTCTTACATG  
TGTTGAGGATGATGATGAAGTCAATTTCACTCTGTTTTCTTCTTCTTCTTCTTGTGGC  
CGATTAGGGTTATTATTCTTCTGGCTGTGGAACGAACCATGCTGTTGTTGAGAAATGGAT  
GAGTTGAACTGCGCGATGACGACGACGACGAGGAGAATAGCAATGCGGAGCTGGTTCA  
ATGGGAGAGGTTTCTGCCGCGGATGGTGCTCAGAGTGCTGCTTGTAGAAGCTGATCATT  
CACGCGCAAATCATCGCCGCGCTTCTCGCAAATGCAGTTACACGGTTATTGCAGTTCCG  
GATGGATTAAGGCATGGGAAACATTGAAGAAGAAGGCATCTGAGCTAGATCTCATATTA  
ACAGAAGTGGAGCTACCAGCAATATCTGGATTTGCTCTTCTTCTTAAATCATGGAGCATG  
ACATTTGTAAGCATTCTGTCATAATGATGTCTTCTCATGATTCGGTTAACATGGCGTTG  
AAATGCATGTTAAACGGGGCAGTTGATTTTCTTATAAAACCCATTTCGAAGAATGAGCTTA  
GGAACCTGTGGCAACATGTATGGAGAAGGCACACTATTATCACTCCTACTCAAATACAAC  
ATTTTACCGAAAAAATTTAAACTGCCTCAGAAGACAATTCTGCAAGCAATAAATCTAAT  
GGTTCTGTGGCTTCTCAAAGAAAAACAATGAATGCAGCGAGAGATTAAGTGAGGCTCAA  
AGCACTTGATACACCAATTATGGAAGCTGCGAGTACATACATGGAAAATATGCAGGAT  
GTGTCACAGGATGATACATTGCCAAGTTATGCAAACCTCATGTGCAGAGCACTTGTGCATCC  
CAATTTTGAAGCCGAGAGTACATTTGTGGAATAATGCAGGATGTGCCCCAGCTGGAAA  
GTTCTAAACTGAACAAAATTGATATGGTGGACCATGAAAAGTTTGCCAAATTTGAAAGGAA  
ATCAGCTAAGCATAATGATGAAACAGAGGATAAATCAATTACAATTGTATCAGAGGCTGCA  
AGGTGTGACAAAATTTTGAATTGACAGATTTAATGCTAGAACAAGACTGTGGTGTGCTG  
AACCTGAAACTGAAAACGAGGATGAAATCTTAAATCTGAGTTAGGCAGAGACAATTCTC  
ATGTTTCTATATTGCATGGATGCAATGCTGAGCAGGTGAAACCTTCTAAAGGAGCTATTGA  
CTTGATTGCCACATTTGAAATCTTCAAAGCACCTAATGAAAACCTGTAGTCTCAATGGT  
GGTAATACAACCAAGTTTGTGTTGTAACGCAATTGGAACCTTCTTAAAGAGTGATTTT  
CTGGCAGCTCAGGTAACAAGCAAGTGAATCAACTGAGGAATCTCAAAGATTGAACCATT  
CAAATACTTCTGCCTTTTCTTGGTACAGTAATAGTAAATTGTTGCAGCCTCTTTTTTACCAC  
CATCGATTACATCTCCTAAAGTAAACTGGCTCAATTGGGATTCTCATGAATGCCTTAAATTA  
TCTGGAAATTGTGAGTATGACGACTCAAATCAGAACCTGGAGAATATGATCAGTACAGTCA  
TTGGTCAGTATGGACTCTTACCTGTTTTCAGGAGTTATCTCCAAGCTTAAAGTCTGAGGGACA  
TGGTCATGTTTTACTTCTGTTTTCTATGCACAATCTGGCATTACCCCATGTTGAGTCCAA  
AACCAGTCTGCCAGAATGAGAGTTCTCCCTTCCACAAGTACCTCCTCCAGTCCAATCC  
TGAAAGTCACTGCTCAGATCAACCTCATGACTGTTCCAATGATGCTACTTGTCTTGATCAA  
AATGTAAGGATAATACTGATTCAGATCACGCAAGGCATGAGTCTCCTGCTGCTGATCAGA  
GTGCTGGTAATAATTTATGCCATGATGCTGCAATCATGTTAATAGTAGTGCATATGGAAG  
CATGGACAGTGGAAATGATGGACATGCTACTTACGCTATAGTATCCAAGAACACCTCAGA  
TGGTTTTCAGTGATAGTGGTTGTCATAATTATGATGGATTTAGAGTGACAGATTCTCATCGCT  
CCAGTCAAAGAGAAGCAGCACTAGTGAAGTTTCGACTGAAGCGGAAAGAGAGATGCTTC

GAGAAAAAGGTTTCGATATCAAAGCCGGAAAAGACTGGCAGAGCAGCGGCCTCGGGTGAA  
GGGGCAGTTTGTACGACAACATAATCATCCATTCGCTGAGGCTGGTGGTGATTCATGAAC  
ATTGTTCTCTTTAGGTTTCCTGTAGTATTAATTACAGTTGACTGTAACACCGATTGTGTCA  
ACAAGGATTAGCTGTAGGGTGGTATCTGTGTGTTGTTGGAATCTGTTTATCCATTAGGCAA  
AAGAAGAGTAGGCCAGTAGGGAGATAGCTAAAGGGTAGTGCTAACATTCTTAGGTGTTT  
TCTTCTGGGTTTACATTTGGACTGCCACTTACAACCTTTAGAATTGTAATTATTTAGTGGGATT  
GGTTTGGGTTTTGCCTGTGTATATGTTTTCTTGGTTGAATACTAATATGGGTCTGTAATTACA  
TAGGTTTTAGGTTTCAGTCTGTAATATGGGTCTGTAATTACATGGGTTTTGCAACTGATTGA  
TCTTTCTTTCGATTTCGGCATTAAAGCATTGTTTTAAACTCACCCC

>GmPRR45 (Glyma07g05530.1)

AGTGAGGAGATTTTGGTGGGAAGATATTTTCGACGATTTTCGCGGTTGTGGGCGAAAGCT  
GGCTGCCAGCGATAGTGAATCAGAATCGTAAGCTCGACAAAGAAGCAAGCAAGGTTATTA  
TTCTTTGTGGTTGCGGAACGAAGCATGCTGTTGCTGTTTCGAGAATGGATGAGTTGAACGGC  
GCCATGACGACGGAGAATAGCAATGCGGAGGTGGTTCGATGGGAGAGGTTTCTGCCGCG  
GATGGTGTCTCAGAGTGCTGCTTGTAGAAGCTGATCATTCCACGCGCCAAATCATCGCCG  
GCTTCTTCGCAAATGCAGTTACACAGTTATTGCGGTTCCGATGATTAAAGGCATGGGAA  
ACGTTGAAGAAGAAGGCACCTGAGCTAGATCTCATATTAACAGAAGTGGAGCTACCAGCA  
ATATCTGGATTTGCACTTCTTCTTGTATCATGGAGCATGACATTTGTA AAAACATTCCAGT  
CATAATGATGTCTTCTCATGATTCGGTTAGCATGGCATTGAAATGCATGTTAAAGGGGCA  
GTTGATTTTCTTATAAAACCCATTCGGAAGAATGAGCTTAGGAACCTTGTTGGCAACATGTAT  
GGAGAAGGCACGCTATTAGCACTCCTACTCAAATAACAACCTTTTACCAGAAAAACTTAA  
AACTGCCTCAGAAGACAATTCTGCAAGCAATAAATCTAGTGGTTCTGTGGCTTCTCAAAG  
AAAAACAACGAATGCAGCGAGAGATTAAGTGAGGCTCAAAGCACTTGTACATCACCAATT  
TTCGAAGCTGAGAGTACATACGTGGAATAATGCAGGATGTGCCCCAGTATGTACATTGC  
CAAGTTATGCAAACCTTGTGCAGAGCACTTGTACATCCCCTATTTTTGAAGCCAAGAGTA  
CATATGTGAAAATATGCAGGATGTGCCCCGCTGAAAAGTTCTAAACTGAACAAAATTG  
ATATGGTGAAGCATGAAAAGTTTGCCTAATTTGAAAGGGAATCAGCTGAGCATAATGATG  
AAACAGAAGATAAATCAGTTACAATTGTATCAGATGCTGCAAGGTGCGACAAAACCTTCTGA  
ATTAACAGAGTTAAGGCCAGAACAAGACTGTGGTGTGCTGAACCTGAAACTGAAAACGA  
GGATGAAATCTTAAAATCTGAGTTAGACGGAGACAATTCTCATGTTAGTATGATGCAAGGA  
TGCAGTGCTGAGCGGGTGAAACCTTCTAAAGGAGCTATTGACTTGATTGCCACAGTTGGA  
AATCTTCAAAGCACCTTGATGAAAACCTGTAGTCTCAATGGTGGTAATACAACCAAGTTTG  
ATTGTGAAACGCAATTGGAACCTTCTTAAAGAAGTGATTTTCTGGCAGCTCAGGTAATCA  
AGCAAGTGAAGCAACTGAGGAATCTCAAAGATTGAACCATTCAAATACTTCTGCCTTTTCT  
TGGTATAGTAATAGTAAATTGTTGCAGCCTCATTTTTCAACACCATCGATTACATTTCTGA  
AGTAAACAACCTCAGTTGGGATTCTCATGAATCCATAAATTATCTGGAATTACTTCTGGA  
AATTGTCAGTATGGTGGCTCAAATCAGAACCTGGAGAATATGATCGGTACAGTCATTTGTC  
AGTATGGACAAGTTACACCAAATTATCAAACAGTCAATGTGGACTCTTACCTGTTTCTGG  
GGTTATCTCAAACCTTAAAGTCTGAGGGACATGTAATGTTTTCACTTCTTTGTTCTATGCAC  
AATCTGTTATTACCCTATGTGAGTCCAAAACCTGTCTGCCAGAATGAGAGTTCTCCCTT  
TCCACAAGTACCTCCACCCAGTCCATCCTGAAAGCCACAACCTCAGATCAACTACATGAC  
TGCTCCAATGATGCTACTTGTCTTAATCAAATGTAAAGGATAATACTGATTCAGATCACG  
CAAGGCATGATTCTCCTGTTGCTGATCAGAGTGCTGGTAATAGTTTATGCCATGATGCTGC  
AAATCATGTCAATAGTAGTGCATATGGAAGCATGGACAGTGGAATGATGGAATGCTAC  
TTCAGCTATAGTATCCAAGAACGCCCCAGATGGTTTTCAGTGATAGTGGTTGTCATAATTAT  
GATGGATTTAGAGTGACAGATCCTCATCGCTCCAGTCAAAGAGAAGCAGTGCTAGTGAAG  
TTTCGACTGAAGCGGAAAGAGAGATGCTTCGAGAAAAAGGTTTCGATATCAAAGCCGGAAA  
AGACTGGCAGAGCAGCGGCCTCGGGTGAAGGGCAGTTTGTACGTCAACATGATCATCCT  
GTCGCTGAGGCTGGTGGTATTGATGAACTTTGTTCTTTTTAGGTTTCGTGTAGTATTAAT  
TACAGCTGACTGTAACACTGATTGTGTCAACAAGGATTAGCTGTAGGGTGGTGTCTGTGTA  
TGTGTTGTTGGAATCTGTTTATCCATTAGGCAAAGAAGAGTAGGCCAGTAGGGAGATTTA  
TATTTGGACTGCCACTTACAATTTAGGATTGCAATATTTAGTGGGTTTTGTTTTGGATTTA  
CCTGTGTATATGTTTTCTTGGTTGAATACTAATATGGGTCTGTA AAAAATCCCCTCTAGAAC  
CTCTGGTTTTGCAATTGAGTGATCTTCTTTCGATTCCGGC

>GmPRR46 (Glyma05g06070.1)



AAACCTTTCATCCTCTTCATCTCTCTTCTTCCACCCTTCTGTTTTATTAACAATTCAATAAGAG  
GAGAAAGAACACTCAGTTTAATTAGCAATGGAATTGAAGAAGCATTTCCTTTATGCCAAG  
AAGGAATTGGATGCTGATAAGTGGTATCGATTGATCTGTTATTTCTGTGGGAGACTGAGA  
AACGATGCCAAGCCAGCTATGGTTTTCTCTGCCAATGATTTACAAGAATGGAAAGATTTTC  
CCAAAGGGCTCAAGGTTCTTCTCCTTGAGAGAGACAACATTTCTGCTGCCGAGATAAGGG  
CAAAGCTTGAAGCCATGGACTACAATGTTTCTACATTCTGTGAGGAGAATGAAGCCTTGT  
AGCAATCTCAAGTGGACTCGAAAGCTTCCACATTGCCATAGTGGAGGTGAGTTCAAGCAG  
TGGCCAGGGAGGTTTCAAATTTCTTGAGAATGCCAAGGACTTGCCAACCATTATGACTTCA  
ACAATCATTGCTTGAACACCATGATGAAGTGCATAGCGCTTGGTGCAGTTGAGTTCCTCA  
GAAAACCACTATCTGAGGACAAGCTCAGAAATATCTGGCAGCATGTGGTTCACAAGGCAT  
TCAATGCCAGGGCAAGCATCCTGTCTGAATCACTTAAACCTGTCAAAGAATCTGTAGTGT  
CATGTTGCAGCTCCAAACAGACGATGAACAACATGAAACTCCTTCAACCCCACAATTGAG  
ACAAGGGACGAGATTGTTGGATGATGGTATTGCCAAGAGCAGACTAATTGCTCCACAGG  
AAAAGAAAGTGGGGAACATGAAGGAGAATCTAAATCTGTGCGAAACTACATGTGGTAATT  
GAATGCTGAAAGTACTCCTCAACAAGGAAATCTGAAATTACTTTGGTTAAGGAGGAAGTGGATATT  
GAAAGTACTCCTCAACAAGGAAATCTGAAATTACTTTGGTTAAGGAGGAAGTGGATATTG  
TTGATGCTTCCAAGGGTGAGAGTGTGCTTCTCCACATACACAAAAAAGAAAAAGGAAAT  
CAGAAAAAGATAAAAACTGGACACCTGAGCTGCACAAAACGTTTGTGAAGGCAGTGGAG  
CAACTAGGCATTGATCAAGCCATTCTTCTCGAATATTGGAATTAATGAAAGTGGAGGGCT  
TGACAAGGCATAATGTGGCAAGCCATCTCCAGAAGTATAGAATGCATAAGAGACAAATCT  
TGCCCAAGGAAGAACGAAAATGGTTGAATCTAAGAGAAAGGAGCTATTGTGTTAAAAGAC  
CAATTATGGCATTTCCTCCATATCATTCTAATCACACCCTTCTCTGCCTCTGTATATCCTA  
TGTGGGGACAATCTGGCAGTCCAACGGCTGGCATGCAGATTTGGGGCTCTCCAGGTTATC  
CCTTTTGGCATACTACTGCTGAAAATTGGCACTGGAACCATTTCAGGGATGCATGCAGA  
TGCATGGGGCTGTCCAGTGTACCATTACCACCTCCTCAAACCTCCTGGTTTTCCCTACTCTC  
AGATATTTTTCATCAAATCTCAGAATATGCCTTCGTTGCTCAATGCTGATGCAGTGGATCAC  
ACATTTACCATGCCACAAAGTTCCTTCGAGCATTATCCGGCAGAGGAGGTAGTTGACAAG  
GTGGTGAAAGAGGCAATAAGCAAACCATGGCTACCCTTGCCTTGGGTTTGAACCTCCT  
TCCCCAGATAGTGTGGTGGCTGAGCTATCCAGGCAAGGCATTTCCAACATCCCTCCAAG  
GGTTCAAATTCATGCTGACCTGGATGCATGCACCAAAGAGAGTGGTTCTGATGGTGACCA  
ACTACAAAAGGGTTCCACCTGATCAAACACCCTGTTGCAATTATTTTTGTTTTCTTAAGTG  
TATGAGGTTCCAACCTGTAGTTGAGTGGGAATAGGAGTTGTTGGAGTTGGGACCATTTTG  
TTTTGTTATTTGGTCCCACCAAACCAATTTAAGGTCTCCTATGCTGTTGTCAGCTCGTA  
CGTACAATACTCACTTACCATGATGCAACAACCAAAGTATTAGTAGACATTGTTCTATCC  
GAAGCCACATGCCAAAACAAGGCAACAATAATAATGATGAGAAAAGTCAGCTTCTGCT  
TTAATGCAGTGCAGGACACCCGTTAGGCAAATTTGGCCGGTTGAGAATTGGCCACGCATC  
TCTTGATGCTTCTACACAAATTTTTGTGGTTGAAATACTTGCTGATGTGTGCAAACCTTA  
ACGGGGATATGATATTGTTGAAATGTGGAGCTTTTGGGGGCATAAAGTATACCCTTAAC  
AGTATTTTGAAGGGAGAGAAGGGGGTCTCGTTTTGTGTCGTTGAGTGTGGGGTGCCTA  
ATAATGATGAGAGGATAGGATACACTTTGTGAATAAATATGAGTACACTCGACTTTGACG  
GATGCTAACTCTTCTGAATTTGTTAGGATGTTTGTCTCAATTTAGAAT

>GmPRR47 (Glyma17g16360.1)

ATGGTTTTCACTGCCAATGACTTACAAGAATGGAAAGATTTTCCCAAAGGACTCAAGGTT  
TTCTCCACGAGAGAGACAACATTTCTGCTGCAGAGATAAGGGCAAAGCTTGAAGCCATGG  
ACTATAATGTTTCTACATTCTGTGATGAGAATGACGCCTTGTGAGTATCTCAAGTGGACTT  
GAAAGCTTCCACATTGCCATAGTGGAGGTGAGTTCAAGCAGTGCCAGGGAGGTTTCAA  
TTTCTTGAGAATGCCAAGGACTTGCCAACCATTATGACTTCAAACAATCATTGCCTGAACA  
CCATGATGAAGTGCATAGCGCTTGGTGCAGTTGAGTTCCTCAGCAAACCACTCTCTGAGG  
ACAAGCTCAGAAATATCTGGCAACATGTGGTTCACAAGGCATTCAATGCTGGGGCAAACA  
TCCTGTCTGAATCACTTAAACCTGTCAAAGAATCAGTAGCGTCCATGTTGCAGCTCCAAC  
AGACAATGAACAACATGAAAGTAGAGTATCCATTGATATAGAGAAAGTATCCAGCTTTGTT  
GATAATGATCATGAGCTGTCTCCTGGAATGATAAATATCCAGCTCCTTCAACCCCAAT  
TGATGCAAGGGACAAGATTGTTGGACGATGGTATTGCCAAGAGCAGGCTAATTGCTCAA  
CAGAAAAAGAAAGTGGGGAACATGATGGAGAATCTAAATCTGTGCGAAACTACATGTGGTA  
ATTTGAATGCTGAAATTAATCCTCAACAAGGAAATCTGAAATTACTTTGGTTAGGGAGGA  
AGTGGATATAGTTGATGCTTCCATGGGTGAGAGTGTGCTTCTCCACATACACAAAAAGA

AAAGTTCTAAGCAACACTGACAGAAATACAAAAGCTTCAAATAAAGTAGGTGTTTCATAGTG  
ATTCATGTGAGATAAGAGGAAAGCGGAAAAAGATAAAAAGTAGACTGGACACCTGAGCTTC  
ACAAAAAGTTTGTGAAGGCAGTGGAGCAACTAGGCATTGATCAAGCCATTCTTCTCGAAT  
ATTGGAATTAATGAAAGTGGAGAGCTTGACAAGGCATAATGTGGCAAGCCATCTTCAGAA  
GTATAGAATGCATAAGAGGCAAATCTTGCCCAAGGAAGAACAACGAAAATGGTGAATCA  
AAGAGAAAGGAGCTATAGTGTTCAAAGACCAATTATGGCATTTCCTCCATATCATTCTAAT  
CACACCCATCCACTGCCTCCTGTATATCCTATGTGGGGACAATCTGGCGGTCCAATGGCTG  
GCATGCAGATTTGGGGATCTCCTGGTTATCCCTTGTGGCAGCCTACTGCTGAAAATTGGCG  
CTGGAACCAATTTCCAGGGATGCATGCAGATGCATGGGGCTGTCCAGTGTTACCAATACC  
ACCTCAAGCTCCTGGTTTTCTTACTCTCAGAATATGCCTGCATTGCTCAATGCTGATGCAG  
CGGATCACACATTTACCATGCCACAAAGTTCCTTCGAGCATTATCTGGCAGAGGAGGTAGT  
TGACAAGGTTGTTAAAGAGGCAATAAACAAACCATGGCTACCCTTGCCCTTGGGTTTAAA  
CCTCCTTCCACAGAAAGTGTGTTGGCTGAGCTATCAAGGCAAGGCATTTCCAACATCCCTC  
CAAAGGTTCAAATCATGCTGATGACATGGATGATGATGATGGATGCATGCACACAAA  
GAGTGTGTTTTGATGGTGACCAACTACAAAAGGGTCCACCTGATCAAACACACCCTCTT  
GCAATTTATTT

>GmPRR48 (Glyma01g40900.1)

CAGACACCCTTCAACGACCGTAGTTAAACCTCCTAACTCACTTCCCCTTCCCTCACTCTATT  
TGCTTTGTTTGTCTTCAATGGAATAAGAGCAGAAAGAAAAGAACACAACCTTGGGCAGAGT  
AGTTGGTGGGGCATTCTTTTCAGCCAAGGTAATAGCTAGGAAACAATAAAAAAAGG  
CTTGAAAAGAACCCTTTCCGTGTGCATGCTGATTCTACCTTGATTCATGTGTTTCAGTTTT  
GGAGAAAAGGGATCCAGTGTGATCAGCAATATTGATCTGTTACTTAACTAGGGGACCGA  
GTAAGAATGCCAAACCAGCTATGGTTTGCCTGCAATGATTTACAAGAATGGAAGATTT  
CCCAAAGGGACTTAGAGTTCTTCTGCTTGAAGGAGATAGTAGTTCTGCTGCTGAGATAAGA  
GAACAACCTTGAGGCCGTGGACTATAATGTTTCCACTTTCTACGATGAGAATGAAGCCTTGT  
CAGCACTCTCGAGTAGTCTGAAGGCTTCCATGTTGCTATAGTGGAGGTGAGTACAAGCT  
GTAGCCTTGGAGGTTTCAAATTTCTTGAGAATCAAAGGACTTGCCTACCATTATGACTTCA  
AAGGACCAGTGCCTGAACACCATGATGAAGTGCATTGCGCTTGGTGCAGTTGAGTTTCTC  
AGTAAACCACTCTCTGAGGACAAGCTCAAAAATATTTGGCAGCATGTTGTTACAAGGCAT  
TTAATGCTGGGGCAAATGTCCTGTCTGAATCACTAAAACCTGTCAAAGAATCTGTAGAATC  
CATGCTGCAGCTTCAAACAGAAAATGGACAAGATAAAAAGTAGGATTTCAATTGATTTAGAA  
AATTCTGCTGTATGTGATAAATATCCGGCTCCGTCAACCCCTCAATTAAGCAGGGGACAA  
GGTACTGGATGATGGAGATTGCCATGATCAGACTAATTGCTCAACAGAAAAGAAAGTG  
TGGAACATGATGGGAATGTAATCTGTGAAACTTTGTGTGAGAATTTGAATGCTGAAAG  
TTCTCCTCAACCAAGGGAACCTGATAAGACTCTGATTAAGGAGGAAGAGGATTTTGCCAAT  
GGTTCCAGGGGTGAGAGTGTGTTTCACTGAGTCCAAATAATAAAAAGTTTCTCAGCAATG  
CCGATGGTAATACATCTCAAATAGAACGGGCGTACTTAATGATTCATTTATGCTACATAA  
AAAATTTGTGAAGGCTGTGCAACAACCTAGGTATCGATCAAGCCATTCTTCTAGAATATTG  
GAGATAATGAAAGTGAAGGCTTGACAAGGCACAATGTGGCAAGCCATCTTCAGAAATAT  
AGAATACACAAGAGACAAAGTGCACCCAGGGAAGAAGATCGGAAATGGCATAATCAAAG  
GGATGCAATGCAAAGGAACTATTATATGCAAAGACCAATCATGGCATACCCTCCATATCAT  
TCAAATCACACCCTTTCTCCAGCTCCTATATATCCTATGTGGGGACAACCTGGTAGTCAA  
CAGCTGGTGTACAGATTTGGGGCCATCCTGGTTATCACATATGGCATCCTACAGAAAGTTG  
TCACTGGAAGCCTTATCAGGGGGTGCATGTGGATGCTTGGGGATGCCATTGTTGCCAGC  
CCCTCAAGCTCCTGTTTTCTTACAATCAAATATACCTGGATTGCACAATCCTAAAGCAG  
TGGACTATAGATTCGGCATGCCACAAAGTTCCTTTGAGCATCATCCGGCAGAGGAGGTGG  
TAGACAAGGTTGTGAAGGAAGCAATAAGCAAGCCATGGCTACCATTGCCCTTAGGACTCA  
AACCTCCTTCCATGGATAGTGTGTTGGCTGAGCTCTCAAACAAGGCATTTCCGGCATCCC  
TCTTGGCAACAAGCGTTCTTCTACTCCTAAACTCCGCTGACATGTATGACCGACCCACCA  
CTGGGTCCCACAGAGTAGTGGTTTTGATGATGGGGCCAGCCAGTTACATATCAACGCCCT  
GTTGACTCTTGAATTTTGTCTCAAATTTCCCTCCAGGTTGCAACTAGTGGTAGATT  
TGGCTGGAAGTTGGGACATTTACTTTGCCTTGCATCCCCGCTCCACACCAACCACTCA  
AGATGTCTCTCCTAAGCTGCTGAGCAATGATGTTGATATGATATGATATGATATCAGGT  
CAGGTCATACACCACCATGATGCATCAAAATGGGCAATACATTGATCCTATTCCATGGCC  
ACTTGCCAAAACAAAACGCTAAAAATAACATTAATAAAAAAAGGTTAAGCTATGCAGCAGC  
ATTCAGCAGTTTCAATGCAGTGCATGGCATCATTTGTTGAAACTAAGGACTGGCCACGCAT

TTGTTGAAGCTTTATACAAAATATTGTGGCTGAAAGAAAGATAACAATGTGGACTTTTTGAT  
GGTTGTGGTGGTGAGGGGTTTTTGGTTGTAAGTGACCAGCTTCGGGGTCCATGTAAAAATA  
GCATGACAGGGACTGGAGGTGTCTTGGTTCTGTTGGTGTGTTGGGGAGGGGGTCTAGTT  
GAGGTCTAATAATGAAAAAAAGGATAGTTAGGATAGTGTGTAATAAAAAATGAGTCC  
AGGCTTTGGTTTATGCTAACTTGTCTTTTCCCAATTCAATTTGTTCACTCAGCTATTTTAGC  
TTAAGTTCAGCATTGAGAACAACACTTTGTGCATGTTCAAGTTGTTTTTGTCTCACTTTATCTTT  
TTAACGTTTTGAAAATAA

>GmPRR49 (Glyma11g04440.1)

GACAGCTGTTCAAGTAGTCACAGACACCCTTCAACGACCGTAGTTAAACCTCCTAACTCACT  
CTAGTTGCTTTGTTTGTCTTCAATGGAATAAGAACAGCAGAAAGAAAGAACACAACCTTTGG  
CCAGAAGACTTGGTGGGGGCATTTTCTTTTCAGCCAAGAAGGGATTTCGGTGTGATGAGC  
AATATTGATCTGTTGCTGCAGTAGGGGACCGAGTAAGAATGCCAAACCAGCTATGGTTTG  
CACTGCCAATGATTTACAAGGATGGAAGATTTCCCAAAGGGACTTAGAGTTCTTCTGCTT  
GAAGGAGATAGTATTCTGCTGCTGAGATAAGAGAACAACCTTGAGGCCATGGACTATAAG  
GTTTCCACTTTACGACGAGAATGAAGCCTTGTGAGCACTCTCAAGTAGTCTAAAGGCT  
TCCATGTTGCCATAGTGGAGGTGAGTACAAGCTGTAGCCTTGGAGGTTTCAAATTTCTTGA  
GAATGCAAAGGACTTGCCACCATTATGACTTCAAAGGACCAGTGTCTGAACACCATGAT  
GAAGTGCATTGCGCTTGGTGCAGTTGAGTTTCTCAGTAAACCACTCTCTGAGGACAAGCTC  
AAGAATATTTGGCAGCATGTTGTTTCAACAAGGTAGACTGGACACCTGAGCTGCATAAAAAAT  
TTGTAAGGCTGTGCAACAACACTAGGTATTGATCAAGCCATTCTTCTAGAATATTGGAGAT  
AATGAAAGTGAAGGTTTGAACAAGGCACAATGTGGCAAGCCATCTTCAGAAATATAGAAT  
ACACAAGAGACAAAGTGCACCCAGGGAAGAAGATCGGAAATGGCATAATCAAGGGGATG  
CAATGCAAAGGAACTATTATATGCAAAGACCAATCATGGCATAACCCTCCATATCATTACA  
TCACACCCTTTCTCCAGCTCCTATATATCCTATGTGGGGACAACCTGGCAGTCAAACAGCC  
GGTGTACAGATTTGGGGCCATCCTGGTTATCCCATGTGGCATCCTACAGAAAGTTGGCACT  
GGAAGCCTTATCCGGGGGTGCATGTGGATGCTTGGGGATGCCCGTTGGTGCCACCTCCTC  
AAGCTCCTTGTTCCTACAATCAAATACACCTGGATTGCACAATCCTAAAGCAGTTGA  
CTATAGATTGAGCATGCCACGAAGTTCCTTTGAGCATCATCCGGCAGAGGAGGTGGTAGA  
CAAGGTAGTGAAGGAAGCAATGAGCCAGCCATGGCTACCATTGCCCTTAGGACTCAAACC  
TCCTTCCATGGATAGTGTGTTGGCTGAACTCTCAAACAAGGCATACCAGCATCCCTCTT  
GGCAACAAGGGTTCTTCTACTCCTAAACCCCGTCGAGATGTACGACCGACCCCGCCACCG  
GGTCCCACATAGTAGTGGTTTTGATGATGGGGCCAGCCAGTTACATATCAACGCCCTGTTG  
ACTCTTGAATTATTTTGTCTCAAATTTCTTCCCAGGTTGCAACTACAGTGGTAGATTTG  
GCTGGAAGTTGGGACCATTTTACTTTGCCTGGTGGTCCCGCCGCTACACCGACCACTCAT  
GATGTCTCTCCTTAAGCTGTTGAGCGATGATGGTTGATATGATATGATATCATCAGGTCTG  
GTCATACACCACCATGATGCATCACAATGGACAATAATACATTGATCCTATTCCATGGCC  
ACTTGCCAAAACAAAACATTAATAAAAAAAGGTTAAGTTTCAATGCAGTGCATGGCACCATT  
GTTGAAGCTGAGGACTGGCCACGCATTTGTTGTGGCTGAAAAGAAAGATAATAATGGTGG  
TGGGGGTTTTGGGTTGTAAGTGACCAACTTTGGGGTCCACGTAAAAATTGCATGACAGG  
GATTGGATGTCGGTTCTGTTGGTGTGTTGGGTAGGGCCCCCTAGTTGAGGTGTCTAATAA  
TGAAAAAAGGGTAGTTAGGATAATGTTGTGAATAAAAAATGAGTCTGGCTTTGGTGGAT  
GCTAACTTGTCTTTTCCCAATTTAATTTGTTCACTCAGCTAAGTTCACCATTGAGAACAAC  
ACTTAATTTGTGCATTGTTGAGATGTTTCTACTTACCACGCTTTGGGTTTTGTCCCTTTGTTTT  
TCCTCAATTTATTTTGAATAAATTCTAAGCTACGAGGCATAAGCTATGAA

Promoter regions- 500 bp

>Glyma17g33670 | Gm17:37589130-37589629 FORWARD

GTGATTTCTTCCGGGGTCGATGTCACATATATTTTCTTCAACTGTTGTCTTTAAATCATG  
GTTTTGTACATTCCATATTTCAATTCCTTAGCATGACATAATGACATCAAATCAGTGAC  
CATCTTGTTTCGTCTCTTTAACTTTTTCTTATTCTTCTATTCTTGGTCCGTTAAAGTC  
AAGTTCCTGATCTTGGTGGTACTTTACTGTACTACTTTTGTGTTGGTACATTATTTCT  
TTTATTTCAATTCCACCTTTCTTAATAGTAATTTAATTCTATTATTATATATCTGTTCC  
AATTTCTTACAAGAGACTCATCTTGGCCTAACAGATTGCAGCTGGCACTAGTGCTCTGGC  
TTATAGATAAAGCCAATAATTTAAACATTGACCAGTGCTTCTTGTGATGCAAGTGCTAA  
TGGATTGAAGGAAGAGCTAGTTGAAACCCATAAGTTGAATATTGTGGAAAAGAAATTTGG  
ATGCTATCAGTTTTCTTTCA

>Glyma03g37760 | Gm03:44273843-44274342 FORWARD

ATGCACATAGAGCACCACGTGATTTTGAATTCAGAATATGTTCTCTCAATTCCAATCC  
GAAATTGAGCATTCCGGCCGACTGATACACCCTATAAATTCGTCCTCAACCAATTTTGCA  
AAACTTTTGAGTTCAACTCTCAAGATACTAACCTTTCATTCTCTGATATCAAGACCAAG  
GTTATTAATACTACTTGTCTTCTCACGTAGAAGAATTATTAGATGGGTCAGAATTA  
GAATTATGTGGTTTCAGTCTATCTCTATGTGATACATAAATTATTTTATTTAATTTATG  
AAAGAGTTAATAATTTATTACACGAGGATTGATTGAGACTAAATCATTCCAACCATGTAA  
TAAATTTTACATGAGAAATATTACATTTGAGTTTTGTATGTAACTTTTTATTTGTTCTT  
GTTTTGGACTTTGCAGGTGGCTCCGTTATTATTTAAGCATTGAGACGGTTCCTAACTT  
AGCCCAAATTTACATACATAG

>Glyma06g06240 | Gm06:4469142-4469641 FORWARD

GCACATACCTCTCTGGGATTCCTTTTTTTTATTAAGATTGTTCCCTTGTACCTCACATAT  
TTATAAACACATGCTGCCCTCTCCAACCTCCATATGCTAACTGCTTCTCTATATAACAATA  
GAGAGTTTCTTCCAATTCCAAAGTGAATTTCTGTAATTTAAATCAATCTATGCA  
CCACAGTTTTTGGAGAAGTTAGAAGAAAGAATTCTATATAAGTTAAGCATATAATTTGA  
TTTTAACTTACAAGAGAAGCTCAATTCAATTTAGCTTATGAGAGAACTCAATTCATTTT  
ATCTTCTTTTCTTCTGTAATTAAGTGGTTATGAAGAAATTTATTCAACCAGGACTTCAGT  
ATCAAACCTTATGTGAGACAGATCTTCTCCTAACATATTGCAGTGCTTGGGCTTCCATCCG  
AGTGTGCTGTTTGGTGTCTCTTATGATGCAAAGGCCAAAGAGATATTGAACTTGCAATA  
GTAATTTTCTGCTCGGCGAG

>Glyma02g09550 | Gm02:7475050-7475549 REVERSE

TCTAACTGTTTCAATCTTCTTATCTTCACTTTTAGATTTAGCCTTTTGTCTTCTTTTCTTCTTCTT  
CCCCACAGTGGGCAGTTGTGGAAGAAAAAATTGATATTGATGCTTGTATCCTTCAATTT  
ATTCTTTCCCTTGTATACGTTAAATTTATTCACAAGGACTTGTGCTTGTGATAACA  
TTACTAATTAATTTGCACATCTTGAAGTTTACTGAACAAGGGCATATATTTGTTAAAGTC  
CATCTAGCGGACAACCGAAAGTCCATGATGAATGGAAAACACGAGACTTTTCTAAATGGA  
GAATCAGATGAAGTTTCTATATCTGGTGATTATCATTTCAAAACCTTAAGTGGATGT  
GAAGCAGTGATGAACGGAACGAGTTGGGATAATTTAAGCATCTAATAGCTGACAAAGAA  
TATGGCCTTGATTCTTCTAGAGAAACAATGGCTGCTTGTGAATCTTCCGAGCAAGTCACA  
TTGAGGGTATGCGTGGAGGA

>Glyma02g05220 | Gm02:4231677-4232176 REVERSE

TCTTACATGACATAATTTATGAAGTTAATAATAAAAATTCCTTGTATTGATAATACAT  
AAAAAAAATTTAATTTATTATTAGAAATTAATTTCTTGCTTGTCCGTGGGAGGAAACT  
ATGGTGGAAAAATATATTTGAAAAGCTTTTCTCTGCCAGCCACACAATATATTTAAAT  
TTTGTATCTCCTTACAATCTCGCAAACAAGTGTTAAAAGGGTGACATGACTTCCACCTA  
AGTAGAGTCTAGGAAGGGTAGTAGATGTACGCAATCTTAGCCTAGATAGGTTCTGTGATT  
TAATAGGGGAAGTGTTATTATCCAATCAAATTCGTGAAAAGCTATTTCCCTCTCAAGCA  
CACAAACAAGTTTAATTGCTACTTTATATGCTCATGGCTGCTTCAAGTAACACAACAGT  
GAGTTATATGTGACAGAAGACAAGACCAAAGTTCTTCTGAAAGTTCTGTATGGTCTCTC  
CAGGTTCAAGGTAGCCAATA

>Glyma02g47610 | Gm02:51135886-51136385 FORWARD

CTATACTTTCAATTTTATTGCTGCATATTGTGCTCGCTGAGGATAATTCATAATTATTTA  
CTTTTGCTTAGAACTTTAATTAATTTGGCTTCTTCTATGTACTAACTGTTCTTTCTATT  
GGGCGTTATTGTCACTAAACAACAACCTTCTTGTGGATTATATATTTGAGCTGAAGTGA  
AAGATGTAAAATATTGAGAACCAATAGATTGTCTTAAATGAAAGGGTATAAACCATGCTC

TTCTGATGCTTTTTCCGCAAGGTTTCTCTAGGATCACCTTATTTTGTACAAAAGGTTGAT  
TTCTAAAAGTGATGGATACTCTCTTGGCTAGATTTTTGATAGAAAACAGTGATTGTTGCAG  
AGATAAATATGAACAGTAACAAAGTCGTGCTCTTTGCTCCTATGTCTTACTAAGTTTATAA  
TGCAGATTTTATCCAACGTATTGATGAAAGAAGACTTCAAATGCTGCTAGGCAGCGGCA  
TGGTTAGCACTCCACAGTTA

>Glyma14g01040 | Gm14:565485-565984 REVERSE  
TGTGGAAGCTGGGTGAGAAATGTAACATAAATGCATCATCTGGATCTACAGTGTAC  
CATTTTGTATGCACTTGAATGTAATCAAAGATTCCCTTGAATTGCCTATCTGGCATCAT  
AGCATTCTTTTATAGCTTGGCTAGTGTATAATAAATTCTTGTCTTGTGTTAAAGA  
CAGGGCATCACCGATGATAGTCTAGCTTTCAAATCATTCAACCTACAGCCTAATAAAT  
AGTCATATCAAGGAAAAGTAGTGGATTTTGGTTTATTTGCTCCAAATATTGCCTTTCCA  
TGTTACTTGTGAATGTGATTTATACCATAGACTCTGCTTCTAAGCTTGTGCAATAACTAT  
GAAGGCGTGAATCCTTGCATGCTTATTTGAAACAAATACTTCCAATATAAATTAATT  
GCTAATTCATTTTGGCTTTGCAGAACATTGTGCAATCATGGAACTGAGGGTATCTGCA  
TTCGGTATCATGCGAGTTCA

>Glyma08g11060 | Gm08:8075055-8075554 FORWARD  
TTGAGCCATAATTTATAATTTTTAGTAATTTTTTTCATCTCAATCAAGACTTTAACTTAAT  
ATTTTATTTTATTTAAAGAGATTAATTCATTACCCTCGTACCAATGATTGTTATTTT  
ATCTCAATTTTTTATTATTACTTGTGTTCAAATATGCAATATAACTTTATATATA  
TATATATATATATATATATATATATATATATATATATATATATATATATATATA  
TAACAAGCTTGTTAAATATACTATAGTGTTTATTGCTATATTCTTTTGACAAATATTG  
TTTTTTGAGTGGATAGTTTGGAAAGAGATAATGGACTATAATAATGTTGAAAACAATTG  
GCTATGCTACCGTATTATTCTTATCATCTTGCCTTGCCAAATTCTCCTACTACCTGAGCT  
CGATGAACAACAACCTATTGCTTTAAAGTCCTTGCCAGCTTCATTCTCCACGTTCAAGT  
ACCTTCTTTTTTTTTTTTTT

>Glyma06g06180 | Gm06:4436372-4436871 FORWARD  
NNNNNNNNNNNNNNNNNNNNNNNNNNNNNNNNNNNNNNNNNNNNNNNNNNNNNNNNNNNN  
NNNNNNNNNNNNNNNNNNNNNNNNNNNNNNNNNNNNNNNNNNNNNNNNNNNNNNNNNNNN  
NNNNNNNNNNNNNNNNNNNNNNNNNNNNNNNNNNNNNNNNNNNNNNNNNNNNNNNNNNNN  
NNNNNNNNNNNNNNNNNNNNNNNNNNNNNNNNNNNNNNNNNNNNNNNNNNNNNNNNNNNN  
NNNNNNNNNNNNNNNNNNNNNNNNNNNNNNNNNNNNNNNNNNNNNNNNNNNNNNNNNNNN  
NNNNNNNNNNNNNNNNNNNNNNNNNNNNNNNNNNNNNNNNNNNNNNNNNNNNNNNNNNNN  
NNNNNNNNNNNNNNNNNNNNNNNNNNNNNNNNNNNNNNNNNNNNNNNNNNNNNNNNNNNN  
NNNNNNNNNNNNNNNNNNNNNNNNNNNNNNNNNNNNNNNNNNNNNNNNNNNNNNNNNNNN  
NNNNNNNNNNNNNNNNNNNNNNNNNNNNNAGGAAAGTGATGTGTGGTCAAACAAGAGGA  
GTGAGATGATGTTGAGTATGACACTGTC

>Glyma14g12330 | Gm14:11061398-11061897 REVERSE  
ATTC AAGTGTGATTTCTT CAGGGGTTGATATCACATATTTTCTTCAACCGTTGCTCCTCAG  
GTCATGGTTTTGTCAATCCATATTTCAATTCTTTAGCATGACATAATGACATCAAATC  
AATGAAACATTGTGTTTCGTTCTTTTTAACTTTTCTTATTCTTCTATTCTTTGTTGGTTCGGTT  
AAAGTAAAGTCTTCTGATCTTGGTGGTTACTTTCCTACTGTACTACTTTTGGTTTTGTACTT  
CTTTTATTTCAATTCCACTTTTCTTAATGGTAACTTAATTCTATTATTATATATCTGTT  
CCAATTTCTTACAAGAGACTCATCTTGGCCTAACAGATTGCAGCTGGCACTAGTGCTCTG  
GCTTATAGATAAAGACAATAATTTAATACATTGACCAGTGCTTCTTGTGATGCAAGTACT  
ATGGATTGAAGGAAGAGCTAGTTGAAACCACAAGTTGAATATTGTGAAAAGAAATTTGG  
ATGCTATCAGTTTGCCTTCA

>Glyma05g34310 | Gm05:38686919-38687418 FORWARD  
TTGAGACTCATGCTTGTCTCTCAATTATTCTTCTTTTAAATCCTGGGTCTTTTGGTTTGA  
ATTTTTCCATTTCTTTTCTTTTTCTTTTTGGGTGGTGTATTTTTGCAATAGGCTTAG  
CTTCTTTCTTAAATAAGAGATAAAATAAAGAAAAGAATTTGCCAACTGGTCAATCATTC  
ATTGTGCTAGTTTGTCTTTTGGTCTTCTTCTGTAGTTTGAATCGCGCAAACAATGCTG  
CAATGATGCCGTACATGGAGTTTTGTTTCTGTGACCTTTTTCTTCCAACCATCAGAGAAA  
AGTGTCTGTTTTTTGTAGTACTACTTTCAGCTTTAAGCATAGTGAGGTCCTCCTACAT  
AACTCTAACCACAATTACTTTTGGGGCTTCTTTTCCGACTTTTATAGATGATGAATAGG  
GCAGAAAGATAGGGAGGGGCAGAGAGAAATTGTTGGTGTGGGTCCTGGTTTGAAGATGA  
AGAGCCTGAGGCACCACCCC

>Glyma04g06190 | Gm04:4739419-4739918 FORWARD

TTTTATATGAGTTAAGCATATAAGTTGATTTAACTTACGAGATAAACTTAATTTATTGT  
AGCTTATGAGAGAAATTCAATTCATTTAGGATAAATTTGTTAAAGCTTATTTGTTAAAATA  
AATGTTTATTTAATGATATAAGCGCTTAAAAAACAACCTTTCTGTTTTTCAATGTGTT  
TGTCTAAATTGCTTATGCTTAAAAAATAATTTGAGTTATTTAAGAAATAAATCTTCAA  
TCTTCTTTTAAAAAACTCTTCTTTTAAAGTTATTTTTTAAAAGCTTAAGCAAACCTCAC  
TTTATCTTCTATCTTCTGTAAGTGCACATGGAGAAATTTATTCAACCAGCACTTTAGTAC  
CTAECTTATGTGAGACTGATCTTCTCCTAACATATTGCAGTGCTTTGGCTTCCATCCGAA  
TGTGCTGTTTGCAGGCTCTTATGATGCAAAAGGTCATAGTGATATATTAACCTTGGACTA  
GTACTTTCATGCTCCTCGAG

>Glyma09g00490 | Gm09:218947-219446 FORWARD

AAAATGTGGATAATGCACACGCCATCTATCTTGCCTGAAATTTATCTTTCCATTAGAA  
TAATTGGGGCAACATTGATCGAATTTTAGATCGATCACTTGACCGTGCAGGCTTGGATAC  
CATGTTAGGAACCAACTATCCCCAAATGCTTAAAGATGTTAGGTTAAGACATGAATGGTT  
GTTACTACATCTCTAACTTACTGTCTCATTTTGTCTGCCTTTGTTAATTAGGTCAGTTCA  
ACATTATAGTTTATGATTTTATAGTACATAACTATCTTATTTTAACTGATTTTCTCTT  
TTATCTGTGGTTAGAAACACATGCCAGGGGAATTGAATGACAGAATGTTCTGACATTA  
TATTCATTTGATAGCTGTTTTTATTTCGAATATTATTGTTGTTTTCATCTGTTCCATTCCC  
ATCTATCTGATGCTTAACTTTTCCATCTTTTAAATGTAGTTATGTGAAAAGGAAAATCG  
CCTGAGGTGGTTCAAACACT

>Glyma11g08310 | Gm11:5890150-5890649 FORWARD

TTCAATTAATAAATTTAACTTTAAACCACACAAATTAGTCTAACTTATGTCAAAAATTGTTA  
TTGTTATAAATTTTTACTCTTTAGGGGAAGTTTTATAGCTTAGCATTTATCAGTATCAGT  
CTTTTGCTTTTCTTTAGTACAGTATAATATTGGAATGCGATAAAAGATCTTCTCAATGTA  
TGTCTAATATGAATGCATTATAAAGATAAAAGGATGCATTTATTTTTGGTACAGAAAATA  
ATGCATTTTGTAAATAAACAATATGTTATGATATTATTAATAAATCATCAATGTATTGAT  
ACGCACACACTCACTATATATTGAAACTTAAACACACATACAGAGAGGCTTCTCTGTTTG  
ACACACAGGCCAAGCATAAACAAGTTGGAATCTCTCAGATGAGTTGCTTTATAACCTCAT  
ACTCATAGATTCTGCAGTGAGTTATGGCAGAAAACAAAGACGAAATCTATTCTGAATGTT  
CACCAGGCTCAAACCTCTCCA

>Glyma08g05370 | Gm08:3808914-3809413 REVERSE

AATATTGGCTGTTGGGAAGGAGAAGGTGGTTCTTTGGAATTTGAGCTCCTTTTTTTTTT  
TTACATCTTTTGAGACTCATGCTTGTCTCTCAATTATTATTCTTCTTTTAAATTCTGGAT  
CTTTTAGCTTTGAGATTTTTTCTTTTTGCAATAGGCTTAGCTTCTTTCTTTAATAAGAT  
AAAATAAAGAAAAAGAATTTGCCCACTGGTCAATCGTTCATTGTTCTACTAGTTTGGTT  
TTGGTTCTTCTTTCTGAGTTTTGAATCGCGCAAATCAATGCTGCAATGATGCCGTACATG  
GAGTTTTGTTCTGTGACCTTGAGAGAAAAGTGTCTGTGTTTTTGTAGTACTAGTTTCAA  
CTTTAAGCAAATTTGAGGTTCTCCTATAAAAGCAATAACCAGAATTATTTTTATTTTTGG  
GGTTTCTCCGACTTTTATAGATAATGAATGAATCGGACAGAGAGAAAAGAAATTGTTGG  
TGATGGGTCTTGGTTTTGAAG

>Glyma07g27540 | Gm07:30902949-30903448 REVERSE

GAATGGAAAACACGATACTTTTCTAAATGGAGAATCAGATGAAGTTTTCCATATATCTGG  
TGATTATCATTTCAAACCTTAAGTGGATGTGAAGCTGCCGATGAACGGAATAGTTGGGA  
TAATTTAAGCATCTAATCGCTGACGAAGAATATGGCCTTGATTCTTCTAGAGAAACAAT  
GGCTGCTTGTGAATCTTCTGAGCAAGTCACTTGGAGGTGTGCGTGGAGGACTGGAAT  
TGGAATTCCTTTCTCAGCTCAGGATGGGATATTCATGCCATTTGTGCAGGCTGACAGCTC  
AACCTCACGAAATTATGGGGTACTGGTATTGGCTTGGATATCAGTAAATGTCTGGTTGA  
GCTAATGGGTGGTCAAGATAAACTTCATAAGTGCACCCAGGTTGGGAGCACTTTTCTTT  
TACTGCAGTTTGTGAAGCATTTAAGAAAAGTTCAGTTACCAACAAGAAGAAAATTTGGA  
AGATCTGCCTTCAAGTTTTA

>Glyma19g40090 | Gm19:46552180-46552679 REVERSE

CACAATGCCCATGGCCTAGAAAGTTGATTGATCACACAAACACCAAATCAGAATTCAGAA  
TTCAGAATTCAGAACTCGCGTTTTACTAATATTATTCTTTTGAATTTATTTTATACGTA  
CCCAGAAAAGTGAAGCTGAGTAGGCCAGGCCACCGTCCAATGAATTCCTTTCCAG  
CCTCTAAACAGAAAACCTTTTGGCAAATATTACCAAAAATGAGAAAATAAAATAAAAAGGT

GCCAGCCAATCCGAAAATGATGTGGCACGTGTGTAAGCGAAAAGTAAAATGAGAGAAG  
CATGAAAAAAGGGCACGCCCGAGTGGGAGTAGGCGTTTGCCATGCTTGTCCGTGAGGG  
ATGGGCTTAACGTTAATCTCATGTCATGCTTTTTAACCCACTCACACACTCTCTTTCTTC  
TTCATGCCCGCCTCCCTTTCTTCTTCTTTGGTAACATCCTCTTCTATAAACACTCTT  
TATTCTCTATTTACTTCC

>Glyma03g37470 | Gm03:44081715-44082214 REVERSE

ATAATTTGAATATGAAATCAGTGAATAAACACCAATTAATTCTTAATCGAAACATGTGGT  
TTGATAAACAAACAAGGCAATTGGAAATTTGGACCGGATGCACGGGATTTGACACCCATT  
AGGAAAAGTTAACACACATCGATATAGTGGTCCAAATTCAAAGAACTTCACAATGCCAC  
GGCCAAGAAAGTTGAATTACGAACACCAAGCAGAATTAAGGACTTCAAATATATTTTTT  
TGAAAGGGTGAATCGAATCTGAAATTTATTTACACGTAGCCAGAAAAAGTGAAGCTGAG  
TAGGCCCAGGCCACCGTCCAATGAATCCCATTTCTAACATAAAAAACACAGCCACAT  
TAGCTTCTAGGCAAAAATGAGAAAATATAAAATAAAAAAAGGTCCCAGCCAATCCGAAAA  
TGATGTGGCACGTGTGTAATGAGAGAAGCATGGAAAAAAGGGAACGCCCGAGTCAGA  
GTAGGCGTTTGCCATGCTTGT

>Glyma05g28070 | Gm05:33959556-33960055 FORWARD

TATCTATCTATACCTACGTCTTTTACTCTGGGTCTCCCTCCCATGGCAATTTTGT  
AAAGTACTACGGGTATCAAATGCCATTGTGAGCAAAGAAGCTTACGCCTTATTCTTGA  
AATTTTGGTTCCATGCAGGGGCACCTTTGCCAACACAAAAGTACAGCTAAACAAACACAC  
GCACGCACAGAGCTAACGACTTAGCGTGAAGAAGTTGTCTACTGGCATGGACGGATAGG  
GATGTGAACACAAAGCAGACCAAAGTTAAAAAAGGCTGTGATTTCTGCTCAGTGGAACT  
ATGCCTTTTCTCCCTCTATTTTATTATTATTGTTATTACACTTGTGTTCAAATATACAAT  
AATAAATTTATTTTTATAATAAGCTTGTAAATATATAATGTTTATTGCTATATTCTT  
TTGACAAGTATTGTTTTTTGAGTGGATAGTTTGGAAAGAGATAATGGCCTATAATAAT  
TTTGAACACATTTGTGCTGT

>Glyma12g37050 | Gm12:40025318-40025817 REVERSE

TGCATCTTTATGTTTCAGAACTTGTTTTGGAATGAGATTGTCTTCTAGCCTCTATCTTGT  
TCTCCTGTGGTTCTTTTGGAGGAGTTTTCATTTATCATATGGAGAGAGGCTGGAGAGCTG  
GACAGCTTTGCTGAATTTTTAATTTGTTTTGGAGGATATTTATCCTCCCTTGTTCAG  
TTTGTCTTCTCATAAAATATCATTTTCTGTTTTAAGAAGACTTGAACTTTTAATGTA  
GTATAACCAGTAGTACTCTGTCATGAATCAACTATCCTAAAAGCTTATACTATTAAGTGA  
ACTTGAATGGTTTTATATTGCATCTCTGAAAGGCCCTCACACAAGAGCCCTTTGGGATT  
AAAACCTGGATTATGCACAACCTTTCCATCTAGTTTGTGTTTTCGTCTGTTCCATTCCC  
TTCTATCTGATGCTTGACTTTTCCATCTTTGATGTAGTTATGTGAAAAGGAAAAATTG  
CCTGAGGTGGTTCAATCACT

>Glyma01g36950 | Gm01:49347823-49348322 REVERSE

TCATTTCAAATAAATTAATATGAACAAAAATAAAGCAAAAAAACAATATAAACTAGAAG  
CTGAAAACCTGTATCATAAATAAATTTATCTCTTTAGGCGAAGTTTTACTAGCACTTAT  
CAGTACAGTCTTCGCTTTTCTTTAGTACAGTATAAATTTGGAATGCGATAAAAGATGTT  
CTCAATGTATGTCTAATATGAATGCATTATGAATATAAAAGAATGCATTTTTGGGGGTA  
CAGAAAAGAATGCATTTTGTAAATAACAATATGTTATGATATTATAAATAATCATCAA  
TGTATTGATACGCACACACTCACTATATATTGAAAACCTCACACACAGAGAGGCTTCTCT  
GTCTGACACGCAGGCCAAGCCTAACATAAACAAAGTTGGAATCTCTCCGATGTGTTACTT  
TATAAGCTCATAGCTTCTGCAGTGACTTATGGCAGAAAACAAGATGAAATCTATTCTGA  
AAGTTCTGAATGTTACCAG

>Glyma10g29890 | Gm10:38642689-38643188 FORWARD

GAAGTGTGAAGTGAAGGGCTTAGGATCTTGACTTTGAAAAGAAAAATAATACCTTTACC  
CCATATAGGCAAGTACCACCTAGGGTTGAGGGGTGGAATTTAAAATGATAAGCAAGGTT  
TTTAAGAAAATAATGCAAAGCAAGAAGAGATAAAGATGGAGGTAATATCTACTAATCTAC  
TAAGAAAAAAGGAGGCAATAATTACCAAATGAAAAGATGGAACATGAATGGTACGTG  
GCGTGAGTTTTAGATTAGATCTATTGGTCCTATTAGTTTAACTATTAGAGGTAAGGTTG  
GCCAGAAATGATAGGTTGATGGGGAAGCAATGAACAGAAACACAATAAGTGACTGACTTT  
GAAAACCTGTTTTCATATGATTAAGAAATATATGTGTATATATATATATATATATATA  
TATATATATATATATATATATATATATATATATTATAAAACATAAATGATAGTTGT  
CTCAAGTATAAAATAAAAAAC

>Glyma08g21510 | Gm08:16334343-16334842 REVERSE

CAACATGGCCTTAAATACAGTAGACATAGAAACCACAAAATAAGTATAAGAATTTGATAA  
AGTGGGATATTTTTACCTATAATTACAACTTGGTTTCAATAAAGCGCAAGTACGTAAT  
CCATCAATTTCTGTATATCCATCCATGTGAAGTGTGAAGAAAATATGATCTTAGCGGTGA  
GATATAATAACATTCAAATGTGCAAATACCATTCAAGATACTCCCCCCTAATTGCTT  
ATGAAGTGCCCTTTCTTGACACGATTTACTCTCACAAGTGCATGCAAAATGCAACTTT  
CGAATTTGCAACCAGCTAGCCCCACCCCTCAATGATGAAAAAGAAAAGACGAAGCTTTT  
GTCTTGTGCTTCTCACTTCTTAGATCCTAGACACCTGACATCTTTTTTCTCTTGCTATAA  
AACCTTCTCTCCCCACCTTCATATCATGCATTCTCACCCCTTCAATCACCATAAACAA  
CTTTCTCTGCCTAATTCTCT

>Glyma07g03390 | Gm07:2379090-2379589 FORWARD

CAATTTAATATAAAACCATTAATAAATAAAACAATATTTTTGTAGACTCAAATTAATAGG  
GCGTTTGATTGTGTTGAAAGCATACAAGTCTAAGATTAATAAACATTACTATTAAGTAAT  
TTATTTAAGCTATGAGAAAAATATTAATTTATAAGTTTTTTTTGTTTTAAATTTTAAAT  
ATAAGAATATTCAAAGTAGAAGTTTTATTTAATCAATTTGATTATTTTTAATTGAAGCT  
TAGGAGTAAAGATGCAATAATAGGAGGATGAACAAGAATAATTAATGTGGTCTCCAAGG  
CTTTAATAGTGGTACATATACAATATAAGAGGAAGGAAGTGGAACACAAAAGTGAAC  
CTATAACCCACAAGGAAAAGAAGAAACAAAGTTGAAGTGAGAAGAGGGTGCTCCATTTA  
GGGCCACTCTCGAACACTTTGATCATCAATCAATTTAAGTGAATTGGTTGAGTCAGCCA  
AACGGGTCTCCCTTTGTGG

>Glyma07g38310 | Gm07:43090238-43090737 REVERSE

ATGACTAAAGATTAAGCTCGTGTCTTAAAAAACATGAGTTTGAATTCCTATGTCTAAAT  
GAAGACCTTATTAGTTCTTAAAGTATTTTAAAGGTTCTCTGAGTCTTAAAATTTGTCT  
TTGGTGAATTTGAGAAATCTAATTCACCATTTTTTAAACCAAAGAAAATATGATCAAAT  
CAGAACATACAATGACAAATCATGGATAAAAATGATATATAAAGATAAACAGTGGTGGGG  
TCAGTGATTCTGTAAGAAAGCAAAGAATAGATAGGAATAAACTAAGACTCTACGGGGCC  
GGGCAGAAAGAGATAGTAGACGTGCACCAACAGCAACTAGACCTTGGATTTTGCACCTCT  
ATTTCTCATCAATCTCTTTCACGTTCTAACGTGCATTATTTATTTATTTATACCTCCCTT  
TTGATTGAGCAATAGCATTAAAGTATCGTGTAACATAACAAAAAAGTAGTGCTTGTGTTG  
TGTGACTGAGGGCCAAAGGC

>Glyma20g37450 | Gm20:45340317-45340816 REVERSE

GTGAAGTGAGAGGCTTATGGTCTTGACTTTGGAAAAGAAAATAACACCTTTACCCCAATA  
TAGGCAAGTCACCACCTAGGGTTGAGGAGTGAATTTAAAATGATAAGCTAGGCTTTTAA  
GAAAATAATAATGCAAAACAAGAAGAGATAAAGATGGAGGTAATATCTACCAATCTACTA  
AAAAAAGGGAGGCAATAATTACCAATGAAAAGATGGAACATGAATGGTACGTGGC  
GTGAGTTTTAGATTAGATTATGGTTCCTATTAATTTAACTATTAGAGGTAAGGTGGCCA  
CAAATGATAGGTTGATGGGGAAGCAATGAACAGAAGCACAAATAAGTGAAGTACTTTGAAA  
ACTGTTTCCTTATTATAAATATATATATATATATATATATATATATATATATATATAT  
ATTATAAATAAATGATAGTTGTCTCAAGTATAGAATAAAAACCACACTATATAAACT  
AGGCAGAAGAAGAAATGAGT

>Glyma02g16980 | Gm02:15323604-15324103 FORWARD

TAAATAAAGCTAAAAGTTAAAAAATATTTATTACAAAATATATAATAAAAAATGCATTTT  
AAAAAGGAAAATGCAAAACTATAGTTACTGATTAAAAATTAATAAATATTTTTTATAATAC  
TTTCTCAATATATTATAAATATACATATATTTCAATATTAATATTAATTATTATTACAG  
GGCTAAATATTTATTTTTTAAAAATATAGTTGCATTTAGTTTTACCTTTTAAATTTTATA  
CTATTAATTTTATATTTTCATAATTTTTAATATTCTAAAAATAACTTTATTGCCTGTTTA  
TAATAACGTGACAAATATCCATTAATATCACATCACCATGAATGATTCAGAGAAAAGCA  
TTTTAAGAGAAAATAAAATTGACGAGAAAAGAAAATAATAAAAAGAAATTTAAAAGAATTA  
AACCAAAATTTAAGTGCATTGATTAACGTTAAAAACACATTATACACGATATTTAATACTG  
CCATTCACGAATAAAAAGCG

>Glyma19g33420 | Gm19:41051403-41051902 REVERSE

AACATAAATTTTAAAAACATAATATTTTTTTAATTTAATTTAATAACCCAAACCAAATCA  
ACACAATGTTAATTGATTTTTTTTTAAAAGAAAAGGGGAAAAGCCACAACACTGTGTTTA  
TTGATGTAATTTAATTTAATTTGTCTGAAAGTTTTAAACATTAACCTAAATTAATCTAAT  
TAAATATGTTAATTTCAATTTTTACTATTTACCTAAAATTCAAAAAGATCAACCCTT  
CAGCCTGAACCTCCACAACAAAAGGGGAAGAACTTTACATAATTTTGGTACTAATATT



GGTGAGACAAAACCAAAGCAAGCATGTTGACAATCACTGAGGAATCCACGTGTGCCTT  
CTCTCCTTCATTGGTAGCTGAACAAAAACACACGACACAACAACGTTTTTCATTTCCATT  
TTAGTTTCAACTCAAACCCCTTCCAATTCCAACTCAGTTGTATTCCCTCTCAAATTGAA  
CTAAATCAAACCAAACCATC

>Glyma15g01010 | Gm15:615170-615669 FORWARD

AAATAAATGGATTTAATTTATGTTAAATTTTTAATATTTAATGATGATTTTTTATCGT  
CCAAAGTTGAAATCAGGTTAAGTTTACATATTTTTAAAGTGAGAAGACTAGATTAATTC  
TTATGAGAAGTATTGGATAGAAAATTTAATTTGATTTTTATAATTAATGTTAATAGCT  
AAATTAACCTATAAATTAATTAATTGAGATTTATAAAAAAGACTAAAATTGTATTATACT  
GTACTCGTATCATAATTCTAACATGATTTAATTTGAAGTAAGTATTTTTTATTTATT  
AATTAATATCTTAACCAATATTCTAATCATAACTACTGGTATTAATTAATAAAAAAAG  
AGAACTTTTAACTATCTTTATTTTATTTTGAATTCCTTAATCATGATTCTGAAAAGTA  
CAAAGAGTTATAAATTTCTGTTGTGTGGCTGTTTCGTCCTCGTGGAATGCTTTAAATAGGA  
GTATTAGCATTCCCGTGACA

>Glyma08g22720 | Gm08:17236246-17236745 REVERSE

ATAAATTATTCTGTAGAATCAAATTAATGAGGCGTTTCGATTGTGTTGAAAGCATATAAG  
TCAAAGATTAATAATATTATTATAGTAATTTATTTAAGCTATCAGAAAAATTTAAATTT  
CTAATTAGTTTTATTTATTTTAAATTTAAAATATAAGAATACATTAAACTATAAGTTT  
TATTTAAACAATTTTACTATATTTTAAATTGAAGCTTAGGGGTAAGGTATGCATTAATGG  
GAGGATGAACAAGAATTAATAATTAATGTGGTCCAAGGCTTTAAATAGTGGTACATGTAC  
AATATAAGAGAGGGAGGAAGTGGAACACAAAACCTGTAACCTATAACCCCAAGAAAA  
AGAAGAAGAAAGAAAGTTGAAGTGGTTTGAAGTTAGCTGAGAAGAGGGTGCTCCATTAAGG  
GCCACTCTCATCAAACTTTGATCATCAAATCCATTTAAGTGAATTGGTTGAATCTGCCA  
AAACGGGTCTCCCTCTGTGG

>Glyma13g28390 | Gm13:31421237-31421736 FORWARD

TCAATAATGAATAACTTTTTAAATAAATATTCTAAAGATTAACAATAATGGAAGAACTT  
AAATATATATACTATCATATCACCCTGAATGTATTGACCAATTGATATATAATTGTT  
TTAACTTAAATAATGACATTAATTTCAAGTCTTAAATATATTTTTTTATTGAATTTAAGT  
TTTACCGTTATAGGATTATGTAAGTTTACTCAGCTAAATTGTCACTAATAAAGTCTAAGA  
TAGTATTTGATAAACTAAAATGAAATGAAAAAGTGAATTAATATGAATTCTACCTCAT  
TATATCATTCAATTAACCTTTTTTTTTTCAATTGTTTTTCACTCTATCAAATGGAGGATA  
AGATGTAATAAAGTTTAGAACATTTAGCGTGTAAATATTATTGGTACAAGTGGTGAAGT  
GGAGGGATAGAGCCATAGATGAGGCGGGAATGAGTAATGTGTAACAAATAGTTAGGAAT  
GAATGCTATAAATAAGAGAGA

>Glyma15g10660 | Gm15:7747307-7747806 REVERSE

ATGTATAGTAAAAGTTTAGAACATTTAGAAATTTATTAAGTAATTTCATTAAAGCATAAAA  
AAAATCAAATCAAGACAGATTAATCCAGGTACCTATACTCTTATTTCTATTTAAAATAA  
TTTCTTAATGTATTGGTTCCGTTCCGTTGCACAAAAATAAAGCGGAAAAAAGTAATGAAATA  
AATCGTAAACGAGATAAAAATTCACATGTTTACACCTAAGTTTTTCATTTGAATTCACATTG  
ATTCTATTTTAAAGTGTGATATTATTATTGGTAGAAGTGAACAAGTGTGAGAATTGGAG  
GGATAGAGGAGGCGGGAATGAGTAATGTTCAACTAATAGCTATAAATAAGAGAGAGAAGT  
GGTAGTGGGGTCCGTAATAGTGCAAGAAAAATAATTTGCTTCTCTCTCTGCTTTTCTCAC  
AAGGTATCCTCTTCATTTCTGCTACTCCTTGATTGAGCAATAATGTTATATATAAAAATA  
TTACTATAAGGTAACATAAC

>Glyma07g01840 | Gm07:1226063-1226562 REVERSE

TATGGCCTTAGATACAGCAGACATACAACCACGAAATAAGTATAAAAATTTGACAAAGT  
AGGATATTTTTACCTATAATTACAAAACCTGTTTTCAATAAAGCGCAAGGACGTAATCC  
ATCAATTTCCGTATATCCATCCATGTGAAGTGTGAAGAAAATATGATGTTAGTGGTGATA  
TATATAATAAAACATTCAAACGTGCAAATACCATTCAAGAAGATACTTTCCCCCTAGTG  
CTTACGAAGTGCCCTTTCTTGACACGATTTCACTCTCAAGTGCATGCAATGCAACATT  
CGAATTTGCCACCAGCTGCTCCACCCTCAATGATGAAAAGGAAAAGGCGAAGCTTTTTG  
TCTTGTGCTTCTCACTTCATAGATCCTAGACACCTGACATCTTTTCTCTGCTATAAAACC  
CTTCTCTCCCACCTCCATATCATGTTCAACCACCATAACAACCTTTCTCTGCCTATTT  
TCTCCACTTCTTCTTCTCT

>Glyma10g02820 | Gm10:2014142-2014641 REVERSE

TTGTTTGTTCGCAAATAATGTTCTTGCATTTAAGACATCATAAGACGATGTTTTAGTCT

GATGTGCGTTTGACTTCAAACCTCCACATAAAAAATTGTTTTGGTAGAATAGAGAAGCTTAG  
CATGTAGAGTAAGACTCTTTATGACATCAAATAAATTGAGACTACATTATTCATATTTTTG  
TCCTAACAAAAATGAAATAAATAAATTTTTGTATATTTCTGTGTCATCTAAAGATAAAGG  
CTATACATGTGCCAAAAAGTGACAAACTTTTTTTTTCCCTCCAATTATCAGGGGAAATAG  
AAGTATCTTTTAGGTCACTTCTTAATAATGATACAAAACATTCACCAACTTTATTAATAA  
TTAATATAGGTCACAAATTAATAAGAGAAATTTAAAAGAATTAACAACAGATTTTAAGTGC  
ATTGATTAACGTTAAAAACACACACACTATACACGTTATTTAATACTCACTAATAAAAAG  
CGAAGGGGTTTTCCGAGTTTT

>Glyma07g37220 | Gm07:42357045-42357544 REVERSE

AAGTTATAAGTTATAATAAAACAATTGAAAATCAACCTTTTTTAATATTTGGTCAACAT  
AAACATACTAACATAGGTACAGTAAAATCCAAAACCTTATAGGTGAGCTGTGTGCGAAGT  
GTAAGATTTAAGATGAGGGGTTAGTTCCTTCTATGAATGAGCTGGATCCACTCTTTCAGG  
AGCCAGTGATACCCAACCTTTGAATATATACTTCTCTAACTTCTAACGTCACAAATAAA  
CAAATAAACCCACAACCTATTATCATAAAATTTACTACTATTACAATAAAAAATTTTAC  
TGTATAACATTAATTCCTTGTTTTTAAAAAATTTAAAACACCCAATAAGAAAAACAATC  
TTCTTAATCCTACCGATTAGTAAAGCTTTTTATTGCTATTAATTAAGAATAATTAATG  
CCCGAGAAATTCAGCGTGTAACAGTGACAAGGCGAGGACATAAGCTTGAGGCGCAGAAC  
AATAGTTATTGTTTTATAAA

>Glyma05g01730 | Gm05:1209130-1209629 REVERSE

CCAACATATTGGAGATGTATGGTGACTATAATGAGGAGCTCTCTATGACTACGTTGATT  
CATCGGAGATTATAGGATTTAATCATCGGTTCAAAGAGTCGAAAGGAAGTGGTGAAGTGA  
GTAGTGAAAATGATTTTAAATGAAAATAATAACATGACTTCTTAGATTTAAGTGATTAG  
ACTTGATGATATAACATTTTGTATCACGTTATCACTTAACAAAACCAACAAAATACCT  
TTTTTTTTAATATAAATTGAGAAAAATAAATTTTAAATAATAACTTAAAAACAACAT  
AATTTTTAATATGAAAATCATATTTAAGTCTTTATTAATTAACAATAATATGTCATAA  
TAAAATAAGATTTTGATATTGACGTGAGAAGAGACAAGTGGAGGTGGCATAATCGCTTG  
TCATGGATTTGCAAAGATCTCTCAGATTTGGATCCTCCGAATCTATCGTCTTTATTATT  
TCTGTAACCTTTACTTTTT

>Glyma03g28570 | Gm03:36492239-36492738 REVERSE

ATCAACTATTAATAATAAGAAATGGTAACAAAAAATCTTAAATTTATGTGACTACC  
TTATTTGTTTTTTTTGGCTTTGAATAAAACAAAATTAGTTGGGTAAGTGGCTCAAATAGAA  
AAAAGAGTGGTGGATGGATGTGCATGACATGAAAGATGGTTAAGATGCATGAATTAGAT  
AGATGGATGGGCATGGGAAGCAAATCTTAAAAGGGAATCAAAGAAATTTGGCTCTCTTT  
GCCACCACTCTCCCCACCTGCCAAGATATGGTAAGCGCCACATGATTTACACCCAGG  
GGAAAATAAAAAGGCACCATTGCTGACCTCACCTGTATCTCTTGAAGGGATTTTTATGGC  
CCCACCTTCTCTCCTCTCCCTCTCTCTCTCTCTCTCTCTTTTGCCTTCATCCTACTTTT  
TAATTTTTCACATCCCATTTCTCTCCTTATGTTGTTATATACATATAAATAAAGG  
GTCACCTCCCCTCTCTCAAC

>Glyma14g13320 | Gm14:12642628-12643127 REVERSE

AAAGATAAGATATCTGTAATTTGGTGTCTAAATTCTAAAGGGAAGAATCATAATGTTTC  
CGTTTTCTGAGCGCGTGACACAACGCGTCAAATTTTCTGGGAAAATTTGAATTGAA  
TTGGCGATTTTCTGTTCTAACGAGAAAGGAAGGTCCATCATCACCATCTTCATAATAA  
TTCGGTCAATCTTACGTTGTTAATTCAAACCTTCACTGTACACACACACCACCACACAT  
TTTAGTTCAAGATTCTGTATCTTTCTCATTCACTGTGTACACAACAGATAACACAAAA  
AAAAAAACTTTTTAATTGTTCTCTCTTTCCCTTCATCACTCCTACTTTTTCTCCCTGT  
CAACGATATTCTTCCTTAAAATCTTCTTTTTCTTTCTTTCTTTCTTTCTTTGGGGTTCTGTA  
CGTGTTCATAGATTCTGTTCTGGGGTTTTTGGCTTCGAGACCCTTTTGAAGAAAATGA  
CCGTGGTGGAGGATCATAGA

>Glyma02g03140 | Gm02:2438347-2438846 REVERSE

ATTGACCAAATCTCGCGAAATATCGTAGACGTGTCATTAATGCCTTACTTAGTAGCATA  
GTTTAGGGGATCAGAAAAAATGTATATCGAGATCACGCACCAAAGTGGATTTGAGAATCT  
CAGTGCCATCTTCCAAAAACATAAATAAAAAGAGAAGATTTAAGATTTGATCTTTCCA  
AAAGAGACTTTATTATATTTTTTAATGGAGGAATATGTTAAATTTATTAATGAGAGAT  
TAATGTTAATAATCCAAGAATAAATAGTGAGTAATTATCACTAACCAATAAATAAATA  
TGATTCATCATTAAATAAATAGCTTATCTATGTATACAGTTCAACCTTACACAATTATA

CAAACCTCTTTAGCTTAATTTTTTTTATTATTAAGAAAAAATAAAAAATAAAAAAGAGCGG  
TGACAGATGGATATAAAACAACAACGACAACAACATCAACATAACATGTACATTACTAC  
ATTACATTAACATTTATATC

>Glyma04g40100 | Gm04:46232756-46233255 FORWARD

TAAAAGGAGGTAATTAATTAATATAGCCATGAGGGTGGGTAGTATTTAGATTTTTGCGTTT  
AAGAATATACTACTACTATCTTATAGGAGAGGAGACAGACGGTGTGAGCATCTCACAAAC  
GTGCATGAATGCTGAGATCAGAGTGCAGACAGTGATGCTGAAATCTCGTCATGAGAGACA  
AAAAATTAAGACAGAACTATAAATGAAATGAGAGAGATGAATTGATGATGGATGAGATG  
AGAGTGTAGGCTTTGTTTTGAATACGCGAGCTAGGTGGGGACTGAATCAAATCCTAGATA  
CCCCAAAAGGATCACGATATATCTGTGACTAGATTTTTATCTCTCAGATATAAAGTCTGA  
TTCTCTCTCTCTCTCTCTCTCTGGTTTTTCTAAAATTCTTCGCCACCAATCACCT  
TCGAATTCATATCCATTTACTCTCTCTCTGTGTAAGTGTACATATATATAGGATATCG  
GTTACGTTCATACAACCTTT

>Glyma03g32720 | Gm03:40509962-40510461 FORWARD

GGCTCAATTAGAAGGAAGTTATAACTTATGAGTTTGGCATACTTGCTCGTTTTTCATGCC  
AAGAAACGAAAGGCAAATAACGAAAGGACCCCAAAAATATACTTCAAATTTGATTGTCT  
TCTTGTCTAGTTTAAAATAGAAAAAGGTAGCCTACGAATTTATTCAAGATAGGAATCAT  
CCCCATTTTTGAAAAATATCACTCTCCCTCAGATTTTTAGATTGTGAACGAAATCCAGA  
GACACTTCCACAAATTCAATGTTGATGCTAACTCACATCCAATTTGGTACTTCTTTTTT  
CTTTTTCTTTTTTTTTGAACAGCTCCAATTTGGTACTTTGATAATTCTTTTCGATCCATT  
AATTTCTTTCAATCTTATATCACACCTTACTGAATTATCCACATCACATGGGAAGGATA  
TATACGTATCATTTCATATTTTTATTTATTTATTTATCTATATATATAGCACCCCACT  
AGCTAGCTATACATCATCCA

>Glyma04g40640 | Gm04:46635232-46635731 REVERSE

ACCTTAATATCTTTCTGCCGGCGGGGCCACACCCTCCACATGAAATTGGGATATTTTA  
TTAGATTTTTGGATTTGGATGGGAAGCCAACTAATACGAACCAAAGAAAAAATATATAAA  
AGTGGGTGAAAAAATATCCACCACCAGAACCAATGGCTTTTTGGCTTTGGATCTTTGGTC  
GAAATCAGATCTGATTGCTGACGTGGATCATGTGCGCCAGCATGTCCTAGTGTCTAGAT  
ATTTTCTGAAACCAGGATATTTTCGGTAGCCGTTGGATCCGAGGGCTTTAACGTTGGTG  
TCTCATCCCACGCCGTTTCGATCAGTCCGATGTTAACTTAACGGTGTCTCTCTGTCCACC  
CTTGCTTCCATATATCGCCTTTTTCTTTCTTGCTTTTTTATTTTTTACCCTCCAACTTC  
GATGCGAGATATTGTGTGCTTGCTTAGAGAGGTTTTGGTTCCGCAGAAGATTCTGAATTC  
TGATGCTCTAGTGCGATTCC

>Glyma06g06730 | Gm06:4812256-4812755 REVERSE

TAATAAAAAATAACATTTTAAATTTAAGCATTTTTTTTATATTTAGTCTTAATTTATTTGA  
AAAATAAATTGTTGTGTTTAAATCTAAATATTGTGGGTTTTCGATAAAATTAGATATAGA  
ATAATCTTAAAATTAGAAACAAAAAATTAGTAAAAATTAGCCAAAAAATTACAAGACAC  
GACACTAAGATTTGAAGGCAAAAACCTTTGAGAATTTTGTAGTTTGAATAAATTTGATGT  
TTTGTAATGAGTTTGGAGTAAAAGACAATTTAATTAATTTCAATTTGCATGAACAACAC  
CACTTCAACTTCCACCCGACCCACCATAATGGATTAGGAACAGGAACCCACAATAATAG  
CTCTCTCAGTCCATATACAGTCACAGATTCCATCACTTTTCGCGTTCTATTGTTGCACGCT  
GACACACATAAGCACAAAAGACACCAACTTTTTCGCTCCTTCTTGCATTTATTCAT  
TCACATTCTCTCAAACTT

>Glyma17g10170 | Gm17:7595912-7596411 FORWARD

CAATAAGAACAATAATAAACTCTTTATTAATCAGCTCAAATAAGTGATGGAGTTTAACT  
TAATTGATTAACCAAATAGATAAATTATTATAAATTTTTAATACCTGTCTTTAATTTGTA  
TGGAATAAATCAGCTTCAATAAAATTCTCTTATAAAAATATATTTAATTTGTAATAAAT  
AAATAAATAAAGTGGCATTGCCAAGTCAAACCGGCATTGCGAAGCCGCGGCAAGAAC  
AGGGACACTGGCCCAAGCGAGATACGTTTGGCCTCCTCTGACCGTGACCAACGTTACTA  
TCTATTTAATTAATTAATAATGAAAACAATACGTAATAATAAAAGTAAGGTTTTGATAT  
TGACGTGAGAAGAGACAAGTGGAGGTGGCATAATCGCTTGTGCATGGATTTGCAAAGATCT  
CTCAGATTTGGATCCTCCGAATCTATCGCCTTTATTATTTTCTTTAACCTTTACTTTTC  
ATCTCACCATTTATTTA

>Glyma09g14650 | Gm09:16734939-16735438 FORWARD

TTTATTTATCACAATAGAAATTATTCAAATAAACATTATACCAGTTTACCAAAAATAAA  
ACATTGTAATAGTGACAGACAAAAGTTAACACCGGATATATTTGTTACACTTTTTATAC

TTTCGGAGATTAAGTTTTGTATTTTTATCTTCAAGGACATATTTGTTGATAAATTACAC  
ATTTAAAGATAAAAATGATTATTTATCATAAAAAATCTCACTAACTAGAATTAGTAAGAA  
ATTAATTAAGAAATTAAAAAAAATCTCGTGTGAAAATTATGAAAAAAATATAAAAACT  
ATAAATAATAATTCTATATATTTTAATAAAAACATTTTAATGAATATTTTTTTAATT  
TTTTAATTAATATTTTAAAGGCATTAATTAAGTCAAAGGCTTCTTCCCCCTGTTTTT  
TTTTTTTTGGAAGAAGTGAAGGACAAATAACAGCAGAGAGATATTTGCTAAAATAC  
TTCAAAGATTTTATGTTTT

>Glyma04g06650 | Gm04:5106420-5106919 REVERSE

TTAACGAATGAGATGGATCCACAGTTTTTCTAAAAGACAAGATGGGATTTACAAATCAA  
TTATAAAAATATCATTTAACAGGAGAATCTCATTTTTTTTATTTTCTTATTTTAAAG  
TACTAGAAATTTATCCAAAGATGTGATTTAATTTGCATGAACAACCCACCATAATGTATT  
AGGAACAGGAACACACAATAATAGCTCATTCTTTCACTCTCCCATAGTCCATATATAGTC  
ACAGATTCCATCACTTTACGTTCTACTGTTGCACGCTGACACACACAAATAAGCACAAA  
AAGACCAACTTTTTCGCTCCTTCTTCCATTTATTGTTCTTTCAATTATTCATTACAT  
TCCCCTCAGAAATTAATTTCTTCTCACAAAATAACAATTTTTTTGTTGTTTTCTGT  
CTCCTCTGTTTCATAGCTTCAGGTTTTGGTTTTCCAGACCCACAAAACAGAGTTCAAGTG  
TGTAAGATTGAAGAAGAAA

>Glyma08g10650 | Gm08:7742663-7743162 FORWARD

NNNNNNNNNNNNNNNNNNNNNNNNNNNNNNNNNNNNNNNNNNNNNNNNNNNNNNNNNN  
CTTGTGCAATTTGATTCTGAGGTTTTAGAATTTACTGCCTCCTACACACATGGTTACCATT  
GGTAATTATGTGTTACCATATGTCAGCATTAGTGTGAGGATAGTGGAATTTGAGA  
TTAGTTCCTATAAAAATATATCAAGTAACTGAATTAATCTGAACAAAACAAACTCTGTGTACA  
CTTTTTGTGGCGTTTTAGAA

>Glyma17g03380 | Gm17:2254781-2255280 FORWARD

ACCTATGTACATGTTATCTAAAATAAAAAATTAATAATTAATAATTAAAAAAGTGTT  
ACTTACTGTTTTAAAGGTATTAATAATAATGAACATTAATATATTAATTTAAAATTAATA  
ATATAATAACTACTTTATTTTTAAAATTATGGGTAAACATAAACATAGGTACAGTAAAT  
CCAAAACCTAGTATCGGAAGTGATGAGTGTAGATTTAAGATGAGGGGTTAGTTCCTTCTA  
TGAATGAGCTGGATCCACTCTTTTCAGGAGCCACTGAGACCCAACCTTGAATATCAATAG  
TAGTCACAAATAAACTTTAAAATAAAAAACAAATCTTCTTAATCCGACTGATTAGTAA  
AGCTTTTATCGCTTCTAATTAAGAATAAATAATGCCCGAGAAATTCAGCGTGTAACAG  
CGACAAGGCGAGGACATAAGTTTTGAGGCGCAGAACAATAGTTATTGTTTTTATAAAAA  
AAAATTCTGACCCAAAATTC

>Glyma15g24770 | Gm15:25945167-25945666 REVERSE

TTTGTGAAAATCATGTCGTTAGTTTTGGTTAGGTGGGCATAGTGGGGGAGTTGGGAG  
AGGCATTTGCAATTGATCAGTTGGGCACATGAATGAGCATTACCATATCAGTCCCAAAG  
GGTGTAAATTGGGAACATGTCATCACTCTGGCATTGGCGTGAAGAGGAGAGAGAAATTGGA  
GAGAATGTGATATATAAAAAAGGATTTCTCCTAATCAGGAGAGTTCTTAACATAATAGTT  
AAAAATTAACTGAAAAAATATTTATTGTAAAAATTATAAGAGAATATGAAAAAATATCA  
ACAACAATAATTTTTTATATTTAATAAAAATTTATTTTTAATTCTTTAATTAACATCTT  
AATAACCTTGTTAGCATTTACTTATTA AAAAATA AAAAACAGAGGGTGGTGGTAGCA  
AGATGCATTATTGATTGTGTTTTGCATCAGCGATTAACAATAATTA AAAAAGTCAAAGG  
CTTTTTCCCCTGTTTCTT

>Glyma19g31320 | Gm19:39086969-39087468 REVERSE

TCATTCAAGTATTAATAAAAAAAACAATGATAACAAAAAAATCTTAAATTTATGTGA  
TTACCTTATTTATTTATTTTGCATTGAATAAAACAAAATTAGTTGGGTAAGTGGCTGAA  
ATAGAAAAAGTGGTGGATGGATGTGCATGACATGAAAGATGGTTAGGATGCATGAATTA  
GATGGATGGGCATGGGAAGCAAATCTTAAAAGGGAATCAAAGAAATTGGCCTCTCTTTG  
CCACCCTCTCCCCACCTGCCCAAGATATGGTAAGCGCCACATGATTTACACCCAGGG  
GAAATAAAAAGGCACCATTGCTGACCTCACCTGTATCTCTTGAAGGGATTTTTATGGGCC  
CCACTCTCACTCTCTCTCTCTCTCTCTCTTTTCTCTTTTGCTTCTCCTACTTTCTAAA  
ATTTCAACCCATTTCTCTCACTTATGTTATATAGATATAAATATAAGGGTCACCT

CCCCTCTCTACCCCTCAAC

>Glyma11g04440 | Gm11:3007659-3008158 FORWARD

AATATTAATGCAATACGAAATTTTTTATAAAAAATTAACACAAAAATTAATATATA  
TTAGAAACAAAATATATTTAAATCATGTTTTTTAATCACTTTAACATACATCTTTTA  
TTAGAAAATGAAAGGAAATTATATAATAATGAATATGTCGTAATGATGCAAGACAGAA  
TGAGGTAAATAGACAAAATTCATTGTACAGGAACAACTATTCTGGCGTAAGAAATTCAA  
GAATAAAGTATTAATTTCAATTACAAAGAAGAAGACTCAAATCTTATATAGTAGAAGACA  
ATGCATTTATTTCAACTCAAATATAGGAAACATACCCAAAAAATAAATCAAAAT  
ATAGGTAACAACATCTAATGTTTTTTTTTTTATTATTTTACAGAAAAAATGGTAA  
GAAATGAGGGTAGATTTGGAATGAGCCTTGTAAGACTTTTTTTCTGCATATTATTACGT  
GGTCTTATTAAGGAGCGAT

>Glyma04g29250 | Gm04:33371184-33371683 REVERSE

TCTTTTTTTTTTTATCCACAGTGATTAGGGCATTGAGTTCTGGTGGGACCTGAGATA  
CCCGACAAGCTTCAACTTAACCCTTTGAGTTGATTATGTCACACTTAAAAATTCATTGTC  
TTTCTCCAGATTATGTCTTCTCCAGATTATATGTCATCCCCACGAATTCAGAGTGT  
GTTCTCAAGTGAGTTATAATTATTGAATTCATAATTTTGTCTTTAACCATAAAAAAG  
GGTCAAATAGAATAATAATAATAATAATAATAATAGTAATGAACAAGTCAGATTTTG  
AGTTTGGTACAATAAGAGCACCTTTCTTTGCTTGTTCATTCAAAAATCAACCCAG  
AAGATCCGCCAGATTCTTGATGAAATCTGTCGGATCTTGCTTTCCAACTGTCAGATTTT  
CTTGGTGGCATTGTATCCTTCTCGACTATGATGTGTGCTCCCCCTTTAAATGTGCA  
TGCCACCTCCTTCATCTT

>Glyma04g34820 | Gm04:41064879-41065378 REVERSE

CAAAAGTTAGAAAAAGAAAAAGTATTGGATTGTTCTTAGTAGTTGGTTGGACTTCTCCT  
TAATCCCAAAAAATAAGTAAGACAACCAAATCTCATTTTTTAATAAAAAGCATTCTCAA  
AAATAAATCTTAACCAACTAAAAATCTGTCTCAATCATATTTAATAATTGAAAAAAT  
TAATACGTCAACGTAATTCACGAAATTGTAATAATAAACGTAGGAAGTAAAAAAGGTG  
ATGATCGATCTAGGATCTAGGTACGCGTAATAGATGGTTCAAAATCTGAAGTCTGAACCG  
TGTGAAAGTCAAGATGGCTCTCGGAAGGATGCAGAGAGAGCGAAGGTGGACCCAAAAA  
AGATACGTTTGGTCTTGTCTGACCATCAATAACGTTACTGTTTGTAAATTTTAATAATA  
AAATAAAAAAGAATGATTGTGACAGGAGAAGCGACAAGTGCAGGTGGGATAATCCTCTCT  
GCTTCATTTCCAAAAACAAC

>Glyma13g19870 | Gm13:23357492-23357991 REVERSE

AGAATTCTGATATGGGATTGATGAATATAGGGAAAGAGGTGTGAGTGGGAGAGAGGAGG  
CAGACATAACATGACTTGGAGAGAGGAGGGAAACCTCTGGTATAGGAGTTGTAACCTCTGG  
GGGAAGTGTGCTCTTGTGGGTACAATTTCTGATAATTGAATGATACACCTCATTGTCAT  
TCATCTCTTACTGTTTCTGTGACTCTGTTTGTGGTGTCTATCAGACTAGGATGGAATGC  
TGTTATCACTTGTACTTGTAGTTGCTAGTATATGAAAAAGTAAAGGGCTAGAAACCTC  
ATAACTTAGCATGTCATTCATTAAGACACATCAGTTTCAAATGTTTTAGTAATGAGGTAA  
ACAGTTTAAACGCAACACCACAAGTCATCAGCATACTGGTTTAGGACTAACTTGCCAGT  
ATTGCCATATGGAGTCAATTTCTAATTCTGGTAACCAAAAGCTACTTGACAAGTTCTTT  
GTTATCTCCTGTTGCAGAGC

>Glyma01g40900 | Gm01:52560382-52560881 REVERSE

ACAAAGAAAATACAAAATAAAATTGAAAAGCTTGACAAAATTGAAAAAATAAACAATG  
TTGGTTTGTTCGTAACAAAGTGTATTTAAACCAAATTGCAAAGAGTAAATGCTTTTTT  
ATTATCACTTTTAACATACATCTTTTATTAGAAATGAAGGGAAATTATATATTGATGACT  
ATGTCATAATGATGCAAGACAGAAAGAGGTAATAGAGCACAGGAACAACTAATTTTGG  
AGTAAAAAATCAAGAAATAAAGTACTATTAATTTTCAACTCAAATTATACTGTAGGAAACAA  
ATTTTATATAGTAGAAGACAATGTATTTATTTTCAACTCAAATTATACTGTAGGAAACAA  
CATGTAATTTTTTTTATAGAAAAAATGGTAAGAAATGAGGGTAGATTTGGAAAATGAA  
CCATGATTGACCATAGTGAGAGACTCTTTTTCTGCATATTATGTGGTTCTTAAGGAGCGA  
TGGCAACTGTTCAAGTAGTCA

>Glyma09g04470 | Gm09:3298206-3298705 REVERSE

TCAGGAGTGAACACCCCAACCTTCAAATATAATATTAATAAATTGTCAAAAATAATTACA  
CAACTATCATTTTAATATTATTTTTAGGGGTCTAACTGATTGAATAAATTTGTCAAT  
TTTTAATATTATTTTAATTTTATGGATAAAAAATATATTTTAGTAATAACATATTTT  
TTTTTGATATCTTAATTAATAGTATCATTTTATGGAAGTAATAAATATGCCAGAACT

GAGCATGAGCTTCAAACGGAGGAGAAGGCTTTCAGAATCAGACCCACAATCATTTCATT  
ATTTATATGCTATATTATCTGCAGCCAAATATAAATTCCATTACCCTTTTCTCAGTTTCT  
TCCCCTGAACTCCATAAATAACTCACTCTTGTATTATTTTATGTTTTTCACTTCCATGA  
TGCCAGTTTCAACCATGTGAAGTTGTTGTGTGTGTGCTGTGTTTGTGTTGTACTGTT  
TTGGATCTTCAGAACCAACC

>Glyma19g35470 | Gm19:43059614-43060113 FORWARD

AATCCAGAGACTTCCACAAATTCAATGTTGAAGCTAACTCACATCCAATTTGGTACTT  
TGATAATTCTTTTCGCTCCATTTCCCTTCAATCTTATATCACGCCTTACTCGATCAATTA  
TCCACATGGGAGGGATATACGTGTCAATTTCAATATTTTATTTATCTATCTATCTATA  
TATGTATATAGCACCCCAACTAGCTAGCTTTACATCATCCATTTTCATTCTTCCCCTCC  
TACTCATAATAGTGAGTTTACTCTCAGAATTTGGAGAAAGAGTTCTCATTCAAGTTAGTG  
ATATTGCTACATTATCCTTAAATCTACACAAACATTTAGCAATTAATATATATATAAT  
ATCTTTGTTTAAACAAATTAECTCACTGTATTTTCTTTCAAGTAGTAGTGAGGAGAC  
GTAAAAAGTTACGGAATCCCAAACAAAACCGAATGGCACCTAAAAACTGGGCACCAA  
ATTAACAGCACTTGTGTAG

>Glyma05g27670 | Gm05:33567853-33568352 FORWARD

AGCCTTTTTTTTATTGCATTTTTAAAAGCATGACTCTGTCTTTTTTCTCCTGAGATAACTT  
TTTCAATTGAACAATCTTGTCACTAACTTTTTGTTTATTTTAAATATTAGTATCGCAA  
AGCAAAAACCAACCCAATTTTTCTTCTAATTCTCATCATCTTTGTACATTGAATTTGCC  
ATCTTTTCATAAAATTTAATCTCATCCTCACCATGCTTTTTTCTTTTTTATGTCTTTACT  
CCTTGTACTCAAACAACCTTCTTGTTCCTAGTACAGTACTATTCTTTTCAGCACAAAG  
ATTGGAAGACCATAACGTGCGCCACTGGGACCGTTAATATTCGTTAGTGCTTTTTGTGAG  
TGCATGAAAATATACATATATAAATATACATATATTCCCTTCACCTTAAATTTTAAAT  
AAAACCCAATCAAGCCAACCCCATTTTTCTTGAACTCACAAGCAGTGATCCACAGGAC  
TCGTCTCTCTAACTAACAAC

>Glyma04g42680 | Gm04:48369298-48369797 FORWARD

GTTGAGAAAATTAAGAGGAAAGTAATGGCGGTTTAATTAGTTAGGAAAGAAGGGTTGTTG  
CTTTAATTTTCAAAGTGATGCTCATATAATTAGAATAGGGTCTGCTAACCATTAATTA  
GAAAAAAATATTTATTATAAAAATTAGAGAAAAAAATTAATAAATTGATTATAATTT  
TATGATTTTCAATAAAAATATTTTTTCAATTCCTTAATCAATATTTTCATAACACTAATT  
ATTGAAATAAAGGCAATACTATCCGCACCCAAATTCAACCTTCTTCCATCATCATGAT  
GACCGAATGGAACAAGATCTTGTGGTTTTTCTTAGCAATCAAATAAATCCAATTGAA  
AGGGGAAAGAGAGAGAAAGTTTATGTGTGTGGTGGTTGTACCAACGCGGTAGAGAGAATC  
TAGGGAGAAGATCTCAGCATGAAGGCACACATAAATAAACAATCATCCATGCCACTGT  
GCCACCACAGTTTTTTCTCT

>Glyma07g26890 | Gm07:29691032-29691531 FORWARD

CATTAAGAGGTGTAATAATTATGTTGTTGTGACTTTTTTTTACATTTTTATATAATTTT  
ATAATAGATATTTTATTTAATTTTTTAATTAATGTTTTAAAGACATAGGTTACCAAAT  
TTTAAAGACAATAATTTTTTTTTATAATCAAGAGATATTTTTGACTTTTTATTTAACA  
TTCAATTAATTTCTTCTATCAGATCTTTATTTTAGGATAAAAATATATCTTTAATTG  
TAATTTTATGTTAAGTTAATTATCAAACCTAAAACCTCAATTTAAGAATAAAGCATCA  
AACCATTGATAATAATTAAGAAAAGAAGAATATAGTATTTAATATTAATAATATATT  
TTTCTCAAAAATAATTAATAATGTATTTAATCATTTAATTTGGCGTGATCTATTTATTA  
AATATCTTTCCAACCATTTATCATTTTTCGTCCCCTGAAATTTCCCATTCGCACCTTTCC  
ATTTTTCTTCAGTCCCTCC

>Glyma05g00880 | Gm05:506430-506929 REVERSE

ATTTCTATTTCTCTTCTCTCCCTTCTTTCCACGTCACCCTCTACCCTTTTTGCTATCCTA  
CGCCCCCTTCTCTTCTCCTTCTTTCGCACCTTAGCTCCCACCACCATCTATTTGGTATTT  
TTTTCCCCTCAGATTCAAATCCCAATCAATCCCTAGCACATAAAACTCTCATGTTTGT  
CTCACAACCTCACTACTGGCTCAAAAAAAGTTTGATTTTTTTTTTTGGTTTGGAGCTGCTA  
ACGTGCGCGTCTCTCCCAGACCTGGATTTTGTGATGCTACAACGATCAGCGGATATGA  
ACAAATGGGTTTTGAGTTTTATGTGTCTTACTGGGGGTGTGGTTGCAAGATTTGATTTT  
GTATGGAGCTTTAGTATTGGGTTGTTGTTGTTGTTTTTTGTTTGTAGTACAGGGAAGAGTGG  
TCACGATGGATGCTGAAACTGAGACTGAGGAACTTATAAATTTGAACGATAAATCAAGTA  
ACTTTGGTGGGAATAATAGT

>Glyma06g19870 | Gm06:16215744-16216243 FORWARD

AATTAATAATCTGTCTGAATAATATTTTGATAATTGAAAAATTAATTCGCAACGTAAT  
TCCACGAAATTGCAATAATAATAAAAGCAGGTAAAAAGCGTGATGATCCAATCAAATCC  
AAATCCAAATCCAAATCCAATACTAGGTACGCGTAGATGGTTTCAAATGTAACTGT  
GTGAAAGTGAAAGTAACTGTGTGAAAGTCAAAGATGGCTCTCGGAAGGAAGGAAACAG  
AGAGAGCGAAGGTGGACCCGAACAAGATACGTTTGGTCGTGTCTGACCATCAACAATGTT  
ACTGTTAATGTTTTTTTTTTTTAAAGATAAAAAAGTATGATTGTGACAGGAGAAGCGAC  
AAGTGCAGGTGGGATAATCCTCTCTGCTTCATTTCCAAAAACAACAACAAGATCTCTCA  
GATTCGATCCTCCGAATCTCCCTCTTTTCATTTTCACATTCTTATTATTATTATTCAC  
CCTTTCCCTAACTTACC

>Glyma07g05530 | Gm07:4170107-4170606 REVERSE

CTACAAATTATTTAAATAATTCTTGTCTTAAGTTTTAAAAATTTAAAAATAAATTGA  
CTCAATTTAAGAATTTGAGAATCAAATTAATTTTTAAATTTTTTAAAGAATAAATTAA  
TTTAGTTAAAAATTTGAGGATCAAATTAATCTTTAAAAATCAAATTAAGTCATTTAA  
AATAATTTAGAAAATAAATTAATTTAAATAAATAAATAAACCTAAATATAATTAATGTA  
GCAAAAAGAGAATGTGAAAATGAAGAAAGGAACAAGAAAAAAAACCTGAATTAATTTGGG  
ATGCTCCACGTGTTAGGCTGTACACCACGAGATCAAAGTATTATAAAATAAAAACCGGAT  
ATGACTGTGCAGAAAAATATCGGCCGGGAGAGAAGACGTAGCGTCGCCACATGTCCATTG  
GGTGGACCCCATGTGCAAATATTAATAAATAAACGGATGGTTGAAATGGTGCCACGTCAT  
GACGAGAGTAGCGATGATCT

>Glyma15g15520 | Gm15:11936641-11937140 REVERSE

AAAAATAATTACACAACACTAGCATTTAATATTACGTTAAAGAGTATAAATTAATTGAT  
TGAATAAAATATATTAATTTAATTGTTATAAATTTTTAACATTATTTTCTATTTTACGT  
ATGCAATTTTTTTATATTTAATAGTAGTGTCATTTTATGGAAAGTAATAAAATATGCC  
AGAACTGAGCATCGGCTTGAACAGAGAAGGCTTTCAGAATCGGCTTGAATCAGACCCA  
CAATCATTTCCATTATTTATATGCTATATTATCTGCAGCCAAAAATAAATTCATTACCC  
TTTTCTCTGTTCCCTCCCTGAACTCCTTAAACAACCTCACTCTTTTATTATTATTATTAT  
TATTATTATTATTATTATTATTATTATTATTATTATTTTGTGTTTCACTACTTCCAT  
GATGCCAGTTTCAACCATGTGAAGTTGTTGTGCGTGCTGTGTTTGTGTTGTACTGTT  
TTGGACCTTCAGAACCAACC

>Glyma11g21650 | Gm11:18788152-18788651 REVERSE

TTTAAAAAATTACTTCAATTAGTGTTAAAAAATTAGAAATTATTTAAAAAATTATT  
TATTGAAATATACTTATTCATTTCAATAATTAACATAAATATCTCGTAGAACATAGTTTA  
AACTTATTACATCTCCTCAAGAGTGATTTTTTTAGAAATCAAATCAATATTCTCTAG  
TAGCGTGTGTTATCAATTGAATTATATTTATTCATTTCAATAATTTTGTCTTTAACAATA  
AGCAAAAGGGTCAAATAGAATAATAATAATAATAATAGTAATAAACAAGTCAGATTTT  
GAGTTTGGTACAATAAACAGCACCTTTCTTTGCTTGTGTTTTCAATTCAAAAATCAACCC  
AGAAGATCCGCCAGATTCTTGATGAAATCTGTGCGATCTTGCTTTCAAATGTGAGATT  
TCCTTGGTGGATTTTTGTATCCTTCTTGACCATGATGTGTGCCCCCTTTTAAAAATGTGCA  
TGCCACCTCCTTCATCTC

>Glyma06g12100 | Gm06:9319364-9319863 REVERSE

TAATTTCTTAAAGTATTGATTAGCATGACCGATTAGAATAAGCCAATACTATCCACACCC  
CAAATTC AACCTGCTTTCCATCATGATGATGACCGAATGGGAACAAAGATCTTGGGTTTT  
TTCTTAGCAATCAAATAAAATCCAATTGAAAGGGAAAAGAGAGAGAGATTTTTATGTG  
TGGTGGTTGTACCAACGCGGTAGAGAGAATCTAGGGAGAAAGATCTCAGCATGAAGGCA  
CACACAAAATAAACCCACATCCATGCCACTGTGCCACCACAGTTTTTTTTTTCTCATGC  
ACCCACTAATAGCAAACCAAAAAAAAAAAAAAGAAAAAGAAAAGCTAAGAGGGATAATTA  
CATTCCACCTCTCTCCTTCCAATTCTCGCTCTGTCTCTTTCTTTCTTCTCTCTCTCC  
GTGCGTGGCACTGGTCATGAATTACTGATATATATTTATATTTTAAACCACCTATATATAT  
TGTAAGAAAACACAGATAGT

>Glyma15g37770 | Gm15:43726912-43727411 FORWARD

GTCCAAGACTCCTAGTTGTCTTTAAATTTGAAAAGGACAAACAAGTCAATAGGAAAT  
TATAATTCTTGCTAGTATTTCTAGTAAATGGGGTTAAGTGCAAAGCACTAAGCAGGTCAT  
GCACATGCATGAATGGTATATATAAAGATTTTTTTCTGTCTCTAAACAATGCCCTTTAGG  
TCTCATGAAAAGGCAAATGGAATGAAAATAGAAGTATTATCAATATTATAGTAAACCAAC  
TCACCCCAACAGTTGCTTATCATTGGCAAAGGGTCAAACAAAATAATAATGAACAAGTC  
CAATTTTTAAATTTGGTAAAATCCACCACCTCTTTGCTTGTGTTCAATTCAAAAAT

CAACCTAGAAGATCCTTGAGATTCTGGATGAAATCTGTGGGATATCGCTTCCAAACTGT  
CAGATTTCTATGAGGATTATGTATCTTCTTGATCATGATAGGTTCCCATTTAAAATGTC  
ACACTCTCATTCAACTCATT

>Glyma19g44970 | Gm19:50243432-50243931 FORWARD

TTCACCTTAGAATACATAAATACAAAAGATCTTAAAACATTTTCATATAATTAAGTAGAA  
TAAGCAATTTAAGCCTTTTCTGTTATATCAACTGGGTTTTTTTTTTTTTACCAAACAATT  
TGTCTCATTGAAGAAACCATGGCGGGACCACTAATGAGATTTTGGCACGAAACGATTTGC  
ACATTTGTTTGTCAAGTGGGTAAATTTGAACAGAAACAGTGAAATACAAGGTGCACAAGG  
GTTACGTAGATTCAGTTAGAAGTTGCGCGAAAAATAAAAATGCGAAAAAAGAAAACAAT  
GGTGGCACAAGCAGAGACAAATGTAAGCAAGAGAGAAATAATTGAAGTGGTGGTGTGTC  
AGGAGAAACAACAGAGAATCAGGAACGTTCCACGTGTCAGAGTGGCCACCGGGAAATC  
CAAAATGTGGTAGAGCATTACTGACGTGGGCAAAAAAATATCTTTGAGGTTATTATAATTA  
TTTATTGAGTTGCAGGCACGT

>Glyma06g14750 | Gm06:11559595-11560094 REVERSE

TCACCCCGTGATTGGGTGCGCCAAAAATAGATAAAAAAACAACAAAAGAAGATAGAAAG  
CAAAAAATGTGATAAAAAAGTGAGTCTTAAAAGGTCCAGAAATAAAAAATTAAAAAACT  
GAGAGAGAGTGAATTGAGATAAAAAATTTAAATTAATAAAGTGAAAAATATGAATTT  
TTTGTATTCTATCTTATTATTCATTTGGCTCATTTTTGGGTTCTCTTTTTCTACATAGG  
AGCAAATCCTAAAGGAGATAATTAATATAGCCATGAGGGTATTTAGTTTTTTCGTTTTAA  
GCATATACTACTATCTTAGGAGAGGAGACTGGCGGTGTGTGAGCATCTCACAAACGTGCA  
TGAATGCTGAGATCAGAGTGCAGACAGTGATGCTGAAATCTCGTCAAGAGAGACAAAAAT  
TTAAGATAGAACTATAAATGAAATGAGAGAGAGAAAGAGAGATGAATTGATGATAGATG  
AGATGAGAGTGTAGGCTTTG

>Glyma08g40330 | Gm08:40030233-40030732 FORWARD

TTTTTAATCATTATGAATTATGTTTTACCATAAATTGATTA AAAAGTATTCTTAAATATG  
TAATTATTATAAAATTCAATAATTTATATTATAAAAAATCTCTTATATTTAGAAAAAA  
AATTCTTACAATTTTGGTATCTATAAGTAAACGGTCATTC CAAAAAATGAAAAATGAAA  
AGTAAAATTAAGTAATAACTTCGTTTAAAATCTTAATAAAGGCATATTTATGATTTATAA  
CATCAAATATTACACTTTTAGTAAACATTTTTCCCTCTCAATTTTTCAATTGTTAATTTA  
AACTTTTTATGATCTTTTTCTAACAAGTATGAAAAATTTTTATTTCCCTTGTC AAAGTTT  
CCCATAAATGTGTTTCACAAAAAAGTGAAAGAAAAATGACGACGTGACATGATAATTGAT  
AGATTGATAGAAGAACATATCATGTTACATTATTATATTACAATAAGCTGTATTTAAGAT  
CTAAGCACCCAAGTTACGTT

>Glyma13g03560 | Gm13:3560376-3560875 FORWARD

TGAATTTGTTATAACTATTACTTCTAAAACTTATTTTATCAATAACAATCAAATCTTCT  
TATTGAACACAAATCCAATCAATTAATAACATTTGAGAAGAAAAGAAAAGCACTTTAAC  
GAGGTAATTAATAAGAAAGAAGGGTTGCCTTAATTTTCAAAGTCTTTGACAAATATAGTC  
CATTAATCCAATCCACACCGAAAATCAACCCTTTTCCACCATGATGATGATCGAATGGG  
AACAAAGATGTTGGCTTTTTTCTTCTTCCCTCAACATCAAATAAAATCCAATTGAAAG  
TGAAAAGAGAAAAGAAAGTTAGGAGTGATAGTTGAATTAATAAGGTAGAGAATCTAGGG  
TCAAAAGATCATAGCATGAAGCACACAAAGTTTGTCTGTGCCTCAACAGTTTTTCTT  
CCTCTCACGCACCCACTTTTATAGAAAAAAGCTAAAGACAGTTACATGCCACCTCTCATT  
CTCATTCACCATGTTTCTCT

>Glyma17g16360 | Gm17:13036936-13037435 FORWARD

CTTTTTATCTTCATGAGATCTCAATTACTGGGATTGGAAAATTGTCTGTTTGTGTTTT  
GTGAAAGTGGCATCAGCCAATGAGATCTTTGGAACACAAAAGGGGAGGCTTTTGATTCTG  
TTTTGTGTACAAAATGCTTCCAGAAAAATTGGTGGGAATATATGTTTTTGTGATTTACC  
AGCTGTTTCATTGGTGATCAAAGGGCATGGCAGTTTTGATAATTTGATCTGAACCTTGTT  
TTGGGAGTTGATCTTTAGATGGCATGCCAGTGTCTGCATTATGTGTTAGTTATTTGGGC  
CATTTAAACAATTTAAGCATGCAATGAATGGAGTTTGTATGTTTTGTTTTTGTGTT  
TGTTAATCTCACGCTGAATTCTAGCTTACTGAATCAAGCTTGTGATCTCATGGTTGTGCA  
GAAGGAATTAGATGCTGATAAGTGGTATTGATCGATCTGTTACTTTCTGTGGGAGACTGA  
GAAACGATGCCAAGCCAGCT

>Glyma12g07860 | Gm12:5497698-5498197 FORWARD

GAGGTATGGATCTATATTTTTCTATCTTAACTTTTTCAAATTA CTAATTAATTA  
TCAAGTCTATTTTTGTTATGTTTAGTCTGTTAACAATTACCATAAGCAATTA CTAATTA



ATTCCTTATGATATTGTGTATATGTAAATTTGTTTGGGCCCTTGGGTGGAGTACCCTCA  
GGTATAGGGTATTTGGTTTTCTGAATTATGATGGAAAAGCGCTGACTTGACTGATGG  
ATAGGGTTGTGTTTGCAGAAATTGATAGTTCAAGTGCTTGGGATGTGGAGAATCCATGAT  
TCACTTGGGGAGGATATCATGTTCTGTGTTAATTCCTCACAAATGTTTTTGCAGTGTGGT  
TGATATAGGCTGGTCCGATGAACAATAATGTTGGGAAAGGGAAAAAAGTTTTGGCAGAAC  
AAAATCATATGTTTTTGCACAAAAGAGTCTCGAAAATGGAGTAGTTAATGGAGGGGTAG  
CCTCTGGATCATCAACTGAA

>Glyma13g22320 | Gm13:25866825-25867324 REVERSE

TATAAAATGAATATTTTTCTCTTAATACAATGTATTTTCATATTTATTTAAAATTAAGATT  
AAAACCTCTCAATATTAAGAGACATGAGTTACTACTTATATTTATCCTTTTCG  
GTGAAACATCATTGTTGATGTTGAGTATAGACCTCATTGTTGCCTTATGAAGTAAAA  
AAAAGAGAGAGAAAAGAAAATAATAAATAAATAGGTGATGTATTAATTAATAAAGGAAA  
TAAATGGAAAAGAAATGCGGTTTAAATGAATATAATTACCTACCCAAATTATGTCGTTTTCT  
TAACATATTTTTCACACGAAAATATCATCATATCAATCAATCTCGTAGTCGTAGGTGGTT  
TTGTTGAATATAAAAAGGGTAAGCCAGGTGCATTATTGTATTCTGCATTACACACAGGCAA  
TTAACAAATAATTAAGACAAAGACTAACTCTGTTGTGTTGGAAGAAAAAAGTGAACGAC  
AGAGAGAAGAGCAATGCCAT

>Glyma13g26770 | Gm13:29987546-29988045 FORWARD

AAGTCATGCACATGCATGAATGGTATAAAGATTTTTTATTTTTATTTTGTCTCTAAAC  
AATGCCATTTAGGTCTTATGAAAAGGCAAATGGAATGAAAATAGAAGTATTAATTATTAT  
AACAAACCACTCACCCCAACAGTTGCTTATCATTGACAAAAGGGTCAAACAAAATAATA  
ATGAACAAGTCTAGTTTTTAAATTTGGTAAAATTCCACCACCTCCTTTGCTTCTTGTTT  
AATTCAAAATCAACCTAGAAGATCCTTGAGATTCTTGATGAAATCTGTGGGATATCACT  
TTCCAACTGTCAGATTTCTATGAGGATTATGTATCTTCTTGACCATGATGGGTTCCCA  
TTTAAAATGTCACACTCTCATTCCATCACATTACATTATTATTATTCATCTCTATTCC  
TCTTCTTGTCTATTCTTTTATCCAATTCTCTCTTCTGTTGTGGCTAGCTAGCACACA  
ATTATATCTTCCAAGTTATT

>Glyma18g17330 | Gm18:18479551-18480050 REVERSE

ATTTTATCTTAATATTCACAAATTTATATGAAAAAAGATCAGTCACTAATATGATAAA  
AAGTTTTAGATCTTATTTTCATCTCAATTTATTTTACAATAATTATTTTAAAGTAACATT  
GTAATTTGTGATTATACAAGAATGTAATAATTGTTATTAGTACATAGAACTCAATTAATAT  
TATAAGAATCTTATATTTAGAAAATCTTTTACAATTTATTTTTGAAAAATTAAC  
TGTCCTTTTCCAAAACCTGAAAAATTAAAAGTTATGGTAAAAAATAATAAATAATTTTG  
TTAACATCTTTATAAAAGTATATTTATGATTTATAATATTAACATTACAATTTTAGAT  
AGCNNNNNNNNNNNNNNNNNNNNNNNNNNNNNNNNNNNNNNNNNNNNNNNNNNNNNNNNNN  
NNNNNNNNNNNNNNNNNNNNNNNNNNNNNNNNNNNNNNNNNNNNNNNNNNNNNNNNNNCTCTCTCTGTTCACTTT  
TTCTATCCTCGAAGCAAGAA

>Glyma11g37480 | Gm11:38572962-38573461 REVERSE

TAATCTCAACATAATCACATTTAAAAGTTTATTATTCTCTAAAAGTGTATTCTGCAT  
ATATCAAATTAAGTCATCATAAATTTAATATAGGTTGTCAATCGAGTTAGGTTATATAT  
TTTCAATTTAAATTAAGCCGCCAACGTTTTCGGCATTAAACTTAAAAAAACTGCAT  
CACTGTTCTAGTTCCATAATACTAATGTAATGCAATTCTATAACAAGTAGTATAGAAC  
TGAATTGTTGAGCTAGGTAGGACCAAACAAAACCAAAGGGATATATACTAACGTACGCC  
ACAGGGACCGTTAGCTGTGCGGCGCCAATATTCGTTGGTGTGGTGTCTCTCTCTCTCTCT  
CTTCTGTGTCTTTCTTTGATATTTTTTAACTCCTTAACTTATTATAACCCCCACAACA  
AACTCAACCTTTTTTGAACCTACTAACACAAGCACACTGATCCTAGCTTGGCCCTCTAT  
TCTGTGTCTCTCTCGCAAAA

>Glyma05g06070 | Gm05:5630283-5630782 FORWARD

TTGATGAAATATTTACATTACCTTAGTCGAAGATTATTTTCATCGGATAATATTAATGCAC  
GATGATTGGGCACCCAACAACCTTTAAAAGCATTAAATAAACCATTTTTTTAGAGAAATAA  
ATGCATAATAATTATTATGATAAAAAGAACTCCATTAATGGCACTGATGAGGAAAAGACA  
CGTTATACAGTTAAAACCTCTCTAAATCTCTAATACCAATGTCAATAAGATACTATTCCC  
TCTTAACTTTTTTACTATAATGAGTAGTTGTTGACCGTTTTTCTGCAACCATTTTCT  
TCCTTCTCGGTTGATTGATTGGTGTGTTGCTGGTGCCCCAGAAGAAGGGGTAGTGT  
GGAATATTATTAAGCTTTGAACTTTGAAGTTGTGGCAGAAATCATTGACCCTTTTTGAGA  
GACTTACTTACTTGTGGTCCAAAACCTGCTGATGGCAACTGTTCAGTGGTCCAGGAAGCA

CCCTCCAAAGCCAGCATTTA

>Glyma19g35480 | Gm19:43068227-43068726 FORWARD

TGTTGTGTTTGAATACAATTTTGAATGCACGTATAACTCCTCTCTCTATGTTTCTCAGA  
ATCAGTAAATTGATGCTTCTGCGTAAACAACCTAATAAATTGATGCTTCTACGTAATCTA  
CGTGCTTCCAAACATCAACGATTATGAATCAAACTGTAATTCAAGATTGCTTTAGTAT  
TGAGTAATGATAATTTATACATTTTATTATCTTACAACCTTATCTTTCACCCTATTTTTT  
TCTTATTTCTCTACCTTTTTCGTTATATTACATATTATATCTATCATTTTTCTCTATACTT  
TTGTTTTTATCTCTATCTCATCTCCCTATGCTCCAATCCACCCAAAATAGGGTGGAGGT  
TTAACATTTCCGTTTAGTACTTCATATATTTTCATGAAACATTATCTTTGGATACACAT  
ATATCTAATATATTCCCAAAGAACTGTGCTACAGGGAGAAGACAAAAGGAAAAGATTG  
GTGAAGAACAATTAAGTC

>Glyma04g33110 | Gm04:38595069-38595568 REVERSE

AAATTTAATAAGATATTATTCATGAAAAGTGATGGGATATTTTAGACTATACATTACA  
TTGGTTCCTCTTCATTTTGGTGAATGAGAAAGATCTTCAGGTGACGTGGCCGGCTCCCT  
ATCTACCCCACTATCCAGACCACCCACTCCCTCTCTCCTTTTCTATTGCACTTTTTCGA  
CCCTTTCCCTTCCAGTCTCCCTCTTTCCTACGCCACGCCCCCGTGTGCACTGCGCCCCC  
AATCCCCGCGCACGTTAGCTCACCCCTTCTTTCTTAATTCCAATTTAGGCACCGCTTT  
TCGCACGCCCCCAACCAAACAACAAAAAATAGCCGCGTTTTCTTACCATGCTTCG  
CTTCGCGGACCTCTGACTCAATAATAACAATCAGCCACCATCTCCTTTTCCCTTTAGTAT  
CTGCTAACGTGCGCCGTCTCAACGGTGTGTTTGATCTCCCTCAACGATGCTGTTTTATCG  
GAATGAGCAAGTCGAGGAAT

>Glyma06g14150 | Gm06:11155430-11155929 FORWARD

TTAGGGACTAGGGTGGTAAATGAACATGCAGGCCACTTCACGCATTGAATCGTGGACTTT  
CCTCCAACGGAGGAGCGAGTATCCAGCACGAAAGACAGTGGGCGCGTGAGGAGCTCCCC  
TCCTCGTAGATAGCGTTTGACAACCTCAAAGCCACAAAACGAGACTCTCCCTAGGACAG  
AGCCACGTGTCTCGGTGTCGTCCATGTGATACATGGGCAGCCTCAAAGCACTCAAAAATA  
TCTTTGAGAGAGTGGGTTTAAATTAATATCTTTTCTGCCGGCGGGGCCACTCAGCGGCAA  
TTGTCCACACATAAAATATCCACATGAAATGAAATTCGGATATTTTTTGGAAAGAAGCG  
AAGTTAATAAGAACCAAAGAAATAAATAAATAAAAAAGCGGGTGA AAAAATATCCACCAC  
CAAACCCACCACGAGAACCAATGGCTTTTTGGCTTTAGATCTTTGGTCGAAAACAGAA  
TCTCATTGCTGACGTGGATC

>Glyma17g33230 | Gm17:36889810-36890309 FORWARD

AGGAAAAAGATAAAGATACTCTGTAATTTGGTGTCTAAATTCTAAAAAGGAAAGAATCAT  
CATATGTTTCCGTTTTTATGAGCGCGTGCACACAACGCGTCAAATTTTCCAGAAAATTT  
TGAATTGAATTGCCGATTTTCTCGTTCTTACGAGAAAGGAAGGTCCATCATCACGAACTT  
CCATAATTATAATTCGGTCAAATCTCCTCCTTGTAAATCAAATTTTCACTGTACTCA  
CACCACCGCACATTTTATGTTCAAGATTCTGTATCTTTCTCATTCAACTTTGTACACAA  
CACATAAACTCAAATAAAAAACAATTGTTTTTTTTAATTGTTCTCTTTTCTTTCCCT  
TCATCACTCTACTTTTTCCCTTGTCAACGATATTCTTCTTAAAAATCTTTTCTT  
TTTCTCTTTCTTTTCCGGTCTGTGTTTCATAGATTCTGTTCTGGGGTATTGGCTT  
CAAGACCCCTTTGCAAGAAA

>Glyma16g02050 | Gm16:1590480-1590979 REVERSE

GTGGAACGAACCATGCTGTTGTTGCGAGAATGGATGAGTTGAACTGCGCGATGACGACGAC  
GACGACGGAGAATAGCAATGCGGAGCTGGTTCAATGGGAGAGGTTGAGGTTTTGGTGGG  
AAGATATTTCTAACTATTTTACGGCTGTGGTTGTGGGCGAAAGCTGCTTGCCAGAACTG  
AGCAAAGAAGCAAGTAAAGGGCGGTTTGGAAATTGTTACTATTATTTTCTCTTACATG  
TGTTGAGGATGATGATGAAGTCAATTTTCACTCTGTTTTCTTCTTCTTCTTCTTCTTGT  
GGCCGATTAGGGTTATTATTCTTTCTGGCTGTGGAACGAACCATGCTGTTGTTGCGAGAAT  
GGATGAGTTGAACTGCGCGATGACGACGACGACGGAGAATAGCAATGCGGAGCTGGTTC  
AATGGGAGAGGTTGAGGTTTTGGTGGGAAGATATTTCTAACTATTTTACGGCTGTGGTTG  
TGGGCGAAAGCTGCTTGCCA

[Promoter regions\\_1000bp](#)

>Glyma17g33670 | Gm17:37588630-37589629 FORWARD

CCAGAAAAGTTGGACTTCTTCAACAATTCATTGTCATGACATGATTCACAATCATTTATA  
AGGTTGGTTTGCATTTAATGTATTAGTTTTTAATTTGAGGGTGTCCAATTTAAATCCTTA  
TGCCTTTTCTTTGAGTTCTTCTTATTTTTTCTTCTGTTGGGGTGGTTGTTGTTGCTG  
TTGCTGATGCTAATGGTGGATCTTGATTTTGTTTATTGCAATTGAGATCAATCATTCAAT  
CTTCTCTGATTTGTGAAAATGTGTAATAGTTTTGTTTTTGCAATTTGCTAGTGTTC  
TGAAGTTTATTTGTTTTGTGTGATTGAGCTTTAAAAGTCTCAGGTGTGCTTTTTTTTT  
CACTTCCTTCTCGTTATTCTGGATGTCCAGTGTCCAGTTCATTCAACTTTTGTTCAA  
AATTTTCCAATATTTTTTTGAAAATAGTTTAATGCACCAATTCATGATTTCTTAAACA  
GTTAAACTTCTATTCAAGTGTGATTTCTCCGGGGTCCGATGTCACATATATTTCTTCA  
ACTGTTGTCTTAAATCATGTTTTGTACATTCCATATTTCAATTTAGCATGACAT  
AATGACATCAAATCAGTGACCATCTTGTTCGTCTCTTTAACTTTTCTTATTCTTCT  
ATTCTTGGTCCGTTAAAGTCAAGTTCCTGATCTTGGTGGTACTTTCAGTGTACTACTTT  
TGTTTTGGTACATTATTTCTTTTATTCAATCCACTTTCTTAATAGTAATTAATTC  
TATTATTATATCTGTTCCAATTTCTTACAAGAGACTCATCTTGGCCTAACAGATTGCA  
GCTGGCACTAGTGTCTGGCTTATAGATAAAGCCAATAATTTAAACATTGACCAGTGCT  
TCTTGTGATGCAAGTGCTAATGGATTGAAGGAAGAGCTAGTTGAAACCCATAAGTTGAAT  
ATTGTGAAAAGAAATTTGGATGCTATCAGTTTTCTTTCA

>Glyma03g37760 | Gm03:44273343-44274342 FORWARD

GGAATAAGTTTCAATTCTAAGGTCTCTTTTTGAAAGCTATCTTAACTAAGGTTCTACTTG  
GTGTATATAGAGAACCAATTACTTACTAATTCATAAGAGCAACAAACACACTCTTACCA  
CTAGAGCTGACAATTAGCAAATTCAGTTGGAATATGGATATTTTTAAGACGGTGAAGAA  
TATTTTATATTGAATTTTCAATTTTTTGGTACATGGAAATGAGAATATTTATTTAATTT  
TTTTATTTATAGTATTCACAAATTTAGCAAGATTTCTACTTTTTTTAAGAGAGTAA  
AATTTTACTTATACAATAGAAAGATATACAAAAGAAAACCATTGAGTTAGACTTCTGAA  
TCAAGTACAGGTAGCATCAGTTATTTATGTTTATTTTTCTAACATACACTTATTATTTA  
TCAGTCTTAAACATGTGTTACAGGCATATTCTGCGTTGTTAGTTCTTCTCATTGACAT  
CATGCTGGTATGCCATGGTATGCACATAGAGCACCACGTGATTTGAATTCAGAATATG  
TTCTCTCTCAATCCAATCCGAAATGAGCATTCCGCCGGACTGATACACCCTATAAATT  
CGTCCTCAACCAATTTTGCAAACTTTGAGTTCAACTCTCCAAGATACTAACCTTTCAT  
TCTCTGATATCAAGACCAAGGTTATTAATACATTACTTGTCTTCTCACGTAGAAGAA  
TATTAGATGGGTCAGAATTAGAATTATGTGGTTTCAGTCTATCTCTATGTGATACATAAA  
TTATTTTATTTAATTTATGAAAGAGTTAATAATTTATTACACGAGGATTGATTGAGACT  
AAATCATTCCAACCATGTAATAAATTTTACATGAGAAATATTACATTTGAGTTTTGTAT  
GTAACTTTTTATTTGTTCTTGTGTTTGGACTTTGCAGGTGGCTCCGTTATTATTTAAAGCA  
TTTGAGACGGTTCCTAACTTAGCCCAAATTTTCATACATAG

>Glyma06g06240 | Gm06:4468642-4469641 FORWARD

ATTATTTTGAAGCTTAAATTTAAAATATTTTTGAAAAAAAATTAATAAAGGAAAA  
ATTATGTTTAACTTATAAAAAAAATCAAGATATACTTTTAAATTTAAACTTATTATAA  
GGATACGAGGCAGAAATACGCAATTGACATTTGGTGTAAAGATTTAAAGAGAACGATCTAT  
ATTTAAGGAGAGAACTGTACTCTGAAATTTTCTTGAATATGAGGCAGAATTAATAAAGAG  
AACATCACTCACATCACTTGGGAAAGGGCGGGGAACAGCAACGGCTTCGTCAGGATTTTA  
AAAAGAACAACAACATCATAAAATATTCTACTAGTAAATGGTTGTTTGTAGTTAACTAACAC  
CTGAGATGAGACTTTGTTTTTTTTTACATAGGAAAGAAAACCTCTCTCCACCTTGTTAAC  
ATAACATAACATTGTTGCCTCACAAAGACAGGAAATAAACACAACCACAGTTAAGAAAGCC  
AAAAATTTCTCCATCATTTTGCACATACCTCTCTGGGATTCCTTTTTTTATTAAGATTG  
TTCCTTTGTACCTCACATATTTATAAACACATGCTGCCCTCTCCAACCTCCATATGCTAA  
CTGCTTCTCTATATAAATAGAGAGTTTCTTCCAATTCCAAAGTGAATTTCTGTA  
AATTAATCAATCTATGCACCACAGTTTTTGGAGAAGTTAGAAGAAAGAACTTCTATAT  
AAGTTAAGCATATAATTTGATTTTAACTTACAAGAGAAGCTCAATTCATTTAGCTTATG  
AGAGAACTCAATTCATTTTATCTTCTTTCTTCTGTAATTAAGTGGTTATGAAGAAATT  
TATTCACCAGGACTTCAGTATCAAATTTATGTGAGACAGATCTTCTCCTAACATATTGC  
AGTGCTTGGGCTTCCATCCGAGTGTGCTGTTTGGTGTCTCTTATGATGCAAAAGGCCAAA  
GAGATATTGAACCTGCAATAGTACTTTTCATGCTCGGCGAG

>Glyma02g09550 | Gm02:7475050-7476049 REVERSE

TTAATAAATGAGGTGCTGGACCGTGCTAAAATTGAAGCTGGCAAGTTAGAGCTGGAGGCT  
GTTCCATTTGATCTTCGGTCCATAATTGATGATGCCTTTCTCTTTTTCTGAGAAATCT  
AGACACAAAGGTTTAGAGGTATGCTTCATTTTTTATTAACCTACTACAAATGCCATCGCA  
TTGTTTTGCTTCGTCCAAGTTTACCATTCTATTTTTTAAATTGATGAACTTATACTGTTT  
TTTCATCTCTTTTTCACCTTTTTGGTGTCTTATGCCACTCGATGTTTCATGTTCTGATGC  
TCATACTGAACCTCAACCTGAACTCATATTGTCAATTGTGGAAGTAAAGCTGGCTGTGT  
TGTTTTCTGACAAAGTTCCAGATATTGTCATGGGAGATCCTGGGAGATTACAGACAAATAAT  
AACAAATCTTGTTGGCAACTCTGTTAAAGTAAGTGGAAATTTTACATCTGTCAGATGTTA  
TTTGCATTTGGAATGCCATTCTAACTGTTTCAATCTTCTTATCTTCACTTTTAGATTTA  
GCCTTTGTTTTCTTCTTTCCCCACAGTGGGCAGTTGTGGAAGAAAAAATTGATATTGA  
TGCTTGATCCTTCATATTTATTCTTTCCCTTGATACGTTAAATTTATTCACAAGGTAC  
TTGTTGCCTTGTTGATAACACTACTAATTAATTTGCACATCTTGAAGTTTACTGAACAAG  
GGCATATATTTGTTAAAGTCCATCTAGCGGACAACCGAAAGTCCATGATGAATGGAAAAC  
ACGAGACTTTTCTAAATGGAGAATCAGATGAAGTTTTCTATATATCTGGTGATTATCATT  
TCAAACCTTAAGTGGATGTGAAGCAGCTGATGAACGGAACAGTTGGGATAATTTAAGC  
ATCTAATAGCTGACAAAGAATATGGCCTTGATTCTTCTAGAGAAACAATGGCTGCTGTG  
AATCTCCGAGCAAGTCACATTGAGGGTATGCGTGGAGGA

>Glyma02g05220 | Gm02:4231677-4232676 REVERSE

AAAGATTTTCATATGGGTTAAGCTTAAGCATGTAGTTTTGGTTTTCATTTTCGAGATCTATGT  
TTGTGGAAGCAAAAATATTATTGATAATGCTTGATTTTAGAGAAAATAATAGGTTTAATT  
ATTTATTTGGTTCTTATTTTATGTTTTGTCCCTATGTCAAGAAATTAGATGTTATACTCT  
CTATAAATACACTTTTAAATTTAATTCTATGTTGATCCTAATGTTAGGTGTATCTTAAC  
TTTATTAAGTAAACTAAAATAGAAAATAACAATGTATACCCACTACATTTTTTCTAAAT  
TTGCTAAACTGCCACAACTTAATAATAGAAAGTAAAATGATATTAAGACGTGCAGA  
GACTAAAATATTTAGTTTTAAGTATATGAACTAAACCATAAAAATGATGTAAACGTAAG  
TTTGAGTAATTAATCATTACACAATTAATCAAACCATAAAGTTTGTGTTTAAAGTTT  
TATAATAATTATTTAAAAGTCTTACATGACATAATTTATGAAGGTTAATAATATAAAAT  
TCCTTGATTGATAATACATAAAAAAAAATTTAATTTATTATTAGAAATTAATTTCTTG  
CTTGTCGGTGGGAGGAACTATGGTGGAAAAAATATATTTGAAAAGCTTTTCTCTGCCAG  
CCACACAAATATATTAATTTTGTATCTCTTTACAATCTCGCAAACAAGTGTTAAAAG  
GGTGACATGACTTCCACCTAAGTAGAGTCTAGGAAGGGTAGTAGATGTACGCAATCTTAG  
CCTAGATAGGTTTCGTGATTTAATAGGGGAAGTGTTATTATCCAATCAAATTCGTGAAA  
AGCTATTCCTCTCAAGCACACAAACAAAGTTTAATTGCTACTTTATATGCTCATGGCT  
GCTTCAAGTAACACAACAGTGAGTTATATGTGACAGAAGACAAAGACCAAAGTTCTTCTG  
AAAGTTCTGTATGGTCTCTCCAGGTTCAAGGTAGCCAATA

>Glyma02g47610 | Gm02:51135386-51136385 FORWARD

CCAAACTTTGTGCGCCCTGAGGGGTGGATTGCTGAGAAATTTTTGGGTTTGCTTCAATT  
TTGCTTTTGACAGTTGAAGATTCATGGTGGGTTGCTTGGTGGTTCAGCTTTTTGAATGTTT  
TGCTCAAGCTGCTGGGCTTGCCTTGAATCTCCAGGACTGTTACGTTGGTGAATTTGGCA  
AGGATGTCTGTGAATCGAAGGCTTCTGCTTCAAATGGTAGATTGCTATCAAATATGAAG  
TCTTGGAAGCTGAATGAGCCTCTGCATGGGTCTAATTGTCCCAGGGCATGCAGGAGGAAG  
CCCTTGCTTCTTTGGTTTTTTGGCTTTGTTGCCATAGGGACTGTTTGGTTTCATCTTGAGT  
TTCAATAGTAAGTATTTGATGAGCAAGGAGAATGAAGCAATTTGTGAAGAGAGAGAGAGA  
ATCTTGCTACAACGTTACAATGTTAGTAGGAAACAGATTTCATGCTTTGGCTTCTTGCTC  
TCTGGATCAGATCAGGTGAACTATACTTTCAATTTTATTGCTGCATATTGTGCTCGCTGA  
GGATAATTCATAATTATTTACTTTTGGCTTAGAACTTTAATTAATTTGGCTTCTTCTATG  
TACTAACTGTTCTTTCTATTGGGCGTTATTGTCACTAAACAACAACCTTCTTGTGGATT  
ATATATTTGAGCTGAAGTGAAGATGTAAAATATTGAGAACCAATAGATTGTCTTAAATG  
AAAGGGTATAAACCATGCTCTTCTGATGCTTTTTCCGCAAGGTTTCTTAGGATCACCTT  
ATTTTGTACAAAAGGTTGATTTCTAAAAGTATGGATACTCTTGTGCTAGATTTTTGATA  
GAAAACAGTGATTGTTGCAGAGATAAATATGAACAGTAACAAAGTCGTGCTCTTTGCTCCT  
ATGCTTACTAAGTTTATAATGCAGATTTTATCCAAGTATTGATGAAAGAAGACTTCA  
AATGCTGCTAGGCAGCGCATGGTTAGCACTCCACAGTTA

>Glyma14g01040 | Gm14:565485-566484 REVERSE

ATGAAAGAAGACTTCAAATGCTGTTAAGCAGCGGCATGGTCAGTACACCACAGTTAATAT  
GTCCGGAGAATCAGGAGTTACAAAAGGTGCATACATGTGTTGCAGACACTGTAGAACCTA

TAGAACAATGCCAGTTCTCAATGATTGTGTCCAGACAAGGCTTGAATTATCATTCCCAT  
TGAAAAGTTATGTATCATTGGCCTCGCACTCTGCACTTCCAACCTGATTGGTTAGTTATT  
TGCACCGTGGAAAGGTAGAATCTTTACTAAAGCTAAGGCATGTATTTGTTATGCCAAAA  
GTTTCATAATTTAAATTGTTGACTCTCCTAAAAAATAGGGATTACCCAAGAATTATAGCC  
TAGCTTACAATTCTCTTTTCTCACTGCTCAGCCTATCCTAGGGGGGCATAATATGGTTGT  
TGATTGAATGGAGATAAAAAAAGCATAGTGATGAACTTTAGGATTCTAAATATCATT  
TTCTGTAAGAGTGCTGAGTTTGTGGAAGCTGGGTGAGAAATGTAACCTATTAATAATGCAT  
CATCTGGATCTACAGTGTACCATTTTGTATGCACTTGAATGTAATCAAAAGATTCCCTTG  
AATTGCCTATCTGGCATCATAGCATTCTTTTATAGCTTGGCTAGTGCTATAATAAATTC  
TTGTCTTGATGTGTAAAAGACAGGGCATCACCGATGATAGTCTAGCTTTCAAATCATTCA  
ACCTACAGCCTAATAATAATAGTCATATCAAGGAAAAGTAGTGGATTTTGGTTTATTTGC  
TCCAAATATTGCCTTTCCCATGTTACTTGTGAATGTGATTATACCATAGACTCTGCTTC  
TAAGCTTGTGCAATAACTATGAAGGCGTGCAATCCTTGCATGCTTATTTGAAACAATAAC  
TTCCACTATATAATTAATTTGCTAATTCATTTTGGCTTTGCAGAACATTGTGCAATCATG  
GGAACCTAGGGTATCTGCAATTCGGTATCATGCGAGTTCA

>Glyma08g11060 | Gm08:8074555-8075554 FORWARD

CTATTAACATAAACAGTAGACAGATTCTAGGGGAAAAGAAGAAGGAAGGGAAAAAGATA  
ATAACACCTTGAGAGGTTCTAATCATTGCGTGGTGCCTATCTCTATACCTACTCTTTT  
GACTCTGGGTCTCTCCCATGGCAGTTTTGATAAAGTACGGGGGTATCAAATGCCATTCT  
GAGCCAAAAAGCTTATGCCTTATTCTTGAATTTTGGTTCCATGCAGGGGCACTTTTGT  
CAACACAAAAGTACAGCTAACACAAACCCACGCACGCACAGAGTAAACGACTTGGCGTG  
AAGAAGTTGTCTACTGGCATGGACGGATAGGGATGTGAACACAAAGCAAACCAAAGTTAA  
GAAAGGCTGTGATTTCTGCTCAGTGGAACTATGCCTTTTCTGCCCTCTATTTTTTTTTTT  
ATAAAATTTTTGGTACCCATAATACTGTGATCTGATTTATCAGTTTTGTTAAATGATTAA  
TTTCTGATTGAGAATCTGATTTGAGCCATAATTTATAATTTTATAGTAATTTTTTCATCTC  
AATCAAGACTTTAACTTAATATTTTATTTTATTTAAAGAGATTAATTTCATTACCCTCGT  
ACCAATGATTTGTTATTTTGTCTCAATTTTTTTATTATTACTTGTGTTCAAATAT  
GCAATATAACTTTATATATATATATATATATATATATATATATATATATATATATATA  
TATATATATATATATATATAACAAGCTTGTTAAAATATACTATAAGTGTATTATTGCTAT  
ATTCCTTTGACAAATATTGTTTTTTGAGTGGATAGTTTGGAAAGAGATAATGGACTATA  
ATAATGTTGAAAACAATTGTGCTATGCTACCGTATTATTCTTATCATCTTGCCTTGCCAA  
ATTCTCCTACTACCTGAGCTCGATGAACAACAACCTCATTGCTTAAAGTCCTTGCAGCT  
TCATTCTCCACGTTCAAGTTACCTTCTTTTTTTTTTTTTT

>Glyma06g06180 | Gm06:4435872-4436871 FORWARD

NNNNNNNNNNNNNNNNNNNNNNNNNNNNNNNNNNNNNNNNNNNNNNNNNNNNNNNNNNNN  
GAAAGTGATGTGTGGT

CAAACAAGAGGAGTGAGATGATGTTGAGTATGACACTGTC

>Glyma14g12330 | Gm14:11061398-11062397 REVERSE

ACTTCTTCAACAATTCATTGTCATGACATGATTCACAATCATGTATAAGGTTGGTTTGCA  
TTTATTGATTAGTTTTTAATTTGGGGGTGCCAATTAATCCTTATGCCTTTTCTTTA  
GAGTCTTATTATTTTTTCTTCTATTTGGGTGGTTGTTGTTGCTATTGCTGATGATGGA

TCTTGATTTTGTATTGCAATTGGGATCAATCATTCAATCTTCTTTGTATTTGTGAAAA  
TGTGTAGTAGTTTTGTTTTGCAATTTATAAGTGTGGATGAAGTTTATTTGTTTTGTG  
TGATTGAGCTCTTAAAAGTCTAAGGTGTGGTTTTCACTTCCTTTCTCGTTATTCTGAATG  
TGCAGTGTGAGTGCAGGTGCTATTCAACTTCTGTTTTCAACACTTTCCAATATATATATA  
TATATATATATATATATATATATATATATATATTTTTAAATAGTTTAATGCACCAATTCATGATT  
TCTTAATCAGTTAACTTCTATTCAAGTGTGATTTCTTCAGGGGTTGATATCACATATTT  
TCTTCAACCGTTGTCCTCAGGTCATGGTTTTGTCACATTCCATATTTCAATTCTTTAGCA  
TGACATAATGACATCAAATCAATGAACATTGTGTTTTCGTCTCTTTAACTTTTTCTTAT  
TCTTCTATTCTTGGTCGGTTAAAGTTAAGTTCTGATCTTGGTGGTTACTTTCACTGTAC  
TACTTTTGGTTTTGTACTTCTTTATTTCAATTCCACCTTTCTTAATGGTAACTTAAT  
TCTATTATATATCTGTTCCAATTTCTTACAAGAGACTCATCTTGGCCTAACAGATTG  
CAGCTGGCACTAGTGTCTGGCTTATAGATAAAGACAATAATTAATACATTGACCAGTG  
CTTCTTGTGATGCAAGTACTATGGATTGAAGGAAGAGCTAGTTGAAACCACAAGTTGAAT  
ATTGTGGAAAAGAAATTTGGATGCTATCAGTTTGCTTTCA

>Glyma05g34310 | Gm05:38686419-38687418 FORWARD

GTAATAAAGGGCATAAAAAAATAAACAAGTACATAGTCTGTGTGTGTGAGAGAGAGA  
GAGGGCACACACAGATCAAGACCAACAACTGGTTCCAATAGCCACCTTCGT  
CTCTTTCATGTACAGACAGGTAACATGTTTTCTCTCTCTCTCTCTCTCAAGAGT  
CTCAACAACCCCTTTTTCCATCTCTATCTCTTTCTCATTGGGTTGTGTGCTTCGCTGTG  
TGTGTATGGTTTTTTGGGGTCAATCTCTGGCTTTGATTATTATATGGAGGAAAGAGGGT  
GAACGTGCTCTTCTTTGTCCTTAAGCAAGCACTAGTTTACGCCTACTCAGCATGATTAT  
TGATTAGAGTTCTCTTCCATTTTTTTATTCTGATCCTTAAGTCCAAAACCTCTGTTGAAA  
CACACAAATATTGGCTGTTGGGGAAGGGGAAGGTGGTTCTTTGGAATTTGAGCTTCTTTT  
TTTTTTTTTATACATCTTTTGAGACTCATGCTTGTCTCTCAATTATTCTTCTTTTAAA  
TCCTGGGTCTTTTGGTTGAATTTTTTCCATTTCTTTTCTTTTTCTTTTTGGGTGGTG  
ATTTTTTGAATAGGCTTAGCTTCTTTCTTAATAAGAGATAAAATAAAGAAAAGAATTT  
GTCCAACCTGGTCAATCATTATTGTGCTAGTTTGCTTTTGGTTCTTCTTTCTGAGTTTTG  
AATCGCGCAAACAATGCTGCAATGATGCCGTACATGGAGTTTTGTTTCTGTGACCTTTT  
TCTTCCAACCATCAGAGAAAAGTGTCTGTGTTTTGCTAGTACTACTTTTCAGCTTTAAGC  
ATAGTGAGGTCCTCTACATAAACTCTAACCACAATTACTTTTGGGGCTTCTTTTCCGAC  
TTTTATAGATGATGAATAGGGCAGAAAGATAGGGAGGGGCAGAGAGAAATTGTTGGTGAT  
GGGTCTTGGTTGAAGATGAAGAGCCTGAGGCACCACCCC

>Glyma04g06190 | Gm04:4738919-4739918 FORWARD

GCACCCCTATTGCACATACCTATCTGGAATTCCTTTTTATCAATTTTCTTATTAAGT  
TTGTTCTTTGTACCTCACATATTTATAAACTCATGCTGTCTCTCCATATGCTAATTAC  
TCCTCTATCCTCTAGTGATCAGCTACTTTTCTTGTGATGCATTTGAATCCTCAGTGGA  
AGAGATTCTTCTCAGAGTTTGATTCTCCCATTTAATTTCTGAGGTGGGCTGCAATGACC  
CTTCTTTTCTTTTTGGATAACAATGATGCAATGATCTTTTAACTTAGAGTTAGTTATT  
TTTATCCCTTTTATCAATTTACTTTTCTGCTGGACACTGAGTTCTGTTATTCTAT  
GTGTATTCCAATGCAGTTTGTCTGGA AAAACCATAAGTTCTTTAAGAGAAGAAAATAAC  
AAGGTA AAATGAATTGAATTTTTATAAATTA AAATTAATCTATGCATTCCATTTTTTTG  
AAGAAGTTAGATGAAAGAACTTTTATAGGTTAAGCATATAAGTTGATTTAACTTACG  
AGATAAACTTAATTTATTGTAGCTTATGAGAGAAATTCAATTCATTTAGGATAATTTGTT  
TAAGCTTATTTGTTAAAATAAATGTTTATTTAATGATATAAGCGCTTAAAAACAAC  
TTCTGTTTTTCAATGTGTTTGTCTAAATTGCTTATGCTTAAAAAATAATTTGAGTTAT  
TTTAAGAAATAAATCTTCAATCTTCTTTAAAAAACTCTTCTTTAAAGTTATTTTTTT  
AAAAGCTTAAGCAAACCTCACTTTATCTTCTATCTTCTGTAAGTGCACATGGAGAAATTTA  
TTCAACCAGCACTTTAGTACCTAACTTATGTGAGACTGATCTTCTCCTAACATATTGCAG  
TGCTTTGGCTTCCATCCGAATGTGCTGTTTGCAGGCTTTATGATGCAAAAAGGTCATAGT  
GATATATTAACCTGGACTAGTACTTTTCTATGCTCCTCGAG

>Glyma09g00490 | Gm09:218447-219446 FORWARD

GAGCGAGTATGGTATTATTGCCATGTATCCTAAGCCTCAAGAAATTCTTACATTTGGTAA  
AGCCAAGGAGATTGAAAGTTTTTGGCAGGTATAATACATGCAGTTATATGGTGTATTG  
GTTGGTGAAGGAATGATTGCATCTTTATGCTTCAAGAAATTGTTTTGAATAAGATTGTCTT  
CTAGCCTCTATCTGGTTCTCCTGTGGTTCTTTTGGAGGAGTTTTTCAATTTATCATACGGAG  
AGAGACTGGAGAGCTGGACAGCTTTGTTGAATTTTTAATTTGTTTTGGAGGATATTTTAT

CCTCCCCTTGTTTCAGTTTGTCTTCTCTCATAAAAATATCATTCTTCTATTTTAAAAAAAAG  
ACTTGAAAAGTTTTATATCGTATAACCGGTAGTACTCTGTCATGAATAAACTATCGTAAA  
AGCTTAAGCTATTGGGTGAAC TTGAATGATTTTATATTGCATCTCTGAAATGCCCCCTCA  
CACAATAGCCCTTTGGGATTAATGTGGATAATGCACACGCCCATCTATCTTGGCCTGA  
AATTTATCTTTCCATTAGAATAATTGGGGCAACATTGATCGAATTTTAGATCGATCACTT  
GACCGTGCAGGCTTGGATACCATGTTAGGAACCAACTATCCCAAATGCTTAAGATGTTA  
GGTTAAGACATGAATGGTTTGTACTACATCTCTAACTTACTGTCTCATTTTGTCTGCCTT  
TGTTTAATTAGGTCAGTTCAACATTATAGTTTATGATTTTATAGTACATAACTATCTTAT  
TTTAATTCGATTTTCTCTTTTATCTGTGGTTAGAAACACATGCCAGGGGGAATTGAATG  
ACAGAATGTTCTGACATTAATATTCATTTGATAGCTGTTTTTCATTCGAATATTATTGTTG  
TTTTCATCTGTTCCATTCCCATCTATCTGATGCTTAACTTTTCCATCTTTTAAATGTAGTT  
ATGTGAAAAAGGAAAAATCGCCTGAGGTGGTTCAAACACT

>Glyma11g08310 | Gm11:5889650-5890649 FORWARD

GTGATCTTCACTACAATTGATAGTTTGTCTTAACTGATGACATAGGTAATAAAAAAAAAAAAA  
TCTTGTAAATAGAAAATGTCACCAGTGAAAGATGGTATAAAAAGTATGGCCTGATAATTTCA  
GAAATAAAACGAGCTTATTATGTCTTTTCTTTTGTCTCCAACAATCCCTCTTTTAGTT  
GTCTATTTCTTAAAATTAGTATTTCTTTTACAATCTAGGAAATTAATAATAAGCTAAT  
ATATTTTATTAATAAATAATTAATCAGCAGTTGAGATTTAAAATTGATCATTCAAAAAA  
TACTATGAAATAAGAGGAATGAGAGATAATAACAATTATTTTACATCTTCAAAGTAAG  
TAAAAAAACTCAATAAAGGAATAAGAATTAATAAATAATGATAATATAATTAAGATA  
AAAGATAAAAAAAACTAAGAACCGATGGTTAATGCACATAATATGATTATTTTTTTCC  
AATTTATTTCACTCAAAGTTCAATTAATTTAACTTTAAACCACACAAATTAGTCT  
AACTTATGTCAAATTTGTTATTGTTATAAATTTTACTCTTTAGGGGAAGTTTTATAGCT  
TAGCATTATCAGTATCAGTCTTTTGTCTTTTCTTTAGTACAGTATAATATTGGAATGCGA  
TAAAAGATCTTCTCAATGTATGTCTAATATGAATGCATTATAAAGATAAAAGGATGCATT  
TATTTTTGGTACAGAAAATAATGCATTTTGTAAATAACAATATGTTATGATATTATTA  
TAAATCATCAATGTATTGATACGCACACACTCACTATATATTGAAAACCTAACACACATA  
CAGAGAGGCTTCTCTGTTTACACACAGGCCAAGCATAAACAAGTTGGAATCTCTCAGAT  
GAGTTGCTTTATAACCTCATACTCATAGATTCTGCAGTGAGTTATGGCAGAAAACAAAGA  
CGAATCTATTCTGAATGTTACCAGGCTCAAACCTCTCA

>Glyma08g05370 | Gm08:3808914-3809913 REVERSE

ATCGTGAAAATTCTATTTAGTTTCTGATGTGCTTAAATTAAGCAAAGAAAAAAGCAA  
GCAACCACACGTATAGTAATAAAGGGTATAAAGAAACAACAAGTACATAGTGAGAGAGA  
GAGAGAGAGAGAGAGAGAGAGGGCACACACACAGATCAAGTCCAACAACCAAACCTG  
GTTCCAATTGTTCAATTGTACAGCCACCTTCTTCTTTTCTGTACAGACAGGTAACATGGT  
TTTTTCTCTCTCTCAAGAGTCTCAAGAACCCCCCTTTTCCATCTCAATCTCTTTCT  
TATTGGGTTGTGTGCTTCGCTGTGTGTATGGTTTTTGGGGTCAATCTCTGGCTTTG  
ATTATTATGGAGGAAC TTGCTCTTCTTTGCTTAAAGCAAACACTAGTTTCAACGCCTA  
CTCAGCATGATTATTCATTAGAGTTCTCTTTTCTTTTATTCTCATCTTAACTACC  
AAAACCTCTGTTAAACACACAAATATTGCTGTTGGGAAGGAGAAGGTGGTTCTTTGGAA  
TTTGAGCTCCTTTTTTTTTTTTACATCTTTTGTGACTCATGCTTGTCTCTCAATTATTAT  
TCTTCTTTTAAATTCTGGATCTTTTAGCTTTGAGATTTTTTCTTTTTTGAATAGGCTTA  
GCTTCTTTCTTTAATAAGATAAAATAAAGAAAAAGAATTTGCCCAACTGGTCAATCGTTC  
ATTGTTCTACTAGTTTGGTTTTGGTTCTTCTTTCTGAGTTTTGAATCGCGCAAATCAATG  
CTGCAATGATGCCGTACATGGAGTTTTGTTCTGTGACCTTGGAGAGAAAAGTGTCTGTGT  
TTTGCTAGTACTAGTTTCAACTTTAAGCAAATTGAGGTTCTCCTATAAAAGCAATAACCA  
GAATTATTTTTATTTTTGGGGTTTCTTCCGACTTTTATAGATAATGAATGAATCGGACA  
GAGAGAAAAGAAATTGTTGGTGTATGGGTCTTGGTTTGAAG

>Glyma07g27540 | Gm07:30902949-30903948 REVERSE

GGTGTCTTATGCCACTCGATTTTCATGTTCTGATGCTCATACTGAACCTCAACCTGAAC  
TCATATTGTCAATTGTGGAAGTAAAGCTGGCTGTGTTTGTCTGACAAAGTTCCGGATA  
TTGTCATGGGAGATCCTGGGAGATTCAGACAAATAATAACAATCTTGTGGCAACTCTG  
TTAAAGTAAGTGAATTTTTCATAGTTTGTTCATCTGTTGGATGTTATTGCAATTTGAAA  
TGCCATTCTAAGTTTCTAACTGTTTCAATCTTCTTCACTTTTCTTCTCCCCCCCCCCCC  
CCACAGTGAGCAGCTGTGGAAGAAAGCATTGATATTGATGCTTGAATCCTTCATATTTAT  
TCTCTCCCTTGTGTACGCCAAATTTTATTCACAAGGTAAGTGTGATAACACTTAAT

AATTTGCACATCTTGCAGTTTACTGAACAAGGGCATATATTTGTTAAAGTTCATCTAGCA  
GACAATCGAAAGTCCATAATGAATGGAAAACACGATACTTTTCTAAATGGAGAATCAGAT  
GAAGTTTTCCATATATCTGGTGATTATCATTTCAAAACCTTAAGTGGATGTGAAGCTGCC  
GATGAACGGAATAGTTGGGATAATTTAAGCATCTAATCGCTGACGAAGAATATGGCCTT  
GATTCTTCTAGAGAAACAATGGCTGCTTGTGAATCTTCTGAGCAAGTCACCTTGAGGGTG  
TGCCTGGAGGACACTGGAATTGGAATTCCTTCTCAGCTCAGGATGGGATATTCATGCCA  
TTTGTGCAGGCTGACAGCTCAACCTCACGAAATTATGGGGTACTGGTATTGGCTTGAGT  
ATCAGTAAATGTCTGGTTGAGCTAATGGGTGGTCAGATAAACTTCATAAGTCGACCCAG  
GTTGGGAGCACCTTTTCTTTACTGCAGTTTGTGAAGCATTTAAGAAAAGTTCAGTTACC  
AACAGAAGAAAAATTTGGAAGATCTGCCTCAAGTTTTA

>Glyma19g40090 | Gm19:46552180-46553179 REVERSE

ATTTGTTCTCTGTTTACTGGATAAAATTTTAAATGAGAGACTTTATTGGAATAATTTA  
AAAGAATGTGAGAAATAATAGTATAACAAATTAATTAAGATAACTAAAATCACAAATA  
AATTTACATACAAACACTAAAAGTGTAAATAAACATAGAGAGAGTCAGAAGTATTGAAC  
CAAGTTCGGCACATGAGTGAAGAAATTAATAAAATATATAAAATGTACAAAATATATA  
TATAATTTAAAATGTATTTTTAGATGATTTTTAATAAAAAAAAAAATTTTTTAATTTCTA  
AATCAGTATTTTAGTTAAGAAGATGAAGATCCATGATGAAAACCCGTTAGATGATATTGG  
GCAGCAGGCGTCGGATTGGATAAAGAAAGAAGGCCAAATGGGAATTTGGACCGGATACGC  
TGGATTTACACCCATCTGTCAACACTCGAAGGAAAAGTTAACACACATTCATATAGTGTG  
GTCCAAATCAAGAAACTTCACAATGCCCATGGCCTAGAAAAGTTGATTGATCACACAAA  
CACCAATCAGAATTCAGAATTCAGAATTCAGAATTCAGAATTCAGACTCGCGGTTTACTAATATTCTTT  
TGAAATTTATTTATACGTACCCAGAAAAGTGAAGCTGAGTAGGCCAGGCCACCGTCC  
AATGAATTCCTTTCCAGCCTCTAACAGAAAATTTGGCAAATATTACCAAAAATG  
AGAAAATAAAATAAAAAGGTGCCAGCCAATCCGAAAATGATGTGGCACGTGTGTAAGCG  
AAAAGTAAAATGAGAGAAGCATGGAAAAAAGGGCACGCCGAGTGGGAGTAGGCGTTTG  
CCATGCTTGCCGTGAGGGATGGGCTAACGTTAATCTCATGTCATGCTTTTTAACCCACT  
CACACACTCTCTCTTTCTTTCATGCCCGCCTCCCTTTCTTCTTCTTGGTAACATCC  
TCTTCTCTATAAACACTCTTTATTCTCTCTATTTACTTCC

>Glyma03g37470 | Gm03:44081715-44082714 REVERSE

TAGATTTTACTTAAATAAATCAAAAGTATTTTTATTCTTAAAATGACAGTTTTTATTTA  
TTTTTATTTTGTGCATTAATTTGTAATTACATATTAGAATTCAGAAATATTTTTT  
TTCAGATTCGGAAGAATACTTCCAAACATTACTTCATACATAATGTACTTATTTGTAA  
TTTCTTTAAGAGTTTAAATTAATAATGTAAAATTTTATATTATCATTTAATTATAAAT  
CATCATTTAATTTTAAAATAATTATTTTAAAATTTTAAATAATGTATCATACGTAA  
TATGTTATGACTGAACGATTATGTTAAATTTTCTATATTATTAATGTATATTTTTCTTA  
AGTCTTTTTCAAGATATTTTTATGACATATTCAAGATATATACTTTTTATTTGAAACAC  
AAGTATCTCTTTCATCATAATTTTATTCAAGATGAATATAATTATTATAAATAACAAAAG  
TTTATATTCAAATAATTAACATAATTTGAATATGAAATCAGTGAATAAACACCAATTAAT  
TCTTAATCGAAACATGTGGTTTGATAAACAAACAAGGCAATTGGAAATTTGGACCGGATG  
CACGGGATTTGACACCCATTAGGAAAAGTTAACACACATCGATATAGTGGTCCAAATTC  
AAGAACTTCACAATGCCACGGCCAAGAAAGTTGAATTACGAACACCAAGCAGAATTAA  
GGACTTCAAATATATTTTTTTGAAAGGGTGAATCGAATCTGAAATTTATTTTACACGTAG  
CCAGAAAAGTGAAGCTGAGTAGGCCAGGCCACCGTCCAATGAATCCCATTTCCTAAC  
ATAAAAAACCACAGCCACATTAGCTTCTAGGCAAAAATGAGAAAATATAAAATAAAAAA  
GGTCCCAGCCAATCCGAAAATGATGTGGCACGTGTGTAATGAGAGAAGCATGGAAAAA  
AGGGAACGCCGAGTCAGAGTAGGCGTTTGCCATGCTTGT

>Glyma05g28070 | Gm05:33959056-33960055 FORWARD

TTATTTTATATAGAATAACATTATCGTAGTTGGAGATTCCCTGCCTATTTTCATTCAA  
CTATTACATATCTCAGGTTTTAGTTTTAATTTGACAATAATAGAAACCTTATTTTTAA  
TTATTTCTTTGGATCTGAATACACGTTAAAGCCATTTTTGGGGGCATAATAAATACCT  
TACATATGCAATGCTAAAAAAGTTAAAACACTAGGACACTACAATATTAGGAAAGGGGAGAA  
AAAAAGAAAAGAGAGAACAAGTTCTAATGGGTAAAGTGACAAATGACCTAAGTTCTCTCA  
CAATGTTCCATTCTTGTGTTGGATCAATAAATATTGGCAGAGGAGAGTGGTAAACAGT  
GATGTCCTCAGAGTATAGTGTCTGAATTCAGCGTAAAGTTAACTAATAAACTATAAAC  
TAAACAGTAGACAGATTTCGAGGGGAAAGAAGAAGAAGATAAATAACACCTCGAGAGGT  
TCTAATCATGCGTGGTGCCTCTATCTATATACCTACGTCTTTTACTCTGGGTCCTC



CCTCCCATGGCAATTTTGATAAAGTACTACGGGGTATCAAATGCCATTGTGAGCAAAGA  
AGCTTACGCCTTATTCTTGAAATTTGGTTCCATGCAGGGGCACTTTTGCCAACACAAAA  
GTACAGCTAAACAAACACACGCACGCACAGAGCTAACGACTTAGCGTGAAGAAGTTGTCT  
ACTGGCATGGACGGATAGGGATGTGAACACAAAGCAGACCAAAGTTAAAAAAGGCTGT  
GATTTCTGCTCAGTGAAGTATGCCTTTCTCCCTCTATTTTATTATTATTGTTATTACAC  
TTGTGTTCAAATATAACAATAAATTTATTTTTATAATAAGCTTGTTAAAATATATA  
ATGTTTATTGCTATATTCTTTTGACAAGTATTGTTTTTTGAGTGGATAGTTTGGAAAGAG  
ATAATGGCCTATAATAATATTTTGAAAACATTTGTGCTGT

>Glyma12g37050 | Gm12:40025318-40026317 REVERSE

GTTTCCTCTTTGGGACTAATTCTGTCTATAAACCAGTGGCTGTCATTA AAAAAGAATAAG  
AGAAATTAATTTTCCCTTTGCTATTCTTATAGTCATAAATAAGGAAAACAAAGCTTAAC  
AAGTGGTTATCTAGAAGCTCTGAGTGAGTATCGGTGTTATGTCTTAGGCTGCATTTTAAA  
CTAAAAATCCCAACAGTAGCCTAGAGTTGTATTAATTAATAATATATTTGTTTTCAATTTCT  
CATATCTTTCTCTATGTTAAAATGATCTAGAGTTATATTATTCATCATGAATTTGGGCTT  
ATTTTATTGATCATAAATCTTGTGATTCATGATACGATTGATACATAGGCTTTCCGATA  
CATATTTTGTGTTCCAATTCAACTACCATGATCCTAAGCCTCAAGAAATTTTCAATTTG  
GTAAAGCCAAGGAGGTTGAAAGTTTTTCAGCAGTGTGAAATATATGCAGTTATATGGTGTA  
TTCAGTTGGTGAGGAATGATTGCATCTTTATGTTTCAGAACTTGTTTTGGAATGAGATTG  
TCTTCTAGCCTCTATCTTGTCTCCTGTGGTTCTTTTGAGGGAGTTTTTCATTTATCATAT  
GGAGAGAGGCTGGAGAGCTGGACAGCTTTGCTGAATTTTTAATTTGTTTTGGAGGATATT  
TTATCCTCCCCTTGTTTCAGTTTGTCTTCTCTCATAAAATATCATTTTCTGTTTTAAGAA  
GACTTGAAACTTTTAATGTAGTATAACCAGTAGTACTCTGTCATGAATCAACTATCCTAA  
AAGCTTATACTATTAAGTGAAGTGAATGGTTTTATATTGCATCTCTGAAAGGCCCTCA  
CACAAGAGCCCTTTGGGATTA AA ACTTGATTATGCACA ACTTTTCCATCTAGTTTGTG  
TTTTCGTCTGTTCCATTCCCTTCTATCTGATGCTTGACTTTTCCATCTTTTGATGTAGTT  
ATGTGAAAAAGGAAAAATTGCCTGAGGTGGTTCAATCACT

>Glyma01g36950 | Gm01:49347823-49348822 REVERSE

AGGGAAGATGGGTGGCAAATGTGGCATCTGATGAAAGCCATAAGCGTCATGGATAAGGA  
ATAAAATCAGCCCTTTTCTACTGCACTGCCACACAAAAGAGCCTCATGACACAACAAT  
GAAATTTAAAAAGTATAAGGTTGATTTGTCCTTCATTAATTATATTTTTTTATTCGTA  
TCAAATTATATTTATAATAATTCACGCATTTTATTCAATTGACTAAATTAATTTCTTCT  
CATTAGTTAATGGTACTTACATTAACCTTGCCCTTCTTATATAGTGTCTTGTAAATTGTAT  
TAGATTTTCTAATAAGTGAATCGACATACTTGGTCAATCTTAATTAGTCCCATAAAAT  
CCAACCTTGTTCTACAATGTTATTATAAAAGAAA ACTTACAAGCTACTTGATTTAGTTA  
AAATTTTGTATAAATTAACCTGATAAATATAAAGTAATATAAAAAGACATATTTAATTA  
TGAGGTAAAAGAGATTTTCATCATTTCAAATAAATTAATATGAACAAAAATAAAGCAAAA  
AAAAACATATAAACTAGAAGCTGAAA ACTTGTATCATAAATAAATTTTATCTCTTTAGGC  
GAAGTTTTACTAGCACTTATCAGTATCAGTCTTCGCTTTTCTTTAGTACAGTATAATATT  
GGAATGCGATAAAAGATGTTCTCAATGATGTCTAATATGAATGCATTATGAATATAAAA  
GAATGCATTTTTGGGGGTACAGAAAAGATGCATTTTGTAAATAAACAATATGTTATGA  
TATTATAATAAATCATCAATGATTGATACGCACACACTCACTATATATTGAAA ACTT  
ACACACAGAGAGGCTTCTCTGTCTGACACGCAGGCCAAGCCTAAACATAAACAAGTTGGA  
ATCTCTCCGATGTGTTACTTTATAAGCTCATAGCTTCTGCAGTGA CTTATGGCAGAAAAC  
AAAGATGAAATCTATTCTGAAAGTTCTGAATGTTCAACAG

>Glyma10g29890 | Gm10:38642189-38643188 FORWARD

AATAATATTGCCCCATACTTGACCTACTCTTCATTTCGATTCTTTGTTTGTGTTTTTTTT  
TTAAAAAGAAATTTAAAAACTAAATATGTTTAAAAACATGTAATGATTATATAATTTTTAA  
AAATCATTATAACTTTTTAATTAGCAATTTCTTGAAAAATCATATCAAAGAACTACTTT  
TTTTAACTCAATCGAATATTTTTATAAAA ACTTGGTATGTGAGCGGAATAGAGTAAAA  
ATGTTGTTCTGTTCTTTTGGTATCATCCTTCTAGTAAAATTA ACTCTACTACCTTATGG  
TTTTTATATCATGTTATTTTTCTTTTCAAATATACCAAACATAAAATAAATTAATTAATGT  
TGTGTTTCGTTCCGTTTTAACAAGTTTATTA AA ACTTTACCTCTTTGGATATAATGATCAGG  
AAGTTGGTGAGGTTCACTTTATTGCTTCTGCAGTTCAAAAAATAGCAAGTTAAGCTTAGT  
TTTAGCAAGAATTTTACAGGGAAGTGTGAAGTGAGGGGCTTAGGATCTTGACTTTGAAAA

GAAAAATAATACCTTTACCCCATATAGGCAAGTCACCACCTAGGGTTGAGGGGTGGAAT  
TTAAAATGATAAGCAAGGTTTTTAAGAAAATAATGCAAAGCAAGAAGAGATAAAGATGGA  
GGTAATATCTACTAATCTACTAAGAAAAAAGGGAGGCAATAATTACCAAATGAAAAAGAT  
GGAAACATGAATGGTACGTGGCGTGAGTTTTAGATTAGATCTATTGGTCCTATTAGTTA  
AACTATTAGAGGTAAGGTTGGCCAGAAATGATAGTTGATGGGGAAGCAATGAACAGAAA  
CACATAAGTGACTGACTTTGAAAAGTGTTCATATGATTAAGAAATATATGTGTATA  
TATATATATATATATATATATATATATATATATATATATATATATATATATATTAT  
AAAACATAAATGATAGTTGTCTCAAGTATAAAATAAAAAC

>Glyma08g21510 | Gm08:16334343-16335342 REVERSE

GGAAAGAGGAATGTTTGCACAAATTTATGTGACGTTTTCTTTCTAACAATTTATGTGACC  
GATTAATAATTTATTGAAAATAATCAATTTTATGATGGATCTTAATTTTGAATTAGAAAAGAA  
TATCATTAAATGAGAATAACATATTAATTTGATGATTTTCAATAAATTTCAATGAATT  
ATAAAAAATATTAGAAAAATACTATAAGAAAGAGTATCACTAGAATTACATTATAAGAAA  
AAAGTTACATACAAATCAAGTATGTTACTTAACACCTAATCAGATAAAAAATAAGTATT  
ATAAGATTTATGAAGTAATAAAAAAGAGAGAGGAAAAAGAAATGAGAAATTTTATAGAATA  
TTTAAAAATGAAGTATTTTTCTATCATTATTCATATTTTAATTGTTTTGCCTGTCTG  
TGTTACTATACAAAAATAACTAAGTTTACTTTATATATTAAGAGAGTTTTAATCTCT  
TGAAGTCCACATAACTTGACCAACATGGCCTTAAATACAGTAGACATAGAAACCACAAAA  
TAAGTATAAGAATTTGATAAAGTGGGATTTTTTACCTATAATTACAACTTGGTTTCA  
ATAAAGCGCAAGTACGTAATCCATCAATTTCTGTATATCCATCCATGTGAAGTGTGAAGA  
AAATATGATCTTAGCGGTGAGATATAATAACATTCAAATGTGCAAATACCATTCAAGA  
TACTCCCCCCTAATTGCTTATGAAGTGCCCTTTCTTGACACGATTTCACTCTCACAA  
GTGCATGCAAATGCAACTTTGCAATTTGCAACCAGCTAGCCCCACCCCTCAATGATGAAA  
AAGAAAAGACGAAGCTTTTTGTCTTGTGCTTCTCACTTCTTAGATCCTAGACACCTGACA  
TCTTTTTTCTTGTCTATAAAACCCTTCTCTCCCCACCTTCATATCATGCATTCTCACC  
CCTTCAATCACCATAAACAACCTTTCTCTGCCTAATTCTCT

>Glyma07g03390 | Gm07:2378590-2379589 FORWARD

TCTGCGAATCGAAACGAGTCGATCCCAAAGTCGTGATTCTTCTCGAAATAGATGCCCTGG  
CAATGCAGCAACTCAACATAGTCATGGGTGTGGGCGTCACGTGCGACGTCGAAATCTCTG  
AAGTTGAATTCCAGATGAAGGCGTTGGAGGTGCCGAGGGTGGGAAGATTTCCCGCATTG  
TCGGAAGGGTGAGGCTGATTTGGATCAGGTGGAGGCGATCACGTTGGCTTTGAGCACGA  
CATAGTGTGCGGCGGGTTGACAATGGCGGAAGGAGGGGTCGCAAGCGTAGGAGCGTACA  
TTTGGAGACCTCTCAATCCGGTTGCCATTATCAAATCCGGTCAATTTAATTTTTATTAT  
TAAATCAGACGGACATAAATGGTTACTACCTTTTTCATAACTTACTTAGGGTGCAGAAAG  
AAATTTGACTTACGCACCCTAGTCTTTGTCAAAAAATTATGTTATTTACTTGAAAACCTTA  
AAGATTTTTCTTTCTTTGACAATTTAATAAAAACCATTAAAATAAAACAATTTTTT  
GTAGACTCAAATTAATAGGGCGTTTGTGTTGAAAGCATACAAGTCTAAGATTTAA  
AACATTACTATTAAGTAATTTATTTAAGCTATGAGAAAAATATTAATTTATAAGTTTT  
TTTTGTTTTAAATTTAATAAGAATATTAAGTCAAAGTGAAGTTTTATTTAATCAATTTG  
ATTATATTTAATTTAAGCTTAGGAGTAAGATGCAATAATAGGAGGATGAACAAGAATA  
ATTAATGTGGTCTCCAAGGCTTTAATAGTGGTACATATACAATATAAGAGGAAGGAAG  
TGAACACAAAACCTGTAACCTATAACCCCAAGGAAAAGAAGAAACAAGTTGAAGTG  
AGAAGAGGGTGCTCCATTTAGGGCCACTCTCGAACACTTTGATCATCAAATCAATTTAAG  
TGAATTGGTTGAGTCAGCCAAAACGGGTCTCCCTTTGTGG

>Glyma07g38310 | Gm07:43090238-43091237 REVERSE

TCCCGCAATAACAGAGAATATCAGAAAATTAAGGACACCAAGACCCTTCCAAAAGATAAG  
TTCCACCCTGAATATAAATCCCATATATACACATACATGGACCCTCGCTGCCTCCCACAC  
TCCAATATAATGATGATATTTTGTCTCTATTTTTTTTCAAGCCGAATGAAATGGTAAAAC  
TAATGTAACATGCAGTAAAAAAAATCAAATAGGATTGTCATACCAAAGTTTTGCA  
ACATGATCCCACGTTTGGATTATGATTTTTATGTGGGTATTGTCCTTCAAACCTAAT  
TAGAGTTACATTACCAAGAGGCACTTTCAAGATGCTGTATTAACGGATTTACATCTTTT  
ATGTTAAATATATAGATTTTTTTTTGGTATTGTTTTCATGTTATATTTAATACGATAA  
TATTGCATTATAATAAATTTGATAATTTAATTTTTATGAGTATTTGAATATGATGAAATA  
ATCAATAAAAGATTAATCTAATGACTAAAGATTAAGCTCGTGTCTTAAAAAACATGAGT  
TTGAATTCCTATGTCTAAATGAAGACCTTATTAGTTCTTAAAGTATTTAATAAGGTTCT  
CTGAGTCTTAAATTTGTCTTTGGTGAATTTCAAGAAATCTAATTCACCATTTTTTAACC

AAAAGAAAATATGATCAAATCAGAACATACAATGACAAATCATGGATAAAAATGATATAT  
AAAGATAAACAGTGGTGGGGTCAGTGATTCTGTAAGAAAGCAAAGAATAGATAGGAATAA  
AACTAAGACTCTACGGGGCCGGGCAGAAAGAGATAGTAGACGTGCACCAACAGCAACTA  
GACCTTGGATTTTGCACCTCTATTTCTCATCAATCTCTTTCACGTTCTAACGTGCATTATT  
TATTTATTTATACCTCCCTTTTGATTGAGCAATAGCATTAAAGTATCGTGTAACATAACAA  
AAAAGTAGTGGCTTGTGTTGTGTGACTGAGGGCCAAAGGC

>Glyma20g37450 | Gm20:45340317-45341316 REVERSE

TAATTGACCTACTTTTCATTTCGATTCTTTGTTTGAGTTTTTTTTTTAAGAATTCAAAA  
CTATTTATGCTTTAAAACGTGTAATGATTATATAATTTTTTAAAAAATCATTATAATTTT  
TGTAATTAGCAATTTCTTGTA AAAATCATAACAATAACTACTTTTTTAATTAACCTTGAT  
CAAATATTTTTATAAGAACTTGGTATGTAACCGGAATAGAGTAAAAAATCTTGCTCTATT  
TTGTTCTTTTGGTATTATCCTTCTAGTAAAAATTAACAGTACTACTTTGTGGTTTTTAT  
ATCATGTTATTTTTCTTTTAAAATCTACCAAACATAAAAAAAAAAATTAATGTTGTGT  
TCCGTCCGTTTTAACAAAGCTTATTAACCTTACCTCTTTGGATATAATGATCAGGAAGTT  
AGGTGAGGTTCACTTTATTGCTTCTGCAGTTGGAAACATAGCAAGTTAAGCTTAGTTTTA  
GCAAGAATTTACAGGCAAGTGTGAAGTGAGAGGCTTATGGTCTTGACTTTGGAAAAGAAA  
ATAACACCTTTACCCAATATAGGCAAGTCACCACCTAGGGTTGAGGAGTGAATTTAAA  
ATGATAAGCTAGGCTTTTAAAGAAAATAATAATGCAAAACAAGAAGAGATAAAGATGGAGG  
TAATATCTACCAATCTACTAAAAAAGGGAGGCAATAATTACCAAATGAAAAAGATGGA  
AACATGAATGGTACGTGGCGTGAGTTTTAGATTAGATTATGGTTCCTATTAATTTAACT  
ATTAGAGGTAAGGTGGCCACAAATGATAGGTTGATGGGGAAGCAATGAACAGAAGCAC  
AATAAGTGACTGACTTTGAAAAGTGTTCCTTATTATAAATATATATATATATATATAT  
ATATATATATATATATATATTATAAAATATAAATGATAGTTGTCTCAAGTATAGAATA  
AAAACCACACTATAAACTAGGCAGAAGAAGAAATGAGT

>Glyma02g16980 | Gm02:15323104-15324103 FORWARD

TCATCCAAAGATAAAGGCTATATAAGTGCCAAAAGTGGTAAATTTAATTTTCTATTTAAC  
AGGGGAATTGAAGTATTTTATGGGTCATTATAATAATGATATGAATTATTCTTTAAATT  
TAGTGATGACTAATTTTTGTGCAAAAATTTAATTGATTATTTTTATTGAATTTTTTTTT  
CAATCATGTTTTTTTTTTCATCCACCATCGAGATCTTATTTTAAATAAATATTACTTGGA  
TTAACTTAATGGTAGAAAAAAGTATCATGTCTCTTTCATATTTTTTTTTTTAAAA  
AAAGGGAAAAAGAATGAAGGTTAAACACAAAATGAGAAATAATATAAGAAAGTAATGAAT  
AGTTTCTAGAATAGTTGAAGGATAACATCTGTCAAAAAAATTGAAGTATATGATAGTTT  
TGTAATCCTTAAAAAAGAGTTTTGTAAAATGTACACCCGAAAAGAAAACCTTTCTTT  
ATTTTTATTATTAGATTGTAATAAAGCTAAAAGTTAAAAAATATTTATTACAAAATA  
TATAATAAAAAATGCATTTTAAAAAGGAAAATGCAAACTATAGTTACTGATTAAATTA  
AAAAATATTTTTATAACTTTCTCAATATATTATAAATATACATATATTTCAATATTA  
AATATTAATTATTACAGGGCTAAATATTTATTTTTAAAAAATATAGTTGCATTTAGT  
TTTACCTTTTAAATTTATACTATTAATTTTATATTTTTCATAATTTTTAATATTCTAAA  
ATAACTTTATTGCTGTTTATAATAACGTGACAAATATCCATTAATATCACATCACCAAT  
GAATGATTCAGAGAAAAGCAATTTTAAAGAGAAATAAAATTGACGAGAAAAGAACTAATAA  
AAGAAATTTAAAGAATTA AAAACCAAATTTAAGTGCATTGATTAACGTTAAAAACACATT  
ATACACGATATTTAATACTGCCATTCACGAATAAAAAGCG

>Glyma19g33420 | Gm19:41051403-41052402 REVERSE

ACAAAACAAGAATGAGGTAGAATACTAATTCATTTTCTTGAGTTATTTTCTATTTATAA  
AAAAAATTGTTCTTCAAATAAATTTAAACCAAATCAATTAATTAATTCAAATTAGTTT  
GATTTATTTATTTATTTTTCTTTAAATTGAAATCAAATCATCTACAATCAGTTCTACTCT  
TAATTTTTTAAACACAGACATACTTAATCGCTCGATAATTTTTTATAATAGAAATTTATA  
CATTTTAGATTCATATATATTATTTATTTATTTTTATCATATTTTAGATAAAGAAAGATA  
TAATATGTTTTATAGAATGAGATATATAAAGTTACAGTTGTTAAAAAGCGTACATTAATT  
TATTA AAAAAAAGTGTATATTAATTAAGAATATGAATACCTAAAACCTTATTTAAGTATTT  
TTTAAATATTAAGTGTAAATAGTTTTTAAATTTACAATAATATAAAATTCAACTTTTA  
TGTA A AATATGAAATGACAGAACATAAATTTTAAAACATAATATTTTTTTAATTTAATT  
TAATAACCCAAACCAATCAACACAATGTTAATTGATTTTTTTTTAAAAGAAAAGGGGAA  
AAGCCACAACACTGTGTTTATTGATGTAATTTAATTTAATTTGTCTGAAAGTTTTAAACA  
TTAAACTAAATTAATCTAATTAATATGTTAAATTCATTTTTACTATTTTACCCTAAAA  
TTCCAAAAGATCAACCCTTCAGCCTGAACCTCCACAACAAAAGGGGAAGAAGCTTTACA

TAATTTGGGTAATAATTGGTGAGACAAAACAAAAGCAAGCATGTTGACAATCACTG  
AGGAATCCACGTGTGCCTTCTCTCCTTCATTGGTAGCTGAACAAAACACACGACACAA  
ACAACGTTTTCAATTCATTTAGTTTCAACTCAAACCCCTTCCAATTCAAAACCTCAGTT  
GTATCCCTCTCAAATGAATAAATAAACAACCAACCATC

>Glyma15g01010 | Gm15:614670-615669 FORWARD

CGCACGCGAAGGGAGGGGATCAGAACAGAAAAGAAGGTGAGGAATTGTAACCCTAAAAC  
ACCACCGCGCCTTGGCCTGGGGGCATGTATTGTAGAAATGTGGTCCGGTAGGGTAGATAC  
CCCACATTCACCTCGATTACTCCCCTACTGCATGCCTCCTTCTTTATTTAACAC  
CCACAGGCCACAGGTCACAGGTATATACTACTAACACTAACTTTTAACTACTTTTAATTA  
GTATTTTTTTATGTAGTGTGCGGATTAATGTTTATTTATTTACTTCATATTTTT  
TATAAGATTTAATAATTAAGCTAATTTATCAAATTATAGAAACAAGTTAATTTAGTTA  
TTTATCATTTTTAAATTAAGACCTCATATTTAAGGAAATTTTTGAGAAAAAATTTTT  
GGTCCATGTTCTTCACTTAAATTTAGTTTTGGTTTCTATAGTAATTTTCAATCCCAATAAA  
TTTAGTCTTTAACTTTAAAAAATAAATGGATTTAATTTATGTTTAAATTTTTAATATTT  
AATGATGATTTTTTATCGTCCAAAGTTGAAATCAGGTTAAGTTACATATTTTTTAAAG  
TGAGAAGACTAGATTAATTTATGAGAAGTATTGGATAGAAAATTTAATTTGATTTTTA  
TAATATTAATGTTAATAGCTAAATTAACCTATAAATTAATTAATTGAGATTTATAAAAA  
GACTAAAATTGTATTATACTGTACTCGTATCATAATTCTAACATGATTTTAAATTTGAAG  
TAAGTATTTTTTATTTATTAATTAATATCTTAACCAATATTCTAATCATAACTACTGGT  
ATTAATTAATAAAAAAAGAGAACTTTTTAACTATCTTTATTTTATTTTTGAATTCCTT  
AATCATGATTCTGAAAAGTACAAAGAGTTATAAATTTCTGTTGTGGCTGTTCTGTCCTC  
GTGGAATGCTTTAAATAGGAGTATTAGCATTCCCGTGACA

>Glyma08g22720 | Gm08:17236246-17237245 REVERSE

GGGGACAGCAGGTTGGTTCCATACCTCCACTCCAACACTTCCAATTCGTCTGCGAGTAT  
GTAGGATGGTCCGGGAGATAACACACATTCACCTCGATAACAATCAAACCTGCACGCCC  
TACCCCATTTTTCTTTTTGCATTTGTTGTAGCTAGATTTTAAATAAGTTGCTTTTTATA  
ATTTGTTGAGTTAATGTAAAATACTACCCTATTATTATTTATTTTTAAGATTATTATA  
TAAAAATTAATAAATTTATTATATAATAAATTGACATTGGACGAAGATGTATAACTTT  
TTTTCTTAGTTGTTACCATATTTACAGACAATTATTTAGAATAACATTGTGAAAAATA  
CATTAAACAATAATTACGGTAAAAATAAAAATAGTTTCATATACAAAACCTATGCTATTTAA  
TTACTTGAAAACTTTTAATTAATATTTTTCTTTCTTTGAAAAAATTAATTGACCA  
TTTAAATAAAACCATTAAATAAATTATTCTGTAGAATCAAATTAATGAGGCGTTTCGA  
TTGTGTTGAAAGCATATAAGTCAAAGATTAATAATATTATTATAGTAATTTATTTAAGCT  
ATCAGAAAAATATAAATTTCTAATTAGTTTTATTTATTTTAAATTTAAATATAAGAA  
TACATTAAACTATAAGTTTTATTTAAACAATTTTACTATATTTAATTGAAGCTTAGGG  
GTAAAGGTATGCATTAATGGGAGGATGAACAAGAATTAATAATTAATGTGGTCCAAGGCT  
TTAAATAGTGGTACATGTACAATAAAGAGAGGGAGGAAGTGAAGTGAAGTGGTTGAGTTAGCTGAGA  
AGAGGTGCTCCATTAAGGGCCACTCTCATCAAACACTTTGATCATCAAATCCATTTAAG  
TGAATTTGGTTGAATCTGCCAAAACGGGTCTCCCTCTGTGG

>Glyma13g28390 | Gm13:31420737-31421736 FORWARD

AAAACGCGTTGGGGTCTCAAAAATGCTCAGAAGAATATATAGTAGGAGAAAAGTATAGAG  
AAAATAAAGTGGGAAATGTTGAAAAGTAGAGAAAGGTTATTGACTTATTGGTAATCAAA  
ATTCACATTCTCATTCTAATATAGTGCACATGTAATCAATCTGTTGGCAAAGATTTAAG  
AATAACTTTTAAATTTACAGAAAATATATGGATATGAATAATGGAAAACTTTTTTTTTT  
ATGTTTTTTCTTTCAAAAAAATGAATAATGGCTAACAAATCCATTTGAATAAAAAAAT  
TGTAACCTCAAATATGGCAACAGTAATAAACAATAAATATGTCAACACTAACAAATTAAC  
AAAGAAATGATTAACACATAAATCCTAAACCCTAAGTACGAAAGTAAATTAATACGAGTG  
GTTAAGAATTTAAATTAACCTTTTATTCTTTTATGAAATGTAGATTGACTCTATATATG  
TGGTGTACTAAAATCTTGCTCAATAATGAATAACTTTTTAAATAAATATTCTAAAGATT  
ACAATAATGGAAGAACTTAAATATATATACTATCATATCACCCTGAATGTATTGA  
CCAATTGATATATAATTGTTTTAACTTAAATAATGACATTAATTTCAAGTCTTAAATATA  
TTTTTTTATTGAATTTAAGTTTTACCGTTATAGGATTATGTAAGTTTACTCAGCTAAATT  
GTCATAATAAAGTCTAAGATAGTATTTGATAAACTAAAATGAAATGAAAAGTGAATTA  
AAATATGAATTTACCTCATTATATCATTCAATTTAACTTTTTTTTTTCAATTTGTTTTTCA  
CCTCTATCAAATGGAGGATAAGATGTAATAAAGTTTGAACATTTAGCGTGAATATTA

TTGGTACAAGTGTTGAGAATGGAGGGATAGAGCCATAGATGAGGCGGGAATGAGTAATGT  
GTAACAAATAGTTAGGAATGAATGCTATAAATAAGAGAGA

>Glyma15g10660 | Gm15:7747307-7748306 REVERSE

AACAAAGCAATAAATATGTCAACACTAACAAAGAAATGATTAGCACTAATGCGCCGTATT  
CCAGTAAAAAAAAGCACTTATGCGCCATTCTTTTACAGTTATTATATACGGATACTA  
AAATAAATTGATACATGTGGTTAATAATTTAAAATTAACTCTCATTCTTCTAATGAATGT  
GAATTCGCTTCTATGTGATCGCCTTTAAAATCTTGCTCAATAAATAACTTTTTAAAATAA  
TATTCTAAATATTAATAATCTTAGGTTTTATATATTATCTCTCGTCTTTTTTATAGAAAG  
AAACACATATATTATTACCGAACATGTGAATTAATTCACATGTAATTATTTCAACTAAAT  
TAATAAAATTAATTTAAGCCTTAAATATACATTTTTTATTGAATTTAAGTTTTACTT  
ACTGTAATTATGTAATTTACTTCAGCTGAACTGTGACTAATAAAGAATATCTTTAGTCT  
CTTAAAAAAAAGACTAAGATGTATAGTAAAAGTTTGAACATTTAGAAATTTATTAAG  
TAATTTCAATTAAGCATAAAAAAATCAAAATCAAGACAGATTAATCCAGGTACCTATACT  
CTTATTTCTATTTAAAATAATTTCTTAATGTATTGGTTCCGTTCCGTTGCACAAAAATAA  
AGCGGAAAAAGAATGAAATAAATCGTAAACGAGATAAAAATTCACATGTTTACACCTAAGT  
TTTCATTTGAATTCACATTGATTCTATTTAAGGTGTGATATTATTATTGGTAGAAGTCTAG  
AACAAAGTGTGAGAATGGAGGGATAGAGGAGGCGGGAATGAGTAATGTTCAACTAATAGC  
TATAAATAAGAGAGAGAAGTGGTAGTGGGGTCCGTAATAGTGCAAGAAAAATAATTTGCT  
TCTCTCTGTCTTTCTCACAAGGTATCCTCTTCTATTCTGCTACTCCTTGATTGAGCAA  
TAATGTTATATATAAAAATATTACTATAAGGTAACATAAC

>Glyma07g01840 | Gm07:1226063-1227062 REVERSE

GATGAATGATATTCACGGTTTCTTTTAAACATTATCCATGTGACTAATTTTTTTTTAAAA  
AAATATTAATTTTATGATGGATCACACTTTTAAAGTAGAAGAAATAATCTTTAAATGAAAAG  
TATGACCCATCAAATTTGTGATCTCCAACAATTTTAAATCAATCACAAATTATTGGAAA  
GAGAGTATCAATGTTATTTTTCTTTAAAAGTTATATAGACACTTAATATGTTACTCAACA  
TGTAATGAGAGAAAAAAAATATAGATATAATGTGATAAGAAGATAAAGATAAAAAAAAT  
TAAAGTGTAGAGGATGTTTAAAATAATAAGATATTTTTATATTACTCACGTTTTAA  
TTATTTTGCCTTAGAATGACGTGTTACTATACAAAATAAACCAAAGTTTAGATATTAATA  
AAAATATCATTATTTTATAGCGGCACAATTTTCTGTGCATTGTGACTTTAACCTCTTAA  
AGTCCACATAAATTGACCAATATGGCCTTAGATACAGCAGACATACAAACCACGAAATAA  
GTATAAAAATTTGACAAAGTAGGATATTTTTCACCTATAATTACAAAACCTGTTTTCAAT  
AAAGCGCAAGGACGTAATCCATCAATTTCCGTATATCCATCCATGTGAAGTGTGAAGAAA  
ATATGATGTTAGTGGTGATATATAATAAAAACATTCAAACGTGCAAAATACCATTCAAGA  
AGATACTCTTCCCCCTAGTGCTTACGAAGTGCCCTTTTCTTGACACGATTTCACTCTCA  
AGTGCATGCAATGCAACATTCGAATTTGCCACCAGCTGCTCCACCCCTCAATGATGAAAA  
GGAAAAGGCGAAGCTTTTTGTCTTGCTTCTCACTTCATAGATCCTAGACACCTGACAT  
CTTTTCTCTGCTATAAAACCCTTCTCTCCCCACCTCCATATCATGTTCAACCACCATAA  
CAACTTTCTCTGCCTATTTCTCTCCCCTTCTTCTTCTCT

>Glyma10g02820 | Gm10:2014142-2015141 REVERSE

TTTCAACAAAAAAAATAACAAAATATTTGGTTAAGGGTAAAGGTCCACTCACTATCTA  
TCATCTTATAATATAGACTTACAAATGTAAGTCCCGTCTTTGTAAGTCAAGTTTTACTG  
CTTACACAAGTGAAGTTCACAAAGTTTAGAGCTTAATAGAATGGCCATTAACATCTTTT  
AAAATTAGTCTTTTATGTTTTGTACAAGTACTCTCTGATATTAATTTTAGAACTTCTTG  
AAATGTAATGTTATATTTCTTTATTAATGTAATATTTAATTTTTTTTACCAACTAATCA  
CTCTCATAAGATAAAACATCTTACTTATCTCTTTTTCTTGCTCCTCAAATCTTGCAGCA  
ATTAACATATTTTCTTGTTATAAAGTACATTATCATTCTCTTTCTTCTCCTCATACCACAT  
CTTTTGACATTCGTAGTAAGTAGAACTTTTTATTGACATTCATTTTGCATTTTCGTGGAT  
GATTCTGAGATTGCAATAGATTGTTTGCTTCGCAATAATGTTCTTGCATTTAAGACATC  
ATAAGACGATGTTTTAGTCTGATGTGCGTTGACTTCAAACCTCCACATAAAAATTGTTT  
TGGTAGAATAGAGAACTTAGCATGTAGAGTAAGACTCTTTATGACATCAAATAAATTGAG  
ACTACATTATTCATATTTTGTCTTAACAAAATGAAATAAATATAAATTTTGTATATTTCT  
CTGTCATCTAAAGATAAAGGCTATACATGTGCCAAAAGTGACAAAACTTTTTTTTCCCT  
CCAATTATCAGGGGAAATAGAAGTATCTTTAGGTCACTTCTTAATAATGATACAAAACA  
TTCACCAACTTTATTAATAATTAATATAGGTCACAAATTAATAAGAGAAATTTAAAAGAA  
TAAAACAGATTTAAGTGCATTGATTAACGTTAAAAACACACACTATACAGTTATT  
TAATACTCACTAATAAAAAGCGAAGGGGTTCCGAGTTTT

>Glyma07g37220 | Gm07:42357045-42358044 REVERSE

TATAACTCTTTTTTATAAAAACGCATTACATCAAAAACACTAAAGTATTTAATTATCATA  
TTAAAAAACTTTACTATTTAACTCCTTAACCTATGTACATGATTA AAAAATGTGTTTCCTT  
ACTCCTGTAAAAC TATTATTTTCTATCTTTGGATGTTTAAAGTGATTGCACCCGAAAAAA  
GAAATATTTAATAGAAATATAATTTGTTATATTTAACTAAAATGTTCTTATTTAATGTC  
TTGATCTTTTATACTCGCACACGGGTAATAGGTATTA ACTAAGGGTATCTTTGATAAAA  
AAAATGCATTAATTAGCTAATGAAACCAATGAACATTTAATATTTTTTATCTATATTTAA  
TAAATAATATTAGTTTTCAAATTAATAACATAATAACTATTTTATTTTTATTTAATGCTT  
TCTATTTTTTTGTTTTCCCATCAATATCCTACTCCTATGATTATTAGTTAACCATACATG  
CTTTTAAAAAATATGCTAATAAGTTATAAGTTATAATAAAACAATTGAAAATCAACCTTT  
TTTTAATATTTGGTCAACATAAACATACTAACATAGGTACAGTAAAATCCAAAACCTTAT  
AGGTGAGCTGTGTGCGGAAGTGTAAGATTTAAGATGAGGGGTTAGTTCCTTCTATGAATGA  
GCTGGATCCACTCTTTCAGGAGCCAGTGATACCCAAC TTTGAATATATATACTTCTCTAA  
CTTCTAACGTCACAAATAAACAAATAAACACCACA ACTATTATCATAAAAATTACTACT  
ATTACAATAAAAATATTTACTGTATAACATTAATTCCTTGTTTTTAAAAAATTTAAAAACA  
CCCAATAAGAAAAACAAATCTTCCTTAATCCTACCGATTAGTAAAGCTTTTTATTGCTATT  
AATTAAGAATAATTAATGCCCGAGAAATTCAGCGTGTAACAGTGACAAGGCGAGGACA  
TAAGCTTGAGGCGCAGAACAATAGTTATTGTTTTTATAAA

>Glyma05g01730 | Gm05:1209130-1210129 REVERSE

GGCTCAGACAAATCCGTTGTAGCGCCAACTCGGTGATGGGCACGCAACAACATCGTGTTG  
GAGAATGAGTATAAAGAGAGAGACAAAATGCATTAATGAAGGTCGGGGTTTCTCAAATC  
TCAATAACCCCTTCTTTGAAACCAAACAACGACGCATTACTTCACTTTGATGTGTCTC  
ATCGTTTCTACTTGTGTTGTTGTTGATTAGGCACATTCACTCATTGACTCACTTGCTCG  
CTTGCTTGCAACCACACCCTTGGATTTCA TTCATGGCTTCGACCACCCTTCTCCTTCT  
ACACATGACTTGTGCTGCTTGCATGCTTGT CACGTGTGACGTGCGACTGCACCAGAACCC  
CTCACGCAATGTCCCTCTCCTCCAAGATTTCTCCGATTTCTATTTGCTTCTATTGTCAC  
AGGCAATGGTTTCGAGAATTTCA GTTTAGGAAAAGGAGTCGT CATAGAGGTGAATCGCAG  
TGGTGGCGACCAAAGTGATTCCAACATATTGGAGATGTATGGTGACTATAATGAGGAGCT  
CTCTATGACTACGTTTCGATTCATCGGAGATTATAGGATTTAATCATCGGTTCAAAGAGTC  
GAAAGGAAGTGGTGAAGTGAGTAGTGAAAATGATTTTAAATGAAAAATAATAACATGACT  
TCTTAGATTTAAGTGATTAGACTTGATGATATAACATTTTGT TTTATCACGTTATCACTTA  
ACAAAACCAACAAAATACCTTTTTTTTTTAAATATAATTGAGAAAAAATAAATTTTAAA  
TAATAACTTAAAAACAACATAATTTTTTAAATATGAAAATCATATTTAAGTCTTTATTAAT  
TAAAACAAAATATGTCATAATAAAAATAAGATTTTGATATTGACGTGAGAAGAGACAAGT  
GGAGGTGGCATAATCGCTTGT CATGGATTTGCAAAGATCTCTCAGATTTGGATCCTCCGA  
ATCTATCGTCTTTATTATTTTCTGTAACCCTTACTTTTC

>Glyma03g28570 | Gm03:36492239-36493238 REVERSE

ATGAGTTTTGAGCATATTAAGAGAAAGAGAAAGAGCGATTTATCATATGAAAAC TTGGAA  
GAAAAAAAATCATATGAAAAC TTAACAAGTATGAGTGTGTCTTTGATTACGAGATTATA  
TAATGCACGTATATATTATCTTGTTTTATTTTTAGAATAAATAAATTCTTATTTCCATA  
TCAACGAGTTCACATGATGTGATTTTAGGAAATGTGTATAACATATGTCCTATCAAATGC  
AAATTTAATCACATATTTGGACTGTCGTTCAAACA ACTCCAACCTTTGTTTGAAAAGCA  
TTTCTTCTTTACTTTTGCGATGGAGGAGTATTAGACTTTGAACTGTTGTAATTCAAAT  
TACAATACAAACATATGCAAAGTTAATTTGAGAGAAATTAAATTTTAACTTTTAAAGTAA  
GATATTAGATAATCATTGATGTAGCCAATAGATACTTTGCTCATATAACAAGCCGCCAAA  
ATAAAAAGTATGTGAAAAC TCACTTAATAATAAAGAAATGGTAACAAAAAAAAT  
CTTAAATTTATGTGACTACCTTATTTGTTTTTTTGGCTTTGAATAAAAACAAAATTAGTTG  
GGTAAGTGGCTCAAATAGAAAAAAGAGTGGTGGATGGATGTGCATGACATGAAAGATGG  
TTAAGATGCATGAATTAGATAGATGGATGGGCATGGGAAGCAAATCTTAAAAGGGAATCA  
AAAGAAATTGGCCTCTCTTTGCCACCCTCTCCCCACCTGCCCAAGATATGGTAAGCGC  
CACATGATTTACACCCAGGGGAAAATAAAAAGGCACCATTGCTGACCTCACCTGTATCT  
CTTGAAGGATTTTTATGGCCCCACTTTCTCTCTCCTCTCCTCTCTCTCTCTCTCTCTCT  
TTTGCCTTCATCCTACTTTCTAATTTTTT CACATCCCATTTTCTCTCACTTATGTTGTTA  
TATACATATATAAATAAAGGGTCACCTCCCCTCTCTCAAC

>Glyma14g13320 | Gm14:12642628-12643627 REVERSE



TTGTTATTCTATTGAACAATCGATACACACATTGTTAATCAATAATTGACTCATAATCCT  
TAACTAGAATATGGGAGGTATAACATTTTCAGGTGTAAAAAATAACAACAACGGAAAAAAA  
ATAAAATATGGAAACAACATAATTTTGAAGAGATATATACTACGTACAGAACATGAATTGA  
GAATCTAATTCTATTTATAAGCAGGACAACTATGTAGTAGCATTCTGTGATTCTAATAG  
CAGTGTGTAGACACCACGTAATGTGTTATTCTCGTCCTTGTAACAAAAAGTTGTGTGG  
ACATACGTGCTTACTTCTGTTTTATATTCTTTTCCTTGCATTGTAAGGTATACATATATA  
CATGTACGTAGTCGCGCAATGGCTCAATTAGAAGGAAGTTATAACTTATGAGTTTGGCAT  
ACTTGCTCGTTTTTCATGCCAAGAAACGAAAGGCAATAACGAAAGGACCCCAAAAATAT  
ACTTCAAATTTGATTGTCTTCTTGTCTAGTTTAAAAATAGAAAAAAGGTAGCCTACGAAT  
TTATTCAAGATAGGAATCATCCCCATTTTTGGAAAAATATCACTCTCCCTCAGATTTTTA  
GATTGTGAACGAAATCCAGAGACACTTCCCACAAATTCAATGTTGATGCTAACTCACATC  
CAATTTGGTACTTCTTTTTCTTTTTCTTTTTTTTTGAACAGCTCCAATTTGGTACTTTG  
ATAATCTTTTCGATCCATTAATTTCTTTCAATCTTATATCACACCTTACTGAATTATC  
CACATCACATGGGAAGGATATATACGTATCATTTCATATTTTTATTTATTTATTTATCT  
ATATATATAGCACCCAACTAGCTATACATCATCCA

>Glyma04g40640 | Gm04:46635232-46636231 REVERSE

TAGTTTTAGAAAGGTAAAGTAGCATTTTTCAAGGAAAACAAAATTTTACTACAAAATGAA  
AGAAGGCTTATCATTTAGAACTTATTAGGAAAGGAATAATACTACTGGGGAAAAGAAT  
AAATAAAAAGAAATGGAAATATTTCTTGTAAACTACTAAGTTTAGTCCATATAAATA  
TGGATGAATTTAGGAGTGTATAAATACACAAAAGAATCCTAGTGGAGCAAGAGATAATGA  
TGATAGTAGGCTTCTAGAGTTGGGAATATAGAATAGGAGTAATTAAGTAGTTAATGATT  
GGATAAGAAGAAGGCGCTGTATTGTAAGGAAAAAAGTGTCCCTGGGTTGATTTGAAGGT  
GATCCCACCCAGCGCTGAAACAAAGTCAACAGCGTGGGCGGTTTGACAACTTCAAAG  
CCACAAAACCAGACTCTCCCTTGGGACAGAGCCACGTGATACATGGGCAACCTCAAAAAT  
ATCTATGGGAGTGGCTTTAACCTTAATATCTTTCTGCCGGCGGGGCCACACCCTCCCA  
CATGAAATTGGGATATTTTATTAGATTTTGGATTTGGATGGGAAGCCAACTAATACGAA  
CCAAAGAAAAAATATATAAAAGTGGGTGAAAAAATATCCACCACCAGAACCAATGGCTT  
TTGGCTTTGGATCTTTGGTTCGAAAATCAGATCTGATTGCTGACGTGGATCATGTGCCCA  
GCATGTCTAGTGTCTAGATATTTCTGAAACCAGGATATTTTCGGTAGCCGTTGGATCC  
GAGGGCTTTAACGTTGGTGTCTCATCCCACGCCGTTTCGATCAGTCCGATGTTAACTTA  
ACGGTGTCTCTGTCCACCCTTGCTTCCATATATCGCCTTTTTCTTCTTGCTTTTTTA  
TTTTTACCCTCCAACTTCGATGCGAGATATTGTGTGCTTGCTTAGAGAGGTTTTGGT  
CCGCAGAAGATTCTGAATTCTGATGCTCTAGTGCGATTCC

>Glyma06g06730 | Gm06:4812256-4813255 REVERSE

AAAACATTAATAATTACTTAAAAAATTATTTATCAAGCGATTAACATATTTTTCAACTA  
ATAAAATAAATTAATAATCTTATCAAATATCATGTTATTAATAAATTAAAGTCTATTGGTG  
AGGGATAATATTAGGATCCTCTTAATGATTGAGAAATTGTGTAACCTGTACAAAAGTTTT  
ACTTTGTATTATTGTAGAGAAAAAAACTCTTCAAATTTTCGACATTTCTTTAACATTATA  
CATGATTAACGATATTAATTAAGAAGTAAAAATATAACAACATACAAATATAAATTT  
TTTCATAAATTACAGGGTAAAATTAAGGAAAGTCTAATTCTGTAATGATTGTAATCCTT  
AAATATTATTTTTTTGACAACACTACACATAAAAAAGTTGTAGGATAAATGGTTATGAAAC  
AAATTTTACAGGTGCCATATGTTATTTTATATAAGATATATGAGCATTACTTAATTAAT  
AAATAAGGGAAATGAATATTTAATAAAAAATAACATTTTAAATTTAAGCATTTTTTTATA  
TTAGTCTTAATTTATTTGAAAAACTAAATTGTTGTGTTTAACTAAATATTGTGGGTTT  
GCGATAAAATTAGATATAGAATAATCTTAAAAATTAGAAACAAAAAATTAGTAAAAATTA  
GCCAAAAAATTACAAGACACGACACTAAGATTTGAAGGCAAAAACCTTTGAGAATTTTGTA  
GTTTGAATAAACTTTGATGTTTTGGTAAATGAGTTTGGAGTAAAAGACAATTTAATTAAT  
TCAATTTGCATGAACACACCCACTTCACTTCCCACCCGACCCCAACATAATGGATTAGGA  
ACAGGAACCCACAATAATAGCTCTCTCAGTCCATATACAGTCACAGATTCCATCACTTTC  
GCGTTCTATTGTTGCACGCTGACACACACATAAGCACAAAAAGACACCAACTTTTTCGCT  
CCTCCTTGCATTTATTCATTACATTCTCCTCAAACTT

>Glyma17g10170 | Gm17:7595412-7596411 FORWARD

AAATAAAAATATAATTATGTTAAATATTGAGAAAAATAATTTCTTTCTATAATAATATTT  
TGTTTTATAAAAGTCTATAATTGATTTTTCAATCAAATGTTGATTATCCTCGTTACTTTA  
GGTCTTTTTATGTTTATGTACTCGAGACTAAGAAGTTGTGTATCTCGATCAATCTTATTA  
CTTCAAGATTTTTTCATGTTTGTGATTTGAAACACATGAGTTATGTATCATTAGATTTTT







AAATAAATTATGTGAAAACTCATTCAAGTATTAATAAAAAAAAAACAATGATAACAAAA  
AAAATCTTAAATTTATGTGATTACCTTATTTATTTATTTTTGCATTGAATAAAACAAAAT  
TAGTTGGGTAAGTGGCTGAAATAGAAAAAGTGGTGGATGGATGTGCATGACATGAAAGA  
TGGTTAGGATGCATGAATTAGATGGATGGGCATGGGAAGCAAATCTTAAAAGGGAATCAA  
AAGAAATTGGCCTCTCTTTGCCACCACTCTCCCCACCTGCCAAGATATGGTAAGCGCC  
ACATGATTTACACCCAGGGGAAAATAAAAGGCACCATTGCTGACCTCACCTGTATCTCT  
TGAAGGGATTTTTATGGGCCCACTCTCACTCTCTCTCTCTCTCTCTCTCTCTTTTCTCTTTG  
CCTTCTCTACTTTCTAAAATTTACAACCCATTTTCTCTCACTTATGTTATATAGATA  
TATAAATAAAGGGTCACCTCCCCTCTCTACCCCTCAAC

>Glyma11g04440 | Gm11:3007159-3008158 FORWARD

AATGATGTTTAATTAATTGAGAGCGAGCGAGGGAGGGAATAGAAAGAATAAGGCATTTTT  
GGAGGGTGTATAGTAATGGGATTGAGAGAGAACTTTGTAATAATGAAATGGTGAAGATT  
TGAAGAAGAGAGGGAATGAATTGAAGAGCTTGAGGGGGTTGAAGCATGCATGGCTTAG  
GGTAAGAGATGAGAGGTTGATGACGATAAAAGGGGCTCGGAGAAGAAGAGTGTGCAGTT  
GTTGCGGCTGAAGATGACAAGGTGTTGGATTTAGGAAGAGATTTGAGACAGAGAAGAAAG  
GGAGGAGGGGACGGAGAATTGCTCATAGAGGGACAAAGGGTTTTTTTACTTTAATTGATT  
TCGGATTAATAATCGTCAAGAAAATTTAAATTTAATTTGATTTTAAAATAAATAATTAATGA  
TTTTGAATAATCATGAATCATGTGATCAAGTATTTAAAGGATATCTCATTACGATACAG  
ATTTAAAATAAATAATTTCAAATATTAATGCAATACGAAATTTTTTTATAAAAAATTA  
ACACAAAATTAATATATATTAGAAACAAAATATATTTAAATCATGTTTTTTAATCA  
CTTTAACATACATCTTTTATTAGAAAATGAAAGGAAATTATATAATAATGAATATGT  
CGTAATGATGCAAGACAGAATGAGGTAATAGACAAAATTCATTGTACAGGAACAAACTA  
TTCTGGCGTAAGAAATCAAGAATAAAGTATTAATTTTCACTCAAATATAGGAAACATACCCA  
ATCTTATATAGTAGAAGACAATGCATTTATTTCACTCAAATATAGGAAACATACCCA  
AAAAAAAAAAAACTCAAATATAGGTAACAACATCTAATGTTTTTTTTTTTTTATTATTT  
TACAGAAAAAAAAAATGGTAAGAAATGAGGGTAGATTTGGAATGAGCCTTGTAAAGACTTT  
TTTTCTGCATATTATTACGTGGTCTTATTAAGGAGCGAT

>Glyma04g29250 | Gm04:33371184-33372183 REVERSE

AATATCGTAGACTTGTAACCTACTTTTTTTCTAAATTTCTCTAATTATTTAATT  
AACTCAGGCTACTATTAATAAATAAGAAAAAACTAAAATAGTGGAAATGGTCTAAGAAATAG  
CTCTGAGTAAATAATTAATAAGAAAAAACTAAAATAGTGGAAATGGTCTAAGAAATAG  
CAACAGAATCGGTTAGGAACCTTTGAAGTTGAAAATTTCTACTATATGGTTTATGCGGTC  
AATATTGGCTCTCAAGAACGACTAAAGACAAACAAACATTTTATAATAGTAATCAAAGC  
AAGAAAATTACGTTTTGTATTGGCTTGTATAGTTGTACTAGTACGAGGGTCATCACTTAG  
TGCTATGCAGGTCATGCACGTGCATGGAATAGAATAGAATCCACACGACTCTGAACACTG  
ACAATGATGGTTTGGTCTCGTGAAGGGCAATAGTAGGGTTAAGGCTTAAGAGAACAGT  
GTAGCACACCCCAATAGTTGTCTTTTTTTTTTTTATCCACAGTGATTAGGGCATTGAG  
TTCTGGTGGGACCTGAGATACCCGACAAGCTTCAACTTAACCTTTGAGTTGATTATGTC  
ACACTAAAATTCATTGTCTTTCTCCAGATTATGTCTTTCTCCAGATTATATGTC  
CCCCACGAATTCAGAGTGTGTTCTCAAGTGTGTTATAAATTATTGAATTCAATAATTTTG  
TCTTTAACCATAAAAAAAGGGTCAAATAGAATAATAATAATAATAATAATAATAATAGT  
AATGAACAAGTCAGATTTTGTGTTTGGTACAATAAGAGCACCTTTCTTTGCTTGTTTTTT  
AATTCAAAAATCAACCCAGAAAGATCCGCCAGATTCTTGATGAAATCTGTCGGATCTTGC  
TTTCCAACTGTCAGATTTCTTGGTGGCATTTTGTATCCTTCTCGACTATGATGTGTGC  
TCCCCTTTTAAATGTGCATGCCACCCTCCTTCATCTTC

>Glyma04g34820 | Gm04:41064879-41065878 REVERSE

GTCTTTGTTTGTAGGGACTGTTATAACCTTTGTAATAATTCTTTGCTTGTAGATAATAG  
TCGAAAACCTATAAATAATGTTAGAAATAAACATTTATTTATAGATAAAAGGTAGAAAAT  
AAATGTACATTGTAGATAATATTTAACCTTATAGATAAATTAATTACCTGTCAATAGATAA  
GGTTAGTCAAACATATTTAAATATTAAGAAGTTAAAAATGACTTGTGTTGTTGGGAAGTCC  
AATTGAAGACTGACTATTTGTGGGTCTGAACAATATAAATTAGATTTACATATATAAAC  
TATAAATCTAATTTATGTTCAAATCAAATAGGACATAAATACACATAAAAAAATCTT  
TTTCTTTTCTGCTGCAATGTAATGCAATTTACAACCTGCTGAGAAAGAGAAATTGCATG  
TGCTCAAAAGGCAATAGTAAAAAGAGAAAAAATTTCAAACGTGTTGTATTGTGTT  
GTTAAAGTCGTATGCTTGTTCAAAAGTTAGAAAAAGAAAAAGTATTGGATTGTTCTTAG  
TAGTTGGTTGGACTTCTCCTTAATCCCAAAAAAATAAGTAAGACAACCAATCTCATTTT

TTAAATAAAAGCATTCTCAAAAATATAATCTTAACCAACTAAAAAATCTGTCTCAATCAT  
ATTTAATAATTGAAAAAATTAATACGTCAACGTAAATTCCACGAAATTGTAATAATAAAA  
CGTAGGAAGTAAAAAAGGTGATGATCGATCTAGGATCTAGGTACGCGTAATAGATGGTTC  
AAAATCTGAAGTCTGAACCGTGTGAAAGTCAAAGATGGCTCTCGGAAGGATGCAGAGAGA  
GCGAAGGTGGACCCAAAAAAGATACGTTTTGGTCTTGTCTGACCATCAATAACGTTACTGT  
TTGTTAATTTTTAATAAATAAAAAAGAATGATTGTGACAGGAGAAGCGACAAGTG  
CAGGTGGGATAATCCTCTCTGCTTCATTTCCAAAAACAAC

>Glyma13g19870 | Gm13:23357492-23358491 REVERSE

ATAGCCTTGAGCCTCATGTAGGTTTTCTGCAACTACCTGGGGGTAGGGGGGGCTCCTTTC  
ATTTGAGTATGTGTATAAGAGGAGAAATAATTACTGATCTGATGTACATGGCTGAGAAAT  
TAATTATACTGATATTTTATTCTGCTTTGAAAACCTTGGAAATTGATATTTTATTTTTTTTT  
GAAAACCTTGGAAATGATGTAACCTATCTGGGTTTATCTTTTGTAAATTGTATATCATGTA  
ATGGTTCACCTTTGAACCTAACCTGTTAATGTGAAAGTTTTATTTTTCAAATTACAATC  
TCTAAAAAATTTTTGTGCGATTGAGTAGGTAGTGTGGCACATTTTGTGTTGCTAATTTAAT  
GCAGAAGGTTTCATTAGTTGTTACTGTCTGATTATCTTAGACCCCTGAATGAGAATGAGAA  
TGAGGGGGAGGGATCAGCTGATGGTGTGTCTTTTCTAGGAGAAAGAATGCCAACTTGATA  
GGTGGTTTTGCCGGGATTGAGAATTCTGATATGGGATTGATGAATATAGGGAAAGAGGT  
GTGAGTGGGAGAGAGGAGGCAGACATAACATGACTTGAGAGAGAGGAGGAAACCTCTGG  
TATAGGAGTTGTAACCTCTGGGGGAAGTGTGCTCTTGTGGGTACAATTTCTGATAATTGAA  
TGATACACCTCATTTTGCATTCATCTCTTACTGTTTCTGTGACTCTGTTTGTGGTGTCT  
ATCAGACTAGGATGGAATGCTGTTATCATTGTTACTTGCTAGTTGCTAGTATATGAAAA  
AGTAAAGGGCTAGAAACCTCATAACTTAGCATGTCATTCATTAAGACACATCAGTTTCAA  
ATGTTTTAGTAATGAGGTAACAGTTTAAACAGCAAACACCACAAGTCATCAGCATACTGG  
TTTAGGACTAACTTGCCAGTATTGCCATATGGAGGTCATGTTCTAATTCTGGTAACCAAA  
AGCTACTTGACAAGTTCTTTGTTATCTCCTGTTGCAGAGC

>Glyma01g40900 | Gm01:52560382-52561381 REVERSE

GAGCTTTATCTAGCTTTTAACTGTCAGTTAACCATGTGTTGATTTTGCCAAATACACCAT  
TTCTCTCTGTTATAAAATTTGATCTGGTTTGATTTGAAAACCTTTTGTCTGTGCTATAAA  
ATTAGCATTCTTATCTACCCGTGGTTTGCATTGTTGCCACATAGGCGCCCTATTTGGTGT  
ATTTTTCTGCAATTTTCTAACACTAGGTACACATTAATAACGACATATTGTGTTACATTT  
TAGTATTTTACCAATTGCACTGTATTTTGGAAAGTGCTTTATTTCTTGAGTTATGAAATT  
ATACAATTATCTGATTTTTTCACTATTACCGTACTACCGTACACTTTGGATTACGTACG  
TAGGATAAATATTGTGCTGGATAATCTCAAATTTAGAAGGAAAAAAGCAAACAATTTAAT  
CAATACTTTGGTATTAACAATTTATAAACAAAAAATAAATAAAATAAAGTTTAGTT  
TTTCTAGGAAGAATAAAATCACAAAGAAAATACAAAATAAAATTGAAAAGCTTGACAAA  
ATTGAAAAAACAATGTTGGTTTGTTCGTAACAAAGTGTATTTAAACCAAATTGC  
AAAGAGTAAAATGCTTTTTTATTACATTTTAAACATACATCTTTTATTAGAAATGAAGG  
GAAATTATATTGATGACTATGTCATAATGATGCAAGACAGAAAGAGGTAATATAGAGCA  
CAGGAACAATAATTTGGAGTAAAAAATTCAAGAAATAAAGTACTATTAATTTTCATT  
ACAAAGAAAAGAAGTTTCAAATTTTATAGTAAGACAATGTATTTTCAACTCA  
AATTATACTGTAGGAAACAACATGTAATTTTTTTTTATAGAAAAAATGGTAAGAAATGA  
GGGTAGATTTGGAAAATGAACCATGATTGACCATAGTGAGAGACTCTTTTTCTGCATATT  
ATGTGGTTCTTAAGGAGCGATGGCAACTGTTTCAGTAGTCA

>Glyma09g04470 | Gm09:3298206-3299205 REVERSE

AAACTGACTATCTAAATTTTTACAAATTTAACTTTCAAAGATTTATACAGATTAGGAAA  
AAAAACGTCACAAACAATAAAAACATTATTAGGTCAAATAAAAAACACCATTTAAATCT  
TACTCTTTTAAATAATTAATAATTTCAATGAAACATATTCATTCTCTTTAGTTAATTCA  
ATTCGATACATTGATGAACAATATCTTTTTATTAATAATAGAATAATCATTTTAAATAAC  
ACTTAATTTATACCTTTGATATCCAACCCATAATTAGGAGCATGTTTTGCTCCCGTTTT  
AAATATTAATTAATTTACCATTATAACAGAAGAAAACTTGGGAGAAAAAATAAAGTG  
AGAACATTGAACATGTTCTTTGCTGAGTTTACTACTTTAGAAGTGTGTTGTGACCTTTG  
TGACAGCGTTGGAAGTGGTTTTGAGATCCGAGGTGGAGGTTAGTTAATCCAATCCAACC  
AATGAGCTGGATCCACTATTTTCAGGAGTGAACACCCCAACCTTCAAATATAATATTA  
AATTGTCAAAAATAATTACACAACACTATCATTTAATATTATTTTTAGGGGTCTAACT  
GATTGAATAAATTTGTCAATTTTAAATATTATTTTTAATTTTTATGGATAAAAAAATA  
TTTTAGTAATAACATATTTTTTTTTGATATCTTAATTAATAGTATCATTTTATGGAAAGT

AATAAAATATGCCAGAACTGAGCATGAGCTTCAAACGGAGGAGAAGGCTTTCAGAATCA  
GACCCACAATCATTTCATTATTTATATGCTATATTATCTGCAGCCAAATATAAATTCCA  
TTACCCTTTTCTCAGTTTCTTCCCCTGAACTCCATAAATAACTCACTCTTGTATTATTT  
TATGTTTTTCACTTCCATGATGCCAGTTTCAACCATGTGAAGTTGTTGTGTGTGTGCTGT  
GTTTGTGTTGTACTGTTTTGGATCTTCAGAACCAACC

>Glyma19g35470 | Gm19:43059114-43060113 FORWARD

AACATAACAATGGAAAAAATAAAATATGGAAACAACCTGATTTTGAAGAGATATACTA  
CGTGGAGAAGATGAAGAGAGAATCTAATTCTATTTATAACCAGGACAACTAGGTTAGTAT  
AGCATTCTGTGATTCTAATAGCAGTGGTGTAGACACCACGTAATATGTTATTCTCGTCCT  
TGTAACAACAAAGTTGTGTGGACATACGTGCTTACTTCTGTTTTATTCTCTTCCCTTGCATT  
GTAAGGTATACATACAGAGTCACGCAATGGCTGAATTATAAGGAAGTTATAACTAATGAG  
TTTGGCATACTTGCTCGTTTTTCATGCCAAGAAACGAAAGGCAAATAACGAAAGGACCCC  
AAAAATATACTTCAAAAATTTGATTGTCTTCTGTCTAGTTCAAATAGAAAAAAGGTGGC  
CTACGAATTTATTCAAGATAGGAATCATCCACATTTTGGAAAACATCACTCTCCCTCA  
GATTTTATGATTTTGAACGAAATCCAGAGACACTCCACAAATTCAATGTTGAAGCTAAC  
TCACATCCAATTTGGTACTTTGATAATTTCTTTTCGCTCCATTTCTTTCAATCTTATATC  
ACGCCTTACTCGATCAATTATCCACATGGGAGGGATATATACGTGTCATTTCAATATTTT  
TATTTATCTATCTATCTATATATGTATATAGCACCCCAACTAGCTAGCTTTACATCATC  
CATTTTCATTCTTCCCCTCCTACTCATAATAGTGAGTTTACTCTCAGAATTTGGAGAAAG  
AGTTCTCATTGAGTTAGTGATATTGCTACATTATCCTTAAATCTACACAAACATTTAGC  
AATTAATATATATATAAATATCTTTGTTTAAACAAATTAACCTCACTGATTTTTCTTTC  
AAGTAGTAGTGTGAGGAGACGTAAAAAGTTACGGAATCCAAAACAAAAACCGAATGGCA  
CCTAAAAACTTGGGCACCAAATTAACAGCACTTGTGTAG

>Glyma05g27670 | Gm05:33567353-33568352 FORWARD

TGTTCAATAAAATAAATTAATTAAGAAACATAAATATAAACTGATCATGTTAACTTGG  
GTTCCAATTAATGTCTTGGCTTGTCTAACCATATTCTCTTGTCTCTAGAATGCATTCCAC  
GTGCCTTTCCACAACGGTTTATCTTCTATTTTTCTTTTCCAAAAGATACTACTAACAG  
ACAACATAGAGGTGATGTTTTCTTATGTATATATCTTGTCCCCTTTTCTGATAAATTCC  
TATCTCCAACATCTTTTTTTCATAAAGAATACGGCTTGATACTTGTGTTTGTCTTGTCT  
TGCAATTTAAACCGTATATCACCCACTTCAACCTCATTAACAAATATGTAAGAAACAGA  
AACCAACCCGTTAGCTATTATAAATATTATAAACTTACCTCTTAAAATTAGAATAGACC  
TTATTATAGATACAGTTTGCAGAAAACCATAACCGCTAATAAAAACACACTCTATTTTC  
ACACCATTTTCGCAAAAATGAGCCTTTTTTTATTGCATTTTAAAAGCATGACTCTGTCT  
TTTTCTCCTGAGATAACTTTTTCAATTGAACAATCTTGTCTACTAACTTTTTTGTGTTAT  
TTTTAATATTAGTATCGCAAAGCAAAAACCAACCCAATATTTTCTTCTAATTCTCATCAT  
CTTTGTACATTGAATTTGCCATCTTTTCATAAAATTAATCTCATCCTCACCATGCTTTT  
TTCTTTTTTATGTCTTTACTCCTTGTACTCAAACAACCTTCTTGTTCCTAGTACAGTA  
CTATTCTTTTTCAGCACAAGATTGGAAGACCATAACGTGCGCCACTGGGACCGTTAATAT  
TCGTTAGTGCTTTTTGTGTCAGTGCATGAAAATATACATATATAAATATACATATATTCC  
CTTACCTTAAATTTTAAATTAACCCAATCAAGCCAACCCCATTTTTCTCTTGAACTCA  
CAAGCAGTGATCCACAGGACTCGTCTCTCTAACTAACAAC

>Glyma04g42680 | Gm04:48368798-48369797 FORWARD

CATGTGAATATATTTAACACCAAAAATGCAATTTCTGTCATTTTTTTTTTATATAAGAAAC  
AGATATAGAGACACAAAATTATCAGTGCCAAACGTCACAATATAAAAAGAGATCAGTGG  
CCAAAATCATTAGGTTACATGAAATGATAGTGAATATTTTCATTAATTAACCTGAATT  
TCCACAACTTTTTGAAAAAATAAACTGCAACAATGGTCTTTTTTCTTTTTGTAACAA  
AATGATGATAATAAAATGGTTCTATTAATTAGGGGTCACATCCTACATTCCCAGCGAA  
ATGTTAGGCTAAAGTAAAGTAGGCTGAGGTAAGATTATCCGTTAGTTGGAGGAAAGTCTC  
CAAATGATCTTACCCAATGCATGCACTTTAGATTTTACACACAGCACTGTGTATTTTAC  
AATGGCAAGAATATTAATAAAGGCAAAAGCGAACAAAATAAAAACCCCACTCATTGCC  
CAGGAAAATTAATATATGTAGTTGAGAAAATTAAGAGGAAAGTAATGGCGGTTTAATTAG  
TTAGGAAAGAAGGGTTGTTGCTTTAATTTTCAAAGTGATGCTCATATAATTAGAATAGG  
TCTGCTAACCATTAATTAAGAAAAAATAATTTATTATAAAAATTAGAGAAAAAATAAT  
AAAAAATTGATTATAATTTTATGATTTCAATAAAAATATTTTTTCAATTCCTTAATCA  
ATATTTTCATAACACTAATTATTGAAATAAAGGCAATACTATCCGCACCCCAATTC AAC  
CTTCTTTCCATCATCATGATGACCGAATGGAACAAAGATCTTGTGGTTTTTCTTAGCAA

TCAAATAAAATCCAATTGAAAGGGGAAAGAGAGAGAAAGTTTATGTGTGTGGTGGTTGTA  
CCAACGCGGTAGAGAGAATCTAGGGAGAAGATCTCAGCATGAAGGCACACACATAAATA  
ACACTACATCCATGCCACTGTGCCACCACAGTTTTTTCTCT

>Glyma07g26890 | Gm07:29690532-29691531 FORWARD

TTCCATAAATTTATCAAATTAATTTTGTACTTAATAGTTAATGGCACGTGACAAATTGT  
GGAAAATATCGTATAGGAAAATTAATATCATCAGTACAGAATCCTAACAAACCAATTA  
TTTGGTCAATTGAAATCCTTAATGCTTTGTTGGTTTATGAATGAAAGGTACAAGTAA  
GAAGGTGAAAGGAAATAAAGAAAAAGAACAGAAATTAGAAAATGAAATAATTTTTAGGT  
TATTTGGTTGTATATAAAGTGAGAGAAAAAAAATTGGCTCTCGTGTAAACAATTTGTT  
AACCTATATACATCATGAGACAAGACACTTATCGAGAGAGACCTAACTGCACTTGAAT  
TGTTGTGTACTAATAAACTACTAGTACGATATAATAAAGTGACGTCGGTAAGTGTCTC  
AAGGTTAATTTAATTATATAAAGTAAATGCTAACTAATGTATTTGGGATATTTAAGA  
ATTAATAAGTAAATATTTTCATTAAGGTTGAAAATTATGTTGTTGTGTGACTTTTT  
TACATTTTTATATAATTTTCATAATAGATATTTATTTAATTTTTTAATTAATGTTTTAA  
AGACATAGGTTACCAAAAATTTTAAAGACAATAATATTTTTTTTATAATCAAGAGATAT  
TTTTGACTTTTTATTTAACATTCATTAATTTCTTTCTATCAGATTCATTTATTTAGGA  
TAAAAATATATCTTTAATTGTAATTTTATGTTTAAAGTTAATTATCAAACCTAAAACCTCA  
ATTTAAAGAATAAAGCATCAAACCATTGATAATAATTAAGAAAAGAAAGAAATATAGTA  
TTTAATATTAATAATATTTTTCTCAAAAATAATTAATAATGTATTTAATCATTAAAT  
TTGGCGTGATCTATTTATTAATATCTTTCCAACCATTATCATTTTTCGTCCCCTGAAAT  
TTTCCATTTCGCACCTTTCCATTTTTCTTCAGTCCCTCC

>Glyma05g00880 | Gm05:506430-507429 REVERSE

AATTAATAATTTAAAAAATTGAGTACTAAAAGTTTAATTAATCCTAAAACATATTTTCG  
TTTGTTTTTCCGCAGACAAATAATGTTAAAAAATCAAGTAAATTTACTTATATAGAATA  
GATAAGGTTCTGCAAGTGGCATTCTGACATTACTTATCAAGTAAATTTACTTATATAGGA  
TTTTTGTCTTTTTCTTCTGCAAGTGGCATTCTGTAATTTATATTCCTTTTAGTTACTA  
TAGTGAATTTTTAATCCTAAAAAATAAAATATAAAGTTTAAATCCTAAAAAATCCACTTA  
AAGAAATAAGTTTAAAAAATAAATGAATAATTAAACTTAAAACATTAAAAAAGAAAGA  
GAAATACATAAGGGGACTGAAGAGGATATTTGGGATATTTTGGTGAGATTGTGTCTCCT  
AAAATAAGGGAGATTTGGGGAGTGACGTGGCCTGCTCTCTATCTCTAACTAACTATCCAG  
ACCCTAACCCACTCATATCTATTTCTATTTCTCTCTCCTTCTTTCCACGTCAACCCT  
CTACCCTTTTTGCTATCCTACGCCCCCTTCTCTTCTCCTTCTTCGCACCTTAGCTCCCA  
CCACCATCTATTTGGTATTTTTTCCCCTCAGATTCAAATCCCAATCAATCCCTAGCAC  
ATAAACTCTCATGTTTGTCTCACAACCTCACTACTGGCTCAAAAAAAGTTTGATTTTT  
TTTTTTGGTTTGAGCTGCTAACGTGCGCCGTCTCTCCAGACCTGGATTTTGTGATGCT  
ACAACGATCAGCGGATATGAACAAATGGGTTTTGAGTTTTATGTGTCTTACTGGGGGTG  
TGGTTGCAAGATTTGATTTTGTATGGAGCTTAGTATTGGGTTGTTGTTGTTGTTTTT  
TTTAGTACAGGAAAGAGTGGTCACGATGGATGCTGAAACTGAGACTGAGGAACTATAAA  
TTTGAACGATAAATCAAGTAACTTTGGTGGGAATAATAGT

>Glyma06g19870 | Gm06:16215244-16216243 FORWARD

GTCAGAGATCAAATGCTAATTCCTGTGAAAGGATTATGTAATCCTAGATTATGGCT  
CAATCTCCATTATAGATAGATATTAGTGAGTATTCCTAACACTTGCAATGAAATAAATG  
ATAAATTTTATATTTAAAATATTCTTTGATAAATAAAGAAATAGGACATAAACATACAAA  
TATCGTGTAAAAAATAAAGTCAAAGAGTACACCATAATTTGCTACAATGTTATGCAAAAT  
TTACAACCTGCCGAGAAATTGAGAAATTGCATGTGGGCAAAAGGCAAACTAAAAAAG  
AAAAGAAAAAGATTCAACCGTGTGTTGTTGTTGTTAAAGTAAGGATATGTTTATTCAA  
AAGTTAGAAAAAAGAAAAAGTATAGTATTGGATTGTTCTTTTCAGTTTGTGGACTTTGC  
TTAACACCAAAAAAATAAGTTAGAAAATCAAATCTCACATTTTTTTAAATAAAGCATAT  
ACAGTAGTATAATCTAAATCAATTAATAATCTGTCTGAATAATATTTTGATAATTGAAA  
AATTAATTCGCAACGTAAATTCCACGAAATTGCAATAATAATAAAGCAGGTAATAAAGCG  
TGATGATCCAATCCAATCCAATCCAATCCAATCCAATCCAATCCAATCCAATCCAATCCAAT  
GGTTTCAAAATGTAACTGTGTGAAAGTAAAGTAACTGTGTGAAAGTCAAAGATGGCT  
CTCGGAAGGAAGGAAACAGAGAGAGCGAAGGTGGACCCGAACAAGATACGTTTGGTCCG  
GTCTGACCATCAACAATGTTACTGTTAATGTTTTTTTTTTTTTAAAGATAAAAAAGTATG  
ATTGTGACAGGAGAAGCGACAAGTGCAGGTGGGATAATCCTCTCTGCTTCATTTCCAAAA  
ACAACAACAAGATCTCTCAGATTTGATCCTCCGAATCTCCCTCTTTTCATTTTCACAT

TCTTCTTATTATTTATTCACCCTTTTCCCCTAACTTCACC

>Glyma07g05530 | Gm07:4170107-4171106 REVERSE

ATATAATTTACATATTTAAAAATATATAAATTTTAGTTATATAAAAATAAATATTTATTAT  
GTGAAATTTAAATATTTATTTCTATTAACAAAAAATATACTAATCTATGTCTTGTCTAT  
ACACATGTCATCAATCTATACTGTATGAGCTACTGTTTGTTTTTTTTAAATCTTTTTCC  
GCTTACTATTTTCCCTTCTCTTTTTTCTTTTTCTCCTTTTTCTCTCCCTGGCCATGCAT  
ATGCAGGAAGTGCCTAGTTCTTTTTTTTTCTTTTCCGAGGGAGAGAACACTGCCAGTTCC  
AATTAAGTAAACAACGTGCAACTTAAATATAAGCTTAATTATTAATTTGATTTCGTACCT  
TATTTTAAATAGTTGAATTTGGTATTTAAATTAAAAAAATTCATCAAATTTTTATAAATA  
AATTAATTTAGTCTTTAAATTTTTAAGAGATTCAATTTAATCTTAAATTTAGAAAAAGAA  
AAAAACAAATCAATTTAATCTACAAATTATTTTAAATAATTCTTGTCTTAAAGTTTTAA  
AAATTTTAAAAATAAATTGACTCAATTTTAAAGAATTTGAGAATCAAATTAATTTTTTAAA  
TTTTTTTAAAGAATAAATTAATTTAGTTTAAAAATTTGAGGATCAAATTGAATCTTTTAAA  
AATCAAATTAAGTCATTTAAAATAATTTAGAAAATAAATTAATTTGTTAAAAATAATTA  
ACCTAAATATAATTAATGTAGCAAAAAGAGAATGTGAAAATGAAGAAAGGAACAAGAAAA  
AAAAGTGAATTAATTTGGGATGCTCCACGTGTTAGGCTGTACACCACGAGATCAAAGTA  
TTATAAATAAAAACCGGATATGACTGTGCAGAAAAATATCGGCCGGAGAGAAGACGTA  
GCGTCGCCACATGTCCATTGGGTGGACCCCATGTGCAAATATTAATAAATAAACGGATGG  
TTGAAATGGTGCCACGTCAAGCAGAGAGTAGCGATGATCT

>Glyma15g15520 | Gm15:11936641-11937640 REVERSE

TACAGATTAGGAAAATAAAAAAGTTATTAGATCAAAATATAAAAAACCATTTAAATCTT  
TACTCTTTAAGTAATTAATAATTTCAATGAAACATATTCATTCTCTTTAGTTAATTTCAA  
CTCGATGCATTGATGAACAATATCTTTTTATTAATAATAGAATAATCATTTTAAATAACA  
CTTAATTTATACCTTTTATATCCTACCTATAATTAGGAGCATGTTTTACTCCCCATTTT  
AAATATTAATTAATTTACCATTAACCCAGAAGAGAGACTTGGGAGGAAAAAAAAAAGTGA  
AATAAAGTGAGAACATTGAACATGTTCTTAGCTGAGTTGTGATTTACTACTTTAGAAGTG  
TTGTTGTGACCTTTGAGACAGCGTTGGAAGTGGTTTGGAGATCCGAGGTGGAGGGTTAGTT  
AATCCAATCCAACCAATGAGCTGGATCCACTCTTTCAGGAGTGAACACCCCAACCTTCAA  
ATATAATATTAATAAATGTCAAAAATAATTACACAACACTAGCATTTTAATATTACGTTA  
AAGAGTATAAATTAATTTGATTGAATAAAATATATTAATTTAATTGTTATAAATTTTTTAA  
CATTATTTTCTATTTTACGTATGCAATTTTTTTTATATTTAATAGTAGTGTCATTTTAT  
GGAAAGTAATAAAATATGCCAGAACTGAGCATCGGCTTGAACAGAGAAGGCTTTTCAGA  
ATCGGCTTGAATCAGACCCACAATCATTTCCATTATTTATATGCTATATTATCTGCAGCC  
AAAAATAAATTTCCATTACCCTTTTCTCTGTTCCCTTCCCCTGAACTCCTTAAACAACCTCAC  
TCTTTTATTATTATTATTATTATTATTATTATTATTATTATTATTATTATTATTATTATT  
TTGTGTTTCACTACTTCCATGATGCCAGTTTCAACCATGTGAAGTTGTTGTGCGTGCTGT  
GTTTGTGTTGTGTACTGTTTTGGACCTTCAGAACCAACC

>Glyma11g21650 | Gm11:18788152-18789151 REVERSE

ATAAAGCAAGAAAATTACGTTTTGTACTGGCTTGTATAGTTGTACTAGTACGTGGGTCAC  
TTAGTGCTAGGCAGGTGCATGCACGTGCATGGAATAGAATAGAGTCCACACGACTCTGATG  
AACAGTGAACAATGATGTTTTGGTCTCGTGAAAGGGCAATAGTAGGGGAAGAGAACAGT  
GTAGCACACCCTATAGTTTTATCTTTTTATTAATCACCTTAATTACAACATTTGATTA  
TTTGGTAGGAACCTTAAATATTTTTATAAATTTTAAACCATTTATGTCATACTTAAAGATTAT  
ATTAGACAAATTTAACCGGAGGCTCAAAGTTAAAAGACAGCTAGAAGTTAAAAATTATT  
TTATTAATTTAAGTATTCGATAAAATTTACTGTCAAAGTAACTTAAAAATATAAATAAT  
ATATTTAAAAGGATTATAAAAATTTAAATAAATATTTTAAAGGCTAAAAAATAACAAAT  
AAAAACTAGAAAGGGACATTTTAAAAAATTTACTTCAATTAGTGTTAAAAAATTAGAA  
ATTATTTTAAAAAATTATTTATTGAAATATACTTATTCATTCAATAATTAACATAAAT  
ATCTCGTAGAACATAGTTTAAAACCTTATTACATCTCCTCAAGAGTGATTTTTTTAGAAAT  
CAAACCTCAAATATTCTCTAGTAGCGTGTGTTATCAATTGAATTATATTTATTCATTCAA  
TAATTTTGTCTTTAACAATAAGCAAAAGGGTCAAATAGAATAATATAATAATAATAATAG  
TAATAACAAGTCAGATTTTGGAGTTTGGTACAATAAACAGCACCTTTCTTTGCTTGTGTTT  
TCAATTCAAAATCAACCCAGAAAGATCCGCCAGATTCTTGATGAAATCTGTCCGATCTT  
GCTTCCAAACTGTCAGATTTTCTTGGTGGATTTTTGTATCCTTCTTGACCATGATGTGT  
GCCCCCTTTTAAATGTGCATGCCACCCTCCTTCATCTTC

>Glyma06g12100 | Gm06:9319364-9320363 REVERSE

CACTCATTGCCCCAGGAAAATTAATATATGCAGTTGAGAAAATTAAGAGGAAAGTAATAG  
CGGTTTAATCTATCTACAATGGATATAATAAACTAATGTACGCCGAAATTACCTCAATA  
ATCTCCTTTATAGATGGGTTTTTCAGTCTTCTTACAGAACTTGATAATTGCACCTCCTTT  
TTTATAAGTACACCCCAAATATTCTTTTTAAATCTTAAATACTTATTATATCCTTTCTT  
TTATCTCTCATACATTATTTCTTTAACGCATAAGCAATGGTATTATGTGTGCATACGCGT  
GGATATCATACCAGTTAGTTAGGAAAGAAGGTTGTTGCTTTAATTTTCAAGGTGACGTAC  
TCATGCACATATGTAATTAATGATAAATGCTAATTAATATTCTTAGGATATTGATCAA  
ATTTTTTAATTGAAATGTTAAAATTATATTGTTTATAATTTATTTTACATTCTTTTATG  
ATTTTTATAGTATTTTTTTTTAATTTCTTAAAGTATTGATTAGCATGACCGATTAGAATA  
AGCCAATACTATCCACACCCCAAATTCAACCTGCTTTCCATCATGATGATGACCGAATGG  
GAACAAAGATCTTGGGTTTTTCTTAGCAATCAAATAAAATCCAATTGAAAGGGAAAAG  
AGAGAGAGAGTTTTTATGTGTGGTGGTTGTACCAACGCGGTAGAGAGAATCTAGGGAGAA  
AGATCTCAGCATGAAGGCACACAAAAATAACACCACATCCATGCCACTGTGCCACCAC  
AGTTTTTTTTTCTCATGCACCCACTAATAGCAAAACCAAAAAAAAAAAAAAGAAAAAGA  
AAAGCTAAGAGGATAATTACATTCCACCTCTCTCCTTCCAATTCTCGCTCTGTCTCTTT  
CTTCTCTTCTCTCTCCGTGCGTGGCACTGGTCATGAATTACTGATATATTTATA  
TTTTAACCACTATATATATTGTAAGAAAACACAGATAGT

>Glyma15g37770 | Gm15:43726412-43727411 FORWARD

ATTCGTTGTGACTCTTGATATTGCCAGAAATTATGTATAAATGGTAGTTAATGCGGCTGT  
AATTGTGGTCGATCCAAAATTGTGCGAACCATTTTTAAAACCTTGATTATAATTAAG  
TTTAAAATCTTTGGTTAAATTTTCTCACTCGAAATATTCAACTGTACTTATAGGTACGTC  
GTTCAAGTACATGCCTAATTTTCCACCTTATTAAGTTGTGTGTAAGAAAATCTCCAAA  
AAAGTTAACCTTAAACGTATTGTGTATGTTTTCCATTTAATAAGATTGTCTTTGTAAA  
ACCAACTGTGTTTCCAGATAAAAAAAAAATTATTTAAAATGTGACCAGTAACCACAAAAG  
AATAAGATAAAGAAAGTATATTACACAAAAAAGGAATGATATATGAATTAATAAAGACA  
AATAAATAGAAAAGTAAAATAAGATGGAGGTATATGTTTCGAGGATTGATTCTCCCTTG  
AAAAATTCTGTATGGTTTTGGTCCAAGACTCCTAGTTGTCTTTAAAATTTGTAAGGA  
CAAACAAGTCAATAGGAAATTATAATTCTTGCTAGTATTTCTAGTAAATGGGGTTAAGTG  
CAAAGCACTAAGCAGGTCATGCACATGCATGAATGGTATATATAAAGATTTTTTTCTGTC  
TCTAAACAATGCCCTTTAGGTCTCATGAAAAGGCAAATGGAATGAAAATAGAAGTATTAT  
CAATATTATAGTAAACCAACTCACCCCAACAGTTGCTTATCATTGGCAAAGGGTCAAAC  
AAAATAATAATGAACAAGTCCAATTTTTTAAATTTGGTAAAATCCACCACCTCCTTTGC  
TTGTTGTTCAATTCAAAATCAACCTAGAAGATCCTTGAGATTCTGGATGAAATCTGTGG  
GATATCGCTTTCCAAACTGTCAGATTTCTATGAGGATTATGTATCTTCTTGATCATGAT  
AGGTTCCCATTTAAAATGTCACACTCTCATTCAACTCATT

>Glyma19g44970 | Gm19:50242932-50243931 FORWARD

ATTTTACTAAAAATAATTTTTATTAAAAACTTATTAATATTCTTGATCATATATTTTT  
CATTATAAGATTCAAATCAAATATTTTAAAGAAAATGCAACTTAATATCATGAAGA  
CCACCAACTTGTAGTATCAACAAATTTGTTTAAATAAACTCTTTTTGTACAAAGTCTAA  
CAAATAACGATGGTTAATATCTCACAAAACATGTGGTACAAGCTTCCAAGCTTTTTGGG  
AGTGAGAGAAAGCACACCTTTGTCCATTGTCCAGGGTGGGATGAGTTGTTGGATACTCGC  
GAGTAAGGCTAAATTTGTCATCATCTTTTATATTTTAAATTTAAGTAAATTACACACACC  
GATTAATCATTATTCTGAATTCTAGCCGTGTCGCTCAACATGATTTGATGTCTTTGAA  
CTGAACGTGATTAGTTCATTCCAAGATTTTATAAGTAAATAAATGAGTACATAATCAAGT  
AAGTAATAACATTAATAAAATTCACCTTAGAATACATAAATACAAAAGATCTTAAAACAT  
TTCATATAATTAAGTAGAATAAGCAATTTAAGCCTTTTCTGTTATATCAACTGGGTTTT  
TTTTTTTTTACCAAACAATTTGTCTCATTGAAGAAACCATGGCGGGACCACTAATGAGAT  
TTTGGCACGAAACGATTTGCACATTTGTTTGTCAAGTGGGTAATTTGAACAGAAACAGT  
GAAATACAAGGTGCACAAGGGTTACGTAGATTAGTTAGAAAGTTGCGCGAAAAATAAAAA  
TGCGAAAAAAGAAAACAAATGGTGGCACAAGCAGAGACAAATGTAAAAGCAAGAGAGAA  
ATAATTGAAGTGGTGGTGTGTCAGGAGAAACAACAGAGAATCAGGAACGTTCCACGTGTCA  
GAGTGGCCACCGGAAATCCAAAATGTGGTAGAGCATTACTGACGTGGGCAAAAAAATAT  
CTTTGAGGTTATTATAATTATTTATTGAGTTGCAGGCACGT

>Glyma06g14750 | Gm06:11559595-11560594 REVERSE

ATTTAACTAAGAATGAGAACAAATATTTTGAATTATCCACCAACTTGTTTAAATTAAG  
GTATAAGTTTTTTTTTATATGGAGGAATCAAACCTCAAGTACTAAATGATTTATACCAATT



TATCCAAGTGAGTTAGATTCCTAAATATGTATAAATAAGGTATAATTTCCAATGAACTAT  
TTAAGTCATTTTTATTTTTGTTAGTTTGACCTTAGAGAGTTTTGCATGAAAATATCTATC  
ATATTGTTAATTGTTGTAATAACTAGGGTTAGACAAATATTTGACAAAATCATCTTATA  
CATTAAAGTTTTTTTTTTTTGAAATATTGTATATCAAGTCATTGAATGATGCAATACTTGT  
TTAAGTTGCATGAATTTAATTTAACCCCTTCATCTTATGTAAGATTTAACTTTATTATAG  
CAATTATATAAAAATAAAAAAATTGGACATTCACATACTATTGTGAAAAAGGATAAAAAGAT  
AATTAATCAAAAATGTCCTCTCACCCCGTGATTGGGTGCGCCAAAATAGATAAAAAAAA  
AAACAAAAGAAGATAGAAAGCAAAAATGTGATAAAAAAGTGAGTCTTAAAAGGTCCAGA  
AATAAAAAATTAAAAAAAGTGAAGAGAGAGTGAATTGAGATAAAAAATTTAAATTAATA  
AAGTGTAATAAATATGAATTTTTGTATTCTATCTTATTATTCAATTTGGCTCATTTTTGG  
GTTCTCTTTTTCTACATAGGAGCAAATCCTAAAGGAGATAATTAATATAGCCATGAGGGT  
ATTTAGTTTTTTCGTTTTAAGCATATACTACTATCTTAGGAGAGGAGACTGGCGGTGTGT  
GAGCATCTCACAAACGTGCATGAATGCTGAGATCAGAGTGCAGACAGTGTGCTGAAATC  
TCGTCAAGAGAGACAAAATTTAAGATAGAACTATAAATGAAATGAGAGAGAGAAAGAG  
AGATGAATTGATGATAGATGAGATGAGAGTGTAGGCTTTG

>Glyma08g40330 | Gm08:40029733-40030732 FORWARD

GCATGGACCGGCACGGGATTTGACGGCGCGTTTTGCAAAGCATTGACTTTGGGTCAACC  
AATCCGACCAATCACTGTGTGACATGTCATCTCTTCGCACATCCAAAATGACCAAAA  
TCTCGTCAATCACACGCCATATATCATTCTCATCACAAAATATTATAAAAAGTTTTCGG  
TGATACGGAGAGATCATTGTTTCAAGTGGATTTGAGAATCTCAGCTCCATGTCTGAACAT  
TAAAAAATTAATAACAAGAAGAATAGGGACAGTGGAGATTTGCTTTTGCAAAAGGGACT  
TTATATTATAGAAAGATATTAATTGATATATGGTATAGAAAATTTTTATTTCATAATTCA  
ATTATTTTTAAAATAAGATTTTTTTTTAAAAAAAATTTAATTTCTTTAATTATTGTTAA  
TTTATTTTAAACATAATATATATAGTTAATTATTTTCAACAAAAAACTATATTGATGAT  
TACGATATATTTTTTTAAGTTTTTAATCATTATGAATTATGTTTTACCATAAATTGATT  
AAAAAGTATTCTTAAATATGTAATTATTATAAAAATTCATAAATTTATATTATAAAAA  
TCTCTTATATTTAGAAAAAAATTTCTTACAATTTTGGTATCTATAAGTAAACGGTCATTC  
CCAAAATGAAAATGAAAAGTAAAATTAAGTAATAACTTCGTTTAAAATCTTAATAAA  
GGCATATTTATGATTTATAACATCAAATATTACACTTTTAGTAAACATTTTCCCTCTCA  
ATTTTTCAATTGTTAATTTAACTTTTTATGATCTTTTTCTAACAAGTATGAAAATTTT  
TATTTCCCTTGTCAAAGTTTCCATAAATGTGTTTCAAAAAAGTGAAAAGAAAATGAC  
GACGTGACATGATAATTGATAGATTGATAGAAGAACATATCATGTTACATTATTATATTA  
CAATAAGCTGTATTTAAGATCTAAGCACCCAAGTTACGTT

>Glyma13g03560 | Gm13:3559876-3560875 FORWARD

ATAGCTATCAGAGTTTGACTTTTCCCTAACATACTAGAAGGGTCTAGCATGTGAACACAC  
TACACAATATCAATAATTTCTTCATGTTTACATCATCGTGATAAGAAAGAAATCATGTTG  
AATAAAAGACCACCCATGCATAGAGAAATACTAAGCTAAAGTATCTGTTAGTTGGATCAT  
AGTCTTCCCAACCCATGCATGCCTTAAGATTTTTTTTTTTTTAAAAAATGCATGTGATAG  
CAGTGAGCATTATAAATGGAATTTAAAGTGAATAAGAAATAATAAAGTTAAGACAAGG  
AAGAGACGAATCTACTTACTTCTTCTTCTCTTTTTGATAAGTATTTAATGCATTAT  
ATATTTCCAATATATTAATAACATTGATATTTTCTAATACTATATTTTTAACTAGTAAA  
AATATTTATAAAAAAAAAGTTGCAGAAAGATATACTATTACTACAATAATTTATCAAAA  
AAATTACTCATAATAAATATTGAATTTGTTATAACTATTACTTCTAAAACTTATTTTTAT  
CAATAACAATCAAATCTTCTTATTGAACACAAATCCAATCAATTAATAACATTTGAGAA  
GAAAAGAAAAGCACTTTAACGAGGTAATTAATAAGAAAGAAGGGTTGCCTTAATTTTCAA  
AGTCTTTGACAAATATAGTCCATTAATCCAATCCACACCGAAAATCAACCTTTTTCCAC  
CATGATGATGATCGAATGGGAACAAAGATGTTGGCTTTTTTCTTCTTCCCCTAGCAATC  
AAATAAAATCCAATTGAAAGTAAAAGAGAAAGAAAGTTAGGAGTGTAGTTGAATTAAT  
AAGGTAGAGAATATCTAGGGTCAAAGATCATAGCATGAAGCACACACAAGTTTGTTTCT  
GTGCCTCAACAGTTTTTCTTCTCTCACGCACCCACTTTTATAGAAAAAAGCTAAAGACA  
GTTACATGCCACCTCTCATTCTCATTACCATGTTTCTCT

>Glyma17g16360 | Gm17:13036436-13037435 FORWARD

AGACTTACTTGTGTTGTTGTCGAAACTGCTGATTGCAACTGTTTCAAGTGGTCCAGGAAGC  
ACCACCTCCAAAGCCAGCACTTAAAACCTTTCTTCTTCCGTCTCTTCTTTACCC  
TTCTGTTTTTATTAACAATGCAATAAGAGGAGAAAGAAAGAACACAAGTTTAATTAGCAA  
TGAAATTCAAGAAGCATTTTCTTTTATGCCAAGGTAGTGAAAATTGTTTACACGGAACA

TTTTTTTTCTTAATGTGTTTTTTTTGTTTATTATGTGCATGCTCTCTCTCTCTCTCT  
TGGATCAAGTTC AAGTGTTCATCTTTTCTGCTTCTTTGAATTTTGTACTTTTTGGATTAA  
AATATCTGCATGCATGTCTACCCTTTT GAGCCTTCTGCTTGT TTTTCTGGATTCATGGTTA  
TGAATTGCTTGCCTGACCCGTTTTTGT TGTAAAGTTTTCTACTTTTGT TTTTCCACTAT  
TCATGGTAGCTGAGCCTTTTCTTTTATCTTCATGAGATCTCAATTACTGGGATTGGAA  
AATTGTCTGTTTGT TGT TTTTGTGAAAGTGGCATCAGCCAATGAGATCTTTGGAACACAAA  
AGGGGAGGCTTTT GATTCTGTTTGTGTACAAAATGCTTCCAGAAAAATTGGTGGGAATA  
TATGTTTTTGTGATTACCAGCTGTTTCATTGGTGATCAAAGGGCATGGCAGTTTTGAT  
AATTTGATCTGAACCTTGT TTTGGGAGTTGATCTTTAGATGGCATGCCAGTGTCTGCAT  
TATGTGTTAGTTATTTGGGCCATTTAAACAAATTTAAGCATGCAATGAATGGAGTTTGT  
TATGTTTTGTTTTTAGTGT TTAATCTCACGCTGAATTCTAGCTTACTGAATCAAGCT  
TGTGATCTCATGGTTGTGCAGAAGGAATTAGATGCTGATAAGTGGTATTGATCGATCTGT  
TACTTTCTGTGGGAGACTGAGAAACGATGCCAAGCCAGCT

>Glyma12g07860 | Gm12:5497198-5498197 FORWARD

AATTGATTTATTTCCCTAGAAGATTGAAATAAAAATGGCTCTTCCATTTTTATACCTGT  
CCTTCAGTGCATCTGGTGT TATATAAGGTGGATAAAAATATCTGGGAAAAAGAAAGAAAA  
ACTAAGAAGACGATGTTTTAGATTATAACTTTGGAGTTTTTGTGTTTCATGTTGTCTTAT  
TATATAAGCCTCTAACTATTCGAAC TATTCGAATTTCTGAGGTCTGCTGATGTCTCCATG  
TAAAGTAATCTTGTGAAGAGTTTCTCATGTATGCATGTCTAATCAGATTTCTGCCGAGT  
TTCTGTAAGGATGGTAAGTGAGTTTAGTTATTATATTCATTTTCTCAGGATATTGGTATG  
AATGGAAAGTTATACCTAGTGCTGAGACAGAAGCTTTGAGGGTTCTTTGATGCAGGAACA  
GGTTGTCGTTCCATTTCTTTAAATTTGCTATGAAATTTTTGTTTTGAGATTTTCATTTCT  
TGTCGGGGGGCTGGAGTTTGGAGGTATGGATCTATTTTTCTATCTTAACTTTTTCAA  
TTACTACTATGTAATTATTATCAAGTCTATTTTTGTTATGTTTAGTCTGTTAACAATTAC  
CATAAGCAATTACTGATTTTATTCCTTATGATATTGTGTATATGTAATTTGTTGGGCC  
CCTTGGGTGGAGTACCCTCAGGTATAGGGTATTTGGTTTTTCTGAATTATGATGGAAAA  
AGCGCTGACTTGACTGATGGATAGGGTGTGTTTGCAGAAATTGATAGTTCAAGTGCTTG  
GGATGTGGAGAATCCATGATTCACTTGGGAGGATATCATGTTCCGTGTGTTAATTCCTCA  
CAATGTTTTTGCAGTGTGTTGATATAGGCTGGTCCGATGAACAATAATGTTGGGAAAGG  
GAAAAAGGTTTGGCAGAACAAAATCATATGTTTTTGCAGAAAAGAGTCTCGAAAATGG  
AGTAGTTAATGGAGGGGTAGCCTCTGGATCATCAACTGAA

>Glyma13g22320 | Gm13:25866825-25867824 REVERSE

GTTAGAAAATAATGGAAC TTTAACTGATCATTACAGAAGGAATTAATTACTTATAGTTCT  
TAAGGAGTATATCAAAACACAACGCAGTTTTCTTTCTTCCCTCACCAGAAGATAAAGTGAT  
AGTCCTCTCCTCTTGAGACATATTGTTGAAGAAGACCACACACCATCCTTTTTAGTACA  
GGAGATAGTTGATTGCATAGATATTATATTC AATCAACTATTGTGAAATCGAAAATTTA  
TCCAAATTTACAAATCCTTGATATTTAACGCCATTTAAATTTAGAACTTTTAGTATTTT  
GTTTGAGTATTGAAATCTAGAATTTTGATTGAAGATTAATAAATAAAGTTTGTCCAACATA  
TGATTATTGTGTAATAAAATCCACCCACTTATGCTTGT TTTGACCTTAATAAATA  
AAAAAAAATAACTTTTTTCTTCTCATCATAGTATTGATAAAAAATAATTCTATCAAGAA  
TCATAAATATATACAAAATATATAAAATGAATTTTTTCTCTTAATACAATGTATTTTCAT  
ATTTATTTAAAATTAAGATTA AAACTCTCTCAATATTAAGAGACATGAGTTATTACTATC  
ACTTATATTTATCCTTTTCCGGTGAACATCATT TTTGTATGTTGAGTATAGACCTCATT  
TGTGCCTTATGAAGTAAAAAAAAGAGAGAGAAAAGAAAATAATAAATATAAATAGGTGAT  
GTATTAATTA AAAAAGGAAATAAATGGAAAAG AATGCGGTTTAAATGAATATAATTACCTA  
CCCAAATTATGTCGTTTTCTTAACATATTTTTCACACGAAAATATCATCATATCAATCAA  
TCTCGTAGTCGTAGGTGGTTTTGTTGAATATAAAAAGGGTAAGCCAGGTGCATTATTGTA  
TTCTGCATTCACACAGGCAATTAACAAATAATTAAAGACAAAGACTAACTCTGTTGTGTT  
GGAAGAAAAAAGTGAACGACAGAGAGAAGAGCAATGCCAT

>Glyma13g26770 | Gm13:29987046-29988045 FORWARD

TACGAAATTGCGTAAACTATTCTTTAAAACCTTGATTATAATTAAGTTTACAATCTTTG  
GTTAAATTTTCTCACTCGAAATATTCAACTGTTCTTATAGGTACGTCGGTTCAAGTACAT  
GCCTAGTTTTCCACCTCATTTAAGTTTTATGAGTAAAGAAAATGTCCAAAAAAGTTAAC  
CTGATCGTATTGTGATTCCATTTAAA AAGATTTTAAAGTACGTATGACGAGTAA  
CCACAAAAGAGTAAGATATTTAAAGTATTACACAAACAAGGAATGATATATGAATTTAA  
ACAAGACAAATATTATAGAAAAGTAAAATAAGATTGAGTTATGTTTCGAGGATTGTTT

TCCCTTGAAAAATAATGTATGGTTTTGGTCCAAGGTTCCAAATTGTCCTTTAAAATTTGT  
AAAAGCACAAACAAGTCAATAGGAAATTATAATACTAGCTAGTATTTCTAGTAAATGGGG  
TTAAGTGCAAATCACTAAGCAAGTCATGCACATGCATGAATGGTATAAAGATTTTTTTAT  
TTTTATTTTGTCTCTAAACAATGCCATTTAGGTCTTATGAAAAGGCAAATGGAATGAAA  
ATAGAAGTATTAATTATTATAACAAACCAACTCACCCCAACAGTTGCTTATCATTGACAA  
AAGGGTCAAACAAAATAATAATGAACAAGTCTAGTTTTTTAAATTTGGTAAAATTCACC  
ACCTCCTTTGCTTCTTGTTCAATTCAAAAATCAACCTAGAAGATCCTTGAGATTCTTGAT  
GAAATCTGTGGGATACACTTTCCAACTGTCAGATTTCTATGAGGATTATGTATCTTC  
TTGACCATGATGGGTTCCCATTTAAAATGTCACACTCTCATTCCATCACATTACATTACA  
TTATTATTCATCTCTATTCCCTCTTCTTGTTCTATTCTTTTCATCCAATTCTCTCCTTCTG  
TTGTGGCTAGCTAGCACACAATTATATCTTCCAAGTTATT

>Glyma18g17330 | Gm18:18479551-18480550 REVERSE

AAAAAATAACAAGAAAAAGGGACAGTGAAGATTTTGTGATTTCTGAGAGATTTGCTTT  
TGCGAAAGGGACTTTATATCATAGAGAGATATTAGCTGATATATGGTATAGAAAATCTTC  
CATTTTATATATAAAAAAGAAAATCTTCCATTCCATAAATTTAATTTTTTTTTAAAAA  
TAAAAATTTAGGAAATAAGAATTTATAAGAAAATTTATAAATTGTTTAATTATTTTTAAT  
TTCATTTAAAGAATAACATAAAAAATAAATATATTAATTATTACAAGATAATTTTTATTTT  
TAAGAATTTAATTTTCATGCGCTATGTTTTTACCATAAATCAATTAGAAAATAATCTTAG  
ATATAACATTTGAAGTAATAATTATAAAGTTAACAATTTTATCATAAATAACAATTTAT  
ATTAGATTATTGTTTAAAAACATTTTATACCATCAGTGGATTTCAAATTTAAGTTTTATA  
CTAATAATGAGAAAGATAAGATTTTATTCTTAATATTCACAAATTTATATGGAAAAAAGA  
TCAGTCACTAATATGATAAAAAGTTTTAGATCTTATTTTCATCTCAATTTATTTTTACAAT  
AATTATTTTAAAGTAACATTGTAATTTGTGATTATACAAGAATGTAAAATTGTTATTAGT  
ACATAGAACTCAATTAATATTATAAGAATCTCTTATATTTAGAAAATACTTTTACAAT  
TATTTTTTGAAAAATTAACACTGTCCTTTTCCAAAAACTGAAAAATTAAGTTATGGTAA  
AAAAATAATAAATAAATTTGTTAACATCTTTATAAAGTATATTTATGATTTATAATAT  
TAAACATTACAATTTTAGATAGCNNNNNNNNNNNNNNNNNNNNNNNNNNNNNNNNNNNNN  
NNNNNNNNNNNNNNNNNNNNNNNNNNNNNNNNNNNNNNNNNNNNNNNNNNNNNNNNNNNN  
NNNCTCTCTCTGTTCACTTTTTCTATCCTCGAAGCAAGAA

>Glyma11g37480 | Gm11:38572962-38573961 REVERSE

TGAGCGGAATTGAGGTGCAAACATTAATAATAGAAAGAACAGGTAAACCACAAGGCTTTT  
TAGTCCTTTAGCCTCAATTGAAAAATTACTATTCTGATACACCAAATAGCACTCTACAT  
AGATAACAGTCCCCTAAAACCCTTTTTAAAAACAAAACGATAACACCATACAAGCCAAA  
GCATATAAAATATACTTCAAATAAGCAAAGTGCCACTTACTGGCTTTTAGAAATGCA  
TCTGCACCGCAGCACTACACAACGCAGGTTCCAGAAGTATAGTAGAAAGTAGAAGCACTG  
TTTGTTCCTAGGTTATCTCAGTATAATAGTACATAATAATAGCTTTTGCATATTTTG  
ACAAGAAGCCTCACTCACTTTCCCTGGGATGCCTGAACAATCTTCCCACTCAGTTCAGTT  
CACTTTTATATTAATGTTTTTGGTGAAATGGTATTCTACAAGTTTTGATTATATTTAAA  
TTGATTATCAGATTAATATTTAATCTCAACATAATCAATTTAAAAGTTTTATTATTCTC  
TCTAAAAGTGTATTCTGCATATATCAAATCAAGTCATCATAAATTTAATATAGTTTGTG  
AATCGAGTTAGGTTATATATTTTCAATTTAAATTAAGCCGCCAACGTGTTTCGGCATT  
AAACTTAAAAAAACTGCATCACTGTTCTAGTTCCATAATACTAATGTAATGCAATTC  
TATAACAAGTAGTATAGAAGTGAATTGTTGTAGCTAGGTAGGACCAAACAAAACCAAAGG  
GATATACTAACGTACGCCACAGGGACCGTTAGCTGTGCGGCGCCAATATTCGTTGGTG  
TTGGTGCTCTCTCTCTCTCTCTCTCTCTCTCTCTCTCTCTCTCTCTCTCTCTCTCTCT  
TATTATAACCCCCACAAACAACTCAACCTTTTTTTGAACTCACTAACACAAGCACACTG  
ATCCTAGCTTGGCCCTCTATTCTGTGTCTCTCTCTCTCTCTCTCTCTCTCTCTCTCTCT

>Glyma05g06070 | Gm05:5629783-5630782 FORWARD

TTAATTCTCTTATTTTATTTAATTAATTTTTGTTTCATCTTATTTGATATTTGATTTTC  
CTCTTTTACAAATAAAAAAATCGGTCCATTAGTCAATTTTAGGACGTTGAATGTTAATA  
AGAAAAATATTATCCGTTAATTGCTAACATAATACTATAATATTAATTTTAAATTTAT  
TAATTTAATAAGAATTTAATTAATAATAATATCATGTGCCACATCATCAATTGAGATC  
AACATTCTAAAAATTGATGGTTGAATCAAATGTTTTTATTTGTTTTATTGGAGAACCAA  
AATTGAGAATGCAATAAATAAAGAGATCAAATTTATTTTTAATTTTAAAAACTCAAAG  
CTTCTTATTTAATAATAATTATTCCAATTTATATGTAACACAATTATTTAATAAAATTA  
ATAAATATTTCTTTTTTAAAAATAACCTAATAAAAACGTTAATAACTTAACTCTTTGT

GCTGCCTAGGTCCACCTGAATTGATGAAATATTTACATTACCTTAGTCGAAGATTATTTCC  
ATCGGATAATATTAATGCACGATGATTGGGCACCCAACAACCTTTAAAAGCATTAAATAAAC  
CATTTTTTTTAGAGAAATAAATGCATAATAATTATTATGATAAAAAGAAGTCCATTAATG  
GCACTGATGAGGAAAAGACACGTTATACAGTTAAAACCTCTCTAAATCTCTAATACCAAT  
GTCAATAAGATACTATTCCCTCTTAAACTTTTTTACTATAATGAGTAGTTGTTGAGCGTG  
TTTTCTGCAACCATTTTCTTCTTCTCGGTTGATTGATTGGTGATGTTGCTGGTGCC  
CCAGAAGAAGGGGTAGTGTGGAATATTATTAAGCTTTGAACTTTGAAGTTGTGGCAGAA  
ATCATTGACCCTTTTTGAGAGACTTACTTACTTGTGGTCCAAAACCTGCTGATGGCAACTG  
TTCAGTGGTCACAGGAAGCACCTCCAAAGCCAGCATTTA

>Glyma19g35480 | Gm19:43067727-43068726 FORWARD

ATAAAGATGGGAATCAACCCATTTTAGGTAAAAGAATACAGTACTAGAGATATTGAACAA  
AATCCTACAAGATACTTTTCTGAATCCAATACTGATGCTTATACCACATGTTCTTTCTTT  
CTCTTCATTATGCTTTAGATCAATGACTTCTGGAACCACGTGGAGGGAGTATATATAGCT  
CAACTTGCTTGCTCACTTATCCATCTATCACTCTGGTGACTGTTGGAAAAGAGTTATCC  
ATTCAGGTTAGTCTCAAATTAACATTAGTTGTTATAAGTGGGTCTACCAGATTTTAGAC  
CATACTACATACTTTACTGATTCACACCTGAATTATTTTTATATGTATTTATTTTTCA  
AATTGAGTAATGATACATATTTGTTACAATAAAGCATCTCATTACATTTTTTTTTCTAT  
TTCTTTTTTTTACGTCATATTATATGAGCACTAGTCATGAGGTGTCTATATAGATAATT  
TTTTTAAAAAATTTATATTGTTGTGTTTGAATACAATTTTGAATGCACGTATAACTC  
CTCTCTCTATGTTTCTCAGAATCAGTAAATTGATGCTTCTGCGTAAACAACCTAATAAAT  
TGATGCTTCTACGTAATCTACGTGCTTCCAAACATCAACGATTATGAATCAAATACTGTA  
ATTCAAGATTGCTTTAGTATTGAGTAATGATAATTTATACATTTTATTATCTTACAACCT  
ATCTTTCACCCTATTTTTTTTTCTTATTTCTCTACCTTTTTCGTTATATTACATATTATAT  
CTATCATTTTCTCTATACTTTTGTTTTTATCTCTATCTCATCCTCCCTATGCTCCAATCC  
ACCCAAAATAGGGTGGAGGTTAACATTTCCGTTTACTTCCATATATATTTTCATGAAA  
CATTATCTTTGGATACACATATATCTAATATATTTCCAAAAGAACTGTGCTACAGGGAG  
AAGACAAAAGGAAAAGATTGGTGAAGAACAATTAAGTC

>Glyma04g33110 | Gm04:38595069-38596068 REVERSE

AAGTTAGGGACGGAATATACATTCTCATGTTTGTACAAGTTTTTGAAAATATTCCCA  
TGTATTATTGATTCCATAAGAATGCTATGATTTTATTTTTATCATGTTTTCTTACATTTA  
TATTTCCATCAGGAGGGAGTGGGAAAGTAATATTTCCACAAAATATGAAAATTTATTAT  
CTAATACACGTGTAATTTTCTTTTCTATTTAACTTATTTTAAATTTTAAAACTATTCCC  
ACCTTTCTCGTGATAAAGTTTTCTGAGAAATTTATTAACAAAACATTTTCAAGAAAA  
CTGTTTATCGAGAATCTTATTTTCTTAAACAGATATAAACATTTGAAATTAAGATTCT  
TAAAAACCTTGAATTTATCTCCTACCAATGCCTCCTAAAAGTGATAACCGAGAAATTTT  
CTGCGAGAATAATCGATCAAATTTAAATTAATTAAGACTAAAAACAAAATAAAAAAT  
AGGAAAAAAAACCTAAACCCAAATTTAATTAAGATATTATTCATGAAAAGTGATGGGAT  
ATTTTAGACTATACATTACATTGGTTCCTCTTCAATTTGGTGGGAATGAGAAAGATCTTCA  
GGTGACGTGGCCGGCTCCCTATCTATCCCACTATCCAGACCACCCACTCCCTCTCTCC  
TTTTCTATTGCATTTTTCGACCCTTCTTCCACTGCTCCCTCTTTTCTACGCCAGCC  
CCGTGTGCACTGCGCCCCCAATCCCCGCGCACGTTAGCTCACCCCTTCTTTCTTAAT  
TCCAATTTAGGCACCGCTTTTTCGACGCCCCCAACCAACAAAACAAAATAAGCCGC  
GGTTTCCTTACCATGCTTCGCTTCGCCGACCTCTGACTCAATAATAACAATCAGCCACCA  
TCTCCTTTTCCCTTTAGTATCTGCTAACGTGCGCCGTCTCAACGGTGTGTTTGATCTCCC  
TCAACGATGCTGTTTTATCGGAATGAGCAAGTCGAGGAAT

>Glyma06g14150 | Gm06:11154930-11155929 FORWARD

AAACTACTAGTACCATTTTTTTTTATAAGCAAAGTGATATATTTATTTGAACCAACTCA  
AAGCACAAGTTGTGCCTTGAGCCAACACGAGCATATTACACAATAGGTACTGATACCAAT  
TAAGTTATCTATAAACTAAGCTATATATGCTTTTCAATTAATAAAATTTATTGTAAGAAC  
TCAATAATATATAAAATTAATAAACAAGAAATAGAGGTCTTTGGTAGTCAAGAAATGGA  
GTTAGAATAAAAAAATAAATCGAAGACTAAAAGGAGAAGAAAAGAAATGCAGAAAGA  
CAAATCACCGAAAACAAAATACAGTAGGCTTCTAGAGATGGGAATAAGTGTCAAACATT  
TAAAAGTAGGGTAGTTTGGGAATTTAGAGAGAGAAAATGAAATGGTTAATAATTGGATAA  
GAAGAAGACTCTGTAATGAGAGGCAATAAGATTTAGAAAAGTGTCTTGGGTTGATTTGA  
ACGTCATCCCATATCTAAGCTTAGGGACTAGGGTGGTAAATGAACATGCAGGCCACTTCA  
CGCATTGAATCGTGGACTTCTCCAACGGAGGAGCGAGTATCCAGCACGAAAGACAGTG

GGCGCGTGAGGAGCTCCCCTCCTCGTAGATAGCGTTTGACAACCTTCAAAGCCACAAAACG  
AGACTCTCCCCTAGGACAGAGCCACGTGTCTCGGTGTCGTCCATGTGATACATGGGCAGC  
CTCAAAGCACTCAAAAATATCTTTGAGAGAGTGGGTTTAAATTAATATCTTTTCTGCCGG  
CGGGGCCCACTCAGCGGCAATTGTCCACACATAAAATATCCACATGAAATGAAATTCGG  
ATATTTTTTGGAAAGAAGCGAAGTTAATAAGAACCAAAGAAATAAATAAATAAAAAAGCG  
GGTGA AAAAATATCCACCACCAAACCCACCCACGAGAACCCAATGGCTTTTTGGCTTTAG  
ATCTTTGGTTCGAAAACCAGATCTCATTGCTGACGTGGATC

>Glyma17g33230 | Gm17:36889310-36890309 FORWARD

TAAATAACCTAACCCCAATTGTTCCGATCGATTTGGATCAATTCGGGTTTCGCGGGTAACT  
CATACCCGTGAACAGTCCTAATTCTAAGGAAAAAAAAAAGATCAAATTTAAATGGATAAT  
CTCTTGACCTGAACCAAACAAACCTTTTGTGAATGAGTTAAGATGGGTTGGGTTTCAA  
AAAAATTGTGAAAATTAACCAACTAAATCATTCAAATTTGATTAGGATAAGTCTTAGA  
ATTTGGCTAAACAGGCCCGAATCGACTTACAAACGTTCCAATGCTTAACAAAAATTGTA  
AAATAAACTACGGTAATATTCCGGGTGATTTCTTAAAAAAATTAATGTTTTTTAAAAGTA  
AAGGATTCAATGTGTTTTTGAATAATAAGGGATATATGGTGAATATGTTTCTTGACAA  
CAAGATAATGCTATGATGTATCTCAAATAATTAGGGAAAGTTGGGTTTAGGTAATAAAG  
GACAGATATGATGAGAAATTAGGAAAAAGATAAAGATACTCTGTAATTTGGTGTCTAAAT  
TCTAAAAAGGAAAGAATCATCATATGTTTCCGTTTTTATGAGCGCGTGCACACAACGCGT  
CAAATTTTCCAGAAAATTTGAATTGAATTGCCGATTTTCTCGTTCTTACGAGAAAGGA  
AGGTCCATCATCACGAACCTCCATAATTATAATTCGGTCAAATCTCCTCCTTGTTTAA  
TCAAACCTTCACTGTACTCACACCACCGCACATTTTTAGTTCAAGATTCTGTATCTTTCT  
CATTCAACTTTGTCACACAACACATAAACTCAAATAAAAAACAATTGTTTTTTTAAAT  
TGTTCTCTCTTTCTTTCCCTTCATCACTCTACTTTTTCCCTTGTC AACGATATTCTTC  
CTTAAAAATCTTCTTTTCTTTTCTCTTTCTTTCTTTCCGGGGTCTGTGTTTCATAGATT  
CTGTTCTGGGGTATTGGCTTCAAGACCCCTTTGCAAGAAA

>Glyma16g02050 | Gm16:1590480-1591479 REVERSE

AAGCTGCTTGCCAGAACTGAGCAAAGAAGCAAGTAAAGGGCGGTTTGGAAATTGTTACT  
ATTATTTTCTCTTTACATGTGTTGAGGATGATGATGAAGTCAATTCATTCACTCTGTT  
TTCTTCTTCTTCTTCTTGTGGCCGATTAGGGTTATTATTCTTTCTGGCTGTGGAACGAA  
CCATGCTGTTGTTTCGAGAATGGATGAGTTGAACTGCGCGATGACGACGACGACGACGGAG  
AATAGCAATGCGGAGCTGGTTCAATGGGAGAGGTTGAGGTTTTGGTGGGAAGATATTTCT  
AACTATTTTACGGCTGTGGTTGTGGGCGAAAGCTGCTTGCCAGAACTGAGCAAAGAAG  
CAAGTAAAGGGCGGTTTGGAAATTGTTACTATTATTTCTCTTACATGTGTTGAGGAT  
GATGATGAAGTCAATTTCACTCTGTTTTCTTCTTCTTCTTCTTGTGGCCGATTAG  
GGTATTATTCTTTCTGGCTGTGGAACGAACCATGCTGTTGTTTCGAGAATGGATGAGTTG  
AACTGCGCGATGACGACGACGACGACGAGAAATAGCAATGCGGAGCTGGTTCAATGGGA  
GAGGTTGAGTTTTTGGTGGGAAGATATTTCTAACTATTTTACGGCTGTGGTTGTGGGCGA  
AAGCTGCTTGCCAGAACTGAGCAAAGAAGCAAGTAAAGGGCGGTTTGGAAATTGTTACT  
ATTATTTTCTCTTACATGTGTTGAGGATGATGATGAAGTCAATTCATTCACTCTGTT  
TTCTTCTTCTTCTTCTTGTGGCCGATTAGGGTTATTATTCTTTCTGGCTGTGGAACGAA  
CCATGCTGTTGTTTCGAGAATGGATGAGTTGAACTGCGCGATGACGACGACGACGAGAAAT  
AGCAATGCGGAGCTGGTTCAATGGGAGAGGTTGAGGTTTTGGTGGGAAGATATTTCTAAC  
TATTTTACGGCTGTGGTTGTGGGCGAAAGCTGCTTGCCA

Promoter regions 1500bp

>Glyma17g33670 | Gm17:37588130-37589629 FORWARD

TGGTGTCAATAATAAACTTTAGTAAAAAATAGTTGCATGGTACTAATACCAATAGC  
TCTGGCTCAATGCTGATGTTTGCAGAGGAAAGAGAAGTGTGAAGTGAACAATGAAGGTAA  
CGTTGTTGCCTCATAATATGACACAAGAAAGACAATTAATAAGGAAGATAAAAAATAA  
ATAATGGGCAAGAACATTTCTCTATCATATTTGACCTCCAATGCACATGGCTGCTTGGG  
TTTCTGTTCTATTAGTTTTTGGTTTTTTTAAAAGTTTTTGCCTTTACCTCACAAAGTTTA  
CAATCACACCCTGTCCTCTCTCTCTCTCTCTCTCTAGTCATTGGCTACATGTATGTT  
TCATCTGTGTCATTGAATGCTTTTACTCCATAGTTGAAGAGATTCCTCAGATCTACAGG  
GAAAGAATTTTGGACATTGTCAGCCTCAATTCTTCATCTTTCTGGGATCTTTTTTGGTCA  
CTCACTTTTATTCCATCAATCCAGAAAAGTTGGACTTCTTCAACAATTCATTGTCATGAC  
ATGATTCACAATCATTATAAAGTTGGTTTGCATTAATGTATTAGTTTTTAATTTGAGG  
GTGCCAATTTAAATCCTTATGCCTTTTCTTTTGGAGTTCTTCTTATTTTTTCTTCTGT  
TGGGGTGGTTGTTGTTGCTGTTGCTGATGCTAATGGTGGATCTTGATTTTGTATTGCA  
ATTGAGATCAATCATTCAATCTTCTGTATTGTGAAAATGTGTAATAGTTTTGTTTT  
TGCAATTTGCTAGTGTGCTGAAGTTTATTTGTTTTTGTGTGATTGAGCTTTTAAAAGT  
CTCAGGTGTGCTTTTTTTTTTCACTTCTTTTCTCGTTATTCTGGATGTCCAGTGTGAGTT  
CTATTCAACTTTTTGTTTTCAAATTTTCCAATATATTTTTTAAAATAGTTAATGCACC  
AATTCATGATTTCTTAAACAGTTAACTTCTATTCAAGTGTGATTTCTCCGGGGTCTGA  
TGTCACATATATTTTCTTCAACTGTTGTCTTAAATCATGGTTTTGTCACATTCCATATT  
TCAATTTCTTAGCATGACATAATGACATCAAATCAGTGACCATCTTGTTTCGTCTCTTTT  
AACTTTTTCTTATTCTTCTATTCTTGGTTCGGTTAAAGTCAAGTTCCTGATCTTGGTGGT  
TACTTTCACTGTACTACTTTTTGTTTTGGTACATTATTTCTTTTATTTCAATTCCACCTTT  
CCTTAATAGTAATTTAATTCTATTATTATATCTGTTCCAATTTCTTACAAGAGACTCA  
TCTTGGCCTAACAGATTGCAGCTGGCACTAGTGCTCTGGCTTATAGATAAAGCCAATAAT  
TTAAAACATTGACCAGTGCTTCTTGTGATGCAAGTGCTAATGGATTGAAGGAAGAGCTAG  
TTGAAACCCATAAGTTGAATATTGTGGAAAAGAAATTTGGATGCTATCAGTTTTCTTTCA

>Glyma03g37760 | Gm03:44272843-44274342 FORWARD

TTTTATCCGCACTTCTTTTTTTTCTTATTAACCATGGTGCTAACATCAACTAGGGGGA  
GAAATAAATTATGCAACACATAAATTGTTAGTTTATTTAATCATTTTTATGTTTTTTTTT  
TCTCACCAAGAATATGTTTTGACCAACCAATAATTAGAGACTAATTTTTTGTATTCACAT  
TGTCAGGGATCAAACCTCTAATACGCTTAAAAAATTGCTATTTATCTACTGTGTTTTTGT  
AGAGGATTTATCAACTCTATTAACCTTATTGGGTTGTGATTTTTATGCTAATGTAGTAA  
AAATAACCTCAGATTAAGAATATGTTTTAAAAGAATTCATTTTAATAATTTATAAAA  
TTTGCACCAACTCGGATTCTAATTTGTTTCAATCCAATTTTTGTCAATTTTTCTGCAT  
ATGGTTGTCTCAATTTTTGGTGTCTGCTTGTAAATATGAAGAAGAACCAGATTTTTAAC  
ATTTTGGTTATCCTTTTTCGGGAATAAGTTTCAATTCTAAGGTCTCTTTTTGAAAGCTAT  
CTTAACTAAGGTTCTACTTGGTGTATATAGAGAACCATTACTTACTAATTCATAAGAGC  
AACAAACACTCTTACCAGTATGACAATTAGCAAATTCACCTTGAATATGGAT  
ATTTTTAAGACGGTGAAGAATTTTTATATTGAATTTTTCAATTTTTTGGTACATGGAAAT  
GAGAATATTTATTTAATTTTTTTTTATTTATAGTATTCACAAATTTAGCAAGATTTCTT  
ACTTTTTTTAAGAGAGTAAAATTTTACTTATACAATAGAAAGATATACAAAAGAAAAC  
CATTCAAGTTAGACTTCTGAATCAAGTACAGGTAGCATCAGTTATTTATGTTTATTTTTCT  
TAACATACACTTATTATTTATCAGTCTTAAACATGTGTTACAGGCATATTCTGCGTTGTT  
AGTTCTTCTCTCATTGACATCATGCTGGTATGCCATGGTGTGATGCACATAGAGCACCACGT  
GATTTTGAATTCAGAATATGTTCTCTCTCAATTCCAATCCGAAATTGAGCATTCCGGCCGG  
ACTGATACACCCTATAAATTCGTCCTCAACCAATTTTGCAAAATTTTGGAGTTCAACTCT  
CCAAGATACTAACCTTTTCTTCTGATATCAAGACCAAGGTTATTAATAACATTACTTG  
TTCTTCTCACGTAGAAGAATTATTAGATGGGTGAGAATTAGAATTATGGTTTTCAGTCT  
ATCTCTATGTGATACATAAATTTTTATTTAATTTATGAAAGAGTTAATAATTTATTA  
CACGAGGATTGATTGAGACTAAATCATTCCAACCATGTAATAAATTTTTACATGAGAAAT  
ATTACATTTGAGTTTTGTATGTAACTTTTTATTTGTTCTTGTGTTTGGACTTTGCAGGTGG  
CTCCGTTATTATTTAAGCATTGAGACGGTTCCTAACTTAGCCCAAATTTACATACATAG

>Glyma06g06240 | Gm06:4468142-4469641 FORWARD

TTATTAATTTAATTTCTATACTGATAATTTTATTATTTATTTTTCACTTATCTAAAAGAT  
TTTTACACACACTAGAAATTGAATATAAATTTATTCGGTTAAATAGGTGTTTTAACTCAA

ATGAATGCAACGAGATCTTGGACCGCTACACCAACCCTTTGAGTTTCATATTTTTATTGT  
TCAAAATCTGATTTAAAATATTTAAATAATTAGAGGGCTTGAGAAATGTAACACGCATAT  
GTATATACTTTAAATGGACAAAAACAATTCTAGTGACAGTCAAAGCGTTCAAATAGTGA  
GTAGGATTCATAAAATTTTGAATTCTCAATATTTTAAATTACTTCCTTCGATTCATATT  
AAGGTATGATTAACAAATTTGTTAAAATGAAAAATAGTTAATTTAATTGAAAATATTA  
ATTTGTCCTCAACTATTATTTTAAACTATTCTAAAAAACTTTAAAAACATTAATGAAT  
TATGATTTTTTAACTGTCACATTATTTTAGAACTGACTTTAATTTAAAATATTTTTGAAA  
AAAAAATAATAAAGGAAAAATTATGTTTAACTTATAAAAAAAATCAAGATATACTTT  
TAATTTAAAACCTTATTATAAGGATACGAGGCAGAAATACGCAATTGACATTTGGTGTAA  
ATTTAAAGAGAACGATCTATATTTAAGGAGAGAAGTACTCTGAAATTTTCTTGAATAT  
GAGGCAGAATTAATAAAGAGAACATCACTCACATCACTTGGGAAAGGGCGGGGAACAGC  
AACGGCTTCGTGAGGATTTTAAAAGAACAACAACATCATAAAATATTCTACTAGTAAATG  
GTTGTTTAGTTAACTAACACCTGAGATGAGACTTTGTTTTTTTTTACATAGGAAAGAAA  
ACTCTCTCCACCTTGTTAACATAACATAACATTGTTGCCTCACAAGACAGGAAATAACA  
CAACCACAGTTAAGAAAGCCAAAAATTTCTCCATCATTTTGCACATACCTCTCTGGGATT  
CCTTTTTTTTAAAGATTGTTCTTTGTACCTCACATATTTATAAACACATGCTGCCCT  
CTCCAACCTCCATATGCTAACTGCTTCTATATACAATAGAGAGTTTCTTCCAATTCCA  
AACTGAATTGAATTTCTGTAAATTAATCAATCTATGCACCACAGTTTTTGGAGAAGTT  
AGAAGAAAGAAGTCTATATAAGTTAAGCATATAATTTGATTTTAACTTACAAGAGAAGC  
TCAATTCATTTAGCTTATGAGAGAACTCAATTCATTTTATCTTCTTTTCTTCTGTAAT  
TAAGTGGTTATGAAGAAATTTATTCAACCAGGACTTCAGTATCAAATTTATGTGAGACAG  
ATCTTCTCCTAACATATTGCAGTGCTTGGGCTTCCATCCGAGTGTGCTGTTGGTGTCTC  
TTATGATGCAAAGGCCAAAGAGATATTGAACTTGCAATAGTACTTTCATGCTCGGCGAG  
>Glyma02g09550 | Gm02:7475050-7476549 REVERSE

AGCTCTTACCACGGCATTCTATTCTTTGTGATACTTTTTTTAGTGGGTTACATTTTATA  
CAGTGCTGGAATCATATTGTTAAAGTGAAGATGATTTCCATGAAATGCAGGAATTGAA  
AGTCCGAGCAGAAGCAGCTGATGTTGCCAAGTCCAGTAATTTTCTGGCATGTTGTTA  
TCACAGTTCATTATTTCCAGGATTACTTGCTGATCACAATTAGCTAAATTTTGTTTTTAT  
TTTCAGTTTCTAGCTACGGTCTCTCATGAAATTAGAACACCCATGAATGGTATTTTAGGT  
AACTTCAACAGTCTGCCTCTCTATCTCATTAAACAAAAATGTGGCATACTCCATAACT  
TGAACATTTCCATTGATGTTGATATCATTTAACTGGAAATTACTGTAGGAATGCTTGCTC  
TGCTTCTGGATACCGAATTGAGTTCAACCAACGAGATTATGCTCAGACTGCTCAAGCAT  
GCGGCAAGGCACTGATAACATTAATAATGAGGTGCTGGACCGTGCTAAAATTGAAGCTG  
GCAAGTTAGAGCTGGAGGCTGTTCCATTTGATCTTCGGTCCATAATTGATGATGTCCTT  
CTCTTTTTTCTGAGAAATCTAGACACAAAGGTTTAGAGGTATGCTTCATTTTTTATTAAC  
TACTACAAATGCCATCGCATTGTTTTGCTTCGTCCAAGTTTACCATTCTATTTTTTAA  
TTGATGAACTTATACTGTTCTTTTCATCTCTTTTTCACCTTTTGGTGTCTTATGCCACTC  
GATGTTTCATGTTCTGATGCTCATACTGAACCTGAACCTGAACCTCATATTGTCAATTGTG  
GAAGTAAAGCTGGCTGTTGTTTCTGACAAAGTTCCAGATATTGTCATGGGAGATCCT  
GGGAGATTGAGCAAAATAAACAATCTTTGGCAACTCTGTTAAAGTAAAGTGAATT  
TTCACATCTGTCAGATGTTATTTGCATTTGGAAATGCCATTCTAACTGTTTCAATCTTCT  
TATCTTCACTTTTATTTAGCCTTTTGTCTTTCTTTTCCCCACAGTGGGCAGTTGTG  
GAAGAAAAAATTGATATTGATGCTTGTATCCTTCATATTTATTCTTTCCCTTGTATACGT  
TAAATTTATTCACAAGGTAAGTACTTGTGCTTGTGATAACATTAATAATTTGCACAT  
CTTGAAGTTTACTGAACAAGGGCATATATTTGTTAAAGTCCATCTAGCGGACAACCGAAA  
GTCCATGATGAATGGAAAACACGAGACTTTTCTAAATGGAGAATCAGATGAAGTTTCTA  
TATATCTGGTGATTATCATTTCAAAACCTTAAAGTGGATGTGAAGCAGCTGATGAACGGAA  
CAGTTGGGATAATTTTAAAGCATCTAATAGCTGACAAAGAATATGGCCTTGATTCTTCTAG  
AGAAACAATGGCTGCTTGTGAATCTTCGAGCAAGTCACATTGAGGGTATGCGTGGAGGA  
>Glyma02g05220 | Gm02:4231677-4233176 REVERSE

CCCTTTTCCAGTATTAATTCTATTATATTGTCGTTTAAAAAATAGTCGTATAAATGTATT  
CCGAGCTTTTGTTCATAACAGTAAAAGTGGACCATAAGAATAATAAGCATTGAACATAG  
AAAAGCAATGATAATTGGGATTCGTTCTTACATTACTTCCTGGCGGAAGCTTCATGAT  
TGAAGACAAAAGAGACTAGTGTGGGCACCACTGCACCCGATTCATAGTATCCAAACCCAA  
ACACCACACGAGTTAAGTTCCTTGGCCTTGGGTTCTTCCCTTTGTTTGTAGTAATAGCAA  
TATTTATGGTTCACATTAATTGGGGCACAATGGAAGTGGCAATTGTGGCATAAATATGG

ATAAGAAAGGCATAAGGAACAAAACACCACCACATCACTCTTACACTTTTGCACACACTA  
CGACCAGGAAATGACATGAAGTACAATTAGCATGATTGAAAAAAGCTTAAAGGCTACTTGT  
TTGCATTATATTTTCAGTGCAAAGATTTTCATATGGGTTAAGCTTAAGCATGTAGTTTTGG  
TTTCATTTGAGATCTATGTTTGTGGAAGCAAAAATATTATTGATAATGCTTGATTTTAG  
AGAAAATAATAGGTTTAATTATTTATTTGGTTCTTATTTTATGTTTTGTCCCTATGTCAA  
GAAATTAGATGTTATACTCTCTATAAATACACTTTTAAATTTAATTCTATGTTGATCCT  
AATGTTAGGTGTATCTTAACTTTATTAAGTAAAACATAAATAGAAAATAACAATGTATAC  
CCACTACATTTTTTCTAAATTTGCTAAACTGCCACAACTTAATAATAGAAAAGTAAAATG  
ATATTA AAAAGACGTGCAGAGACTAAAATATTTAGTTTTAAGTATATGAACTAAACCATA  
AAAATGATGTAAACGTAAGTTTGAGTAATTAATCATTACACAATTAATCAAAACCAT  
AAGTTTGTTTGTTAAGTTTATAAATAATTATTTAAAAGTCTTACATGACATAATTTAT  
GAAGGTTAATAATAAAAATTCCTTGTATTGATAATACATAAAAAAAAAAATTTAATTTAT  
TATTAGAAATTAATTTCTTGTGCTTGTCCGTGGGAGGAAACTATGGTGGAAAAAATATATT  
GAAAAGCTTTTCTCTGCCAGCCACACAAATATATTAATAATTTGTATCTCTTTACAATC  
TCGCAAAACAGTGTAAAAGGGTGACATGACTTCCACCTAAGTAGAGTCTAGGAAAGGTA  
GTAGATGACGCAATCTTAGCCTAGATAGGTTTCGTGATTTTAAATAGGGGAAGTGTATTA  
TCCAATCAAAATTCGTGAAAAGCTATTCCCCTCTCAAGCACACAAACAAAGTTTAATTGC  
TACTTTATATGCTCATGGCTGCTTCAAGTAACACAACAGTGAGTTATATGTGACAGAAGA  
CAAAGACCAAAGTTCTTCTGAAAGTTCTGTATGGTCTCTCCAGGTTCAAGGTAGCCAATA  
>Glyma02g47610 | Gm02:51134886-51136385 FORWARD

AAACCTTCCCACCAGATGATGAGATAATCATGATACATCCTCAATTAGCTAATGCTGCA  
CACCAATCTGGGGAGAGAGAGAGAGAAAGAGGGGACAGTTAACATTTTTCTTCTGAAAA  
ACAAAATGGGTTATATCAGCAAATTTCAAGAAGATGATGGTCACTGTGTGATATTGTT  
TGTTCCAACCTTGTATGCTTCTTTGGGTGTTCAAGAGTCAAGTGGCAGAAACAACCTG  
TTATAGAAAAAGAACAATTTTCCCATCTCATCCACAACCTCCTCAGTGGGTTTGATT  
GGTGTGATTATTACCCCATGCTCCTCTTCTTGTATGTTATCTCTTCAACTTCAACCTTC  
ACGGATATCCACAAAAAACAACCTTTTTGGTTGGACCACTCCAGTTCAAGCATAGTGA  
GCTCCTTTCTTGAGATATATCAACTGGGTTTTGTGCAACTTTTCTCTTTGCCTTGTTGA  
ACAGGAAGTATCATAAAGCACCAAACCTTTGTGCGCCCTGAGGGTGGATTGCTGAGAAAT  
TTTTGGGTTTGCTTCAATTTTGCTTTTGCAGTTGAAGATTCATGGTGGGTTGCTTGGTG  
GTTCACTTTTTGAATGTTCTGCTCAAGCTGCTGGGGCTTGCCTTGAATCTCCAGGACTG  
TTACGTTGGTGAATTTGGCAAGGATGTCTGTGAATCGAAGGCTTCTGCTTCAAATGGTA  
GATTGCTATCAAATATGAAGCTTGGAAAGCTGAATGAGCCTCTGCATGGGTCTAATTGTC  
CCAGGGCATGCAGGAGGAAGCCCTTGTCTTTGGTTTTTTGGCTTTGTTGCCATAGGGA  
CTGTTTGGTTCATCTTGAGTTTCAATAGTAAGTATTTGATGAGCAAGGAGAATGAAGCAA  
TTTGTGAAGAGAGAGAGAGAATCTTGCTACAACGTTACAATGTTAGTAGGAAACAGATTC  
ATGCTTTGGCTTCTTGTCTCTGGATCAGATCAGGTGAACATACTTTCAATTTTATTG  
CTGCATATTGTGCTCGCTGAGGATAATTCATAATTTACTTTTGTAGAAACTTTAA  
TTAATTTGGCTTCTTCTATGTACTAAGTCTTCTTCTATTGGGCGTTATTGCTACTAAAC  
AAACAACCTTCTTGTGATTATATATTTGAGCTGAAGTGAAGATGTAAAATATTGAGAA  
CCAATAGATTGTCTTAAATGAAAGGGTATAAACCATGCTCTTCTGATGCTTTTTCCGCAA  
GGTTTCTCTAGGATCACCTTATTTTGTACAAAAGGTTGATTTCTAAAAGTGATGGTACT  
CTCTTGCTAGATTTTTGATAGAAAACAGTGATTGTTGCAGAGATAAATATGAACAGTAAC  
AAAGTCGTGCTCTTTGCTCTATGTCTTACTAAGTTTATAATGCAGATTTTATCCAACCTGT  
ATTGATGAAAGAAGACTTCAAATGCTGCTAGGCAGCGGCATGGTTAGCACTCCACAGTTA  
>Glyma14g01040 | Gm14:565485-566984 REVERSE

AACAGATTCATGCTTTGGCTTCTTGTCTCTGGATCAGATCAGGTGAAGTGCACCTTTCC  
CCTTCACTCTTTCAATTTTATTGCTTCAATTTGTTGGTTCGCTGAGGATAATTCATAATTAT  
TTACTTTTGTAGAACTTTTACTATTTGGCTTCTTCTATGTACTAAGTCTTTTCTTTTAA  
TCGGGCGTTATTGCTACTAAATAAACAACCTTTTTTGGATTATATATTTGAGCTGAAGT  
GAAAGATGTAAAATATTGAGAACCAATAGATTGTCTTAAATGAAAGGATATAAACTATGCT  
CTTCTAATGCTTTTTACGCAAGGTTTCTCTAGGATCACTTTATGTTGTTGGTTAATTTCT  
AAAAGTGATGGTACTCTCTTGTAGATTTGTAATAGAAAACAGTGGTTGTTGCAGAGAT  
GAATATGAATAGTAACAAGTGGTGTCTTTGCTCTATGTCTTACTAAGTTTATAATGCA  
GATTTTATCCAACCTGATTGATGAAAGAAGACTTCAAATGCTGTTAAGCAGCGGCATGGT  
CAGTACACCACAGTTAATATGTCCGGAGAATCAGGAGTTACAAAAGGTGCATACATGTGT







TCAATTATTCTTCTTTAAATCCTGGGTCTTTTGGTTTGAATTTTTCCATTTCTTTTC  
TTTTCTTTTTGGGTGGTGAATTTTTGCAATAGGCTTAGCTTCTTTCTTTAATAAGAGA  
TAAAATAAAGAAAAGAATTTGTCCAACCTGGTCAATCATTGCTAGTTTGTCTTTG  
GTTCTTCTTTCTGAGTTTTGAATCGCGCAAACAATGCTGCAATGATGCCGTACATGGAG  
TTTTGTTTCTGTGACTTTTTCTTCCAACCATCAGAGAAAAGTGTCTGTGTTTTGCTAG  
TACTACTTTTCTAGCTTTAAGCATAGTGAGGTCCTCCTACATAAACTCTAACCACAATTACT  
TTTGGGGCTTCTTTTCCGACTTTTATAGATGATGAATAGGGCAGAAAGATAGGGGAGGGGC  
AGAGAGAAATTGTTGGTGAATGGGTCTTGGTTTGAAGATGAAGAGCCTGAGGCACCACCC  
>Glyma04g06190 | Gm04:4738419-4739918 FORWARD

GGATTTAAGCAAAATTAATAGAAAGTAGAAATATATTTGACAGGACACTTCATATGTTA  
AAAAAAGAATAAAAAATATATGTATAATAAAATTTATGATGATGTAATAAAAAAATAAA  
AAATATTGGTTTGAATGATGATTATTTAATTAGAGGTGATGAAAAAGTACATCCATTA  
TGGGAAGCATCACCCACGTCACCTGGGAAATGGCGGGGAACAGCAACGGCTTCGTCTGG  
ATTTAAAAAACTCAGTGTCCCATACACATCCATTTTCTCTCTACGGTTGAATCCATT  
TTTGGGCGAGAGAAAAGAACAACATCACAAAATATTCTACTAGTATATGATTGCT  
TAATTAACACTGAGACTTTGTTTTTGCAGAGGAAAGAAAACCTCTCGACCTTGAAAGGT  
AACATAGCATTGTTGCCTCACAGACACAGGAAAGAAACACAACCACAATTAAGAAATCC  
AAACATTTCTCCATCATTGTTGCACCCCTATTGCACATACCTATCTGGAATTCCTTTTT  
ATCAATTTCTTATTAAGTTTGTCTTTGTACCTCACATATTTATAAACTCATGCTGT  
CCTCTCCATATGCTAATACTCCTCTATCCTCTCTAGTGATCAGCTACTTTTCTGTGAT  
GCATTTGAATCCTCAGTGGAAAGAGATTCTTCTCAGAGTTTGATTCTCCATTTAATTTCT  
GAGGTGGGCTGCAAATGACCCTTCTTTTCTTTTTGGATACAATGATGCAAATGATCTTT  
TAACTTAGAGTTAGTTATTTTTATCCCTTTCATATCAATTTACTTTATCTGTCTGGAC  
ACTGAGTTCTGTTATTCTATGTGTATTCCAATGCAGTTTGTCTGGAAAACCATAGTTC  
TTTTAAGAGAAGAAAATAACAAGGTAAAATGAATTGAATTTTTATAAATTAATTAATC  
TATGCATTCCATTTTTTTGAAGAAGTTAGATGAAAGAACTTTTATATGAGTTAAGCATA  
TAAGTTGATTTAACTTACGAGATAAATTTAATTTATTGTAGCTTATGAGAGAAATTCAA  
TTCATTTAGGATAATTTGTTAAAGCTTATTTGTTAAAATAAATGTTTATTTAATGATAT  
AAGCGCTTAAAAACAACCTTTCTGTTTTTCAATGTGTTTGTCTAAATTGCTTATGCTT  
AAAAAATAATTTGAGTTATTTAAGAAATAAATCTTCAATCTTTTAAAAAACTCT  
TCTTTAAAGTTATTTTTTAAAGCTTAAAGCAAACCTTTATCTTCTATCTTCTGTA  
AGTGCACATGGAGAAATTTATTCAACCAGCACTTTAGTACCTAACTTATGTGAGACTGAT  
CTTCTCCTAACATATTGCAGTGCTTTGGCTTCCATCCGAATGTGCTGTTTGCAGGCTCTT  
ATGATGCAAAGGTCATAGTGATATATTAACCTTGGACTAGTACTTTCATGCTCCTCGAG  
>Glyma09g00490 | Gm09:217947-219446 FORWARD

TCAGTTCTGCATCACGTATTTGACTATTTGTATTGCCTTCTTAGGAACCTTGCATATAA  
ATGTTACAACATTGTTATTGTTGCAATTTGGTCTTAATTTCTAGCAATCATTTCATA  
ATTTATGATTGATTGATATTGTAATAAATCTGTTTATAACCAGATTTGAATAAAATCT  
GAATTATGACCATTGGTATAGACTATTTCTAAATGGGCAGATGTTTCACTGCTTGGG  
GGCATGGGCACCTTTCGTAACCAAGAAGGACACCTTACAGGAGTAAGGTTAGAACTA  
AATATCCATGGCTGTCCAGTTACTTTCTAATTTTTCTCCCTGATTACTGCAGATTTAGTT  
TCCTCTTCCGCATTAATTCTGCCTATATATCAGTGGCTGTGTCATTCAAAAATAATAAGA  
GAAATTAATATTTCTTCCGCTATTCTTATAGTCACAAATAAGGAAAACAAGCATAACA  
AGAGGTCATCTAGAAGCTCTGAGCGAGTATGGTATTATTGCCATGTATCCTAAGCCTCAA  
GAAATCTTACATTTGGTAAAGCCAAGGAGATTGAAAGTTTTTGGCAGTGTATAATACAT  
GCAGTTATATGGTGTATTTGGTTGGTGAGGAATGATTGCATCTTTATGCTTCAGAAATTG  
TTTTGAATAAGATTGTCTTCTAGCCTCTATCTGGTTCTCCTGTGGTTCTTTGAGGGAG  
TTTTCATTTATCATACGGAGAGAGACTGGAGAGCTGGACAGCTTTGTTGAATTTTTAAT  
TGTTTTGGAGGATATTTATCCTCCCCTTGTTCAGTTTGTCTTCTCTATAAAATATCA  
TTTTCTATTTAAAAAAAGACTTGAAAAGTTTTATATCGTATAACCGGTAGTACTCTGT  
CATGAATAAACTATCGTAAAAGCTTAAAGCTATTGGGTGAACTTGAATGATTTTATATTGC  
ATCTCTGAAATGCCCTCACACAATAGCCCTTGGGATTAATAATGTGGATAATGCACAC  
GCCATCTATCTTGCCTGAAATTTATCTTTCCATTAGAATAATTGGGGCAACATTGATC  
GAATTTAGATCGATCACTTGACCGTGCAGGCTTGGATACCATGTTAGGAACCAACTATC  
CCAAATGCTTAAAGATGTTAGGTTAAGACATGAATGGTTTGTACTACATCTCTAACTTA  
CTGTCTCATTGCTGCCTTTGTTAATTAGGTCAGTTCAACATTATAGTTTATGATTTT

ATAGTACATAACTATCTTATTTTAATTCGATTTTCCTCTTTTATCTGTGGTTAGAAACAC  
ATGCCAGGGGAATTGAATGACAGAATGTTCTGACATTAATATTCATTTGATAGCTGTTT  
TCATTCGAATATTATTGTTGTTTTCATCTGTTCCATTCCCATCTATCTGATGCTTAACTT  
TTCCATCTTTAATGTAGTTATGTGAAAAAGGAAAAATCGCCTGAGGTGGTTCAAACACT  
>Glyma11g08310 | Gm11:5889150-5890649 FORWARD

GTATAAGATTAATTTGTTATTCATTAATTCTATTTTTATGTGTAGAAATCAAAAATAGC  
TATTAATAAATTTATAACAACCTCATGCTCATTGTTTAACTAATCAACCCAGTTAGATCTT  
TTTTATTATTTCTGATTTTAATTGCATTACTGTGGACTATGTATATGCTTTAGCGTCTA  
TACTCTATAGTTCCCTTCTTATATTTTGTCTTTTGATTAATCGTCTAATAAGTGAAA  
TCGGTGCAGCTTAATCAATCTTAATTAATCCCCATAAATTAAGTTCAAATCCAACCTCGTGT  
TCTACAATGTTATTATAAAAGAGTTTTTCGTGTATTCTTAGTATAATTTCTTGTGCTGTT  
AATCAAATAAAAGTTATATTAATATAATTTTAAAACAATTATTATAAAAATTAATAAAA  
TAACTATATAAAGCAATATGCGATTAGCCACACTGTGAAACACATTTACATTGTGTATG  
CTAATTATATTCTATTATAAAGTGATCTTCACTACAATTGATAGTTTGCCTAATCATGAC  
ATAGGTAAAAAATAAATAAATCTTGTAAATAGAAAATGTCACCAGTGAAAGATGGTATAAA  
AGTATGGCCTGATAATTTTCAGAAATAAACGAGCTTATTATGTCTTTTCTTTTGTATCTC  
CAACAATCCCTCTTTTAGTTGTCTATTTCTTAAATTAGTATTTCTTTTACAATCTAGGA  
AATTAATAAATAAGCTAATATATTTTATTAATAAATAAATAAATCAGCAGTTGAGATTTA  
AAATTGATCATTCAATAAATAACTATGAAATAAGAGGAATGAGAGATAATAACAATTAT  
TTTACATCTTCAAAGTAAGTAAAAAATACTCAATAAAGGAATAAGAATATTAATAAATAA  
GATAATATAAATAAAGATAAAGATAAATAAATAAATAAATAAAGAACCGATGGTTAATGCACA  
TAATATGATTATTTTTTCCAATTTATTTTCACTCAAAAGTTCAATTAATAAATTTAACTT  
TAAACCACACAAATTAGTCTAACTTATGTCAAATTTGTTATTGTTATAAATTTTTACTCT  
TTAGGGGAAGTTTTATAGCTTAGCATTATCAGTATCAGTCTTTTGTCTTTTCTTTAGTAC  
AGTATAATATTGGAATGCGATAAAGATCTTCTCAATGTATGTCTAATATGAATGCATTA  
TAAAGATAAAGGATGCATTTATTTTTGGTACAGAAAATAATGCATTTTGTAAATAAACA  
ATATGTTATGATATTATAAATAAATCATCAATGTATTGATACGCACACACTCACTATATA  
TTGAAAACCTAACACACATACAGAGAGGCTTCTCTGTTTGACACACAGGCCAAGCATAAA  
CAAGTTGGAATCTCTCAGATGAGTTGCTTTATAACCTCATACTCATAGATTCTGCAGTGA  
GTTATGGCAGAAAACAAGACGAAATCTATTCTGAATGTTACCAGGCTCAAACCTCTCCA  
>Glyma08g05370 | Gm08:3808914-3810413 REVERSE

AAATATTCTCAGGTCAAATCAAATGGATTTAAACAAATATCCACGAGTACAAGGCAGA  
AAAGTACAAGGAAACGATGAACTGAGAAATACCCTGGTGAGAGAAAATAAAAATAAATG  
ATTCGGGTTGCATGAAAGTGCCTGCGTGGTTCCAGCGAAGAACCAACAAGAGTGTGAAA  
ACTTTCAATTTTTTCCAGACATGCAAGTTCCAAAGTGGAAAACAACAGCAAAAAGGTAAT  
AGTTTTTCCAGAGTTCACTCACTGTGCTCTATACCAAACGCTTCACTTCTAAAGCTATC  
ATCAACTTGAAAGAAAATAAATAAATAAAGATTACTAATTTGGGGAGGAGACAGTGAAGT  
ACACACATGGTGTGAAAAGAAATTCATTAGCATTGTTACAAAGAATGAGAGAGAGGGCTT  
GACTTGACTGGTGTACTATATTTTTGTGTTGTGTGACTGTGAAGTGAAGGGGAGGGG  
ACAACACCGTATCTGGAATAATCGTGAATAATCTATTTAGTTTTCTGATGTGCTTAAATT  
AAGCAAAGAAAAAAGCAAAGCAAACACACGATAGTAATAAAGGGTATAAAGAAACAA  
ACAAGTACATAGTGAGAGAGAGAGAGAGAGAGAGAGAGAGAGGGCACACACACAGATC  
AAGTCAAACAACCAAACCTGGTTCCAATTGTTCAATTGTACAGCCACCTTCTTCTTTTCT  
GTACAGACAGGTAACATGGTTTTTCTCTCTCTCAAGAGTCTCAAGAACCCCCCTTT  
TTCCATCTCAATCTCTTTCTTATTGGGTTGTGTGCTTCGCTGTGTGTATGGTTTTTTG  
GGGGTCAATCTCTGGCTTTGATTATTATATGGAGGAACCTGCTCTTCTTTGCTTAAAGC  
AAACTAGTTTACGCCTACTCAGCATGATTATTCATTAGAGTTCTCTTTCCATTTTTT  
TATTCTCATCTTAACTACCAAACCTCTGTTAAACACACAAATATTGGCTGTTGGGGAAG  
GAGAAGGTGGTCTTTTGAATTTGAGCTCCTTTTTTTTTTTTACATCTTTTGGAGACTCAT  
GCTTGTCTCTCAATTATTATTCTTCTTTTAAATTCTGGATCTTTTAGCTTTGAGATTTTT  
TCTTTTTTGAATAGGCTTAGCTTCTTTCTTAAATAAGATAAAAATAAAGAAAAAGAATTT  
GCCAACTGGTCAATCGTTCATTGTTCTACTAGTTTGGTTTTGGTTCTTCTTTCTGAGTT  
TTGAATCGCGCAAATCAATGCTGCAATGATGCCGTACATGGAGTTTTGTTCTGTGACCTT  
GAGAGAAAAGTGTCTGTGTTTTGCTAGTACTAGTTTCAACTTAAAGCAAATTGAGGTTT  
TCCTATAAAGCAATAACCAGAATTATTTTTATTTTTGGGGTTTCTCCGACTTTTATA  
GATAATGAATGAATCGGACAGAGAGAAAAGAAATTGTTGGTGTATGGGCTTGGTTTGAAG

>Glyma07g27540 | Gm07:30902949-30904448 REVERSE

TAGAACACCCATGAATGGTATTTTAGGTAACCTTCAAGAATCTGTTTCTCTATCTTATTAA  
CAAAAGTGTGATATATGCTTTCATAACTTTTGCTTTTCTATTGATGTTGGTATCATTAA  
CTTAAAATTACTGTAGGAATGCTTGCTCTGCTTCTAGATACAGAATTGAGTTCAACCCAA  
CGAGATTATGCTCAGACTGCTCAAGCATGTGGAAGGCACTCATAACATTAATAAATGAG  
GTGCTTGACCGTGCTAAAATTGAAGCTGGCAAGCTAGAGCTGGAGGCTGTTCCATTTGAT  
CTTCGTTCCATAATTGATGATGTTCTTTCTTTTTCTGAGAAATCTAGACACAAAGGT  
TTAGAGGTATGTTAATTGTTGATTAACCTACTATAAATGCCATATCATAGGTTTGCTTT  
GTCAAAGTTATAAAATTTACCATTCTATTTTTTTGATTGATGAACCTATACTGTTCTTT  
CATCTCTTTGTCACCTTTTTGGTGTCTTATGCCACTCGATTTTCATGTTCTGATGCTCA  
TACTGAACCTCAACCTGAACCTCATATTGTCAATTGTGGAAGTAAAGCTGGCTGTGTTTGT  
TTCTGACAAAGTTCGGATATTGTATGGGAGATCCTGGGAGATTGAGACAAATAATAAC  
AAATCTTGTGGCAACTCTGTTAAAGTAAGTGAATTTTCATAGTTTGTTCATCTGTTGG  
ATGTTATTTGCATTTGGAAATGCCATTCTAAGTTTCTAACTGTTTCAATCTTCTCACTT  
TTCTTCCCCCCCCCCCCCCACAGTGAGCAGCTGTGGAAGAAGCATTGATATTGATG  
CTTGAATCCTTCATATTTATTCTCTCCCTTGTGTACGCCAAATTTTATTCACAAGTACT  
TGTTGATAACACTAATTAATTTGCACATCTTGCAGTTTACTGAACAAGGGCATATAT  
TTGTTAAAGTTCATCTAGCAGACAATCGAAAGTCCATAATGAATGAAAACACGATACTT  
TTCTAAATGGAGAATCAGATGAAGTTTTCCATATATCTGGTGATTATCATTTCAAAACCT  
TAAGTGGATGTGAAGCTGCCGATGAACGGAATAGTTGGGATAATTTAAGCATCTAATCG  
CTGACGAAGAATATGGCCTTGATTCTTCTAGAGAAACAATGGCTGCTTGTGAATCTTCTG  
AGCAAGTCACCTTGAGGGTGTGCGTGGAGGACACTGGAATTGGAATTCCTTCTCAGCTC  
AGGATGGGATATTCATGCCATTTGTGCAGGCTGACAGCTCAACCTCACGAAATTATGGGG  
GTACTGGTATTGGCTTGAGTATCAGTAAATGTCTGGTTGAGCTAATGGGTGGTCAAGATAA  
ACTTCATAAGTCGACCCAGGTTGGGAGCACCTTTCTTTTACTGCAGTTTGTGAAGCAT  
TTAAGAAAAGTTCAGTTACCAACAAGAAGAAAATTTGGAAGATCTGCCTTCAAGTTTTA

>Glyma19g40090 | Gm19:46552180-46553679 REVERSE

TTGCACGTTAATATAACACTTACTCATTTTTATATCAATTTCAATTTATCATCATACATTTAC  
ATATGAGTGAAACTAAATATAAAGTAGTATTTTTGCATTTCTTAAAAAAAATGTAAAGTA  
CCATTGAATATTATGTTAATATAATAATATTTAAATGCATTAATACATAACAAGTATATT  
AATAAATACATATAATCATGCATAAAATATGCTTTTGTAAATTGATTTTTGGTCAAATTT  
GATTTAATCCCTATAATTTTAAATTATTTAATTTAGTCCTTTTATGTAAAAAAAAGCA  
AATTTAGTGTGTTGTTCACTAACAAAGTTTATCACAAATATAACGTAAGTGTGGTTCGTTCA  
TTAATTTTTTTGAATTAATAAGAAAAATGTATAAATTTAAATAAAATAAAAACAAAATGT  
ATAAAATATAATATAAAGTGATTTTGTGTTATTTTTATTTTATATATTTTCTTACAATT  
TTAATAAATGTTATACGCATATTTGTTCCCTCTGTTTACTGGATAAAATTTTAAATGAGA  
GACTTTATTGGAATAATTTAAAAGAATGTGAGAAATAATAGTATAACAAATTTAAATTA  
GATAACTAAAATCACAAATAAATTTACATCAAAACTAAAAGTGAATAAAACATAGAG  
AGAGTCAGAAGTATTGAACCAAGTTCGGCAGCATGAGTGAAGAATAAAAAAATA  
TAAAATGTACAAAATATATATAATTTAAAATGTATTTTTAGATGATTTTTAATAAAAA  
AAAATATTTTTAATTTCTAAATCAGTATTTTAGTTAAGAAGATGAAGATCCATGATGAA  
AACCCGTTAGATGATATTGGGCAGCAGGCGTCCGATTGGATAAAGAAAGAAGGCAAATG  
GGAATTTGGACCGGATACGCTGGATTTACACCCATCTGTCAACACTCGAAGGAAAAGTT  
AACACACATTCATATAGTGTGGTCCAAATTCAAAGAACTTCACAATGCCATGGCCTAGA  
AAGTTGATTGATCACACAAACACCAATCAGAATTCAGAATTCAGAATTCAGAACTCGCG  
GTTTACTAATATTATTCTTTTGAATTTATTTTATACGTACCCAGAAAAAGTGAAGCTGA  
GTAGGCCAGGCCACCGTCCAATGAATTCCCATTTCCAGCCTCTAACAGAAAATTTT  
GGCAAATATTACCAAAAATGAGAAAATAAAATAAAAAGGTGCCAGCCAATCCGAAAATGA  
TGTGGCACGTGTGTAAGCGAAAAGTAAAATGAGAGAAGCATGGAAAAAAGGGCACGCC  
CGAGTGGGAGTAGGCGTTTGCCATGCTTGTCCGTGAGGGATGGGCTTAACGTTAATCTCA  
TGTCATGCTTTTTAACCCACTCACACACTCTCTCTTTCTTCTCATGCCCGCCTCCCTTTC  
TTCTTCTTTGGTAACATCCTCTTCTATAAACACTCTTTATTCTCTCTATTTACTTCC

>Glyma03g37470 | Gm03:44081715-44083214 REVERSE

AAGCAATTTATCTGTCTATTATAATTTTCATGAACCTAAATTTGATTTTCATTTTTCTTTT  
TTCTTATTTTGTCTTTTTATTCTTTTGTTTTTCTCCAATTTCACTTTATTTTTTATTTC  
TTATTTCACTTAACCAAGGATATCAAAAAGTCTAGTTCAATTGATTGAATAGAGTATAT

AAGTATTATAAATTTATTGGTACTGCATTTAATTTATATTAAAAAAAAAAACTTAACCAA  
GGAGTAAAACCAGTAGAAATTATAAGGACGGATGCATTATTATCATTACTGTCTTTTTTA  
TTTATTTTGTAAATGGGAGATTCTTTTTGGGACTTACAAGAAAAAGAGCAAGATGAAAT  
ACAAGAATAAGAAAGCGAAAAAAAGAGTAGAATGCTATGAATATGAATGATCAAATATGG  
ATTATTCATGTACTATTATTTAACTCAGTTTTTTTACAGGATTATTCAACTTAGTTAGCT  
GTAACCACTATGAATTTATTTAGATTTTACTTAAAATAATTCAAAGTATTTTTATTCTT  
AAAATGACAGTTTTTATTTATTTTTATTTTGTGCATTAATTTGTAAATTACATATTAG  
AATTCAAGAAATATTTTTTTTTTTCAGATTCGGAAAGAATACTTTCCAAACATTACTTCATA  
CATAATGTAATTTTGTAAATTTCTTTTAAAGAGTTAATATTAATAATGTAATTTTAT  
ATTATCATTAAATTATAAATCATCATTTAAATTATTTTAAAATAATTATTTTAAAATTTT  
AATAAATGTATCATACGTAATATGTTATGACTGAACGATTATGTTAAATTTTCTATATTA  
TTAATGTATATTTTTTCTTAAGTCTTTTTCAAGATATTTTTTATGACATATTCAAGATAT  
ATACTTTTTATTTGAAACACAAGTATCTCTTTCATCATAATTTTATTCAAGATGAATATA  
ATTATTATAAATAACAAAAGTTTATATTCAAATAATTAACATAATTTGAATATGAAATCA  
GTGAATAAACACCAATTAATTTCTTAATCGAAACATGTGGTTTGATAAACAAACAAGCAA  
TTGGAAATTTGGACCGGATGCACGGGATTTGACACCCATTAGGAAAAGTTAACACACATC  
GATATAGTGGTCCAAATTCAAAGAACTTCACAATGCCACGGCCAAGAAAGTTGAATTAC  
GAACACCAAGCAGAATTAAGGACTTCAAATATATTTTTTTGAAAGGGTGAATCGAATCT  
GAAATTTATTTTACACGTAGCCAGAAAAAGTGAAGCTGAGTAGGCCAGGCCACCGTCCA  
ATGAATTCCATTTCTAACATAAAAAACCACAGCCACATTAGCTTCTAGGCCAAAATGA  
GAAAATATAAATAAAAAAAGGTCCAGCCAATCCGAAAATGATGTGGCACGTGTGTA  
ATGAGAGAAGCATGGAAAAAAGGGAACGCCCGAGTCAGAGTAGGCGTTTGCCATGCTGT  
T

>Glyma05g28070 | Gm05:33958556-33960055 FORWARD

CCCCATTTGCCCTAACTCCGTCTCAATTTACGCCACATGCCAAATTTCTTGTCCAAC  
CTTTGCCTTCTTGCTGCCTCCTTTGAGGTAACACATCAAGAAAAGTTCCACCCAACGT  
GACTATCACACCTCCTAGGGTAGAGGTGTTTGTATGGCTCCATTTTATGTACCTTATTA  
TTACATTTTACACGTAGATTAAGCTTCTATATATCTACCTTTATTACTTTGGTGTCTCA  
CCAAGATGGGTGAATGTAATAAATTCAAACTTGTGCTAATATGTTCAAATTTGGTTGCT  
GACTCACCAAAATCATGATAAACTTGTTCGAGTTTCTTTTTAGTGTCATTTTTTATTGCT  
AGAAACTAAAGATAAATATGAGAAGATTTATTACAATTTATACATACCGTTCATTCAATT  
AAGAAAAATCTGTTGGTGAAAAAAAACACTTATAAACTATTGTTCTATCTCTTAAAT  
AGTTACTATGAAGATCACTTTTATTTTATATAGAATAACATTATCGTAGTTGGAGATT  
CCCTGCCTTATTTCACTCAACTATTACATATCTCAGGTTTTTAGTTTTAATTTGACAAT  
AATAGAAACCTTATTTTAAATTTTCTTTTGGATCTGAATACACGTTAAAGCCATTTTT  
GGGGGCATAATAAATACCCTTACATATGCAATGCTAAAAAAGTTAAACTAGGACACTAC  
AATATTAGGAAAGGGGAGAAAAAAGAAAAGAGAGAACAAGTTCTAATGGGTAAAGTGA  
CAAATGACCTAAGTTCTCTCACAATGTTCCATTCTTGTGTTGGATCAAATAAATATTGGC  
AGAGGAGAGTGAACAGTGATGTCCTCAGAGATATAGTGTCTGAATTCAGCGTAAAGTT  
AACTAATAAACTATAAACTAAACAGTAGACGATTTCGAGGGGAAAGAAGAAGAT  
AAATAACACCTCGAGAGGTTCTAATCATGCGTGGTGCCTCTATCTATCTATATACCTACG  
TCTTTTACTCTGGGTCCCTCCCTCCCATGGCAATTTTATAAAGTACTACGGGGTATCAA  
ATGCCATTGTGAGCAAAAGAAGCTTACGCCTTATTCTTGAAATTTTGGTTCCATGCAGGG  
GCACTTTTGCCAACACAAAAGTACAGCTAAACAAACACACGCACGCACAGAGCTAACGAC  
TTAGCGTGAAGAAGTTGTCTACTGGCATGGACGGATAGGGATGTGAACACAAAGCAGACC  
AAAGTTAAAAAAGGCTGTGATTTCTGCTCAGTGGAATATGCCTTTTCTCCCTCTATTT  
TATTATTATTGTTATTACACTTGTGTTCAAATATACAATAATAAATTTATTTTTATAA  
TAAGCTTGTAAATATATAATGTTTATTGCTATATTCTTTTACAAGTATTGTTTTTTG  
AGTGGATAGTTTGGAAAGAGATAATGGCCTATAATAATTTTTGAAAACATTTGTGCTGT

>Glyma12g37050 | Gm12:40025318-40026817 REVERSE

TGTTGTTCTTAATTGTCCCAAGGGCAAGGTGTGTCCTTCAGAGGGCATCCCTTTTATGCT  
GAGGAAGACCATTGTTTGAATCTCTATCTCTTCGTTTACATTCATTGTGGGATAGGATT  
GCCTTCATGCCTTTTCTATGCACAGGAATACACAATTTTGTTCATTTTTTATTACAG  
ATGGTTCCATGTTGCATTTATGCTCCATTTTATGTTTATGCCAGGAGACTATGTCTGACGT  
ATAAGCTTTATCAAATACATGGGCCCTGCTTCATACATTGTTATGAGTTCTGCACCACAT  
ATTTGACTCTACTATATTGCCTTCTTAGGATCTTTGCATATAATGTTCAACGTTGTTA

TTGTTGCGTGTTTGCCTTAGGAATCATTTCCTAATTTATGTCTTGATTTGATATTGTAA  
TAAATTTGAATTATGATCAGATCATAGGTGATAGATGATTTATTAATCTCTAATTTTTCT  
CCCTGATTGTGGCAGATTTAGTTTCCTCTTTGGGACTAATTCTGTCTATAAACCAGTGGC  
TGTCATTAATAAAGAATAAGAGAAATTAATTTTTCTTTGCTATTCTTATAGTCATAAA  
TAAGGAAAACAAGCTTAACAAGTGGTTATCTAGAAGCTCTGAGTGAGTATCGGTGTTAT  
GTCTTAGGCTGCATTTTAAACTAAAATCCCAACAGTAGCCTAGAGTTGTATTAATAAA  
ATATATTTGTTTTCAATTTCTCATATCTTTCTCTATGTTAAAATGATCTAGAGTTATATTA  
TTCATCATGAATTTGGGCTTATTTTATTGATCATAAATCTTGTGATTCATGATACGATTC  
GATACATAGGCTTTCCGATACATATTTTGTGTTCCAATTCAACTACCATGATCCTAAGCC  
TCAAGAAATTTCTTTCAATTTGGTAAAGCCAAGGAGGTTGAAAGTTTTCAGCAGTGTGAAAT  
ATATGCAGTTATATGGTGTATTCAGTTGGTGAGGAATGATTGCATCTTTATGTTTCAGAA  
CTTGTTTTGGAAATGAGATTGTCTTCTAGCCTCTATCTTGTTCCTGTGGTTCTTTTGG  
GGAGTTTTCAATTTATCATATGGAGAGAGGCTGGAGAGCTGGACAGCTTTGCTGAATTTTT  
AATTTGTTTTGGAGGATATTTTATCCTCCCCTTGTTCAGTTTGTCTTCTCTCATAAAAT  
ATCATTTTCTGTTTTAAGAAGACTTGAAACTTTTAAATGTAGTATAAACCAGTAGTACTCTG  
TCATGAATCAACTATCCTAAAAGCTTATACTATTAAGTGAACCTGAATGTTTTATATTG  
CATCTCTGAAAGGCCCTCACACAAGAGCCCTTTGGGATTAAAACCTTGATTATGCACAA  
CTTTTCCATCTAGTTTGTGTTTTCGTCTGTTCCATTCCCTTCTATCTGATGCTTGACTT  
TTCCATCTTTGATGTAGTTATGTGAAAAAGGAAAAATTGCCTGAGGTGGTTCAATCACT

>Glyma01g36950 | Gm01:49347823-49349322 REVERSE

TTTAGCTATGATAAACTTTATTATCAATAAGTACTGTAATATCAATGAATAATGAGTTTG  
ATAAAAAAATGACAAATTTTAGTAAATTGTTGAAGGTAGAACTTTTTAAGAAAATCT  
ATTAGTTGAAATGCTATTTTAAAGTAATGTTTAAAACAATTTACAAGTTAGTAAAAGAAAA  
TCATTTACATATCAAGCACTTTTATTCTAATCAATAAAATGTAATAAATTTATCAAAC  
ACACTCTAATCGAATGTCATCAGTGATGACAACATTAGAGGCATTTGATTAGGAAGCTCA  
TTTTGAAAAGTTACTAACTTTAACTGTTGATTTGGTAAGCTAGTAGAAATATAACATAA  
CTTATCTTATAAGTTAGGAGCTATACATTTTATTCTTCAATTTTACCCCATTTAATTTT  
TAAACCTAGAAATTTCTTGGTCATTGGGGTTTCTTAATTGTCCCCTTTTTGCATGTAGTT  
GTGGTTCAAATGACGCCCAAGGGAAGATGGGTGGCAAATGTGGCATCTGATGAAAGCC  
ATAAGCGTCATGGATAAGGAATAAAATCAGCCCTTTTCTACTGCACTGCCACACAAAAGA  
GCCTCATGACACAACACAATGAAATTTAAAAGTATAAGGTTGATTTGTCCCTTCATTAAT  
TATATTTTTTATTTCGTAAATCAAATTATTTATAATAATTCACGCATTTTATTCAATT  
GACTAAATTAATTTCTTCTCATTAGTTAATGGTACTTACATTAACCTTGCCTTTCTTATA  
TAGTGTTCTTGTAAATTGTATTAGATTTTCTAATAAGTGAATCGACATACTTGGTCAATC  
TTAATTAGTCCCATAAAATCCAATTTGTGTTCTACAATGTTATTATAAAAGAAAACCTTA  
CAAGCTACTTGATTTAGTTAAAATTTTGTAAAATTAACCTGATAAATATAAAGTAATA  
TAAAAGACATATTTAATTATGAGGTAAAAGAGATTTTCATCATTTCAAATAAATTAATA  
TGAACAAAAATAAAGCAAAAAAAAACATATAAAGTGAAGCTGAAAACCTTGATCATAAA  
TAAATTTTATCTCTTTAGGCGAAGTTTACTAGCACTTATCAGTATCAGTCTTCTGCTTTT  
CTTTAGTACAGTATAAATTTGGAATGCGATAAAAGATGTTCTCAATGTATGTTCTAATG  
AATGCATTATGAATATAAAGAATGCATTTTTGGGGGTACAGAAAAGAATGCATTTTTGT  
TAATAAACAATATGTTATGATATTATAATAATCATCAATGTATTGATACGCACACACT  
CACTATATATTGAAAACCTCACACACAGAGAGGCTTCTCTGTCTGACACGCAGGCCAAGC  
CTAAACATAAACAAGTTGGAATCTCTCCGATGTGTTACTTTATAAGCTCATAGCTTCTGC  
AGTGACTTATGGCAGAAAACAAGATGAAATCTATTCTGAAAGTTCTGAATGTTACCAG

>Glyma10g29890 | Gm10:38641689-38643188 FORWARD

TCATCAAAGAGAAAAATGAAAAGTGTGGGGGCATAGGTGCCATATTCTATGGTAAATTGT  
TGCTTTTCGATTTTTTTTTCTGAGATTTTCGAATTAATTAATAACAGTTGTTTCATGGGAA  
GCATCACCCAATCAAACATCGACAGCAACGGCAAGTACAACAAATGCGAGAGCAGCAAC  
TCAGAGATATAATTAGTCTCTAGTATTACAAATAGCACACTTCAAGATTTCTCAAGGGAAA  
GCGATAGAGTAGAAAGATTACACCAGATATATATTCTATACAATAACTACAAGTCTAAT  
CCTATCCTATATCATACTAAATTAGCGTAAAATTGATAGATAAGTTAAATTTAATTATC  
TGTTACTTAGAACATTTCAATTTGTCTGTTGGAAAAGACAAAATCATTAATAAATATCTTA  
AGATGCCCTCTAGAAAGTTTATCTTTCCCTCTTTCATGACAGCGAGCTGTGAAGCAAGT  
GAATTGTGTTGCCAAGAAAAATAATATTGCCCATACTTGACCTACTCTTCATTGATT

CTTTGTTTGAGTTTTTTTTTTTTAAAAAGAATTTAAAAACTAAATATGTTTAAAAACATGT  
AATGATTATATAATTTTTAAAAATCATTATAACTTTTTAATTAGCAATTTCTTGAAAAA  
TCATATCAAAGAACTACTTTTTTTTTAACTCAATCGAATATTTTTATAAAAACTTGGTATG  
TGAGCGGAATAGAGTAAAAAATGTTGTTCTGTTCTTTTGGTATCATCCTTCTAGTAAAA  
TAAACTCTACTACCTTATGGTTTTATATCATGTTATTTTTCTTTTTCAATATACCAA  
CATAAAATAAATTA AAAATGTTGTGTTCCGTTTTAACAAAGTTTATTA AACTTTACCT  
CTTTGGATATAATGATCAGGAAGTTGGTGAGGTTCACTTTATTGCTTCTGCAGTTCAAAA  
AATAGCAAGTTAAGCTTAGTTTTAGCAAGAATTTACAGGGAAGTGTGAAGTGAGGGGCT  
TAGGATCTTGACTTTGAAAAGAAAAATAATACCTTTACCCCATATAGGCAAGTCACCAC  
CTAGGGTTGAGGGGTGGAATTTAAAATGATAAGCAAGGTTTTAAGAAAATAATGCAAAG  
CAAGAAGAGATAAAGATGGAGGTAATATCTACTAATCTACTAAGAAAAAAGGGAGGCAAT  
AATTACCAATGAAAAAGATGGAACATGAATGGTACGTGGCGTGAGTTTTAGATTAGAT  
CTATTGGTCTATTAGTTTTAACTATTAGAGGTAAAGGTGGCCAGAAATGATAGGTTGAT  
GGGAAGCAATGAACAGAAACACAATAAGTGACTGACTTTGAAAAGTTTTCATATGAT  
TAAAGAAATATATGTGTATATATATATATATATATATATATATATATATATATATATA  
TATATATATATATATTATAAAACATAAATGATAGTTGTCTCAAGTATAAAATAAAAC  
>Glyma08g21510 | Gm08:16334343-16335842 REVERSE

CATCATCTTTTTAATAGAAATATTTGACATGACATTTTTAAGTCAACTGATGTGACATGGG  
ACTTACTAAATGGTTGGAATAAATATGATGATAATTTAATATATATATATATATATAT  
ATATATATATATATATATATGTTGATATCACATGAGTACAATGTCAATAGTATGTTGGTA  
TATGTGTTAGACTAACAAAGTCATTCACCACATCAACATCTTAGTATTATGTTACCACTTA  
AATGATATATTTATAATTTTTGTTAAAAAATTGACCGTAACTAACAAATGATGAACAAAA  
ATTGTTAAATTTGAAAAATTGAGGAACTAATAAACTACACAATTATAAAATTATATG  
GATAAAAAATGAATTTAAGCCATGATTTACCTAAAATTACATTTACCTGTGACATATTG  
TTTTGTTCTTTTTTTTTAATTTGCATTGTTTCTTTTGTATTTGCATTTGTTCTTTTTTA  
TTATACATGTGCATTTTTAAGGAAAGAGGAATGTTTGCAGACAATTTATGTGACGTTTTCT  
TTCTAACAATTTATGTGACCGATTAAAATTTATTGAAAATAATCAATTTTGATGGATCTT  
AATTTGAATTAGAAAAGAATATCATTAAATGAGAATAACATATTA AAAATTGATGATTT  
TCAATAAATTTCAATGAATTATAAAAAATATTAGAAAATACTATAAGAAAGAGTATCAC  
TAGAATTACATTATAAGAAAAAGTTACATACAAATCAAGTATGTTACTTAACACCTAAT  
CAGATAAAAAATATAAGTATTATAAGATTTATGAAGTAATAAAAAGAGAGAGGAAAAGAAA  
TGAGAAATTTGATAGAATATTTAAAATAATGAAGTATTTTTTTCTATCATTATTCATAT  
TTTAATTGTTTTGCCTGTGCGTGTACTATACAAAATAACTAAGTTTAGACTTTATATAT  
TAAAGAGAGTTTTAATCTCTTGAAGTCCACATAACTTGACCAACATGGCCTTAAATACAG  
TAGACATAGAACCACAAAATAAGTATAAGAATTTGATAAAGTGGGATATTTTTCACCTA  
TAATTACAACTTGGTTTCAATAAAGCGCAAGTACGTAATCCATCAATTTCTGTATATCC  
ATCCATGTGAAGTGTGAAGAAAATATGATCTTAGCGGTGAGATATATAATAACATTCAA  
TGTGCAAATACCATTCAAGATACTCCCCCCTAATTGCTTATGAAGTGCCCTTTCTTGTG  
ACACGATTTCACTCTCACAAAGTGCATGCAAACTTTGCAATTTGCAACCAGCTAGC  
CCCACCCCTCAATGATGAAAAAGAAAAGACGAAGCTTTTTGTCTTGTCTTCTCACTTCT  
TAGATCCTAGACACCTGACATCTTTTTCTTTGCTATAAAACCCTTCTCTCCCCACCT  
TCATATCATGCATTCTCACCCCTTCAATCACCATAAACAACCTTCTCTGCCTAATTCTCT  
>Glyma07g03390 | Gm07:2378090-2379589 FORWARD

TAATGTTTACAATAAAAAATAATCATTAAACAATCGTTAAATATTTTCAAGTATTCTTTT  
CCTAATAGTATTTTATTGGTTTAAATGTTATTAATTTGATCCTCCTAAATTAGATTTTA  
TATTTGGATAAAAAAATAGCTAGTTTTTTTATATAAATAAATCAGTTAAGATTTCTAA  
TAAAATTAATGATGAATAAAATCTATAAATATTTGTACCTATAATAATAATAAAAAAC  
AGAGTTGTTAATTCACTTAANNNNNNNNNNNNNNNNNNNNNNNNNNNNNNNNNNNNNNN  
NNNNNNNNNNNNNNNNNNNNNNNNNNNNNNNNNNNNNNNNNNNNNNNNNNNNNNNNNN  
NCCTAGACGAGAACTCTTCTTAATTCCTGTGCAATGCGCGATGCATCAACAATTTACCA  
AATATTCAAATTTGTACGCGTTGTGAAAAGTCACCCAGCTAACGACATTGTGCGAGACCA  
GACCGGACAACATCATCAGTTCTGCGAATCGAAACGAGTCGATCCCAAAGTCGTGATTCT  
TCTCGAAATAGATGCCCTGGCAATGCAGCAACTCAACATAGTCATGGGTGTGGGCGTAC  
GTGCGACGTCGAAATCTCTGAAGTTGAATTCCAGATGAAGGCGTTGGAGGTGCCGAGGG  
TGGGAAGATTTCCCGCATTGTGCGAAAGGGTGAGGCTGATTTGGATCAGGTGGAGGCGAT



CACGTTGGCTTTGAGCACGACATAGTGTGCGGCGGGTTGACAATGGCGGAAGGAGGGGT  
CGCAAGCGTAGGAGCGTACATTTGGAGACCTCTCAATCCGGTTGCCATTATCAAATCCGG  
TCAATTTAACTTTTTTATTATTAATCAGACGGACATAAATGGTTACTACCTTTTTTCATAA  
ACTTACTTAGGGTGC GAAAGAAATTTGACTTACGCACCCTAGTCTTTGTCAAAAATTAT  
GTTATTTACTTGAAACTTAAAGATTTTTCTTTCTTTGACAATTAATATAAAACCATT  
AAAATAAAACAAATTATTTTGTAGACTCAAATTAATAGGGCGTTTGATTGTGTTGAAAG  
CATACAAGTCTAAGATTA AAAACATTACTATTAAGTAATTTATTTAAGCTATGAGAAAA  
ATATTAATTTATAAGTTTTTTTTGTTTTAAATTTTAAATATAAGAATATTCAAAGTAGA  
AGTTTTATTTAATCAATTTGATTATATTTAATTGAAGCTTAGGAGTAAAGATGCAATAA  
TAGGAGGATGAACAAGAATAATTAATGTGGTCCCTCAAGGCTTTAAATAGTGGTACATAT  
ACAATATAAGAGGAAGGAAGTGAACACAAAACCTGTAAACCTATAACCCCAAGGAAAA  
GAAGAAACAAAGTTGAAGTGAGAAGAGGGTGCTCCATTTAGGGCCACTCTCGAACACTTT  
GATCATCAAATCAATTTAAGTGAATTGGTTGAGTCAGCCAAAACGGGTCTCCCTTTGTGG  
>Glyma07g38310 | Gm07:43090238-43091737 REVERSE

ATTATATATGGCTTTGGTTTTGGTGC GGCTCTTATTATGTGCATTTCAAGAAGTTGATT  
CTACTAAGCTTGATATGCAGTTAATCGTGTGTGCCTTTCTTGC GTGTTTGTTGATTAA  
AGTCCTTAAGTCATTT CAGCATTCTTAAACAAATGTATGAGCAGATGGTGCCTTTGGTT  
GTAECTTAGAAAATTGCTAATGATCTTGTGTAACAAAGTTCTGTGCCGGTCATTTAGAT  
GTTTGCCCAATTTTGTATCCTCTGAGCAAGCATGTAACGTTTTCTCTATTCTGGCAGAG  
AATCACTGAACAAGTTTGCCTGTTCTCTCGGTTGATCCAAAACCAAGAGAGTTACAATG  
ACTATTGCTGTATAACGCGGTGATTGACTAATATATAAAAGGATATTATTACAATCAAAA  
TTAGCATGAGACATGCCACGTTTCGTAACGAGAGAGTCACGCAATATAAATCCCATATTAT  
GATAAGTGCTAACTACTCTGTCCCGCAATAACAGAGAATATCAGAAAATTAAGGACACCA  
AGACCCTTCCAAAAGATAAGTTCCACCCTGAATATAAATCCCATATATACACATACATGG  
ACCCTCGCTGCCTCCCACTCCAATATAATGATGATATTTTGTCTCTATTTTTTTTCAA  
GCCGAATGAAATGGTAAAACATAATGTA AACATGCAGTGA AAAAAAAAAATCAAATAGGAT  
TGTCATAACCAAGTTTTGCAACATGATCCCACGTTTGGATTATGATTTTTATGTGGGTAT  
TGTCACTCTTCAAACTAATTAGAGTTACATTACCAAGAGGCACTTTCAAGATGCTGTAT  
TAACGGATTACATCTTTTCATGTTAAATATATATAGATTTTTTTTTTGGTATTGTTTTCA  
TGTTATATTTAATACGATAATATTGCATTATAATAAATTTGATAATTTAATTTTTATGAG  
TATTTGAATATGATGAAATAATCAATAAAAGATTAATCTAATGACTAAAGATTAAGCTCG  
TGTCTTAAAAAACATGAGTTTGAATTCCTATGTCTAAATGAAGACCTTATTAGTTCTTA  
AAGTATTTAATAAGGTTCTCTGAGTCTTAAATTTGTCTTTGGTGAATTT CAGAAATCT  
AATTCACCATTTTTTAAACAAAAGAAAATATGATCAAATCAGAACATACAATGACAAAT  
CATGGATAAAAATGATATATAAAGATAAACAGTGGTGGGGTCAGTGATTCTGTAAGAAAG  
CAAAGAATAGATAGGAATAAACTAAGACTCTACGGGGCCGGGCAGAAAGAGATAGTAG  
ACGTGCACCAACAGCAACTAGACCTTGGATTTTGCACCTCTATTTCTCATCAATCTCTTTC  
ACGTTCTAACGTGCATTATTTATTTATTTATACCTCCCTTTTGATTGAGCAATAGCATT  
AGTATCGTGTAAACATAACAAAAGTAGTGGCTTGTGTTGTGACTGAGGGCCAAAGGC  
>Glyma20g37450 | Gm20:45340317-45341816 REVERSE

ATCTAAACATTTTCTACCTCCTCGAGAGAAAGAAAATGAAAAGTGTGCCATATTCTAT  
GGAAAATTGTCGCTTTTGGAAATTAATTAATAGCAGTTGTT CATGGGAAGCATCACCCAAT  
CAAACATCGACAGCAACAGCAAGTACAACAAATGCGAGAACAGCAACAACCTTAGAGATAT  
AATGAGTTTCTAGTATTACAATACCATACTCCAGAATTTCTCAAGGGAAAGCGATAGAG  
AAGAAAGATTACACCAGATATTCTATGAAATAACTACTAGTCTAATCCTATATCATACCA  
AATTAGTGTA AATTGATAGATAAGTTAAATTTTTATTATCTGTTACTTAAAACATTCAT  
TTGTAGTTTGGAAAAGACAAAATTAGTCAAAAAAATATCCCAATTAGATGCCCTCTAGAG  
AGTTTCTCTTCCCCTCTCTTCATGACAGCGAGCTGTGAAGCTAGCGAATTGTGTTGCCAA  
GAAAAAAGAATATTGTCCATAAATTGACCTACTTTTCATTTCGATTCTTTGTTGAGTTTT  
TTTTTTAAGAATTCAAAACATAATTTATGCTTTAAAACGTGTAATGATTATATAATTTTT  
TAAAAAATCATTATAATTTTTGTAATTAGCAATTTCTTGTA AAAATCATAACAAATAACT  
ACTTTTTTAATTA ACTTGATCAAATATTTTTATAAGAACTTGGTATGTAACCGGAATAGA  
GTAAAAAATCTTGCTCTATTTTGTCTTTTGGTATTATCCTTCTAGTAAAAATTAACAG  
TACTACTTTGTGGTTTTTATATCATGTTATTTTTCTTTTTAAAATCTACCAAACATAAAA  
AAAAAATTAATGTTGTGTTCCGTCCGTTTTAACAAGCTTATTAACCTTTACCTCTTTG  
GATATAATGATCAGGAAGTTAGGTGAGGTTCACTTTATTGCTTCTGCAGTTGAAACATA

GCAAGTTAAGCTTAGTTTTAGCAAGAATTTACAGGCAAGTGTGAAGTGAGAGGCTTATGG  
TCTTGACTTTGGAAAAGAAAATAACACCTTTACCCCAATATAGGCAAGTCACCACCTAGG  
GTTGAGGAGTGGAATTTAAAATGATAAGCTAGGCTTTTAAGAAAATAATAATGCAAACA  
AGAAGAGATAAAGATGGAGGTAATATCTACCAATCTACTAAAAAAAAGGGAGGCAATAAT  
TACCAAATGAAAAGATGGAACATGAATGGTACGTGGCGTGAGTTTTAGATTAGATTAT  
GGTTCCTATTAATTTAACTATTAGAGGTAAGGTGGCCACAAATGATAGGTTGATGGGG  
AAGCAATGAACAGAAGCACAATAAGTGAAGTACTGACTTTGAAAAGTGTTCCTTATTATAAT  
ATATATATATATATATATATATATATATATATATATATATATTATAAAATATAAATGATA  
GTTGTCTCAAGTATAGAATAAAAACCACACTATAAACTAGGCAGAAGAAGAAATGAGT  
>Glyma02g16980 | Gm02:15322604-15324103 FORWARD

ATTGTTTTCTTTCTTTATTAATGCAACATTTGATGTTTTTTACCAACTAGCCACTTTGA  
TAAGATGAAAATCATACTTATTTCTTTTTCTGTATTCAAATCTTGTGGCAATTACCA  
TATTTTTCTTGTGTTAGAAAGTAGAGTACATTGTTATTCTCTTTCTTGCTCATAGGCATA  
ATTTTTGAGATTCATATAGTAGGTAGAAGTTCGTTGACACCATTTTGCATTTCATGG  
ATGAATGAGAATCCAACAGATTGTATGCTTCACAAATATTTATGCATTTAACACATTA  
TACGGCAAACATATATGGATATATAAATAGTCCATTTTCGTTTGATCATAAAATGGTAGAA  
TACAAAACCAACATGTAGAGTAAGACTCTTTGCTACATCAAATAATTGAAATTGCATT  
ATTCATATTTTGACCCAACACAAATGAAATAAATAGAAAATTTGTATATATCACCAACCA  
CACATTCTTTATTTCTTCTGTCTATCCAAAGATAAAGGCTATATAAGTGCCAAAAGTGGTA  
AATTTAATTTCTATTTAACAGGGGGAATTGAAGTATTTTATGGGTCATTATAAATGA  
TATGAATTATTCTTTAAATTTAGTGATGACTAATTTTTGTCGAAAAATTTAATTGATTAT  
TTTTATTGAATTTTTTTTTCAATCATGTTTTTTTTTTCATCCACCATCGAGATCTTATT  
TTAATAAATATTACTTGGATTAACAACCTAATGGTAGAAAAAAGTATCATGTCTCTT  
TCATATTTTTTTTTAAAAAAGGGAAAAAGAATGAAGGTTAACACAAAATGAGAAAT  
AATATAAGAAAGTAATGAATAGTTTCTAGAATAGTTGAAGGATAACATCTGTCAAAAAA  
ATTGAAGTATATGATAGTTTTGTAATCCTTAAAAAAGAGTTTTGTAAAATGTACACC  
CGAAAAGAAAACCTTTCTTTATTTTATTATTATAGATTGTAATAAAGCTAAAAGTTAA  
AAAATATTTATTACAAAATATATAATAAAAAATGCATTTTAAAAGGAAAATGCAAAACT  
ATAGTTACTGATTAATAATTAATAATTTTTTATAACTTTTCTCAATATATTATAAAT  
ATACATATATTTCAATATTAATATTAATTATTATTACAGGGCTAAATATTTATTTTTA  
AAAATATAGTTGCATTTAGTTTTACCTTTAAATTTTATACTATTAATTTTATATTTTCA  
TAATTTTAAATATTCTAAAATAACTTTATTGCCTGTTTATAATAACGTGACAAATATCC  
ATTAATATCACATCACCATGAATGATTGAGAGAAAAGCATTTTAAGAGAAATAAAATTG  
ACGAGAAAGAAAACATAAAAAGAAATTTAAAAGAATTAACCAAAATTTAAGTGCATTG  
ATTAACGTTAAAACACATTATACACGATATTTAATACTGCCATTCACGAATAAAAAGCG  
>Glyma19g33420 | Gm19:41051403-41052902 REVERSE

CTCATCCATCAAACAGTCAAACCTCCGGTGAGAATTGAAGATGTTGGATGCCAAGAAACT  
GCTTCCGTTATGGTTAAAAGCTTAGTAAATTTATATAAAAGCTTAGTAAATTTATAT  
AAATATTAGATTCAATCTTATGCATATTGTTAATTAGAAATTATAGTATAATTTT  
TAAAGTAATTGCAAAAATTAATAAATTTACCATGTTAATTTGTAATTCAATGATAAT  
TAAAAAATATTTACATTATTGGTTCTTAAATTATTTATTTAATGTTTATTGATAGTGAA  
AAAATGTTTTATATTATTAGTAGATAAATTATTTACTCAATGTTTATTATTGTTTTATT  
TAGAATTTAAGTGCATGTTTAACTTAAAGTTGAGAAAATCTAAAAGTTATTCGTTGAGTA  
TAATGGAATTCGTTAGTGTATTAGAATTTACAAAAAATACTTTTCAAACCTTAATTCAA  
CACAGTCTTATCCCTGTCAACAAAACAAAGAATGAGGTAGAATACTAATTCATTTTCTT  
GAGTTATTTTCTATTTATAAAAAAATTGTTCTTCAAATAAATTTAAACCAATCAATT  
AAATTAATTCAAATTAGTTTGATTTATTTATTTATTTTTCTTTAAATTGAAATCAAATCA  
TCTACAATCAGTTCTACTCTTAATTTTTTAAACACAGACATACTTAATCGCTCGATAATT  
TTTTATAATAGAAATTTATACATTTTAGATTCATATATATTATTTATTTATTTTATCAT  
ATTTTAGATAAAGAAAGATATAATATGTTTTATAGAATGAGATATATAAAGTTACAGTTG  
TAAAAAGCGTACATTAATTTATTAATAAAGTGTATATTAATTAAGAATATGAATACC  
TAAAACCTATTTAAGTATTTTTTAAATATTAAGTGTAAATAGTTTTTAAATTTACAAT  
AATATAAATTCAACTTTTATGTAATAATGAAATGACAGAACATAAATTTTAAAAACAT  
AATATTTTTTAAATTTAATTAATAACCCAAACCAATCAACACAATGTTAATTGATTTT  
TTTTAAAAGAAAAAGGGGAAAAGCCACAACACTGTGTTTATTGATGTAATTTAATTTAAT  
TTGCTGAAAGTTTTAAACATTAACCTAAATTAATCTAATTAATATGTTAAATTCATT

TTTACTATTTTACCCTAAAATTCCAAAAAGATCAACCCTTCAGCCTGAACTTCCACAACA  
AAAAGGGGAAGAACTTTACATAATTTTGGGTACTAATATTGGTGAGACAAAACCAAAGC  
AAGCATGTTGACAATCACTGAGGAATCCACGTGTGCCTTTCTCTCCTTCATTGGTAGCTG  
AACAAAAACACACGACACAACAACGTTTTTCATTTCCATTTTAGTTTCAACTCAAACCCC  
TTCCAATTCCAAACTCAGTTGTATTCCCTCTCAAATTGAACTAAATCAAACCAAACCATC

>Glyma15g01010 | Gm15:614170-615669 FORWARD

AAAAGCCTAACACTACATGTTAGTTTATACATTGTAGGTAACCTATATACAGCTGTAGTA  
TAAAAATTACACATTGTTAGTTTTTTTTTCTTACTGAAAATAAATTAATTTGTATTTTCA  
ATTGAGCTTTTCATTACAATTATACATAAAAGGTCATTAAAATTAATATATTTTTTATTA  
TAAAATTTGAAGATAAATACTAACAATACACACTTTCATCCCATCATTAAATTAATTT  
ATTTACAATCATATAATTATATAATCTCACTACTCTTATTTAACCAGCTTCCACGTATGA  
TTGTAAGTTTGCAACAAATTTAACCAACATCAAATGTTTCATCCCATCTCAAATATAT  
AAGTTATAAAAACTAATTTTCATTGATAAAATATATTAGTTAATTTTATTTTTTTATTCA  
TAAAAATAAAAAAATAAGTATAGAACCAAATAAATACTAAATCCCAGGAGTGGGTGCAGAG  
AGTTGCAGGGAGGAGAGAGGCGCACGCGAAGGGAGGGGATCAGAACAGAAAAGAAGGT  
GAGGAATTGTAACCCTAAAACACCACCGCCTTGGCCTGGGGGCATGTATTGTAGAAAT  
GTGGTCCGGTAGGGTAGATACCCACATTCACCTCGATTACTCCCACTCTACTGCATGCCT  
CCTTCCTTCTTTATTTAACACCCACAGGCCACAGGTACAGGTATATACTACTAACACTAA  
CTTTTAACTACTTTTAATTAGTATTTTTTTTATGTAGTGTCCGGTATTAATGTTTATTTA  
TTTATTACTTCATATTTTTTTTATAAGATTTAATATATTAAGCTAATTTATCAAATTATA  
GAAACAAGTTAATTTAGTTATTTATCATTTTTTTAAATTAAGACCTCATATTTAAGGAAAT  
TTTTGAGAAAAAATATTTTTGGTCCATGTTCTTCCACTTAAATTTAGTTTTGGTTTCTAT  
AGTAATTTTCATCCAATAAATTTAGTCCTTTAACTTTAAAAAATAAATGGATTTAATTTA  
TGTTTTAAATTTTTAATATTTAATGATGATTTTTTTATCGTCCAAAGTTGAAATCAGGTTA  
AGTTTACATATTTTTTAAAGTGAGAAGACTAGATTAATTCCTTATGAGAAGTATTGGATAG  
AAAATTTAATTTGATTTTTATAATATTAATGTTAATAGCTAAATTAACCTTATAAATTAAT  
TAATTGAGATTTATAAAAAAGACTAAAATTGTATTATACTGTACTCGTATCATAAATCTA  
ACATGATTTTTAATTTGAAGTAAGTATTTTTTTATTTATTAATTAATATCTTAACCAATA  
TTCTAATCATAACTACTGGTATTAATTAATAAAAAAGAGAACCTTTTTAACTATCTTT  
ATTTTTATTTTTGAATTCCTTAATCATGATTCTGAAAAGTACAAAGAGTTATAAATTTCTG  
TTGTGTGGCTGTTCGTCCTCGTGGAAATGCTTTAATAGGAGTATTAGCATTCCCGTGACA

>Glyma08g22720 | Gm08:17236246-17237745 REVERSE

TTTTTCTCGGGAAAGTGGGAAAAGGTTTCAAAAAACACAGATATATGAGAAAGGTGAAT  
CATCTTCATAGAGGTTAATAGCCTTTGTCACCACCACAAATATATAACCATAAAAAGAAAA  
AAAGCCACGCCCGGACATCAACATCTTTTGTGAAACTGCATGGCTTTGAACTTTCAACCC  
TAGCTTGCTTTATCATGTGCATGCCAAATTATATACATGTACTGCATCATTGTAACATA  
TTATTTTCTCAATAAGTGACCAACTACATTATTATGCAAAATTGAACGTGAACAATTAAC  
TAGTACTAAATGTATAAATTAATTTACCTGTATTAAGCACTACTATGTAAAAAATAAAT  
GATGAGTGCACAAATAAATATTCTATAAAGTATATGAGGGGAGTGGTGGTACTGACA  
GGTTACCGGTGACGGTGTGCGGGTGGGAGAGAGGCAGCATTGTCAGAGGACAGGC  
GCATGCTAAGTGACCGGTAACGGGGACAGCAGGTTGGTTCCATACCTCCACTCCCAACAC  
TTCCAATTCGTCTGCGAGTATGTAGGATGGTCCGGGAGATAACACACATTCACCTCGATAA  
CAATCAAACCTGCACGCCCTACCCCATTTTTCTTTTTGCATTTGTTGTAGCTAGATTT  
TAATAAAGTTGCTTTTATTAATTTGTTGAGTTTAAATGTAATAACTACCCTATTATTATT  
TATTTTTAAGATTATTATTATAAAAATTAATAAATTTATTATATATAATAAATTGACATT  
GGACGAAGATGTATAACTTTTTTTTCTTAGTTGTTACCATATTTACAGACAATTATTTAG  
AATAACATTGTGAAAAAATACATTAACAATAATTACGGTAAAAATAAAAATAGTTTCATA  
TACAAAACCTATGCTATTTAATTACTTGAAAACCTTTTTAATTAATATTTTTCTTTCTCT  
TGAAAAAATTAATTTGACCATTTAAAATAAAACCATTAATAAATTAATTTCTGTAGAATC  
AAAATTAATGAGGCGTTTCGATTGTGTTGAAAGCATATAAGTCAAAGATTAATAATATTAT  
TATAGTAATTTATTTAAGCTATCAGAAAAATATTAATTTCTAATTAGTTTTATTTTATT  
TTAAATTTAAAATAAAGAATACATTAAAACTATAAGTTTTATTTAACAATTTTACTAT  
ATTTTAATTTGAAGCTTAGGGGTAAAGGTATGCATTAATGGGAGGATGAACAAGAATTAAT  
AATTAATGTGGTCCAAGGCTTTAATAGTGGTACATGTACAATATAAGAGAGGGAGGAAG  
TGGAACACAAAACCTGTAACCTATAACCCCAAGAAAAAGAAGAAGAAAGAAAGTTGAA  
GTGGTTGAGTTAGCTGAGAAGAGGGGTGCTCCATTAAGGGCCACTCTCATCAAACACTTT

GATCATCAAATCCATTTAAGTGAATTGGTTGAATCTGCCAAAACGGGTCTCCCTCTGTGG  
>Glyma13g28390 | Gm13:31420237-31421736 FORWARD

AAAGCTAATGTTGAATTGGTGATAAAGACACTTGGTGGGAGCATAGCCTTCCAAATCTCA  
ATGGTCATGGAGTATATAATGGAGAGGAAAGGATCACAAAGAATCCGATTAATCAGAGG  
AATGAGAAAGGTGCCCATGTTTTGTGGTCTAGTGTCCCAAGAGATGCTGCTTAGCTCA  
AGCTCCAAAAGATTCATGCTCCTCTAAGTGCATTGTACCTTGCAGGTGATGGCAACAGCC  
ATAACTTACAATATCTTTTTTAAATCTCTATCTTTCCTTTTCTTTTCTTTGTTATTGCA  
ACGAATAGTATCAGATTGATTGCAAAAATAAATTGACTAATAGATAGCAGTGAG  
AATAGTCATTGTTAGAAATATTCTGAGAAAGAAGATGAAAGGAATGTTGTGTTGTGGCAA  
CAACCATTGTCTTGAAAGTAAATTTTATGATGGACCTCTAATACAATCTGATATTCGGTAGC  
AACATGTTCCATTGGAGGCCAAAACGCGTTGGGGTCTCAAAAATGCTCAGAAGAATATAT  
AGTAGGAGAAAAGTATAGAGAAAATAAAGTGGGAAATGTTGAAAAGTAGAGAAAGGTTAT  
TGACTTATTTGGTAATCAAATTCACATTCTCATTCTAATATAGTGCACATGTAATCAA  
TCTGTTGGCAAAGATTTAAGAATAACTTTTAAATATTACAGAAAATATATGGATATGAATA  
ATGGAATAACTTTTTTTTTATGTTTTTCTTTCAAAAATAAATGAATAATGGCTAACAAA  
TCCATTTGAATAAAAAAATTGTAACCTCAAATATGGCAACAGTAATAAAACAATAAATA  
TGCAACACTAACAAATTAACAAAGAAATGATTAACACATAAATCCTAAACCCTAAGTACG  
AAAGTAAATTAATACGAGTGGTTAAGAATTTAAAATTAACTTTCATTCTTTTCATGAATG  
TAGATTCGACTCTATATATGTGGTGCTACTAAAATCTTGCTCAATAATGAATAACTTTTA  
AAATAAATATTCTAAAGATTAACAATAATGGAAGAACTTAAATATATATACTATCAT  
ATCACCCTGAATGTATTGACCAATTGATATATAAATTGTTTTAACTTAAATAATGACATT  
AATTTCAAGTCTTAAATATATTTTTTTATTGAATTTAAGTTTTACCGTTATAGGATTATG  
TAAGTTTACTCAGCTAAATTGCTACTAATAAAGTCTAAGATAGTATTTGATAAACTAAA  
TGAAATGAAAAGTGAATTAATAATGAATTCTACCTCATTATATCATTCAATTAACTTT  
TTTTTTCAATTGTTTTTCACTCTATCAAATGGAGGATAAGATGTACTAAAAGTTTAGA  
ACATTTAGCGTGAATATTATTGGTACAAGTGTGAGAATGGAGGGATAGAGCCATAGAT  
GAGGCGGGAATGAGTAATGTGTAACAAATAGTTAGGAATGAATGCTATAAATAAGAGAGA

>Glyma15g10660 | Gm15:7747307-7748806 REVERSE

TCTTTCTTTTCTTTGTCAATGCAACGAATAGTATCAGAATGATTGCAAAAAATAATTA  
AATTGTAATAACAGAGAGCAGTGCAAATTGTCATGGTTAGAAATATTGTGAGAAAGAAGA  
TGAAATAAATGTTGTGTTGTGGCAACAGCTATTGTCTTGAAATTAAGTAAATTTGGATGG  
ACCTCTAATACAATCTGATATTAGGTAGCAACATATTATATTGGAGGCCAAAACACGTTG  
GGGTCTCACAAAATGCTCAGAAGAATACATAGTAGAAGAAAATATAGAGAAAATAAAG  
TGGGAAATGTTGAAAAGTAGAGAAAGGTTATTGGTCATCAAATTTACATTGTCATTCT  
TATATAGTGTACATATAATCAGTCTGTTTACAAAGATTTAAGAACAACCTTTAATATTAC  
AAAAACCACACGGATATGAATAATGGCTAACAAATCCATTTGATTAATAAAAAAATGGTA  
ACGTCAAATATGCCGACAGTAACAAAGCAATAAATATGTCAACACTAACAAAGAAATGAT  
TAGCACTAATGCGCCGTATTCCAGTAAAAAAGCACTTATGCGCCATTCTTTTACA  
GTTATTATACCGTACTAAAATAAATGATACATGTGGTTAATAATTTAAAATTAAC  
CTCATTCTTCTAATGAATGTAATTCGTTCTATGTGATCGCCTTTAAAATCTTGCTCAA  
TAAATAACTTTTTAAATAAATATTCTAAATATTAATAATCTTAGGTTTTATATATTATCT  
CTCGTCTTTTTATAGAAAGAACACATATATTATTACCGAACATGTGAATTAATTCACA  
TGTAATTTTCAACTAAATTAATAAATTAATTTAAGCCTTAAATATACATTTTTTTCAT  
TGAATTTAAGTTTTACACTTACTGTAATTATGTAATTTACTTCAGCTGAACTGTGACTA  
ATAAAGAATATCTTTAGTCTCTTAAAAAAGACTAAGATGTATAGTAAAAGTTTAGA  
ACATTTAGAAATTTATTAAGTAATTTCAATTAAGCATAAAAAAATCAAATCAAGACAGA  
TTAATCCAGGTACCTATACTCTTATTTCTATTTAAAATAATTTCTTAATGTATTGGTTCC  
GTTCCGTTGCACAAAATAAAGCGGAAAAAGAATGAAATAAATCGTAAACGAGATAAAAT  
TCACATGTTTACACCTAAGTTTTCAATTTGAATTCACATTGATTCTATTTAAGGTGTGAT  
ATTATTATTGGTAGAACTAGAACAAGTGTGAGAATGGAGGGATAGAGGAGGCGGGAATG  
AGTAATGTTCAACTAATAGCTATAAATAAGAGAGAGAAGTGGTAGTGGGGTCCGTAATAG  
TGCAAGAAAATAATTTGCTTCTCTCTGTCTTTCTCACAAAGGTATCCTCTTCATTTCT  
GCTACTCCTTGATTGAGCAATAATGTTATATATAAAAATATTACTATAAGGTAACATAAC

>Glyma07g01840 | Gm07:1226063-1227562 REVERSE

GGTTAGTCATTTGTCAATTTTTAATAAATTACATGACATCTAAGTAACGACGTGACATT  
AATATGTTAATGTGATAAATGAAGTGACAGTCTAGCATGAACGTTGATATGGCATCGACA

ATCCAAATTTTGATCCCTACGGTTATGTCAACATATTATCAATGTCTTGCGAGTACATGT  
GTTATATTGACAAGTCATTGCGCACATCAACATATTAGTATCATGTCATTATTGATGTGCG  
CATAAACATTTTCCATTAAAAAATTAACACAACTAATAATAGATCAAAATTGTTAAA  
TTTTAAAATTTTGAAGAGCAAATGTGTAATAATTTTTTTTACAAAATTTTACAATTGT  
AAAAGTGTGTAGACCAAAAATGGATTTGAGCCAAGATTTTACCTAAAATAATTTTTTTT  
AAGGAAAAAATTTTTCTATGACATATTGCTTTGTTTCCTTTTTTTTATTATACATGT  
GCATATATATTTAAGGAAAGATGAATGATATTCACGGTTTCTTTTTAACATTATCCATG  
TGACTAATTTTTTTAAAAAATATTAATTTTGATGGATCACACTTTTAAAGTAGAAGA  
AATAATCTTTAAATGAAAAGTATGACCCATCAAAATTTGTGATCTCCAACAAATTTTAAAT  
CAATCACAAATTATTGGAAAGAGAGTATCAATGTTATTTTTCTTAAAGTTATATAGAC  
ACTTAATATGTTACTCAACATGTAATGAGAGAAAAAATATAGATATAATGTGATAAG  
AAGATAAAGATAAAAAAATTAAGTGTAGAGGATGTTTAAAAATAAAGATATTTTTA  
TATTACTACTCACGTTTTAATTATTTGCCTTAGAATGACGTGTTACTATACAAAAATAA  
CCAAAGTTTAGATATTAATAAAAAATCATTATTTTATAGCGGCACAATTTTCTGTGCA  
TTGTGACTTTAACCTTTAAAGTCCACATAACTTGACCAATATGGCCTTAGATACAGCAG  
ACATACAAACCACGAAATAAGTATAAAAATTTGACAAAGTAGGATATTTTACCTATAA  
TTACAAAACCTGTTTTCAATAAAGCGCAAGGACGTAATCCATCAATTTCCGTATATCCAT  
CCATGTGAAGTGTGAAGAAAATATGATGTTAGTGGTGATATATAATAAAAACATTCAAA  
CGTGCAAAATACCATTCAAGAAGATACTCTTCCCCTAGTGCTTACGAAGTGCCCCTTTCC  
TTGACACGATTTCACTCTCAAGTGCATGCAATGCAACATTTCGAATTTGCCACCAGCTGCT  
CCACCCCTCAATGATGAAAAGGAAAAGGCGAAGCTTTTTGTCTTGCTTCTCACTTCAT  
AGATCCTAGACACCTGACATCTTTTCTCTGCTATAAAACCCTTCTCTCCCCACCTCCAT  
ATCATGTTCAACCACCATAACAACCTTCTCTGCCTATTTCTCTCCACTTCTTCTTCTCT  
>Glyma10g02820 | Gm10:2014142-2015641 REVERSE

AAAGAATACTAATTTCCAATCTATTTGTTTAAAATTGAAATACAATATATTTATATTATA  
TTTTAATATTCATGTTTAAATTTATATGTAATAATGAAATGAAATCATACATTTGCTAACGA  
AACTTAGTTTTAGTTAATTGAATAGTATATGTAAGTTGTTGGAATTTCTTATATAGTATC  
TAAGTTTGATTTCTGTGTGAATAAAAAAACAACATATTTTCATCCTTTTTAAATCTTG  
TGAAATCAAGATATATAGATATAGATTGTTTGACACACAAAATTAGTTAAACAATAGTAT  
AAGCAAACCTAAGCAACACAAGGTTGTTTATATTAATTCATCTCTACCTATGAAATTATGT  
CATTGTGTCAGTTTTTTCATAAACTATCAAGTTTACTAACTTCACAAAATTATAACTATTA  
TTTAGGAAGCTACTGACTCAACCCTAAGTATTCTTTACACTTACCTTTGAAAGCAAACAA  
CCCACCGCATCTCTTCAGACTTTCAACAAAAAATAACAAAATATTTGGTTAAGGGT  
AAAGGTCCACTCACTATCTATCATCTTATAATATAGACTTACAAATGTAAGTCCCGGTCT  
TTGTAATCAAAAGTTTTACTGCTTACACAAGTGAAGTTCACAAAGTTTAGAGCTTAATAG  
AATGGCCATTAACATCTTTTAAAATTAGTCTTTTATGTTTTGTACAAGTACTCTCTGATA  
TTAATTTTAGAACTTCTTGAAATGTAATGTTATATTTCTTTATTAAATGTAATATTTAA  
TTTTTTTTACAACTAATCACTCTCATAAGATAAAACATCTTACTTATCTCTTTTTCTT  
GTCCTCAAAACTCTTGACGCAATTAACATATTTTTCTTGTATAAAGTACATTATCTCT  
CTTTCTTCTCATACCACATCTTTTGACATTCGTAGTAAGTAGAACTTTTTATTGACATT  
CATTTTGCATTTTCGTGGATGATTCTGAGATTGCAATAGATTGTTTGCTTCGCAATAAT  
GTTCTTGCATTTAAGACATCATAAGACGATGTTTTAGTCTGATGTGCGTTTGACTTCAA  
ACTCCACATAAAAATTGTTTTGGTAGAATAGAGAAGTTCAGCATGTAGAGTAAGACTCTTT  
ATGACATCAAAATAATTGAGACTACATTATTCATATTTTGTCTAACAAAATGAAATAA  
ATATAAATTTGTATATTTCTGTCTAAAGATAAAGGCTATACATGTGCCAAAAGT  
GACAACTTTTTTTTTCCCTCCAATTATCAGGG

>Glyma07g37220 | Gm07:42357045-42358544 REVERSE  
ATTTTATAAGAAAAACACAAATCAAAGCCTATAGGAAGCAAAAAAAAAAAAAACAATGAAA  
TGAAAAAATTTATCAACAAATAAGAAATGAGAACAGGAGATAAGAAAATGTATTAAAAAA  
AGTGAAAATATATGATAATACAAAATTTCTTATCCACTCACATATGTATAATATATAAAAA  
TAAATATGATTTAATAAAAAATATATTGAATACATTTTTGAATCAAACAATTAATATATT  
TATCGTATCAATTAGTTAAGATTTAATAAAATTGTTATGAGAATGATAAATAAATCTT  
TAATTATTAATTAATTTGAATCAATCAATTAATATAAGATTTAATGGAAAGATTAATCG  
ATTTAATAAAAACAAATATAAAATATGTATTATTTTATTGAAATATTTAGAAAAAATAAT  
ATGAAATTTAATTATCATAAAACGTTTTATATAATAAATTCTAATTAATGATTATATAA

AACGTTTTACACCATTAATGTATAACTCTTTTTATAAAAACGCATTACATCAAAAACAC  
TAAAGTATTTAATTATCATATTAAAAACTTTACTATTTAACTCCTTAACCTATGTACAT  
GATTA AAAATGTGTTTCCTTACTCCTGTAAAAC TATTATTTCTATCTTTGGATGTTTAA  
AGTGATTGCACCCGAAAAAGAAATATTTAATAGAAATATAATTTGTTATATTTAAACTA  
AAATGTTCTTATTTAATGTCTTGATCTTTTTATACTCGCACAACGGGTAATAGGTATTAAC  
TAAGGGTATCTTTGATAAAAAAATGCATTAATTAGCTAATGAAACCAATGAACATTTAA  
TATTTTTTATCTATATTAATAAATAATATTAGTTTTCAAATTAATAACATAATAACTAT  
TTTATTTTTATTTAATGCTTTCTATTTTTTTGTTTTCCCATCAATATCCTACTCCTATGA  
TTATTAGTTAACCATACATGCTTTTAAAAAATATGCTAATAAGTTATAAGTTATAATAAA  
ACAATTGAAAATCAACCTTTTTTAAATATTTGGTCAACATAAACATACTAACATAGGTAC  
AGTAAAATCCAAAACCTTATAGGTGAGCTGTGTCGGAAGTGTAAAGATTTAAGATGAGGGG  
TTAGTTCCTTCTATGAATGAGCTGGATCCACTCTTTCAGGAGCCAGTGATACCCAACCTT  
GAATATATACTTCTCTAACTTCTAACGTCACAAATAAACAAATAAAACCACAAC TATT  
ATCATAAAAATTACTACTATTACAATAAAAAATATTTACTGTATAACATTAATTCCTTG  
TTTTTAAAAAATTA AAAACACCCAATAAGAAAAACAATCTTCCTTAATCCTACCGATTA  
GTAAAGCTTTTATTGCTATTAATTAAGAATAATTAATGCCCGAGAAATTCAGCGTGTA  
ACAGTGACAAGGCGAGGACATAAGCTTGAGGCGCAGAACAATAGTTATTGTTTTATAAA

>Glyma05g01730 | Gm05:1209130-1210629 REVERSE

GTCTCACTTTTTACACTTTAAGGACTAAATTTTGTATTTTCATCTTACATGGATGTATTT  
GTTAGCGAAATACACATTTAGGGACAAAATGACTATTTACCCAATAAAAATAAAGAAAG  
TGGCATTGGCATTACCAAGTCAAACCTTAGCATTGTGAAGTTGCAACAAGAACAGGGACA  
CTGACCCCAAGCGAGATACGTTTCGCCTCCTTGACCGTGACCAACGTTACTATTTATTA  
ATGACTTAAATATTTTCATATCTCAAAAATAGGTTTTTTCAAGTTATTACCTTAATTTTA  
CTTTTGATTAATTATATATATGATTTTTTTTTATGTTTAGTCTCATTCTATTAACTGATG  
TCACGTCATCAAATCTAATCATTTAATATGTAATCAATTTGAAATCATGTCATTATTTAT  
TATTTCAATTTATTTTAAAATTGAATTATTACGGTGAGGTCAGTTTCATTGGATTTAT  
TTTCTCCGTTACGTGTTTCGGGGCTCAGACAAATCCGTTGTAGCGCCAACCTCGGTGATGGG  
CACGCAACAACATCGTGTTGGAGAATGAGTATAAAGAGAGAGACAAAATGCATTAATGAA  
GGTCGGGGTTTTCTCAAATCTCAATAACCCCTTCTTTGAAACCAAAAACAACGACGCATT  
ACTTCACTTTGATGTGTCTCATCGTTTCTACTTGTGTTGTTGTTGATTAGGCACATTCA  
CTCATTGACTCACTTGCTCGCTTGCTTGCAACCACACCCTTGATTTTCATTCATGGCTTC  
GACCACCCTTTCTCCTTCTACACATGACTTGTTGCTGCTTGCATGCTTGTACGTTGTA  
CGTCGACTGCACCAGAACCCCTCACGCAATGTCCCTCTCCTCCAAGATTTCTCCGATTTCT  
TATTTTGCTTCTATTGTCACAGGCAATGGTTTCGAGAATTTAGTTTAGGAAAAGGAGTC  
GTCATAGAGGTGAATCGCAGTGGTGGCGACCAAAGTGATTCCAACATATTGGAGATGTAT  
GGTGACTATAATGAGGAGCTCTCTATGACTACGTTTCGATTCATCGGAGATTATAGGATTT  
AATCATCGTTCAAAGAGTCCGAAAGGAAGTGAAGTGAAGTGAAGTGAAGTGAAGTGAAGT  
TGAAAATAATAACATGACTTCTTAGATTTAAGTGAAGTGAAGTGAAGTGAAGTGAAGTGAAGT  
GTTTATACGTTATCACTTAACAAAACCAAAAATACCTTTTTTTTTTAAATATATAATT  
GAGAAAAAATAAATTTTAAATAATAACTTAAAAACAACATAATTTTTTAAATATGAAAATC  
ATATTTAAGTCTTTATTAATTA AAAACAAAATATGTCATAATAAAAATAAGATTTTGATAT  
TGACGTGAGAAGAGACAAGTGGAGGTGGCATAATCGCTTGTATGATGATTTGCAAAGATCT  
CTCAGATTTGGATCTCCGAATCTATCGTCTTTATTATTTTCTGTAACCCTTACTTTTC

>Glyma03g28570 | Gm03:36492239-36493738 REVERSE

AAAGTTAACATGTTTACGGTTTTATTATAATTTTGTATTTCCGAGTGTATGCTTGTGCTG  
TTTGTTAGAACAGTCGTCTTAAACAAGTATGTTTCTTCAAGGATATTAAGAGACATTTTT  
CTTCTTTGAGTCCGTTGAAACGCATGTAACAAAAAATTAATACTAAAATGTGCGGCA  
AATTTATTGCTACTAAATTCAGCCAATGACTTATGAAAGTCCTTTCATTACCATCTTCCA  
TTGATATTCAAAAGGGTCTGAAATAAATCATAGTTTGTTCAAATTTTTAAGTATTTTAGC  
TACATAAATGATAAATTGCATATAAAAAAACTTCTATAATCAAACCTTCTGATGAAGTTT  
TTTATAAAAAAAACACAAATGGTATAGGCTGAGCATGACCCCATGAATTGGGTATTATT  
TATTTATTATTTATTAGAAGCTGATATGGTAAAAATAAAAATAGAGGTTTTGATATTATTA  
TGTTTTAGGTTAATAGTTTAAATGAGTTTGTGAGCATATTAAGAGAAAGAGAAAGAGCGATT  
TATCATATGAAAACCTTGAAGAAAAAAAATCATATGAAAACCTTAAACAAGTATGAGTGTG

TCTTTGATTACGAGATTATATAATGCACGTATATATTATCTTGTTTTATTTTTAGAAATA  
AATAAATTCTTATTTCCATATCAACGAGTTCACATGATGTGATTTTAGGAAATGTGTATA  
ACATATGTCCTATCAAATGCAAATTTAATCACATATTTGGACTGTCGTTCAAACAACCTCC  
AACCTTTGTTTGATAAAGCATTTCCTTCTTTACTTTTTCGATGGAGGAGTATTAGACTTT  
GAACTGTTGTAATTCCAATTACAATACAAACATATGCAAAGTTAATTTGAGAGAAATTA  
AATTTAATCTTTTAAGTAAGATATTAGATAATCATTGATGTAGCCAATAGATACTTTGC  
TCATATAACAAGCCGCCAAAATAAAAGTATGTGAAACTCATTCAACTATTAATAATAAA  
GAAATGGTAACAAAAAAATCTTAAATTTATGTGACTACCTTATTTGTTTTTTGGCTTT  
GAATAAAACAAAATTAGTTGGGTAAGTGGCTCAAATAGAAAAAAGAGTGGTGGATGGAT  
GTGCATGACATGAAAGATGGTTAAGATGCATGAATTAGATAGATGGATGGGCATGGGAAG  
CAAATCTTAAAAGGGAATCAAAGAAATTGGCCTCTCTTTGCCACCACTCTCCCCACCT  
GCCAAGATATGGTAAGCGCCACATGATTTACACCCAGGGGAAAATAAAAAGGCACCAT  
TGCTGACCTCACCTGTATCTCTTGAAGGATTTTTATGGCCCACTTTCTCTCTCCTCTC  
CCTCTCTCTCTCCTCTTTTGCCTTCATCCTACTTTCTAATTTTTTACATCCCATT  
TTCTCTCACTTATGTTGTTATACATATAAATAAAGGGTCACCTCCCCTCTCTCAAC

>Glyma14g13320 | Gm14:12642628-12644127 REVERSE

TTGTTTTTTGGAAACAAAAAGAAAGCATTATGGTGAAAAAGAATATTTATTTTCTTCTT  
TGGGATGATTTCCATCAAATCTCAAATAAATTATAAATCCGTAATTTGAAACAATTAATT  
GTTGCCATTTAAGAAAATGGAAGATAAACACTAAATTATAGAAAGTGCAATATTAATAGA  
GATTACGAATACATAATTTTCTGTCAATTAATACAGTTAATTTACCCTTTCTTACTAAT  
TTGGCAATCAATGAAACCACATAAAAATAATAGGCCAAAAGAGGAAAAAAAAGTTATTGT  
ACAACAAGTAGCGGCCGTGGCTATATATATATATATATATATATATATATATATATAT  
ATATATATATATATATATATATATATATATATATATATATATATATATATATATAT  
ATATATATAAAAATTTTTTTTTTCTCTTTTTANNNNNNNNNNNNNNNNNNNNNNNNNN  
NNNNNNNNNNNNNNNNNNNNNNNNNNNNNNNNNNNNNNNNNNNNNNNNNNNNNNNNNN  
NNNNNNNNNNNNNNNNNNATATATTTAGTGACTACTTGCTTTCTTCTGCTTATAAGTATT  
GTAATTAATATTAATATACAATAATTAATAAAATATTAATAAATTGTTTTTATTAT  
GTTATATAATTTTTTTCTAGATATGATTTGTAATTATTATTGTTAAAATCAATAATCTT  
ACACAATTTATAACTAGATGATAACTTAAATAGCTTTATAAATACTTAACATAAATTTT  
AACTAAATTACGGTACTATTTCCGGTGATTTCTTAAAAAATTAATGTTTTTTTTTAAAG  
TAAAGGATTTAATAAGTGTTTTTGATAATAGGGGATATATGGTGCAATGTGTTTCTTGG  
CAACAAGATAATGCTATAATGTATCTCAAATAATTAAGGAAAGTTAGTTTGGGTAATAA  
CAGACAGAGAAATAATGAGAAATTAGGAAAAATCGATAATAAAGATAAGATATCTGTAAT  
TTGGTGTCTAAATTCTAAAGGGAAGAATCATAATGTTTCCGTTTTTCTGAGCGCGTGCA  
CACACGCGTCAAATTTTCTGGGAAAATTTTGAATTGAATTGGCGATTTTCTTGTCTA  
ACGAGAAAGGAAGGTCCATCATCACCATCTCCATAATAATTCGGTCAATCTTCACGTTG  
TTAATTCAAACCTTCACTGTACACACACACCACACATTTTAGTTCAAGATTCTGTAT  
CTTTCTATTCAACTGTGCACACAACAGATAACACAATAAATAAATAAATAAATAAATAA  
TTCTCTTTTCCCTTCACTCCTACTTTTTTCCCTGTCAACGATATTCTTCTTAAA  
AATCTTCTTTTCTTTCTTTCTTTCTTTGGGGTTCTGTACGTGTTTCATAGATTCTGTT  
CTGGGGTTTTGGCTTCGAGACCCTTTTGAAGAAAATGACCGTGGTGGAGGATCATAGA

>Glyma02g03140 | Gm02:2438347-2439846 REVERSE

GGAACACACAACTCCAGGAAAATACTACTATTTGCACATCCTACCAGCTGATTGATTTG  
ATCTGCCACTGCCTCAATCTCAAGGCTTTCAGGTTTCAATTACTATAATTTCCAAAAGA  
AATCCATTATTGTAGTTGTGAATTTGATTTACATGGTAATACATGTCACTGATTATCAT  
ATAGAAAAGATGGAATTTCCATTATCTTAACTTTGTTATTTTCTCGACTTTTTGAAAAT  
TAAAATCACTCCATGTCCTTTGACCCTACGCGTCACTGATCTTTTTCATCTTATGATTATG  
AATTAGAGATACTCAAGCTCATTATTAATCAAATAAAATGAATTATTAGCATGCATAAA  
ATATAACTGATCATTTTAATTTTTGAGCTGGCATTGTTTCCAGTCTTTGACCAATCTTCA  
TCAATTATTCTCATAGAGAAAAAATCTTTAATTATCAGTTCCTCAATAAACACAAGC  
TAAAATTAATAAATAAATCAAGAGTTGCAACAAAATCAATTCAAATCAGAACGAAT  
TTTCACTTCTTGATAATGTAATCTCCAACATCAGCATATCTTATACATTGTAACAGCA  
ACATTTTACCACCAAGGCGCATTGACATGGACATAAAAATCAAACAAAAGAAATAAAA  
TAATCCACACGAGGCAGCACGTGTGTGATATCGCTCCCAACAAGATTAGCATAGATACTC

TACACCCATAAATACTCTCTAATTTATTTATTACATCCCCTCGTAAAAGAAAGATGCACA  
CACAAAATCAGAAAATCTTGGTAGCATTAGTTACAAAGTTCTATTTTTTTCTCGAATTAC  
CAAACAAGCAACTGTGAAAAACGACGTCGTGAAGGCGGTTTTTATTCTTTGACTTTGTGT  
CTCCGGTTCGGGAATTTGACGGCGCGGTTTGGTTTCGGCATTGACCCGGGTCAACCCTGCC  
CACTCCCCGGGACTGCGACGTCGTTCCGAAACTCCGAACATTGACCAAAATCTCGCGAA  
ATATCGTAGACGTGTCATTAATGCCTTACTTAGTAGCATAGTTTAGGGGATCAGAAAAAA  
TGTATATCGAGATCACGCACCAAAGTGGATTTTCAAGATCTCAGTGCCATCTTCCAAAAAA  
CATAAATAAAAAGAGAAGATTTTAAAGATTTGATCTTCCAAAAGAGACTTTATTATATTT  
TTTTAATGGAGGAATATGTTAAATTTATTAATGAGAGATTAATGTTAATAATCCAAGAA  
TAAATAGTGAGTAATTACACTAACCAATAAAAATAAATATGATTCACTCATTAAATAAA  
TAGCTTATCTATGTATACAGTTCAACCTTACACAATTATACAAACTCTTTAGCTTAATTT  
TTTTATTATTAAGAAAAAAATAAAAAATAAAAAAGAGCGGTGACAGATGGATATAAAACA  
ACAACGACAACAACATCAACATAACATGTCACATTACTACATTACATTAACATTTATATC

>Glyma04g40100 | Gm04:46231756-46233255 FORWARD

AAAGTGGTCCCTTTGCAAAACAACCTCAAAACAACAAACAAGTCAAGATCATATGGAA  
AAAGCACAAAACCTAAATTCCTAACTAACAAAAAGCATTATTTCAAGGATTAACCAAATT  
AGGTAAAAACATATCTTACAAAAGCATAAGAGATATACAATAATTGCACCAAAAAATACT  
ACAGAATGCAAATATAGGTGACAATTATCTTTTATACCGTTATGGAGATTTTTTGGAAAGT  
CAAGTGACTAGCTGAGTGAAAGAAAGACATGATATCGCTTAACACCGGACGAAATTGTCT  
AAGAAAGAGAACAATATTTCAAATCATCTCCAACCTTGTTTAAATAAATGAGTTAC  
ATATGTTTTTTGATCCGTAAGTATCAAACCTTAAAGTATTAAGAAGTTTACATCAACTCATT  
CAATTGAGCTATTCCAAATATTAATGAGGTAAGGTTGCAAATAACTATTTAAGTCATTC  
TTATTTTTGTTAGTTTAAACCTTAGGGAGTTTTTGCCTGAAATATCTATTATATTGTTGTA  
AGATATTGGGATTAGATAAATATCGACGGGTTTAGATGATTTATACAAATTATAGATTTA  
AACTTTATCGTTTCTATTTTATAAAAATAAAAAAACTGGTCATTTACATACTATTGT  
GAAAAGGGTAAAAGATAACTAACTAAAAATATTCTCCACTCCATGAATGGAAACAACAA  
AAATAGATAATTTTTTTATAAAAAATAAAAAATGAGAAAAAAGTAAGATTTGAAAGGAAC  
CTAAGAACAACGAATATAATGTGTATAATATAATTGATAAATAATTTTATTTCTTAAATA  
TATAATCAAGATTTTCGATTCCCTAACCTATACGAATGAACAAACATTTGTGAAAAGATAT  
CAAATATTTAAATAAATTTTGATATTTTAAAATTTAATCCTTCATTTTTGACTAAGTAT  
TATCCTCGTTTTAAAAAACTAAGAGACTAGGAAAATCACTAAAAGGAGGTAATTAATTA  
ATATAGCCATGAGGGTGGGTAGTATTTAGATTTTGCCTTAAAGAATACTACTACTATC  
TTATAGGAGAGGAGACAGACGGTGTGAGCATCTCACAAACGTGCATGAATGCTGAGATCA  
GAGTGCAGACAGTGATGCTGAAATCTCGTCATGAGAGACAAAAATTAAGACAGAACTA  
TAAATGAAATGAGAGAGATGAATTGATGATGGATGAGATGAGAGTGTAGGCTTTGTTTTG  
AATACGCGAGCTAGGTGGGGACTGAATCAAATCCTAGATACCCCAAAGGATCACGATAT  
ATCTGTGACTAGATTTTTATCTCTCAGATATAAAGTCTGATTCTCTCTCTCTCTCTCT  
CTCTCTGGTTTTTCTAAAATTCTTCGCCACCAATCACCTTCGAATTCATATCCATTTAC  
TCTCTCTCTGTGTAAGTGTACATATATAGGATATCGGTTACGTTACATACAACCTCT

>Glyma03g32720 | Gm03:40508962-40510461 FORWARD

TTTCACCTTAAAGCAAAAATTATAGGGATTTAATTTAGTTTACTGAACAACAAAATCGT  
TCTATCGATTAATGCGCGAACCTATTTGAAAATAACTTAAATATAATGTCGACTTAAACC  
TACGCTATGTGAAAGTTATAGCTAGTTTAAAAGGTCAAATTACCTGATCGCATTATGAA  
TGTTAGGTTGCTTCGGCTTGGTTGACACTAATTTAGATTTGGTTTTGACAGACACTAAAT  
TATTTGTTTCAAATATGCTTGCCTCAAATATTAGTGTGGTGTGAGGCCAACACTATA  
ATTTGGACGCTATTTTTTTTGTACAGTAAAAGATTATTGATTGTTTCAGGGTTCCAATA  
TCTTTCCCAAACAAGTAAGTTTTAGTGATAATTTCAACTTTAGTTTTTTTATCCTGTCGT  
TATAATTATCAAGTATATTATTAATATGAACGAATGTTCAAACCTTTGTTGTGTTAATGTG  
TATATTTCACTTATTTGTTTTCTTTTGGATTTTATTGTTATTATTTTTCTTTTGGATTC  
GGTTTCCTTATCCGTTTTTATATTAACATGTATATATGAATTGATTAACGACTATTCAT  
CAATATATTTTCTAAAAACTTGTATTCTATTGAACAATCGATACACACATTGTTAATC  
AATAATTGACTCATAATCCTTAACTAGAATATGGGAGGTATAACATTTCAAGGTGAAAAA  
ATAACAACAACGGAAAAAAATAAAAATATGGAACAACCTAATTTTGAAGAGATATATACT  
ACGTACAGAACATGAATTGAGAATCTAATTCTATTTATAAGCAGGACAACTATGTAGTA



GCATTCTGTGATTCTAATAGCAGTGTTGTAGACACCACGTAATGTGTTATTCTCGTCCTT  
GTAACAAAAAGTTGTGTGGACATACGTGCTTACTTCTGTTTTATATTCTTTTCCTTGCA  
TTGTAAGGTATACATATATACATGTACGTAGTCGCGCAATGGCTCAATTAGAAGGAAGTT  
ATAACTTATGAGTTTGGCATACTTGCTCGTTTTTCATGCCAAGAAACGAAAGGCAAATAA  
CGAAAGGACCCCAAAAATATACTTCAAATTTGATTGTCTTCTTGTCTAGTTTAAAATAG  
AAAAAGGTAGCCTACGAATTTATTCAAGATAGGAATCATCCCCATTTTTGGAAAAATAT  
CACTCTCCCTCAGATTTTTAGATTGTGAACGAAATCCAGAGACACTTCCCACAAATTCAA  
TGTTGATGCTAACTCACATCCAATTTGGTACTTCTTTTTCTTTTCTTTTTTTTTTTGAAC  
AGCTCAAATTTGGTACTTTGATAATTCTTTTCGATCCATTAATTTCTTTCAATCTTATA  
TCACACCTTACTGAATTATCCACATCACATGGGAAGGATATATACGTATCATTCAATAT  
TTTTATTTATTTATTTATCTATATATATAGCACCCCAACTAGCTAGCTATACATCATCCA

>Glyma04g40640 | Gm04:46635232-46636731 REVERSE

AGCTAGCATTAAATTTTATGAATCATTTCATTTTTGCTCTAGAAAAGAAAATATCTTCT  
GTCCTCCAGTATTCGTTATGCAACAAGTGGCCATTAATGTACATAGATATTTTATAGA  
TACAGAAGCACGAACAGTTTCTCCATCGAATAAAATTTAAGCCAATCGCAATTGGTTAG  
TGATAAAACTGTACATAATTTATACGAGAGTGGTTGTGAATTTAAACATTCGTGTTACTA  
ACAAAGTGACACTCACATAGATGAAATAGCCAAATACACATGACTTTGTTCTCTAGCATA  
GTAAGATTTCTAATTTGAGTTATTTAGGCTTTCAAGCTCCATGTATGCAAAATCAACACT  
AACTAATAACAAGCACTCACTAATCAATTCAGCCCATGTTTGCCACCAAAAAAGGCAGTT  
CCTAATCAATACTAAATAAATATTGCTCACGTGTTTAAATACTTATCTCGATGATATATA  
AAAAATTAACACAGATAAATTAGTTTTAGAAAGGTAAAGTAGCATTTCAGGAAAACA  
AAATTTACTACAAAATGAAAGAAGGCTTATCATTTAGAACTTATTAGGAAAGGAATAAT  
ATACTACTGGGGAAAAGAATAAATAAAAAGAAATGGAAATATTTCTTGTTTAAACTACT  
AAGTTTAGTCCATATAAATATGGATGAATTTAGGAGTGTATAAATACACAAAAGAATCCT  
AGTGGAGCAAGAGATAATGATGATAGTAGGCTTCTAGAGTTGGGAATATAGAATAGGAGT  
AATTAAGTAGTTAATGATTGGATAAGAAGAAGGCGCTGTATTGTAAGGAAAAAAGTGT  
CCCTGGGTTGATTTGAAGGTGATCCCACCCAGCGCTGAAACAAAGTCAAACAGCGTGGG  
CGCGTTTGACAACCTCAAAGCCACAAAACCAGACTCTCCCTTGGGACAGAGCCACGTGAT  
ACATGGGCAACCTCAAAAATATCTATGGGAGTGGCTTTAAACCTTAATATCTTTCTGCCG  
GCGGGGCCACACCCTCCACATGAAATTGGGATATTTATTAGATTTTGGATTTGGATG  
GGAAGCCAACTAATACGAACCAAGAAAAAATATATAAAAGTGGGTGAAAAAATATCCA  
CCACCAGAACCAATGGCTTTTTGGCTTTGGATCTTTGGTCGAAAATCAGATCTGATTGCT  
GACGTGGATCATGTGCGCCAGCATGTCCTAGTGTCTAGATATTTTCTGAAACCAGGATAT  
TTTCGGTAGCCGTTGGATCCGAGGGCTTTTAAACGTTGGTGTCTCATCCCACGCCGTTTCA  
TCAGTCCGATGTTAACTTAACGGTGTCTCTGTCCACCCTTGCTTCCATATATCGCCT  
TTTTCTTTCTTGCTTTTTTATTTTTTACCCTCAAACCTTCGATGCGAGATATTGTGTGCT  
TGCTTAGAGAGGTTTTGGTCCGCAGAAGATTCTGAATTCTGATGCTCTAGTGCGATTCC

>Glyma06g06730 | Gm06:4812256-4813755 REVERSE

CCAATGTCCATTGAATGAGAAATATTCTGATAGGATTCGTTTTTTTTTTTTGAGCGCGTG  
ATGACAACGCGCATGTTTTCTCACAAATCTTGAGATTTGGCTTCACTATAAGATTTTGA  
TTAAGACTAGTGCTATAAATATATTTGGGGAAAAATGGCACTGACCTTCTCTTAGTTATT  
TTAAATGGCACTTTTATTTCTTCTGATTTTTTAAAAATGCTCACGTGCTTTGAGATGGT  
ATTGAATTTTTTTTAAATTATGCTTGATAAAATTCATTGAAAGTTAAAAAATTAGTTAAT  
GAGTCATAAGCGTTTGATAAAATTTGGTCAAAGTAGTTAAAAAATATAAAATTACAT  
AAAAGATAAAAAAATAAAAAGTTTACCTTAAATAGAAAATTTAATAAATGTTCAACAACA  
AAAAAGAATAACTATAAAAAGTTAAAAGTTAAAACTAAAAATTAATTTTTAAAAATCA  
CTACTTCAAATAACATATAAAAAACATTAAAAATTAATAAAAAATTTATCAAGCGA  
TTAAACATATTTTTCACTAATAAAAATAAATTAATAATCTTATCAAATATCATGTTATT  
AAAATTAAGGTCTATTGGTGAGGGATAAATATTAGGATCCTCTTAATGATTGAGAAATTGT  
GTAACCTGTACAAAAGTTTTACTTTTGTATTGTAGAGAAAAAATCTTCAAATTTTC  
GACATTTCTTTAACATTATACATGATTCAAGTATTAATTAAGAAGTAAAAATATACA  
ACATACAAATATTACAATTTTTTACATAAATTACAGGGTAAAATTAAGGGAGTCAATTCT  
GTAATGATTGTAATCTTTAAATATTATTTTTTTGACAACACTACACATAAAAAAGTTGT  
AGGATAAATGGTTATGAAACAAATTTTACAGGTGCCATATGTTATTTTATATAAGATATA

TGAGCATTACTTAATTAATAAATAAAGGGAAATGAATATTTAATAAAAAATAACATTTTA  
AATTTAAGCATTTTTTATATTTAGTCTTAATTTATTTGAAAACTAAATTGTTGTGTTT  
AATCTAAATATTGTGGGTTTTCGATAAAAATTAGATATAGAATAATCTTAAAAATTAGAAA  
CAAAAAATTAGTAAAAATTAGCCAAAAAATTACAAGACACGACACTAAGATTTGAAGGCA  
AAAACTTTGAGAATTTTGTAGTTTGAATAAACTTTGATGTTTTGGTAAATGAGTTTGGAG  
TAAAAGACAATTTAATTAATTCAATTTGCATGAACACACCCACTTCACTTCCCACCGCAC  
CCCACCATAATGGATTAGGAACAGGAACCCACAATAATAGCTCTCTCAGTCCATATACAG  
TCACAGATTCCATCACTTTTCGCTTCTATTGTTGCACGCTGACACACACATAAGCACAAA  
AAGACACCAACTTTTTTCGCTCCTTCCTTGCAATTTATTCATTACATTCTCCTCAAACTT

>Glyma17g10170 | Gm17:7594912-7596411 FORWARD

AAAAAGTATTATTTAACTAATACTAAAGAAACCTAAAATTCATTTTCATATCGGAAATTC  
AACATTTCAACCGGTTTGTCAAGAGTAAGACACGCGTGATTTCGATTTATAAAATGCTTTA  
ATTTAATTATTTTTTCTCCTTTCTCATCTCTTTTCTAAAGACAGACTCCATGTACGAA  
AAGGAAAAAGGAAAAAAGACGAAAAATCTAGCGTTAACATGCATTGACTAAGCAAAAT  
CACAAAATATCCCGCGTCTTTCATTTATCCATTTCTTCCAGTTTCCACCTTAATTCC  
AATCCTAACAGTGCAATTAAGCCCCACCCAAAATCAAACCAAGAATTGAAGATCGAAAAA  
GACCGTTCAACCTTTTTCTTATTTTTCTCCCCGTCTAGAGTTGCTGAACTTTCAAACA  
AGTGGCATCATTAGGTAAGTACTGATTATTATATCTATCAACTAATTCAATATTGTTATAATTT  
AAGCAGTAATTTTAAATTTTAAATAAAAATAAATTATGTTAAATATTGAGAAAAATAAT  
TTCTTTCTATAAATAATTTTTGTTTATAAAAGTCTATAATTGTATTTTTCAATCAAATGT  
TGATTATCCTCGTTACTTTAGGTCTTTTTATGTTTATGTACTCGAGACTAAGAAGTTGTG  
TATCTCGATCAATCTTATTACTTCAAGATTTTTCATGTTTGTGTATTTGAAACACATGAG  
TTATGTATCATTAGATTTTTATTGGGTCTTTAGAATGAATAATATGACAAGTTTAACTC  
AACCCCAAAGTTAATTTAAGGGGTGAGAATTATCTCTCACTTATATATTTTAAATGTGGG  
ATTACTTTTAGCCGATGTGAGATCGATTAACCTAGATGCCAAATAACCCGATCCAAATAT  
GGATTATTATATAATCCATATAATCATACTAGACTTAAAATTACACTTTTACATTTCAAT  
ATTTAAGAATTGGATTTTCTTCTTTAAGGTAGGACTTAAACAATAAGAACAATAATAAAA  
CTCTTTATTAATCAGCTCAAATAAGTGATGGAGTTTAACTTAATTGATTAACCAAATAGA  
TAAATTATTATAAATTTTTAATACCTGTCTTTAATTTGTATGGAAAAAATCAGCTTCAA  
TAAAATTCTCTTATAAAAAATATATTTAATTTGTAAAAAATAAATAAATAAAGTGGCATT  
GCCAAGTCAAACCGGCATTGCGAAGCCGCGGCAAGAACAGGGACACTGGCCCCAAGCG  
AGATACGTTTGGCCTCCTCTGACCGTGACCAACGTTACTATCTATTTAATTAATTTAATAA  
TGAAAACAAATACGTAATAATAAAAGTAAGGTTTTGATATTGACGTGAGAAGAGACAAGT  
GGAGGTGGCATAATCGCTTGTATGATTTGCAAAGATCTCTCAGATTTGGATCCTCCGA  
ATCTATCGCCTTTATTATTTTCTTTAACCCTTACTTTTTCATCTCACCATTTATTATTTA

>Glyma09g14650 | Gm09:16733939-16735438 FORWARD

ATAATACCAAGATTTCTGAGATTTTTATTTATCAAATTTCTTGACAGCGTAGTTTCCTAA  
GTTGACCACAAGTATACCTATTTTGGGTAATTAATCGCAAATTTAACTGCATTAACCT  
CAATAACCCCAAAAAGAAATTTCAATATTTATTTTTTTGAATAATAATAAATGATAAT  
AATAGGACACATTCATCGTAGGCGTGATTGGAATCATTGCGAAAATCATGTCGTTAGTT  
TTGGGTTGGATGGGGCATAAGGAGGGAGAGTTTGGGAGAAGCATTGTCATTGATCAGTTG  
GCCACACGAATAAGCATTACCGTATCAGTCCCAATAGGGTGTAACTGGGAACATGTCAC  
TCTGGCATTGGCGTGAAGGGAGAGAGAACTTGGAGAGAATGTGATCATGTATAAAAAAAA  
ATCATTTTTGTTCCAAAAGTGTCAATTATAATTCATTGATAAATATATTTCTAAAAGATA  
AAAATACAAAATTTAGTTTACGAAAATACCAATAAAAATGATCACTAACGTTTATAAAAC  
AGTCTACTTAAAGACAAATTTATCATTAAAATTTATTGTCAACGTGACCATACCGATTAGA  
TTGGACAAAATATTAGTAAGATATTATTTTTGAATGTAATGTCAGTAATTTTTTTTTTG  
AATAAAAATGTCAATATTTTTTTATTAGAAGAAAATATCAATTTTTTTTTTAACTAGATG  
TCAGTATGTTTTATTGGACAAAAAATATAATAAGTTATCATTATTGAAGAAAAATGCCA  
ATAATTTTTATTGGACTTAAATATCAGTATGTATCTATTGAACTAATTTGTTAGATAAA  
AAATTTTGTATTTAATTAAGATAAAAATAAATTTAAGATAAATTTTTGTCATTTTTTAT  
CATTACAAACATAACATTACAATAATCACTTAAAAATATATCGACAAACACAATTTAAAA  
CAAACATAATAAACGATAATATTGATTATCAACCATAATTTATTTATCACAATAGAAA  
TTATTTCAAATAAACATTATACCAGTTTACCAAAATAAAAACATTGTAATAGTGACAGAC



NNNNNNNNNNNNNNNNNNNNNNNNNNNNNNNNNNNNNNNNNNNNAAAAGCCAGAGAGGGGAAAAAATGAAGTGA  
GTCGAATTTGATTCTGAGGTTTTAGAATTTACTGCCTCCTACACACATGGTTACCATTGGT  
AATTATGTGTTACCATATGTCAGCATTAGTGTCAGTGAGAGGATAGTGAATTTGAGATTA  
GTTCTTATAAAATATATCAAGTAACTGAATTAATCTGAACAAACAAAACCTCTGTGTACACT  
TTTGTGGCGTTTTAGAA

>Glyma17g03380 | Gm17:2253781-2255280 FORWARD

GTCCTTCTGGTTTGTAGTTAAGGTTTTGTTTTAAGCTTCCGCATACTTGAAATTATTGA  
GTACATACAGCTACACAGCATTAAATTAATGATTTCTACAAGATAGAAGAACCGAAAAT  
ATGTTGCAATTATTATACGTTTCTCACTTTCTCTATGCCACCAAATAAATCAAAGCTTCA  
CATGGTGTCACTAGGAAAAAAATTATATATTAAATTTAAGGTTATATTCTTAAAAAT  
GCTTAATTATTTTTTTTTTTCATTTTAAAAATATTTCTTATGAATTTTTAAAATTGA  
ACTTTATTTTCTTCTAATTACCGTACTTATTTAATCAAATATAATTTTTTAGTTTCTT  
AATTATTTAATCAATACTTAAATTGCTTCATCTAACCTTAAATGTAATAATACGTTTCA  
AATTTTAATAAATTTTAAATCAAATAAACTAATTTTAAAAATTTTCAGAATTAATTT  
AAAAATTTTATAATTTAGTGTATATTTCAATTTTATTTTAAAAATTTTCAATTAAT  
AAACCAATTTTAAAAATTTTAAATAAATTTTAAATTTTAAAAATTTTATAATTTTATA  
TTTTATCACTAATGACATATTTTCTAATTTTGTATTTTTACTCATATAAAGCTTATAA  
AATAAAATGCATGGGATACTTTCAAATATATGGATTATTACTTATTTACTGTAATTTTAA  
AACTTTTTTTTTAATTTATTGTGCATTGTTATACAAATAAAATATCAATACATGTTTACC  
TGGTCAACATAAAAAAGAGAGAGAAAACCTTATTCAACTACTTTATGCATAAAAGCTTAA  
TGGATCAGAAGTTAATAAAAAATAGGTTTTTCTTATATTAACAATAAGTATTTTTGTTA  
AAAAAACAAGTATACATCAATGAGTTAAAAATATATTTTTTGGTTATAAAAGAAA  
AGCATTACATTAAAAACACTAAAATATTTATCATAGCTTAACTATGTACATGTTATCTA  
AAATAAAAAATATTAATAATTAATAATTAATAAAAGTGTACTTACTGTTTTAAAGGTAT  
TAACTAATGAACATTAAATATATTAATTTAAAATTAATAATAATAAATAACTACTTTATT  
TTAAAATTATGGGTAAACATAAACATAGGTACAGTAAAATCCAAAACCTAGTATCGGAAG  
TGTAAGAGTGTAGATTTAAGATGAGGGGTTAGTTCCTTCTATGAATGAGCTGGATCCACTC  
TTTCAGGAGCCACTGAGACCCAACCTTTGAATATCAATATGTAGTCACAAATAAAGCTTAA  
AATAAAAAACAATCTTCTTAATCCGACTGATTAGTAAAGCTTTTATCGCTTCTAATT  
AAAGAATAATTAATGCCGAGAAATTCAGCGTGTAAACAGCGACAAGGCGAGGACATAAG  
TTTGAGGCGCAGAACAATAGTTATTGTTTTATATAAAAAAAATTTCTGACCCAAAATTC

>Glyma15g24770 | Gm15:25945167-25946666 REVERSE

ATTCCTATTTTTCGTTCCTTTATTTAAAAATAGATATATTTTATTTTTATTTTATAAAAT  
TTTTAATTTTTTTCAATTCCTAATTTAAAAATAAATTCATAGATTTAGGAAATTATTTTT  
TTAAAAATTAATAAAATTTGTTTGGTTAATCATTCAAATATTTAGATAAATTTCTTAA  
AATTAATAAAAGTTATATGATGTTTTATCATTATTTTAAATTTATCACATTAATAAT  
TTAATAAAAGTAAAATATTTTTATTGTACTAAATGAAAAATTAAGTAAATTAAGTAAAT  
TTCCACCTATCTTATGGGAAAATTTTCAAAAAATTTGATTAATAAAATTTCTTAAAAAC  
ATTGTTTTTAGAAATGTTATTTTTTTTAAATAGATATAAACATATGAAATTAAGATTT  
TAAGATTCCTAAAAATCTAAAAGTATTTTTCTATCAAACGTTTCAACATGTAACAC  
AACTTTACATAATCATTTAATTATAAATTATTATTTAAATTTTAAATATTATTATTTT  
AAAAATCAATAAATTTACCATTAAGCTGTGATAGTACATAACTTTTTTCTCTCATATTTA  
AAATATGAAACCAAATTATATTAATTAATTAATAAATAAGAAAATTTATCAAAAAAAGGT  
GTCTAAAACACAGGATTAATAAATGATTTAAAAGGAAATTATTCTCCTACTAAATT  
TTTTTTATCATATTCCGTGTACAGAAAACCTAAAATGGAATATACATATAATAAAAAACA  
ATAATAGCACATTACCATAATACCAAGATTCTTCTTGAGATTTTATTTATCAAATTTCTG  
ACAGCGTAGTAGTTTCTTAGTTGACCATAAGTATACCTATTTTGGGTATTTAATCGTAA  
TTTTAACTGCATTAACCTCCATAACCCCAAAGAAGTTCCAACATTAATTTTTTGA  
GAATAATAGGACACATTATCGTAGGCATGATTGAAATCATTGTGAAAATCATGTCGTT  
AGTTTTTGGTTAGGTGGGGCATAGTGGGGGAGTTTGGGAGAGGCATTTGCATTGATCAGT  
TGGGCACATGAATGAGCATTACCATATCAGTCCCAAAGGGTGAATTTGGGAACATGTC  
ATCACTCTGGCATTGGCGTGAAGAGGAGAGAGAAATTTGGAGAGAATGTGATATATAAAA  
AGGATTTCTCCTAATCAGGAGAGTTCTTAACATAATAGTTAAAAATTAAGTAAAAAAT  
ATTTATTGTAATAATTAAGAGAATATGAAAAAATATCAACAACAATAATTTTTTTATA  
TTTAATAAAAAATTTATTTTTAATTTCTTAATTAACATCTTAATAACCTTGTTAGCATT  
ACTTATTAAAAAATAAAAACAGAGAGGGTGGTGGTAGCAAGATGCATTATTGTATTGTG

TTTTGCATCAGCGATTAACAAATAATTA AAAAAGTCAAAGGCTTTTTTCCCCTGTTTCTTT  
>Glyma19g31320 | Gm19:39086969-39088468 REVERSE  
ATACATATATCGCTTTTAGATTACAAAAGTTAACATGTTTACTGTTCTATTTATAATTTT  
GTATTTCCGAGTATATGCTTGTCTTTTTGTTAGAACAGTCTTAAAAAGTATGTTTCTTCA  
AGGATATTAAGAGACACATTTCTTTCTTCTTTCGTCCTGTTGAAACGCATGTAAAAGAA  
AAATTAATACTAAAATGTTCCGGCAAATTTATTTCTACTAAATTTAACCAATTTTTATGA  
AAATCCTTTTATTACCATTTTCTACTGATATTGAAAAGGATTTGAAATAAATGATAAATC  
GCATATAAAAAAATCTATAATCAAACCTTCTGATGAAGTTCTTTAAAAAACAAAAACACCA  
AATGTATAGTCTGAGCATGACCCAGCCCCATGAATTGAGTATTTATTTATTATTTATTA  
TTTATTAGAAGTTGATATGGTAAAAAGAATTTAGAGGTTTTGATATTGTTATGCTTTATG  
TTAATAGTTGAATGAGTTTGAACACATTA AAAAGAAAGAGAAAGAGAGAAAAAAAATA  
AAGAAAACAGAGATTTATTATATGAAAAGTTTCTTAATATAAGTGTGTGTTTGATTACGA  
TTATGTAATGCACGTATATTCTTTTTCTTCTTCTTCTTCTTCTTCTTCTTCTTCTTCTT  
CATATAATGAACTTATTTGACGTATTTTAGGAAGAGACGTATTAATAGATAGACAGAC  
TCTCAAATGCGTACTTTAACGTATGTTTAGATTGACATGTAGACAATTTCAACCTTTGTT  
TTCAAAGCATTCTTCTTCTTCTTCTTCTTCTTCTTCTTCTTCTTCTTCTTCTTCTTCTT  
ATTTCAATAACAATACAAACATGTGCCAAATTAATTTGAGTAAACTAAGTTTTTATCTT  
TTAAATAAGTTGAGTGAAACTAAATATTTATCTTTTACCAAGATATTGAATAATCATCAA  
CGTAGTCAATAAAGTACCAAAAATAAATTATGTGAAAACTCATTCAAGTATTAATAAAA  
AAAAACAATGATACAAAAAAATCTTAAATTTATGTGATTACCTTATTTATTTATTTT  
TGCATTGAATAAAACAAAATTAGTTGGGTAAAGTGGCTGAAATAGAAAAAGTGGTGGATG  
GATGTGCATGACATGAAAGATGGTTAGGATGCATGAATTAGATGGATGGGCATGGGAAGC  
AAATCTTAAAAGGGAATCAAAGAAATTGGCCTCTCTTTGCCACCACTCTCCCCACCTG  
CCCAAGATATGGTAAGCGCCACATGATTTACACCCAGGGGAAAATAAAAGGCACCATTG  
CTGACCTCACCTGTATCTCTTGAAGGGATTTTTATGGGCCCACTCTCACTCTCTCTCTC  
TCTCTCTCTTCTCTTCTTCTTCTTCTTCTTCTTCTTCTTCTTCTTCTTCTTCTTCTC  
TCACTTATGTTATATAGATATATAAATAAAGGGTACCTCCCCTCTCTCTACCCTCAAC  
>Glyma11g04440 | Gm11:3006659-3008158 FORWARD

AAATTA AAAATAATTTTTCTTCTCTCTCCTCTCCAGTTCCACCTCTCTTCTTCTCCTCT  
TTCACCTGGTTGTCTACTCTTTCTTCTTCTTCTTCTTCTTCTTCTTCTTCTTCTTCTTCT  
AAAAC TACAACGATCTGTGAGGCTGTTGATCTCGATCTGCGAAATTTGCTCCAACAACCG  
GTGGAATCCCGAGTTGTAGGTTTCGCGACTCTTCCCTGTCCTCTGCCATTGCGTCTCCG  
ACCCCTACACCTCTTCGGCGCCGACACCGGAGCCGGAGCAATCCCTGCCGGCAGAGAGA  
GGCTTTTGTGCTCGCCTTCTTCTTCTTCTTCTTCTTCTTCTTCTTCTTCTTCTTCTTCT  
CCAGACGACGACGCAGTATGTGAAGATGGAGGAGCATAATTTTCTTAGAGCCGAGGAGG  
CCTGTAATTTCTTCTCAGACGAACAAGCACAACCTTTGCAGTGGTACTATTCAGAGGAATG  
GAGTTAAGAGGAATAAGCTTAATGATGTTTAATTAATTGAGAGCGAGCGAGGGAGGGAAT  
AGAAAGAATAAGGCATTTTTGGAGGGTGTATAGTAATGGGATTGAGAGAGAACTTTGTA  
AAAATGAAATGGTGAAGATTTGAAGAAGAGAGGGAATGAATTGAAGAGCTTAGGGGGG  
TTGAAGCATGCTGAGCTTAGGGTAAGAGATGAGAGGTTGATGACGATAAAAGGGCTCGG  
AGAAGAAGAGTGTGCAGTTGTTGCGGCTGAAGATGACAAGGTGTTGGATTAGGAAGAGA  
TTTGAGACAGAGAAGAAAGGGAGGAGGGGACGGAGAATTGCTCATAGAGGGACAAAGG  
GTTTTTTTACTTTAATTGATTTTTCGGATTA AAAATCGTCAAGAAAATTTAAATTTAATTTGAT  
TTTAAAATAAATAATTAATGATTTTTGAATAATCATGAATCATGTGATCAAGTATTTAAG  
GATATCTCATTACGATACAGATTTAAAATAAATAATTTCAAATATTAATGCAATACGAA  
ATTTTTTTATAAAAAATTAACACAAAAATTAATATATATTAGAAAACAAAAATATATTT  
AAATCATGTTTTTTAATCACTTTTAAACATACATCTTTTATTAGAAAATGAAAGGAAATT  
ATATATAAATAATGAATATGTCGTAATGATGCAAGACAGAATGAGGTAATAGACAAAATT  
CATTGTACAGGAACAAACTATTCTGGCGTAAGAAATTCAGAATAAAGTATTAATTTCA  
TTACAAAGAAGAAGACTCAAATCTTATATAGTAGAAGACAATGCATTTATTTTCAACTCA  
AACTATAGGAACATACCCAAAAAAAATAAATAAATAAATAAATAAATAAATAAATAAATA  
TTTTTTTTTTTTTATTATTTTACAGAAAAAAAATGGTAAGAAATGAGGGTAGATTTGGA  
AATGAGCCTTGAAGACTTTTTTTCTGCATATTATTACGTGGTTCTTATTAAGGAGCGAT  
>Glyma04g29250 | Gm04:33371184-33372683 REVERSE

TTAGCCTTAATTGTCAAATTAATTATGCAGTTTTATCATTGGGCCTACTGGATTAATTT  
TGTGTTTTTAATTTAATTTTCAAGGAGAAATTAACAATTGGGCTTGAATCTAGAATTGGG

CTTGGACTTGAAGAAAACAGACTATTTTATTCTACCCAATCTTATCTTATCTAGATTTTA  
TTTCATTTAGATCTTATCTTATCTTATCTAGATTTTATTTTCATCTAGATTTTGTCTTATC  
TTATCTAAATTTTATTTTATTTATGAGCTTGGACTTAAAACAGATTTGTAAGCTTTGGGG  
CTGAGAAATATATAACAGCATCAAGGAGAAATAACGTTAATTTTGATATTTTCTAATTA  
AATTTGCTCGCTGTTTAAATTACAAAACAAACAACCCCAATTCGTTATGAACATTTGG  
CTAACCATGATCGTTGGGAGACGACCTAGGATCATTAAATGTTTATTTGATTCGGGCTA  
ATTTGAAAGGATAAATTTGAAATATCGTAGACTTGTAACTACCATTTTTTTTCTAAATTA  
TTTCTCTAATTTTAAATTAACCTCAGGCTACTATTAATAAAATTAATAATTCGGAAACG  
AGAAACAAATCAAACAGGGTCTCTGAGTAAATAATTAATAAGAAAAAACTAAAATAG  
TGAATGGTCTAAGAAATAGCAACAGAATCGTTAGGAACCTTTGAAGTTTGAAAATTCT  
ACTATATGGTTTATGCGGTCAATATTGGCTCTCAAAGAACGACTAAAGACAAACAAACAT  
TTCATAATAGTAATCAAAGCAAGAAAATTACGTTTTGTATTGGCTTGTATAGTTGTA  
GTACGAGGGTCACTACTTAGTGCTATGCAGGTCATGCACGTGCATGGAATAGAATAGA  
CCACACGACTCTGAACACTGAACAATGATGTTTGGTCTCGTGAAAGGGCAATAGTAGG  
TTAAGCTTAAGAGAACAGTGTAGCACACCCCAATAGTTGTCTTTTTTTTTTTTATCCA  
CAGTGATTAGGGCATTGAGTTCTGGTGGGACCTGAGATACCCGACAAGCTTCAACTTAA  
CCTTTTGAGTTGATTATGTCACACTTAAAAATTCATTGTCTTTCCTCCAGATTATGTCTT  
TCCTCCAGATTATATGTCATCCCCACGAATTCAGAGTGTGTTCTCAAGTGAGTTATAAT  
TATTGAATTCATAATTTTGTCTTTAACCATAAAAAAAGGGTCAAATAGAATAATAATA  
ATAATAATAATAAATAGTAATGAACAAGTCAGATTTTGAAGTTTGGTACAATAAGAGCA  
CCTTTCTTTGCTTGTTTTTCAATTCAAAATCAACCCAGAAAGATCCGCCAGATTCTTGA  
TGAAATCTGTCGGATCTTGCTTTCAAACCTGTCAGATTTCTTGGTGGCATTGTATCC  
TTCTCGACTATGATGTGTGCTCCCCTTTTAAATGTGCATGCCACCCTCCTTCATCTC  
>Glyma04g34820 | Gm04:41064879-41066378 REVERSE

CTCCCGCATATAGGGTTAGTTCCTATCTCCTTCCACAATACACAAACTAACTCTGCAT  
AATATGGAATCATCTATTAGCCTAAGTCGAGTATTTATATTCCTTTAAGAACCCTAGAAC  
GGGGTACACACTTGAATGCTTGGACATGTCGTCTATATCGAAACAAACACAATCATGT  
TTTTGATTTTGAATACAATTTTAAATTCCTTTTTGACTAATTCATAAAAATTTGT  
TCAATTAGTGTCTTACCAAATTTGAACTTGGATACGTTAGGGCTAACGCGGTTAATG  
TGGGGTCCCAGACCTTACACATCGACTTGGAGAGATGCCTTTGTCAAGAGGATATGAGTG  
GAGACCTACAAAACAAAAGACTTTACTACTCAAATAAGAATATGGGAATAGGTGCAAGTA  
TGCTTAAGCTCGAGGGATGAGCAAATGTGTGTAGAGGATTAGGTGGAACCTTGTATTTATA  
ATAGTAGAGCATGACTGTCGGTCTTTGTTTGTAGGGACTGTTATAACCTTTGTAATAAT  
TCTTTGCTTGTAGATAATAGTCGAAACTTATAAATAATGTTAGAAATAAACATTTATTT  
ATAGATAAAAGGTAGAAAATAAATGTACATTGTAGATAAATTTAACCTTATAGATAATT  
AATTACCTGTCAATAGATAAGGTTAGTCAAACATATTTAATAATTAAGAAGTTAAAAATG  
ACTTGTGTTGGGAAGTCCAATTGAAGACTGACTATTTGTGGGTCTGAACAATATAAT  
TAGATTTACATATAAAACTATAAAATCTAACTTATGTTCAAATCAAATAGGACATAA  
ATACATAAAAAAAATCTTTTTCTTTCTGCTGCAATGTAATGCAAATTTACAACCTGC  
TGAGAAAGAGAAATTGCATGTGCTCAAAGGCAAAATAGTAAAAAGAGAAAAAAAAT  
CAAACGTGTTGTATTGTGTTGTTAAAGTCGTATGCTTGTTCAAAAGTTAGAAAAAGAAA  
AAGTATTGGATTGTTCTTAGTAGTTGGTTGGACTTCTCCTTAATCCAAAAAATAAGTA  
AGACAACCAAATCTCATTTTTTAAATAAAAGCATTCTCAAAAATATAATCTTAACCAACT  
AAAAATCTGTCTCAATCATATTTAATAAATTGAAAAAATTAATACGTCAACGTAAATTC  
CACGAAATTGTAATAATAACGTAGGAAGTAAAAAGGTGATGATCGATCTAGGATCTAG  
GTACGCGTAATAGATGGTTCAAATCTGAAGTCTGAACCGTGTGAAAGTCAAAGATGGCT  
CTCGGAAGGATGCAGAGAGAGCGAAGGTGGACCCAAAAAAGATACGTTTGGTCTTGTCTG  
ACCATCAATAACGTTACTGTTTGTAAATTTTTAATAATAAAATAAAAAAGAATGATTGT  
GACAGGAGAAGCGACAAGTGCAGGTGGGATAATCCTCTCTGCTTCATTTCCAAAAACAAC  
>Glyma13g19870 | Gm13:23357492-23358991 REVERSE

GGAGAGGGTTTTCCCCATTTATACACTATATTGGCACTATCTCTAGCCGATGTGAGACT  
TGAGTTTTTCCAATAGATATGAATTACCATACACCATTTGGTTGGATTCTAGCTCGATC  
TGCTATATATGTGTGTGTGTTAAGCATAAAAGAAGAATCAAACCTGAGAGAACCTTAGG  
CATGTTGCAACCTGCTCACTAGGCTGGACCACTGAATTAAGAAGATACTGTTATGAAAC  
CATCAAGAATGGACATTGACAAAATAAATATCTTTTTAATTTCCCTCCTACAATTTA  
GGAGACTCTCAGAAAAGTGTGTTTGTGAATCTACATGTTACACATAAACCACCTGGGGGT

AAAGGTTGTCCATATCATTTACCCATGAATGAAATTGTATATTTTGCCTGTCTGTGGTTT  
CTTCATTACTCATCAGTTCAAATTACCCACTTCTGTTTCTATCCCTGCTGTCCAACAGT  
TTTGGTGCTAAGTTTAAATGGATAGCCTTGAGCCTCATGTAGGTTTTCTGCAACTACCTGG  
GGGTAGGGGGGGCTCCTTTCAATTTGAGTATGTGTATAAGAGGAGAAATAATTACTGATCT  
GATGTACATGGCTGAGAAATTAATTATACTGATATTTTATTCTGCTTTGAAAACCTGGAA  
TTGATATTTTATTTTTTTTTGAAAACCTTGAATGATGTAACCTATCTGGGTTTATCTTTTG  
TAATTGTATATCATGTAATAATGGTTCACTTTGAACCTAACCTGTTAATGTGAAAGTTTT  
ATATTTTCAAATTACAATCTCTAAAAAATTTTGTGCGATTGAGTAGGTAGTGTGGCACA  
TTTTGTTTGTCTAATTTAATGCAGAAGGTTCAATAGTTGTTACTGTCTGATTATCTTAGA  
CCCCTGAATGAGAATGAGAATGAGGGGGAGGGATCAGCTGATGGTGTGTCTTTTCTAGGA  
GAAAGAATGCCAACTTGATAGGTGGTTTTGCCGGGATTGAGAATTCTGATATGGGATTG  
ATGAATATAGGGAAAGAGGTGTGAGTGGGAGAGAGGAGGCAGACATAACATGACTTGGG  
GAGAGGAGGGAAACCTCTGGTATAGGAGTTGTAACCTCTGGGGGAAGTGTCTCTTGTGG  
GTACAATTTCTGATAATTGAATGATACACCTCATTTTGCATTCATCTCTTACTGTTTCTGT  
GACTGTGTTGTGGTGTCTATCAGACTAGGATGGAATGCTGTTATCACTTGTACTTGTG  
TAGTTGCTAGTATATGAAAAAGTAAAGGGCTAGAAACCTCATAAECTTAGCATGTCATTCA  
TTAAGACACATCAGTTTCAAATGTTTTAGTAATGAGGTAACAGTTTAAACAGCAAACACC  
ACAAGTCATCAGCATACTGTTTTAGGACTAACTTGCCAGTATTGCCATATGGAGGTCATG  
TTCTAATTCTGGTAAACAAAAGCTACTTGACAAGTTCTTTGTTATCTCCTGTTGCAGAGC

>Glyma01g40900 | Gm01:52560382-52561881 REVERSE

TTCATCCCTATCAAATATACTTTATATAGAAAATCAAATTCATCTCACTCACAAAGCTA  
AATGTATATTAATAATTATACCAAATTCATTAATAACAAATATTAGTTTTTAAATAGAAA  
TTCATATATGGAATTTAGCATTTTATCCTATTGTCAATTTGGATAAAACAAGAAGTACTTA  
AAAATGTATTTGACACACATAATTTACATTTCACTTTTCAATCTTATGTTAAAAA  
AAAAACAAGAACACATGCACACACTCTCACATCTCTCTCTCATCAAATATTTTGTCTA  
TAATGCAAAAAATTTTATAATATGAATTTTTTATATTATCTCATTTGATTTAAATGATA  
AACTATTTGAAATAAATCAAATATAAAAAATTATTATTAAAAATATATAGTTTTTC  
AAGTGTAACCTATAACTATGTATAAATTATAACTATTTTTGTTAAACAATTTAATTTAA  
TTAATTAACATGCTAACTCTGAGCTTTATCTAGCTTTTAACTGTCAGTTAACCATGTGTT  
GATTTTGCCAAATACACCATTTCTCTCTGTTATAAAATTTGATCTGGTTTGATTTGAAA  
CTTTTTGTCTGTGCTATAAAATTAGCATTCTTATCTACCCGTGGTTTGCATTGTTGCCAC  
ATAGGCGCCCTATTTGGTGTATTTTTCTGCAATTTTCTAACACTAGGTACACATTAATAA  
CGACATATTGTGTTACATTTTAGTATTTACCCAATTGCACTGTATTTTGGAAAGTGCTTT  
ATTTCTTGAGTTATGAAATTATACAATTATCTGATTTTTTTCACTATTACCGTACTACCG  
TACACTTTGGATTACGTACGTAGGATAAATATTGTGCTGGATAATCTCAAATTTAGAAGG  
AAAAAAGCAAACAATTTAATCAATACTTTGGTATTAACAATTTATAACAATAAATAT  
AATAAATAAAGTTTAGTTTTCTAGGAAGAATAAATCACAAGAAAATACAAAATAA  
AATTGAAAAGCTTGACAAAATTGAAAAAACAATGTTGGTTTGTTCGTAACAAA  
GTGTATTTAAACAAATTGCAAAGAGTAAATGATGACTATGTCATAATGTAACATA  
TCTTTTATTAGAAATGAAGGGAAATTATATTGATGACTATGTCATAATGTAACATA  
AGAAAGAGGTAATAGAGCACAGGAACAACAACTAATTTTGGAGTAAAAAATCAAGAAATA  
AAGTACTATTAATTTTATTACAAGAAAAGAAGTTTCAAATTTTATATAGTAGAAGACA  
ATGTATTTATTTTCAACTCAAATTATACTGTAGGAACAACATGTAATTTTTTTTTATAG  
AAAAAATGGTAAGAAATGAGGGTAGATTTGGAAAATGAACCATGATTGACCATAGTGAG  
AGACTCTTTTCTGCATATTATGTGGTTCTTAAGGAGCGATGGCAACTGTTGAGTAGTCA

>Glyma09g04470 | Gm09:3298206-3299705 REVERSE

TCATACGAGAAAATTATGAACAATACAATTTTGTACATTTCAATAAAAAATTTTCTCCTT  
ATAATCTTTAACCAATATCACAATACATATGTTAACATTTTTCTTCAAATATTAATG  
ATTTACCTTCGAAACAAGGAAAAACATGGAAAAACAAGTTAAATATTAATTTTAC  
CTTCAGATCAGAGTAAACGTTTAGGAAAAAGAAAGTAAAGTGAATTAGAGTGATAACAG  
TGAAGATGTTTTGAGGGTTGCATTGTAGATTAGAGATTGCAATCAGTAATATTTATGGAT  
ACTCATAAAAAATTATTCCAGTAAATAAGCAAATTACTCGTTAATAATAGGTAATGATG  
CAAGTAATTATTCCAAAAAATGATGGGGGATAGGTTGTGTTATAAGTATCTTTGTA  
TAGTACACACCTGATCCCATATATACTAGATAAAATACTAGTTATATAAAAAATGAT  
TAAGCAATCTATATCAATTAACCTGACTATCTAAATTTTCAAATTTAACTTTCAA  
GATTTATACAGATTAGGAAAAAACGTCACAACAATAAAAAACATTATTAGGTCAAAT

AAAAAACACCATTTAAATCTTTACTCTTTAAATAATTAAAATATTCAATGAAACATATT  
CATTCTCTTTAGTTAATTCAATTGATACATTGATGAACAATATCTTTTTATTAATAATA  
GAATAATCATTTAAATAACACTTAATTTATACCTTTGATATCCAACCCATAATTAGGAG  
CATGTTTTGCTCCCGTTTTAAATATTAATTTACCATTATAACAGAAGAAAAACTT  
GGGAGAAAAAAGTGAGAACATTGAACATGTTCTTTGCTGAGTTTACTACTTTAG  
AAGTGTGTTGTGACCTTTGTGACAGCGTTGGAAGTGGTTTTGAGATCCGAGGTGGAGGG  
TTAGTTAATCCAATCCAACCAATGAGCTGGATCCACTATTTGAGGAGTGAACACCCCAAC  
CTTCAAATATAATATTAATAAATTGTCAAAAATAATTACACAACACTATCATTTTAAATAT  
TATTTTTTAGGGTCTAACTGATTGAATAAATTTGTCAATTTTTAATATTATTTTTAATT  
TTTATGGATAAAAAATATATTTTAGTAATAACATATTTTTTTTTGATATCTTAATTAAT  
AGTATCATTTTATGGAAGTAATAAAATATGCCAGAACTGAGCATGAGCTTCAAACGGA  
GGAGAAGGCTTTCAGAATCAGACCCACAATCATTTCCATTATTTATATGCTATATTATCT  
GCAGCCAAATATAAATTCCATTACCCTTTCTCAGTTTCTCCCTGAACTCCATAAATA  
ACTCACTTTGTATTATTTTTATGTTTTTCACTTCCATGATGCCAGTTTCAACCATGTGA  
AGTTGTGTGTGTGCTGTTGTTGTTGTTGTTGTTGTTGTTGTTGGATCTTCAGAACCAACC  
>Glyma19g35470 | Gm19:43058614-43060113 FORWARD

TTTTAACATTAGAGTTAGTTTTGACTGAGACTAATTTGTTAGCTTCAAATAATTTTACA  
AAAAATGCCTGCGTCAAATATTAGTGTGCGGTGTTGAGGGCAACACTATAATTTGACCG  
TATATTTTTGTGTTACAGTAAAAGATTATTGTTTGTTCAGGATTTCCAATTTTTTC  
CAAACAAGTTTTGCGTGACAATTTCACTTTTAGTTTTTGCACCTCGTTATAATTATCA  
ATTATATTAATAAGTTGATTTTATTTTTAATATGAACGAATGTTCAAACCTTTGTTGTG  
TCATGTGTATATTTCACTTATTTGTTTCTTATCCATTTAATATTAACATGTATATATG  
AATTGATTAACGGACTATTCATCCATATATTTTTCTAACACTTGTTAGTATTTGATCAA  
TCGATATACATTGTTAATCAATAATTGACTCATAATCGTTAACTAGAATATGGGAGGTAT  
AACATTTGAGCGTAAAAATAACATAACAATGGAAAAAATAAAATATGGAAACAACCTGA  
TTTTGAAGAGATATACTACGTGGAGAAGATGAAGAGAGAATCTAATTCTATTTATAAC  
CAGGACAACTAGGTAGTATAGCATTCTGTGATTCTAATAGCAGTGTGTAGACACCACG  
TAATATGTTATTCTCGTCTTGTAAACAAGTTGTGTGGACATACGTGCTTACTTCTGT  
TTTATTCTTCTTGCATTGTAAGGTATACATACAGAGTCACGCAATGGCTGAATTATA  
AGGAAGTTATAACTAATGAGTTTGGCATACTTGCTCGTTTTTCATGCCAAGAAACGAAAG  
GCAAATAACGAAAGGACCCCAAATATACTTCAAATTTGATTGTCTTCTTGTCTAGTT  
CAAATAGAAAAAGGTGGCTACGAATTTATTCAAGATAGGAATCATCCACATTTTTGG  
AAACTATCACTCTCCCTCAGATTTTTAGATTTTGAACGAAATCCAGAGACACTTCCACA  
AATCAATGTTGAAGCTAACTCACATCCAATTTGGTACTTTGATAATTCTTTTTCGCTCCA  
TTTCTTTCAATCTTATATCACGCCTTACTCGATCAATTATCCACATGGGAGGGATATAT  
ACGTGTCATTTCAATATTTTTATTTATCTATCTATATATGTATATAGCACCCCAA  
CTAGCTAGCTTTACATCATCCATTTTCACTTCCCTCCTACTCATAATAGTGAGTTTA  
CTCTCAGAAATTTGGAGAAAGAGTTCTCATTAGGTTAGTGATATTGCTACATTATCCTTA  
AATCTACACAAACATTTAGCAATTAATATATATATAATATCTTTGTTTAAACAATTA  
ACTCACTGTATTTTTCTTTCAAGTAGTGTGTGAGGAGACGTAAAAAGTTACGGAATCCC  
AAAACAAAACCGAATGGCACCTAAAACTTGGGCACCAAATTAACAGCACTTGTTGTAG  
>Glyma05g27670 | Gm05:33566853-33568352 FORWARD

TAAATATAACATACTATTTGAATTTCAATTTATCATAATTATGAATTATAATATCTTAAG  
AAAATATTAAGCCGTTTATTTATTTAAACATTACTTATCTTTTTATTTATGCTCAATCAC  
TTTCTTAATTATAATCTCATAGTATGTTTATAAGTTTTATTTCAATTGTAATTTATAAAA  
TTCTAAATACTTCTCTTTGTTTAAATTGGTTCTTACTCTACTCATATTTTTTAAAGACCT  
CAAATCCCATTAATATTCACCCAAACAATAAACACTTTGTTCTTTTACACCTTACGCT  
GTGAATTTTGAAGGACTGACCACAGTTAAAAGTAGATAAAAAAATTTAAACGCATAATTAC  
ATTATTATTATTTTTTTCAATGATGACTTATTTCACTCAACTTCAAATTTTAGTTTATGAG  
GGGGGAACCCATAAATAACTCCTACATATTTTAAAATTTATTCTGATAACCATTCCTAAA  
TTATAAATTACTTTGCAAGTGTTCATAAAAATAAATTAATTAAGAAACATAAATATA  
AACTGATCATGTTAACTTGGGTTCCAATTAATGTCTTGGCTTGTCTAACCATATTCTCTT  
GTCTCTAGAATGCATTCCACGTGCCCTTTCCACAACGGTTTATCTTCTTATTTTTCTTTT  
CACAAAGATACTACTAACAGACAACATAGAGGTGATTTTTCTTTATGTATATATCTTGT  
CCCCTTTTCTGATAAATTCCTATCTCCAAACATTTTTTTCATAAAGAATACGGCTTGAT  
ACTTGTGTTTGTCTTGTCTTGAATTTAAACCGTATATCACCCACTTCAACCTCATTA



CAAATATGTAAAGAAACAGAAACCAACCCGTTAGCTATTATAAATATTATAAACTTACCT  
CTTGAAAATTAGAATAGACCTTATTATAGATACAGTTTGCAGAAAAACCATAACCGCTAA  
TAAAAACACACTCTATTTTACACCATTTTCGCAAAAATGAGCCTTTTTTTATTGCATTT  
TAAAAAGCATGACTCTGTCTTTTTTCTCCTGAGATAACTTTTTCAATTGAACAATCTTGT  
CATCTAACTTTTTTGTATTTTTAATATTAGTATCGCAAAGCAAAAACCAACCCAATAT  
TTTCTTCTAATTCTCATCATCTTTGTACATTGAATTTGCCATCTTTTCATAAAAATTTAAT  
CTCATCCTCACCATGCTTTTTTCTTTTTATGTCTTTACTCCTTGTTACTCAAACAACCT  
TCCTTGTTCTAGTACAGTACTATTCTTTTCAGCACAAAGATTGGAAGACCATAACGTGC  
GCCACTGGGACCGTTAATATTCGTTAGTGCTTTTTGTGAGTGCATGAAAATATATACATA  
TATAAATATACATATATTCCCTTACCTTAAATTTAATTTAAAACCAATCAAGCCAACC  
CCATTTTTCTCTTGAACCTACAAGCAGTGATCCACAGGACTCGTCTCTCTAACTAACAAC  
>Glyma04g42680 | Gm04:48368298-48369797 FORWARD  
GTGATGTGACTTGTGTTTACCCAAAGTTAATAATTAAAGCAGATGAAAGGTTTATTTCC  
ATGTTTTACTCTTCCCAATTCGAATTGGAGATTGACTACAACAATGTTTGAATTCAG  
GTCTCTGAGCGATGTCGACATTGCGTCCAATTTGAGTAAGCTCACATCTATTTTGTGA  
TATTCGGTGGGATTTTCATGAAGATCTTGTATTGTTGTTTGTGTAATTTGGGTGCAAAG  
TAGCTAACCAACATTAATTAGATTAGGCTATCATACTAGTAAGCAAAAATCACACATAAA  
AAAGATGAAATATCGCAATAATCACCTAGATTTGAAGCAATGAAGCTATTAAGAATAGGA  
TTACATAGAATCTTAATTGACCTGAAAATTGCTTGTTTATTCAAGTTGATTTCAAACATA  
TCTTATTTCTTATAGTTTATTCGATATTTTCGTGCCCGACAGAATGAGTTTGTGATGTAT  
AACGAGTTGATGGGCTTGAGCATGTGAATATATTTAACACCAAAAATGCAATTTGTCAC  
TTTTTTTTATATAAGAAACAGATATAGAGACACAAAATTATCAGTGCCAAACGTCACA  
ATATAAAAAGAGATCAGTGGCCCAAATCATTAGGTTACATGAAATGATAGTGAATAT  
TTTCATTAATTAAGTGAATTTCCACAACTTTTTGAAAAAAAAAACTGCAACAAATGGT  
CTTTTTCTTTTTGTAACAAATGATGATAATAAAATGGTTCTATTAATTAGGGGTCAC  
ATCCTACATTCCCAGCGAAATGTTAGGCTAAAGTAAAGTAGGCTGAGGTAAGATTATCC  
GTTAGTTGGAGGAAAGTCTCCAAATGATCTTACCCAATGCATGCACTTTAGATTTTACA  
CACAGCACTGTGTATTTTACAATGGCAAGAATATTAATAAAGGCAAAAGCGAACAACAAA  
TAAAACCCACTCATTGCCCCAGGAAAATTAATATATGTAGTTGAGAAAATTAAGAGGAA  
AGTAATGGCGGTTAATTAGTTAGGAAAGAAGGGTTGTTGCTTTAATTTCAAAGTGATG  
CTCATATAATTAGAATAGGGTCTGCTAACCATTAATTAAGAAAAAAATATTTATTATA  
AAAATTAGAGAAAAAAATTAATAAATTGTATTATAATTTTATGTATTTCAATAAAAATA  
TTTTTTCAATTCCTTAATCAATATTTTCATAACACTAATTATTGAAATAAAGGCAACT  
ATCCGCACCCCAAATTCACCTTCTTTCCATCATCATGATGACCGAATGGAACAAAGATC  
TTGTGGTTTTTCTTAGCAATCAATAAAATCCAATTGAAAGGGGAAAGAGAGAGAAAGT  
TTATGTGTGTGGTGGTGTACCAACGCGGTAGAGAGAATCTAGGGAGAAGATCTCAGCAT  
GAAGGCACACACATAAATAACACTACATCCATGCCACTGTGCCACCACAGTTTTTTCTCT  
>Glyma07g26890 | Gm07:29690032-29691531 FORWARD  
AGAGACGAAAAATAAAAATAAGTATATGTATGAGACTATAGAGGAAAGTAAACCCAATAAA  
TTAATCAAAGGAGGACTTTTCTTTTTATCTATAATCAAGGAAGACCTTAAATGAAAGAGT  
AACTGAGTTTAATAAAAAATTTTCTAAAAGAACTACATATAAAGGTTAACTCTTATC  
TCAACTTTAACTTTGGCCCTCGAATTAATCATTTTTAGACATGTACGTAGTATTCTCAA  
CCTAACACTCTTTCTTTCTTAATTCTAATTCTAACATTACCAAATTTAAAGTATAAAAA  
CGTATACAGTAAAAAATGATAGCGTTTGACAATAAATTCAAATTCTAAAAGTATACCAA  
AACATCAATAATATAAAAATATAAAAAAGCTAAAATTATTTTTTCTCATTTAATTTT  
TTTGTTCAGTTTAGTATTTAAGTTTAAATTTGTTTACTTTGGTGAATTAAGTGTCTCT  
CTGTTAGATTAATTTGGTTTTTCCATAAATTTATCAAATTAATTTTGCTACTTAATAGTT  
AATGGCACGTGACAAATTGTGGAAAATATCGTATAGGAAAAATTAATATCATCAGTACAG  
AATCCTAACAAACCAATTAATTTGGTTCGAATTGAAATTTTAAATGCTTTGTTTGGTTTA  
TGAATGAAAGGTACAAGTAAGAAGGTGAAAGGAAATAAAGAAAAAGAACAGAAATTAGA  
AAATGAAATAATTTTTTAGGTTATTTGTTGTATATAAAGTGAGAGAAAAAAATTTGG  
CTCTCGTGTAAACAATTTGTTAACCTATATACATCATGAGACAAGACACTTATCGAGAGAG  
ACCTAACTGCCTTGAAATTTGTTGTGTAATAAACTACTAGTACGATATAAATAAA  
GTGACGTCGGTAAGTGTCTCAAGGTTAATTTAATTATATAAAAGTAAATGCTAACTAAT  
GTATTTGGGATATTTAAGAATTAATAAGTAAATATTTTCAATTAAGGTTGTAATAA  
TGTTGTTGTGACTTTTTTTACATTTTTATATAATTTTCATAATAGATATTTTATTTAA

TTTTTAATTAATGTTTTAAAGACATAGGTTACCAAATTTTTAAAGACAATAATATTTT  
TTTTATAATCAAGAGATATTTTTGACTTTTTATTTAACATTCAATTAATTTCTTTCTAT  
CAGATTCATTTATTTTAGGATAAAAAATATATCTTTAATTGTAATTTTATGTTAAAGTTAA  
TTATCAAACCTAAAACCTCAATTTAAAGAATAAAGCATCAAACCATTGATAATAATTA  
AGAAAAAGAAGAAATATAGTATTTAATATTAATAATATATTTTTCTCAAAAATAATTAAT  
AATGTATTTAATCATTTAATTTGGCGTGATCTATTTATTAATATCTTTCCAACCATTAT  
CATTTTTCGTCCCCTGAAATTTCCCATTCGCACCTTTCCATTTTTCTTCAGTCCCCTC

>Glyma05g00880 | Gm05:506430-507929 REVERSE

ATGAAGGATATGTAATTCCTGTTGGCTGTTGATGTGGATGTCATTCCTTCCTTCAGATAA  
CTTAAAAAGTTTTCACTAAAAAAAAGACAATAATTACATCAATTGGCATTGGATTTTG  
GTGCGACTGAACAGGTACCGTACCCGTTCTGACATATAATTTAAAGAGTACTATTTTGT  
TTACAGAGAAACAAAAATTATTAATTAACAAGATTTGACATTTAAAATGCAGGTTTA  
ATTAAGTTTCTAGTATTTTAAAAGTTTTTTTTGATAATTTTATAGTCATTTGTTAATTTT  
CATTAGTGTTTAAATCTTTAAATCTTTTTACCTATTGTTGGTCTCTTATTTATTTTTAT  
TGTTCAAGATTATTTGTTGTTTTATTCATTTTTAGTTTCTCATTTTTATATTTTTGAAT  
TAATTTTAAACAATAAAAAATAAATAAAAAACTAAAAATACTGAAAAAATAGTATAGACT  
AAAAATTGATAATGACTAAAAATTAATTTTAAAAAATTGAGTGACTAAAAGTTTAATT  
AATCCTAAAACATATTTTCGTTTGTTCCTGCGACAAATAATGTTAAAAAATCAAGTA  
AATTTTACTTATATAGAATAGATAAGGTTCTGCAAGTGGCATTTCGTACATTACTTATCAA  
GTAAATTTACTTATATAGGATTTTTGTTCTTTTTCTTCTGCAAGTGGCATTTCGTAAATT  
TATATTCCTTTTAGTTACTATAGTGAATTTTTTAATCCTAAAAAATAAATATAAAGTTT  
AATCCTAAAAAATCCACTTAAAGAAATAAGTTTGAAAAATATAAATGAATAATTAACCT  
AAAACATTA AAAAAGAAAGAGAAATACATAAGGGGACTGAAGAGGATATTTGGGATATT  
TGGTGAGATTGTGTCTCCTTAAAATAAGGGAGATTTGGGGAGTGACGTGGCCTGCTCTCT  
ATCTCTAACTAACTATCCAGACCCTAACCCACTCATATCTATTTCTATTTCTCTCTCTC  
CCTTCTTCCACGTCACCCTCTACCCTTTTTGCTATCCTACGCCCCCTTCTCTTCTCTCT  
TCTTCGCACCTTAGCTCCCACCACCATCTATTTGGTATTTTTTTCCCCCTCAGATTCAA  
TCCAATCAATCCCTAGCACATAAAACTCTCATGTTTGTTCACAACCTCACTACTGGC  
TCAAAAAAAGTTTGATTTTTTTTTTTGGTTGAGCTGCTAACGTGCGCCGTCTCTCCAG  
ACCTGGATTTGCTGATGCTACAACGATCAGCGGATATGAACAAATGGGTTTTGAGTTTT  
ATGTGTCTTGACTGGGGGTGTGGTTGCAAGATTTGATTTGTATGGAGCTTTAGTATTGG  
GTTGTTGTTGTTGTTTTTTGTTAGTACAGGGAAGAGTGGTCACGATGGATGCTGAAACT  
GAGACTGAGGAACCTATAAATTTGAACGATAAATCAAGTAACTTTGGTGGGAATAATAGT

>Glyma06g19870 | Gm06:16214744-16216243 FORWARD

AGGGTACCTAAACAACGTTGGCTCCTAAAAATCGATGATTGTGCTGCCAACATACTCGG  
CGAGAACTACGCTGCAGGGCCACAGGAATAGGTCAATTCGTCCTTCATGTTCCGCGAGA  
AGAAGAGTAAATGTTAGTTGGTTGGGAATTCATGGAGAATGTAGTGGGATTGAGAAGTG  
AAAAACCTTGATGTTGGAGATGGAGAAGCTTGGTGCTTCCAGAAATCATTGCCGAAACAGT  
CTGAGAACCGTGGTCATGGTGAGACTGTCAATCCCAATCTTTCTCCTCATGGCTCT  
CATCGGAAGGAGTTAACTGAAACCTCCAAAATTGTCACGTTGGATAGTTTATGTGACACT  
AAAATTGTTAATAATGTATCTCACTAACGACGTTACTTTTAAATTTAACGGCAATGACTA  
TTTTGTA AAACTTATGCAAAGATAAAAACATTTTTTACATTTCAAAAAAATATGAACATA  
ATTTGTA AAAATGGATCAAAGTCAGAGATCAAATGCTAATTCAGTGTGAAAGGATTATG  
TACTCTCCTAGATTATGGCTCAATCTCCATTATAGATAGATATTAGTGAGTATTCCTAAC  
ACTTGCAATGAAATAAAATGATAAATTTTATATTTAAAATATTCTTTGATAAATAAAGAA  
ATAGGACATAAACATACAAATATCGTGTA AAAAATAAAGTCAAAGAGTACACCATAATT  
TGCTACAATGTTATGCAAATTTACAACCTGCCGAGAAATTGAGAAATTGCATGTGGGCAA  
AGGCAAATACTAAAAAAAAGAAAAGAAAAGATTCAACCGTGTGATTGTGTTGTTAAA  
GTAAGGATATGTTTATTCAAAGTTAGAAAAAAGAAAAGTATAGTATTGGATTGTTCT  
TTCAGTTTGTGGACTTTGCTTAAACACCAAAAAAATAAGTTAGAAAATCAAATCTCACAT  
TTTTTTAAATAAAAGCATATACAGTAGTATAATCTAAATCAATTAATAATCTGTCTGAA  
TAATATTTGATAATTGAAAAATTAATTCGCAACGTAATTCACGAAATTGCAATAATA  
ATAAAAGCAGGTAAAAGCGTGATGATCCAATCCAATCCAATCCAATCCAATCCA  
CTAACTAGGTACGCGTAGATGGTTTCAAATGTA AACTGTGTGAAAGTAAAGTAAACTG  
TGTGAAAGTCAAAGATGGCTCTCGGAAGGAAGGAAACAGAGAGAGCGAAGGTGGACCCG  
ACAAGATACGTTTGGTCTGTCTGACCATCAACAATGTTACTGTTAATGTTTTTTTTT

TTTAAAGATAAAAAAGTATGATTGTGACAGGAGAAGCGACAAGTGCAGGTGGGATAATCC  
TCTCTGCTTCATTTCCAAAAACAACAACAAGATCTCTCAGATTTTCGATCCTCCGAATCT  
CCCTCTTTTCATTTTCACATTCTTCTTATTATTTATTCACCCTTTTCCCCTAACCTCACC  
>Glyma07g05530 | Gm07:4170107-4171606 REVERSE

TCAGCAACACACGATAAACAGGTTAACTTGGTTCTATAAGGATGACATTATCACAAGCA  
TAGGATATTATCAATAAAGAATTTTATGATAAATATTAATTGCTAATTTGTTAAATTTT  
ATTAGGAGCTCACAAGACTTCTCTCTCCTTTTTTTCCCTTCACACTAAGTCAACTTTA  
TATCTTTTTGGTGTATTTATTTTGAAGGAGAAAAATAATACAAAAGAAATTTTATATT  
TATTCTATAGAATTCACATCTTTTACACATTATTTAATTTAAAATTTTCTCTTTCATT  
CTCTCTTCTAACTAAATACATCCTTAGAATGCATTTGTTAATATCTATCACTTTTAATA  
ACTTTTTTATAGTAAATTATGAATAGCTAAAAATAATTATATAATAAATACATAATAT  
AAATTATTTACTATAAATTTAAAATATAATTTATATGTTTAAATTATTGCAAATAAAAA  
ATATACTAAATTATTTATAATAATTTACATATTTAAAATATATAAATTTTAGTTAT  
ATAAAATAAATATTTATGTGAAATTTAAAATATTTATTTCTATTAACAAAAAATA  
CTAATCTATGTCTTGTCTATACACATGCATCAATCTATATACTGTATGAGCTACTGTT  
GTTTTTTTTAATCTTTTTCCGCTTTACTATTTCCCTTCTCTTTTTCTTTTCCCTCCTT  
TTCTCCTGCCATGCATATGCAGGAACTGCCTAGTTCTTTTTTTTTCTTTTCCGAGGG  
AGAGAACACTGCCAGTCCAATTAACAACTAAACAACGTGCAACTTAATATAAGCTTAAAT  
TATTAATTTGATTCGTACCTTATTTTTAAATAGTTGAATTTGGTATTTAAATTAATA  
TCATCAAATTTTTATAAATAAATTAATTTAGTCTTTAAATTTTTAAGAGATTCAATTTAA  
TCTTAAATTAAGAAAAGAAAAAAACAAATCAATTTAATCTACAAATTTTAAATAA  
TTCTTGTCTTAAAGTTTTAAAATTTTTAAAATAAATTGACTCAATTTTAAAGAAATTTGAG  
AATCAAATTAATTTTAAATTTTTTAAAGAATAAATTAATTTAGTTTAAAAATTTGAGG  
ATCAAATTAAGTCTTTTAAAATCAAATTAAGTCATTTAAAATAAATTTAGAAAATAAAT  
AAATTGTTAAAATAATTAACCTAAATATAATTAATGTAGCAAAAAGAGAATGTGAAAA  
TGAAGAAAGGAACAAGAAAAAAACTGAATTAATTTGGGATGCTCCACGTGTAGGCTG  
TACACCACGAGATCAAAGTATTATAAATAAAAAACCGGATATGACTGTGCAGAAAAATAT  
CGGCCGGGAGAGAAGACGTAGCGTCCGACATGTCCATTGGGTGGACCCCATGTGCAA  
TATTAATAATAACCGATGGTGAATGGTGCCACGTGATGACGAGAGTAGCGATGATCT

>Glyma15g15520 | Gm15:11936641-11938140 REVERSE

TAGTTATGGAGATACATTTCTGGAATATGTATATGTAATTCCAGAACATTTCCGGTAAAGC  
AAAATGGGTTTCTTCTTTAAGAAAAAAGATATAATATAAATTGAGAGGTACAAGAGGGG  
GGTTGGGAGTGTACTTAGGAGAATTGGGGGTGTGAATAACAAGAATCAAATCTAACTGGA  
TTAATTTGAATGGACGGGATCAGATATTAGGTCGAATCGCTTACATCCTTGTATACTAA  
CATATTTACTAAAGTTGAACTAAATAAATAATATAAATAAATTTATATAATAAAAAA  
TTACTCTTATAAATTAATAAATGTAATTTAATATCCATACAAAGCACAAGAACTAAGC  
TACTTTATTATAAATTTAAGTTATATAACATAAATAATTTATCCCAGATACAATACTAGTT  
ATATAAAAAATAGTCAAACAATTCTATACACTAACTAACTGTTTAAATTTTTAAAAA  
TTAAACTTTCAAATATCTATACAGATTAGGAAAATAAAAAAAGTTATTAGATCAAATA  
TAAAAAACCATTTAATCTTTACTTTTTAAGTAATTTAAATATTCAATGAACATATTC  
ATTCTCTTTAGTTAATTAACACTCGATTGATGAACAATATCTTTTTATAAATAATAG  
AATAATCATTTTAATAACACTTAATTTATACCTTTTATATCCTACCTATAAATTAGGAGC  
ATGTTTTACTCCCCATTTTAAATATTAATTAATTTACCATTAAACCAGAAGAGAGACTT  
GGGAGGAAAAAAAAAAGTGAATAAAGTGAAGAACATTGAACATGTTCTTAGCTGAGTTGT  
GATTTACTACTTTAGAAGTGTGTTGTGACCTTTGAGACAGCGTTGGAAGTGGTTTGAGA  
TCCGAGGTGGAGGGTTAGTTAATCCAATCCAACCAATGAGCTGGATCCACTCTTTCAGGA  
GTGAACACCCCAACCTTCAAATATAATTAAAAAATGTCAAAAATAATTACACAACACT  
AGCATTTTAATATTACGTTAAGAGGTATAAATTAATTGATTGAATAAATATAATTAATTT  
AATTGTTATAAATTTTTAACATTTTTCTATTTTACGTATGCAATTTTTTTTTATATTT  
TAATAGTAGTGCATTTTATGGAAAGTAATAAATAATGCCCAGAACTGAGCATCGGCTTG  
AAACAGAGAAGGCTTTCAGAATCGGCTTGAATCAGACCCACAATCATTTCATTATTTAT  
ATGCTATATTATCTGCAGCAAAAATAAATTCATTACCCTTTTCTCTGTTTCTTCCCCT  
GAECTCTTAAACAACACTCACTCTTTTATTATTATTATTATTATTATTATTATTATTA  
TTATTATTATTATTATTATTGTTGTTTCACTACTTCCATGATGCCAGTTTCAACCATGT  
GAAGTTGTTGTGCGTGTGTTTGTGTTGTTGTACTGTTTTGGACCTTCAGAACCAACC

>Glyma11g21650 | Gm11:18788152-18789651 REVERSE

AAAATGAAATATTTGCAATTGCTTAATCACTCACACGATCCTGCTCCAGTTATATATATC  
TTTTAAAATAATAAATATTGACCCCTGAAAAGAAAATTTCGAGATAAAAAAAGGAATAAT  
TGGAAAGTCAATTATATATGCCGGTGACAGAACAATGCTGATTTTGTGACAGAGAAGACA  
AAAGAGTATTCTTTTAGGACAGCCTAATTTGAGAGGGTAATTTTGAATATCAAAGGCTT  
GTAECTACCATTCTTGCTAAATTCTTCTCTAATTATTTAATATTAGAAAATTTAAAA  
CTCGGAAAAGAGAAGCAAATCAAATAGGGTCTACGAGTAAATAATTAATAAGAAAAAAA  
CTAGAATAGTGAATGTTCTAAGAAAGAGCAACAGAATCGGTTAGGGACCATTGAAGTTT  
GAAAATTCTAGTATATTGTTTATATGAGGTCAATATTGGCTCTTAAAAAAGGACTAGAT  
ACAAACATTTTCATAATAGTAATAAAGCAAGAAAATTACGTTTTGTACTGGCTTGTATAGT  
TGTAAGTACGTGGGTCACCTAGTGCTAGGCAGGTCATGCACGTGCATGGAATAGAATA  
GAGTCCACACGACTCTGATGAACAGTGAACAATGATGGTTTGGTCTCGTGAAGGGCAAT  
AGTAGGGGGAAGAGAACAGTGTAGCACACCCCTATAGTTTTATCTCTTTTATTAATCACC  
TTAATTACAACATTTGATTATTTGGTAGGAATTAATATTTTTATAAATTTAACCATT  
TATGTCATACTTAAGATTATATTAGACAATTTAACCGGAGGCTCAAAAAGTTAAAAGACA  
GCTAGAAGTTAAAATTTATTTTAAATTTAAGTATTTCGATAAAAATTAAGTCAAAGTA  
ACTTAAAAATATAAAATAATATATTTAAAAAGGATTATAAAAATTTAAATAAATTTTTA  
AGGCTAAAAAATAACAAATAAAAACTAGAAAGGGACATTTTTAAAAAATTACTTCAAT  
TAGTGTTAAAAAATTAGAAATTTTTAAAAAATTATTTATTGAAATATACTTATTCA  
CTTCAATAATTAACTAAAATATCTCGTAGAACATAGTTTAAAACTTATTACATCTCCTCA  
AGAGTGATTTTTTTAGAAATCAAACCTCAAATATTCTCTAGTAGCGTGTGTTATCAATTGA  
ATTATATTTATTCACTTCAATAATTTTGTCTTTAACAATAAGCAAAAGGGTCAAATAGAA  
TAATAATAATAATAATAGTAATAAACAAGTCAGATTTTGGTACAATAAACAG  
CACCTTTCTTTGCTTGTGTTTTCAATTCAAAATCAACCCCAAGATCCGCCAGATTCTT  
GATGAAATCTGTGCGATCTTGCTTTCAAACCTGTCAGATTTCTTGGTGGATTTTTGTAT  
CCTTCTTGACCATGATGTGTGCCCCCTTTAAAATGTGCATGCCACCCTCCTTCATCTC  
>Glyma06g12100 | Gm06:9319364-9320863 REVERSE

TTTGTGATGTATAACGAGTTGATGGGCTTGAGCATGTGAATATATATATTTAACATAAAA  
AATACAATTTCTTCACTTTTTATAAGAAACAGATATAGACGCACAATATTTTCAGTGCCA  
AACGTCACAAATATAAAAAGAGATCAGCGGCCCAAATCATTGGGTTACATGAAATGAT  
GAGTGGAAATTTTTTCAATTAATTAACTTAATTTCTATAAACATTTTGAAGAAAAAAAAGC  
ACTGAAATGATGATAATAAAATGGTCCAATTAATTTAGGGGTCACATCTACATTTCCCA  
GCGAAATGTTAGGCTAAAGTAAAGTAGGCTGAGGTAAGATTATCAGTTAGTTGGAGGAAA  
GTCACCAAAATGATCTTACCCAATGCATGCACTTTAGATTTTACACACAGCACTGTGTAT  
TTTACAATGGCAAAATTCACAAAAGTGGGTAGACTTGGCAAGAATATCAAATAAGGTAA  
AAGCGAACAAAAATAAACCCCACTCATTGCCCCAGGAAAATTAATATATGCAGTTGAGAA  
AATTAAGAGGAAAGTAATAGCGGTTTAACTATCTACAATGGATATAATAAACTAATGTA  
CGCCGAAATTACCTCAATAATCTCCTTATAGATGGGTTTTTCACTCTTACAGAAAC  
TTGATAATTGCACCTCCTTTTTATAAGTACACCCCAAATATTCTTTTTAAATCTTAAA  
TACTTATTATCCTTTCTTTTATCTCTCATACATTATTTCTTTAACGCATAAAGCAATGG  
TATTATGTGTGCATACGCGTGGATATCATACCAGTTAGTTAGGAAAGAAGGTTTGTGCTT  
TAATTTTCAAGGTGACGTACTCATGCACATATGTAATTAATGATAAATGCTAATTAAT  
ATTCTTAGGATATTGATCAAATTTTTAATTGAAATGTTTAAAATTATATTGTTTATAAT  
TTATTTTACATTCTTTTATGATTTTTATAGTATTTTTTTTTAATTTCTTAAAGTATTGAT  
TAGCATGACCGATTAGAATAAGCCAATACTATCCACACCCCAAATTAACCTGCTTTCCA  
TCATGATGATGACCGAATGGGAACAAGATCTTGGGTTTTTTTCTTAGCAATCAAATAAA  
ATCCAATTGAAAGGGAAAAGAGAGAGAGATTTTTATGTGTGGTGGTTGTACCAACGCGG  
TAGAGAGAATCTAGGGAGAAAGATCTCAGCATGAAGGCACACACAAAAATAACACCACAT  
CCATGCCACTGTGCCACCACAGTTTTTTTTTTTCTCATGCACCCACTAATAGCAAAACCA  
AAAAAAGAAAAGAAAAGCTAAGAGGGATAATTACATTCCACCTCTCTCCTTCC  
AATTCTCGCTCTGTCTTTCTTTCTTCTCTCTCCTGCGTGGCACTGGTCATGA  
ATTACTGATATATATTTATATTTAACCACCTATATATATTGTAAGAAAACACAGATAGT  
>Glyma15g37770 | Gm15:43725912-43727411 FORWARD

AAAATCATTGAGATAACATAGTTTTCCCCAGTAAAGTTGTTAATGTTGACCCCTGAAGA  
GAATAAAAAAATGGGGAACAGATGAAGAGTTGGAAAGTCAAATGAAAGAACTAACG  
CTGATTTTGAACCCACATAAAATACTATGGTAATGCTCGGAGACTAAGCATAATTTAAATTT  
CAAAGAACAATAATTTATTGAAGTTTTATATTCAAAGTTTTAATTGCCAGTCACTATTG

GTTGAGAGACTCTTGATATTGTGAAAAATCAATTATAAGTAGTAAATAATTTAGTGAAGT  
TATTATATTCAAAGTTTTAAATTGGAACGTGAATCACAATTCCTTAAAACCTCTTGATATT  
GCAGAGAATTACATATAAATGGTAGTTAATTGTGGTGTATCCAAAATTACACAAACCAT  
TTTTTAAAACCATGATTATAATTAATAAATAATTTAGTGAAGTTGTTATATTCAAAGTTT  
TGAATTGCATTGTAATCACGATTCGTTGTGACTCTTGATATTGCCAGAAATTATGTATAA  
ATGGTAGTTAATGCGGCTGTAATTGTGGTTCGTATCCAAAATTGTGCGAACCATTTTTTAA  
AACTTTGATTATAATTAAGTTTAAAATCTTTGGTAAATTTTCTCACTCGAAATATTCA  
ACTGTACTTATAGGTACGTCGTTCAAGTACATGCCTAATTTCCACCTTATTAAGTTGT  
GTGTAAGAAAATCTCCAAAAAAGTTAACCTTAAACGTATTGTGTATGTTTTCCATTTAA  
ATAAGATTGTCTTTTGTAAAACCAACTGTGTTTCCAGATAAAAAAAATTATTTAAAATG  
TGACCAGTAACCACCAAAAAGAATAAGATAAAGAAAAGTATATTACACAAAAAAGGAATGAT  
ATATGAATTAATAAGACAAATATAATAGAAAAGTAAAATAAGATGGAGGTATATGTTT  
CGAGGATTGATTCTCCCTTGAAAAATTCTGTATGGTTTTGGTCCAAGACTCCTAGTTGTC  
CTTTAAAATTTGTAAAAGGACAAACAAGTCAATAGGAAATTATAATTCTTGCTAGTATTT  
CTAGTAAATGGGGTTAAGTGCAAAGCTAAGCAGGTGCATGCATGCATGCATGCATGCATGC  
TATAAAGATTTTTTCTGTCTCTAAACAATGCCCTTTAGGTCTCATGAAAAGGCAATGG  
AATGAAAATAGAAGTATTATCAATATTATAGTAAACCAACTCACCCAACAGTTGCTTAT  
CATTGGCAAAAGGGTCAAACAAAATAATAATGAACAAGTCCAATTTTTTAAATTTGGTAA  
AATCCACCACCTCCTTGTGTTGTTCAATTCAAAAATCAACCTAGAAGATCCTTGAG  
ATTCTGGATGAAATCTGTGGGATATCGCTTCCAAACTGTCAGATTTCTATGAGGATTA  
TGTATCTTCTTGATCATGATAGTTCCCATTTAAAATGTCACACTCTCATTCAACTCATT  
>Glyma19g44970 | Gm19:50242432-50243931 FORWARD  
CTTGAGGGGACGGAGGAGACCGTCGAGGAAAGTGAAGTGTGGAGCGACCCAACCTTGA  
GAAGGAGGATGAGGTAGCTGGAGTAAGTCCAAGATTTCTTTGGCCAGAACAGGGTCTGAT  
TCGGAAGCTTCTTCTGCTTCTGCCTATACAAGTCAAGCGCTTGTGATGAATTCAACGACG  
TGCAACTTACAAGTAAGCCCGCCCAATTTCTAGAGTATTTTCGTCCATGAATGGGGCAGC  
TTGAATTGGCACAACAGCCGCCACGCTTTTTACAAAATTTCTTAACCAGTTACAGTTTT  
AAAAATCACAAAATTTATGGATTTTTCATTTTATTTAATAATTCTTTAACATGATTTTA  
TAATTTAATAAGTTTTAATCAATAAAAAATGAAATAATAAAGTACTTAACAAAATTA  
CTCAAACCTTTTTTTAACATGGGATTAATAAATAAGATAATTTTTTTTTTATTATGATA  
TTGATGTGAATTATTTATCAATTTTACTAAAAAATAATTTTTATTAAAAAACTTATTAAT  
ATTCTTGATCATATATTTTTCATTTATAAGATTCAAATCAAATATTTTATTTAAGAAAAT  
GCAACTTAATATCATGAAGACCACCAACTTGTTAGTATCAACAAATTGTTCTTAATAAAC  
TCTTTTTGTACAAAGTCTAACAAATAACGATGGTTAATATCTCACAAAACATGTGGTACA  
AGCTTCCCAAGCTTTTTGGGAGTGGAGAGAAAGCACACCTTGTCCATTGTCCAGGGTGGG  
ATGAGTTGTTGGATACTCGCGAGTAAGGCTAAATTTGTCATCATCTTTTATATTTTAAAT  
TTAAGTAAATTACACACACCGATTAATCATTATTCTGAATTCTAGCCGTGTCCGCTCAA  
CATGATTTGATGTCTTTGAACTGAACGTGATTAGTTTATTCCAAGATTTTATAAGTAAAT  
AAATGATGATACATAAAGTAAAGTAAATCAATTAATAAATAAATAAATAAATAAATAAATA  
TACAAAAGATCTTAAAACATTTTATATAAATAAAGTAAATAAAGCAATTTAAGCCTTTTC  
TGTTATATCAACTGGGTTTTTTTTTTTTTACCAAACAATTTGTCTCATTGAAGAAACCAT  
GGCGGGACCACTAATGAGATTTTTGGCACGAAACGATTTGCACATTTGTTTGTCAAGTGGG  
TAAATTTGAACAGAAACAGTGAATACAAGGTGCACAAGGGTTACGTAGATTAGTTAGA  
AGTTGCGCGAAAAATAAAAATGCGAAAAAAGAAAACAAATGGTGGCACAAGCAGAGACA  
AATGTAAGCAAGAGAGAAATAATTGAAGTGGTGGTGTGTCAGGAGAAACAACAGAGAAT  
CAGGAACGTTCCACGTGTCAGAGTGGCCACCGGAAATCCAAAATGTGGTAGAGCATTAC  
TGACGTGGGCAAAAAAATATCTTTGAGGTTATTATAATTATTTATTGAGTTGCAGGCACGT  
>Glyma06g14750 | Gm06:11559595-11561094 REVERSE  
TCGTAATAAGTTGACTTAAGGGTCAACTTAAGCACAATTAAGTTGAAGGTCAAAATTCC  
CTCAAGTCCGCTTAAGCTATAACAATGAAAAATTTGATCTTTAGGATAAGTTGATTAGGC  
TGCCAAAATTCGCTCCCTTAAGTTGAAGTCAATGATTTCAAAGATCTTCAAATTTCTAGG  
TTCCAATGAAGCTCTTCAAATAATCTCTCAAATTTTCTTCAAAGTGGTCCCTACAAA  
CAAAACAAAACAAGCGGACATCAAATGAAAAAACAACAAAATCTAAATTTCTAAC  
TAACAAAAGCATTATTTCAAGCTTTAACCAAATTAGGTACAATATATCTAAAAAGTAT  
AAGAGATATAAATAATTACCAAAAATACCGCTGAACGCAAGTATAGTGACAATTAAC  
ATTTATACCATTATGGAGATTTTTTTTGAAGTTACATGGCAGAGTGAAGAAAGGAACAT

GATCGATTAACACTAGACGAATTTAACTAAGAATGAGAACAAATATTTTCGAATTATCCAC  
CAACTTGTTTAAATATTAAGGTATAAGTTTTTTTTTATATGGAGGAATCAAACCTCAAGTA  
CTAAATGATTTATACCAATTTATCCAAGTGAGTTAGATTCTAAATATGTATAAATAAGG  
TATAATTTCCAATGAACATTTAAGTCATTTTTATTTTTGTTAGTTTGACCTTAGAGAGT  
TTTGCATGAAAATATCTATCATATTGTTAATTGTTGTAATACTAGGGTTAGACAAATA  
TTTGACAAAATCATCTTATACATTAAGTTTTTTTTTTTTGAAATATTGTATATCAAGTCA  
TTGAATGATGCAATACTTGTTAAGTTGCATGAATTTAATTTAACCCTTCATCTTATGTA  
AGATTTAACTTTATTATAGCAATTATATAAAAATAAAAAAATTGGACATTCACATACTAT  
TGTGAAAAGGATAAAAAGATAATTAATCAAAAATGTCCTCTCACCCCGTGATTGGGTGCG  
CCAAAATAGATAAAAAAAAAAACAAAAGAAGATAGAAAGCAAAAATGTGATAAAAAG  
TGAGTCTTAAAAGGTCCAGAAATAAAAAATTAAAAAACTGAGAGAGAGTGAATTGAGAT  
AAAAATTTAAATTAATAAAGTGTAAAAATATGAATTTTTGTATTCTATCTTATTAT  
TCATTTGGCTCATTTTTGGGTTCTTTTTCTACATAGGAGCAAATCCTAAAGGAGATA  
ATTAATATAGCCATGAGGGTATTTAGTTTTTTCGTTTTAAGCATATACTACTATCTTAGG  
AGAGAGAGTGGCGGTGTGTGAGCATCTCACAAACGTGCATGAATGCTGAGATCAGAGTG  
CAGACAGTGTCTGAAATCTCGTCAAGAGAGACAAAATTTAAGATAGAAACTATAAAT  
GAAATGAGAGAGAGAAAGAGAGATGAATTGATGATAGATGAGATGAGAGTGTAGGCTTG  
>Glyma08g40330 | Gm08:40029233-40030732 FORWARD

ATAAATATATTTATAGTATAGTCTTAAAAAAGCTGAATTATTATTTAAGTTGAATGATT  
ATTATTAAGTATTTTTCAACTTAAAAATAATTAGTTTTATTCAAATTGAATTGTTGAAT  
CTTTTTATTATTTATTTATTCAGTTAATTTTTGAATTAATTATTATTCAAATTTTTATTCAA  
TTAATAACAAAATTTTTAAACATTTTTAATCTTTACTAACAAAATTGTTAAATTTGTAA  
ATATCAAATCAAATCACACATACTTAAGTTGCCTATTTGATTCATTAATTTAAATA  
AAAACCACATCAAACCACACTCCTAACACACTGATAAACAACCTGTTTAAATCACACCTT  
TTAAAGAAATTTTCAAAGAAGAAAACACACTCGTTTTGTCACCAATTATCTTGTCCGCG  
AAAGAAAGAAAATCAGAGAAGCAATAGTGTGCCGGAAAAAGGGTTGTTTATGATGCTT  
CCATTCCAGTCAAGGAGTTGCATGGACCGGCACGGGATTTGACGGCGCGGTTTTGCAAA  
GCATTGACTTTGGGTCAACCAATCCGACCAATCACTGTGTGACATGTCATCTCTTCGCAC  
ATCCAAAAATTGACCAAAATCTCGTCAATCACACGCCATATATCATTCTCATCACAAA  
AATATTATAAAAAGTTTTCGGTGATACGGAGAGATCATTGTTCAAGTGGATTTCAGAATC  
TCAGCTCCATGTCTGAACATTAATAACAAGAAGAAATAGGGACAGTGGAGAT  
TTGCTTTTGCAGAAAGGACTTTATATTATAGAAAGATATTAATTGATATATGGTATAGAA  
AATTTTTCAATCATAATTCAATTATTTTTAAAAAAGATTTTTTTTTAAAAAAAATTTA  
ATTTCTTTAATTATTGTTAATTTATTTAAACATAATATATATAGTTAATTATTTTCAAC  
AAAAAACTATATTGATGATTACGATATATTTTTTTAAGTTTTTAATCATTATGAATTA  
TGTTTTACCATAAATTGATTA AAAAGTATTCTTAAATATGTAATTATTATAAAATTCAT  
AATTTATATTATAAAAATCTCTTATATTTAGAAAAAAAATTCTTACAATTTTGGTAT  
CTATAAGTAAACGGTCATTCCCAAAAAATGAAAAATGAAAAGTAAAATTAAGTAATAACT  
TCGTTAAAATCTTAAATAAAGGCATATTTATGATTTATAACATCAAATATTACACTTTTA  
GTAACATTTTTCCCTCTCAATTTTTCAATTGTTAATTTAAACTTTTTATGATCTTTTTTC  
TAACAAGTATGAAAATATTTTATTTCCCTGTCAAAGTTTCCCATAAATGTGTTTCACAA  
AAAAGTGAAGAAAATGACGACGTGACATGATAATTGATAGATTGATAGAAGAACATAT  
CATGTTACATTATTATATTACAATAAGCTGTATTTAAGATCTAAGCACCCAAGTTACGTT  
>Glyma13g03560 | Gm13:3559376-3560875 FORWARD

ATAAAAAATTATTAATTCTAATAGGGTTGGGTGCGATAATAGTGAAGATGAAAGAAATAT  
TTGTGGAGAAAAGAAAACATAATGTTGTGGAGAATTAAGGTTATTAATAATTTATATGA  
AATTTTTAATACTTAATGATTTTAATTAACCTAATAACTCAATTAATCATAATTATTAAT  
AAATAATCTTTTAAGAGGATCAAATCACCAATTTATAAAATTAGGAAAATCAAATATTA  
CAACTAAAATTTAACAAGACTAAAATCATGGATTTCAAAGTTAACAAGATCGGCATTAT  
AATTTAACCAAAGATTTAAACTAATTGAAAATAATTACTATATATATATATATATATAT  
ATATATATATATATTATCAAATAAATTATTATATTAATTAATGATTAGTATATAATATAT  
CTCTGTTTTACAAGAAAAAAAAGTATAAATTTTAAATTAACATAATTTGAACATCTATC  
AATAATTTCTTTCTTATGCATAGCTATCAGAGTTTGACTTTTTCCCTAACATACTAGAAG  
GGTCTAGCATGTGAACACACTACACAATATCAATAATTTCTTCATGTTTACATCATCGTG  
ATAAGAAAGAAATCATGTTGAATAAAAAGACCACCCATGCATAGAGAAATACTAAGCTAA  
GTATCTGTTAGTTGGATCATAGTCTTCCCAACCCATGCATGCCTTAAGATTTTTTTTTT

TAAAAAATGCATGTGATAGCAGTGAGCATTATAAAATGGAATTTAAAAGTGAAATAGAA  
ATAATAAAGTTAAGACAAGGAAGAGACGAATCCTACTTACCTTCTTACTTCCTCTTTTTG  
ATAAGTATTTAATGCATTATATATTTCCAATATATTAATACATTGATATTTTCTAATAC  
TATATTTTTAACTAGTAAAAATATTTATAAAAAAAAAGTTGCAGAAAGATATACTATTA  
CTCACAATAATTTATCAAAAAAATTACTCATAATAAATATTGAATTTGTTATAACTATTA  
CTTCTAAAAACTTATTTTATCAATAACAATCAAATCTTCTTATTGAACACAAATCCAATC  
AATTAATAACATTTGAGAAGAAAAGAAAAGCACCTTTAACGAGGTAATTAATAAGAAAGA  
AGGGTTGCCTTAATTTTCAAAGTCTTTGACAAATATAGTCCATTAATCCAATCCACACCG  
AAAATCAACCCTTTTTCCACCATGATGATGATCGAATGGGAACAAAGATGTTGGCTTTTT  
TCTTCTCCCCCTAGCAATCAAATAAATCCAATTGAAAGTGAAAAGAGAAAGAAAGTTA  
GGAGTGATAGTTGAATTAATAAGGTAGAGAATATCTAGGGTCAAAGATCATAGCATGAA  
GCACACACAAGTTTGTCTGTGCCTCAACAGTTTTTCTCCTCTCACGCACCCACTTTT  
ATAGAAAAAAGCTAAAGACAGTTACATGCCACCTCTCATTCTCATTACCATGTTTCTCT  
>Glyma17g16360 | Gm17:13035936-13037435 FORWARD

TTAATTTCTTATTTTTATATTTTTAAATTTGTTTAAAATTACATTTATCATTCTATT  
TTCAGTAAAAAAAAGAAAATCAAATCAAACACAGCCCTGCCTACTTGCTAGTCGACGATC  
ATTTTCATCGGATAATATTAATGAACGATGATTGGGCACCGAACAACCTTTGAATGCATAAA  
CCATTATTTTAGAGAAATAAATGCATAATAATTATGATAAAAAAAGAAGTACATTAATGG  
CACTGATGAGGAAAGGACACGTTATAAAGTTTCCATACTTCATCATGAATGGTTAAAAAA  
ACCCTCTCTAAATCTCTAATACCAATGTCAATAGGATACTTTTACTATAATGAGTGTGTT  
TTCCTGCAACCATTTTCTTCTTCGTCGGTTGATTGGTGAAGTTGCTGGTGACCCAGAA  
GAAGGGGTAGTGTGGAAATATTATTGTTAAGCTTTGAACTTTGAAGTAGTGGCAGAAAGG  
TTCATTGACCCTTTTTGAGAGACTTACTTGTGTTGGTCCGAACTGCTGATTGCAACT  
GTTCAGTGGTCACAGGAAGCACCACCCTCAAAGCCAGCACTTAAACCTTCTCTCTCT  
TCCGTCTCTCTTCTTACCCTTCTGTTTTTATTAACAATGCAATAAGAGGAGAAAGAAAG  
AACACAAGTTTAATTAGCAATGAAATTCAGAAGCATTCTTTTATGCCAAGGTAGTGA  
AAATTGTTTACACGGAACATTTTTTTTTCTTAATGTGTTTTTTTTTTGTTTATTATGTG  
CATGCTCTCTCTCTCTCTTGGATCAAGTTCAAGTGTTCATCTTTTCTGCTTCTTTGAA  
TTTTGTACTTTTTGGATTAATAATCTGCATGCATGTCTACCCTTTTGAGCCTTCTGCTT  
GTTTTCTGGATTCATGGTTATGAATTGCTTGCTGACCCGTTTTTTGTTGTAAAGTTTTT  
TACTTTTGTTTTTCCACTATTCATGGTAGCTGAGCCTTTTCTTTTTTATCTTCATGAGAT  
CTCAATTACTGGGATTGGAATAATTGTCTGTTTGTGTTTTGTGAAAGTGGCATTAGCCAA  
TGAGATCTTTGGAACACAAAAGGGGAGGCTTTTGATTCTGTTTTGTGTACAAAATGCTTC  
CAGAAAAATTGGTGGGAATATATGTTTTTTGTGATTTACCAGCTGTTTCATTGGTGATCA  
AAGGGCATGGCAGTTTTGATAATTTGATCTGAACCTTGTGTTGGGAGTTGATCTTTAGAT  
GGCATGCCAGTGTCTGCATTATGTGTTAGTTATTTGGGCCATTTAACAATTTAAGCA  
TGCAATGAATGGAGTTTGTGTTATGTTTTGTTTTTAGTGTGTTAATCTCACGCTGAATT  
CTAGCTTACTGAATCAAGCTTGTGATCTCATGGTGTGCAGAAAGGAATTAGATGCTGATA  
AGTGGTATTGATCGATCTGTTACTTTCTGTGGGACTGAGAAACGATGCCAAGCCAGCT  
>Glyma12g07860 | Gm12:5496698-5498197 FORWARD

TTTTTTTTCTTTGATTTTGATTTTTTTTTCTGTTGTAGTTTGTGTTTTTGGCTCTCTA  
TTTTCGAAACGAGATTGGAGCTCTGACTATTGTGGTTTTTGAATTTTTTTTTGGATTGTT  
TTTTCCAAGTTGCTGCATCGCGCTTGCAAATGGAGGTTTGGTTCCTGTGAGTGAAGCTCT  
GAAGGTTTGTTCATAGTCCATGATTCTTCTTTTTTTTTTTTTTTTTTTGAATTTCTAATTC  
TCTCTTGCTGTGATTCCATTGGAAAAAAAACGGTTAAAACGCGATTTTAGATCGTG  
TTTTCTGGAACCTTTTTTGTCTGTTTGGTTTAGATAATTAGAACTTCATTGGTATATT  
TGTACGAGACATTTAACTGTTTTACGTTTACTCTGTTTTTATTCCCTAATTTCTGAAGT  
CTGTGCTAATACATGAAAAATAATCTATGAAGCGTCTCAGCATAATCAATTAATTATAAT  
TTTTGCATCAAATTTATAGTAATTGATTTATTTCCCTAGAAGATTGAAATAAAAAATGGC  
TCTTCCATTTTTATACCTGTCCTTCAGTGCATCTGGTGTATATAAGGTGGATAAAAAATA  
TCTGGGAAAAAGAAAGAAAAACTAAGAAGACGATGTTTTAGATTATAACTTTGGAGTTTT  
TGTGTTTCATGTTGTCTTATTATATAAGCCTCTAACTATTCGAACCTTCGAATTTCTGA  
GGTCTGCTGATGTCTCCATGTAAGTAATCTTGTGAAGAGTTTCTCATGTATGCATGTCT  
AATCAGATTTCTGCCGAGTTTCTGTAAGGATGGTAAGTGAGTTTATTATATTTCAT  
TTTCTCAGGATATTGGTATGAATGGAAGTTATACCTAGTGCTGAGACAGAAGCTTTGAG  
GGTCTTTGATGCAGGAACAGGTTGTCGTTCCATTTCTTAAATTTGCTATGAAATTTTT

GTTTTGAGATTTTCATTTCTGTCGGGGGGCTGGAGTTTGGAGGTATGGATCTATATTTT  
TCTATCTTAACTTTTTCAAATTACTACTATGTAATTATTATCAAGTCTATTTTTGTTATG  
TTTAGTCTGTTAACAATTACCATAAGCAATTACTGATTTTATTCCTTATGATATTGTGTA  
TATGTAAATTTGTTTGGGCCCTTGGGTGGAGTACCCTCAGGTATAGGGTATTTGGTTTT  
TTCTGAATTATGATGGAAAAGCGCTGACTTGACTGATGGATAGGGTTGTGTTTGCAGAA  
ATTGATAGTTCAAGTGCTTGGGATGTGGAGAATCCATGATTCACTTGGGGAGGATATCAT  
GTTCTGTGTTAATTCCTCACAATGTTTTGCAGTGTGGTTGATATAGGCTGGTCCGATG  
ACAATAATGTTGGGAAAGGGAAAAAGGTTTGGCAGAACAAAATCATATGTTTTTGAC  
AAAAAGAGTCTCGAAAATGGAGTAGTTAATGGAGGGGTAGCCTCTGGATCATCAACTGAA  
>Glyma13g22320 | Gm13:25866825-25868324 REVERSE  
AAAGGCAACATATTTGAAGAACCCATTTATTATAACTAGATATGATTAATTTCTATGCA  
TGATTGCTAAATACAAGGTGTTTGTGAGTGTAAAGAATAAAGCATGTTTTAATATTTTTT  
TTAAATGATATAAAAATACATATTTTTATCATAAGAAAACAAAATTAGTTTTCTGTATT  
AATCATAAATAATTTAAGTATGAAGAATAAAGAATATATTAATCATAAATTATTTAAT  
TAAAAATTAATATTAGTTAATTATTTTTATAATTTTTCCAAATTTTTATTTTTAAT  
ATTTTTACTAAAAATATTTTAACTAAAAATGAAATATTATCTTAGTAGGAAATCAAGT  
TTCTTATTTAAATTATTTAATGTAATTATATTAGTTATTTAATTTAATGAGTTTAATTT  
TATAATGGTCTAATGCGTTAAGCTCACAGACTTTTAAAAGTATGATGATGAGTTTAATGA  
GCCAATACATATATTGGACCGTTAGAAAATAATGGAACCTTAACTGATCATTACAGAAGG  
AATTAATTAATTAAGTTCTTAAGGAGTATATCAAACACAACGCAGTTTTCTTTCTTCC  
TCACCAGAAGATAAAGTGATAGTCTCTCTCTTGGAGACATATTGGTTGAAGAAGACCAC  
ACACCATCCTTTTTAGTACAGGAGATAGTTGATTGCATAGATATTATATTCCAATCAACT  
ATTGTGAAATCGAAAATTTATCCAATTTACAATCCTTGATATTTAACGCCATTTAAAT  
TTTAGAACTTTTAGTATTTTGTGAGTATTGAAATCTAGAATTTTATTGAAGATTTAA  
AATAAAGTTTGTCCAACATATGATTATTGTGTAATAAATCCACCCAACCTTATGCTTGT  
TATTTGACCTTAATAACTAAAAAAAATACTTTTTTTCTTCTCATCATAGTATTGATA  
AAAAATAATTCTATCAAGAATCATAAATATATACAAAATATATAAATGAATATTTTTCT  
CTTAATACAATGTATTTTCAATTTATTTAAAATTAAGATTAAAAATCTCTCAATATTAAG  
AGACATGAGTTACTATCACTTATATTTATCCTTTTCGGTGAACATCATTTTTGTAT  
GTTGAGTATAGACCTCATTGTGCTTATGAAGTAAAAAAAAGAGAGAGAAAAGAAAA  
TAATAAATATAATTAGGTGATGTATTAATTAATAAAGGAAATAAATGGAAAAGAATGCGGT  
TTAATGAATATAATTACCTACCCAAATTATGTCGTTTTCTTAACATATTTTTACACGAA  
AATATCATCATCAATCAATCTCGTAGTCGTAGGTGGTTTTGTTGAATATAAAAAGGGT  
AAGCCAGGTGCATTATTGTATTCTGCATTACACAGGCAATTAACAATAATTAAGACA  
AAGACTAACTCTGTTGTGTTGGAAGAAAAAGTGAACGACAGAGAGAAGAGCAATGCCAT  
>Glyma13g26770 | Gm13:29986546-29988045 FORWARD  
AATTATATATTTTTCATATTAATATTGACCCCTGAAGAGAATAAAAAAATGGGGAAACA  
GATTGGAAAGTCAATGACATTCTAATGAAAGAACTAACGTTGATTTTGACCCACATAAAA  
TACTATGGTAATGATCGGAGACTAAGCATAATTTAAAGTTTTTTAAAAAAGAATAATTT  
AGTGAAGTTGTTATATTCAAATTTTAAATTTAATTATAATCGAGATTTCATTGCGACTT  
TTGATATTACGAGAAATTACATGCAAATAGTAAATAATTTAGTGAAGTTTTTTTATATTC  
AAAGTTTTAAATTGTAATTGTAATCGCGATTTGTTGTGACTCTTGATAATGCGAAAAT  
ACGTATAAATAAATAAATTTAGTGAAGTTGTTATATTCAAACCTTTAAATTGCTATTG  
TAATTGCGATTGTTGTTACTCTTGATATTTGAGAAATTATATAAATGATAGTTAATG  
TGGCTGTAATTGTGGTCGTATACGAAATTGCGTAAACTATTCTTTAAAACCTTGATTATA  
ATTAAGTTTACAATCTTTGGTTAAATTTTCTCACTCGAAATATTCAACTGTTCTTATAG  
GTACGTCGGTTCAAGTACATGCCTAGTTTTCCACCTCATTTAAGTTTTATGAGTAAAGAA  
AATGTCCAAAAAAGTTAACCTGATCGTATTGTGATTCTTCCATTTAAAAAAGATTTT  
AAAGTACGTATGACGAGTAACCACAAAAAGAGTAAGATATTTAAAGTATTACACAAACAA  
GGAATGATATATGAATTAACAACAGACAAATATTATAGAAAAGTAAATAAAGATTGAGT  
TATGTTTCGAGGATTGTTTTCCCTTGA AAAATAATGTATGGTTTTGGTCCAAGGTTCCA  
AATTGTCCTTTAAAATTTGTA AAGCACAACAAGTCAATAGGAAATTATAACTAGCT  
AGTATTTCTAGTAAATGGGGTTAAGTGCAAATCACTAAGCAAGTCATGCACATGCATGAA  
TGGTATAAAGATTTTTTTATTTTTATTTTGTCTCTAAACAATGCCATTTAGGTCTTATG  
AAAAGGCAAATGGAATGAAAATAGAAGTATTAATTATTATAACAAACCAACTCACCCCAA  
CAGTTGCTTATCATTGACAAAAGGGTCAAACAAAATAAATGAACAAGTCTAGTTTTTT



AAATTTGGTAAAATTCCACCACCTCCTTTGCTTCTTGTTCAATTCAAAAATCAACCTAGA  
AGATCCTTGAGATTCTTGATGAAATCTGTGGGATATCACTTTCCAAACTGTCAGATTTCC  
TATGAGGATTATGTATCTTCTTGACCATGATGGGTTCCCATTTAAAATGTCACACTCTCA  
TTCCATCACATTACATTACATTATTATTCATCTCTATTCTTCTTCTTCTGTTCTATTCTTT  
CATCCAATTCTCTCCTTCTGTTGTGGCTAGCTAGCACACAATTATATCTTCCAAGTTATT  
>Glyma18g17330 | Gm18:18479551-18481050 REVERSE  
AGCATTGTTGTTTGTATTTTATTTTACCTGACTCAAACATTTACTTTATGTAAAATTTAA  
TGTATTGTTTTTTTAAAAAAATACACAGCTTCTTTAGATCACACCTTTTAAAGAAATTT  
TCAAAAGAAGAAAAAACTTTTCATGAATTATCATATCCGCAATGGTTCTTAAAAAGAAGA  
AAAGAAAGAAAGAAAATCAAAGAAGCAATAGTGTCCGCGGAAAAGGCATTGTTATGATG  
CTTCCAGTCGAGGGAGTTGCATGGACCGGCACGGGATTTGACGGCGCGGTTTCGCAAAG  
CATTCACTTTAGGTCAACCGGGCCAGCCAATCACTGTGTGACATGTCATCTTTCGCACAT  
CCCAAGAATTGACCAAAATCTCGTCAATCACACGCGATATATCATTCTCATCACAATAA  
TAATATTAAGAAAGTTTGTGATACGGAGAGATCATAGTTCGAAGTGGATTTCAGAATCT  
CAGTCCATGTCTAAACATTAATAAATAACAAGAAAAAGGGACAGTGAAGATTTTGTGA  
TTTCTGAGAGATTTGCTTTTGCAGAAAGGACTTTATCATAGAGAGATATTAGCTGAT  
ATATGGTATAGAAAATCTTCCATTTTATATATAAAAAAGAAAATCTTCCATTATAAT  
TTAATTATTTTTTAAAAAATAAAAATTTAGGAAATAAGAATTTATAAGAAAATTTATAA  
ATTGTTAATTATTTTTAATTTCAATTAAGAATAACATAAAAAATAAATATATTAATTA  
TTACAAGATAATTTTATTTTAAAGATTTAATTTTCATGCGCTATGTTTTACCATAAAT  
CAATTAGAAAATAATCTTAGATATAACATTTGAAGTAATAATTATAAAAGTTAACAATTT  
TATCATAAATAACAATTTATATTAGATTATTGTTTAAAACATTTTATACCATCAGTGGA  
TTTCAAATTTAAGTTTTATACTAATAATGAGAAAGATAAGATTTTATTCTTAATATTCAC  
AAATTTATATGAAAAAAGATCAGTCACTAATATGATAAAAAGTTTTAGATCTTATTTCA  
TCTCAATTTATTTTTACAATAATTATTTTAAAGTAACATTGTAATTTGTGATTATACAAG  
AATGTAATTTGTTATTAGTACATAGAACTCAATTAATATTATAAGAATCTCTTATATTT  
AGAAAATACTTTTACAAATTTATTTTTTAAAAAATTAAACTGTCCTTTTCCAAAACTGA  
AAAATTAAGTTATGGTAAAAAATAATAAATAATTTTGTTTAACATCTTTATAAAAGT  
ATATTTATGATTTATAATTAACATTACAATTTAGATAGCNNNNNNNNNNNNNNNNNNNN  
NNNNNNNNNNNNNNNNNNNNNNNNNNNNNNNNNNNNNNNNNNNNNNNNNNNNNNNNNN  
NNNNNNNNNNNNNNNNNNNNNNNNNNNNNNNNNNNNNNNNNNNNNNNNNNNNNNNNNN  
NNNNNNNNNNNNNNNNNNNNNNNNNNNNNNNNNNNNNNNNNNNNNNNNNNNNNNNNNN  
>Glyma11g37480 | Gm11:38572962-38574461 REVERSE  
TCAGTGAATTCTTAGCTGACAAAACAAAAGAGGGTGAATTTTTTTTATATATATATTTCTT  
GTCCCCTTACTTTTTCTTCATAAATTTCTTCTCATGCATTTTTCCAAAACAGAATCTGG  
TTTTATTCTCTGTTTTCTTCCCACCCTATGCAATTGCAAACCATAAATTTCCCACTAA  
TAAATGAACCGCAACCTCTCCTGCCTCATCATCGTCATAATAATATTAATACATATT  
TTTATAACAAATTGCTATAATTCATTTTTATCACATTGTTTAAAAATGGAGATCAAAAC  
TAATATTTATTCAGCAAAAAAAATCAAACACTAGTATTTTCATAAGTATTGTTCTCTTAAC  
CTATAAAGACATTTTTTAAAGATAAAATTATAAAACATATACGAGCTAAAGTATATAACA  
CTTTAGATAGATGATTTAAATTAGGAGACTCATGCAAGTTAAATAAACAATATCTCAT  
ATACAATAATCCTAAATAATTGAGCGGAATTGAGGTGCAAACATTAATAATAGAAAGAAC  
AGGTA AACACAAGGCTTTTTAGTCCTTTAGCCTCAATTGAAAATTAATCTGATAC  
ACCAAATAGCACTCTACATAGATAACAGTCCCACTAAAACCCTTTTTAAAAACAAAACG  
ATAACACCATAACAAGCCAAAGCATATAAAATATATACTTCAAATAAGCAAAGTGCCACT  
TACTGGCTTTTAGAAATGCATCTGCACCGCAGCACTACACAACGCAGGTTCCAGAAGTAT  
AGTAGAAAGTAGAAGCACTGTTTGTTCCTAGGTTATCTCAGTATAATAGTACATAAT  
AATAGCTTTTGCATATTTTGAAGAAGCCTCACTCACTTTCCCTGGGATGCCTGAACAA  
TCTTCCCACTCAGTTCAGTTCACTTTTATTAATGTTTTTGGTGAATGGTATTCCTAC  
AAGTTTTGATTATATTTAAATTGATTATCAGATTAATATTTAATCTCAACATAATCACAT  
TTAAAAGTTTATTATTCTCTAAAAGTGTATTCTGCATATATCAAATTCAGTCATCA  
TAAATTAATATAGGTTGTCAATCGAGTTAGGTTATATATTTTCAATTTAAATTAAGCC  
GCCAACGTGTTTCGGCATTAAACTTAAAAAAACTGCATCACTGTTCTAGTTCCTATA  
ATACTAATGTAATGCAATTCTATAACAAGTAGTATAGAAGTGAATTGTTGTAGCTAGGTA  
GGACCAACAAAACCAAAGGATATATACTAACGTACGCCACAGGGACCGTTAGCTGTGC  
GGCGCAATATTCGTTGGTGTGGTGTCTCTCTCTCTCTCTCTCTCTCTCTCTCTCTCTCT  
TATTTTTTAACTCCTTAACTTATTATAACCCCAACAAACTCAACCTTTTTTTGAAC

TCACTAACACAAGCACACTGATCCTAGCTTGGCCCTCTATTCTGTGTCTCTCTCGCAAAA  
>Glyma05g06070 | Gm05:5629283-5630782 FORWARD  
ATGTTTATTATTTAGTTAGCTTTTACATATTTAAATACCTTAATTTTGAATGACTTAAAC  
TGATTAGATATTTAATTTTTAATTGTAATAGTATGATTGTGATTATATGCTACAGGTACA  
TGTTAGATTCTAAATACAGGTTACGAGGTTAGTATGATTAATATAGAGTATTGATCTCAT  
TTTTTAAAGTGAGATTTTCATTTTTCTTTTTAGTTTTAGCTATATGGTTATGAAATGC  
AAATTTTATTTAATCTTTCGTCCTGTATTCATTTGGATATTATTTGTTTTCTAATTTTT  
ACTTTATTTTTTTTTATCATTTCATTTTTCATAATATGTTAATATTTAATCAATCAAT  
TCCACTACCCAAATCATTCCACTCTACCCAACAATTTGTTATATTGAATTGGATCTTAA  
ATAAATCAAATTCATCTAACATAGATCTCTTATATTATTAAAATCATTCTCATTAA  
AAGTGGATTAATAATAATTTAATTCTCTTATTTTATTTAATTAATATTTTTGTTTCATC  
TTATTTGATATTTGATTTTCCTCTTTTACAAATAAAAAAATCGGTCCATTAGTCAATTT  
TAGGACGTTGAATGTTAATAAGAAAAATATTATCCGTTAAATTGCTAACATAACTATA  
ATATTAATAATTTAAATTATTAATTTAATAAGAATTTAATTAATAATAATATCATGTG  
CCACATCATCAATTGAGATCAACATTCTAAAAATTTGATGGTTGAATCAAATGTTTTATT  
TTGTTTTATTGGAGAACCAAAATTGAGAATGCAATAAAATAAGAGATCAAATTTATTTT  
TAATTTTAAAACTCAAAGCTTCTTATTTAATAATAATTATTCCAATTTATATGTAAACA  
CAATTATTTAATAAAATTAATAAATATTTCTTTTTTAAAAAATAACCTAAATAAACGC  
TTAATAACTTAACTCTTTGTGCTGCCTAGGTCCACCTGAATTGATGAAATATTTACATTA  
CCTTAGTCGAAGATTATTTTCATCGGATAATTAATGCACGATGATTGGGCACCCAACAA  
CTTTAAAAGCATTAAATAAACCATTTTTTTTTAGAGAAATAAATGCATAATAATTATTATGA  
TAAAAGAAGCTCCATTAATGGCACTGATGAGGAAAAGACACGTTATACAGTTAAACCTC  
TCTAAATCTCTAATACCAATGTCAATAAGATACTATTCCCTCTTAACTTTTTTACTATA  
ATGAGTAGTTGTTGAGCGTGTTCCTGCAACCATTTTCTCCTTCTCGGTTGATTGAT  
TGGTGATGTTGCTGGTGCCCCAGAAGAAGGGGTAGTGTGGAATATTATTAAGCTTTGA  
ACTTTGAAGTTGTGGCAGAAATCATTGACCCTTTTTGAGAGACTTACTTACTTGTGGTCC  
AAAAGTCTGATGGCAACTGTTCAAGTGGTACAGGAAGCACCTCCAAGCCAGCATTTA  
>Glyma19g35480 | Gm19:43067227-43068726 FORWARD

GTGAGTCTGTGTTGCTTCGTCACCACATGAGTTGCGAACTAAGATTAACAGTGCGATAAA  
ATTAATTGAATGTGACACAAGTTATAATAAAGCACAAATTATTAACGACAGTGAGCCA  
GCGCAATCTTTTTTAGCTGTCACCAAAATCCGTTTTCTTTATACAAACATGTCCTAA  
GTCACATAACATTTTTCCATCTGGGTAAACAAAATTAATAATAAACTGTATTTTTAATAG  
GAAAACGGTTTGAAGGAGTGGCTTTGTTTTGTTTTGTTTTTTTTTTTTGCATTATTGT  
ACGGTATATATAGATAGACTTGATTGATGGCCTAGGAAGAAAAGTAAAGTTCATAAAGG  
TATAGGCTTAGTTGTGCTTTGTACTAATGAAAAGGAGAGGAATTGAAAGGAATGACGACC  
CCCCCTCTCCTTGTCAATAAAAAATGATTTGAAATACTTGTCTTGGTCAAATAGGAAAT  
ATGCTCCAGAAGTTAATTAATAAAGATGGGAATCAACCCATTTTAGGTAAGAATAACA  
GTACTAGAGATATTGAACAAAATCCTACAAGATACTTTTCTGAATCCAATACTGATGCTT  
ATACCACATGTTCTTTCTTTCTCATTATGCTTTAGATCAATGACTTCTGGAACCCG  
TGGAGGGAGTATATAGCTCAACTGCTTGTCACTTATCCATCTATCCTGCTGCTGGTGAC  
TGTTGGAAAAGAGTTATCCATTCAGGTTAGTCTCAAATTAACATTAGTTGTTATAAGT  
GGGTCTACCAGATTTTAGACCATACTACATACTTTACTGATTCACACCTGAATTATTTT  
ATATGATTTATATTTTTCAAATTGAGTAATGATACATATTTGTTACAATAAAGCATCT  
CATTACATTTTTTTTTCTATTTCTTTTTTTTACGTCATATTATATGAGCACTAGTCATG  
AGGTGTCTATATAGATAATTTTTTTTTAAAAAATTTATATTGTTGTGTTGAATACAATT  
TTGAAATGCACGTATAACTCCTCTCTATGTTTCTCAGAATCAGTAAATTGATGCTTCT  
GCGTAAACAACCTAATAAATTGATGCTTCTACGTAATCTACGTGCTTCAAACATCAACG  
ATTATGAATCAAATACTGTAATTCAAGATTGCTTTAGTATTGAGTAATGATAATTTATAC  
ATTTCAATTATCTTACAACCTTATCTTCCACCCTATTTTTTTTTCTTATTTCTCTACCTTTT  
CGTTATATTACATATTATATCTATCATTTTCTCTATACTTTTGTTTTTATCTCTATCTCA  
TCCTCCCTATGCTCCAATCCACCCAAAATAGGGTGGAGGTTTAAACATTTCCGTTTAGTAC  
TTCATATATATTTTATGAAACATTATCTTTGGATACACATATATCTAATATATTCCCAA  
AGAAACTGTGCTACAGGGAGAAGACAAAAGGAAAAGATTGGTGAAGAACAATTAAGT  
C

>Glyma04g33110 | Gm04:38595069-38596568 REVERSE  
AGGCCTCGACGCATGAAGTTCTTGCACAAATCGCATGACACATCTCCGACCAACATCACA

CTGAACTTCTCTCCCTCCGCCTCAAGACGTCTTCGATGGACCTTTTTATTTTTTTTCACG  
GGTGAATAGTGCCTATCATCATCAGATAAGATCGTCACATTATCCATGTGTGCAAGCAAC  
TCAAACACCCGCTCACATGACCCTATGCAGGGCCCTAGCATGTGAAGTTCACACACATG  
ACCTCCAATGAACCGCCTTTAGTTTTCCATTGGGTTGACCAGATTTGTAACAAGCTCGATT  
CATATGACATATATGCTGAAGCTTGAAGGGAGTGTTAAGATTACACATTATTCTATTAT  
TTATGATTAGATAGTAATTAGTGATTAGTCCATTACTCATTATTAGATGGATTTTAT  
GTAATCAATATTGATCTTATTTGCTCATTATAAATAAAGGGTTAGCGTGATCATCTTTGA  
CACAATAACATTGCTATAACAAGTTAGGGACGGAATATACATTCTCATGTTTGTACAA  
GTTTTTGA AAAATATTCCCATGTATTATTGATTCTAAGAATGCTATGATTTTATTTTT  
ATCATGTTTTCTTACATTTATATTCCCATCAGGAGGGAGTGGGAAAGTAATATTCCACA  
AAAATATGAAAATTTATTATCTAATACACGTGTAATTTTCTTTTCTATTTAACTTATTT  
AAATTTTAAAACTATTCCACCTTTCTCGTGATAAAGTTTTCTGAGAAAATTTATTTAA  
AAAAACATTTTCAAGAAAACTGTTTATCGAGAATCTTATTTTCTTAAAACAGATATAAA  
ACATTTGAAATTAAGATTCTTAAAAACCTTGAAATTTATCTCCTACCAATGCCTCCTAAA  
AGTGATAACCGAGAAAATTTCTGCGAGAATAATCGATCAAATTTAAATTAATTAAGACT  
AAAAACAAAAATAAAAAAATAGGAAAAAAAACCTAAACCCAAATTTATTAATAGATATTA  
TTCATGAAAAGTGATGGGATATTTTAGACTATACATTACATTGGTTCCTCTTCATTTTGG  
TGAATGAGAAAGATCTTCAGGTGACGTGGCCGGCTCCCTATCTCTACCCAATATCCAG  
ACCACCCACTCCCTCTCTCTTTTCTATTGCACTTTTTCGACCCTTTCTTTCCACGTCTC  
CCTCTTTCTACGCCACGCCCGTGTGCACTGCGCCCCCAATCCCCGCGCACGTTAGCT  
CACCCCTTCTTTCTTAATTCCAATTTAGGCACCGCTTTTTCGACGCCCCCAACCAAAC  
AAAACAAAAAATAGCCGCGTTTCTTACCATGCTTCGCTTCGCCGACCTCTGACTCA  
ATAATAACAATCAGCCACCATCTCCTTTTCCCTTTAGTATCTGCTAACGTGCGCCGTCTC  
AACGGTGTGTTTATCTCCCTCAACGATGCTGTTTTATCGGAATGAGCAAGTCGAGGAAT  
>Glyma06g14150 | Gm06:11154430-11155929 FORWARD

TTTAAAAGAGATTTCTTCTATTCATGCATTGGGAAAAAAGTATTTATCTTAGAATGCATT  
TGATTCACGAATTAATTTTTTTTTATCGAAAATGTAACATTAGAATATGAATTTTTTAT  
GCTTGTATAAGTTTTGAAAATTTCTCAAGTATAATGAAACTCATTTTATGATGTT  
CGTGAAAAGTCATTATTTAAGAATGATATACTTTTTTTTTCAAACCTGTTATTCTTACC  
AAAAGGGATAAAAATGGGATGTTACGTGAGAATATGAAAATTTCTATAAATACACA  
TGCAACTTTTATTTATTTTTATTTGAATTTTTAAATTTTAAAAATAATTCTAAGAATA  
TTAAAACGTAATTAACATGTTTTTAAATATACTAAAAATTAATATATTTAATTTTCATA  
TTCTAAGAATGTAATATTATCCGTGAAAAACGTTTCTCAATATTTGTTCTTTTATT  
TGTATGCGGTGATTTGAACTAACTACTAGTACCATTTTTTTTTATAAGCAAAGTGTATA  
TATTTATTTGAACCAACTCAAAGCACAAGTTGTGCCTTGAGCCAACACGAGCATATTACA  
CAATAGGTACTGATACCAATTAAGTTATCTATAAAAATAAGCTATATATGCTTTTTCATTA  
AATAAAATTTGTAAGAATCAATAATATAAAAATTAATAAACAAGAAATAGAGGTC  
TTTGGTAGTCAAGAAATGGAGTTAGAATAAAAAAAAATCGAAGACTAAAAAGGAGAA  
GAAAAGAAATGCAGAAAGACAAATCACCGAAAACAAATACAGTAGGCTTCTAGAGATG  
GAATAAGTGTCAAACATTTAAAAGTAGGGTAGTTTGGGAATTTAGAGAGAGAAAAATGA  
AATGGTTAATAATTGGATAAGAAGAAGACTCTGTAATGAGAGGCAATAAGATTTAGAAAA  
GTGTCCTTGGGTTGATTTGAACGTCATCCATATCTAAGCTTAGGGACTAGGGTGGTAAA  
TGAACATGCAGGCCACTTACGCATTGAATCGTGGACTTTCTCCAACGGAGGAGCGAGT  
ATCCAGCACGAAAGACAGTGGGCGCGTGAGGAGCTCCCTCCTCGTAGATAGCGTTTGAC  
AACTTCAAAGCCACAAAACGAGACTCTCCCTAGGACAGAGCCACGTGTCTCGGTGTCGT  
CCATGTGATACATGGGCAGCCTCAAAGCACTCAAAAATATCTTTGAGAGAGTGGGTTTAA  
ATTAATATCTTTCTGCCGGCGGGGCCACTCAGCGGCAATTGTCCCACACATAAAATAT  
CCACATGAAATGAAATTCGGATATTTTTTGGAAAGAAGCGAAGTTAATAAGAACCAAAGA  
AATAAATAAATAAAAAAGCGGGTGA AAAAATATCCACCACCAAACCCACCCACGAGAACC  
CAATGGCTTTTTGGCTTTAGATCTTTGGTTCGAAAACCAGATCTCATTGCTGACGTGGATC  
>Glyma17g33230 | Gm17:36888810-36890309 FORWARD

TAGTAAAATTGATTCATTTAATATCATTAAATAAATATTATAAAAATAAACTAATACAAT  
TAAAACAAAATATTCTTCCATGAGATTTATTATAATAGTTTGAATCACAATTATTTCTTA  
TAACTAATTTCTTACAATAATTTTTGTTACAACCATATTTGTTAGAATCAGATTTGCTA  
AACAAATGAACAAAATATGATCTATTAGTATTAATATTATACCACATGACAAAAAAAATA  
TATGAAAGAAAGGTA AAAACAATAAATGTACCTAAAAGTAATATATTAAGAAGTTTTA

AGATTAGTGGTCTCATCACTTACACTTCCAATGCTTGGAGTCCCAATATTAGTAATATTT  
AAAGCCAAATCGAGACAACCTTTAAAAATTTTATGATCGGTTTTAATTGGTTCGATTTTATGATC  
GAATTTATAAATCTAAATCTGCGACCCAACCCGTACATGAACGGTTTTGATCGATTCTAC  
TCGATTTTACCCAAATACATAAATAACCTAACCCCAATTGTTCCGATCGATTTGGATCA  
ATTCGGGTTTCGCGGTAACCTACACCCGTGAACAGTCCTAATTCTAAGGAAAAAAAAAAG  
ATCAAATTTAAATGGATAATCTCTTGACCTGAACCAAACAACCTTTTGTGAATGAGTT  
AAGATGGGTTGGGTTTCAAAAAAATTGTGAAAATTAACCAACTAAATCATTCAAATT  
TGATTAGGATAAGTCTTAGAATTTGGCTAAAACAGGCCCGAATCGACTTACAAACGTTCC  
AATGCTTAACAAAAATTGTAATAAACTACGGTAATATTCCGGGTGATTTCTTAAAAAA  
ATTAATGTTTTTAAAAGTAAAGGATTCAATGTGTTTTTGAATAATAAGGGATATATGGT  
GTAATATGTTTCTTGACAACAAGATAATGCTATGATGTATCTCAAATAATTAGGGAAAG  
TTGGGTTTAGGTAATAAAAGGACAGATATGATGAGAAATTAGGAAAAAGATAAAGATACT  
CTGTAATTTGGTGTCTAAATTCTAAAAAGGAAAGAATCATCATATGTTCCGTTTTTATG  
AGCGCGTGCACACAACGCGTCAAATTTCCAGAAAATTTGAATTGAATTGCCGATTT  
CTCGTTCTACGAGAAAGGAAGGTCCATCATCAGAACTTCCATAATTATAATTCGGTCA  
AAATCTCCTCTGTTTTAAATCAAACCTTTCAGTACTCACACCACCGCACATTTTATG  
TCAAGATTCTGTATCTTTCTCATTCAACTTTGTCACACAACACATAAACTCAAATAAA  
AAACAATTGTTTTTTAATTGTTCTCTTTCTTTCCCTTCATCACTCTACTTTTTCC  
CCTTGTCAACGATATTCTTCTTAAAAATCTTCTTTCTTTTCTTTTCTTTTCTTTTCTTTCG  
GGTCTGTGTTTCATAGATTCTGTTCTGGGGTATTGGCTTCAAGACCCCTTTGCAAGAAA  
>Glyma16g02050 | Gm16:1590480-1591979 REVERSE  
CTCAAACATACAACCTTATCAACGCCATTTATACATCCAAAGATAATTTATTATCCAAAAT  
AAAACTTCATACATTTGATTCTTTGAGTAATTTATTCATAATTTCTATGTCCTCTTG  
CTAATTCTCAACAAGCTACTTTGACTATCATCTTTGTTTACATCAACTATGTATGT  
CACGATTTATAATAAAATAATGGGTTAACTAACTTTTTAATCCCTAAATTTTTTAAAA  
TTTAGTTTTAGACCCTAACTTGTGAGCCTGTACGCGAGATAAAAAATATGGTAAAATAA  
AACCCAGATGTTACTGTGCAGAGAGAAAACGTGAGTCAACACGTGTCCGTCTGGTGGAG  
CCCATGCTTGTGTAATAAGATAAGGGATGGCTGAAATGGTGCCACGTGAGCCTGGTAGTT  
GCGATCCACCTTTGATGAGAGATTGAGGTTTTGGTGGGAAGATATTTCTAACTATTTTC  
ACGGCTGTGGTTGTGGGCGAAAGCTGCTTGCCAGAACTGAGCAAAGAAGCAAGTAAAG  
GGCGGTTTGGAAATTGTTACTATTATTTCTCTCTTACATGTGTTGAGGATGATGATGAAG  
TCAATTTCACTCTGTTTTCTTCTTCTTCTTCTTGTGGCCGATTAGGGTTATTATT  
CTTTCTGGCTGTGGAACGAACCATGCTGTTGTTTCGAGAATGGATGAGTTGAACTGCGCGA  
TGACGACGACGACGACGAGAAATAGCAATGCGGAGCTGGTTCAATGGGAGAGGTTGAGG  
TTTTGGTGGGAAGATATTTCTAACTATTTTACGGCTGTGGTTGTGGGCGAAAGCTGCTTG  
CCAGAACTGAGCAAAGAAGCAAGTAAAGGGCGGTTTTGGAAATTGTTACTATTATTTCT  
CTCTTACATGTGTTGAGGATGATGATGAAGTCAATTTCACTCACTCTGTTTTCTTCTTCT  
TCTTCTTGTGGCCGATTAGGGTTATTATTCTTCTGGCTGTGGAACGAACCATGCTGTT  
GTTGAGAATGGATGAGTTGAACTGCGCATGACGACGACGACGACGAGAAATAGCAAT  
GCGGAGCTGGTTCAATGGGAGAGGTTGAGGTTTTGGTGGGAAGATATTTCTAACTATTTTC  
ACGGCTGTGGTTGTGGGCGAAAGCTGCTTGCCAGAACTGAGCAAAGAAGCAAGTAAAG  
GGCGGTTTGGAAATTGTTACTATTATTTCTCTTACATGTGTTGAGGATGATGATGAAG  
TCAATTTCACTCTGTTTTCTTCTTCTTCTTCTTGTGGCCGATTAGGGTTATTATT  
CTTTCTGGCTGTGGAACGAACCATGCTGTTGTTTCGAGAATGGATGAGTTGAACTGCGCGA  
TGACGACGACGACGAGAAATAGCAATGCGGAGCTGGTTCAATGGGAGAGGTTGAGGTTTT  
GGTGGGAAGATATTTCTAACTATTTTACGGCTGTGGTTGTGGGCGAAAGCTGCTTGCCA  
GAAATAGAAGTATCTTTTAGGTCATTTCTTAATAATGATACAAAACATTCACCAACTTTATT  
AATAATTAATATAGGTCACAAATTAATAAGAGAAATTTAAAAGAATTAACAGATTTTAAAG  
TGCATTGATTAACGTTAAAAACACACACTATACACGTTATTTAATACTACTAATAAAAA  
CGGAAGGGGTTCCGAGTTTT
