# Supplementary material for: Genome-Wide Analysis of Two-Component Systems and Prediction of Stress-Responsive Two-Component System Members in Soybean
Source: PubMed Central journal article supplement — DNA Res. 2010 Sep 3;17(5):303–24. doi: 10.1093/dnares/dsq021 (PMC2955714; doi:10.1093/dnares/dsq021), 2010-09-03
Supplement: supp_dsq021_dsq021supp_fig2.pdf [file supp_dsq021_dsq021supp_fig2.pdf]

|              |   |                                                                                                                       |     |     |
|--------------|---|-----------------------------------------------------------------------------------------------------------------------|-----|-----|
| ARR3         | : | -----MAKGGVSLRRSEMIGIG-IGELES-----                                                                                    | :   | 26  |
| ARR4         | : | -----MARDGGVSLRRSEMMSVGGIGGIESA-----                                                                                  | :   | 27  |
| ARR5         | : | -----MAEVLRPMLDI-----SNDTSS-----                                                                                      | :   | 18  |
| ARR6         | : | -----MAEVMVLRKMEI-----LNHSSK-----                                                                                     | :   | 18  |
| ARR7         | : | -----MAVGEVVRMEIPAG-----GDLT-----                                                                                     | :   | 19  |
| ARR8         | : | -----MVMET-----                                                                                                       | :   | 5   |
| ARR9         | : | -----MGMAA-----                                                                                                       | :   | 5   |
| ARR15        | : | -----MALRDLSSSLSS-----                                                                                                | :   | 13  |
| ARR16        | : | -----MNSSGGSCSSL-----MDVVAYDHLHLHG-----                                                                               | :   | 24  |
| ARR17        | : | -----MNGKCGSGS-----DSCLSS-----                                                                                        | :   | 15  |
| OsRR1        | : | -----                                                                                                                 | :   | -   |
| OsRR2        | : | -----                                                                                                                 | :   | -   |
| OsRR3        | : | -----MSTKTVPE-----                                                                                                    | :   | 8   |
| OsRR4        | : | -----MTVVDA-----                                                                                                      | :   | 6   |
| OsRR5        | : | -----MATCRS-----RGVERGG-----                                                                                          | :   | 13  |
| OsRR6        | : | -----MAAAAQAPAAKVVVATSPRAGGGGGGDRKVVVVVAAAAG-----                                                                     | :   | 43  |
| OsRR7        | : | -----MRVPAAVTGGCGVDDGGGCCRGGGKLADWEEGKDEMKSUVVKGWTRM-----                                                             | :   | 50  |
| OsRR8        | : | -----                                                                                                                 | :   | -   |
| OsRR9        | : | -----MAVAI-----                                                                                                       | :   | 5   |
| OsRR10       | : | -----MAVAI-----                                                                                                       | :   | 5   |
| OsRR11       | : | -----MSSIGAGAGAVGA-AVAAVVGGG-----                                                                                     | :   | 25  |
| OsRR12       | : | -----                                                                                                                 | :   | -   |
| OsRR13       | : | -----                                                                                                                 | :   | -   |
| ARR1         | : | -----                                                                                                                 | MM  | 2   |
| ARR2         | : | -----                                                                                                                 | MV  | 2   |
| ARR10        | : | -----                                                                                                                 | :   | -   |
| ARR11        | : | -----                                                                                                                 | :   | -   |
| ARR12        | : | -----                                                                                                                 | :   | -   |
| ARR13        | : | -----                                                                                                                 | :   | -   |
| ARR14        | : | -----                                                                                                                 | :   | -   |
| ARR18        | : | -----                                                                                                                 | :   | -   |
| ARR19        | : | -----                                                                                                                 | :   | -   |
| ARR20        | : | -----                                                                                                                 | :   | -   |
| ARR21        | : | -----                                                                                                                 | :   | -   |
| OsRR21       | : | -----                                                                                                                 | :   | -   |
| OsRR22       | : | -----                                                                                                                 | :   | -   |
| OsRR23       | : | -----                                                                                                                 | :   | -   |
| OsRR24       | : | -----                                                                                                                 | :   | -   |
| OsRR25       | : | -----                                                                                                                 | :   | -   |
| OsRR26       | : | -----                                                                                                                 | :   | -   |
| OsRR27       | : | -----                                                                                                                 | :   | -   |
| OsRR28       | : | -----                                                                                                                 | :   | -   |
| OsRR29       | : | -----                                                                                                                 | :   | -   |
| OsRR30       | : | -----                                                                                                                 | :   | -   |
| OsRR31       | : | -----                                                                                                                 | :   | -   |
| OsRR32       | : | -----                                                                                                                 | :   | -   |
| OsRR33       | : | -----                                                                                                                 | :   | -   |
| ARR22        | : | -----                                                                                                                 | :   | -   |
| ARR24        | : | -----                                                                                                                 | :   | -   |
| OsRR41       | : | -----                                                                                                                 | :   | -   |
| OsRR42       | : | -----                                                                                                                 | :   | -   |
| ARR23        | : | -----                                                                                                                 | :   | -   |
| APRR1 / TOC1 | : | -----                                                                                                                 | :   | -   |
| APRR3        | : | -----MCFNNIETGDEVETERQVFGSSEDEFVREDTAR-----                                                                           | :   | 34  |
| APRR5        | : | MWQTWPRQPILLDIFSNPNTLSTTVRSWSVRHPLSIIITVKTFARFFLDIFFSPHYRKNKVLFFALFSFISPLTNILICFVTVLSLELSSSSSIIDLGFSLKLSVCVIMTSSEEVVE | :   | 118 |
| APRR7        | : | -----MNANEEGESRYPITDRKTGETKFDRESRTEKHSEEKTN-----                                                                      | :   | 41  |
| APRR9        | : | -----MGEIVLSS-----                                                                                                    | :   | 9   |
| APRR2        | : | -----                                                                                                                 | :   | -   |
| APRR4        | : | -----                                                                                                                 | M   | 1   |
| APRR6        | : | -----                                                                                                                 | :   | -   |
| APRR8        | : | -----                                                                                                                 | :   | -   |
| OsPRR1       | : | -----                                                                                                                 | :   | -   |
| OsPRR37      | : | -----MMGTAHHNQTAG-----SALGVG-----VGDANDAVP-----                                                                       | :   | 27  |
| OsPRR73      | : | -----MGSACEAGTDEPSRDDVKGTGNGILENGHSHKPEEEEWNRN-----                                                                   | :   | 40  |
| OsPRR59      | : | -----                                                                                                                 | MSP | 3   |
| OsPRR95      | : | -----                                                                                                                 | MG  | 2   |
| OsPRR10      | : | -----                                                                                                                 | :   | -   |
| OsPRR11      | : | -----                                                                                                                 | :   | -   |
| OsPRR12      | : | -----                                                                                                                 | :   | -   |
| GmRR1        | : | -----MDTDSFVSFDHVSP-----                                                                                              | :   | 14  |
| GmRR2        | : | -----MAITGDIQRQSITEM-----LAESP-----                                                                                   | :   | 20  |
| GmRR3        | : | -----MAITGEIFRQSIKEM-----LEESP-----                                                                                   | :   | 20  |
| GmRR4        | : | -----MDSNSVVSWPRLPEN-----IDGFGIK-----                                                                                 | :   | 22  |
| GmRR5        | : | -----MDSNSVVSWPRLPEN-----INGFGLK-----                                                                                 | :   | 22  |
| GmRR6        | : | -----MAMTV-----                                                                                                       | :   | 5   |
| GmRR7        | : | -----MEFVDTRKQLQHQ-----                                                                                               | :   | 15  |
| GmRR8        | : | -----MEFLDTRKQLQ-Q-----                                                                                               | :   | 14  |
| GmRR9        | : | -----MGMAA-----                                                                                                       | :   | 6   |
| GmRR10       | : | -----MGMAA-----                                                                                                       | :   | 5   |
| GmRR11       | : | -----MGMAA-----                                                                                                       | :   | 5   |
| GmRR12       | : | -----MGMAA-----                                                                                                       | :   | 5   |
| GmRR13       | : | -----MELVNSQKQKQ-----                                                                                                 | :   | 12  |
| GmRR14       | : | -----MASAGDLFTHGLPEV-----G-----                                                                                       | :   | 16  |
| GmRR15       | : | -----MASAGDVFRQGLPEV-----C-----                                                                                       | :   | 16  |
| GmRR16       | : | -----MAAGSSS-----NWVMES-----                                                                                          | :   | 13  |
| GmRR17       | : | -----MAASSSS-----NWVMES-----                                                                                          | :   | 13  |
| GmRR18       | : | -----MAMTV-----                                                                                                       | :   | 5   |
| GmRR19       | : | -----                                                                                                                 | M   | 1   |
| GmRR20       | : | -----                                                                                                                 | M   | 1   |
| GmRR21       | : | -----                                                                                                                 | M   | 1   |
| GmRR22       | : | -----                                                                                                                 | M   | 1   |
| GmRR23       | : | -----                                                                                                                 | :   | -   |
| GmRR24       | : | -----                                                                                                                 | :   | -   |
| GmRR25       | : | -----                                                                                                                 | :   | -   |
| GmRR26       | : | -----                                                                                                                 | :   | -   |
| GmRR27       | : | -----                                                                                                                 | :   | -   |
| GmRR28       | : | -----                                                                                                                 | :   | -   |
| GmRR29       | : | -----                                                                                                                 | :   | -   |
| GmRR30       | : | -----                                                                                                                 | :   | -   |
| GmRR31       | : | -----                                                                                                                 | :   | -   |
| GmRR32       | : | -----                                                                                                                 | :   | -   |
| GmRR33       | : | -----                                                                                                                 | :   | -   |
| GmRR34       | : | -----                                                                                                                 | :   | -   |
| GmRR35       | : | -----                                                                                                                 | :   | -   |
| GmRR36       | : | -----                                                                                                                 | :   | -   |
| GmPRR37      | : | -----                                                                                                                 | :   | -   |
| GmPRR38      | : | -----                                                                                                                 | :   | -   |
| GmPRR39      | : | -----MWATSSKCLDIFPNQDIFGS-----RWIRGRLTLVSHPTPFDPKLVNGSGFGLVPPQILNSDAIVPF-----                                         | :   | 64  |
| GmPRR40      | : | -----MGRVSRGRTGHVWTEWNESEDEIHIHILPSEDILDFRGSAAAAA-----                                                                | :   | 46  |
| GmPRR41      | : | -----                                                                                                                 | :   | -   |
| GmPRR42      | : | -----                                                                                                                 | :   | -   |
| GmPRR43      | : | -----MGEVVIMSG-----EKKSVRVEG-----                                                                                     | :   | 18  |
| GmPRR44      | : | -----                                                                                                                 | :   | -   |
| GmPRR45      | : | -----                                                                                                                 | :   | -   |
| GmPRR46      | : | -----                                                                                                                 | :   | -   |
| GmPRR47      | : | -----                                                                                                                 | :   | -   |
| GmPRR48      | : | -----                                                                                                                 | :   | -   |
| GmPRR49      | : | -----                                                                                                                 | :   | -   |

|              |   |      |                                                 |      |                                   |      |                                    |      |       |
|--------------|---|------|-------------------------------------------------|------|-----------------------------------|------|------------------------------------|------|-------|
| ARR3         | : | ---- | PLDSDQVHVLAVD                                   | ---- | DSLVDRIVERLERITSCK                | ---- | VTAVDSGWRALFELG-LDDDKAAVEFDR       | ---- | : 85  |
| ARR4         | : | ---- | PLDLDEVHVLAVD                                   | ---- | DSLVDRIVERLERITSCK                | ---- | VTAVDSGWRALFELG-LDNEKASAEFDR       | ---- | : 86  |
| ARR5         | : | ---- | LASPKLLHVLAVD                                   | ---- | DSMVDKFERLERVSSCK                 | ---- | VTVVDSATRALQYLG-LDGENNSS--VGFE--   | ---- | : 77  |
| ARR6         | : | ---- | FGSPDPLHVLAVD                                   | ---- | DSHVDRKFERLERVSSCK                | ---- | VTVVDSATRALQYLG-LDVEEKS--VGFE--    | ---- | : 76  |
| ARR7         | : | ---- | TTPELHVLAVD                                     | ---- | DSIVDRKVERLERISSCK                | ---- | VTTVESGTRALQYLG-LDGGKGA--SNLK--    | ---- | : 75  |
| ARR8         | : | ---- | ESKFHVLAVD                                      | ---- | DSLFDKMERLERKQSSCQ                | ---- | VTTVDSGSKALEFGLR--VDDNDPNALSTSP    | ---- | : 64  |
| ARR9         | : | ---- | ESQFHVLAVD                                      | ---- | DSLFDKMERLERKQSSCQ                | ---- | VTTVDSGSKALEFGLRQSTSDNDPNAFSKAP    | ---- | : 66  |
| ARR15        | : | ---- | SSPELHVLAVD                                     | ---- | DSFVDRKVERLERKISACK               | ---- | VTTVESGTRALQYLG-LDGDNGS--SGLK--    | ---- | : 69  |
| ARR16        | : | ---- | HDEELHVLAVD                                     | ---- | DNLIDRKLVERLERKISSCK              | ---- | VTTAENALRALLEYLG-LGDQNHIDALTCN--   | ---- | : 83  |
| ARR17        | : | ---- | MEELHVLAVD                                      | ---- | DNLIDRKLVERLERKISSCK              | ---- | VTTAENGLRALLEYLG-LGDP--QOTDSL-TN-- | ---- | : 72  |
| OsRR1        | : | ---- | MEGGRGVTRVLLVD                                  | ---- | DSPVDRRVQLLSSSACAG                | ---- | SFHVIAVDSAKKAMEFGLK--              | ---- | : 54  |
| OsRR2        | : | ---- | MGAEAVRVLVD                                     | ---- | DSPVDRRVQLLRAHCGGGGAAAGEA-APFHV   | ---- | IAVDSGKAMELGRRRGDRDHLTPSSPAAA      | ---- | : 76  |
| OsRR3        | : | ---- | PEPHVLAVD                                       | ---- | DSIVDRTVSRLLRSSKYR                | ---- | VTTVDSGKRALEVL--SLDRN--            | ---- | : 55  |
| OsRR4        | : | ---- | ESRFHVLAVD                                      | ---- | DSLIDRKLLEMLKNSSYQ                | ---- | VTTVDSGSKALELGLRDEGDDSSSSP--SSSS   | ---- | : 66  |
| OsRR5        | : | ---- | APHVLAVD                                        | ---- | DSSVDRAVSGIRSSQFR                 | ---- | IAVDSGKRALEL--GSEPN--              | ---- | : 59  |
| OsRR6        | : | ---- | DEAQSEMHLAVD                                    | ---- | DSSVDRAVTAKIRSSKYR                | ---- | VTTVESATRALELCLGLVLPN--            | ---- | : 96  |
| OsRR7        | : | ---- | AQVVPLHDNASAEDDDDEDDDDDDDDDEEEAAPPYVMAVD        | ---- | DSSVDRAVTALIRSSKYR                | ---- | DSGKRALEL--GSEPN--                 | ---- | : 131 |
| OsRR8        | : | ---- | MSSPHVLVD                                       | ---- | DTHVDRHVSMALMRH                   | ---- | NVRVAVESVMQALMFLD                  | ---- | : 44  |
| OsRR9        | : | ---- | EAPFHVLAVD                                      | ---- | DSLPRKLERLEKTSFQGLAF              | ---- | VCVVTTVDSGSKALEFGLHDHEDSPISTQ      | ---- | : 68  |
| OsRR10       | : | ---- | EAPFHVLAVD                                      | ---- | DSLPRKLERLEKTSFQ                  | ---- | VTTVDSGSKALEFGLHDHEDSPISTQ         | ---- | : 61  |
| OsRR11       | : | ---- | APPHVLAVD                                       | ---- | DSSVDRAVTAGIRSSFR                 | ---- | IAVDSGKRALEL--GSEPN--              | ---- | : 72  |
| OsRR12       | : | ---- | MSSPHVLVD                                       | ---- | DTLVDHRVSMALMRH                   | ---- | NVRVAVESVMQALMFLD                  | ---- | : 44  |
| OsRR13       | : | ---- | MSSPHVLVD                                       | ---- | DTHVDRHVSMALMRH                   | ---- | NVRVAVESVMQALMFLD                  | ---- | : 44  |
| ARR1         | : | ---- | NPSHGRGLGSAGSSSG                                | ---- | RNQGGETVVMFPPSGLRVLVD             | ---- | DDPTCLMIERMERT                     | ---- | : 78  |
| ARR2         | : | ---- | NPGHGR                                          | ---- | GPDSSG                            | ---- | TAAGGSN--SDPFPANLRVLVD             | ---- | : 69  |
| ARR10        | : | ---- | MTMEQ                                           | ---- | EIEVLDPQFPVGMRLVD                 | ---- | DDQTLRILQTLQR                      | ---- | : 58  |
| ARR11        | : | ---- | MEKSGFS                                         | ---- | PVGLRVLVD                         | ---- | DDPTWKLIEKMKK                      | ---- | : 52  |
| ARR12        | : | ---- | MTVEQ                                           | ---- | NLEALDQFPVGMRLVD                  | ---- | DDQTLKIESELRH                      | ---- | : 58  |
| ARR13        | : | ---- | MAFAQSVYNQSSVLK                                 | ---- | INVMVVD                           | ---- | DNRVFLDIWSRMEK                     | ---- | : 60  |
| ARR14        | : | ---- | MPIND                                           | ---- | QFPGLRVLVD                        | ---- | DDTSCLEIEKMLLR                     | ---- | : 52  |
| ARR18        | : | ---- | MLVKGISGYEDNTRSLERETSETSLLSQFPG                 | ---- | NTNVLVVDNFTLL                     | ---- | NMKQIMKQYAYQ                       | ---- | : 75  |
| ARR19        | : | ---- | MSVFSNILDENSRNLREIPCDDGIPIND                    | ---- | DDEEFLTKSNRVLVGDNSNSLKNLMTQYSYQ   | ---- | TKYESGEBAMAFEMK                    | ---- | : 80  |
| ARR21        | : | ---- | MASQSFYNQSSVLK                                  | ---- | INVMVVD                           | ---- | DDHVFLDIWSRMEK                     | ---- | : 65  |
| OsRR21       | : | ---- | MAPVEDGGVVEFPVGMKVLVD                           | ---- | DDPTCLAVIKRMLLE                   | ---- | CRYDATTCSQATRALTMRE                | ---- | : 57  |
| OsRR22       | : | ---- | MLLGALRMEERKGLM--GRERDQFPVGMRLVD                | ---- | DDPVCLKVETLERR                    | ---- | CQYHTSTNQAITAKLRE                  | ---- | : 67  |
| OsRR23       | : | ---- | MRAAEERKGVVPAARRRDQFPVGMRLVD                    | ---- | DDPVCLKVETLERR                    | ---- | CQYHTSTNQAITAKLRE                  | ---- | : 65  |
| OsRR24       | : | ---- | MTVEERQGRVGGHGVSGGGGRDQFPVGMRLVD                | ---- | DDPTCLKVETLERR                    | ---- | CQYHTTTQAAATLKLRE                  | ---- | : 70  |
| OsRR25       | : | ---- | MAATQATAAR--KFPEGLRVLVD                         | ---- | DSPVCLMLEALERR                    | ---- | CKYQPTMTRDAATALRMRE                | ---- | : 57  |
| OsRR26       | : | ---- | MDATAFP                                         | ---- | YGLRVLVD                          | ---- | DDPTWKLIEKMKR                      | ---- | : 51  |
| OsRR27       | : | ---- | MAENNGAVPPGCKLPAGGFFGRLLHVLVD                   | ---- | DDAAYLEELKMLLAGYA                 | ---- | VTGKTTAEBAKEDVQDQ                  | ---- | : 65  |
| OsRR28       | : | ---- | MAQNEGIPNGTLSAMVD                               | ---- | EDKCHADSTCSMICTQLN                | ---- | FCVTVFTSPIKALDFLQD                 | ---- | : 54  |
| OsRR29       | : | ---- | MAQKEGLPAGRLSAMVD                               | ---- | EDKCHADSTCSMISALN                 | ---- | FSVTVFTSPIKALDFLQD                 | ---- | : 54  |
| OsRR30       | : | ---- | MASSGDTNTVMKYVANGAFDFL                          | ---- | KPVRIEELSNIQHIFRQ                 | ---- | QDHKNN                             | ---- | : 69  |
| OsRR31       | : | ---- | MEDQLSFPFGGLRVMPLVD                             | ---- | GDTKNTRTATKTLSTLHY                | ---- | SLVATHHTASAGCTHSSD                 | ---- | : 55  |
| OsRR32       | : | ---- | MEDMLSFFSSGLHVMPLVD                             | ---- | DDTKNTRTATKTLSTLHC                | ---- | PVSTHTTACAGRTLSGD                  | ---- | : 55  |
| OsRR33       | : | ---- | MDQARISFFPDGLRVMPLVD                            | ---- | DDAKAVRRATATSQLQY                 | ---- | AVVATHSTASAGRALSGD                 | ---- | : 56  |
| ARR22        | : | ---- | MATKSTGGTEKTSIEVKKKLINVLVD                      | ---- | DDPLNRRLHEMLIKTIG                 | ---- | GISQTAKNGEBAVILHRD                 | ---- | : 63  |
| ARR24        | : | ---- | MTRDQVAEELPNLAESKLVVLVD                         | ---- | DSFVNQTHQKLNRLG                   | ---- | IKNDVVINGKEAVDVYCS                 | ---- | : 59  |
| OsRR41       | : | ---- | MARKMIRVLLVE                                    | ---- | DEEINRVVRAALKAAGG                 | ---- | GDVDEAENGEVAVQRVRD                 | ---- | : 49  |
| OsRR42       | : | ---- | MAFQTQGSNLRALLVE                                | ---- | DIKVNRMILSQMLRKFQVE               | ---- | TTVVQNGKEAVELFLG                   | ---- | : 51  |
| ARR23        | : | ---- | MDLNGECK                                        | ---- | GGDFIDRSRVRILLCD                  | ---- | NDSTSLGEVFTLSECSYQ                 | ---- | : 14  |
| APRR1 / TOC1 | : | ---- | MDLNGECK                                        | ---- | GGDFIDRSRVRILLCD                  | ---- | NDSTSLGEVFTLSECSYQ                 | ---- | : 60  |
| APRR3        | : | ---- | NTNNVQISQQQPLAHVVKWERYLPVRSKVLLE                | ---- | NDSTRHIVTALRKNCSYE                | ---- | VAVPDVLEBWRILED                    | ---- | : 105 |
| APRR5        | : | ---- | VTVVKAPEAGGKLSRRKIRKADAGVDGLVKWERFLPKIALRVLLE   | ---- | ADDSTRQIAALRKCYSYR                | ---- | VAAVPDGLKAWETLKN                   | ---- | : 200 |
| APRR7        | : | ---- | GITMDVRNNGSSGGLQIPLS                            | ---- | QTAATVCWERFLHVTRIRVLLVE           | ---- | NDDCTRYIVTALRNCYSYE                | ---- | : 119 |
| APRR9        | : | ---- | DDGME                                           | ---- | TIKN-RVKSSEVVQWEKYLKTVLRLVLE      | ---- | SDYSTRQITLALRKCYSYK                | ---- | : 78  |
| APRR2        | : | ---- | MVITANDLSKWFNFKGLLILNGCSDSDGSSAAETRSEIES        | ---- | MDYI                              | ---- | VTTFTDEBALSAVVK                    | ---- | : 65  |
| APRR4        | : | ---- | QPLNMAEILDHRGVLTDGDDGPFPRNLTFNDFMSSNFPEGLRVLVD  | ---- | EDPSYLLIERHOK                     | ---- | FQYQVVICNEVNKAMHTLRN               | ---- | : 83  |
| APRR6        | : | ---- | MAGCLVPECADDISILLD                              | ---- | HDTASIASPMSMQFSKR                 | ---- | VMSVDVASKALSMIEK                   | ---- | : 54  |
| APRR8        | : | ---- | MENTEETERFSNDICVLLD                             | ---- | SDATCLANESMIRKCGYK                | ---- | VVATTRADDPLPHNN                    | ---- | : 55  |
| OsPRR1       | : | ---- | MVGAGEGDRVGGAAVGGGQFVDRSKVRIILLCD               | ---- | SDPSSRELRLLCNCYSYQ                | ---- | VTCASPROVINVINC                    | ---- | : 69  |
| OsPRR37      | : | ---- | GAGG--GGYSDDPDDGPIISGVORPPQ--VCWERFIQKTIKVLLE   | ---- | SDDSTRQVVSALRHCMYE                | ---- | VIPAENGGQWWTYLED                   | ---- | : 103 |
| OsPRR73      | : | ---- | GMGEDLPNGHSTPPPEPQQTDEQKHEQVQIVRWERFLPKVTLRVLLE | ---- | NDSTRQVVSALRKCYSYK                | ---- | VIPAENGLHAWQLED                    | ---- | : 122 |
| OsPRR59      | : | ---- | DADAAAAAAGGEGAAAAGVGTAGEGRGVRWDQILPRRSLRVLLE    | ---- | HDDSTRQVVSALRKCYSYR               | ---- | VAAVADGMKAWGVVRE                   | ---- | : 85  |
| OsPRR59      | : | ---- | GGVEERKVVLDLEDGDEEGEDAAAAGSSRETRMLPRMPVRLLE     | ---- | GDDSTRHICALLRKCYSYR               | ---- | VAAASDGVKAWDILKE                   | ---- | : 84  |
| OsPRR10      | : | ---- | MAGSCSVASSNKSLADEEFSVGMRLVLLD                   | ---- | ESTTYLKIITKLLLNCGYKGLTVTNFEITYVWR | ---- | DEVTPKTAARDAVEELHEN                | ---- | : 84  |
| OsPRR11      | : | ---- | MLNVMVD                                         | ---- | EDRRHAYSTSSML-TQFN                | ---- | FCVTVYTSPIKALDFLEN                 | ---- | : 43  |
| OsPRR12      | : | ---- | MAQRVGHSDAGVFMVVD                               | ---- | EDKSHANFARGML-SSLN                | ---- | FHVIVYSSPVNALVLEN                  | ---- | : 53  |
| GmRR1        | : | ---- | EDSHEVHVLAVD                                    | ---- | DSLVDKVERLERKISACK                | ---- | VTAVDSGIRALQYLG-LDEQRRTSESDFVFP    | ---- | : 75  |
| GmRR2        | : | ---- | SGAPELHVLAVD                                    | ---- | DSLVDKVERLERKISSCK                | ---- | VTTVESGTRALQYLG-LEGGENS--LGFD--    | ---- | : 77  |
| GmRR3        | : | ---- | SGAPELOVLAVD                                    | ---- | DSLVDKVERLERISSCK                 | ---- | VTTVESGTRALQYLG-LDGGNSS--LGFD--    | ---- | : 77  |
| GmRR4        | : | ---- | QKQSEEVHVLAVD                                   | ---- | DSIVDRKVERLERKVLACK               | ---- | VTAVDSGLRALQYLG-GLLDEQKIPSETNGFV-- | ---- | : 84  |
| GmRR5        | : | ---- | QKQSEEVHVLAVD                                   | ---- | DSTVDRKVERLERKVLACK               | ---- | VTAVDSGLRALQYLG-GLLDEQKIPSETNGFV-- | ---- | : 84  |
| GmRR6        | : | ---- | EAQFHVLAVD                                      | ---- | DSIIDRMLERLEKTSFPH                | ---- | VTTVDSATKALKEFGLVEDELRTFDTT--VAS   | ---- | : 64  |
| GmRR7        | : | ---- | QLQQQPQHFLVAVD                                  | ---- | DSVIDRKLERLERGSSCK                | ---- | VTCVDSGDKALKYGLLID-ELDDTSSTSESE    | ---- | : 80  |
| GmRR8        | : | ---- | QLQQQPQHFLVAVD                                  | ---- | DSVIDRKLERLERGSSCK                | ---- | VTCVDSGDKALKYGLLID-ELDDTSSTSESE    | ---- | : 79  |
| GmRR9        | : | ---- | ESQFHVLAVD                                      | ---- | DSIIDRMLERLEKTSFPH                | ---- | VTTVDSGSKALEFGLRENDESNSPISV-VCPC   | ---- | : 66  |
| GmRR10       | : | ---- | ESQFHVLAVD                                      | ---- | DSLIDRKLERLERISSYE                | ---- | VTTVDSGSKALEFGLRENDESNSPISV-VCPC   | ---- | : 65  |
| GmRR11       | : | ---- | EAQFHVLAVD                                      | ---- | DSLIDRMLERLEKTSFPH                | ---- | VTALDSGSKALKEFGLVEDEQRNKEPP-SIAL   | ---- | : 65  |
| GmRR12       | : | ---- | EAQFHVLAVD                                      | ---- | DSLIDRMLERLEKTSFPH                | ---- | VTALDSGSKALKEFGLVEDEQRNKEPP-SIAL   | ---- | : 65  |
| GmRR13       | : | ---- | EQQQPHFLVAVD                                    | ---- | DSVIDRKLERLERDSSCK                | ---- | ATFVDSGDKALKEFGLLDDDDNSSTSES-      | ---- | : 74  |
| GmRR14       | : | ---- | GAGKLVHVLAVD                                    | ---- | DSHVDRKVERLERKISSCK               | ---- | VTTVESGSRALQYLG-LDGEKSS--IGFD--    | ---- | : 72  |
| GmRR15       | : | ---- | AAGKLVHVLAVD                                    | ---- | DSHVDRKVERLERKISSCK               | ---- | VTTVESGSRALQYLG-LDGEKSS--IGLD--    | ---- | : 72  |
| GmRR16       | : | ---- | GDVPHVLAVD                                      | ---- | DNLIDRKLVEKLRNNSCK                | ---- | VTTAENGRPRALELGL-LTSGGQNNMNGR      | ---- | : 69  |
| GmRR17       | : | ---- | GDVPHVLAVD                                      | ---- | DNLIDRKLVEKLRNNSCK                | ---- | VTTAENGRPRALELGL-LTSGGQNNMNGR      | ---- | : 69  |
| GmRR18       | : | ---- | EAQFHVLAVD                                      | ---- | DSIIDRMLERLEKTSFPH                | ---- | VTTLDSATKALKEFGLVEDELRTFDTT--VAS   | ---- | : 64  |
| GmRR19       | : | ---- | NLSNGK                                          | ---- | GSMSTLTA                          | ---- | SVMKSGDAVSDQFPAGLRVLVD             | ---- | : 74  |
| GmRR20       | : | ---- | NLSHGK                                          | ---- | GSTS                              | ---- | SSPLKAGDVTSDQFPAGLRVLVD            | ---- | : 70  |
| GmRR21       | : | ---- | NLSNGK                                          | ---- | GSMSTLTA                          | ---- | SVMKSGDAVSDQFPAGLRVLVD             | ---- | : 74  |
| GmRR22       | : | ---- | NLSNGK                                          | ---- | GSTS                              | ---- | SSPLKAGDSVSDQFPAGLRVLVD            | ---- | : 70  |
| GmRR23       | : | ---- | NLSNGK                                          | ---- | GSTS                              | ---- | MDNGCFSSPRD-FPAGLRVLVD             | ---- | : 58  |
| GmRR24       | : | ---- | NLSNGK                                          | ---- | GSTS                              | ---- | MDNGCFSSPRD-FPAGLRVLVD             | ---- | : 59  |
| GmRR25       | : | ---- | MPN                                             | ---- |                                   | ---- |                                    | ---- | : 20  |
| GmRR26       | : | ---- | MTVEK                                           | ---- | KRNDSGDEFVGMRLVAVD                | ---- | DDPTCLLVKTLQR                      | ---- | : 59  |
| GmRR27       | : | ---- | MTVVEN                                          | ---- | HTMDDLDRDQFPVGMRLVAVD             | ---- | DDPTCLMVETLERR                     | ---- | : 61  |
| GmRR28       | : | ---- | MTVVEN                                          | ---- | HTMDDLDRDQFPVGMRLVAVD             | ---- | DDPTCLMVETLERR                     | ---- | : 53  |
| GmRR29       | : | ---- | MAVEK                                           | ---- | QREDEGCDRFPVGMRLVAVD              | ---- | DDPICLKVLENLRR                     | ---- | : 60  |
| GmRR30       | : | ---- | MAVEN                                           | ---- | QREDEGCDRFPVGMRLVAVD              | ---- | DDPICLKVLENLRR                     | ---- | : 60  |
| GmRR31       | : | ---- | MTVEK                                           | ---- | KMNDSGDEFVGMRLVAVD                | ---- | DDPTCLLVETLERR                     | ---- | : 59  |
| GmRR32       | : | ---- | MVVG                                            | ---- | DRFPVGMRLVAVD                     | ---- | DDKCTLVLENLRR                      | ---- | : 52  |
| GmRR33       | : | ---- | MAPAAA                                          | ---- | EFVGLRVLVD                        | ---- | DDATTLKIEQMSIR                     | ---- | : 53  |
| GmRR34       | : | ---- | MAHQLGTLKLTALVVD                                | ---- | MAHQNLGTLKLTALVVD                 | ---- | DNKINRKHQKLEESVG                   | ---- | : 51  |
| GmRR35       | : | ---- | MTYSTE                                          | ---- |                                   | ---- | R--FIKLEESVG                       | ---- | : 35  |
| GmRR36       | : | ---- | MEPR                                            | ---- | QLTALIVE                          | ---- | DDMIRMVHQKLEESVG                   | ---- | : 47  |
| GmPRR37      | : | ---- | MESGDEINLNIESGNGKSGGDFVDRSKVRIILLCD             | ---- | NDSKSSQEVFTLRLRCSYQ               | ---- | VTSVKARQVDAFNA                     | ---- | : 71  |
| GmPRR38      | : | ---- |                                                 | ---- |                                   | ---- |                                    | ---- | : -   |
| GmPRR39      | : | ---- | HARGDDGGS                                       | ---- | GSKGGAHLKGFMRWEKFLPKMILRVLLE      | ---- | ADDSTRQIAALRKCYSYK                 | ---- | : 139 |
| GmPRR40      | : | ---- | DCLRMGEVPAVMQATQGEQSNNASAVHWERFLPRMVLRLVLE      | ---- | ADDSTRQIAALRKCYSYK                | ---- | VVAFCDGLKAWETLKN                   | ---- | : 124 |
| GmPRR41      | : | ---- |                                                 | ---- |                                   | ---- |                                    | ---- | : -   |
| GmPRR42      | : | ---- |                                                 | ---- |                                   | ---- |                                    | ---- | : -   |
| GmPRR43      | : | ---- | VEKEDSGGS                                       | ---- | GSK--AGEFKGLMRWEKFLPKMVLRLVLE     | ---- | ADDSTRQIAALRKCYSYK                 | ---- | : 90  |
| GmPRR44      | : | ---- | MDELNCAMTTTTENS                                 | ---- | AELVQWERFLPRMVLRLVLE              | ---- | ADHSTRQIAALRKCYSYK                 | ---- | : 73  |
| GmPRR45      | : | ---- | MDELNGAMTT                                      | ---- | ENSN-AEVRWERFLPRMVLRLVLE          | ---- | ADHSTRQIAALRKCYSYK                 | ---- | : 70  |
| GmPRR46      | : | ---- | MVFSANDLQEWKDFPKGLKVLLE                         | ---- | RDNISAAEIRAKLEA                   | ---- | MDYNSTFCENBALSASS                  | ---- | : 59  |
| GmPRR47      | : | ---- | MVFTANDLQEWKDFPKGLKVLLE                         | ---- | RDNISAAEIRAKLEA                   | ---- | MDYNSTFCENBALSASS                  | ---- | : 59  |
| GmPRR48      | : | ---- | MVCTANDLQEWKDFPKGLKVLLE                         | ---- | GDSSAAEIRAKLEA                    | ---- | VDYNSTFYDENBALSASS                 | ---- | : 59  |
| GmPRR49      | : | ---- | MVCTANDLQEWKDFPKGLKVLLE                         | ---- | GDSSAAEIRAKLEA                    | ---- | MDYKSTFYDENBALSASS                 | ---- | : 59  |

ARR3 : ---LKVDLIITDYCMP-GMTGYELKKK-K-ESTSFKEVPVVIMS-----SENVMTRIDRCLE : 137  
ARR4 : ---LKVDLIITDYCMP-GMTGYELKKK-K-ESSNFRBVPVVIMS-----SENVLTRIDRCLE : 138  
ARR5 : ---DLKINLIMTDYSMP-GMTGYELKKK-K-ESSAFREIPVVIMS-----SENLPRIDRCLE : 130  
ARR6 : ---DLKVNLIITDYCMP-GMTGYELKKK-K-ESSAFREVPVVIMS-----SENLPRIDRCLE : 129  
ARR7 : ---DLKVNLIITDYCMP-GLSGYDLKKK-K-ESSAFREVPVVIMS-----SENLPRIDRCLE : 128  
ARR8 : : QIH---QVEINLIITDYCMP-GMTGYDLKKK-K-ESAAFRSIPVVIMS-----SENVPARISRCLE : 121  
ARR9 : : VNH---QVVEVNLITDYCMP-GMTGYDLKKK-K-ESSAFRDIPVVIMS-----SENVPARISRCLE : 123  
ARR15 : ---DLKVNLIITDYCMP-GLTGYELKKK-K-ESSALREIPVVIMS-----SENIQPRIEQCMI : 122  
ARR16 : ---VMKVSIIITDYCMP-GMTGYELKKK-K-ESSNLREVPVVIMS-----SENIPTRIDRCLE : 136  
ARR17 : ---VMKVNLIITDYCMP-GMTGYELKKK-K-ESSNLKEVPVVIMS-----SENIPTRIDRCLE : 125  
OsRR1 : : EEG---KEQAIMVLTIDYCMP-EMTGYELKKK-K-ALSPKLPVPVVIMS-----SENEPQRISRCMN : 111  
OsRR2 : : AAA---NDQAIIDIVLTDYCMP-EMTGYDLKKK-K-ALGSPNPVPVVIMS-----SENEPQRISRCIT : 133  
OsRR3 : ---VHMIITDYCMP-EMTGYDLKKK-K-ESAELEKVPVVIMS-----SENSPTRIDRCLE : 105  
OsRR4 : : PDH---QEIDVNLITDYCMP-GMTGYDLKKK-K-GSSSLKDPVVIMS-----SENVPARINRCLE : 123  
OsRR5 : ---VSMIITDYWMP-EMTGYELKKK-K-ESSRLEKVPVVIMS-----SENVSTRINRCLE : 109  
OsRR6 : ---VNMIIITDYWMP-GMTGYELKKK-K-ESSQLKEVPVVIMS-----SENVPNRISRCLE : 146  
OsRR7 : ---VSMIITDYWMP-EMTGYDLKKK-K-ESSELKQIPVVIMS-----SENVPTRISRCLE : 181  
OsRR8 : ---SEHDVDMIVSDYCMP-DMTGYDLKMEVK-KSPKLAHLPVVIAS-----SDNIPERIRKCLD : 98  
OsRR9 : : SDQ---QEVAVNLITDYCMP-GMTGYDLKKK-K-ESSYLRDIPVVIMS-----SDNIPSRINRCLE : 125  
OsRR10 : : SDQ---QEVGNLITDYCMP-GMTGYDLKKK-K-ESSYLRDIPVVIMS-----SDNIPSRINRCLE : 118  
OsRR11 : ---VSMIITDYWMP-EMTGYELKKK-K-ESSKLLKIPVVIMS-----SENVPTRISRCLE : 122  
OsRR12 : ---SEHDVNMIVSDYCMP-DMTGYDLKMEVK-KSPKLAHLPVVIAS-----SDNIPERIRKCLD : 98  
OsRR13 : ---SEHDVNMIVSDYCMP-EMTGYDLKMEVK-KSPRLVHLPVVIAS-----SDNIPERIRKCFD : 98  
ARR1 : ---NKHGFDIVISDVHMP-DMDGFKLLEHVG---LEMDLPVIMMS-----ADDSKSVVLRKGV : 129  
ARR2 : ---NKNGFDIVISDVHMP-DMDGFKLLEHVG---LEMDLPVIMMS-----ADDSKSVVLRKGV : 120  
ARR10 : ---NKNKFDLIVISDVHMP-DMDGFKLLEHVG---LEMDLPVIMMS-----AHSDPKYVMKGV : 109  
ARR11 : ---RKDGYDIVISDVHMP-DMDGFKLLEHVG---LEMDLPVIMMS-----VDGETSRVMKGV : 103  
ARR12 : ---NKNKFDLIVISDVHMP-DMDGFKLLEHVG---LEMDLPVIMMS-----AHSDPKYVMKGV : 109  
ARR13 : ---QRDNIDLIITDYMP-GMNGLOLKKQIT---QEFGNLSVLVMS-----SD--PNKEEESLS : 110  
ARR14 : ---RKDSFDLIVISDVHMP-GMNGYNLQOYG---LEMDLPVIMMS-----VDGRTTVMKGIN : 104  
ARR18 : ---NSNMFDLIVISDVHMP-DTDGFKLLEHVG---LEMDLPVIMMS-----AHSYDYSVMKGI : 92  
ARR19 : ---CKHEINLIVWDFHMP-GTDGLQAKKST---SKLD-LPVVIMS-----DDNQTESVMKATF : 126  
ARR20 : ---NKHEIDLIVWDFHMP-DINGLDAKNI---KQMD-LPVVIMS-----HEYKKTVMKSTK : 131  
ARR21 : ---QRDNIDLIITDYMP-GMNGLOLKKQIT---QEFGNLSVLVMS-----SD--TNKEEESLS : 115  
OsRR21 : ---NRRGFDIVISDVHMP-DMDGFKLLEHVG---LEMDLPVIMMS-----ADSRDITVMKGI : 108  
OsRR22 : ---NRDMFDLIVISDVHMP-DMDGFKLLEHVG---LEMDLPVIMMS-----VNGETKTVLKGIT : 118  
OsRR23 : ---NRDMFDLIVISDVHMP-DMDGFKLLEHVG---LEMDLPVIMMS-----VNGETKTVLKGIT : 116  
OsRR24 : ---NKDQFDLIVISDVHMP-DMDGFKLLEHVG---LEMDLPVIMMS-----ANGETQTVLKGIT : 121  
OsRR25 : ---RPGDFDLIVISDVHMP-DMDGFKLLEHVG---LEMDLPVIMMS-----ANGELETVMKGV : 108  
OsRR26 : ---RKNKFDLIVISDVHMP-DMDGFKLLEHVG---LEMDLPVIMMS-----IDGETSRVMKGV : 102  
OsRR27 : ---PEDYFHLVMTDVHMS-GMDGFDLHRRN---GRVPVIMFS-----EGEDVVMVMKIV : 114  
OsRR28 : ---QAEGVHLVADVQME-EMNGFEFVKVAR---ELHKSIOVIMMS-----TETTYTVMKICV : 106  
OsRR29 : ---HAEGVHLVADVHME-EMNGFDFVKVAR---ELHKSIOVIMMS-----TETTYTVMKICV : 106  
OsRR30 : ---ATPATRSTATEASLAPLENE-RDDVWYNGEITDRLDCKGK-----RLTWTQVHGF : 124  
OsRR31 : ---NMTDVQTVLQVKKV-VSSGDFRRVVE---TEHHIPVYLLSSTPEQMVAGEDTEFLNHLKATYIVRKLPLDQATMAQLWRVVAWRCCLEERIPRDSMDDIAA : 158  
OsRR32 : ---NMLDVQTVLQVSKV-VSSGDFRRVVE---TEHQIPVYLLS-----QERVPGDSMDDIAA : 105  
OsRR33 : ---NVVEIQALICDVHKV-VSSGDFRRVVE---SELRIPVYLLSKMEEEDMVAGEDAEFLNHLTATYIVRKLPLNPTVMARLWRVVAWRMYCLEERIQAAN---VAA : 155  
ARR2 : ---GEASFLLIMDKEMP-ERDVSSTTKKER---EMKVTSMLVGV : 116  
ARR24 : ---G-GNYDLILMDMDMP-IMNGIEATKER---EMGIESKTAGVT---TRAN-EGEKFEFME : 110  
OsRR41 : ---AAAPYDLVIMDKQMP-VMDGHEATRRR---GMGVTPVAVS---SDGL-PADVDAFIT : 101  
OsRR42 : ---GETFDIVLTDNLMP-IMTGPAAKSKR---AMGATDVMIIVG---VSDANSMEEFK : 100  
ARR23 : ---QFNIDVVIITDYHMP-GLNGVQKRRID---EEFGNLPVIDLY---R---NIEHELF : 62  
APRR1 / TOC1 : ---EGPDIDILAEIDLMP-MAKGKMLRYTR-DKDLRRIPVIMMS-----RDEVPVVMKCLK : 114  
APRR3 : ---EKSCIDLVLTEVDMP-VHSGTGLSKIMS-HKTLKNIPVIMMS-----SHDSMVLVFKCLS : 159  
APRR5 : ---KPESVDLILTEVDLP-SISGFSLTLTME-HDICKNIPVIMMS-----TQDSVNTVYKCM : 254  
APRR7 : ---LNNHIDLIVLTEVIMP-YLSIGLCKLNL-HKSRRNIPVIMMS-----SHDSMGLVFKCLS : 173  
APRR9 : ---KSHNIDLILTELDLP-SISGFALLSLTME-HACKNIPVIMMS-----SODSIKMLVFKCM : 132  
APRR2 : ---NPESFHAIIVEVNSAESESEFKFEAAK---DVLPTIMIS---TDHCITTTMCKIA : 115  
APRR4 : ---HRNRFDLAMIQVNA-EGDIERFSEIG---SEMPLIIIS---EDSVKSVKMWI : 134  
APRR6 : ---QKKEIGLILANIEM-HDSSHFNAL---LKDILPILIN---PEIKTKPSDLT : 104  
APRR8 : ---KDKIDLVLAEFRIL-EMNKYELLEKER---SICIPVVSIG---AHVKDALTVECLC : 105  
OsPRR1 : ---EAGEIDILAEVDLP-VSKCFKMLKYAR-NKELRHIPVIMMS-----NRDEVSVVVMKCLR : 123  
OsPRR37 : ---MQNSIDLVLTEVVMMP-GVSGISLSTRIMN-HNICKNIPVIMMS-----SNDAMGTVMKCLS : 157  
OsPRR73 : ---LQNHIDLVLTEVVMMP-RISGIGLSKITS-HKICKDIPVIMMS-----SNDSMGTVMKCLS : 176  
OsPRR59 : ---RAYAFDLVLTEVTMP-TLSGIELSRVVA-SDECKNIPVIMMS-----SODSIGTVLRCV : 139  
OsPRR95 : ---KSFNIDLVLTEVELP-LMSGFLSLSTIME-HDACKNIPVIMMS-----SNDSDKTVLRCV : 138  
OsPRR10 : ---PWSYDMVLTVEVHAGIDGFLNLOYAG---TDMDLPVVVFS---ADDDKRTVLRKCVN : 135  
OsPRR11 : ---HAQDFDLVLAEVHME-ELNGFAFTASR---KIHKSTQVIN--- : 80  
OsPRR12 : ---NAQDVAVLAAVDMK-QLSDFQFEEAAR---VKRQDLQVIMMS-----AETMTSTMMKCVK : 105  
GmRR1 : ---DLKVDLIITDYCMP-EMTGYELKKK-K-ESTMFRBIPVVIMS-----SENLPRIDRCLE : 128  
GmRR2 : ---SVKVNLIIMTDYSMP-GMTGYELKKK-KQESSVFREIPVVIMS-----SENVLTRIDRCLE : 131  
GmRR3 : ---SVKVNLIIMTDYSMP-GMTGYELKKK-KQESSVFREIPVVIMS-----SENVLTRIDRCLE : 131  
GmRR4 : ---GLKVDLIITDYCMP-GMTGYELKKK-K-ESSSFKETPVVIMS-----SENVLPRIDRCLE : 137  
GmRR5 : ---GLKVDLIITDYCMP-GMTGYELKKK-K-ESSTFKETPVVIMS-----SENVLPRIDRCLE : 137  
GmRR6 : : EIH---QVDVNLITDYCMP-GMTGYDLKKK-K-ESKSLKNIPVVIMS-----SENVPSRINRCLE : 121  
GmRR7 : : SSHPPPQPLQREGIKVNLIIMTDYCMP-GMSGYDLKKK-K-GSSWKDVPVVIMS-----SENVPSRISMCLE : 144  
GmRR8 : : SSHPPPQPLQREGIKVNLIIMTDYCMP-GMSGYDLKKK-K-GSSWKDVPVVIMS-----SENVPSRISMCLE : 143  
GmRR9 : : NNHQP---QVEVNLIITDYCMP-GMTGYDLKKK-K-ESSSLRNIPVVIMS-----SENVPSRINRCLE : 125  
GmRR10 : : NNH---QVEVNLIITDYCMP-GMTGYDLKKK-K-ESSSLRNIPVVIMS-----SENVPSRINRCLE : 122  
GmRR11 : : ESH---QDVEVNLITDYCMP-EMTGYDLKKK-K-ESKSLKDPVVIMS-----SENVPARINRCLE : 122  
GmRR12 : : ESH---QDVEVNLITDYCMP-EMTGYDLKKK-K-ESKSLKDPVVIMS-----SENVPARINRCLE : 122  
GmRR13 : ---LQNLGKVNMIIMTDYCMP-GMSGYDLKKK-K-GSSWKDVPVVIMS-----SENVPSRISMCLE : 130  
GmRR14 : ---SVDVNLIMTDYSMP-GMTGYELKKK-K-ESSVFREVPVVIMS-----SENLTRIDRCLE : 125  
GmRR15 : ---SVKVNLIIMTDYSMP-GMTGYELKKK-K-ESSVFREVPVVIMS-----SENLTRIDRCLE : 125  
GmRR16 : ---SKVNMVIITDYCMP-GMTGYELKKK-K-ESSVTKEVPVVIMS-----SENIPTRIDRCLE : 121  
GmRR17 : ---SKVNMVIITDYCMP-GMTGYELKKK-K-ESSVMKEVPVVIMS-----SENIPTRIDRCLE : 121  
GmRR18 : : EIH---QVDVNLITDYCMP-GLTGYDLKKK-K-ESKSLKNIPVVIMS-----SENVPSRINRCLE : 121  
GmRR19 : ---NKNGFDIVISDVHMP-DMDGFKLLEHVG---LEMDLPVIMMS-----ADDSKSVVLRKGV : 125  
GmRR20 : ---NKNGFDIVISDVHMP-DMDGFKLLEHVG---LEMDLPVIMMS-----ADDSKSVVLRKGV : 121  
GmRR21 : ---NKNGFDIVISDVHMP-DMDGFKLLEHVG---LEMDLPVIMMS-----ADDSKSVVLRKGV : 125  
GmRR22 : ---NKNGFDIVISDVHMP-DMDGFKLLEHVG---LEMDLPVIMMS-----ADDSKSVVLRKGV : 121  
GmRR23 : ---RKDGYDIVISDVHMP-DMDGFKLLEHVG---LEMDLPVIMMS-----VDGETSRVMKGV : 109  
GmRR24 : ---RKDAYDIVISDVHMP-DMDGFKLLEHVG---LEMDLPVIMMS-----VDGETSRVMKGV : 110  
GmRR25 : ---RKEAYDIVISDVHMP-DMDGFKLLEHVG---LEMDLPVIMMS-----VDGETSRVMKGV : 71  
GmRR26 : ---HKDKFDLIVISDVHMP-DMDGFKLLEHVG---LEMDLPVIMMS-----ANGDTKVMKGIS : 110  
GmRR27 : ---NKTMFDLIVISDVHMP-DMDGFKLLEHVG---LEMDLPVIMMS-----VNDDPKVMKGI : 112  
GmRR28 : ---NKTMFDLIVISDVHMP-DMDGFKLLEHVG---LEMDLPVIMMS-----VNDDPKVMKGI : 104  
GmRR29 : ---NRNKFDLIVISDVHMP-DMDGFKLLEHVG---LEMDLPVIMMS-----AHGDTKVMKGI : 111  
GmRR30 : ---NRNKFDLIVISDVHMP-DMDGFKLLEHVG---LEMDLPVIMMS-----AHGDTKVMKGI : 111  
GmRR31 : ---HKDKFDLIVISDVHMP-DMDGFKLLEHVG---LEMDLPVIMMS-----ANGDTKVMKGIS : 110  
GmRR32 : ---NRNKFDLIVISDVHMP-DMDGFKLLEHVG---LEMDLPVIMMS-----GYDKERVMKGI : 103  
GmRR33 : ---RKGFCDVVLSDVHMP-DMDGFKLLEHVG---LEMDLPVIMMS-----GDSTTSVAVMKGI : 104  
GmRR34 : ---G-QRFDLILMDMDMP-IMNGIEATKER---SMGIGSMIVGVS---SRCT-EAERIRFME : 102  
GmRR35 : ---G-QIFDLILMDMDMP-IMNGIEATKER---SMGIGSMIVGVS---SRCT-EAERIRFME : 86  
GmRR36 : ---G-QSFDLILMDMDMP-IMNGIEATKER---SMGINSMTGVS---TRSV-AAHIREFME : 98  
GmPRR37 : ---EGQHIDILAEIDLMP-MKKGKMLKYAQ-DKEFRRIIPVIMMS-----AQDEVSIVVMKCLR : 125  
GmPRR38 : ---RPHNVDLILTEVDLP-SVSGYALLTLTME-HEICKNIPVIMMS-----SODSISTVYKCM : 193  
GmPRR39 : ---KAFDLDLILTEVDLP-SISGFSLTLTME-HDICKNIPVIMMS-----SHDSVMVFKCM : 178  
GmPRR41 : ---MP-GLSIGLKYKMG-HKTRKNIPVIMMS-----SHDSMGLVFKCLS : 41  
GmPRR42 : ---MP-ILSIGLCKIMS-HKTLKNIPVIMMS-----SHDSMGLVFKCLS : 41  
GmPRR43 : ---RPHNVDLILTEVDLP-SISGFALLSLTME-HEICKNIPVIMMS-----SODSISTVYKCM : 144  
GmPRR44 : ---KASELDLILTEVELP-AISGFALLSLTME-HDICKNIPVIMMS-----SHDSVNMALKCM : 127  
GmPRR45 : ---KAPELDILTEVELP-AISGFALLSLTME-HDICKNIPVIMMS-----SHDSVNMALKCM : 124  
GmPRR46 : ---GLESFHAIIVEVSSSSGQGFKEENAK---D-LPTIMTS---NNHCLNTMMCKIA : 108  
GmPRR47 : ---GLESFHAIIVEVSSSSAQQGFKEENAK---D-LPTIMTS---NNHCLNTMMCKIA : 108  
GmPRR48 : ---SPEGFHAIIVEVSTSCSLGFKFENAK---D-LPTIMTS---KDQCLNTMMCKIA : 108  
GmPRR49 : ---SPKGFHAIIVEVSTSCSLGFKFENAK---D-LPTIMTS---KDQCLNTMMCKIA : 108



|              |                                                                                                                      |   |     |
|--------------|----------------------------------------------------------------------------------------------------------------------|---|-----|
| ARR3         | : PGLA                                                                                                               | : | 231 |
| ARR4         | : PGLD                                                                                                               | : | 259 |
| ARR5         | :                                                                                                                    | : | -   |
| ARR6         | :                                                                                                                    | : | -   |
| ARR7         | : FSL                                                                                                                | : | 206 |
| ARR8         | : NDITTSV                                                                                                            | : | 225 |
| ARR9         | : DGIATAV                                                                                                            | : | 234 |
| ARR15        | :                                                                                                                    | : | -   |
| ARR16        | :                                                                                                                    | : | -   |
| ARR17        | :                                                                                                                    | : | -   |
| OsRR1        | : NLWCA                                                                                                              | : | 231 |
| OsRR2        | : SLWCA                                                                                                              | : | 252 |
| OsRR3        | :                                                                                                                    | : | -   |
| OsRR4        | : SSTSSGLAVET                                                                                                        | : | 232 |
| OsRR5        | :                                                                                                                    | : | -   |
| OsRR6        | :                                                                                                                    | : | -   |
| OsRR7        | :                                                                                                                    | : | -   |
| OsRR8        | :                                                                                                                    | : | -   |
| OsRR9        | : S                                                                                                                  | : | 208 |
| OsRR10       | : S                                                                                                                  | : | 201 |
| OsRR11       | :                                                                                                                    | : | -   |
| OsRR12       | :                                                                                                                    | : | -   |
| OsRR13       | :                                                                                                                    | : | -   |
| ARR1         | : VWSVELH                                                                                                            | : | 295 |
| ARR2         | : VWSVELH                                                                                                            | : | 274 |
| ARR10        | : LWTHELH                                                                                                            | : | 241 |
| ARR11        | : VWSFELH                                                                                                            | : | 252 |
| ARR12        | : VWTVELH                                                                                                            | : | 253 |
| ARR13        | : WWTNPLQ                                                                                                            | : | 283 |
| ARR14        | : VWSIELH                                                                                                            | : | 258 |
| ARR18        | : VWSQELH                                                                                                            | : | 235 |
| ARR19        | : TWTEVIQPVQSNLVQTKFQGQL                                                                                             | : | 316 |
| ARR20        | : QWTPELH                                                                                                            | : | 274 |
| ARR21        | : QWTDLSH                                                                                                            | : | 288 |
| OsRR21       | : VWSVELH                                                                                                            | : | 260 |
| OsRR22       | : VWSVELH                                                                                                            | : | 275 |
| OsRR23       | : VWSVELH                                                                                                            | : | 272 |
| OsRR24       | : VWSVELH                                                                                                            | : | 271 |
| OsRR25       | : VWTPELH                                                                                                            | : | 244 |
| OsRR26       | : VWSVDLH                                                                                                            | : | 250 |
| OsRR27       | : LVPSGVQ                                                                                                            | : | 263 |
| OsRR28       | : QWPHLQ                                                                                                             | : | 220 |
| OsRR29       | : MWTPHLQ                                                                                                            | : | 223 |
| OsRR30       | : IMDYSLP                                                                                                            | : | 232 |
| OsRR31       | : QHVASHL                                                                                                            | : | 276 |
| OsRR32       | : QHVASHL                                                                                                            | : | 245 |
| OsRR33       | : TRILQHI                                                                                                            | : | 275 |
| ARR22        | :                                                                                                                    | : | -   |
| ARR24        | :                                                                                                                    | : | -   |
| OsRR41       | :                                                                                                                    | : | -   |
| OsRR42       | :                                                                                                                    | : | -   |
| ARR23        | : KWTKPLQ                                                                                                            | : | 145 |
| APRR1 / TOC1 | : EWSVAT                                                                                                             | : | 215 |
| APRR3        | : ASDTK                                                                                                              | : | 297 |
| APRR5        | : EGES                                                                                                               | : | 345 |
| APRR7        | : AVDVDD                                                                                                             | : | 320 |
| APRR9        | :                                                                                                                    | : | 206 |
| APRR2        | : LD-GDCQ                                                                                                            | : | 245 |
| APRR4        | : VWDEELH                                                                                                            | : | 281 |
| APRR6        | : RKSLWNS                                                                                                            | : | 280 |
| APRR8        | : LFADDLQN                                                                                                           | : | 245 |
| OsPRR1       | : ESNPSD                                                                                                             | : | 219 |
| OsPRR37      | : AVEID                                                                                                              | : | 308 |
| OsPRR73      | : AVEID                                                                                                              | : | 333 |
| OsPRR59      | : VADGGAGSSRE                                                                                                        | : | 290 |
| OsPRR95      | : EADSRQTN                                                                                                           | : | 262 |
| OsPRR10      | : PIGETVHG                                                                                                           | : | 303 |
| OsPRR11      | :                                                                                                                    | : | 139 |
| OsPRR12      | :                                                                                                                    | : | -   |
| GmRR1        | : TD                                                                                                                 | : | 240 |
| GmRR2        | :                                                                                                                    | : | -   |
| GmRR3        | :                                                                                                                    | : | -   |
| GmRR4        | : TD                                                                                                                 | : | 223 |
| GmRR5        | : TD                                                                                                                 | : | 222 |
| GmRR6        | : SS                                                                                                                 | : | 179 |
| GmRR7        | : LAVV                                                                                                               | : | 235 |
| GmRR8        | : LAVV                                                                                                               | : | 232 |
| GmRR9        | : RYSGIATVV                                                                                                          | : | 248 |
| GmRR10       | : RYSGIATVV                                                                                                          | : | 246 |
| GmRR11       | : EPQKVVNFS                                                                                                          | : | 187 |
| GmRR12       | :                                                                                                                    | : | -   |
| GmRR13       | :                                                                                                                    | : | -   |
| GmRR14       | :                                                                                                                    | : | -   |
| GmRR15       | :                                                                                                                    | : | -   |
| GmRR16       | :                                                                                                                    | : | -   |
| GmRR17       | :                                                                                                                    | : | -   |
| GmRR18       | : SS                                                                                                                 | : | 179 |
| GmRR19       | : VWSVELH                                                                                                            | : | 271 |
| GmRR20       | : VWSVELH                                                                                                            | : | 265 |
| GmRR21       | : VWSVELH                                                                                                            | : | 271 |
| GmRR22       | : VWSVELH                                                                                                            | : | 265 |
| GmRR23       | : VWSVDLH                                                                                                            | : | 242 |
| GmRR24       | : VWSVDLH                                                                                                            | : | 260 |
| GmRR25       | : VWSVDLH                                                                                                            | : | 221 |
| GmRR26       | : VWSVDLH                                                                                                            | : | 262 |
| GmRR27       | : VWSVELH                                                                                                            | : | 264 |
| GmRR28       | : VWSVELH                                                                                                            | : | 256 |
| GmRR29       | : VWSVELH                                                                                                            | : | 262 |
| GmRR30       | : VWSVELH                                                                                                            | : | 262 |
| GmRR31       | : VWSVELH                                                                                                            | : | 256 |
| GmRR32       | : VWDDELH                                                                                                            | : | 231 |
| GmRR33       | : VWSVELH                                                                                                            | : | 252 |
| GmRR34       | :                                                                                                                    | : | -   |
| GmRR35       | :                                                                                                                    | : | -   |
| GmRR36       | :                                                                                                                    | : | -   |
| GmPRR37      | : EVNVTIN                                                                                                            | : | 230 |
| GmPRR38      | : EASIA                                                                                                              | : | 139 |
| GmPRR39      | : EAESGPVDNID                                                                                                        | : | 330 |
| GmPRR40      | : EAESTYMNMQDILQLK                                                                                                   | : | 344 |
| GmPRR41      | : AVEVD                                                                                                              | : | 185 |
| GmPRR42      | : LAQVG                                                                                                              | : | 188 |
| GmPRR43      | : EAESDPVG                                                                                                           | : | 295 |
| GmPRR44      | : EAESTYMNMQDVSQDVHCQVMQTHVQSTCASPIFEAEESTYFVENMQDVPQLESSKLNKIDMVHEKFAKFERKSAKHNDDEKSVITVSEARCDKSFELTDLMLQDCGVAEPETE | : | 330 |
| GmPRR45      | : EAESTYFVENMQDVPQYVHCQVMQTLVQSTCSPIFEAKSTYFVENMQDVPPLKSSKLNKIDMVHEKFAQFERESAENHDEKSVITVSDAARCDKSELTELPEQDCGVAEPETE  | : | 327 |
| GmPRR46      | : LDDGDCQ                                                                                                            | : | 226 |
| GmPRR47      | : LDDGDCQ                                                                                                            | : | 254 |
| GmPRR48      | : LDDGDCH                                                                                                            | : | 243 |
| GmPRR49      | :                                                                                                                    | : | -   |

```

ARR3      : ----- : -
ARR4      : ----- : -
ARR5      : ----- : -
ARR6      : ----- : -
ARR7      : ----- : -
ARR8      : ----- : -
ARR9      : ----- : -
ARR15     : ----- : -
ARR16     : ----- : -
ARR17     : ----- : -
OsRR1     : ----- : -
OsRR2     : ----- : -
OsRR3     : ----- : -
OsRR4     : ----- : -
OsRR5     : ----- : -
OsRR6     : ----- : -
OsRR7     : ----- : -
OsRR8     : ----- : -
OsRR9     : ----- : -
OsRR10    : ----- : -
OsRR11    : ----- : -
OsRR12    : ----- : -
OsRR13    : ----- : -
ARR1      : GGVSQHQGNLNSFMTGQDASFGPL-----STLNGFDLQALAVTGQLPAQSLAQLQAAGLGRPAMVSKSLPVSSIVDERSIFSFNTKTRFGEGLGHGQQPQQQPQMNLLHGVP : 406
ARR2      : GGVSQHQGNMNSFMTGQDQSFGL-----SSLNGFDLQALAVTGQLPPQSLAQLQAAGLGRPTLA-KPGMSVSPVLDQRSIFNFENPKIRFGDGHG-----QTMNNGNLLHGVP : 378
ARR10     : SDDAIQQANRAA----IDSHFMQMSQKGLGGFYHHHRGIPVGSQGFHGGTMMRHYSNRNLGR-LNSLG-----AGMFQP-----VSSSFPRNHNDGGNIL : 329
ARR11     : EKGKELKCYSGGVKNA--DSSPKDV-----EVNSGYQSPG-----RSSYVFSGGNSLIQ--KATEIDPKPLASASLS--DLN-----TDVIMPPK : 326
ARR12     : SGVANQAAMAN----SELHFMQMN--GLDGF--HHRPIPVGSGQYHGGAPAMRSFPPNGILGR-LNTPSGIGVRS--SSPPAGMFLQNO--TDIGKFHHVSSLPLNHSDDGGNIL : 356
ARR13     : VHQRFSMLSDRGKDSMFRQTHIKEP-----YVNYTPTSTSWYETSLNNSRFYSESVH--GHSRLSEAREPVRYNQMSYNYMNR-----NISFENQ : 368
ARR14     : SG-EASQSN-----DSES-----TKRYENIQALVSSGQLHPQTLAA--LFGQPID----- : 300
ARR18     : D-EGQQNMTPDAGFTRDSSYFQMA--QLDGLR-----DFTAARQIPS--SGLLSRSHLTKLQPPMYSSINLQGMNS--SSFIQQGHQNSNSANPFQYHSTLSPRIQNVNLF : 338
ARR19     : SMFNKATNPRRLTWNEQLQPVQSDLV-----QSNFESQFSQSDYSQIMNEDNMFNKAARKPRMTWSEVFPVQSHLV--PTDGLDRDHFDSDITINGNGIQNMEKKQKPKPRKPR : 422
ARR20     : CTP-----QEPQEDFV-----WGN----- : 288
ARR21     : AEQGLYSMLSDRGIDSFRQTHIKEP-----YFNYTPTSTSWYDTRLNNSRFYSPKPVHGFQGSKLLSTTREPVCFNQMPYNYMNSRSTYEPHRIQSGNSLTLPIQSNLSPFPNQ : 396
OsRR21    : AQHHAGIAN--PFCP--PASSGKV-----GSLGGLDFQALAAASGQIPQALAAALQDELLGRPTNSLVLVPRDQSSRLRLAAVKGNKPHGEREIAFGQPIYKQNNAYGAFPPQSSPA : 366
OsRR22    : GAVASQASIVAAFGRDPSFLHIG--AFEGF--QSYQFFAPS-----AALPSFNPHGLLTR-TSAAAFLQELAAAPSSTIQTSTGNVTVGHCHLEE-----NQQANLA : 369
OsRR23    : SAVASQVSIIVAAALGGRDP--FLHMG--GFEGF--QGYQAFQFTSS-----AALSSFTPHGLLNSPRNNPAALGTQGVPAASKS-IQTMSSGHTLSHSINDANKYHLSLP--GNQKGNLG : 375
OsRR24    : STDASQANLAAAFGGRNPAYINMNSFGNYNAYGRYRTVPTAGHTQANNILTRMNSPSAFGVHGLLSQPIQLGHAQN--NLSTSLNDLGG--LNNGNMIRGAQMST-----ILTGPSG : 381
OsRR25    : STQTGMDP--DQFPEKWKYMNELDALKNYCENGRYRTPALASSSSNPFARMNSASALATNGFLPHTHSVQLKNSQR--NMAMGTVGHGGSPGNPVPFQPLQNSSNARKCFPSGSPG : 357
OsRR26    : QKQNEER--ILGAARQ--DFSHKGT--SENLNLRSSF--QEQPSNIANGYPHASQNIQQTANMLDSQLEDTKSTVPLPVP--DKKRTLASDAADSQNVTSASSLGGVLSFKSMP : 354
OsRR27    : RTRFTTWTTSVTSFVRAEYQLKQEGP-----KKIKQLMELDGI FVTKTQVSSHLQKYSRWLENERKKEEATSSSPCNPLSYTNCILDRGYSTWKQSSVITEG : 360
OsRR28    : ----- : -
OsRR29    : ----- : -
OsRR30    : SSEGFDQFRWDSKQYEGPCFWNF----- : 256
OsRR31    : T----- : 277
OsRR32    : AGGAGPSCIPTTTIAG-SRTAAPFQVPVFPVQPPSGT--TVISFSN----TAVQAPIGNAFISFNNAASPAATGNTVIFSNIIAAPAAMQVPAMR--QRLSGGVQPDAPQRLYMGPFPS : 354
OsRR33    : TGGIGSSSVAEAFAGGSSSAAPLQIPVFPVQSSSTGNGNTVIFSNNASPAMRAPTDNTMISFN--VSAAPVANAVIFSNISRSAAQAPAAARGOHLSDGVQQLDFPQQKLYFGPFPS : 392
ARR22     : ----- : -
ARR24     : ----- : -
OsRR41    : ----- : -
OsRR42    : ----- : -
ARR23     : ----- : -
APRR1 / TOC1 : ADGTATSSSLAVTAIEPPLDHLGASHHEPMK-----RNSNPAQFSSAPKK-----SRLKIGESSAFFTYVKSTVLRITNG : 283
APRR3     : -----GSQTGMSSMKKAE----- : 310
APRR5     : -----DAVQMECAKSQFNETRLLANELQ-----SKQAEADFMGASFRRTGR-----RNREESVAQ-YESR-----IELDLSLRR : 409
APRR7     : GRDLEISIRNCDLALPKDEPLSKTTGIMRQD--NSFEKSSSKWKMVKGKGPLDLSSESPSKQMHEDEGSSFKAMSSHLQDNREPEAPNTHLKTLDTNEASVKISEELMHVHESS : 435
APRR9     : -----HNKLMENG--KSVDERDEFKETF-----DVT--MDLIGGIDKRPDS-----IYKDKSRDE-CVG-----PELGLSLKR : 264
APRR2     : RGDSEKEEEGE-----TGDLISEKTD-----SVDIHKKEDETKPKINKSSGKIKVSGNKTSRKK--VDWTPELHKKFVQAVEQLGVDQAI PSRILELMKVGTLTRHNVAASHL : 344
APRR4     : VHFQQH-----FCFYS----- : 292
APRR6     : SYTLPRNESRSIDKTFEYPSNYKYPFKISDLTNNLIVSNLSLWNSLEKKNSASASITQFLFKKPIGEKEETMPKFHIGGKLDLSNHSVHGNVNLKLSMNVNFPVSTISNPNAYNILSID : 398
APRR8     : KNGESSEKSPPELVCMEEELQKWS----- : 270
OsPRR1    : -----GTPEGLLVSTEGGDQASS-----PGVMFSRPIK-----TNLRVAESSAFLAYVKSSTPTTSS : 271
OsPRR37   : GKDLIEGSPRNLNTAYQSSPNERSIKPTDRRE--YPLQNNSEKAAMENLE-ESSVRAADLIGSMANMD-----AQQAARAANAPNCSKVPKDKNRD--NIMPSLESL : 411
OsPRR73   : KYLEIGAPRNSMEYQSSPREMSVNPTEQHEFLMPQSKTTRETDNRNTQNEPTTQVVDLSSIAST-----DKQVVRINNAPDCSSKVPDNDKNRSLIDMTSEELGL : 441
OsPRR59   : KVAGQIMDNALRFADSSSLRSDPGKDLL-----VVAQTADRKCKSSALENN-----AVMEMNLSSENSKGTATGHAESCPSHFVEINL : 369
OsPRR95   : HASNDGNLIPREEDASLRMTCSNDINC-----EKASRDMELVHIIDNQKNN-----THMEMDVARANSRGNDKCFSPAHQLELSLRR : 344
OsPRR10   : TATSIIARAFGREIVNGADLFDHG----- : 327
OsPRR11   : ----- : -
OsPRR12   : ----- : -
GmRR1     : ----- : -
GmRR2     : ----- : -
GmRR3     : ----- : -
GmRR4     : ----- : -
GmRR5     : ----- : -
GmRR6     : ----- : -
GmRR7     : ----- : -
GmRR8     : ----- : -
GmRR9     : ----- : -
GmRR10    : ----- : -
GmRR11    : ----- : -
GmRR12    : ----- : -
GmRR13    : ----- : -
GmRR14    : ----- : -
GmRR15    : ----- : -
GmRR16    : ----- : -
GmRR17    : ----- : -
GmRR18    : ----- : -
GmRR19    : SGVSQHQGNLNSFLPQEQATFGTI-----SSINGIDLQTLAVAGQLPAQSLATLQAAGLGR--STAKAGVPIP-LMDQRNLFSEFNPRLRFEGEQP--QHLSTSKPMNLLHGIP : 376
GmRR20    : SGVSQQQGNLNSFMSSQEQATFGGT-----S-INGIDLQTLAAGQFPQSLSLAKFQAAGLGR--TTAKAGMPMS-LSDQKNLFSFENPRLRFEGESL--QHLNSKPINLLHGIL : 369
GmRR21    : SGVSQHQGNMNSFLSPQEQATFGTI-----SSINGIDLQTLAVAGQLPAQSLATLQAAGLGR--PTGKAGVPM-LMDQRNLFSEFNPRLRFEGEQP--QHLSTSKPMNLLHGIP : 376
GmRR22    : SGVSQQQGNLNSFMSSQEQATFGGT-----S-INGIDLQTLAAGQFPQSLSLAKLQATGLGR--TTAKAGVPM-LSDQKNLFSFENPRLRFEGESL--QHLNSKPINLLHGIP : 369
GmRR23    : QKENDQRSSSSGLKHS--DFPLKDM-----RSFGFQNSVNNQQNDVAIDSNHSDGSLQLQNVETKSHHEADPKGIVSQSTI--AKK-----GRIL : 324
GmRR24    : QKENDQKSSSSGKHS--DSPSKDP-----GSFSILDTAN-KQNDVAIDSFYSYDGLLQ-MDATSHEGNLKGIVSEPTT--EKRRGSTGDI PDKIKSSQKSLNQPFTSVES : 365
GmRR25    : QKENDQKSSSSGKHS--DSPSKDL-----GSFSFLNTAN-KQNDIATDSFYSYDGLLQ-MDATSHEGNLKGIVSEPTT--EKRRASTSEIPDKVQKSSQKSLNQPFTSVES : 326
GmRR26    : SCVANQANMVAALGVADPSYLRMS--SVSGV--GHVQTLGSGQLHN--NNFRSFPFSGI INR-LNTPAGLNVHGF--PSG-VLQLSQSQNLNN-ANDHHKQFQSVIVPVNONG--V : 366
GmRR27    : SCGANRQANMVAALGTADSSYLRLMG--SLSGV--GHLQTLTGPPQFHN--NAFRPFPFGMIGR-LNTPAGLNVHGF--SSSEALQLSHAQNLNNSINDPLKQSSAIACGNQNA--I : 370
GmRR28    : SCVANRQANLVAALGTADSSYLRLMG--SLSGV--GHMQLTGPPQFHN--NAFRPFPFGMIGR-LNASVGLNMHGI--SSSEALQLSHAQNLNNSINDPLKQSSAIACGNQNG--I : 362
GmRR29    : --KAAQANMVAALGSSD-SYLRLMG--SIDGY--GDFCTSSGSGRITN--TTPSYASTGIFSR-LNSPAALNMRAI--SSSALIRPVQSQNINCSLNTLGNIQPSVFPANHSSSLL : 367
GmRR30    : --KAAQANMVAALGSSD-SYLRLIG--SIDGY--GDFCTSSGSGRITN--ATLPSYASTGIFSR-LNSPAALNMRGI--SSSALIRPVQSQNINCSLNTLGNIQPSIFPANQSSSLL : 367
GmRR31    : SCVANQNTNMVVALGGADPSYLRMN--SVSGV--GHIQSISGSGQLHN--NAFRSFPFSGI INR-LNTPAGLNVHGF--PSG-VLQLSQSQNLKN-TNDNLKQSAIVPANONG--V : 360
GmRR32    : --KPTQPSMVAALGSSD-PYLQMD--SVEG--FRTLGSVGMLS--TTLPSYASGGVFCR-LNPPSGL--RGV--N-SALFQVLSQNNMSAKAFGNMQLSMFSANQTSLL : 330
GmRR33    : TG-VAQQQNGMLNTVP--GPIESNL-----GTNGRFDVQALAAAGHVPPETLAAIHAEELGHPTNNIMSTVDQTTLLQASIQGLKSHSHAGHAVYQPLVKCPSNIGKNFSPSILT : 360
GmRR34    : ----- : -
GmRR35    : ----- : -
GmRR36    : ----- : -
GmPRR37   : VSSTLIQRGSTIAIAAAVEEPPDAHASECGP-----DVDGVNDHQTAHFSSGPKK-----SELRIGESSAFFTYVKASILKSNL : 304
GmPRR38   : EYQPDVPG--ISDRRTVAATPRQHPSSS-----RTNDGHFLSGPKK-----SELKIGESSAFFTYVKATTLKRN : 202
GmPRR39   : T--DADPEHFGNG--ISGEAHDNHYVQM-----NSSKEAIDFIGAFHTHTPC-----TLKNSTVN--CTGKFDLSPQLDLSLRR : 398
GmPRR40   : NQDEVLRIELIKSNPEINTDIHRCSDELV-----DPSTGAIDLIAATFKNLPKS-----TDEKCSFSSGNTAKFFDFTQLELSLRR : 419
GmPRR41   : --KAAQANMVAALGSSD-SYLRLMG--SIDGY--GDFCTSSGSGRITN--TTPSYASTGIFSR-LNSPAALNMRAI--SSSALIRPVQSQNINCSLNTLGNIQPSVFPANHSSSLL : 261
GmPRR42   : VKDLAMG--ISLNMQLHLEPLELSSNP-----IVGKGANKMSDSDV-----DMQI IKRK-----SNVCEKG : 241
GmPRR43   : TNDKDDTEHFGNAS-ISGEAHDNHYVQI-----NSSKEAIDFIGAFHTHTPC-----SLKNSTVN--CTGNFDHSPQLDLSLRR : 367
GmPRR44   : NEDEILKSELGRDNSHVS-ILHGCNAEQV-----KPSKGAIDLIAATFGNLPHK-----PNENCSLNGGNTTKFCDETQLELSLRS : 404
GmPRR45   : NEDEILKSELGDGNSHVS-MMQCSAERV-----KPSKGAIDLIAATFGNLPHK-----LDENCSLNGGNTTKFCDETQLELSLRS : 401
GmPRR46   : SEITLVREEV-----ESTPQQRKS-----EITLVKEEVDIVDASKGESVASPHTQKRRKSEKDKNWTPELHKTFFVKAQVEQLGIDQAI PSRILELMKVESLTRHNVAASHL : 326
GmPRR47   : SEITLVREEVDIVDASMGESVASPHTQ-----KRVLSNTDRNTKASNKGVHSDSCEIRGKRKIKVDWTPPELHKTFFVKAQVEQLGIDQAI PSRILELMKVESLTRHNVAASHL : 362
GmPRR48   : PDKTLIKEEDFANGSRGESAVLSLN-----NKKFLSNADGNTSP-NRTGVLNDSF-----MLHKKFVKAQVEQLGIDQAI PSRILELMKVESLTRHNVAASHL : 335
GmPRR49   : -----VDWTP-----ELHKKFVKAQVEQLGIDQAI PSRILELMKVESLTRHNVAASHL : 180

```

```

ARR3      : ----- : -
ARR4      : ----- : -
ARR5      : ----- : -
ARR6      : ----- : -
ARR7      : ----- : -
ARR8      : ----- : -
ARR9      : ----- : -
ARR15     : ----- : -
ARR16     : ----- : -
ARR17     : ----- : -
OsRR1     : ----- : -
OsRR2     : ----- : -
OsRR3     : ----- : -
OsRR4     : ----- : -
OsRR5     : ----- : -
OsRR6     : ----- : -
OsRR7     : ----- : -
OsRR8     : ----- : -
OsRR9     : ----- : -
OsRR10    : ----- : -
OsRR11    : ----- : -
OsRR12    : ----- : -
OsRR13    : ----- : -
ARR1      : TGLQQQLPMGNRM-----SIQQQ--IAAVRAGNSV-----QNNGLMPLAGQQS----LP : 450
ARR2      : TGSHMRL-----RPGQNV-----QSSGMMLPVADQ-----LP : 405
ARR10     : QGLPL---EELQINNN---INR-----AFPSFTSQ-----NSPMVAPSN-LLLLLEGNP : 371
ARR11     : TKKTRIGFDPPIS-----SSAFDS-LLPWNDVPE-----VLESKPVLYESNFLQQ---- : 370
ARR12     : QGLPMPLEFDQLQTNNN---KSRNMNSNKSIAGTSMAPPSFSTQQ-----NSLISAPNNNVVLEGHP : 416
ARR13     : PSQNEETRIVFEPVMA-----NDN--LGRSQN-----NKISQTSQVLGFGQLGPS : 403
ARR14     : -NHHSASFGVWIP-----LGRSQN-----EH----- : 323
ARR18     : QRTSSPLEPLQFPRSKS-----YIGDFKGLGDRAIGGSFLDTCMPFGSS-----STSLPASTNPLMLQANY : 400
ARR19     : MTWTEELHQKFLAIEI-----IGANPKVLVECLQEMRIE : 457
ARR20     : -----AGPDVTLAASKTLLSS : 304
ARR21     : PSQNEERRSFFEPVMA-----NKIAQTSQVLGFGQLGPS : 431
OsRR21    : VGGMPS-FSAWPNNKLG-----MADSTGLGGMNSNSQN-----SNIVLHELQQQPDAMLSGT : 417
OsRR22    : QGLTAAIGQPQLQONWI-----HQEGNGLSDVFSGSSLTNTLSSTLQRPVSSS-----LPPQELLECKQAKVSMPPSI : 437
OsRR23    : QGLATSLGQTQMOKWI-----HEETDDLSTILSGNLSNGMSGTLQSVTSSP-----LLPQELAECTQAKIVSQPSI : 443
OsRR24    : NSFPNISNGAPLAT-----ANRS-----LQPLESS----- : 406
OsRR25    : SSFANISNGLVLDTDDSGSSYAGMFKSMWETSNGSPSCHSGNSSANKSNNGVSAPANQFVQSKFGFSALANQFPVQSNCGFSAPANQYVQVQSNNGGFSVPANQFPVQSNGEFLAPT : 475
OsRR26    : VNQDRKPSETMIL-----ECQAWTGGIPSKQFMQYP-----KHNHERCDLLGDYSCLPKPD : 405
OsRR27    : QQSSSFSGRPIHSMATS-----NGCLTTTDTQAGNYVGVG : 395
OsRR28    : -----LKKKLSKASFTKGSNEDT : 238
OsRR29    : -----LTKDLKASFTTDTSKDE : 241
OsRR30    : ----- : -
OsRR31    : -----V-----PAAFTPDQGMTMNKDKAPMI : 298
OsRR32    : YQGPPPPPTMRNHINIV-----PTAFIPRVGMTVNIKAPMI : 391
OsRR33    : YQGPPPP-SMHNHINLL-----PPTSSP-VTCSMDKGVPII : 427
ARR22     : ----- : -
ARR24     : ----- : -
OsRR41    : ----- : -
OsRR42    : ----- : -
ARR23     : ----- : -
APRR1 / TOC1 : QDPPLVDGNGSLHLHRG-----LAЕКFQVASEGI -NNTK : 317
APRR3     : ---EPGD---LEKN----- : 318
APRR5     : --PNASE--NQSSGD-----RPSLHPSSASAFTRYVHR : 438
APRR7     : KRHRGTKDDGTLVRDD-----RNVLRRSEGSFAFSRYNPA : 469
APRR9     : SCSVSFE--NQDESK-----HQKLSLSDASAFSRFEES : 295
APRR2     : QKFRQHRKNILPKDDHN-----HRWIQSR-----ENHRPNQRNYNVFQQQHR : 386
APRR4     : ----- : -
APRR6     : SSSIDSSSYTGLVSTGLS-----SENSPILYGLPSNDGASNTCT : 437
APRR8     : -----AESFIDLTASVENESQDP : 288
OsPRR1    : FDSELQKGGNRLDSSDH-----RGNFSSTTDRSDTGTVDN : 306
OsPRR37   : KRSRSTGDGANAIQEEQ-----RNVLRRSDLSAFTRYHTT : 446
OsPRR73   : KRLKTTGS-ATEIHDE-----RNILKRSDLSAFTRYHTT : 474
OsPRR59   : EKQHLLNGYTNHKLNE-----KDFNHSNSSFASRYGNK : 403
OsPRR95   : SDYSRLE---SQEKNE-----RRTLNHSTSSPFSLYNCR : 375
OsPRR10   : -----TLIRDSSSTSHDGAQN : 343
OsPRR11   : -----LGTIFDESNYSDNDCSNE : 157
OsPRR12   : -----VKVQSDKGDHNAKISNT : 180
GmRR1     : ----- : -
GmRR2     : ----- : -
GmRR3     : ----- : -
GmRR4     : ----- : -
GmRR5     : ----- : -
GmRR6     : ----- : -
GmRR7     : ----- : -
GmRR8     : ----- : -
GmRR9     : ----- : -
GmRR10    : ----- : -
GmRR11    : ----- : -
GmRR12    : ----- : -
GmRR13    : ----- : -
GmRR14    : ----- : -
GmRR15    : ----- : -
GmRR16    : ----- : -
GmRR17    : ----- : -
GmRR18    : ----- : -
GmRR19    : TNMEPKQLANLHQ-----STQSIGLNMNRVNASAT-----QGNPILMQMAQSQPRGQMLS : 426
GmRR20    : TNMEPKQLANLHQ-----STQPLGSLNMNRVNSPAT-----QNKPLLMQMTQSQPRGQLLS : 419
GmRR21    : TNMEPKQLANLHQ-----STQSIGLNMNRVNASAT-----QGSPLLMQMAQSQPRGQMLS : 426
GmRR22    : TNMEPKQLANLHQ-----STQPLGSLNMNRVNASAT-----QNNPLLMQMAQSQPRGQMLG : 419
GmRR23    : TEENHAVFDCTIP-----TPYTWT-EVPHMQLKE-----EHKS-IVHLEDSFNQLPLHG : 371
GmRR24    : SEANHAVFDCTIP-----TQYSWS-EFPKGPLKE-----EQKT-LVQLEDSLSQLPLHG : 412
GmRR25    : SEANHAVFDCTIP-----TEYSWS-EFPKGPLKE-----EQKT-PVQLEDSLCLPLHG : 373
GmRR26    : QGMTVSVGLDQLQNNKV---VMSVQNLTTVFDKATTFPIPNKLPDRPKITNS-----VSHTSDVHFSNNALMLEPRP : 436
GmRR27    : QGMPMSIGLDQLQHNKGVSVSGPIQNMSPIDARPTFAVSNRLSDQIPKVTMG-----CSPSPVLDVSNNALVLKADS : 444
GmRR28    : QGMPMSIGLDQLQHNKGVSVSGPIQNMSSLIDRPTFGVSKKLSDTQKVTIG-----CSPSPVLDISNNDLVKADS : 434
GmRR29    : QGIPTSIELNQSQSNK---TTGISQLS-QVD-SSGFVAVSGFPDSRATVNG-----PNNSLPCVSNNHIMLQGNP : 433
GmRR30    : QGIPTSIELNQSQRNC---TTGISQLS-QVD-SSGFVAVSGFPDHRATVNG-----PNNSLPCVSNNHIMLQGNP : 433
GmRR31    : HGMTVSVGLDQLQNNKGV---VMSVQNLTTVFDKATTFPIPNKLPDRPKITNS-----GSHTPDVFSNNALMLEPRP : 430
GmRR32    : QGIPTSIDANKFQQ-NR---SPGIRKLS-PLDSSGFKVSSGFSRATVING-----PNNFVHDLNHNHLLQRNS : 396
GmRR33    : VNDTSSGYGAWLS-----SNNTIGLVRPNNSVERVG-----IQNNMLILEHQQRQPQQK : 411
GmRR34    : ----- : -
GmRR35    : ----- : -
GmRR36    : ----- : -
GmPRR37   : EGVVNVDKNGATHVR-----MEVMHQTCQQGV-NDLQ : 336
GmPRR38   : EESAHVDNTTTEVR-----VEDMNQACTEQGG-NDLK : 234
GmPRR39   : SRPSSF---NELTEE-----RHTLMHSNASAFKRYTNR : 429
GmPRR40   : DFPGSS---CKAAFKE-----RQILNHSNASAFSRYSNS : 450
GmPRR41   : KRLRGVEDAGIAIQDD-----RNVLRRSDQSAFSRYNAA : 295
GmPRR42   : -QLEYNGD-KTGTQEN----- : 255
GmPRR43   : SCPGSFE---NKLTEE-----RHTLMHSNASAFKRYTNR : 398
GmPRR44   : DFPGSSGKQASESTEE-----SQRLNHSNTSAFSWYSNS : 438
GmPRR45   : DFPGSSGNQASEATEE-----SQRLNHSNTSAFSWYSNS : 435
GmPRR46   : QKYRMHKKRQILPKEE-----RKWLNLR-----ERSYCVKRPIMAFPPYHS : 366
GmPRR47   : QKYRMHKKRQILPKEE-----RKWSNQR-----ERSYSVQRPIMAFPPYHS : 403
GmPRR48   : QKYRIHKKRQAPREED-----RKWHNQDAM-----QRNYMQRPIMAYPPYHS : 379
GmPRR49   : QKYRIHKKRQAPREED-----RKWHNQDAM-----QRNYMQRPIMAYPPYHS : 224

```

```

ARR3      : ----- : -
ARR4      : ----- : -
ARR5      : ----- : -
ARR6      : ----- : -
ARR7      : ----- : -
ARR8      : ----- : -
ARR9      : ----- : -
ARR15     : ----- : -
ARR16     : ----- : -
ARR17     : ----- : -
OsRR1     : ----- : -
OsRR2     : ----- : -
OsRR3     : ----- : -
OsRR4     : ----- : -
OsRR5     : ----- : -
OsRR6     : ----- : -
OsRR7     : ----- : -
OsRR8     : ----- : -
OsRR9     : ----- : -
OsRR10    : ----- : -
OsRR11    : ----- : -
OsRR12    : ----- : -
OsRR13    : ----- : -
ARR1      : RGPPLMLTSSQSSIRQPMLSNRISERSGFSG---RNNIPES-SRVLPSTYNLTQHSSSS-----MPYNNFQPELNVNSFPLASAPGISVPRKATSYQEEVN : 545
ARR2      : RGGPMLPLSLG---QQPILSSSVRRSDLTGALAVRNSIPETNSRVLPTHS-----VFNNFPADLRSSFPPLASAPGISVPPV---VSYQEEVN : 489
ARR10     : QSSSLP-----SNPGFSPHFEIS-----KRLEHWSNAALSTNIP-----QSDV---HSKPDLEWN-----AFCDASPLVNP : 432
ARR11     : -----QPLPSQSSYVANSAPSLMEEEMK-----PPYETPAGG-----SSVNADEFLLMPQDKIPTVTLLQDLDP : 428
ARR12     : QAT-----PPGF-PGHQIN-----KRLEHWSNAVSSSTHPPPPAHNSNSINH-----QFDVSPPLPHSRPDPLEWNNVSSSYIPFCDASANTLSSPA : 496
ARR13     : AISGHNFNTNMSSYGLTNPQPGTSHFSYGMQSVLNNENATYNPQPANATT-----QPNDLDELPLENLNLYNDLNTSELPHYNISN : 487
ARR14     : -----FSVDVS-----SASNRPVSV-----AVHGLS-----SSAN----- : 348
ARR18     : TQPLHIASDGIQPCIEGTPSNSASPN---ISFQGLSRFPGHWSQGNLNTTRFPSSLPPLNLAFLPD-----QVTCAGNLDGCTSLVSAENPGGEMQCDPQLLGGFMQNVNP : 504
ARR19     : GITRSNVASHLQKHRINLEENQIPQQTQGNWATAYGTLAPSLQGSNDVNTTI-----PSYLMNGPATLNQIQNQYQNGFMTMNNQI : 541
ARR20     : HATPSYLINNQAAPRGSYFMNNIPYPS-----TSCLPVNN-----NCFMTPNSTY---IDQFQHLQQLQQQHQH : 366
ARR21     : AISGHNFNTNMSSYGLTNPQPGTSHFSYGMQSVLNNENATYNPQPANATT-----QPNDLDELPLENLNLYNDLNTSELPHYNISN : 515
OsRR21    : LHSLDVKPSGI VMPQSLSNTFSAEGLSPNQNTLMI PAQSSGFLAAMP PSMKHEPVLATSQP -SSLLGGIDLNVQASTSQPLISAHGGGNSGLVNRNPNVPSQGISSTPHTMNNPY : 534
OsRR22    : RIPSSSALLERTLVSTNLGDSSIS-----QQGALPIDGGFSADRLPLHSSFDGAVATKLDTSLAASQREIGQQKFSVSMVSPSDNLALAKNAKTGASSSGSTIILPLDTAR : 547
OsRR23    : RTSSVSSEHIEGAVGVSSGLLESRSV-----QQSTIPLSG-FSANGLLIHSFNNTCANKLG-----GTSSSCAPARSSNDLMVARDTKGGASSFGGAMLLPPDTEQ : 539
OsRR24    : -----NQHLSRVHSSSADPFSTLVGESPQFDLGRTTNTWTAVPSNIQDRGHNDNMSQATLH-----MNGPKIEPVSSFTSSN-QIPLLNEMQGGQVAVSLANVP : 502
OsRR25    : QFPVQYEVNNQPLVQMNQSSTNHFST-IGNDYQFDLANCSKYWQPTAPSMFDPDLGHNDGTSFRPSQ-----ANIANINQLSSFAASSGQEPMFDELHGQMSPIMSTIS : 580
OsRR26    : --LEHPVGSNLYAPPPLISMSCGMEGDARDFSDVKP---AIMDCIKSLSP-----ALTCTVDSVSVQLSDSVVTSIDGDLKSSGVDG : 483
OsRR27    : AKEIENFISHSRSLGTAIGQESTIEQASLHSEITSVSRDAHENGNSQARGSAMNG-----TSGTRGVLTNENLLHVVSASLPSNMGPQTPQPSQFC : 489
OsRR28    : SNP---SAKNHLTCR-TMTLQPHPYTNQ-----PAETTMQIHSESDV-----EHDDVDYDAMRRALQDGTAFDESKYSDDPFSNE : 307
OsRR29    : SNSRIGPAESHVCRNASTLQPRST-Q-----PTETTMQILSEDA-----EYDDVYAMRRALQYGVIFDESKHSDPSPGDE : 313
OsRR30    : ----- : -
OsRR31    : ELFPGLVDDFLVQTAAGSAGPSIGAPD-----DNDDAAMYAYTSAL-----NNAAVGSLMVPPIES-TFTI IDPIVGTGEG : 373
OsRR32    : ELFPFVDDFLVGETAYGAGPSIGAP-----SNDAAVAYAYTGAL-----NNNTAVGSLMAPPIDEPTFTLTDPIVGTGEG : 465
OsRR33    : ELPYGMVDDFLVSQTTYGAGPSIGAT-----DAAAAYPYTDAP-----SNNVATGCLMVPMPGP-AFSITEPTVVAQEGE : 499
ARR22     : ----- : -
ARR24     : ----- : -
OsRR41    : ----- : -
OsRR42    : ----- : -
ARR23     : ----- : -
APRR1 / TOC1 : QARRATPKSTVLRINGQDPLVNG-NGSHHLHRGAAEFQVVASEGINNTKQAHRSRGTEQYHSQGETLQ-NGASYPHSLERSRTLPTSMESHGRNYQEGNMNI PQVAMNRS-KDSSQ : 432
APRR3     : -----AKYSVQALERNND-----DTLNRSSGNSQ---VESKAPSSNREDLQSLQET--LKKTRDRDYKVGDRS-----VLRHSNLSAFS-----K : 389
APRR5     : PLQTQCSASPV-VTDQRKNVAAS-----QDDNIVLNMNYNTSEPPNAPRRNDTSFYTGADSPGPFPSNLNSWPGQSSYPTPTP INNIQFRDPNTAYTSAMAP--GKDKV : 536
APRR7     : SNANKISGGNLSGSLQDNNSQD-----LIKKTEAAYDCHSNMNEPLHNHRSHVGSNNFDMSSSTENNAFTKPGAPKVSAGSSS--VKHSSFQPLPCDHHNNHAS----- : 569
APRR9     : KSAEKAVVALEESTSGEPKTPTE-----SHEKLRKVTSDQGS-ATTSSNQENIGS-SSVSFR---NQVLQSTVTNKQDQSPIPVE----- : 370
APRR2     : -----PVMAYPVWGLPGVYPPGAIPP-----LWPPPLQSIG-----QPP--PWHKPPYPTVSGNAWCGPVPVPT- : 445
APRR4     : ----- : -
APRR6     : SQMESERISIPQYDPNQCHPHRSILETDVNQIDLDFTSILDSFDPLVDECLMKENRFLPNPTMNLDDTDIDKMDWVSFIENLSHHDINMNHMDWDPSTANYVLPETNMNINFPEKHT : 555
APRR8     : LESVGDVSGPHEIPLSPPESSNNN----- : -
OsPRR1    : IRD-----KEAFEMPVQY-----PVVCFSS--SN-----LHLERSNEGQNDASG-----TPPVYHFFPYYPGMM : 358
OsPRR37   : VASNQGGTGMGSCSLHDNSSE-----AMKTDASAYNMSKNSDAAPI-KQGSNGSSNNNDMGSTTKN-VVTKPSTNKERVMSPSAVKANGHTSAFHPAQHWTSANTT--GKEKT : 551
OsPRR73   : VASNQGGAGPGGSCSPQDNSE-----ALKTDSNCKVKSNSDAEAI-KQGSNGSSNNNDMGSTTKN-AITKPSNNGKVI SPSAVKATQHTSAFHPVQRQTSANV--GKDKV : 579
OsPRR59   : RIESSAQRPFPSPFRVHVQPPVYDKNPQSSRVLLSCEHNTRETVQAVPLDRSTEGAILCSSSVREDAGTSSSSPRKDSLTHPSYGFIPVPI PVGAAIPYHYGAIMQPMYYPQGF : 521
OsPRR95   : -----TASSTINAGDAQACST-----SATHIDLENKNGDSTKPSQDKRETNQPP IRVVVF-----PVPVGLTFDQGPFWNGAPVASLFYQPSAP : 455
OsPRR10   : ELGETNLAFELMAKKGSDVEPRIGG----- : -
OsPRR11   : YKV---GEDEIGGYGCANEANATHSSD-----DHNVVVVDLSCNI-----ADDVSEQEIMSKAT---TCVDHRKQ--DTTRTD : 221
OsPRR12   : AAAE---GSDEKVSQGDGHVVPKAYN-----NVNVEESIGSNNT-----SGEQVSDKIKSDARVGVILVDYDFDEDETKK : 248
GmRR1     : ----- : -
GmRR2     : ----- : -
GmRR3     : ----- : -
GmRR4     : ----- : -
GmRR5     : ----- : -
GmRR6     : ----- : -
GmRR7     : ----- : -
GmRR8     : ----- : -
GmRR9     : ----- : -
GmRR10    : ----- : -
GmRR11    : ----- : -
GmRR12    : ----- : -
GmRR13    : ----- : -
GmRR14    : ----- : -
GmRR15    : ----- : -
GmRR16    : ----- : -
GmRR17    : ----- : -
GmRR18    : ----- : -
GmRR19    : ENTGPRVPRLPSSSLGQPTVSNGISNGLLGRNGIAGN-NRGPAYNPVPPSSSLLS-----FPMNQTSSEMSVNSNFP IGTTPGISSITTK-GSFQEEVT : 516
GmRR20    : ENASSHVTRYPSSLVQPTVPNGISSGVLG-NAIAGTSNITTYNPVQNSLLS-----FPMNQTSSEMSASN-FHLRSTPGITSI PNK-GMFHEEGT : 508
GmRR21    : ENIGPRVPRLPSSSLGQPTVSNGISNGLLGRNGIAGN-NRGPAYNPVPPSSSLLS-----FPMNQTSSEMSVNSNFP IGTTPGISSITTK-GSFQEEVT : 516
GmRR22    : ENAGSHVTRFPSSSLVQPTVSNGISNGLVNG-NGIAGTSNITT-YNPVQNSLLS-----FPMNQTSSEMSASN-FHLRSTPGITSI PNK-GMFHEEGT : 507
GmRR23    : K-QQQHIQVDQSQSVASISSAPLITEE-----NDYANSVS-----SIGNAVGTFPIQPGSLIMN----- : 425
GmRR24    : NGTQHHIHVDQSQSIASINSNPSITEEVAAKLETKPLYAGYEDVSPVPS-----SIGSAVEVFPSSQSKSLMVNDQSSSEPTFTSNL- : 494
GmRR25    : --TQHHIQIDQSQSIASINSNPSITEEVAAKLETKPLYAGYEDVSPVPS-----SIGSAVEAFRSQSKSLMVNDQSSSEPTFTSNL- : 453
GmRR26    : QGSQGSVRI GTLSSSVASQHSFSL-----LLDQGRYSNDWTSAVQPSVIQTNFFPPECFRQTNIPADNMASVPLQGGNLSGSPS-ITSLSRQSHDSMTEMHSEGMTFTNRPG : 545
GmRR27    : ENTQGRGVYENLTS-VASQHSQFSLP-----LLGHGRCSDIWSSPMRSS--GTNSYPPSE-----TLQGGNLSGASSITSLSNQSHDSQTDHMSQGLIFTNNSG : 535
GmRR28    : ENTQGGGVYENLTS-VASQHSQFSLP-----LLDHGRCSDIWSSPMQSS--GTNSYPPSE-----TLQGGNLSGASSITSLFNQSHDSPTDMHSQGLIFTNNSG : 525
GmRR29    : QQMHPGAFRNPQSSVRAASLCAESFDAGLCSNNLLDYNRCNENWQNAQLSKFPAHSLPLCEAFSND-----QLPPTRINVSNSRTHIVN-SPVDFSSRMGIVSVPLEDTRN : 539
GmRR30    : Q-THGPGAFNSQSSVRAASLCAESFDVGLCGSSNLLDHNRCNENWQNAQLSKFPAHSLPLCEAFSND-----QLPPTSINDSNSTHIGNNSPVDFSSRMGIVSVPLEDTRN : 539
GmRR31    : QGTQGSVRIETLSSSVASQHSFSL-----LLDQGRYSNDWTSVQPSVIQTNYSYPPSECFRQTNIPADNMASVPLQGGNLSGAS-ITSLSRQYDSMTDMHSEGTFTNRPG : 539
GmRR32    : PPAQNSGAFRNPQSSVRAASLCAESFDAGLCSNNLLDYNRCNENWQNAQLSKFPAHSLPLCEAFSND-----QLPPTSINDSNSTHIGNNSPVDFSSRMGIVSVPLEDTRN : 497
GmRR33    : QQQQQQKQQQLQQLSLIHDRSCSINVQPSCLVVPSSQSSSETFQAINSPASVNDQCSFAWNAI IDYSLLPQKSNNFSASQFPFGGDTKARGVLYGYTTPSSCSTSSSNGNIQQLQ- : 526
GmRR34    : ----- : -
GmRR35    : ----- : -
GmRR36    : ----- : -
GmPRR37   : IRE---NGEAYESQSQD-----DLPSSTSIPDS-----LSIERSTPPASMEVSQKHYREENLHQGMHPRNGTHCSE : 402
GmPRR38   : THE---NEEMFENHSQD-----DLPSNSIPDS-----FSIERSTPPASTEG-----VVHPRNGSHGSG : 286
GmPRR39   : QLQISTPAVLINFDQQRQIAN-----CEKNISRIATGNSDSSSTPSMQRQIVSPTTVQSK-----EPELATSHSQPHSLPIPVKGVRFNDLCTTYGVSFVPSVFRAGSGS : 531
GmPRR40   : KLLQPLFPPTSTISAKLTNASQN-----SHESLKLKSKNTSTSHQYSEKSNQEEKIITSVIG---QSGQVDPKLPNSQLGLFPATGVTSDHKSNGNVPFVPSKLYAKSGV : 552
GmPRR41   : LNPKKSPTGCVGNSP-HNNSLE-----VTKK-DSSHDIQSHSSGNPP-NQNSNGASNNIDMGSTTNN-AYAKSAVISEPAVASTTKYTTATMLAPPKLDHRKDSAAPDFHLHCEN : 402
GmPRR42   : QAMN-AQTGNVGSCLDNDSSA-----APNTEMTMHPFSSHNGTTPS-NQKSNNGSNNINDRASTNTY-LGTPDPTFDKPESGRIGS-----YNSCELLTEALNKD--SKS-S : 352
GmPRR43   : QLQISMPAVLINFSDQQRQITN-----CEKNISRIATGNSDSSSTP-MQRCLVSPPTTVQSK-----ESELATSHPPQGHSLPIPVKGVRFNDLCTTYGVSFVPSVFRAGSGV : 499
GmPRR44   : KLLQPLFPSPSITSPKVNWNLD-----SHECLKLS---GNCQYDSSNQNLN-MISTVIG---QY-----GLLPVSGVSKLSEGHGHVFTSVFYAQSGI : 523
GmPRR45   : KLLQPHFSTPSTPPEVNNLSWD-----SHESHKLSGITSGNQYGGSNQNLN-MIGTVIC---QYQVTPKLSNSQCGLLPVSGVSNLSEGHGNVFTSLFYAQSGI : 536
GmPRR46   : NHTLPLPPVYPMWGQSGSPTAGMQ-----IWGSPGYFW-----HTTAENWHWKP-FPGMHADAWGCPVLPPLPP : 430
GmPRR47   : NHTHPLPPVYPMWGQSGGPMAGMQ-----IWGSPGYPLW-----QPTAENWRWKP-FPGMHADAWGCPVLPPLPP : 466
GmPRR48   : NHTLSPAPIYPMWGQSGSPTAGVQ-----IWGHPGYHIW-----HPT-ESCHWKP-YQGVHVDWAGCPVLPPLPP : 441
GmPRR49   : HHTLSPAPIYPMWGQSGSPTAGVQ-----IWGHPGYPMW-----HPT-ESHWKP-YQGVHVDWAGCPVLPPLPP : 286

```



```

ARR3      : ----- : -
ARR4      : ----- : -
ARR5      : ----- : -
ARR6      : ----- : -
ARR7      : ----- : -
ARR8      : ----- : -
ARR9      : ----- : -
ARR15     : ----- : -
ARR16     : ----- : -
ARR17     : ----- : -
OsRR1     : ----- : -
OsRR2     : ----- : -
OsRR3     : ----- : -
OsRR4     : ----- : -
OsRR5     : ----- : -
OsRR6     : ----- : -
OsRR7     : ----- : -
OsRR8     : ----- : -
OsRR9     : ----- : -
OsRR10    : ----- : -
OsRR11    : ----- : -
OsRR12    : ----- : -
OsRR13    : ----- : -
ARR1      : SS-----EAGFTTPSYDMF-----TTRQNDWDLRNIGIAFDSDHSE---SAAFSASEAYSS--SSSRHNTTVAAT-----EHGRNHQPPS----- : 618
ARR2      : SSDAKGSSAATAGFGNPSYDIFNDFPQHQQHNKNI SNKLNWDLRNMGLVSSNQDAATATATAAFSTSEAYSS--SSTQRKRRETDATVVG-----EHGQNLQSPSR----- : 591
ARR10     : -----LDT--NPASLCRNTGFG-----STNAAQTDFFYPLQMN-----QQPANN----- : 469
ARR11     : -----AMKLEFNTAILR-----SLNWELPESHHSVSLDLDLTLWLQGERFL--ANTGLQFQDYS----- : 483
ARR12     : -----LDTTNPRAFCRNTDFD-----SNTNVQPGVVFY----- : 523
ARR13     : FQ-----SDDNKKQG-----EEDGDWTFVNIQDQNGESS----- : 518
ARR14     : -----FRQRGDVNN-----NRIRQG----- : 363
ARR18     : LG-----GQKWEQONCTMLNPFNG-----IEYPLPADNMVFRDNNSTR-----SKGL----- : 547
ARR19     : IT-----NPPP-----PLPYLDHHHQQHQHS----- : 562
ARR20     : YQ-----STLN-----SISAMLTQESRHVP----- : 387
ARR21     : FQ-----FDDNKHQGEADPTKFEPAKFSTELNHEDDGDWTFVNIQDQNGETS----- : 567
OsRR21    : LV-----SPNSMGMSKQPPGVLTENSALNHSYGLGGSNPPMDSGLLSSQSKNTQFGLLQDDITGS----- : 599
OsRR22    : HS-----DYLQFGGASNSLQKMDGQKQDHIQSSNI IWSSMPSTQLPSDTQIHNTQNRQLDGSFN--HNI GAHLADQTNAS--ASIL----- : 625
OsRR23    : K-----YLNFGGGNGLKQKFDRTADSLFDLKFVWSSVPSQLASNI GAHHAMSQRWNNSSNSNI GARMIGQATSSGSTVI----- : 617
OsRR24    : IA-----FNQDTPFPNYGSSNTRDMLNN-----SHVFSNSSINTSLPMLS-----LDNPAV----- : 549
OsRR25    : LSD-----FDDQMGSPNIGNDTSPAEMMHDNFSLGSDSNISSTPTDSSFGSTFPDFH-----LDSPEM----- : 639
OsRR26    : L-----PSIKDCCLDQNSQGLRPSQEPSI IGSTELASLPEDLPSYPLHGVSL--NIGLSSIDL----- : 543
OsRR27    : TN-----ELAANYSII SDQNPGTSHPTSSAI NNQNSKTQEMSVSQTVELGCGNDVMLDWPVLV----- : 549
OsRR28    : D-----EDVVG---DGYADKANADSSGDHYQAVVLTTPHNVDYVTEIMNKVTS----- : 355
OsRR29    : D-----EQVVVGGDQGCANEANDIDSSGDHQQVAAVVTKPCNANASQEI INKMTNS----- : 365
OsRR30    : ----- : -
OsRR31    : S-----VPVVVSEDQNNVAVAI EATAPNNAELFMPEQVAVDAPVDVEEGIMFSLSL----- : 427
OsRR32    : V-----VHIVITSEDQN--ALAAVEAGAPNNAEPFMMPDQ-----VDLEEDIMFSLSL----- : 512
OsRR33    : TG-----TGVDAGTSEKN---AIVEA---PNNPAPLMVLDQVAADAAMDVQEDIMFSLSL----- : 549
ARR22     : ----- : -
ARR24     : ----- : -
OsRR41    : ----- : -
OsRR42    : ----- : -
ARR23     : ----- : -
APRR1 / TOC1 : VDGSGFSAPNAYPYMHG-----VMNQVMMQSA-----MMPQYGHQI PHCQPNHPNGMTGYPYHHPMNTSLQHSQMSLQNGQ----- : 506
APRR3     : YNNGATSAKKAP-----ENVECSPHDSPIAK-----LLGSSSSSDNPLKQSSGSD----- : 437
APRR5     : DEGIANGVNVGHPVDVQNSFMQHVVHVVYVHVMTQQQQPSIERGSSDAQCGSSNVFDPPI EG---HAANYSVNGSFGHNGNNGQRGPSTAPNVGRPNMETVNG----- : 590
APRR7     : YNLVHVAERKLP-----PQCGSSNVNETIEG---NNNTVNYSVNGSVSGSGHGSNGPYGSSNGMAGMMGSDNGA----- : 640
APRR9     : -----SNREKAASKEVEA---GSQSTNEGIAGQSSSTEKPKEE----- : 405
APRR2     : -----GSYITPS-----NTTAGGFQYPNGAETGFKIMPAS---QPDEEMLDQV----- : 485
APRR4     : ----- : -
APRR6     : NEIGWVSSQVGYVPFEN-----MIPSEVDINHMGYSGSIPPQEE TNTNNVGFVSCIEHSE IPPKTNMAI LETNYSNPLDWFVPEDITSLETNTIQK : 649
APRR8     : ----- : -
OsPRR1    : DHG---MTHPPVQNFQ-----NINNAQVHTPQT---LLPQYNV--YPQCHG---VSMMPFQYN--PAGMSIQSNQLPT----- : 420
OsPRR37   : DEVANNAAKRAQPEVQSNLVQHPRPILHYVHFVDSREN---GGSGAPQCGSSNVFDPPI EG---HAANYSVNGSFGHNGNNGQRGPSTAPNVGRPNMETVNG----- : 650
OsPRR73   : DEGIANGVNVGHPVDVQNSFMQHVVHVVYVHVMTQQQQPSIERGSSDAQCGSSNVFDPPI EG---HAANYSVNGSFGHNGNNGQRGPSTAPNVGRPNMETVNG----- : 683
OsPRR59   : MHCDSAAINKTAIQHVC---QSNYHENLKGPPQIDEHKQPEENHQLHHSRQILRESGPEVDLAKAHMERINQSASCSQDIRKGSCTGSGETDA : 613
OsPRR95   : PIWNSKTSTWQDATT--Q-----AISLQONGPKDTDTKQVENVEEQ TARSHLSANRKHRLIEIPTDEPRHVSPPTGESGSSVTLDSARKTLGSGVCD : 545
OsPRR10   : ----- : -
OsPRR11   : G-----PAAMS-----ADEANATFSTGNLQQVNVIVT--CNGDGSQESI QKNT--C----- : 263
OsPRR12   : P-----TST----- : 252
GmRR1     : ----- : -
GmRR2     : ----- : -
GmRR3     : ----- : -
GmRR4     : ----- : -
GmRR5     : ----- : -
GmRR6     : ----- : -
GmRR7     : ----- : -
GmRR8     : ----- : -
GmRR9     : ----- : -
GmRR10    : ----- : -
GmRR11    : ----- : -
GmRR12    : ----- : -
GmRR13    : ----- : -
GmRR14    : ----- : -
GmRR15    : ----- : -
GmRR16    : ----- : -
GmRR17    : ----- : -
GmRR18    : ----- : -
GmRR19    : SG-----IKGSSGFPS--YDIFNELH-----HQKSHDLEITNPGLTYNASHHVNPLQGNIDVAPSVLVHQGFSSTQQTGQSRDGLIGKAMFMSGEGLEQNNLQN----- : 609
GmRR20    : SG-----VKGSGGFVQ--YDMFNELH-----HQKSHDWDLTNTGMTYDASQHANPLQGNIDVSPSVLVHQGFSSTQQTGQSRDGLIGKAMFMSGEGLEQNNLQN----- : 602
GmRR21    : SG-----IKGSSGFPS--YDIFNELH-----HQKPHDWEITNPGLTYNASHHVNPLQGNIDVTPSVLVHQGFSSTQQTGQSRDGLIGKAMFMSGEGLEQNNLQN----- : 609
GmRR22    : SG-----IKGSGGFVQ--YDMFNELH-----HQKSHDWDLTNTGMTYDAAHANPLQGNIDVSPSVLVHQGFSSTQQTGQSRDGLIGKAMFMSGEGLEQNNLQN----- : 601
GmRR23    : -----VAFLIKFKATKATFWEDLHFYWLQGEQYNNMNFSLQNGMS----- : 466
GmRR24    : -----SLKAQGFNRDCISDLDFYQRNLLGGEVASAPLEEDLNFLLQTECYN--MNFGLQNDMS----- : 553
GmRR25    : -----SLKTQGFNLDICSDLDFYQRNLLGGEVASAPLEEDLNFLLQTECYN--MNFGLQNDMS----- : 512
GmRR26    : -----HTSSNVFPQGW---DHNQDATHHSNII-----NLDNF-----YCDPLQM----- : 582
GmRR27    : -----QISNNVPFLGW---DHNHDSYHSNVIG---NSIDLIDPEGHTSINSTYRNLDFN-----FCDFLQM----- : 594
GmRR28    : -----QMSNNVPFQGW---DNNHDSYDANVIG---NSIDLIDPEGHTSINSTYRNLDFN-----FCDFLQM----- : 584
GmRR29    : ELACQEG-----LIGNIVKPSSTYTPQRWEHKLQYVNVGHSFNPVNSHASSGKSSMGHGLNQNNTICSNRVDAS--LVGQLNGASPSIS----- : 625
GmRR30    : ELRCQEG-----LIGNIVQPSSTYTPQRWEHKLQYVNVGHSFNPVNSHASSGKSSMGHGLNQNNTICSNRVDAS--LVGQLNGASPSIS----- : 626
GmRR31    : -----HISSNVYQGW---DNNQDATHHSNII INSLTPVNGAAMPAGHAAMNSALHRNLDFN-----YCDPLQM----- : 602
GmRR32    : -----DKRGCNKDMSQTFNSTKS--VSPNGDTSSLGHSLDQNNVSSEGIGAS---LVN--PSIT----- : 550
GmRR33    : -----STLTFGAARPLPPLLPMTRKDPYGFKSGDLDQVCFRNLGFVGDSCIPSR--FVENEIESS----- : 587
GmRR34    : ----- : -
GmRR35    : ----- : -
GmRR36    : ----- : -
GmPRR37   : LEVSGMASQVYPIYISG-----VVNHVMPSSAQISA--MISQYSH--LPQGGP--HGTGMTSFPY--PMSICLQPGQIPN----- : 472
GmPRR38   : -----PAQHAYPIYISG-----VVNHVMPSSAQILHAGSSMIAQYNH--LPQCPP--HANGMTSFPY--PMSICLQPGQIS----- : 352
GmPRR39   : PAMPSPNSVMLLEPNFQV---NAFYQSNMKESSSEQLYEPGGPNGNTTQNHIVYVTEHKSSENAEDQGHISPTTDQSVSSSFCNGNASHLNSIGYG : 623
GmPRR40   : HPISPKSVCQKE-----SSFPPTSTSSQSNPQSHNSERHHWLEDATHASDQNVNDQSNLECEHDSPAASQAGPSPFFHDTANHNSSGVYR : 639
GmPRR41   : HNCIADNMKQHP-----PDHDAESIKKMTAAPHFEGNVGNHSINRSAGSNGSNGQNGSSSTAVNAGGTNMSNN----- : 474
GmPRR42   : TLTISFTIIITLPLKLS-----TPQCVSSNAFQGAES---NAANYVDGNAVESDHGSNNGQDGSNNLTIRTINVENGNV----- : 426
GmPRR43   : PAMPSPNSVMLLEPNFQV---NAFYQSNMKESSSEQLYEPGGPNGNTTQNHIVYVTEHKSSENAEDQGHISPTTDQSVSSSFCNGNASHLNSIGYG : 591
GmPRR44   : HPMLSPKPVQNE-----SSFPPTSTSSQSNPESHCSQPHDCSNDATCLDQNVKNDTSDHARHESPAADQAGNLCDAANHVNSAYG : 610
GmPRR45   : HPMLSPKPVQNE-----SSFPPTSTSSQSNPESHCSQPHDCSNDATCLDQNVKNDTSDHARHESPAADQAGNLCDAANHVNSAYG : 623
GmPRR46   : -----QTPGFYPSQIFFIKSNMPSLNADAVDHTFTMPQSSFEHYLAEVVDKV----- : 480
GmPRR47   : -----QAPGFY-----SQNMPALLNADADHTFTMPQSSFEHYLAEVVDKV----- : 509
GmPRR48   : -----APCFY-----NQNTPLHNPKAVDYRFGMPQSSFEHYLAEVVDKV----- : 483
GmPRR49   : -----APCFY-----NQNTPLHNPKAVDYRFGMPQSSFEHYLAEVVDKV----- : 328

```

```

ARR3      : ----- : -
ARR4      : ----- : -
ARR5      : ----- : -
ARR6      : ----- : -
ARR7      : ----- : -
ARR8      : ----- : -
ARR9      : ----- : -
ARR15     : ----- : -
ARR16     : ----- : -
ARR17     : ----- : -
OsRR1     : ----- : -
OsRR2     : ----- : -
OsRR3     : ----- : -
OsRR4     : ----- : -
OsRR5     : ----- : -
OsRR6     : ----- : -
OsRR7     : ----- : -
OsRR8     : ----- : -
OsRR9     : ----- : -
OsRR10    : ----- : -
OsRR11    : ----- : -
OsRR12    : ----- : -
OsRR13    : ----- : -
ARR1      : -----GMVQHQQVYADGNGGSRVKSERVATDT---ATMAFHEQYSNQEDLMSALLKQ-V----- : 669
ARR2      : -----NLYHLNHVFMDDG--GSVRVKSERVAETVTCPPANTLFHEQY-NQEDLMSAFLKQ-EGIPSVDFNEFEFDGYSIDNIQV--- : 664
ARR10     : -----SGPVTAEQ-LFRSSNPNEGLLMGQKQKQSG-LMASDAGSLDDIVNSLMTQEQQSQ-SDFSEGWDLDGLAHSEHAYEKLHFPFSLSA--- : 552
ARR11     : -----S-SPSLLS-----ELPAHLNHWYGNRLEPDPDEYSFMVDQGLFIS----- : 521
ARR12     : -----GPSTDAMALLSSSNPKEGFVVGQKQKQSGGFMVADAGSLDDIVNSTMKQEQQSQ-GDLSGGDLGYGGFSSLRCTI--- : 596
ARR13     : -----NTIATPETNTPNFNINPNQNGQAVPEFTDWSFLDQPPRLGIRIGYFGFKFSGLEV----- : 575
ARR14     : -----Y-----GSNVNEES-----WILERS-SRQR----- : 382
ARR18     : -----DESLMNPIDNSQYEVGKATMLDPEMKSGKPENDNQHDVFDIMNEMMKQEENGMVVPATRFGDFSFPFP--- : 618
ARR19     : -----SPQFNLYMNEELLQASGLSATDLELTYPSLPPYDPEYLINGNYN----- : 608
ARR20     : -----S--SAMENSEPLMIYNSNLPFGIDECFFPAGFN---IFDQIGHN----- : 426
ARR21     : -----NTIASPETNTPILNINHNQNGQDVEFNDWSFLD--PQEL-VDDDFMNSLFNNDMN----- : 621
OsRR21    : -----WSPLPNVDSYGNVGLSHPGSSSSSFQSSNVALGKLPDQGRGNHGFVKGTCIPSRFAVDEIESPTNLSHSIGSSGDI MSPDIFGFSGQM----- : 691
OsRR22    : -----PQMKFDTRISEEKMKQKNTYDLGSSKLQGG--FNSSGCFDGLLNSIKVEKDD-LPFMDNELGC-DLFLGACI----- : 696
OsRR23    : -----PQMKTDFLVSGDMAMPKNASDLSIPKLQSE--LSSSSCFDGLLNSIVKVEKDD-VTFSD-DLGCDFYSLGACI----- : 688
OsRR24    : -----PRQTLDRGN-TGIVSPMQDGRHHQAVSNQNLNNDLMTTGLQRLGSLGGLDDIVVDMFRPDREDDGVPYIDGDWELV----- : 626
OsRR25    : -----PAQMLNGGDEGILLPVLDDTVDDQDLFDQDENNGREK-LGSGRCVRKGFPEFCFF----- : 694
OsRR26    : -----NYS DAMILS-----GLQSNWYDLEFS-SEMMDYP-SIDECLFASS----- : 582
OsRR27    : -----LEDQLDNDVLMNSFFDGLDQLQGVVTAIDGTQEMLAFDSTGDLGVSPPRGLNNEIASHENTNGKNGASSGP----- : 620
OsRR28    : -----DDVQVTRGKAT-----VSRLVDYSDSDS----- : 380
OsRR29    : -----DGMQATKGSKAA-----VFRLVDYSESDS----- : 390
OsRR30    : ----- : -
OsRR31    : -----LGLDEDMI PMED-----AGGEATDDSLNIKEGGMEIGWDLDDLDYILMNTNEFAPLDDMAWIE----- : 485
OsRR32    : -----LGLDEDMI PMED-----AGGEAAEGSLNIGEGGMEIGWDLDDLDYILMNTNEFAPLDDLAWIE----- : 570
OsRR33    : -----LGPDYDLLPMEDV SAPDTAAAGDAAGGSLDGEEGMDIGWDLDDLDYILVENVDFAPLDDLAWIE----- : 614
ARR22     : ----- : -
ARR24     : ----- : -
OsRR41    : ----- : -
OsRR42    : ----- : -
ARR23     : ----- : -
APRR1 / TOC1 : -----MSMVHHSWSPAGNPPSNEVRVN---KLDREAEALLKFRKRNRQRCFDKIRYVNRKRLAERRPRVKGQFVRKMNGVNDLNGQPDADYDD-----EEEE : 598
APRR3     : -----RWAQREAAALMKFRLKRKRCFEKKVRYHSRKKLAEQRPHVKQFIRKRDD-----HK : 489
APRR5     : -----NHIDQLIEKKNEDGYSLSVG-KIQQSLQREAAALTKFRMKRDRCEYKRVYERKRLAEQRPRIRGQFVRQVQSTQA-----P : 667
APRR7     : -----GKNGNGDGS GSGSGSGSNLADEN---KISQREAAALTKFRQKRKRCFRKRVYQSRKKLAEQRPRVKGQFVRKTA-----AT : 716
APRR9     : -----ESAKQRWSRS-----QREAAALMKFRLKRKRCFEKKVRYQSRKKLAEQRPRVKGQFVRVTVNSDAS-----TK : 467
APRR2     : -----VKEAISKPWLPLPLGLKPPSAESVLAELTRQGISAVPSSSCLINGSHRLR----- : 535
APRR4     : ----- : -
APRR6     : -----SLVSCETS YDALDNMVPLETNMEEMDALYDISIEDLISFDIDANEKIDIFSWLEDNGFSEENMMSECEYHNIESVNSQSDMKIDDNFDDYRECDWINEEMNKDV----- : 755
APRR8     : -----VAAQLQMP THEALDEEVMQDGLSLSLEVDLQEGHGSNKELFDKIFTDLAKELKP----- : 367
OsPRR1    : -----QNMWPQASSTPMPEETCS---RSERRAAALAKFRLKRKRCFEKKVRYVNRKRLAETPRVKGQFVRQANYTIDITSTGDDISEDED-----D : 504
OsPRR37   : -----TINKSGPGGNGSGSGSGNDMYLKRFTQREHRAVAVIKFRQKRKERNFGKRVYQSRKRLAEQRPRVKGQFVRQAVQ-----DQ : 730
OsPRR73   : -----IVDENGAGGNGSGSGSGNDLYQN---GVCYREAAALNKFRQKRKRVNFGKRVYQSRKRLAEQRPRVKGQFVRQAVQ-----EDQ : 760
OsPRR59   : N-----TNTVIALESNGESGQNCNNVLDGDRSRREAAALTKFRMKRDRCEYKRVYHSRKKLAEQRPRVKGQFVRSQKLSAI-----TT : 694
OsPRR95   : S-----SSNHMIAPTESSNVVPEPNPDLRHLRSQREAAALNKFRMKRDRCEYKRVYQSRKRLAEQRPRVKGQFVRQDHGVQ-----S : 623
OsPRR10   : ----- : -
OsPRR11   : -----DDQHAPTGSKPE-----TFRLVNYSDSESD----- : 288
OsPRR12   : ----- : -
GmRR1     : ----- : -
GmRR2     : ----- : -
GmRR3     : ----- : -
GmRR4     : ----- : -
GmRR5     : ----- : -
GmRR6     : ----- : -
GmRR7     : ----- : -
GmRR8     : ----- : -
GmRR9     : ----- : -
GmRR10    : ----- : -
GmRR11    : ----- : -
GmRR12    : ----- : -
GmRR13    : ----- : -
GmRR14    : ----- : -
GmRR15    : ----- : -
GmRR16    : ----- : -
GmRR17    : ----- : -
GmRR18    : ----- : -
GmRR19    : -----A--NFNPLLVDN---SIRIKAERIPDAS--SQTN-LFPEHY-GQEDLMTALLKQEQEGMGAENEFDFDGYSLDNI PV----- : 677
GmRR20    : -----IGQHNNLLLDN---SVRKAERIPDPS--CQINNLFSDQY-GQEDLVS AFLKQEQEGVGTAEENEFDFDGYSLDNI PV----- : 673
GmRR21    : -----ASQNLNSLLLDN---SIRVKAERIPDAS--SQTN-LFPEHY-GQEDLMSALLKQEQEGMGAENEFDFDGYSLDNI PV----- : 679
GmRR22    : -----VGQHNNLLLDN---SVRKAERIPDPS--CQINNLFADQY-GQEDLVS AFLKQEQESIGTSENEFDFDGYSLDNI PV----- : 672
GmRR23    : -----EYYPGLIS-----EAPTHL-----YDSADYS-VIDQGLFIA----- : 497
GmRR24    : -----EYYPRLIA-----EVP SHF-----YDSADYS-SVDQSLFIA----- : 584
GmRR25    : -----EYYPRLTA-----EVP SHF-----YDSADYS-SVDQSLFIA----- : 543
GmRR26    : -----KHEGFVELTDETLKQHQGNTMDQKQSQEN-HFSNNLGSLEDLVSSMMK----- : 630
GmRR27    : -----KHDGIMGLSDENSLKQHQHRYIMNQKQSQNS-RAPNNIGSLEDFVSSMMKQKQDK-VKFLDGSYLCNNNYPDGTSM----- : 667
GmRR28    : -----KHDGIMGLSEENSLKQYGYIMNRQKQNS-SATNNLGSLEDFASSMMKQATYS-VWRAC----- : 642
GmRR29    : -----RCTEVEKFSSDIRLKPNEAYILEQMKSQDG-FMQNTFGTLDLIMGAMVKREQNE-LTLLDGE MGFDAYPVGSN----- : 697
GmRR30    : -----RCTEVEKFSSDIRLKPNEAYILEQMKSQDG-FMQNTFGTLDLIMGAMVKREQNE-STLLDGE MGFDAYPVGSN----- : 698
GmRR31    : -----KHEGFVELTDEALSKHQGNIMNLPKQSQS-HFSNNLGSLEDLVSSMMKQENDK-MKLLDGNLICNN-YSGGLSRCDSRFSSTFQIMHPR----- : 690
GmRR32    : -----QSNEGEKFYS---MKSNDACILRSMESQEG-LMQNTFGSLNDIMSEITEQE QNT-IMLMDGELEFDLDHAFDSF----- : 619
GmRR33    : -----VSDF TQMK-----VNVDISGNRQKEEPNIPKVSHPITERYPSRDHSSVFAE----- : 633
GmRR34    : ----- : -
GmRR35    : ----- : -
GmRR36    : ----- : -
GmPRR37   : -----PHSWQSPGNSSSSEAKLS---KVDREAAALMKFRQKRKRCFEKKVRYVNRKRLAERRPRVKGQFVRKLGANADLNGQPASIDYD-----EDDE : 559
GmPRR38   : -----TNSWPSLGSSSSCEVKIS---KVDREAAALVKFRQKRKRCFEKKVRYVNRKRLAERRPRVKGQFVRKLGANADLNGQPASTDYD-----EDDE : 439
GmPRR39   : S-----NCGSSSNVDQVNTVWAASEGKHDLTNSNANSHRSIQREAAALNKFRMKRDRCEYKRVYERKRLAEQRPRVKGQFVRQVHPDPL-----VA : 711
GmPRR40   : -----SDGNATSAKVAKESHEIFIDSGQRSYDGFIGTDSHRTS QREAAALTKFRMKRDRCEYKRVYERKRLAEQRPRVKGQFVRQVHPDPL-----VA : 729
GmPRR41   : -----GLTGN-SGSGDASGSVSANRVDQN---KTSQREAAALTKFRQKRKE---RRERC FHKKVFEK---QIHGAFLTFVVF-----FM : 543
GmPRR42   : -----AAGSIGGIDRKSIGNGTDEVRL---ALREAAALTKFRMKRDRCEYKRVYERKRLAEQRPRIRGQFVRRIVYGLKAKKKKINKVTTWCLGTILSTFLNNT----- : 526
GmPRR43   : S-----NCGSSSNVDQVNTVWAASEGKHDLTNSNANSHRSIQREAAALNKFRMKRDRCEYKRVYERKRLAEQRPRVKGQFVRQVHPDPL-----VA : 679
GmPRR44   : S-----SMDSGNDGHATSAIVSKNTSDGFSGCHNYDGRFVTDHRSRQREAAALVKFRMKRDRCEYKRVYQSRKRLAEQRPRVKGQFVR---QHNHP-----FA : 703
GmPRR45   : S-----SMDSGNDGNATSAIVSKNAPDGFSDGCHNYDGRFVTDHRSRQREAAALVKFRMKRDRCEYKRVYQSRKRLAEQRPRVKGQFVR---QHDHP-----VA : 716
GmPRR46   : -----VKEAISKPWLPLPLGLKPPSPDSVLAELSRQGISNIPKGSNSC----- : 524
GmPRR47   : -----VKEAINKPWLPLPLGLKPPSTESVLAELSRQGISNIPKGSNSC----- : 553
GmPRR48   : -----VKEAISKPWLPLPLGLKPPSMDSVLAELSKQGISIPLGNKRSTPKLR----- : 532
GmPRR49   : -----VKEAMSPWLPLPLGLKPPSMDSVLAELSKQGISIPLGNKGSSTPKPRRDVPTPPPGPT----- : 389

```

|              |   |                         |   |     |
|--------------|---|-------------------------|---|-----|
| ARR3         | : | -----                   | : | -   |
| ARR4         | : | -----                   | : | -   |
| ARR5         | : | -----                   | : | -   |
| ARR6         | : | -----                   | : | -   |
| ARR7         | : | -----                   | : | -   |
| ARR8         | : | -----                   | : | -   |
| ARR9         | : | -----                   | : | -   |
| ARR15        | : | -----                   | : | -   |
| ARR16        | : | -----                   | : | -   |
| ARR17        | : | -----                   | : | -   |
| OsRR1        | : | -----                   | : | -   |
| OsRR2        | : | -----                   | : | -   |
| OsRR3        | : | -----                   | : | -   |
| OsRR4        | : | -----                   | : | -   |
| OsRR5        | : | -----                   | : | -   |
| OsRR6        | : | -----                   | : | -   |
| OsRR7        | : | -----                   | : | -   |
| OsRR8        | : | -----                   | : | -   |
| OsRR9        | : | -----                   | : | -   |
| OsRR10       | : | -----                   | : | -   |
| OsRR11       | : | -----                   | : | -   |
| OsRR12       | : | -----                   | : | -   |
| OsRR13       | : | -----                   | : | -   |
| ARR1         | : | -----                   | : | -   |
| ARR2         | : | -----                   | : | -   |
| ARR10        | : | -----                   | : | -   |
| ARR11        | : | -----                   | : | -   |
| ARR12        | : | -----                   | : | -   |
| ARR13        | : | -----                   | : | -   |
| ARR14        | : | -----                   | : | -   |
| ARR18        | : | -----                   | : | -   |
| ARR19        | : | -----                   | : | -   |
| ARR20        | : | -----                   | : | -   |
| ARR21        | : | -----                   | : | -   |
| OsRR21       | : | -----                   | : | -   |
| OsRR22       | : | -----                   | : | -   |
| OsRR23       | : | -----                   | : | -   |
| OsRR24       | : | -----                   | : | -   |
| OsRR25       | : | -----                   | : | -   |
| OsRR26       | : | -----                   | : | -   |
| OsRR27       | : | -----                   | : | -   |
| OsRR28       | : | -----                   | : | -   |
| OsRR29       | : | -----                   | : | -   |
| OsRR30       | : | -----                   | : | -   |
| OsRR31       | : | -----                   | : | -   |
| OsRR32       | : | -----                   | : | -   |
| OsRR33       | : | -----                   | : | -   |
| ARR22        | : | -----                   | : | -   |
| ARR24        | : | -----                   | : | -   |
| OsRR41       | : | -----                   | : | -   |
| OsRR42       | : | -----                   | : | -   |
| ARR23        | : | -----                   | : | -   |
| APRR1 / TOC1 | : | EEEEEEENRDSSPQDDALGT--- | : | 618 |
| APRR3        | : | SGSEDN-----             | : | 495 |
| APRR5        | : | -----                   | : | -   |
| APRR7        | : | DDNDIKNIEDS-----        | : | 727 |
| APRR9        | : | S-----                  | : | 468 |
| APRR2        | : | -----                   | : | -   |
| APRR4        | : | -----                   | : | -   |
| APRR6        | : | -----                   | : | -   |
| APRR8        | : | -----                   | : | -   |
| OsPRR1       | : | DPSREVEVMVSPE-----      | : | 518 |
| OsPRR37      | : | QQGGGREAADR-----        | : | 742 |
| OsPRR73      | : | ---AGQ--DEDR-----       | : | 767 |
| OsPRR59      | : | EAETD-----              | : | 699 |
| OsPRR95      | : | -----                   | : | -   |
| OsPRR10      | : | -----                   | : | -   |
| OsPRR11      | : | -----                   | : | -   |
| OsPRR12      | : | -----                   | : | -   |
| GmRR1        | : | -----                   | : | -   |
| GmRR2        | : | -----                   | : | -   |
| GmRR3        | : | -----                   | : | -   |
| GmRR4        | : | -----                   | : | -   |
| GmRR5        | : | -----                   | : | -   |
| GmRR6        | : | -----                   | : | -   |
| GmRR7        | : | -----                   | : | -   |
| GmRR8        | : | -----                   | : | -   |
| GmRR9        | : | -----                   | : | -   |
| GmRR10       | : | -----                   | : | -   |
| GmRR11       | : | -----                   | : | -   |
| GmRR12       | : | -----                   | : | -   |
| GmRR13       | : | -----                   | : | -   |
| GmRR14       | : | -----                   | : | -   |
| GmRR15       | : | -----                   | : | -   |
| GmRR16       | : | -----                   | : | -   |
| GmRR17       | : | -----                   | : | -   |
| GmRR18       | : | -----                   | : | -   |
| GmRR19       | : | -----                   | : | -   |
| GmRR20       | : | -----                   | : | -   |
| GmRR21       | : | -----                   | : | -   |
| GmRR22       | : | -----                   | : | -   |
| GmRR23       | : | -----                   | : | -   |
| GmRR24       | : | -----                   | : | -   |
| GmRR25       | : | -----                   | : | -   |
| GmRR26       | : | -----                   | : | -   |
| GmRR27       | : | -----                   | : | -   |
| GmRR28       | : | -----                   | : | -   |
| GmRR29       | : | -----                   | : | -   |
| GmRR30       | : | -----                   | : | -   |
| GmRR31       | : | -----                   | : | -   |
| GmRR32       | : | -----                   | : | -   |
| GmRR33       | : | -----                   | : | -   |
| GmRR34       | : | -----                   | : | -   |
| GmRR35       | : | -----                   | : | -   |
| GmRR36       | : | -----                   | : | -   |
| GmPRR37      | : | EDEDDQGARDSSPEDA-----   | : | 575 |
| GmPRR38      | : | EEEDNHGARDSSPEDA-----   | : | 455 |
| GmPRR39      | : | EKDCKEYDHSHTLERRA----   | : | 731 |
| GmPRR40      | : | DVGGGS-----             | : | 735 |
| GmPRR41      | : | ETSSLS-----             | : | 549 |
| GmPRR42      | : | SQNGDHYLTDSVPLTASSFLLSD | : | 549 |
| GmPRR43      | : | EKDGKEYDHSDF-----       | : | 691 |
| GmPRR44      | : | EAGGDS-----             | : | 709 |
| GmPRR45      | : | EAGGDS-----             | : | 722 |
| GmPRR46      | : | -----                   | : | -   |
| GmPRR47      | : | -----                   | : | -   |
| GmPRR48      | : | -----                   | : | -   |
| GmPRR49      | : | -----                   | : | -   |
