# Supplementary material for: Genome-Wide Analysis of Two-Component Systems and Prediction of Stress-Responsive Two-Component System Members in Soybean
Source: PubMed Central journal article supplement — DNA Res. 2010 Sep 3;17(5):303–24. doi: 10.1093/dnares/dsq021 (PMC2955714; doi:10.1093/dnares/dsq021), 2010-09-03
Supplement: supp_dsq021_dsq021supp_fig3.pdf [file supp_dsq021_dsq021supp_fig3.pdf]

|         | GmHP01 | GmHP02 | GmHP03 | GmHP04 | GmHP05 | GmHP06 | GmHP07 | GmHP08 | GmHP09 | GmHP10 | GmPHP01 | GmPHP02 | GmPHP03 | AHP1  | AHP2  | AHP3  | AHP4  | AHP5  | AHP6  | OsAHP1 | OsAHP2 | OsPHP1 | OsPHP2 | OsPHP3 |       |
|---------|--------|--------|--------|--------|--------|--------|--------|--------|--------|--------|---------|---------|---------|-------|-------|-------|-------|-------|-------|--------|--------|--------|--------|--------|-------|
| GmHP01  | ID     | 0.628  | 0.679  | 0.668  | 0.354  | 0.429  | 0.416  | 0.537  | 0.544  | 0.418  | 0.418   | 0.4     | 0.737   | 0.528 | 0.54  | 0.352 | 0.525 | 0.425 | 0.438 | 0.423  | 0.433  | 0.42   | 0.452  |        |       |
| GmHP02  | ID     | 0.634  | 0.678  | 0.668  | 0.36   | 0.429  | 0.416  | 0.531  | 0.537  | 0.425  | 0.425   | 0.406   | 0.73    | 0.522 | 0.534 | 0.358 | 0.531 | 0.431 | 0.445 | 0.429  | 0.433  | 0.42   | 0.452  |        |       |
| GmHP03  | 0.828  | 0.834  | ID     | 0.673  | 0.666  | 0.363  | 0.384  | 0.371  | 0.509  | 0.509  | 0.415   | 0.415   | 0.389   | 0.683 | 0.474 | 0.5   | 0.326 | 0.515 | 0.427 | 0.432  | 0.423  | 0.403  | 0.391  | 0.435  |       |
| GmHP04  | 0.679  | 0.679  | 0.673  | ID     | 0.64   | 0.38   | 0.435  | 0.428  | 0.539  | 0.546  | 0.414   | 0.414   | 0.392   | 0.632 | 0.484 | 0.512 | 0.38  | 0.522 | 0.419 | 0.459  | 0.433  | 0.45   | 0.424  | 0.422  |       |
| GmHP05  | 0.668  | 0.668  | 0.666  | 0.673  | ID     | 0.387  | 0.43   | 0.423  | 0.526  | 0.532  | 0.414   | 0.414   | 0.392   | 0.625 | 0.49  | 0.506 | 0.377 | 0.515 | 0.412 | 0.446  | 0.437  | 0.45   | 0.444  | 0.428  |       |
| GmHP06  | 0.354  | 0.36   | 0.363  | 0.38   | 0.387  | ID     | 0.287  | 0.297  | 0.441  | 0.429  | 0.291   | 0.291   | 0.277   | 0.352 | 0.367 | 0.375 | 0.345 | 0.371 | 0.291 | 0.337  | 0.322  | 0.296  | 0.322  | 0.277  |       |
| GmHP07  | 0.429  | 0.429  | 0.384  | 0.435  | 0.43   | 0.287  | ID     | 0.372  | 0.372  | 0.379  | 0.379   | 0.346   | 0.346   | 0.35  | 0.4   | 0.403 | 0.393 | 0.608 | 0.388 | 0.318  | 0.378  | 0.373  | 0.625  | 0.539  | 0.562 |
| GmHP08  | 0.416  | 0.416  | 0.371  | 0.428  | 0.423  | 0.287  | 0.372  | ID     | 0.372  | 0.372  | 0.346   | 0.346   | 0.35    | 0.393 | 0.403 | 0.38  | 0.614 | 0.375 | 0.311 | 0.378  | 0.373  | 0.598  | 0.519  | 0.535  |       |
| GmHP09  | 0.537  | 0.531  | 0.509  | 0.538  | 0.526  | 0.41   | 0.379  | 0.372  | ID     | 0.42   | 0.42    | 0.405   | 0.512   | 0.503 | 0.519 | 0.359 | 0.528 | 0.438 | 0.421 | 0.411  | 0.383  | 0.378  | 0.361  |        |       |
| GmHP10  | 0.544  | 0.537  | 0.509  | 0.546  | 0.532  | 0.429  | 0.379  | 0.372  | 0.372  | ID     | 0.42    | 0.42    | 0.405   | 0.525 | 0.509 | 0.525 | 0.359 | 0.535 | 0.438 | 0.421  | 0.411  | 0.383  | 0.383  | 0.361  |       |
| GmPHP01 | 0.418  | 0.425  | 0.415  | 0.414  | 0.414  | 0.291  | 0.346  | 0.346  | 0.42   | 0.42   | ID      | 0.346   | 0.346   | 0.397 | 0.411 | 0.369 | 0.397 | 0.326 | 0.373 | 0.794  | 0.346  | 0.331  | 0.378  | 0.352  | 0.352 |
| GmPHP02 | 0.418  | 0.425  | 0.415  | 0.414  | 0.414  | 0.291  | 0.346  | 0.346  | 0.42   | 0.42   | 0.346   | ID      | 0.346   | 0.397 | 0.411 | 0.369 | 0.397 | 0.326 | 0.373 | 0.788  | 0.346  | 0.331  | 0.378  | 0.352  | 0.352 |
| GmPHP03 | 0.4    | 0.406  | 0.389  | 0.392  | 0.392  | 0.27   | 0.35   | 0.35   | 0.405  | 0.405  | 0.392   | 0.343   | ID      | 0.392 | 0.343 | 0.392 | 0.331 | 0.367 | 0.726 | 0.331  | 0.329  | 0.363  | 0.343  | 0.337  |       |
| AHP1    | 0.737  | 0.73   | 0.683  | 0.632  | 0.625  | 0.352  | 0.4    | 0.393  | 0.512  | 0.525  | 0.411   | 0.411   | 0.392   | ID    | 0.471 | 0.509 | 0.335 | 0.512 | 0.424 | 0.441  | 0.438  | 0.425  | 0.4    | 0.4    |       |
| AHP2    | 0.528  | 0.522  | 0.474  | 0.484  | 0.49   | 0.367  | 0.403  | 0.403  | 0.503  | 0.509  | 0.369   | 0.369   | 0.343   | 0.471 | ID    | 0.807 | 0.371 | 0.707 | 0.369 | 0.391  | 0.382  | 0.403  | 0.391  | 0.371  |       |
| AHP3    | 0.54   | 0.534  | 0.5    | 0.512  | 0.506  | 0.375  | 0.393  | 0.38   | 0.519  | 0.525  | 0.397   | 0.397   | 0.382   | 0.509 | 0.807 | ID    | 0.374 | 0.707 | 0.391 | 0.4    | 0.371  | 0.406  | 0.393  | 0.361  |       |
| AHP4    | 0.352  | 0.359  | 0.325  | 0.38   | 0.377  | 0.345  | 0.806  | 0.814  | 0.359  | 0.359  | 0.325   | 0.325   | 0.331   | 0.335 | 0.371 | 0.374 | ID    | 0.374 | 0.356 | 0.299  | 0.351  | 0.326  | 0.486  | 0.467  |       |
| AHP5    | 0.525  | 0.531  | 0.515  | 0.522  | 0.515  | 0.371  | 0.388  | 0.375  | 0.528  | 0.535  | 0.373   | 0.373   | 0.367   | 0.512 | 0.707 | 0.707 | 0.356 | ID    | 0.392 | 0.433  | 0.411  | 0.401  | 0.394  | 0.382  |       |
| AHP6    | 0.425  | 0.431  | 0.427  | 0.419  | 0.412  | 0.291  | 0.318  | 0.311  | 0.438  | 0.438  | 0.794   | 0.788   | 0.726   | 0.424 | 0.369 | 0.391 | 0.298 | 0.392 | ID    | 0.337  | 0.335  | 0.354  | 0.354  | 0.346  |       |
| OsAHP1  | 0.438  | 0.445  | 0.432  | 0.459  | 0.446  | 0.337  | 0.378  | 0.378  | 0.421  | 0.421  | 0.346   | 0.346   | 0.331   | 0.441 | 0.391 | 0.4   | 0.351 | 0.433 | 0.337 | ID     | 0.711  | 0.361  | 0.348  | 0.346  |       |
| OsAHP2  | 0.423  | 0.429  | 0.423  | 0.433  | 0.437  | 0.322  | 0.373  | 0.373  | 0.411  | 0.411  | 0.331   | 0.331   | 0.329   | 0.438 | 0.382 | 0.371 | 0.329 | 0.411 | 0.335 | 0.711  | ID     | 0.366  | 0.339  | 0.344  |       |
| OsPHP1  | 0.433  | 0.433  | 0.403  | 0.45   | 0.45   | 0.296  | 0.625  | 0.598  | 0.383  | 0.383  | 0.378   | 0.378   | 0.363   | 0.425 | 0.403 | 0.406 | 0.496 | 0.401 | 0.354 | 0.361  | 0.366  | ID     | 0.688  | 0.815  |       |
| OsPHP2  | 0.42   | 0.42   | 0.391  | 0.424  | 0.444  | 0.322  | 0.539  | 0.519  | 0.376  | 0.383  | 0.352   | 0.352   | 0.343   | 0.4   | 0.391 | 0.393 | 0.463 | 0.394 | 0.354 | 0.348  | 0.339  | 0.688  | ID     | 0.638  |       |
| OsPHP3  | 0.452  | 0.452  | 0.435  | 0.422  | 0.428  | 0.277  | 0.562  | 0.535  | 0.361  | 0.361  | 0.352   | 0.352   | 0.337   | 0.4   | 0.371 | 0.361 | 0.467 | 0.382 | 0.346 | 0.346  | 0.344  | 0.615  | 0.638  | ID     |       |
