# Supplementary material for: Genome-Wide Analysis of Two-Component Systems and Prediction of Stress-Responsive Two-Component System Members in Soybean
Source: PubMed Central journal article supplement — DNA Res. 2010 Sep 3;17(5):303–24. doi: 10.1093/dnares/dsq021 (PMC2955714; doi:10.1093/dnares/dsq021), 2010-09-03
Supplement: supp_dsq021_dsq021supp_fig5.pdf [file supp_dsq021_dsq021supp_fig5.pdf]

|        | GmHK01   | GmHK02   | GmHK03  | GmHK04   | GmHK05   | GmHK06   | GmHK07   | GmHK08   | GmHK09   | GmHK10   | GmHK11   | GmHK12   | GmHK13   | GmHK14 | GmHK15 | GmHK16 | GmHK17   | GmERS1 | GmERS2   | GmETR1 | GmETR2   | CK11     | AHK5     | AHK1     | AHK2  | AHK3     | AHK4     | ERS1     | ETR1  | OshK1 | OshK2 | OshK3 | OshK4 | OshK5 | OshK6 | OseERS1 | OseERS2 |       |
|--------|----------|----------|---------|----------|----------|----------|----------|----------|----------|----------|----------|----------|----------|--------|--------|--------|----------|--------|----------|--------|----------|----------|----------|----------|-------|----------|----------|----------|-------|-------|-------|-------|-------|-------|-------|---------|---------|-------|
| GmHK01 | ID       | 0.115    | 0.108   | 0.112    | 0.115    | 0.113    | 0.178    | 0.177    | 0.177    | 0.112    | 0.12     | 0.119    | 0.12     | 0.122  | 0.12   | 0.123  | 0.119    | 0.081  | 0.082    | 0.085  | 0.085    | 0.346    | 0.12     | 0.177    | 0.108 | 0.122    | 0.116    | 0.076    | 0.087 | 0.121 | 0.221 | 0.121 | 0.119 | 0.099 | 0.125 | 0.075   | 0.056   |       |
| GmHK02 | 0.116 ID | 0.109    | 0.105   | 0.108    | 0.107    | 0.117    | 0.115    | 0.118    | 0.14     | 0.15     | 0.149    | 0.149    | 0.15     | 0.151  | 0.15   | 0.149  | 0.122    | 0.121  | 0.125    | 0.125  | 0.115    | 0.607    | 0.112    | 0.131    | 0.15  | 0.139    | 0.116    | 0.117    | 0.811 | 0.117 | 0.157 | 0.153 | 0.128 | 0.15  | 0.118 | 0.064   |         |       |
| GmHK03 | 0.108    | 0.707 ID | 0.82    | 0.603    | 0.506    | 0.113    | 0.109    | 0.112    | 0.137    | 0.147    | 0.151    | 0.149    | 0.152    | 0.155  | 0.151  | 0.151  | 0.125    | 0.123  | 0.114    | 0.116  | 0.117    | 0.557    | 0.109    | 0.127    | 0.151 | 0.139    | 0.112    | 0.111    | 0.495 | 0.113 | 0.153 | 0.146 | 0.127 | 0.153 | 0.12  | 0.082   |         |       |
| GmHK04 | 0.112    | 0.705    | 0.82 ID | 0.597    | 0.518    | 0.116    | 0.111    | 0.116    | 0.138    | 0.147    | 0.156    | 0.154    | 0.156    | 0.158  | 0.155  | 0.155  | 0.116    | 0.114  | 0.115    | 0.116  | 0.119    | 0.556    | 0.113    | 0.126    | 0.151 | 0.14     | 0.105    | 0.108    | 0.487 | 0.118 | 0.152 | 0.15  | 0.127 | 0.152 | 0.112 | 0.078   |         |       |
| GmHK05 | 0.115    | 0.769    | 0.603   | 0.597 ID | 0.772    | 0.114    | 0.112    | 0.114    | 0.134    | 0.143    | 0.146    | 0.145    | 0.142    | 0.144  | 0.142  | 0.14   | 0.107    | 0.105  | 0.115    | 0.115  | 0.107    | 0.526    | 0.111    | 0.122    | 0.144 | 0.134    | 0.1      | 0.102    | 0.438 | 0.115 | 0.147 | 0.151 | 0.12  | 0.149 | 0.104 | 0.07    |         |       |
| GmHK06 | 0.113    | 0.637    | 0.506   | 0.518    | 0.772 ID | 0.109    | 0.104    | 0.106    | 0.136    | 0.144    | 0.144    | 0.142    | 0.141    | 0.144  | 0.142  | 0.141  | 0.105    | 0.103  | 0.106    | 0.106  | 0.101    | 0.456    | 0.11     | 0.123    | 0.141 | 0.129    | 0.097    | 0.397    | 0.108 | 0.148 | 0.147 | 0.122 | 0.146 | 0.099 | 0.064 |         |         |       |
| GmHK07 | 0.178    | 0.117    | 0.113   | 0.116    | 0.114    | 0.109 ID | 0.119    | 0.119    | 0.139    | 0.138    | 0.138    | 0.138    | 0.138    | 0.138  | 0.139  | 0.134  | 0.133    | 0.09   | 0.093    | 0.107  | 0.107    | 0.18     | 0.114    | 0.635    | 0.128 | 0.148    | 0.142    | 0.084    | 0.105 | 0.117 | 0.177 | 0.136 | 0.136 | 0.135 | 0.09  | 0.072   |         |       |
| GmHK08 | 0.177    | 0.115    | 0.109   | 0.111    | 0.112    | 0.104    | 0.971 ID | 0.783    | 0.136    | 0.138    | 0.138    | 0.137    | 0.136    | 0.136  | 0.131  | 0.13   | 0.089    | 0.091  | 0.105    | 0.105  | 0.18     | 0.112    | 0.624    | 0.124    | 0.145 | 0.138    | 0.083    | 0.103    | 0.113 | 0.171 | 0.132 | 0.134 | 0.134 | 0.133 | 0.089 | 0.07    |         |       |
| GmHK09 | 0.177    | 0.118    | 0.112   | 0.116    | 0.114    | 0.106    | 0.922    | 0.788 ID | 0.134    | 0.135    | 0.136    | 0.134    | 0.13     | 0.13   | 0.126  | 0.125  | 0.086    | 0.089  | 0.104    | 0.104  | 0.181    | 0.119    | 0.656    | 0.119    | 0.14  | 0.128    | 0.082    | 0.102    | 0.114 | 0.17  | 0.129 | 0.132 | 0.131 | 0.129 | 0.085 | 0.086   |         |       |
| GmHK10 | 0.112    | 0.14     | 0.137   | 0.138    | 0.134    | 0.136    | 0.136    | 0.136    | 0.134 ID | 0.131    | 0.493    | 0.486    | 0.453    | 0.456  | 0.440  | 0.453  | 0.113    | 0.112  | 0.113    | 0.128  | 0.126    | 0.142    | 0.135    | 0.566    | 0.458 | 0.446    | 0.103    | 0.127    | 0.153 | 0.134 | 0.471 | 0.446 | 0.455 | 0.423 | 0.113 | 0.079   |         |       |
| GmHK11 | 0.12     | 0.15     | 0.147   | 0.147    | 0.143    | 0.144    | 0.138    | 0.138    | 0.135    | 0.616 ID | 0.507    | 0.503    | 0.492    | 0.494  | 0.485  | 0.49   | 0.122    | 0.121  | 0.136    | 0.134  | 0.133    | 0.163    | 0.134    | 0.56     | 0.513 | 0.46     | 0.11     | 0.137    | 0.165 | 0.142 | 0.494 | 0.476 | 0.452 | 0.452 | 0.121 | 0.083   |         |       |
| GmHK12 | 0.119    | 0.149    | 0.151   | 0.156    | 0.146    | 0.144    | 0.139    | 0.138    | 0.136    | 0.493    | 0.507 ID | 0.498    | 0.464    | 0.466  | 0.452  | 0.456  | 0.117    | 0.116  | 0.132    | 0.133  | 0.134    | 0.156    | 0.133    | 0.454    | 0.679 | 0.459    | 0.11     | 0.128    | 0.159 | 0.13  | 0.574 | 0.463 | 0.424 | 0.434 | 0.126 | 0.088   |         |       |
| GmHK13 | 0.12     | 0.149    | 0.149   | 0.154    | 0.145    | 0.142    | 0.138    | 0.137    | 0.134    | 0.486    | 0.503    | 0.498 ID | 0.458    | 0.461  | 0.452  | 0.453  | 0.114    | 0.113  | 0.128    | 0.129  | 0.135    | 0.154    | 0.131    | 0.451    | 0.677 | 0.452    | 0.109    | 0.127    | 0.156 | 0.13  | 0.577 | 0.463 | 0.426 | 0.434 | 0.125 | 0.088   |         |       |
| GmHK14 | 0.122    | 0.15     | 0.152   | 0.156    | 0.142    | 0.141    | 0.138    | 0.135    | 0.13     | 0.453    | 0.492    | 0.464    | 0.458 ID | 0.454  | 0.454  | 0.454  | 0.122    | 0.121  | 0.14     | 0.14   | 0.125    | 0.149    | 0.131    | 0.428    | 0.469 | 0.656    | 0.124    | 0.143    | 0.158 | 0.135 | 0.454 | 0.469 | 0.394 | 0.542 | 0.128 | 0.094   |         |       |
| GmHK15 | 0.12     | 0.151    | 0.155   | 0.158    | 0.144    | 0.14     | 0.139    | 0.136    | 0.13     | 0.456    | 0.494    | 0.466    | 0.461    | 0.461  | 0.461  | 0.461  | 0.12     | 0.122  | 0.139    | 0.139  | 0.126    | 0.153    | 0.131    | 0.429    | 0.473 | 0.654    | 0.12     | 0.141    | 0.16  | 0.137 | 0.455 | 0.556 | 0.394 | 0.546 | 0.125 | 0.09    |         |       |
| GmHK16 | 0.123    | 0.15     | 0.151   | 0.155    | 0.142    | 0.142    | 0.134    | 0.131    | 0.126    | 0.449    | 0.485    | 0.462    | 0.452    | 0.452  | 0.452  | 0.452  | 0.117    | 0.12   | 0.135    | 0.135  | 0.126    | 0.146    | 0.129    | 0.423    | 0.464 | 0.634    | 0.121    | 0.139    | 0.158 | 0.135 | 0.45  | 0.546 | 0.395 | 0.534 | 0.12  | 0.083   |         |       |
| GmHK17 | 0.119    | 0.149    | 0.151   | 0.155    | 0.14     | 0.141    | 0.133    | 0.13     | 0.125    | 0.453    | 0.49     | 0.466    | 0.453    | 0.453  | 0.453  | 0.453  | 0.118    | 0.119  | 0.133    | 0.133  | 0.129    | 0.148    | 0.13     | 0.424    | 0.464 | 0.634    | 0.116    | 0.136    | 0.159 | 0.137 | 0.449 | 0.552 | 0.395 | 0.536 | 0.118 | 0.082   |         |       |
| GmERS1 | 0.081    | 0.122    | 0.125   | 0.116    | 0.107    | 0.105    | 0.09     | 0.089    | 0.086    | 0.113    | 0.122    | 0.117    | 0.114    | 0.122  | 0.112  | 0.117  | 0.118 ID | 0.117  | 0.111    | 0.606  | 0.607    | 0.602    | 0.082    | 0.128    | 0.087 | 0.102    | 0.12     | 0.109    | 0.728 | 0.586 | 0.112 | 0.083 | 0.114 | 0.117 | 0.102 | 0.117   | 0.705   | 0.571 |
| GmERS2 | 0.082    | 0.121    | 0.123   | 0.114    | 0.105    | 0.103    | 0.093    | 0.091    | 0.089    | 0.112    | 0.121    | 0.116    | 0.113    | 0.121  | 0.122  | 0.12   | 0.119 ID | 0.119  | 0.119    | 0.607  | 0.607    | 0.609    | 0.082    | 0.125    | 0.087 | 0.1      | 0.119    | 0.108    | 0.726 | 0.591 | 0.111 | 0.082 | 0.113 | 0.115 | 0.101 | 0.116   | 0.702   | 0.568 |
| GmETR1 | 0.085    | 0.125    | 0.114   | 0.115    | 0.115    | 0.106    | 0.107    | 0.105    | 0.104    | 0.13     | 0.136    | 0.132    | 0.128    | 0.14   | 0.139  | 0.135  | 0.133    | 0.606  | 0.609 ID | 0.606  | 0.606    | 0.081    | 0.125    | 0.105    | 0.123 | 0.128    | 0.131    | 0.568    | 0.616 | 0.118 | 0.087 | 0.126 | 0.13  | 0.112 | 0.113 | 0.629   | 0.504   |       |
| GmETR2 | 0.085    | 0.125    | 0.116   | 0.116    | 0.115    | 0.106    | 0.107    | 0.105    | 0.104    | 0.128    | 0.134    | 0.133    | 0.129    | 0.14   | 0.139  | 0.135  | 0.133    | 0.607  | 0.607 ID | 0.606  | 0.606    | 0.081    | 0.124    | 0.105    | 0.123 | 0.127    | 0.132    | 0.566    | 0.616 | 0.118 | 0.087 | 0.128 | 0.131 | 0.112 | 0.131 | 0.627   | 0.506   |       |
| CK11   | 0.346    | 0.15     | 0.117   | 0.119    | 0.107    | 0.101    | 0.18     | 0.18     | 0.181    | 0.126    | 0.133    | 0.134    | 0.135    | 0.125  | 0.126  | 0.126  | 0.129    | 0.082  | 0.082    | 0.081  | 0.081 ID | 0.119    | 0.183    | 0.117    | 0.134 | 0.129    | 0.078    | 0.087    | 0.111 | 0.216 | 0.13  | 0.129 | 0.116 | 0.126 | 0.081 | 0.058   |         |       |
| AHK5   | 0.12     | 0.597    | 0.557   | 0.556    | 0.526    | 0.456    | 0.114    | 0.112    | 0.118    | 0.142    | 0.153    | 0.156    | 0.154    | 0.149  | 0.153  | 0.146  | 0.148    | 0.128  | 0.125    | 0.125  | 0.124    | 0.119 ID | 0.116    | 0.127    | 0.151 | 0.142    | 0.12     | 0.117    | 0.473 | 0.126 | 0.156 | 0.157 | 0.13  | 0.158 | 0.126 | 0.087   |         |       |
| AHK1   | 0.177    | 0.112    | 0.109   | 0.113    | 0.111    | 0.11     | 0.835    | 0.824    | 0.826    | 0.135    | 0.134    | 0.133    | 0.131    | 0.131  | 0.131  | 0.129  | 0.13     | 0.087  | 0.087    | 0.105  | 0.105    | 0.163    | 0.166 ID | 0.116    | 0.126 | 0.136    | 0.134    | 0.084    | 0.105 | 0.112 | 0.164 | 0.133 | 0.134 | 0.136 | 0.126 | 0.087   | 0.069   |       |
| AHK2   | 0.108    | 0.131    | 0.127   | 0.126    | 0.122    | 0.123    | 0.128    | 0.124    | 0.119    | 0.566    | 0.56     | 0.564    | 0.551    | 0.428  | 0.429  | 0.423  | 0.424    | 0.102  | 0.1      | 0.123  | 0.123    | 0.117    | 0.127    | 0.126 ID | 0.146 | 0.426    | 0.059    | 0.122    | 0.135 | 0.122 | 0.443 | 0.415 | 0.456 | 0.38  | 0.104 | 0.081   |         |       |
| AHK3   | 0.122    | 0.15     | 0.151   | 0.151    | 0.144    | 0.141    | 0.148    | 0.145    | 0.14     | 0.498    | 0.513    | 0.679    | 0.677    | 0.469  | 0.473  | 0.464  | 0.464    | 0.12   | 0.119    | 0.128  | 0.127    | 0.134    | 0.151    | 0.136    | 0.46  | 0.46     | 0.457    | 0.11     | 0.127 | 0.155 | 0.138 | 0.579 | 0.472 | 0.417 | 0.445 | 0.123   | 0.091   |       |
| AHK4   | 0.116    | 0.139    | 0.139   | 0.14     | 0.134    | 0.129    | 0.142    | 0.138    | 0.128    | 0.445    | 0.46     | 0.459    | 0.452    | 0.656  | 0.654  | 0.634  | 0.632    | 0.109  | 0.108    | 0.131  | 0.132    | 0.129    | 0.142    | 0.134    | 0.426 | 0.467 ID | 0.105    | 0.135    | 0.15  | 0.135 | 0.444 | 0.631 | 0.394 | 0.61  | 0.119 | 0.081   |         |       |
| ERS1   | 0.076    | 0.116    | 0.112   | 0.105    | 0.1      | 0.097    | 0.084    | 0.083    | 0.082    | 0.103    | 0.11     | 0.11     | 0.109    | 0.124  | 0.12   | 0.121  | 0.116    | 0.729  | 0.726    | 0.688  | 0.686    | 0.078    | 0.12     | 0.084    | 0.099 | 0.11     | 0.108 ID | 0.111    | 0.069 | 0.103 | 0.113 | 0.092 | 0.105 | 0.087 | 0.069 |         |         |       |
| ETR1   | 0.087    | 0.117    | 0.111   | 0.108    | 0.102    | 0.097    | 0.105    | 0.103    | 0.102    | 0.127    | 0.137    | 0.128    | 0.127    | 0.143  | 0.141  | 0.139  | 0.136    | 0.586  | 0.591    | 0.616  | 0.616    | 0.087    | 0.117    | 0.105    | 0.122 | 0.127    | 0.135    | 0.548 ID | 0.11  | 0.085 | 0.126 | 0.132 | 0.111 | 0.132 | 0.618 | 0.485   |         |       |
| OshK1  | 0.121    | 0.511</  |         |          |          |          |          |          |          |          |          |          |          |        |        |        |          |        |          |        |          |          |          |          |       |          |          |          |       |       |       |       |       |       |       |         |         |       |
