# Supplementary material for: Genome-Wide Analysis of Two-Component Systems and Prediction of Stress-Responsive Two-Component System Members in Soybean
Source: PubMed Central journal article supplement — DNA Res. 2010 Sep 3;17(5):303–24. doi: 10.1093/dnares/dsq021 (PMC2955714; doi:10.1093/dnares/dsq021), 2010-09-03
Supplement: supp_dsq021_dsq021supp_fig6.pdf [file supp_dsq021_dsq021supp_fig6.pdf]

|        |   |                                                                             |   |    |
|--------|---|-----------------------------------------------------------------------------|---|----|
| CKI1   | : | -----                                                                       | : | -  |
| AHK5   | : | -----                                                                       | : | -  |
| AHK1   | : | -----                                                                       | : | -  |
| AHK2   | : | MSITCELLNLTSSKAKKSSSSDKKWLKKPLFFLILCGSLVIVLVMFLRLGRSQKEETDSCNGEELVLYRHQNVTR | : | 75 |
| AHK3   | : | -----                                                                       | : | -  |
| AHK4   | : | -----MNWALNNHQEEEEPRRIEISDSESLLENLKS                                        | : | 31 |
| ERS1   | : | -----                                                                       | : | -  |
| ETR1   | : | -----                                                                       | : | -  |
| OsHK1  | : | -----                                                                       | : | -  |
| OsHK2  | : | -----                                                                       | : | -  |
| OsHK3  | : | -----                                                                       | : | -  |
| OsHK4  | : | -----                                                                       | : | -  |
| OsHK5  | : | ----MSRVGECGGGGCGARRGKAAHAGAGAVAGFLGCLLLVWAMGGCGRGCGGGGGEGVRDRVEEVAAQFNLSM  | : | 71 |
| OsHK6  | : | -----                                                                       | : | -  |
| OsERS1 | : | -----                                                                       | : | -  |
| OsERS2 | : | -----                                                                       | : | -  |
| GmHK01 | : | -----                                                                       | : | -  |
| GmHK02 | : | -----                                                                       | : | -  |
| GmHK03 | : | -----                                                                       | : | -  |
| GmHK04 | : | -----                                                                       | : | -  |
| GmHK05 | : | -----                                                                       | : | -  |
| GmHK06 | : | -----                                                                       | : | -  |
| GmHK07 | : | -----                                                                       | : | -  |
| GmHK08 | : | -----                                                                       | : | -  |
| GmHK09 | : | -----                                                                       | : | -  |
| GmHK10 | : | -----MCPENQELQKEHTCVVD-----TVEP                                             | : | 21 |
| GmHK11 | : | -----                                                                       | : | -  |
| GmHK12 | : | -----                                                                       | : | -  |
| GmHK13 | : | -----                                                                       | : | -  |
| GmHK14 | : | -----                                                                       | : | -  |
| GmHK15 | : | -----                                                                       | : | -  |
| GmHK16 | : | -----                                                                       | : | -  |
| GmHK17 | : | -----                                                                       | : | -  |
| GmERS1 | : | -----                                                                       | : | -  |
| GmERS2 | : | -----                                                                       | : | -  |
| GmETR1 | : | -----                                                                       | : | -  |
| GmETR2 | : | -----                                                                       | : | -  |

|        |   |                                                                              |   |     |
|--------|---|------------------------------------------------------------------------------|---|-----|
| CKI1   | : | -----                                                                        | : | -   |
| AHK5   | : | -----                                                                        | : | -   |
| AHK1   | : | -----MRGDSFSMSIENLPDSPMGSRKKKMQIRKVFDMTEWVTPWRSNLESPREMM                     | : | 52  |
| AHK2   | : | SEIHDLVSLFSDSDQVTSFECHKESSPGMWTNYGITCSLSVRSKQETRGLPWNLGLGHSISSSTSCMCGNLEPIL  | : | 150 |
| AHK3   | : | MSLFHVLGFGVKIGHLF-----WMLCCWFVSWFVDN-----                                    | : | 31  |
| AHK4   | : | SDFYQLGGGGALNSSEKPRKID-----                                                  | : | 53  |
| ERS1   | : | -----                                                                        | : | -   |
| ETR1   | : | -----                                                                        | : | -   |
| OsHK1  | : | -----                                                                        | : | -   |
| OsHK2  | : | -----                                                                        | : | -   |
| OsHK3  | : | MDEMSCGGGGGAR-----WKRARVAGM-----                                             | : | 23  |
| OsHK4  | : | -----                                                                        | : | -   |
| OsHK5  | : | SKLQALASLLSPERECICKSGTINDDNPAHSMPDMSNCRLLKNKPSGGNQNRDLNVI IQDCCANEDNYDKNNHEN | : | 146 |
| OsHK6  | : | -----                                                                        | : | -   |
| OsERS1 | : | -----                                                                        | : | -   |
| OsERS2 | : | -----                                                                        | : | -   |
| GmHK01 | : | -----                                                                        | : | -   |
| GmHK02 | : | -----                                                                        | : | -   |
| GmHK03 | : | -----                                                                        | : | -   |
| GmHK04 | : | -----                                                                        | : | -   |
| GmHK05 | : | -----                                                                        | : | -   |
| GmHK06 | : | -----                                                                        | : | -   |
| GmHK07 | : | -----MG-----SKCRYLFHRLCACATSWNKNS-TPKGRR                                     | : | 29  |
| GmHK08 | : | -----MG-----SKCRYLFHRLCGCDTSWNKNS-TPKSRR                                     | : | 29  |
| GmHK09 | : | -----MG-----IKCIHVFDRLYSFFTCSKKST-MPSGRR                                     | : | 29  |
| GmHK10 | : | IEQCPILDDYVQTRLELSFPLK-----NY--VSLALRS-----ALSTDLTLLLSLCNNYE---              | : | 69  |
| GmHK11 | : | -----                                                                        | : | -   |
| GmHK12 | : | MSLLHVVGFLKVGHLL-----LVLCCWVSVVYLN-----                                      | : | 31  |
| GmHK13 | : | MSLLHVVGFKLVGHLL-----LVLCCWVSVVYLN-----                                      | : | 31  |
| GmHK14 | : | -----                                                                        | : | -   |
| GmHK15 | : | -----                                                                        | : | -   |
| GmHK16 | : | -----                                                                        | : | -   |
| GmHK17 | : | -----                                                                        | : | -   |
| GmERS1 | : | -----                                                                        | : | -   |
| GmERS2 | : | -----                                                                        | : | -   |
| GmETR1 | : | -----                                                                        | : | -   |
| GmETR2 | : | -----                                                                        | : | -   |

CKI1 : -----MMVKVTKLVASRPVVFVCLAFVVFECIWIWISNWRRTTLENLVKEVASFTEDLRTSLVS--- : 59  
 AHK5 : ----- : -  
 AHK1 : ILRGDVEQDEFQYASSHCLSSYYSVFFVRLAIMVMLAILIGLLTTLVHFWHTRIYTKQSLQTLAYGLRYELLQRPV : 127  
 AHK2 : QQPENLEEEENHEEGLEQGLSSYLRLNAWWCLILGVLVCHKIYVSHSKAR-----GERKEKVLHLEALA : 212  
 AHK3 : -----GIEDKSGLLVGSGDLEKTKMTTLKKNK-----MWFWNKISSSGLKI : 74  
 AHK4 : -----FWRSGLMGFAKMQQQQLQHSVAVKMNN-----NNNN : 85  
 ERS1 : ----- : -  
 ETR1 : ----- : -  
 OsHK1 : ----- : -  
 OsHK2 : -----MREVVEVSKWRRRCYFWILFP----- : 22  
 OsHK3 : -----GEGKAGGGGGAFLGLERVGMVVRMLP-----VPEKVSARARVV : 62  
 OsHK4 : -----MGVGGGGGGGGGEEAAAFAVE----- : 21  
 OsHK5 : NLLQONAMQQDIGSPTTLWNLCLCDLIVINGLNVQQNNALSFNHGMIFSLASLGIVVILVVITIFKRGKQANEL : 221  
 OsHK6 : -----MGK----- : 3  
 OsERS1 : ----- : -  
 OsERS2 : ----- : -  
 GmHK01 : ----- : -  
 GmHK02 : ----- : -  
 GmHK03 : ----- : -  
 GmHK04 : ----- : -  
 GmHK05 : ----- : -  
 GmHK06 : ----- : -  
 GmHK07 : IFHRDVEKEEFQYASSHCLSSYYSVFFVRLAIMVMLAILIGLLTILTWHFTKIYTKSLSSLAYGLRYELLQRPV : 104  
 GmHK08 : IFHRDVEKEEFQYASSHCLSSYYSVFFVRLAIMVMLAILIGLLTILTWHFTKIYTKSLRSLAYGLRYELLQRPV : 104  
 GmHK09 : IFHRDVEKEEFQYASTQCLSSYYSVFFVRLAIMAMLAAILIGLLTFLTWHTKIYTKSLNSLAYDLRYELLQRPV : 104  
 GmHK10 : -----GVHSLHGCWWV-IGIIMSIFCLLWRS-----QKQKLVQGHGAQ : 107  
 GmHK11 : -----SNLIKGCWWVLIGITMSYFCLLWRN-----QKQKLVQGHGAQ : 38  
 GmHK12 : -----WFLSSGIIMDTKMGGGGGGSKMWHK-----WWEKISGQGCKI : 70  
 GmHK13 : -----WFISSGIMETKMMGGGGGGGSKMWHK-----WWENISGQGCKI : 70  
 GmHK14 : -----LKMQSHHPVALRLH----- : 14  
 GmHK15 : -----LKMQNHPVALRLH----- : 14  
 GmHK16 : -----MALKLH----- : 6  
 GmHK17 : -----MKSLRHPMALKIH----- : 14  
 GmERS1 : ----- : -  
 GmERS2 : ----- : -  
 GmETR1 : ----- : -  
 GmETR2 : ----- : -

CKI1 : -----EIENIGKFTYAKTNLSTIGLARVIDSYITNNDTGFTIQTQIAPLLFVAYSTILQVSQVSYISRDGLMFS : 129  
 AHK5 : -MVCEMETDQIEEMDVEVLSSMWPEDVGTADKQFNVEKPGDLDTLKEVT-IETRTIADMTRLNLLNSTHQGS : 73  
 AHK1 : LRMWSVLNNTTSELTTAQVKLSEYVIKKYDKPTTQEELVEMYQAMKDVWALFAS-AKALNAITINYRNGFVQAFH : 201  
 AHK2 : PKKQQQRAQTSSRGAGRWRKNIILLGILGGVSFSVWWFWDTNEEIIIMKRRETLANMCDERARVLQDQFNVS LNHV : 287  
 AHK3 : PSFSYQFLGSKVFNKAWWRK-LVVVWVFWVLSIWTFWYFSSQAMEKRKETLASMCDERARMLQDQFNVS MNHV : 148  
 AHK4 : DLMGNKKGSTFIQHRALLPKALILWIIIVGFISSGIYQWMDANKIRREEVLVSMCDQARMLQDQFVS SVNHV : 160  
 ERS1 : -----MESCDCFETHVNQDILLVYQYISDFIALAYFSIPLELIYFVKSAFFPYRWVLMQFGAFIVLCGAT : 68  
 ETR1 : -----MEVCNCIEPQWPADELLMKYQYISDFIALAYFSIPLELIYFVKSAFFPYRWVLMQFGAFIVLCGAT : 68  
 OsHK1 : -----MGDEYLAPEPEDEVAISMWPENIGDKHQKQFKMEKLGKQDQDALEDANFQKPSVDLNRMLMELAN-SEKGV : 69  
 OsHK2 : ---LAVIATCMTITVVTFCSTMYMTEVMGEATKGAMDSALMHIAGNMRPLLEANRSVFTIANTLHVQGNMASFS : 94  
 OsHK3 : RGSLVAHFRGWRVRETWWW-VLLLWILAGSLGSFYLFMNAQSLDKRRDSLASMCDERARMLQDQFNVS MNHL : 136  
 OsHK4 : -GDEAGKGRWVRVVKLSTVAVVAWVLAALWAGLHWRFRRAALHKAEEALVCMCEERARMLQDQFAVSVNHV : 95  
 OsHK5 : CQHEKLLQTPSVKISRKWSKRALLLGVVLGCLSSVWIFSSMHADVARRIENLENMCDERARMLQDQFNVS MNHV : 296  
 OsHK6 : --PEARSG---WRN-----AAAAAWLVAVACAAYMHWHLRRETMDRAERLVSMEERARMLQEFGVTVNHV : 67  
 OsERS1 : -----MDG-CDCIEPLWPTDELLIKYQYISDFIALAYFSIPLELIYFVKSSFFPYRWVLIQFGAFIVLCGAT : 68  
 OsERS2 : -----MDGSCDCIEPLWQADDLLVYQYISDFIALAYFSIPLELIYFVKSAFFPYRWVLIQFGAFIVLCGAT : 69  
 GmHK01 : -----MYS : 3  
 GmHK02 : -----MENDCIKMDIEVVPMSWPEDIGMEVGKQFNIEKPGRDQDMLEEVTTIEEPTIVDFKRLMELTNFTEKGS : 70  
 GmHK03 : -MVCEMESDCIEDMDIEVLSSMWPEDIGTDVGKQFNIEKPGRDQDMLEEVTTIEEPTIADFQRLMELTNYTDKGS : 74  
 GmHK04 : -MVCEMESDCIEDMDIEVLSSMWPEDIGTDVGKQFNIEKPGRDQDMLEEVTTIEEPTIADFQRLMELTNYTDKGS : 74  
 GmHK05 : -----MENDSIEDMDIEALPSMWPQDIGTEVGKQFNIEKAGRDQDMLEEVTTIEEPTIVDFKRLMELTDFTEKGS : 70  
 GmHK06 : -----MYWKQRALHSEKQ--LEASIQREEILEE-----KLHERIANIERQS : 39  
 GmHK07 : LRMWNILNSTSEITTAQVKLSQYVIRRHSNPATQAEQVELYEAMRAVTWALFAS-RKALNSITINYKNGFVQAFH : 178  
 GmHK08 : LRMWNILNSTSEITTAQVKLSQYVIRRHSNPATQAEQVELYEAMRAVTWALFAS-RKALNSITINYKNGFVQAFH : 178  
 GmHK09 : LRMWNILNSTAEITTAQVKLSQYVIRKHTNFATQADQVEMYEAMRAVTWALFAG-KKALNSITVYKNGFVQAFH : 178  
 GmHK10 : QKQKHFPRGPRGTRWRKLLVIFVSLGIIGSFVLFWHLNTGIMQRREETLANMCDERARMLQDQFNVS MNHV : 182  
 GmHK11 : QKQKHFPRGPRGTRWRKLLVIFVSLGIIGSFVLFWHLNTGIMRRREETLANMCDERARMLQDQFNVS MNHV : 113  
 GmHK12 : HQQYYQYIGSKKVKRALWRK-LLLTWVVGWFIIVSLRIFCYMSSQGTEKRKETLASMCDERARMLQDQFNVS MNHI : 144  
 GmHK13 : HQQYYQYIGSKKVKRALWRK-ILLTWVVGWFIIVSLWIFSYMSLQTEKRKETLASMCDERARMLQDQFNVS MNHI : 144  
 GmHK14 : DQMGSKRKYTFIQAHRAWLPKFLLLWILLMALISWCIFYSKMDDDTKVRRKEVLGSLCDQARMLQDQFVS SVNHV : 89  
 GmHK15 : DQMGSKRKYTFIQAHRAWLPKFLMLWILLMALISWCIFYSKMDDDTKVRRKEVLGSLCDQARMLQDQFVS SVNHV : 89  
 GmHK16 : EQAGSIRKYTFIQAHRAWLPKFLMLWILLMALIGCFIFYSKMDADTKVRRKEVLGSLCDQARMLQDQFVS SVNHV : 81  
 GmHK17 : EQAGSIRKYTFIQAHRAWLPKFLMLWILLMALIGCFIFYSKMDADTKVRRKEVLGSLCDQARMLQDQFVS SVNHV : 89  
 GmERS1 : -----MMESCDCIDTQYPPDELLVYQYISDVLIAYFSIPVELIYFVKSAFFPYRWVLMQFGAFIVLCGAT : 69  
 GmERS2 : -----MMESCDCIDTQYPPDELLVYQYISDVLIAYFSIPVELIYFVKSAFFPYRWVLMQFGAFIVLCGAT : 69  
 GmETR1 : -----MESCNCIDPQVPADDLLMKYQYISDFIALAYFSIPLELIYFVKSAFFPYRWVLMQFGAFIVLCGAT : 68  
 GmETR2 : -----MESCNCIDPQVPADDLLMKYQYISDFIALAYFSIPLELIYFVKSAFFPYRWVLMQFGAFIVLCGAT : 68

CKI1 : YIAESNTSVAVFA--NSSSNSSRGD-----YTWYTQTVDQLTGRLNGNSTKSQS-- : 176  
 AHK5 : SQTNLVKQWEYM--QDNAVRLLEELKNLDRQREEAEAKELKIIIEEYKFESN----EPENVPTDSDL---- : 138  
 AHK1 : RDPASSSTFYIFS--DLKNYSISGTGPEDVSG-----WNNKSIHGNSMAIWIYQQQLDPVTGENL GKPLKIPP-- : 266  
 AHK2 : HAILVSTFHHG--KIPSAIDQRTFEEYTERTFERPLTSGVAYALKVPHSEREFKEKEHGWA KKMET----- : 355  
 AHK3 : QAMSILISTFHHG--KIPSAIDQRTFSEYDRTSFERPLTSGVAYAMRVLHSEREEFERQQGWTIRKMYS---LE : 218  
 AHK4 : HAILVSTFHYH--KNPSAIDQETFAEYARTAFERPLLSGVAYAEEKVNFEREMFERQHNWVTKTMDRG---- : 229  
 ERS1 : HFIN--LWTFMH--SKAVAVMTIAKVSCAVVSCATALMLVHIIPDLLSVKNRELFKKADELDREMG----- : 134  
 ETR1 : HFIN--LWTFTH--SRTVALVMTTAKVLTAVVSCATALMLVHIIPDLLSVKTRELFKKNKAAELDREMG----- : 134  
 OsHK1 : SQMQYFVKHWEYK--RANTARLLKEQIGLLCQQRKEIEQRKQQLILEEQFQDESYYAVKWQVPII DEVYKD---- : 138  
 OsHK2 : HVGPKLFLAFSMQPLQAQISYAAVDGAAFAYYRAGGGDGEARAMFARPNGTWFTQAVDPATGRPVGNATAAAP-- : 167  
 OsHK3 : QAILVSTFHHG--KTPSAIDQMTFARYAERTAFERPLTSGVAYAVRVTHGEREQFERQQGWA KKMYSSSNKK : 209  
 OsHK4 : HAILVATFHYD--KHPPALDQDTFAVYAARTSFERPLLSGVAYAQRVHADRESFERQQGWI KTMKH----- : 163  
 OsHK5 : HAILVSTFHHG--KNPSAIDQKTFEDFTARTTTFERPLMSGVAYALKVLHSERELFQKLGWKKKMETE---- : 365  
 OsHK6 : HAILISTFHFH--KFPSAIDQDTFAKYTARTSFERPLLSGVAYAQRIFHHEREMFENQQGWI KTMKR----- : 135  
 OsERS1 : HFIN--LWTFTH--TKTVAMVMTVAKVSTAVVSCATALMLVHIIPDLLSVKTRELFKKNKAAELDREMG----- : 134  
 OsERS2 : HFIN--LWTFIY--TKTIAVVLTVAKAATAVVSCITALMLVHIIPDLLNVKLRERFLKDKADELDREMG----- : 135  
 GmHK01 : NSSSLSTSGGAS--NLS-----IYYIQPVNRDTGELYGKAIISEVP- : 43  
 GmHK02 : SQAYLMKQWEYK--QANVRLLEELDNLKQQRQDVELRKLEILEEHRFEEERHGADKRPVSI DDVYDG---- : 139  
 GmHK03 : SQAYLMKHWEYK--QANVRLLEELDNLKQQRKEVELRKLEILKDRFEEENYGGDKRPVSI DEVYYT---- : 143  
 GmHK04 : SQAYLMQHWEYK--QANVRLLEELDNLKQQRKEVELRKLEILKDNRFEEENYGGDKRPVSI DEVYYT---- : 143  
 GmHK05 : SQAYLMKQWEYK--QASVRLLEELDNLKQQRDAELRK----- : 109  
 GmHK06 : SPVEELSQILKRA--DNFLHFILQNAVVIGHQ----- : 70  
 GmHK07 : RDKDNNTFYIYS--DLNSYMSGASNSNAVNSISKYRAWD---VRGNYSAIWIYREPLDPVSSEKIGKAMKIAP-- : 246  
 GmHK08 : RDKDNNTFYIYS--DLNSYMSGASNSNEVNSISKHRAWDDKGLHGNYSSIWIYREPLDPVSSEKIGKAMKIAP-- : 249  
 GmHK09 : RDKDNNTFYIYS--DLANYSMAASGYNEINSRSSREAWNDKDIHGHPAIWIYREPLDPISSEKIGKVRPIAP-- : 249  
 GmHK10 : HAILVSTFHHG--KHPSAIDQKIFGEYTESTAFERPLTSGVAYALKVLHSDRMHFQKQHGWTIKKMET----- : 250  
 GmHK11 : HAILVSTFHHG--KHPSAIDQKIFGEYTESTAFERPLTSGVAYALKVLHSDRMHFQKQHGWTIKKMET----- : 181  
 GmHK12 : QAMSILISTFHHA--KSPSAIDQKTFAKYTERTAFERPLTSGVAYAVRVLHSEREQFEKQQGWTIKRMDT---LE : 214  
 GmHK13 : QAMSILISTFHHA--KSPSAIDQKTFAKYTERTAFERPLTSGVAYAVRVLHSEREQFEKQQGWTIKRMDT---LE : 214  
 GmHK14 : HAILVSTFHYH--RYPASIDQETFAEYARTAFERPLLSGVAYAQRVNSEREREFKEKEHGWI KTMER----- : 157  
 GmHK15 : HAILVSTFHYH--SYPSAIDQETFAEYARTAFERPLLSGVAYAQRVNSEREREFKEKEHGWI KTMER----- : 157  
 GmHK16 : HAILVSTFHYH--RTPASIDQETFAEYARTAFERPLLSGVAYAQRVNSERETFEKQHGWI KTMER----- : 149  
 GmHK17 : HAILVSTFHYH--RTPASIDQETFAEYARTAFERPLLSGVAYAQRVNSERETFEKQHGWI KTMER----- : 157  
 GmERS1 : HFIN--LWTFSPH--SKAVAVMTIAKVSCAVVSCATALMLVHIIPDLLSVKTRELFKKNKAAELDREMG----- : 135  
 GmERS2 : HFIN--LWTFSPH--SKSVAVMTIAKVSCAVVSCATALMLVHIIPDLLSVKRRESILKNKAAELDREMG----- : 135  
 GmETR1 : HFIN--LWTFRIH--SRTVAVVMTTAKVLTAVVSCATALMLVHIIPDLLSVKTRELFKKNKAAELDREMG----- : 134  
 GmETR2 : HFIN--LWTFRIH--SRTVAVVMTTAKVLTAVVSCATALMLVHIIPDLLSVKTRELFKKNKAAELDREMG----- : 134

CKI1 : -----LDVTHTDWFQAAQSNNYTTAFVGTSLGGEDNETLIQSVVSLYSKGLVSLGFPVKTI TE---VLNSLNLH : 243  
 AHK5 : -----FRR--FRQKKRDALVDSKKIEIYEEFDTVAYWKQKALSLEKMLEASTERERRLMEKISESLKTMESQSAP : 206  
 AHK1 : -----DDLINIAGISQVPDGEASWHVTVSKYMDSPLLSAALPVFDASNKSI VAVVGVTTALYSVGQLMRDLVEVH : 336  
 AHK2 : EDQTVVQDCVPENFDPAPIQDEYAPVIFAQETVSHIVSVDMMSGEEDRENILRARASGKGVITSPFKLLKSNHLG : 430  
 AHK3 : QNPVHKDDYDLEALEPSPVQEEYAPVIFAQDTVSHVSLDMLSGKEDRENILRARSSGKGVITAPFPLIKTNRLG : 293  
 AHK4 : -----EPSPVRDEYAPVIFSQDSVSYLESIDMMSGEEDRENILRARETGKAVITSPFRLLLETHHLG : 290  
 ERS1 : -----LILTQEETGRHVRLMTHGIRRTLDRHTILRTTLVELGKTLCEECALWMPSSQGLYLQLS : 194  
 ETR1 : -----LIRTQEETGRHVRLMTHGIRRTLDRHTILRTTLVELGRTLALAECAWMPTRTGLELQLS : 194  
 OsHK1 : -----EWKR--PSKKNDDLSHNQELKIDAEYDSISYWKERAMQLEKTLEASLQREERSLEEKI EENIKNLQSHT-P : 205  
 OsHK2 : -----HQQLPPNVTRLLLDGGGGGASLADGWARPGVRMLFLSAPVGGGGGAVSAAVAVDDV VLRGAAGLRQLRD : 236  
 OsHK3 : QSSPGPGPGDAVAEIREPAEYAPVIFAQDAYKHVISFDMLSGNEEDRDNILRARKSGKGVITAPFKLLN-NRLG : 283  
 OsHK4 : -----EPSPAQDEYAPVIFSQETISYIEGLDVMMSGEDRENILRARATGKAVITRPFRLM-SNHLG : 223  
 OsHK5 : -DQSLVHDYDNEKLPSPVQDEYAPVIFSQETVKHII SVDMMSGKEDRDNILRSRATGKGVITAPFLLKSNHLG : 439  
 OsHK6 : -----QAAPPQDEYAPVIFSQDTVSYLARIDMMSGEEDRENILRARATGKAVITNPFRLLSNHLG : 196  
 OsERS1 : -----LIRTQEETGRHVRLMTHGIRRTLDRHTILRTTLVELGGTLGLEECALWMPSSRSGSSLQLS : 194  
 OsERS2 : -----IIRTQEETGRHVRLMTHGIRRTLDRHTILRTTLVELGRTLVLAECAWMPTRSGSALQLS : 195  
 GmHK01 : -----SNIINTSWFVKAVNSSLSYASLGTKWN--NDHDLFLVSSSRIKG--TQVISLGIPTTITD---FFTPV--- : 105  
 GmHK02 : -----IWQD-IPCRSDVVVENKRSEIDAEYDTVMCWKQRALHSEKQLEASIQREQILEEKI QERIANIERQSSP : 208  
 GmHK03 : -----WQDVPVPLRKSNIIVQTKRIEIDAEYDTVVYWKQRALQLEKQLEASVQREQILMDKIEESVKNLERQSSP : 213  
 GmHK04 : -----WQDVPVPLRKSNDVVQNKRIEIDAEYDTVVYWKQRALQLEKQLEASVQREQILMDKIQESVKNLERQSSP : 213  
 GmHK05 : -----KSDVV----- : 114  
 GmHK06 : ----- : -  
 GmHK07 : -----EDLINIAGLSQVPDGVASWHVAVSKFTDSPLLSAALPVWDSSNKTIMAVVGVTTALYSVGQLMRELVEMH : 316  
 GmHK08 : -----EDLINIAGLSQVPDGVASWHVAVSKFTDSPLLSAALPVWDSSNKTIMAVVGVTTALYSVGQLMRELVEMH : 319  
 GmHK09 : -----EDSINIAGLSQVPDGVASWHVAVSKFTDSPLLSAALPVWDSSNKSIEAVVGVTTALYSVGQLMKELVEKH : 319  
 GmHK10 : ENEALVQDCIPEKLDPAPIQDEYAPVIFAQETVSHIVSIDMMSGKEDHENILRARASGKGVITSPFKLLKSNHLG : 325  
 GmHK11 : ENEALVQDCIPENLDPAPIQDEYAPVIFAQETVSHIVSIDMMSGKEDRENILRARASGKGVITSPFKLLKSNHLG : 256  
 GmHK12 : QNPVHKDDYAPEALEPSPVQEEYAPVIFAQDTIAHVISVNVLSGKEDRENILRARESGKGVITAPFRLLKTNRLG : 289  
 GmHK13 : QNPVHKDDYAPEALEPSPVQEEYAPVIFAQDTIAHVISVNVLSGKEDRENILRARESGKGVITAPFRLLKTNRLG : 289  
 GmHK14 : -----KSSLVRDEYAPVIFAQETVSYLESIDMMSGEEDRENILRARATGKAVITSPFLLGSHHLG : 218  
 GmHK15 : -----KSSLVRDEYAPVIFAQQTVSYLESIDMMSGEEDRENILRARATGKAVITSPFRLLGSHHLG : 218  
 GmHK16 : -----EPSSLVRDEYAPVIFAQETLSYLESIDMMSGEEDRENILRARATGKAVITSPFNLLGSHHLG : 210  
 GmHK17 : -----EPSSLVRDEYAPVIFVQETLSYLESIDMMSGEEDRENILRARATGKAVITSPFRLLGSHHLG : 218  
 GmERS1 : -----LILTQEETGRHVRLMTHGIRRTLDRHTILRTTLVELGRTLGLEECALWMPSSRSGLNLQLS : 195  
 GmERS2 : -----LILTQEETGRHVRLMTHGIRRTLDRHTILRTTLVELGRTLGLEECALWMPSSRSGLNLQLS : 195  
 GmETR1 : -----LIRTQEETGRHVRLMTHGIRRTLDRHTILRTTLVELGRTLALAECAWMPTRTGLELQLS : 194  
 GmETR2 : -----LIRTQEETGRHVRLMTHGIRRTLDRHTILRTTLVELGRTLALAECAWMPTRTGLELQLS : 194

CKI1 : GEELYMWTKDGTVLVREGSLNDSFFIS-----NGSICFGRE----SNSLWSQCIP--ENCSSSG----- : 296  
 AHK5 : VQELTQNLKRAEGFLHFILQNAPIVMG-----HQDKDLRYLFTYNYKPSLREQDILGKTDVEIF : 265  
 AHK1 : GGHIYLTSSQEGYLLATSTDGPLLKNTS-----NGPQLMKATDSEEWVTKSGAQWLEKTYGSKRP--HVV : 398  
 AHK2 : VVLTFAVYDTSLPPDATEEQRVEATIG-----YLGASYDMPSLVEKLLHQLASKQTIADVVDYDTT : 490  
 AHK3 : VILTFVYKRDLP SNATPKERIEATNG-----YGGVFDIESLVENLLQQLASKQTIIVNVYDIT : 353  
 AHK4 : VVLTFPVYKSSLPENPTVEERIAATAG-----YLGGAFDVESLVENLLGQLAGNQAIIVVHVYDIT : 350  
 ERS1 : HTLSHKIQVGSVPIINLPIINELFN SA-----QAMHIPHSCPLAKIGPPVGRYSPPEV : 247  
 ETR1 : YTLRHQHPVEYTVPIQLPVINQVFGTS-----RAVKISPNPVARLRPVSGKYMLGEV : 247  
 OsHK1 : VEEFSGMLKRADYFLHLVLQSAPIVIA-----HQDADLRYRIFNFHPTLADEDVIGKTDYEIL : 264  
 OsHK2 : LGMYYAVAGNGGATAAPPAPPEPAAYRS-----LLGDGAAAEEMALFSSVKCTASAI DAPP : 291  
 OsHK3 : VILTYTVYKYELPAYARPHERIQA AIG-----YGGIFDIQALVEKLLKQLASQESIMVNVYDTT : 343  
 OsHK4 : VVLTFPVYLVLDLPNDTAVEDRVAATAG-----YLGGAFDVESLVENLLRQLAGNQELVNVYDVT : 283  
 OsHK5 : VVLTFTVYKYDLPPDATPEERIEATLG-----YLGASFDVPSLVERLLEQLASKQKIVVRLYDIT : 499  
 OsHK6 : VVLTFAVYRPGLAADASVEERVEATAGCLVVVVSSNQIPTNRYLGGAFDVESLVENLLSKLAGNQDIVNVYDVT : 271  
 OsERS1 : HTLRHQITVGSTVSNLPPVNVQV FSSN-----RAIIPHTSPLARIRPLAGRYVPPEV : 247  
 OsERS2 : HTIYNSAAIGSVVPIINLPIVSKVFNSN-----RVVKIPHTSPLASITADKSRYVPPEV : 248  
 GmHK01 : GANLSLVTKDGKMLV-EGIQNTRLGFS-----NDMVYFQSVNANGDQTSYDGVVSVCKDGDAAEAA----- : 163  
 GmHK02 : VEELSQILKRADNFLHFILQNAPIVIG-----HQDKELRYCFIYNHFPSLQEEDIIGKTDVEIF : 267  
 GmHK03 : VEELSQILKRADNFLHFILQNAPVIG-----HQDKELRYCFIYNHFPSLQEEDIIGKTDVEIF : 272  
 GmHK04 : VEELSQILKRADNFLHFILQNAPVIG-----HQDKELRYCFIYNHFPSLQEEDIIGKTDVEIF : 272  
 GmHK05 : -----DKELRYCFIYNHFPSLQEEDIIGKTDVEIF : 144  
 GmHK06 : -----DKELRYCFIYNHFPSLHEEDIIGKTDVEIF : 100  
 GmHK07 : SGHMYLTSQEGYLLATST SAPLLATST-----KPPKLMMAVDCEDNVIIRLGAEWLQRTYGNFPSPSHDI : 380  
 GmHK08 : SGHMYLTSQEGYLLATST SAPLLETST-----KPPKLMMAVDCEDNVIIRLGAEWLQRTYGNFPSPSHEI : 383  
 GmHK09 : SGHMYLTSQEGYLLATST NAPLLSNST-----KPPKLMMAVECQNEVIREGAQWLQKTYGNFPQSHEL : 383  
 GmHK10 : VVLTFAVYNTNLPLDATPEQRTEATVG-----YLGASYDVPSLVDKLLHQLASKQTIIVNVYDTT : 385  
 GmHK11 : VVLTFAVYNTNLPLDATLEQRIEATVG-----YLGASYDVPSLVDKLLHQLASKQTIIVNVYDTT : 316  
 GmHK12 : VILTFVYKRDLP SNTPNERIQATDG-----YGGVFDVESLVEKLLQQLASKQTVIVHVYDTT : 349  
 GmHK13 : VILTFVYKRDLP SNATPNERIQATDG-----YGGVFDVESLVEKLLQQLASKQSVIVNVYDTT : 349  
 GmHK14 : VVLTFPVYKSKLPQKPTVEERIEATAG-----YVGSFDVESLVKNLLGQLDGNQAILVNVYDIT : 278  
 GmHK15 : VVLTFPVYKSKLPQKPTVEERIEATAG-----YVGSFDVESLVKNLLGQLDGNQAILVNVYDVT : 278  
 GmHK16 : VVLTFPVYKSKLPPKPTMEERIKATAG-----YVGSFDVESLVENLLGQLAGHQAILVNVYDIT : 270  
 GmHK17 : VVLTFPVYKSKLPPKPTMEERIKATAG-----YVGSFDVESLVENLLGQLAGHQAILVNVYDIT : 278  
 GmERS1 : HTLTYHVQVGVSTVQTNPIVNEVFN SP-----RAMRIPPTCPLARIRPLVGRYVPPEV : 248  
 GmERS2 : HTLTYHVQVGVSTVQTNPIVNEVFN SP-----QAMRIPPTCPLARIRPLVGRYVPPEV : 248  
 GmETR1 : YTLRQONPVGYTVPIHLPVINQV FSSN-----RAVKISPNCPVARLRPYAGKYMPGAV : 247  
 GmETR2 : YTLRQONPVGYTVPIHLPVINQV FSSN-----RAVKISPNCPVARLRPYAGKYMPGAV : 247

CKI1 : --YEVEIKRLRYQAFCSVIEVSGVPLRYTLMFPNKGGATRIKHQA EKAKYQLIVVMI FLGFGWPVWFVWFM MQAT : 369  
 AHK5 : HGGGVKESDFKREVLEK GKASKREITFTTDLFGSKTFLIYVEPVYKAGEKIGINYMGEVTDQVVKREKMAKL : 340  
 AHK1 : HAENVKLGDRYYIDSFVNLKRLPLVGVV IIPRK FIMGKVDERAFKTLII LISASVCIFFIGVCVILILTN-GV : 472  
 AHK2 : NTSGLIKMYGSEIGDI--SEQHISSLDFGDP SRNHEMHCREFKHKLPIPWAIT--PSILVLVITFLVGYI IYEA I : 561  
 AHK3 : NHSQPI SMYGTNVSAD--GLERVSP LI FGDPLRKHEMHCREFKQKPPWPVLSMV--TSFGILVIALLVAH I IHATV : 424  
 AHK4 : NASDPLVMYGNQDEEADRSLSHESK LDFGDPFRKHKMICRYHQKAPIPLNVL T--TVPLFFAIGFLVGYI IYGAA : 423  
 ERS1 : VSVRVPLLHLSNFQGS DWSDLSGKGYAIMVLI LPTDGARKWRDHELELVEVVA-----DQVAVALSHAA ILEESM : 317  
 ETR1 : VAVRVPLLHLSNFQINDWPELSTKRYALMVLMLP SDSARQWHVHELELVEVVA-----DQVAVALSHAA ILEESM : 317  
 OsHK1 : SGEGIEEMNNVKKEVMASGKATKRE FVNTPLFGAKTFVTYIEPVFSKSGETIGVNYVAMDITDQVTRREKMA DI : 339  
 OsHK2 : KLDVHGKSDKYRFAC TNFDISGVQMGFRVVLRSAMVGVERRGG-VTMVAVACAAAAAATVACVLMARALRRAV : 365  
 OsHK3 : NES-PISMYG-DDTGS--GMCHVSVLNF G DPSRKHEMHCREFEKKPPWPWLAIT--SSFGTLVIALLTGHIFQATV : 412  
 OsHK4 : NHSNPLVMYGSEVPLGIPSPSHTYTLDFGDP L RKHQMVCRYNKLVHSWSAIT--TPSGV FVICMLVGYI IYAAW : 356  
 OsHK5 : NHTYPTKMYDSDV IAS--DDLHISNIDFGDPTRKHVMHCREFKHAPSLPWSAIM--ISSAVAIIVLLVGYI IYATL : 570  
 OsHK6 : NASEPMAMYGPQSPDGKVS L FHVSTLDFGDPFRAHEMHCREFRQKPPLPWSAIT--NPLGTFVIWMLVGYI ICAAW : 344  
 OsERS1 : AAVRVPLLHLSNFQINDWPELSAKSYAIMVLM LPSDSARKWHVHELELVEVVA-----DQVAVALSHAA ILEESM : 317  
 OsERS2 : VAIRVPLLHLSNFQINDWPELSAKSFAMVLM LPPDSAREWRPHERELVEVVA-----DQVAVALSHAA ILEESM : 318  
 GmHK01 : --SILNIQGV EYLIRCSTIDIMEIKSVYVLA VPRKG-LDHFVLDIKKKGLALLTTMIVMILIAMVSFLYINVRSL : 235  
 GmHK02 : TGAGVKEAQEFKREVLEKGLPAKREITFETELFGSKTFLIYVEPVFSKAGETIGINYMGM DITDQVRKRERMAKI : 342  
 GmHK03 : TGSGVKESQDFKREVMEKGLPAKKEITFETELFGSKTFLIYVEPVFSKAGETIGVNYMGMEITDQVRKRERMAKL : 347  
 GmHK04 : TGSGVKESQDFKREVMEKGLPAKKEITFETELFGSKTFLIYVEPVFSKAGETIGVNYMGMEITDQVRKRERMAKL : 347  
 GmHK05 : TGAGVKEAQEFKREVLEKGLPAKREITFETELFGSKTFLIYVEPVFSKAGETIGINYMGM DITDQVRKRERMAKI : 219  
 GmHK06 : TGAGVKEAQEFKREVLEKGLPAKREITFETELFGSKTFLIYVEPVFSKAGETIGINYMGM DITDQVRKRERMAKI : 175  
 GmHK07 : HVENVKLGHQRYYIDSFVNLKRLPLVGV I IIPRKYIMGQVDERAYKTLVILISASLCILVIGVCVILILTN-GV : 454  
 GmHK08 : HVENVKLGHQRYYIDSFFLNLKRLPLVGV I IIPRKYIMGQVDERAYKTLVILISASLCILVIGVCVILILTN-GV : 457  
 GmHK09 : HVENVRLGRQYYIDSFFLNLKRLPLVGV I IIPRKHIMGQADERAFKTLVILISASLCIIVIGVCVILILTN-GV : 457  
 GmHK10 : NASAPITMYGTDVADT--GLLHISSLDFGDP L RKHEMHCREFKQRPPLPWTAI N--ASVGVFVITLLLGHIFYAAI : 456  
 GmHK11 : NASAPITMYGTDVADT--GLLYISSLDFGDP L RKHEMHCREFKQRPPLPWTAI N--ASVGVFVITLLLGHIFYAAI : 387  
 GmHK12 : NRTHPIAMYGSNESGD--FFYHVSTLNF G DPFRKHEMHCREFKQKPPWPWVAIT--TSIGILVIALLVGYIFHATV : 420  
 GmHK13 : NHTHPIAMYGSNESGD--VFFHVSTLNF G DPFRKHEMHCREFKQKPPWPWVAIT--TSIGILVIALLVGHIFHATV : 420  
 GmHK14 : NYTNPLVMYGNLYEEGDMSLVHESK LDFGDPYRKHQMICRYHQKAPTNIWIAIT--TAF LFFVILFLVGYI IYGAG : 351  
 GmHK15 : NYTNPLIMYGNQYQEGDMSLAHESK LDFGDPYRKHQMICRYHQKAPTNIWIAIT--TAF LFFVILFLVGYI IYSAG : 351  
 GmHK16 : NSTNPLIMYGNQNEEGDMSLVHESK LDFGDPYRNHTMICRYHQKAPTNIWIAIT--TAF LFFVILLVGYI IYGAG : 343  
 GmHK17 : NSTDHLIMYGNQNEEGDMSLVHESK LDFGDSYRKHTMICRYHQKAPTNIWIAIT--TAF LFFVILLVGYI IYGAG : 351  
 GmERS1 : VAVRVPLLHLSNFQINDWPDMSAKSYAIMVLI LPTDSVRKWRDHELELVDVVA-----DQVAVALSHAA ILEESM : 318  
 GmERS2 : VAVRVPLLHLSNFQINDWPDISAKSYAIMVLI LPTDSVRKWRDHELELVDVVA-----DQVAVALSHAA ILEESM : 318  
 GmETR1 : VAVRVPLLHLSNFQIYDWPEVSTRSYALMVLMLP SDSARQWHVHELELVEVVA-----DQVAVALSHAA ILEESM : 317  
 GmETR2 : VAVRVPLLHLSNFQIYDWPEVSTRSYALMVLMLP SDSARQWHVHELELVEVVA-----DQVAVALSHAA ILEESM : 317

CKI1 : REMHMRATLINQMEATQQAERKSMNKSOAFANASHDIRGALAGMKG-----LIDICRDGVKPGSDVDT : 433  
 AHK5 : REDNAV RKAMESELNKTIHITEETMRAKQMLATMSHEIRSPLSGVV-----GMAEILSTTKLDKEQRQ : 403  
 AHK1 : SKEMKLRAELIRQLDARRRAEASSNYKSQFLANMSHELRTPMMAAVIG-----LLDILISDDCLSNEQYA : 536  
 AHK2 : NRIATVEEDCQKMRELKARAEAADIAKSQFLATVSHEIRTPMNGVL-----GMLKMLMDTDLDAKQMD : 624  
 AHK3 : SRIHKVEEDCDKMKQLKKKAEAADVAKSQFLATVSHEIRTPMNGVL-----GMLHMLMDTELDTVQD : 487  
 AHK4 : MHIVKVEDDFHEMQELKVRAEAADVAKSQFLATVSHEIRTPMNGIL-----GMLAMLDTLSTSTORD : 486  
 ERS1 : HARDQLMEQNFALDKARQEAEMAVHARNDFLAVMNHEMRTPMHAIIS-----LSSLLLETELSPQRV : 380  
 ETR1 : RARDLLMEQNVALLDLARREAEATAIRARNDFLAVMNHEMRTPMHAIIA-----LSSLLQETELTPEQRL : 380  
 OsHK1 : RVREAVQKAKETELSKSLHITEETMRAKQMLATMSHEIRSPLSGVV-----SMAEILATTKLDKEQYQ : 402  
 OsHK2 : AREAALGADLARHRDALRQAERKSMNKSNAFASASHDIRSALAAVAG-----LVEVSRPEANPNIVD : 427  
 OsHK3 : HRIAKVEDDFHKMSELKKRAEDADVAKSQFLATVSHEIRTPMNGVL-----GMLQMLMDTDLDTTQD : 475  
 OsHK4 : SRYDNV KEDCRKMEALKKRAEAADIAKSQFLATVSHEIRTPMNGVL-----GMLDMLDTLSTSTORD : 419  
 OsHK5 : NSLEEAEDNYTTMRDLKGRAEAADVAKSQFLATVSHEIRTPMNGVL-----GMLQMLMDTELDTTQD : 633  
 OsHK6 : SRYDKVSEDCKRMEELKTQAEAADVAKSQFLATVSHEIRTPMNGVLVVQRSKILPFDVGMMLDMLGTDLSMTQKD : 419  
 OsERS1 : RARDLLMEQNVALLDLARREAEEMAIARARNDFLAVMNHEMRTPMNAIIA-----LSSLLLETELTPQRL : 380  
 OsERS2 : RARDLLMEQNVIALDAARREAEEMAIARARNDFLAVMNHEMRTPMRAIVS-----LSSLLLETNLSAEQRL : 381  
 GmHK01 : REMHLCWSLIKQNEATQQAERKCMNKSLAFASASHDVRASLAGLGT-----LIEMSFHEVSPDSELGT : 299  
 GmHK02 : REEIAVQKAKETELNKTIHITEETMRAKQMLATMSHEIRSPLSGVV-----SMAEILSNTKLDWEQRQ : 405  
 GmHK03 : REEIAVQKAKETELNKTIHITEETMRAKQMLATMSHEIRSPLSGVV-----SMAEILSTTKLDREQRQ : 410  
 GmHK04 : REDIAVQKAKETELNKTIHITEETMRAKQMLATMSHEIRSPLSGVV-----SMAEILSTTKLDREQRQ : 410  
 GmHK05 : REEIAVQKAKETELNKTIQITEETMRAKQMLATMSHEIRSPLSGVV-----SMAEILSNTKLDWEQRQ : 282  
 GmHK06 : REEIAVQKAKETELNKTIHITEETMRAKQMLATMSHEIRSPLSGVV-----SMAEILSNTKLDWEQRQ : 238  
 GmHK07 : SKEMNLRAELINQLEARRKAEASSNYKSQFLANMSHELRTPMMAAVIG-----LLDILISDDCLTNEQYS : 518  
 GmHK08 : SKEMNLRAELINQLEARRKAEASSNYKSQFLANMSHELRTPMMAAVIG-----LLDILISDDCLTNEQYS : 521  
 GmHK09 : SKEMKLRAELISHLEARRKAEASSNYKSQFLANMSHELRTPMMAAVIG-----LLDILISDDCLTNEQCA : 521  
 GmHK10 : NRIAKVEADYRQRELKVRAEAADVAKSQFLATVSHEIRTPMNGVL-----GMLQMLMDTEL DENQMD : 519  
 GmHK11 : NRIAKVEDDYRQRELKVRAEAADVAKSQFLATVSHEIRTPMNGVL-----GMLQMLMDTEL DENQMD : 450  
 GmHK12 : NRIAKVEDDYREMMELKKRAEAADVAKSQFLATVSHEIRTPMNGVL-----GMLHMLMDTDLDTVQD : 483  
 GmHK13 : NRIAEVEDDYRKEMELKKQAEAADVAKSQFLATVSHEIRTPMNGVL-----GMLHMLMDTDLDTVQD : 483  
 GmHK14 : NHIVKVEDDFHAMEELKVRAEAADIAKSQFLATVSHEIRTPMNGIL-----GMLALLLDTELSTSTORD : 414  
 GmHK15 : NHIVKVEDDFHEMQELKVRAEAADVAKSQFLATVSHEIRTPMNGIL-----GMLALLLDTELSTSTORD : 414  
 GmHK16 : NHIVKVEDDFHQMEELKVRAEAADVAKSQFLATVSHEIRTPMNGIL-----GMLGLLLKTELSTSTORD : 406  
 GmHK17 : NHIVKVEDDFHQMEELKVRAEAAHVAKSQFLATVSHEIRTPMNGIL-----GMLGLLLKTELSTSTORD : 414  
 GmERS1 : RARDQLLEQNVALLDLARQEAEMAIHARNDFLAVMNHEMRTPMHAIIA-----LSSLLLETELTPQRL : 381  
 GmERS2 : RARDQLMEQNVALLDLARREAEEMAIHARNDFLAVMNHEMRTPMHAIIA-----LSSLLLETELTPQRL : 381  
 GmETR1 : RARDQLMEQNVALLDLARREAEATAIRARNDFLAVMNHEMRTPMHAVIA-----LSSLLQETDLTAEQRL : 380  
 GmETR2 : RARDQLIEQNVALLDLARREAEATAIRARNDFLAVMNHEMRTPMHAVIA-----LSSLLQETDLTAEQRL : 380

CKI1 : TLNQVNVCAKDLVALLNSVLDMSKIESGKMQLVEEDFNLSKLLLEDVDFYHPVAMKKGVDVLDPHDGSVFKFSN : 508  
 AHK5 : LLNVMISSGDLVLQIINDILDLSKVESGVMKLEATKFRPREVVKHVLQTAAAS-LKKSLTLEGNVADD---VPPIE : 474  
 AHK1 : TVTQIRKCASTALLRLLNILDLSKVESGKLVLEAEFDLGRELEGLVDMFVQCINHNVETVLDLSD---MPAL : 608  
 AHK2 : YAQTAHSGKDLTSLINEVLDQAKIESGRLELENVDFMRFDLNDVSSLLSGKANEGIELAVYVSSQ---VPDV : 696  
 AHK3 : YVRTAQASGKALVSLINEVLDQAKIESGKLELEEVRFDLRGLDDVLSLFSSKSQKGVELAVYISDR---VPDM : 559  
 AHK4 : YAQTAQVCGKALIALINEVLDRAKIEAGKLELESVPFDLRSILDDVLSLFSEESRNKSIELAVFVSDK---VPEI : 558  
 ERS1 : MIETILKSSNVLATLINDVLDLSRLEDGSLLEENEPFSLQAFEEVVISLIKPIASVKKLSTNLIISAD---LPTY : 452  
 ETR1 : MVETILKSSNLLATLINDVLDLSRLEDGSLQLELGTFLNHLTFREVLNLIKPIAVVKLPTLNLAPD---LPEF : 452  
 OsHK1 : LLEVMLSSGDLVLQIINDILDLSKVESGAMKLEATTFRPREVVKHVLQTAAAS-LKKELILEGCI GDN---VPLE : 473  
 OsHK2 : NLNQMELCTNKLLDILNSILDSTTKVESGKVQLEVEFNMADVLEESVDMANVVGITKGI EVIWPCDFSVMKCDN : 502  
 OsHK3 : YVRTAQASGKALVSLINEVLDQAKIESGKLELETVPFDLRVTCCDLSLFSCGKAQKGVELAVYVSDQ---VPQI : 547  
 OsHK4 : YAQTAQVCGKALISLINEVLDRAKIEAGKIDLESVPFDLRSILDDVLSLFSSKSREKGI EAVYVSER---VPEI : 491  
 OsHK5 : FVVTAQESGKSLINLINEVLDLAKIESGKIELEAVRFDVRDILDNVVSLFSEKSWAKGI EAVLVSDQ---VPDV : 705  
 OsHK6 : YAQTAQMCGRALITLINDVLDRAKIEAGKLELEAVPFDLRSLMDDVLSLFSSKSREKGI EAVFVCCD---VPKV : 491  
 OsERS1 : MVETVLKSSNLLATLINDVLDLSKLEDGSLLEIKAFNLHAFKEMVSFIKPIAAIKRLSVSVM LAPD---LPLC : 452  
 OsERS2 : MVETILKSSDLATLINDVLDVSKLENGSLELEIAPFNLHSTFTDVNLIKPVAAKRLSVMVTLAPE---LPLH : 453  
 GmHK01 : NLRQMDSCTKDLLGLNSILDASKVEAGKMLLEEEFDVFLLEDVVDLYHSVAMKKGVDIVLDPCNGSVLRYSR : 374  
 GmHK02 : LLDVMLSSGDLVLQIINDILDLSKVESGVMKLEATKFRPREVVRHVLQTAAAS-LQKILTLEGNVADD---VPPIE : 476  
 GmHK03 : LLNVMISSGDLVLQIINDILDLSKVESGVMKLEATKFRPREVVKHVLQTAAAS-LQKILTLEGNVADD---MPIE : 481  
 GmHK04 : LLNVMISSGDLVLQIINDILDLSKVESGVMKLEATKFRPREVVKHVLQTAAAS-LQKILTLEGNVADD---IPVE : 481  
 GmHK05 : LLDVMLSSGDLVLQIINDILDLSKVESGVMKLEATKFRPREVVKHVLQTAVVS-LQKILTLEGNVADD---VPPIE : 353  
 GmHK06 : LLDVMLSSGDLVLQIINDILDLSKVESGVMKLEATKFRPREVVKHVLQTAVVS-LQKILTLEGNVADD---VPPIE : 309  
 GmHK07 : TVTQIRKCASTALLRLLNILDLSKVESGKLVLEDAEFDLGRELEGLVDMFVQCINHNVETVLDLSD---MPKL : 590  
 GmHK08 : TVTQIRKCASTALLRLLNILDLSKVESGKLVLEDAEFDLGRELEGLVDMFVQCINHNVETVLDLSD---MPKV : 593  
 GmHK09 : TVTQIRKCASTALLRLLNILDLSKVESGKLVLEDAEFDLGRELEGLVDMFVQCINHNVETVLDLSD---MPKL : 593  
 GmHK10 : CAQTAHSGKDLISVISEVLDQAKIEAGKLELEAVAFDPRAILDEVLSLFSEKSNEKGI EAVYASNQ---VPKV : 591  
 GmHK11 : CAQTAHSGKDLISVISEVLDQAKIEAGKLELEAVAFDPRAILDEILSLFSEKSNEKGI EAVYASNQ---VPKV : 522  
 GmHK12 : YVRTAQESGKALVSLINEVLDQAKIEFGKLELEAVLFDIRAILDDVLSLFSEKSQKGVELAVYVSDH---VPEL : 555  
 GmHK13 : YVRTAQESGKALVSLINEVLDQAKIEFGKLELEAVLFDIRAILDDVLSLFSEKSQKGVELAVYVSDH---VPEL : 555  
 GmHK14 : YAQTAQACGKALITLINEVLDRAKIEAGKLELEAVPFDLRSIIDDVLSLFSEKSRHKGLEAVFVSDK---VPDI : 486  
 GmHK15 : YAQTAQACGKALITLINEVLDRAKIEAGKLELEAVPFDLRSIIDDVLSLFSEKSRHKGLEAVFVSDK---VPDI : 486  
 GmHK16 : YAQTAQACGKALIALINEVLDRAKIEAGKLELEAVPFDIRSILDDVLSLFSEKSRNKGLEAVFVSDK---VPDI : 478  
 GmHK17 : YAQTAQACGKALIALINEVLDRAKIEAGKLELEAVPFDIRSILDDVLSLFSEKSRNKGLEAVFVSDK---VPDI : 486  
 GmERS1 : MIETVLKSSNVLATLINDVLDLSRLEDGSLLEKGFNLHGVGEIVELIKPIASVKKLPTLILSPD---LPTH : 453  
 GmERS2 : MIETVLKSSNVLATLINDVLDLSRLEDGSLLEMGKFNHGVGEIVELIKPIASVKKLPTLILSPD---LPTH : 453  
 GmETR1 : MVETILKSSNLLATLINDVLDLSRLEDGSLQLEAATFNLHSLFREVLNLIKPVASVKKLSLTSHV ASD---LPMY : 452  
 GmETR2 : MVETILKSSNLLATLINDVLDLSRLEDGSLQLEAATFNLHSLFREVLNLIKPVASVKKLSLTSHV ASD---LPMY : 452

CKI1 : VRGDSGRLLKQIILNVLVSNVAVKFT-----VDGHIIVRAWAQRPGSNS-----SVVLASYPKGV----- : 561  
 AHK5 : VVGDLRIRQIILTNLISNAIKFT-----HEGNVGIKLVISEPS-----FVRDNALNADTE----- : 525  
 AHK1 : VRGDSARLVQIFANLISNSIKFT-----TTGHIILRGWCENINSLH-----DEMSVSVDRRKP----- : 661  
 AHK2 : VVGDPFRFRQIITNLVGNVSIKFTQ-----ERGHIFISVHLADEVKE-----PLTIEDAVLKQRLA-----L : 752  
 AHK3 : LIGDPGRFRQIILTNLMGNSIKFT-----EKGHIFVTVHLVDELFE-----SIDGETASSPE----- : 610  
 AHK4 : VKGDSGRFRQIILNVLVGNVSVK-----FTEKGHIFVVKVHLAEQSKD-----ESEPKNALNGGVS---EEM : 614  
 ERS1 : AIGDEKRLMQIILNIMGNVAVKFT-----KEGYISIIASIMKPESLQ-----ELPSPEFFPVLS----- : 505  
 ETR1 : VVGDEKRLMQIILNIVGNVAVKFS-----KQGSISVTALVTKS-----DTRAADFFVVP----- : 501  
 OsHK1 : VTGDVLRIRQIILTNLISNAIKFT-----HEGKVGINLHVLDKQLPGCRIEGGQLHSHKASAPAAAA----- : 534  
 OsHK2 : IIGDSKRFRQIILDNLLGNAMKFT-----QEGHVILRAWANRPIARG-----SIGAPSRFAYRS----- : 555  
 OsHK3 : LIGDPGRFRQIITNLVGNVSIKFT-----ERGHIIYLVHVVVEEVMS-----CLEVETGIQNT----- : 598  
 OsHK4 : LLGDPGRFRQIITNLVGNVSIKIFITLSQFTERGHIFVQVHLADHSNL-----ATEAKIEPVVNGMNGHKDEA : 559  
 OsHK5 : LIGDPWRFRQIITNLVGNVSMKFT-----EQGHIFIRVHLIEEVKR-----KMEALDDTSPENIEVT---- : 761  
 OsHK6 : VIGDPWRFRQIILTNLGNVAVK-----FTERGHVVFVRVCLAENS-----KVEANQVLNGTMNGKDGK : 547  
 OsERS1 : AIGDEKRLMQIILNIVGNVAVKFT-----KEGHITLVASVVKADSLR-----EFRTPDFHPTAS----- : 505  
 OsERS2 : AIGDQKRLMQIILNVAGNSIKFT-----KEGHVSITASMARPDALR-----GPHEPDYHPVVS----- : 506  
 GmHK01 : TKGDRGKLLKQVLCNLLISNAIKFT-----EEGHIIVRAWAQKPSLQ-----SSMIATHQYGSS----- : 426  
 GmHK02 : VIGDLRMRQIILTNLISNAIKFT-----HEGKVGINLYVVEVSEPT-----FAKAECIQKMTS----- : 527  
 GmHK03 : VIGDLRIRQIILTNLISNAIKFT-----HEGKVGINLYVVEPEPP-----FAKAEGHQKMIT----- : 532  
 GmHK04 : VIGDLRIRQIILTNLISNAIKFT-----HEGKVGINLYVVEPEPP-----FAKAEGHQKMIT----- : 532  
 GmHK05 : VIGDLRMRQIILTNLISNAIKFT-----HEGRVGINLYVVPKPN-----FAKAEDIQMMTP----- : 404  
 GmHK06 : VIGDLRMRQIILTNLISNAIKFT-----HEGRVGINLYVVPKPN-----FAKAEDIQMMTP----- : 360  
 GmHK07 : VKGDSARVVQIFANLINSIKFT-----PSGHIILRGWCENPNSSI-----GSPNFPLDQKKS----- : 643  
 GmHK08 : VRGDSARVVQIFANLINSIKFT-----PSGHIILRGWCENQNSYV-----GSP---LDQKKS----- : 643  
 GmHK09 : VRGDSARVVQIFANLINSIKFT-----LSGHIVLRGWENPNSSCS-----DNTNFPLEQKKL----- : 646  
 GmHK10 : VIGDKRFRQIITNLVGNVSLKFTTH-----DKGHVFSVHVLASEVKN-----PLHIMDAVLRGLN-----L : 647  
 GmHK11 : VIGDKRFRQIITNLVGNVSLKFTTH-----DKGHVFSVHVLANEVKN-----PLHIMDAVLRGLN-----L : 578  
 GmHK12 : LIGDPGRFRQIITNLVGNVSIKFT-----DKGHIFVTIHLVEEVVR-----SIEVDKESNSE----- : 606  
 GmHK13 : LIGDPGRFRQIITNLVGNVSIKFT-----DKGHIFVTIHLVEEVVR-----SIEVDKESNSE----- : 606  
 GmHK14 : VMGDPGRFRQIITNLVGNVSVK-----FTEQGHIFVVKVHLADNRKS-----IMNGKHDTFLNGES---DEV : 543  
 GmHK15 : VMGDPGRFRQIITNLVGNVSVK-----FTEQGHIFVVKVHLADNRKS-----MMNGKHDTFLNGES---DEV : 543  
 GmHK16 : VMGDPGRFRQIVTNLGNVSVK-----FTERGHIFVVKVHLSSENSMS-----TMNGKTEKFINRGS---GEP : 535  
 GmHK17 : VMGDPGRFRQIVTNLGNVSVK-----FTERGHVVFVKVHLSENRMS-----TMNGKIEKFLNGGL---DEP : 543  
 GmERS1 : AIGDEKRLTQTLNVLVGNVAVKFT-----KEGYVSIRVSVAKPESLQ-----DWRPPEFYPPASS----- : 506  
 GmERS2 : AIGDEKRLTQTLNVLVGNVAVKFT-----KEGYVSVRVSVAKPESSQ-----DWRPPEFYPPASS----- : 506  
 GmETR1 : AIGDEKRLMQIILNVLVGNVAVKFS-----KEGCISISAFVAKPESFR-----DARIPDFLPVLS----- : 505  
 GmETR2 : AIGDEKRLMQIILNVLVGNVAVKFS-----KEGCISITAFVAKPESFR-----DARIPDFLPVPS----- : 505

CKI1 : -----KFVKSMFCKNKEESSTYETEIS-----NSIRNNANTMEFVFEVDDTG : 603  
 AHK5 : -----EHEQ-----NGLTETSVMCCDVWDTG : 547  
 AHK1 : -----WAPMKTQVQHRNHLQKSKN-----ANKMVLWFEVDDTG : 696  
 AHK2 : GCSESG---ETVSGFPAVNAWGSWKNFKTCY-----STESQNSDQIKLLVTVEDTG : 800  
 AHK3 : -----STLSGLPVADRQRSWENFKAFSSNGHR-----SFE-PSPPDINLIVSVEDTG : 656  
 AHK4 : IVVSKQSSYNTLSGYEAADGRNSWDSFKHLVSEEQ-----SLSEFDISSNRLMVSIEDTG : 670  
 ERS1 : -----DSHFYLCVQVKDTG : 519  
 ETR1 : -----GSHFYLRVKVKDSG : 515  
 OsHK1 : -----EHFSASPRKCDNDTLGCSNHEDACQTG-----IPSNDNFGEHHEGDEVWLRCDVYDTG : 588  
 OsHK2 : -----LENNFFSFFFGAKEDRVSNQNSFN-----PLQNDPNSVEFYFEVVDTG : 597  
 OsHK3 : -----NTLSGYPVANRRCSWESIRLFNRELHSSSE-----KSFAPIASDSISLIVSVEDTG : 648  
 OsHK4 : IAIPITSGSHNTLSGFEEAADSRNNWENFKLLLSYEK-----NEMPYESDSDKVTLLVSVEDTG : 616  
 OsHK5 : ANSKNTMPYNTLSGLEVANRRKTLESFRMFK-----DSSDAIDSVNLLVTVEDTG : 811  
 OsHK6 : VETTANGAFNTLSGFQAADERNNDYFKLLLSDKEPHMDLE-----CDRSYQNDCDCVTLMISIEDTG : 611  
 OsERS1 : -----DDNFYLRVQVKDTG : 519  
 OsERS2 : -----DGFFYLAVQVCS--- : 518  
 GmHK01 : -----RLLSRLCCRQNEARDDVEDLN-----IQQDPNCMDFTIEVDDTG : 465  
 GmHK02 : -----SHST-----ISVN-----AETTVWIRCDVYDTG : 550  
 GmHK03 : -----EQSTNSANGVKEEKRASTPRSSSDQNCLDV-----KSECSMNGDTEEQTHSTETVWIRCDVYDTG : 592  
 GmHK04 : -----EQSTNSANGVKEEKRASTPRSNDDQNCLDVNDECSSVKSECSINGDTEEQTHSTETVWIRCDVYDTG : 600  
 GmHK05 : -----NQST-----MSVNDTEEQPYSAETTVWIRCDVYDTG : 435  
 GmHK06 : -----NQST-----MSVNDTEEQPYSAETTVWIRCDVYDTG : 391  
 GmHK07 : -----RSLQKCRERPANAHAKRTSIK-----DKKVILWFEVDDTG : 678  
 GmHK08 : -----RSLQKCIERPANAHAKRTSVK-----DNKVILWFEVDDTG : 678  
 GmHK09 : -----RCSQKTRAKQHENHAKRTSNR-----DNKMILWFEVDDTG : 681  
 GmHK10 : SQDITNRTYDITLSGFPPVCNRWKS WANFKLS-----GTN---EPEIIQLLVIVEDTG : 696  
 GmHK11 : NQDISNRTYDITLSGFPPVCNRWKS WANFKLS-----GIN---EPEIIQLLVIVEDTG : 627  
 GmHK12 : -----NTLSGSPVADSRRSWEGFKAFSQEGPLG-----SFSSPSNDLVNLIIVSVEDTG : 654  
 GmHK13 : -----NTLSGSPVADSRRSWEGFKAFSQEGPLG-----SFSSPSNDLVNLIIVSVEDTG : 654  
 GmHK14 : FHISGDYHFKTLSGCEAADERNNSWDFKHLIADEEYGLDSSR-----ETMAACESSEQVTLRVCVEDTG : 607  
 GmHK15 : FYISGDYHFKTLSGCEAADERNNSWDFKHLIADEEYGLDSSR-----ETMAACESSEQVTLRVCVEDTG : 607  
 GmHK16 : VHMSGAYNSKTLSGYEAADERNNSWDFKHLIADEEFFFDAS-----VKKAASESYEQVTLMVSVEDTG : 598  
 GmHK17 : VHMSGGYNSKTLSGYEAADERNNSWDFKHLIADEEFFFDAS-----VKRVAASESYEQVTLMVSVEDTG : 606  
 GmERS1 : -----DGHFYLRVQVKDSG : 520  
 GmERS2 : -----DGHFYLRVQVKDSG : 520  
 GmETR1 : -----DNHFYLRVQVKDSG : 519  
 GmETR2 : -----DNHFYLRVQVKDSG : 519

CKI1 : KGIPMEMRKS VFENYVQVR-ETAQGHQGTGLGIGIVQSLVRLMGGELRITDKAMGEKGTCFQFNVLTTLESPPV : 677  
 AHK5 : IGIPENALPCLFKKYMCASADHARKYGGTGLGLAICKQLVELMGGQLTVTSRVS--EGSTFTFILPYKVGSRDDY : 620  
 AHK1 : CGIDPSKWDSVFESFEQADPSTTRTHGGTGLGLCIVRNLVNKMGGELKVVQKNG--LGTLMRLYLILSTP-DTVD : 768  
 AHK2 : VGIPVDAQGRIFTFPMQADSSTSRTYGGTGIGLSISKRLVELMQGEMGFVSEPG--IGSTFSFTGVFGKAETNTS : 873  
 AHK3 : VGIPVEAQSRIFTFPMQVGPSISRTHGGTGLGLSISKCLVGLMKGEIGFSSTPK--VGSTFTTAVFSNGMQPAE : 729  
 AHK4 : IGIPLVAQGRVFMFPMQADSSTSRNYGGTGIGLSISKCLVELMGGQINFISRPH--IGSTFWFTAVLEKCDKCSA : 743  
 ERS1 : CGIHTQDIPLLFTKFVQPRGTQRNHSGGGLGLAICKRFVGLMGGYMWIESEGL----- : 573  
 ETR1 : AGINPQDIPKIFTKFACTQSLATRSSGGSGGLGLAICKRFVNLMEGNIWIESEDGL----- : 569  
 OsHK1 : IGIPKESLPLLFKRYMCASDDHARKYGGTGLGLAICKQLVELMGGTLTVVSKEN--EGSTFSFVLPCKIPVKEDH : 661  
 OsHK2 : IGIPKEKRESVFENYVQVK---EGHGGTGLGIGIVQSFVRLMGGELSIKEKEPGERGTFCGFNVLLKTSGNQAA : 668  
 OsHK3 : VGIPFEAQSRVFTPFMQVGPSIARIHGGTGLGLSISKCLVGLMKGEIGFASKPH--VGSTFTTAVLMRAHCKGN : 721  
 OsHK4 : IGIPLHAQGRVFTPFMQADSSTSRNYGGTGIGLSISKCLVEIMGGQINFVSRPL--VGSTFTTAVLRRCDK-NA : 688  
 OsHK5 : IGITKDAQTRIFTFPMQADGSTSRTYGGTGIGLSITKRLVELMGGELIGFVSKPG--VSSTFSFTAIFKENRK--D : 882  
 OsHK6 : VGIPLHAQDRVFTPFMQADSSTSRNYGGTGIGLSISKCLAEIMGGQISFTSRPF--VGSTFTTAVLKRSC-DT : 683  
 OsERS1 : CGISPQDLPOVFTKFAQSQPGNGRYSGSGLGLAICKRFVTLMGGHIWLDSEGT----- : 573  
 OsERS2 : ----- : -  
 GmHK01 : KGIPKEKHKS VFENYVQVK-ETTLGQEGTGLGIGIVQSLVRLMHGDIEMDKDIGEKGTCFRNVLLTAHETQMN : 539  
 GmHK02 : IGIPEDAIPTLFKRYMCVSADHARKYGGTGLGLAICKQLVELMGGQLTVSSKEH--YGSTFTFILPYKVSACDH : 623  
 GmHK03 : IGIPKAIPTLFRRYMCVSADHARKYGGTGLGLAICKQLVELMGGRLTVTSKEH--VGSTFTFILPYKVSTACDD : 665  
 GmHK04 : IGIPKAIPTLFRRYMCVSADHARKYGGTGLGLAICKQLVELMGGRLTVTSKEH--CGSTFTFILPYKVSTVCD : 673  
 GmHK05 : IGIPEDAIPTLFKRYMCVSADHARKYGGTGLGLAICKQLVELMGGQLTVSSKEH--YGSTFTFILPYKVSACDH : 508  
 GmHK06 : IGIPEDAIPTLFKRYMCVSADHARKYGGTGLGLAICKQLVELMGGQLTVSSKEH--YGSTFTFILPYKVSACDH : 464  
 GmHK07 : CGIDPSKWDSVFESFEQADPSTTRLHGGTGLGLCIVRNLVNKMGGDIRVVKKEG--SGTLMRLCLLLSEPMDVTE : 751  
 GmHK08 : CGIDPSKWDSVFESFEQADPSTTRLHGGTGLGLCIVRNLVNKMGGDIRVVKKEG--SGTLMRLCLLLSAPMDVTE : 751  
 GmHK09 : CGIDPSKWESVFESFEQADPSTTRLHGGTGLGLCIVRTLNVNKMGGELKVVKKEG--SGTLMRLCLRLSAPVDATE : 754  
 GmHK10 : IGIPDAQSRIFTFPMQADSSTSRTYGGTGIGLSISRCLVDMGGELIGFVSEPG--IGSTFSFTGTFRKGES-TS : 768  
 GmHK11 : IGIPDAQSRIFTFPMQADSSTSRTYGGTGIGLSISKCLVDMGGELIGFVSEPG--IGSTFSFTGTFRKGES-TS : 699  
 GmHK12 : EGIPLESQPLIFTFPMQVSSISRKHGGTGIGLSISKCLVGLMNGELIGFVSIPK--IGSTFTTAVFTNGHRSS : 727  
 GmHK13 : EGIPLESQPLIYTFPMQVGPSISRKHGGTGIGLSISKCLVGLMNGELIGFVSIPK--TGSTFTTAVFTNGHCSSN : 727  
 GmHK14 : IGIPFSAQDRIFMPFVQADSSTSRNYGGTGIGLSISKCLVELMGGQINFISRPO--VGSTFSFTAVCEAFKK-SS : 679  
 GmHK15 : IGIPFSAQDRIFMPFVQADSSTSRNYGGTGIGLSISKCLVELMGGQINFISRPO--VGSTFSFTAVCGAFKK-SS : 679  
 GmHK16 : IGIPFSAQDRIFMPFVQADSSTSRHYGGTGIGLSISKCLVELMGGELISFISQLQ--VGSTFSFTAGFGTIEK-NA : 670  
 GmHK17 : IGIPFSAQDRIFMPFVQADSSTSRHYGGTGIGLSISKCLVELMGGELISFISQPQ--VGSTFSFTADFGTIKK-NA : 678  
 GmERS1 : CGIPPEIPIHLFTKFAQSRSGPARPSSGAGLGLAICKRFVNLMEGHIWIESEGP----- : 574  
 GmERS2 : CGILPQDIPHLFTKFAQSRSGPARPSSGAGLGLAICKRFVNLMEGHIWIESEGL----- : 574  
 GmETR1 : SGINPQDIPKIFTKFAQNQSLTTRNPAGSGLGLAICRRFVNLMEGHIWVESEGI----- : 573  
 GmETR2 : SGINPQDIPKIFTKFAQNQSLT-RNPAGSGLGLAICRRFVNLMEGHIWVESEGI----- : 572

CKI1 : SDMKVRQEI EAGGDYVSTPNLGLTINTSLGGSMNIRNLSPRFNNCLSSSPKQEGSRVLLLLKNEERRRVI EKYIK : 752  
 AHK5 : SDDQDEFSD-----MADQOSEPDDTAEGYFQFKP-LLGSIY : 655  
 AHK1 : QNIQP-----DFSKYGLVVMLSMYGSTARMITSKWLR : 800  
 AHK2 : ITKLER-----FDLAIQEFTGLRALVIDNRNIRAEVTRYELR : 910  
 AHK3 : -----RKNDN-----NQPIFSEFRGMKAVVDHRPARAKVSWYHFQ : 765  
 AHK4 : INHMKKPN-----VEHLPSTFKGMKAILVDAKPVRAAVTRYHMK : 782  
 ERS1 : -----EKGCTASFII : 583  
 ETR1 : -----GKGCTAIFDV : 579  
 OsHK1 : SDDPDDMP-----SSGGDFTTSDIEGSFIFKPQARPYLL : 695  
 OsHK2 : EEDIEEGPSTVSELDIR-----ASVFRETNCFKGWHCILFVHGDETRRLVQAWME : 718  
 OsHK3 : -----DIKSSEFKGINALVVDHRPVRAKVTKYHLQ : 751  
 OsHK4 : ISDSKTVA-----LHPLPSSFKGLSALLVDKRPVRATVTKYHLQ : 727  
 OsHK5 : PGDIKRYCP-----EPTPPDFQGMRALVVDGRCARAEVTMYHLR : 921  
 OsHK6 : SSSDKRSL-----SEALPTAFKGMKAILVVDGRPVGAVTRYHLN : 722  
 OsERS1 : -----GRGCTVTFVI : 583  
 OsERS2 : ----- : -  
 GmHK01 : DDTRD---DQAGSGNKNQSHGLTMSPKLS-----IWTRSPRSEASRVLLLIQNEERRGTQRFME : 596  
 GmHK02 : SDDLDELSD-----VENNDAASDDTIESFFQFQPRTLGSLF : 659  
 GmHK03 : SDDPDELS-----DVDDNDDDTTEGFFQFQPRTLGSLF : 698  
 GmHK04 : SDDPDELS-----DVDDNDDDTTEGFFQFQPRTLGSLF : 706  
 GmHK05 : SDDPDELS-----LENNDVASDDTIESFFQFQPRTLGSLF : 544  
 GmHK06 : -----NNDVASDDTIESFFQFQPRTLGSLF : 489  
 GmHK07 : QQCAV-----DLTDNGLVLLALHGNMSRLITSKWLQ : 783  
 GmHK08 : QQCAV-----DLTDNGLVLLALHGNMGRITSKWLQ : 783  
 GmHK09 : QHCQV-----DFANKGLVLLALHGNMGRSATSJKWLQ : 786  
 GmHK10 : LDAMRQ-----NNHFGSEFQELRTLVDVDRRKIRAEVTKYHLQ : 805  
 GmHK11 : LDAMQQ-----NNHFGSEFQGLRTLVDVDRKIRAEVTRYHLQ : 736  
 GmHK12 : ECKIQQINNQ-----PQSASSEFEGMTALIIDPRSVRAEVSGYHIQ : 768  
 GmHK13 : ECKVQQINNQ-----PHSASSEFEGMTALIIDPRSVRAKVSRYHIQ : 768  
 GmHK14 : VTN-KKKN-----LEDLPSFRGMKVIIVDGKPVRAAVTRYHLK : 717  
 GmHK15 : VTD-KKEN-----LEDLPSNFRGMKVIIVDGKPVRAAVTRYHLK : 717  
 GmHK16 : ITDMKKHN-----LEDLPSNFRGLKAIIVDGKPVRAAVTRYHLK : 709  
 GmHK17 : ITDMKKHN-----LEDLPSNFRGLKAIIVDGKPVRAAVTRYHLK : 717  
 GmERS1 : -----DKGSTATFII : 584  
 GmERS2 : -----DKGSTATFIV : 584  
 GmETR1 : -----GKGCTVTFIV : 583  
 GmETR2 : -----GKGCTVTFIV : 582

CKI1 : NLGKVTVVEKWEHLSYALERLF---GFSPQSSMG--RAECSLSCPSSRELFIGMDGIDSRSQLPKRRSISFS- : 821  
 AHK5 : SNGGPGISNDFLPHKVMLTSPIKLINGF-----VADPSNNTGQSEMLQLENGGYMDESLETSSGHCPE : 719  
 AHK1 : KHGIATVEASDWNELTQIIRDLL-----ETGS--RDNSFDSQHNISDPLRAELSN-----IVEIKNPVFI : 859  
 AHK2 : RLGISADIVSSLRMACTCC--ISKLEN-----LAMILIDKDAWNKEEFSVLDELFTRSKVTFTR-----VP : 969  
 AHK3 : RLGIRVEVVPVEQALHYLKIGTTTVN-----MILIEQEIWNREA---DDFIKKLQKDPLFL-----SP : 821  
 AHK4 : RLGINVDVVTSLKTAVVAAAFAFERNGSP--LPTKPQLDMILVEKDSWISTEDNDSEIRLLNSRTNGNVVHHK--SP : 853  
 ERS1 : RLGICNGPSSSSSGSMALHLAAK----- : 605  
 ETR1 : KLGISERSNESKQSGIPKVPAI----- : 601  
 OsHK1 : TSGVSVMNNTKLIGGNQFYDPPNILED-----RKPFSNGFVLAEDHSTNSASTAHQSNGPSVSRTNKE : 758  
 OsHK2 : SIGMKVWMPGVESISSTLEKARSSRDD-----CDVDRCFSSKEMVSQVLPPTTLRNNNIMARNLGEHHP : 782  
 OsHK3 : RLGVKTELTAELNQFISKLNLSGLTAK-----LVLIDKETWLKESHCTPLLNVNKLNRNNDKPD-----SP : 810  
 OsHK4 : RLGITSEVVTIDPTFGVLSG--RNGSSLTSIGKKQPCMLLIESDSWGPQMDVSLHARLQEMKQSDRIHV---LP : 797  
 OsHK5 : RLGIQCDLAATSEALSALLESCNSSVK-----SSLNMVLVDKEAWGEDSGLAFFRCLIDLRLKGTLSWQTMP : 990  
 OsHK6 : RLGIIVKVVNLSMGLQTLAG--QNG---VKESREKLSMLFIESDIWRPETDILLNRLHELKNNQVHE---LP : 789  
 OsERS1 : QLGICDNTNAYQKLIPLVWPS----- : 605  
 OsERS2 : ----- : -  
 GmHK01 : RLGIKVKVVEKWRQLHYTLKKI IKQKGLHPNSSSSPESSDSPSASSCTNGVPLSAQDGTNYISSIFKRTDIEASS : 671  
 GmHK02 : SSNGSSRTHKLLTHKIGYTSSHKLGG-----FSESLYFSPNDIMSKGTCSADDASS-VVEVPSEMSE : 720  
 GmHK03 : TSNGPTRPQNILP---GFRSSHFKNG-----ISENSYSFLTNTNRSKGIK-----MSE : 743  
 GmHK04 : SSNGPTRPQNVLP---GFRSSHFNFG-----FSENSFSFLTNIISKGTNSTEDASSVIVDAPEMSE : 765  
 GmHK05 : SSNGSSRTQKLLTHKIGYTSSHKLGG-----FSESLYFSPNDIMSKGTCSVDDASS-VHQDKARAW : 605  
 GmHK06 : SSNALWALFSLMLDLAGHRT-----HSFSPNDIMSKGTCSVDDASS-VVDAPETSE : 539  
 GmHK07 : KNGVCTMEASDWNGLTQILRELF-----HARSSVHNTDFDAHYPAAKEELKSKLLN-----IGDMRNPVFI : 844  
 GmHK08 : KNGVCTMEASDWNGLTQILRELF-----HAGSSVHNTDFEAHYPAAKEELKSKLLN-----IRDMRNPVFI : 844  
 GmHK09 : KNGVVTMEAAEWNGLTQILRVLF-----HARSSAHNNGFDANYSVHDNLKSRLLS-----IQELRNPVFI : 847  
 GmHK10 : RLGMSVDVTYSLNSACSLSNVCNMSM-----LAMILIDKDAWDK-EYHILYTIKKRRQNGIKGDPLN-LP : 869  
 GmHK11 : RLGMSVDVTYSLNSACSLSNVCNKSMS-----TQLAMILIDKDAWDK-ECHILYTIKKRRQNGIKGDPMN-LP : 803  
 GmHK12 : RLGIHVEMVSDLKQGLSTISNGNVVVN-----MVLIEQEVWDRDLGLSSHFNNTRRIDHGV-----PP : 827  
 GmHK13 : RLGIHVEMVSDLKQGLSTISNGNI I IN-----MVLIEQEVWDRDLGLSSHFNNTRRIDQGV-----PP : 827  
 GmHK14 : RLGILVKVANRISKAVALCG---KSGSL--KSGMFQPDIIIMVEKDTWITGEDGIFNTWK---HNGRTIK---MP : 780  
 GmHK15 : RLGILVKVANSISKAVALCG---KTGSL--TSGMFQPDIIIMVEKDTWISGEDGIFNIWK---QNGRMFK---MP : 780  
 GmHK16 : RLGIQAKVANSINKAVSLCG---KNGSL--TSVLFQPDIIIFVEKDSWVCGEDEIFNVWQLDWKQNGHMFK---IP : 776  
 GmHK17 : RLGIQAKVANSFNKAVSLCG---KNGCL--TSGLFQPDIIIFVEKDSWVCVEDGIFNVWQLDWKQNRHIFK---IP : 784  
 GmERS1 : KLEICGNPDPDSDHQAANRSQAY----- : 606  
 GmERS2 : KLGIICGNPDPDSDHQAANRSQAY----- : 606  
 GmETR1 : KLGIIPDRSNEFKLPFVVPKVPGN----- : 605  
 GmETR2 : KLGIIPDRSNEFKLPFVVPKVPGN----- : 604

CKI1 : AVVLLVIDAKTGPFELCDIVKQFRRLPHGISCKVWVWLN-----SSTRVSERGDISCSRPLHGSRIME : 886  
 AHK5 : SAHQYENGNRCFSKES-----ESCSSSQASSEGGTL : 751  
 AHK1 : VVDIGVLDLTTNIWKEQLNYLDRFSN-----KAKFAWLLK---HDTSNVTKTELRRKGHVMMVNKPLYKAKMIQ : 925  
 AHK2 : KIFLLATSATLTERSEM-----KSTGLIDEVVIKPLRMSVLIC : 1007  
 AHK3 : KLILLANSVESSISEAL-----CTGIDPPIVIVKPLRASMLAA : 859  
 AHK4 : KLALFATNITNSEFDRA-----KSAGFADTVIMKPLRASMIGA : 891  
 ERS1 : ----- : -  
 ETR1 : ----- : -  
 OsHK1 : QHDNAMVIELNRQAER-----VSSSRGDTTSVSGLIH : 790  
 OsHK2 : LGMILLIVDVSNQLENIQRQARDFTQMRSQVPCKFVCLTDLR---TSYKDFRRFEEMSCDLILRKPVHGSRLYS : 853  
 OsHK3 : KFLLLGSSASSPKGGSD-----TSREHNLNVIMKPLRASMLQV : 848  
 OsHK4 : KVFLLSA---AESDKV-----KKIHAVDSVIPKPLKASALAA : 831  
 OsHK5 : KFFLLAGSITPADSDCL-----RLAGYSN-SIRKPLRLSTVAA : 1027  
 OsHK6 : KLVLLVT---SEADKD-----RYGSAFDIVMYKPIRASTIAS : 823  
 OsERS1 : ----- : -  
 OsERS2 : ----- : -  
 GmHK01 : GFVLVIDANAGPFSELCKVVAEFKRGLCY--PCRVVWLENPLIPSDNKLKNDVSNNDIVLSKPLHGHRFLFQ : 744  
 GmHK02 : SAS-SSGHSQKTKSN-----GEMSEAKVMGRQTQL : 749  
 GmHK03 : STS-SSSHSPETKQE----- : 757  
 GmHK04 : STG-SSSHSPQTKHENVVNTNQNQDKAHARLQNGSVDSSQH-----KEAMTLGTMSSPEQQTCCQGV : 827  
 GmHK05 : SFNGYADSSEVTVSN-----GEMAGATNSTSEVTK : 635  
 GmHK06 : LAS-SSGHSLETKNK-----SLGQKANTTTQCVT : 568  
 GmHK07 : VVDIGLLDLSTDIWKEQFNFLHRYFG-----RAKFWWMLN---HDTSNVTKMELRRKGHVLMVNKPLYKAKMIQ : 910  
 GmHK08 : VVDIGLLDLSTDIWKEQFNFLHRYFG-----RAKFWWMLN---HDTSNVTKMELRRKGHILMVNKPPLYKAKMIH : 910  
 GmHK09 : AVDIGLLDLSTDIWKEQLNFLHRYFG-----RAKFWWMLN---HDSSNTMKMDLCKRGHTLTVNKPPLYKTKMIH : 913  
 GmHK10 : KIFLLATHLSSNEQDEL-----KSVGVIDDILMKPLWFSSLIQ : 907  
 GmHK11 : KIFLLATHLSSNEQDGL-----KSVGIIIDDILMKPLWLSLIQ : 841  
 GmHK12 : KLFILVNS-SSSFKASV-----NLGVHNPTVITKPLRASMLAA : 864  
 GmHK13 : KLFILVNS-SSSFKASV-----NLGVHNPIVITKPLRASMLAA : 864  
 GmHK14 : KMILLATNISNAEFDKA-----KFTGFTDTVIMKPLRASMLAA : 818  
 GmHK15 : KMILLATNISNAEFDKA-----KATGFTDTVIMKPLRASMLAA : 818  
 GmHK16 : QMILLATNIGNAEFDKA-----KAAGFSDTVIMKPLRASMLAA : 814  
 GmHK17 : QMILLATNIGNDEFDKA-----KAAGFSDTVIMKPLRASMLAA : 822  
 GmERS1 : ----- : -  
 GmERS2 : ----- : -  
 GmETR1 : ----- : -  
 GmETR2 : ----- : -



|        |                                                                             |        |
|--------|-----------------------------------------------------------------------------|--------|
| CKI1   | : VLKMLPEFGGTVLKEPPELQR---ESLLRHSFVAERSPKHKVQEEGPSSMFNKKLGKRIMASTDSESETRVKS | : 958  |
| AHK5   | : EMESELTVSSHREEEKAETE-----                                                 | : 771  |
| AHK1   | : ILEAVIKNRKRGLCN-DLRNRNGSDES--HDCLEIDPTQFDTCSDDSSSETSGEKQVDSVKPSTLHSPVLK   | : 997  |
| AHK2   | : CLQETLVNGKKRQPNRQR-----                                                   | : 1026 |
| AHK3   | : TLQRGLGIGIREPPQHKGPP-----                                                 | : 879  |
| AHK4   | : CLQQVLELRKTRQQHPEG-----                                                   | : 909  |
| ERS1   | : -----                                                                     | : -    |
| ETR1   | : -----                                                                     | : -    |
| OsHK1  | : DERGPCRVHEEKSLHKKSKC-----                                                 | : 810  |
| OsHK2  | : LLMTLRDVQSSPMHRSSLVGHENYVTRHQDSANIVALAEVG-----                            | : 894  |
| OsHK3  | : SLRRALGGVDKVHCRNGVVG-----                                                 | : 868  |
| OsHK4  | : CLFQALGITQPSHEKRDDSGSL-----                                               | : 853  |
| OsHK5  | : CLSKALGVGLTGRRSRDNS-----                                                  | : 1046 |
| OsHK6  | : CLQQLLKVVMP--ERKDN-----                                                   | : 839  |
| OsERS1 | : -----                                                                     | : -    |
| OsERS2 | : -----                                                                     | : -    |
| GmHK01 | : VIRILPEYGG-VWPCSSSETKK---EKGQVSLTDEGAIRRVELQECGSSSVTQQSYDR-----SRARKSHI   | : 806  |
| GmHK02 | : SN-----                                                                   | : 751  |
| GmHK03 | : -----                                                                     | : -    |
| GmHK04 | : KTDITSQSVIKSNKYTSSEV-----                                                 | : 847  |
| GmHK05 | : S-----                                                                    | : 636  |
| GmHK06 | : SSS-----TSEV-----                                                         | : 575  |
| GmHK07 | : ILEAVIKERNLELQKKNMTAPRTTMKEGDLHEFLEIDSTHFDGASSDDSDIPETGGSNPVSANGDKPAEK    | : 985  |
| GmHK08 | : ILEAVINERNLELQKKNMIAPRTTMKEGDLHEFLEIDSTHFDGASSDDSDISEISGNSNPVSANGDKP      | : 985  |
| GmHK09 | : ILESIIKDRNEELQKKNMTTLRATVKEGNLHESLEIDYTQCDVASSDGSIDSETGGSNPVSARGDKQ       | : 988  |
| GmHK10 | : CYRESLGTENKRVNRKKVS-----                                                  | : 926  |
| GmHK11 | : CYRVSLGTENKRVNRKKVS-----                                                  | : 860  |
| GmHK12 | : SLQRAMGVQNKGAP-HRELQ-----                                                 | : 883  |
| GmHK13 | : SLQRAMGVQNKGAP-HRELQ-----                                                 | : 883  |
| GmHK14 | : CLQQVLGMGKKRQLGKDM-----                                                   | : 836  |
| GmHK15 | : CLQQVLGMGKKRRQLGKDM-----                                                  | : 836  |
| GmHK16 | : CLQQVLGTGKKRQHKGKDM-----                                                  | : 833  |
| GmHK17 | : CLQQVLGTGKKRQHKGKDMN-----                                                 | : 841  |
| GmERS1 | : -----                                                                     | : -    |
| GmERS2 | : -----                                                                     | : -    |
| GmETR1 | : -----                                                                     | : -    |
| GmETR2 | : -----                                                                     | : -    |

|        |                                                                         |        |
|--------|-------------------------------------------------------------------------|--------|
| CKI1   | : RTGRKPIGN-----PEDEQET                                                 | : 974  |
| AHK5   | : -----                                                                 | : -    |
| AHK1   | : LIDATTSND-----DSTSASMTQK-----NPEEEDWKDRLYSGIA                         | : 1032 |
| AHK2   | : -----                                                                 | : -    |
| AHK3   | : -----                                                                 | : -    |
| AHK4   | : -----S                                                                | : 910  |
| ERS1   | : -----                                                                 | : -    |
| ETR1   | : -----                                                                 | : -    |
| OsHK1  | : -----                                                                 | : -    |
| OsHK2  | : -----RLDQG                                                            | : 899  |
| OsHK3  | : -----                                                                 | : -    |
| OsHK4  | : -----H-----GRD                                                        | : 857  |
| OsHK5  | : -----                                                                 | : -    |
| OsHK6  | : -----QN                                                               | : 841  |
| OsERS1 | : -----                                                                 | : -    |
| OsERS2 | : -----                                                                 | : -    |
| GmHK01 | : HQG-----EIQEC                                                         | : 814  |
| GmHK02 | : -----                                                                 | : -    |
| GmHK03 | : -----                                                                 | : -    |
| GmHK04 | : -----                                                                 | : -    |
| GmHK05 | : -----                                                                 | : -    |
| GmHK06 | : -----                                                                 | : -    |
| GmHK07 | : ASSPYHMN-----NCLE-----EDSECGETNTVTSSS                                 | : 1012 |
| GmHK08 | : PSSPHHMN-----NCLKNLLVPAPVLPKTTNLNHYPP-----KNHHPFQQKIRMKILN            | : 1034 |
| GmHK09 | : PSSQHQINNVLVGLTNECMEDDNRKEELCQSSLNSNDVTANASPKSSSTKQASFATGARDGDSEYGETR | : 1063 |
| GmHK10 | : -----                                                                 | : -    |
| GmHK11 | : -----                                                                 | : -    |
| GmHK12 | : -----                                                                 | : -    |
| GmHK13 | : -----                                                                 | : -    |
| GmHK14 | : -----PN                                                               | : 838  |
| GmHK15 | : -----PN                                                               | : 838  |
| GmHK16 | : -----PN                                                               | : 835  |
| GmHK17 | : -----PN                                                               | : 843  |
| GmERS1 | : -----                                                                 | : -    |
| GmERS2 | : -----                                                                 | : -    |
| GmETR1 | : -----                                                                 | : -    |
| GmETR2 | : -----                                                                 | : -    |

CKI1 : SKPSDDEFLLRGRVLLVDDNFISRKVATGKLLKKMGVSEVEQCDSGKEARLVT-----EG : 1029  
 AHK5 : -----VKETSKPKILLVEDNKNINIMVAKSMMKQLGHTMDIANN-GVEATAINS----- : 819  
 AHK1 : LDGKNQKSLEGIRILLAEETPVLRVATIMLEKMGATVTAVWD-GQQAVDSLNYKSINAQAPTEEHKSFEEETAN : 1106  
 AHK2 : ---NLGHLLREKQILVVDDNLVNRVAEGALKKYGAIVTCVES-GKAAALMLKPP----- : 1077  
 AHK3 : -ALILRNLLGRKILIVDDNNVNLVAAGALKKYGADVCAES-GIKATSLKPP----- : 932  
 AHK4 : SPATLKSLLTGKKILVVDDNIVNRVAAGALKKFGAEVVCAES-GQVALGLLQIP----- : 964  
 ERS1 : ---SQT-----RPWNW----- : 613  
 ETR1 : ---PRHSNFTGLKVLVMDENGVSRRVTKGLLVHLGCEVTTVSS-NEECLRVVSHE----- : 652  
 OsHK1 : -----SPSSNAKILLVEDNKNINIMVAKSMLEQLGHGIDIVNN-GLEAIRAQK----- : 858  
 OsHK2 : LKTEEDRPLDGMHVLVVEDTLVLQTTQRKMLNQLGAIVELAGD-GAKAVDMFRDAIER----- : 956  
 OsHK3 : -NSTLGSLLHKKQIVVDDNIVNLKVAAGALKKYGAEVTCADS-GKKAITLLKPP----- : 921  
 OsHK4 : GSGSLHGLLLGKNILVVDDNKNVNLVAAGTLKKYGAKEVCES-GKDAVSLKQVP----- : 911  
 OsHK5 : --LVLRSVLTGKNILVVDDNAVNRVAAGALKKYGAIVTCVDS-GKEAISRKQPP----- : 1098  
 OsHK6 : RPSFLRSLIGKNILIVDDNKNVNLVAAGALKKYGAKVHCVES-GKDAVSLKQPP----- : 895  
 OsERS1 : ---SGDADFVGPVNPAPNEEKQASLKSRYQRSI----- : 636  
 OsERS2 : ----- : -  
 GmHK01 : EELSNEKPLWGMKCLVVEDVLLRRITKSTLDRLGAS-VMECENGEQAVQTV-----EG : 868  
 GmHK02 : -----ALQTAILLVEDNKNINMVTQSMKQLGHSIDVNN-GVEAVRAVQR----- : 796  
 GmHK03 : -----RPKILLVEDNKNINMVTQSMKRLGYSDVNN-GVEAVRAVQH----- : 800  
 GmHK04 : -----TKSTLGPKILLVEDNKNINMVTQSMKRLGYGMDVNN-GVEAVRAVQR----- : 895  
 GmHK05 : -----TIKPKILLVEDNKNINMVTQSMKQLGHSIDVNN-GVEAVRAVQR----- : 681  
 GmHK06 : -----TKSTIKPKILLVEDNKNINMVTQSMKQLGHSIDVNN-GVEAVRAVQR----- : 623  
 GmHK07 : KAVDGKKSLEGLKILLAEETPVLRVATIMLEKMGADVAVGD-GQQAVDALN-----CMFAAEDCRRESLQKER : 1081  
 GmHK08 : VGTQIGSPAQGLKILLAEETPVLRVATIMLEKMGADVAVGD-GQQAVDALN-----CMFTAEDCRRESLQKER : 1103  
 GmHK09 : RAVSGKKSLEGLRILLAEETPVLRVATIMLEKMGADVAVGD-GRQAVDALN-----GMSGVEDCRRETLKER : 1132  
 GmHK10 : ---KLGNLLIDKQILVVDDNAVNRVAAGVLRQYKAKVTAVES-GRAALKMLELP----- : 977  
 GmHK11 : ---KLGNLLIDKQILVVDDNAVNRVAAGVLRQYKAKVTAVES-GRAALKMLKLP----- : 911  
 GmHK12 : -SLSLRHLLRGRKILIVDDNGVNRVAAGALKKYGADVVCVSS-GKDAITSLKPP----- : 936  
 GmHK13 : -SLSLRHLLRGRKILIVDDNSVNRVAAGALKKYGADVVCVSS-GKDAITSLKPP----- : 936  
 GmHK14 : G--FLHSLLYGKKILVVDDNGVNRVAAGALKKFGADVKAES-GKVALEMLQLP----- : 890  
 GmHK15 : G--FLHSLLYGKKILVVDDNGVNRVAAGALKKFGADVKAES-GKAALEMLQLP----- : 890  
 GmHK16 : GSTLVRSLLCGKKILVVDDNVNRRVAAGALKNFGADVTCAES-GKTALEMLQLP----- : 889  
 GmHK17 : GSTFVRSLLCGKKILVVDDNVNRRVAAGALKNFGADVTCAES-GKTALEMLQLP----- : 897  
 GmERS1 : ---SGSGGLARFKPFIKDEDDTGFSTRRNQRSF----- : 636  
 GmERS2 : ---SGSGGLARFKPFIIDENDTGFSTRRNQRSF----- : 636  
 GmETR1 : ---HGSTNFAGLKVLVTDNGVSRVTKGLIMHLGCDVTTASS-SEECLRVVSLE----- : 656  
 GmETR2 : ---HGSTNFAGLKVLVMDNGVSRVTKGLIMHLGCDVTTASS-SEECLRVVSLE----- : 655

CKI1 : LTQREEQGSVDKLPFDYIFMDCQMPVMDGYEATREIRKVEKSYG-----VR : 1075  
 AHK5 : -----SSYDLVLMVDCMPVLDGLKATRLIRSYEETGNWNAAIEAGVDISTSE----NEQVCMRP-TNR : 877  
 AHK1 : KVTTRETSRLNSSPYDLILMDCQMPKMDGYEATKAIIRRAEIGTE-----LH : 1152  
 AHK2 : -----HNFDAFCMDLQMPVMDGYEATRRVRELEREINKKIASGEVSAEMFCK-----FSSWH : 1129  
 AHK3 : -----HEFDAFCMDIQMPVMDGYEATRRIRDMEEEMNKRIKNGEALIVENG-----KTSWH : 984  
 AHK4 : -----HTFDAFCMDIQMPVMDGYEATRRIRMMEKETK-EKTN-----LEWH : 1004  
 ERS1 : ----- : -  
 ETR1 : -----HKVVFMDVCMPEGVNYQIALRIHEK-----FTKQRHQ : 684  
 OsHK1 : -----RQYDIILMDVHMPVMDGLQATKFIIRSFENTGCWDTSVKPEHDQIIAGSDNLSDCAHMCKQGR : 921  
 OsHK2 : --ASVSEEHVPLPYDVIFMDCQMPVMDGYEATRRIRREESRYG-----IR : 1000  
 OsHK3 : -----HNFDAFCMDIQMPVMDGYEATRRIRVMERDLNERIERGEAPP-ECAS-----IQRWR : 972  
 OsHK4 : -----HKFDLCLMDIQMPVMDGYEATRRIRAMEGKANEQADDSESGSEIAAK-----TAKWH : 963  
 OsHK5 : -----HKFDACFMDVQMPVMDGYEATRRVRSVESKIN----- : 1130  
 OsHK6 : -----HCFDAFCMDVQMPVMDGYEATRRIRQMEVKANEER--KALDLMEGST-----FVESH : 945  
 OsERS1 : ----- : -  
 OsERS2 : ----- : -  
 GmHK01 : LTRNSSNR-----PCDFILMDCQMPVMDGYEATRRIRREIEKSHG-----VH : 909  
 GmHK02 : -----HTYDLILMDVCMPEGVNYQIALRIHEK-----FTKQRHQ : 684  
 GmHK03 : -----HTYDIILMDVYMPVMDGLQATKFIIRSYEDTGNWEAARKAGIEQLIC-----LLVHYIESRRQE : 858  
 GmHK04 : -----HTYDVILMDVYMPVMDGLQATKFIIRSYEETGNWEAAREAGIEQCSP-----ASNECSVPLKNR : 953  
 GmHK05 : -----HTYDLILMDVCMPEGVNYQIALRIHEK-----FTKQRHQ : 684  
 GmHK06 : -----HTYDLILMDVCMPEGVNYQIALRIHEK-----FTKQRHQ : 684  
 GmHK07 : NTR-SQTEISTCRPYDLILMDCQMPKMDGYEATKAIIRKSEVGT-----MH : 1126  
 GmHK08 : NTR-SQTEISTCRPYDLILMDCQMPKMDGYEATKAIIRKSEVGT-----RH : 1148  
 GmHK09 : NTRSSQTEILSCPPYDLILMDCQMPKMDGYEATKAIIRKSEEGTG-----LH : 1178  
 GmHK10 : -----HNFDAFCMDLQMPVMDGYEATRRIRCLESEVNEKIACGQASAEMFGN-----ISYWH : 1029  
 GmHK11 : -----HNFDAFCMDLQMPVMDGYEATRRIRCLESEVNEKIACGQASAEMFGS-----ISYWH : 963  
 GmHK12 : -----HQFDAFCMDIQMPVMDGYEATRRIRREMEDSVNR-----EVSMDDFEN-----ITNWH : 983  
 GmHK13 : -----HQFDAFCMDIQMPVMDGYEATRRIRREMEDSVNR-----EVSMDDFEN-----ITNWH : 983  
 GmHK14 : -----HNFDAFCMDIQMPVMDGYEATSRIRMMESKAN-EEMN-----GSEWH : 931  
 GmHK15 : -----HNFDAFCMDIQMPVMDGYEATSRIRMMESKAN-EEMN-----GNEWH : 932  
 GmHK16 : -----HNFDAFCMDIQMPVMDGYEATRRIRMMETKANEQQMN--GEGNGWK-----DK-YH : 937  
 GmHK17 : -----HNFDAFCMDIQMPVMDGYEATRRIRMMETKANEQQMNGECGEGNGWK-----DKKYH : 949  
 GmERS1 : ----- : -  
 GmERS2 : ----- : -  
 GmETR1 : -----HEVVFMDVCA-GLDGYELAIRIHEK-----FTKHQ-D : 686  
 GmETR2 : -----HEVVFMDVCT-GLDGYELAVRIHEK-----FTKHQ-D : 685

CKI1 : TPPIA-----VS GHDPGSEEARETIQA GMD AFLDKSLN--QLANVIR : 1115  
 AHK5 : LPPII-----AMTANTLAESSEEC-YANGMDSFISKPVTLQKIRECLQ : 918  
 AHK1 : IPIVA-----LTAHAMSSDEAKC-LEVGM DAYLTKPIDRKL MVSTIL : 1193  
 AHK2 : VPILA-----MTADVIQATHEEC-MKCGMDGYVSKPFEEVLYTAVA : 1170  
 AHK3 : LPVLA-----MTADVIQATHEEC-LKCGMDGYVSKPFEEQLYREVS : 1025  
 AHK4 : LPILA-----MTADVIHATYEEC-LKSGMDGYVSKPFEEENLYKSVA : 1045  
 ERS1 : ----- : -  
 ETR1 : RPLIVA-----LSGNTDKSTKEKC-MSFGLDGVLLKPVSLDNIRDVLS : 726  
 OsHK1 : VPII-----AMTANFSSESAAEC-LAAGMDSYISKPVNFQNIKECLQ : 962  
 OsHK2 : TPPIA-----LTAHSMEDDLQKA-IDVGM DLHMTKPIERRRIVEAVH : 1041  
 OsHK3 : TPILA-----MTADVIQATHEEC-LKSEMDGYVSKPFEEGELYSEVA : 1013  
 OsHK4 : LPILA-----MTADVIQATHEEC-TKCGMDGYVSKPFEEKQLFQAVQ : 1004  
 OsHK5 : DTIQA-----ASAKNPFQDNNIA-KQKSYAVNREQKFDWTAIYVSFD : 1171  
 OsHK6 : LPVLA-----MTADVIQATYEEC-IKSGMDGYVSKPFDEEQLYQAVS : 986  
 OsERS1 : ----- : -  
 OsERS2 : ----- : -  
 GmHK01 : IPIFA-----LTAN--TGKEAILSIEAGMD DHIKPINKEALLKAIK : 949  
 GmHK02 : IPIV-----AMTANALSESAAEC-FANGMDSFVSKPVAFQKIKKECIE : 896  
 GmHK03 : LQHVNLYKHADKKPYTQLFKQLSPDKEYATCHPQCSMMTANTMSESAEEC-YANGMDSFVSKPVTFQKIKDCLE : 932  
 GmHK04 : IHII-----AMTANTMSESADEC-YANGMDSFVSKPVTFQKIKDCLE : 994  
 GmHK05 : VPIV-----AMTANALSESAAEC-FANGMDSFVSKPVTFQKIKKECIE : 781  
 GmHK06 : VPIV-----AMTANALSESAAEC-FANGMDSFVSKPVTFQKIKKECIE : 723  
 GmHK07 : IPIVA-----LTAHAMSCDEAKC-LEVGM DAYLTKPIDFKMMVSTIL : 1167  
 GmHK08 : IPIVA-----LTAHAMSCDEAKC-LEVGM DAYLTKPIDFKMMVSTIL : 1189  
 GmHK09 : IPIVA-----LTAHAMSCDEAKC-LEVGM DAYLTKPIDFKLMESTIL : 1219  
 GmHK10 : IPIA-----MTADSTQSSNEEC-IKCGMNDYVSKPFEEEQLYMAMA : 1070  
 GmHK11 : IPIA-----MTADSTQSSNEEC-IKCGMDDYVSKPFEEEEKLYMAMA : 1004  
 GmHK12 : VPILA-----MTADVIQATHEEC-LRCGMDGYVSKPFEEQLYREVS : 1024  
 GmHK13 : VPILA-----MTADVIHATHEEC-LKWGM DGYVSKPFEEQLYREVS : 1024  
 GmHK14 : VPILA-----MTADVILATYDKC-VKCGMDGYVSKPFEEENLYQEVA : 972  
 GmHK15 : VPILA-----MTADVIHATYDKC-MKCGMDGYVSKPFEEENLYQEVA : 973  
 GmHK16 : IPIA-----MTADVIHATYDEC-VKYGM DGYVSKPFEEENLYQAVA : 978  
 GmHK17 : IPIA-----MTADVIHATYDEC-VKCGMDGYVSKPFEEENLYQAVA : 990  
 GmERS1 : ----- : -  
 GmERS2 : ----- : -  
 GmETR1 : RPLIVA-----LTGNTKKVTKENC-MRVGMDGLILKPVSVDKMRGVLS : 728  
 GmETR2 : RPLIVA-----LTGNTKKVTKENC-MRVGMDGLILKPVSVDKMRGVLS : 727

CKI1 : EIESKRH----- : 1122  
 AHK5 : QYLH----- : 922  
 AHK1 : SLTKPSAFQTSLSA----- : 1207  
 AHK2 : RFFEPC----- : 1176  
 AHK3 : RFFNSPSDTES----- : 1036  
 AHK4 : KSFKNPISPSS----- : 1057  
 ERS1 : ----- : -  
 ETR1 : DLLEPRVLYEGM----- : 738  
 OsHK1 : QYLPPQ----- : 968  
 OsHK2 : GVCKGKN----- : 1048  
 OsHK3 : RFFQNHDQVE----- : 1023  
 OsHK4 : KFLGPCVSS----- : 1013  
 OsHK5 : NWMKSISTSRLOPCA----- : 1186  
 OsHK6 : RLVVGTKE SAV----- : 997  
 OsERS1 : ----- : -  
 OsERS2 : ----- : -  
 GmHK01 : RIYTKE----- : 955  
 GmHK02 : QYLVNFS----- : 903  
 GmHK03 : QYLR----- : 936  
 GmHK04 : QYLR----- : 998  
 GmHK05 : QYLVNFS----- : 788  
 GmHK06 : QYLVNFS----- : 730  
 GmHK07 : SLTKRTS----- : 1174  
 GmHK08 : SLTKRTS----- : 1196  
 GmHK09 : SLTRGTS----- : 1226  
 GmHK10 : RFFKSDS----- : 1077  
 GmHK11 : RFFKSDT----- : 1011  
 GmHK12 : RFFQSS----- : 1030  
 GmHK13 : RFFQSS----- : 1030  
 GmHK14 : KFFKSKTISDS----- : 983  
 GmHK15 : KFFKSKTMSDS----- : 984  
 GmHK16 : KFFNPKPTTDNSLIENGRT- : 997  
 GmHK17 : KFFNPKPTSIIQQNARTGKAT : 1010  
 GmERS1 : ----- : -  
 GmERS2 : ----- : -  
 GmETR1 : ELLERRVLFETV----- : 740  
 GmETR2 : ELLERRVLFESV----- : 739
